# Supplementary material
Source: publisher figshare collection journal article supplement (https://plos.figshare.com/articles/dataset/_/992947)
Supplement: Supplementary file 1 [file 1 › Table_S1.pdf]

| Table S1. DSST* Scores Across Saliva Collection Time Points                                                                                                                                                                                                                                     |    |    |    |    |    |
|-------------------------------------------------------------------------------------------------------------------------------------------------------------------------------------------------------------------------------------------------------------------------------------------------|----|----|----|----|----|
| HIV <sup>-</sup> Heroin Addicts                                                                                                                                                                                                                                                                 |    |    |    |    |    |
| Subject #                                                                                                                                                                                                                                                                                       | 1  | 2  | 3  | 4  | 5  |
| 1                                                                                                                                                                                                                                                                                               | 46 | 49 | 55 | 62 | 61 |
| 2                                                                                                                                                                                                                                                                                               | 31 | 12 | 32 | 29 | 30 |
| 3                                                                                                                                                                                                                                                                                               | 61 | 62 | 63 |    |    |
| 4                                                                                                                                                                                                                                                                                               | 44 | 25 | 31 |    |    |
| 5                                                                                                                                                                                                                                                                                               | 28 | 35 | 27 | 27 | 28 |
| 6                                                                                                                                                                                                                                                                                               | 65 | 61 | 59 | 67 | 73 |
| 7                                                                                                                                                                                                                                                                                               | 51 | 38 | 48 | 56 |    |
| 8                                                                                                                                                                                                                                                                                               | 35 | 30 | 24 | 22 | 48 |
| 9                                                                                                                                                                                                                                                                                               | 19 | 42 | 34 | 39 | 45 |
| 10                                                                                                                                                                                                                                                                                              | 21 | 23 | 24 | 30 | 25 |
| 11                                                                                                                                                                                                                                                                                              | 39 | 20 | 34 |    |    |
| HIV <sup>+</sup> Heroin Addicts                                                                                                                                                                                                                                                                 |    |    |    |    |    |
| 1                                                                                                                                                                                                                                                                                               | 38 |    |    | 42 | 37 |
| 2                                                                                                                                                                                                                                                                                               | 21 | 32 | 19 | 20 | 31 |
| 3                                                                                                                                                                                                                                                                                               | 47 | 43 | 55 | 58 | 47 |
| 4                                                                                                                                                                                                                                                                                               | 35 | 33 | 43 | 45 | 43 |
| 5                                                                                                                                                                                                                                                                                               | 21 | 21 | 26 | 16 | 30 |
| 6                                                                                                                                                                                                                                                                                               | 26 | 29 | 31 | 23 | 33 |
| 7                                                                                                                                                                                                                                                                                               | 35 | 40 | 25 | 35 | 38 |
| 8                                                                                                                                                                                                                                                                                               | 38 | 53 | 46 | 33 |    |
| Non-Heroin, HIV <sup>-</sup>                                                                                                                                                                                                                                                                    |    |    |    |    |    |
| 1                                                                                                                                                                                                                                                                                               | 46 | 49 |    |    |    |
| 2                                                                                                                                                                                                                                                                                               | 12 | 18 |    |    |    |
| 3                                                                                                                                                                                                                                                                                               | 44 | 34 |    |    |    |
| 4                                                                                                                                                                                                                                                                                               | 22 | 21 |    |    |    |
| 5                                                                                                                                                                                                                                                                                               | 49 | 54 |    |    |    |
| 6                                                                                                                                                                                                                                                                                               | 43 | 28 |    |    |    |
| 7                                                                                                                                                                                                                                                                                               | 21 | 21 |    |    |    |
| 8                                                                                                                                                                                                                                                                                               | 65 | 57 |    |    |    |
| 9                                                                                                                                                                                                                                                                                               | 45 | 48 |    |    |    |
| 10                                                                                                                                                                                                                                                                                              | 49 | 34 |    |    |    |
| 11                                                                                                                                                                                                                                                                                              | 18 | 43 |    |    |    |
| *DSST = Digit Symbol Substitution Test. The DSST was administered on the day of each saliva sample collection. There is not an agreed-upon threshold for normality for the DSST score, but lower DSST scores indicate worse performance (Rosano et al. J Am Geriatric Soc 2008; 56: 1618-1625). |    |    |    |    |    |
