# Supplementary material
Source: publisher figshare collection journal article supplement (https://plos.figshare.com/articles/dataset/_/992947)
Supplement: Supplementary file 1 [file 1 › Table_S2.xlsx]

## Sheet: HIVpositive
Peptide	Protein	UniProt	PeptideEx	Percent_Coverage	PeptideCount	STAC_Score	Uniqueness_Probability	MassErrorPPM	MSGF_SpecProb
AADDTWEPFASGK	TTHY_HUMAN	P02766	K.AADDTWEPFASGK.T	43.537	3	0.99376	1	0.637479	1.46484e-18
AADKLGSTQIVK	LPLC1_HUMAN	Q9H4V6	K.AADKLGSTQIVK.I	45.041	20	0.99163	1	1.38197	3.90625e-16
AADKLIQNLDANHDGR	S10AG_HUMAN	Q96FQ6	K.AADKLIQNLDANHDGR.I	67.961	9	0.99324	1	0.621016	3.58598e-17
AADTDGDGQVNYEEFVR	CALL3_HUMAN	P27482	R.AADTDGDGQVNYEEFVR.V	43.624	4	0.99098	1	-0.0766124	6.3324e-22
AAEVYGTER	TRFL_HUMAN	Q8TCD2	V.AAEVYGTER.Q	34.085	34	0.99321	1	0.493528	1.95313e-12
AAFNSGK	G3P_HUMAN	P04406	R.AAFNSGK.V	65.97	33	0.9883	0.719059	1.7306	7.8125e-11
AAFNSGKVDIV	G3P_HUMAN	P04406	R.AAFNSGKVDIV.A	65.97	33	0.99405	1	0.561097	2.15332e-15
AAFNSGKVDIVAINDPFIDLNYMVYMFQYDSTHGK	G3P_HUMAN	P04406	R.AAFNSGKVDIVAINDPFIDLNYMVYMFQYDSTHGK.F	65.97	33	0.99044	1	0.53426	3.63244e-27
AAGVGEFEAGISK	EF1A1_HUMAN	P68104	V.AAGVGEFEAGISK.N	36.58	16	0.99316	1	0.96305	2.44141e-17
AAGVGEFEAGISK	EF1A2_HUMAN	Q05639	V.AAGVGEFEAGISK.N	18.79	9	0.99316	1	0.96305	2.44141e-17
AAGVGEFEAGISK	EF1A3_HUMAN	Q5VTE0	V.AAGVGEFEAGISK.N	36.58	16	0.99316	1	0.96305	2.44141e-17
AAIFDTENLEK	DESP_HUMAN	P15924	I.AAIFDTENLEK.I	49.739	138	0.99029	1	0.702614	1.44531e-13
AALEDTLAETEAR	K1C19_HUMAN	Q9P1Y4	K.AALEDTLAETEAR.F	40	16	0.99341	1	1.65884	4.88281e-18
AALSYVSEIGK	BPIL1_HUMAN	Q8N4F0	K.AALSYVSEIGK.A	41.266	14	0.99358	1	0.732795	1.95313e-15
AALSYVSEIGKAPLQR	BPIL1_HUMAN	Q8N4F0	K.AALSYVSEIGKAPLQR.A	41.266	14	0.99336	1	1.08617	2.60112e-20
AAMIVNQLSK	PLAK_HUMAN	P14923	K.AAMIVNQLSK.K	42.55	30	0.99331	1	0.900064	7.8125e-14
AAPEASGTPSSDAVSR	COR1A_HUMAN	P31146	R.AAPEASGTPSSDAVSR.L	31.67	9	0.99217	1	-0.0903642	1.63208e-18
AAPFNNWMESAMEDLQDMFIVHTIEEIEGLISAHDQFK	ACTN4_HUMAN	O43707	R.AAPFNNWMESAMEDLQDMFIVHTIEEIEGLISAHDQFK.S	42.371	27	0.99181	1	0.776572	1.77037e-23
AAPSVTLFPPSSEELQANK	LAC6_HUMAN	P0CF74	K.AAPSVTLFPPSSEELQANK.A	36.792	3	0.9911	1	-0.285691	9.8329e-17
AAPSVTLFPPSSEELQANK	LAC7_HUMAN	A0M8Q6	K.AAPSVTLFPPSSEELQANK.A	36.792	3	0.9911	1	-0.285691	9.8329e-17
AAQEEYVKR	ALDOA_HUMAN	P04075	K.AAQEEYVKR.A	34.341	13	0.99217	1	-0.111939	7.8125e-13
AATYHVDR	SPB3_HUMAN	Q8IXI3	K.AATYHVDR.S	42.821	15	0.99026	1	0.0542165	3.90625e-12
AATYHVDR	SPB4_HUMAN	P48594	K.AATYHVDR.S	27.179	10	0.99026	1	0.0542165	3.90625e-12
AAVAAVLSPEEFMVLLDSVLPESAHR	LPLC1_HUMAN	Q9H4V6	K.AAVAAVLSPEEFMVLLDSVLPESAHR.L	45.041	20	0.99414	1	1.08936	4.56372e-25
AAVLEYLTAEILELAGNAAR	H2A1B_HUMAN	P04908	L.AAVLEYLTAEILELAGNAAR.D	57.692	14	0.9934	1	1.56876	4.48773e-19
AAVLEYLTAEILELAGNAAR	H2A1C_HUMAN	Q93077	L.AAVLEYLTAEILELAGNAAR.D	63.077	15	0.9934	1	1.56876	4.48773e-19
AAVLEYLTAEILELAGNAAR	H2A1D_HUMAN	P20671	L.AAVLEYLTAEILELAGNAAR.D	57.692	14	0.9934	1	1.56876	4.48773e-19
AAVLEYLTAEILELAGNAAR	H2A1H_HUMAN	Q96KK5	L.AAVLEYLTAEILELAGNAAR.D	64.062	15	0.9934	1	1.56876	4.48773e-19
AAVLEYLTAEILELAGNAAR	H2A1J_HUMAN	Q99878	L.AAVLEYLTAEILELAGNAAR.D	64.062	15	0.9934	1	1.56876	4.48773e-19
AAVLEYLTAEILELAGNAAR	H2A1_HUMAN	P0C0S8	L.AAVLEYLTAEILELAGNAAR.D	63.077	15	0.9934	1	1.56876	4.48773e-19
AAVLEYLTAEILELAGNAAR	H2A2A_HUMAN	Q6FI13	M.AAVLEYLTAEILELAGNAAR.D	63.077	16	0.9934	1	1.56876	4.48773e-19
AAVLEYLTAEILELAGNAAR	H2A2B_HUMAN	Q8IUE6	L.AAVLEYLTAEILELAGNAAR.D	49.231	12	0.9934	1	1.56876	4.48773e-19
AAVLEYLTAEILELAGNAAR	H2A2C_HUMAN	Q16777	M.AAVLEYLTAEILELAGNAAR.D	63.566	16	0.9934	1	1.56876	4.48773e-19
AAVLEYLTAEILELAGNAAR	H2A3_HUMAN	Q7L7L0	L.AAVLEYLTAEILELAGNAAR.D	57.692	14	0.9934	1	1.56876	4.48773e-19
AAVLEYLTAEILELAGNAAR	H2AJ_HUMAN	Q9BTM1	L.AAVLEYLTAEILELAGNAAR.D	63.566	15	0.9934	1	1.56876	4.48773e-19
AAVLEYLTAEILELAGNAAR	H2AX_HUMAN	P16104	L.AAVLEYLTAEILELAGNAAR.D	39.86	11	0.9934	1	1.56876	4.48773e-19
AAVLEYLTAEILELAGNAAR	H2AY_HUMAN	O75367	M.AAVLEYLTAEILELAGNAAR.D	5.914	9	0.9934	1	1.56876	4.48773e-19
AAVPSGASTGIYEALELR	ENOA_HUMAN	Q6GMP2	R.AAVPSGASTGIYEALELR.D	64.977	24	0.99429	1	0.215085	3.08991e-22
AAYEAELGDARK	LMNA_HUMAN	P02545	K.AAYEAELGDARK.T	24.096	14	0.84593	1	1.3655	1.03209e-12
AAYEDFNVQLR	MUC5B_HUMAN	Q7M4S5	R.AAYEDFNVQLR.R	6.265	25	0.99408	1	0.531616	1.95313e-15
AAYEDFNVQLRR	MUC5B_HUMAN	Q7M4S5	R.AAYEDFNVQLRR.G	6.265	25	0.97826	1	0.909206	1.79381e-12
AAYLQETGKPLDETLK	ANXA1_HUMAN	P04083	K.AAYLQETGKPLDETLK.K	67.052	42	0.99415	1	0.687245	8.46988e-18
AAYLQETGKPLDETLKK	ANXA1_HUMAN	P04083	K.AAYLQETGKPLDETLKK.A	67.052	42	0.99418	1	0.487441	1.60714e-18
ADAAPDEKVLDSGFR	PIGR_HUMAN	P01833	K.ADAAPDEKVLDSGFR.E	27.88	25	0.99316	1	1.11972	6.54595e-15
ADAAPDEKVLDSGFREIENK	PIGR_HUMAN	P01833	K.ADAAPDEKVLDSGFREIENK.A	27.88	25	0.99308	1	0.891935	9.91382e-19
ADAVTLDGGFIYEAGLAPYK	TRFL_HUMAN	Q8TCD2	R.ADAVTLDGGFIYEAGLAPYK.L	34.085	34	0.99282	1	1.12443	9.36874e-22
ADDGRPFPQVIK	ALDOA_HUMAN	P04075	K.ADDGRPFPQVIK.S	34.341	13	0.99287	1	0.906236	9.76563e-17
ADEFLNWHALFESIKR	KTDAP_HUMAN	P60985	K.ADEFLNWHALFESIKR.K	27.273	2	0.99295	1	0.952205	3.60467e-16
ADEGISFR	PRDX1_HUMAN	Q06830	K.ADEGISFR.G	48.744	12	0.9942	1	0.865546	1.95313e-11
ADHGEPIGR	H90B3_HUMAN	Q58FF7	H.ADHGEPIGR.G	12.563	6	0.97312	1	1.23214	9.375e-11
ADHGEPIGR	HS90B_HUMAN	P08238	R.ADHGEPIGR.G	24.171	15	0.97312	1	1.23214	9.375e-11
ADLELHYQEFIR	DESP_HUMAN	P15924	I.ADLELHYQEFIR.N	49.739	138	0.99311	1	0.714462	1.73828e-13
ADLEMQIENLKEELAYLKK	K1C17_HUMAN	Q8N1P6	R.ADLEMQIENLKEELAYLKK.N	60.648	30	0.99184	1	1.46764	1.07697e-18
ADLEMQIESLKEELAYLK	K1C14_HUMAN	P02533	R.ADLEMQIESLKEELAYLK.K	60.593	45	0.99326	0.999999	0.785972	9.70703e-21
ADLEMQIESLKEELAYLKK	K1C14_HUMAN	P02533	R.ADLEMQIESLKEELAYLKK.N	60.593	45	0.99262	0.998867	1.11969	5.18041e-19
ADLEMQIESLTEELAYLKK	K1C10_HUMAN	P13645	K.ADLEMQIESLTEELAYLKK.N	52.74	27	0.99135	1	1.29565	4.58845e-19
ADLINNLGTIAK	H90B2_HUMAN	Q58FF8	K.ADLINNLGTIAK.F	18.373	6	0.99371	1	0.612387	1.02158e-14
ADLINNLGTIAK	HS902_HUMAN	Q14568	K.ADLINNLGTIAK.S	20.408	6	0.99371	1	0.612387	1.02158e-14
ADLINNLGTIAK	HS90A_HUMAN	P07900	K.ADLINNLGTIAK.S	19.945	13	0.99371	1	0.612387	1.02158e-14
ADLINNLGTIAK	HS90B_HUMAN	P08238	K.ADLINNLGTIAK.S	24.171	15	0.99371	1	0.612387	1.02158e-14
ADLSGITGAR	AACT_HUMAN	Q6NSC9	K.ADLSGITGAR.N	4.492	2	0.99388	1	0.764145	8.20313e-13
ADLSGMSGAR	ILEU_HUMAN	P30740	K.ADLSGMSGAR.D	59.367	17	0.99269	1	1.51758	4.10156e-13
ADTLTDEINFLR	K2C6A_HUMAN	P02538	K.ADTLTDEINFLR.A	70.035	77	0.99314	1	0.251225	1.95313e-16
ADTLTDEINFLR	K2C6B_HUMAN	P04259	K.ADTLTDEINFLR.A	68.44	73	0.99314	1	0.251225	1.95313e-16
ADTLTDEINFLR	K2C6C_HUMAN	P48668	K.ADTLTDEINFLR.A	67.553	75	0.99314	1	0.251225	1.95313e-16
ADTLTDEINFLRA	K2C6A_HUMAN	P02538	K.ADTLTDEINFLRA.L	70.035	77	0.99084	1	1.01662	4.1001e-16
ADTLTDEINFLRA	K2C6B_HUMAN	P04259	K.ADTLTDEINFLRA.L	68.44	73	0.99084	1	1.01662	4.1001e-16
ADTLTDEINFLRA	K2C6C_HUMAN	P48668	K.ADTLTDEINFLRA.L	67.553	75	0.99084	1	1.01662	4.1001e-16
ADVDVSGPK	AHNK_HUMAN	Q09666	K.ADVDVSGPK.M	19.508	36	0.98721	0.999994	1.16308	3.90625e-13
AEAEALYQTK	K2C3_HUMAN	P12035	K.AEAEALYQTK.L	32.006	23	0.99335	1	0.890646	3.90625e-14
AEAEALYQTK	K2C4_HUMAN	P19013	K.AEAEALYQTK.V	74.532	75	0.99335	1	0.890646	3.90625e-14
AEAEALYQTK	K2C71_HUMAN	Q3SY84	K.AEAEALYQTK.F	5.545	5	0.99335	1	0.890646	3.90625e-14
AEAEALYQTK	K2C73_HUMAN	Q86Y46	K.AEAEALYQTK.F	7.593	7	0.99335	1	0.890646	3.90625e-14
AEAEALYQTK	K2C74_HUMAN	Q7RTS7	K.AEAEALYQTK.I	3.97	4	0.99335	1	0.890646	3.90625e-14
AEAEALYQTK	K2C78_HUMAN	Q8N1N4	K.AEAEALYQTK.Y	44.038	31	0.99335	1	0.890646	3.90625e-14
AEAESLYQSK	K2C1_HUMAN	P04264	K.AEAESLYQSK.Y	66.77	58	0.99396	1	1.22015	3.90625e-14
AEAESWYQTK	K2C6A_HUMAN	P02538	R.AEAESWYQTK.Y	70.035	77	0.99402	1	0.302671	1.95313e-14
AEAESWYQTK	K2C6B_HUMAN	P04259	R.AEAESWYQTK.Y	68.44	73	0.99402	1	0.302671	1.95313e-14
AEAESWYQTK	K2C6C_HUMAN	P48668	R.AEAESWYQTK.Y	67.553	75	0.99402	1	0.302671	1.95313e-14
AEAESWYQTK	K2C75_HUMAN	O95678	R.AEAESWYQTK.Y	20.145	22	0.99402	1	0.302671	1.95313e-14
AEAESWYQTKYEELQVTAGR	K2C6A_HUMAN	P02538	R.AEAESWYQTKYEELQVTAGR.H	70.035	77	0.99317	1	-0.0322292	1.06637e-21
AEAESWYQTKYEELQVTAGR	K2C6C_HUMAN	P48668	R.AEAESWYQTKYEELQVTAGR.H	67.553	75	0.99317	1	-0.0322292	1.06637e-21
AEAESWYQTKYEELQVTAGR	K2C75_HUMAN	O95678	R.AEAESWYQTKYEELQVTAGR.H	20.145	22	0.99317	1	-0.0322292	1.06637e-21
AEAHFER	CF058_HUMAN	Q6P5S2	K.AEAHFER.S	33.939	8	0.99189	1	0.225886	7.8125e-11
AEDGSVIDYELIDQDAR	ANXA2_HUMAN	P07355	R.AEDGSVIDYELIDQDAR.D	53.097	24	0.99316	1	0.215056	1.4047e-18
AEEREQIKTLNNK	K2C6A_HUMAN	P02538	R.AEEREQIKTLNNK.F	70.035	77	0.99312	1	0.525949	3.66719e-14
AEEREQIKTLNNK	K2C6B_HUMAN	P04259	R.AEEREQIKTLNNK.F	68.44	73	0.99312	1	0.525949	3.66719e-14
AEEREQIKTLNNK	K2C6C_HUMAN	P48668	R.AEEREQIKTLNNK.F	67.553	75	0.99312	1	0.525949	3.66719e-14
AEEREQIKTLNNK	K2C75_HUMAN	O95678	R.AEEREQIKTLNNK.F	20.145	22	0.99312	1	0.525949	3.66719e-14
AEEYEFLTPVEEAPK	GDIR1_HUMAN	P52565	R.AEEYEFLTPVEEAPK.G	15.686	2	0.99198	1	0.359772	4.35471e-14
AEFAEVSK	ALBU_HUMAN	Q9P157	K.AEFAEVSK.L	41.544	47	0.9934	1	1.39112	3.90625e-12
AEFAEVSKLVTDLTK	ALBU_HUMAN	Q9P157	K.AEFAEVSKLVTDLTK.V	41.544	47	0.98831	1	1.20675	2.50244e-20
AEGPEVDVNLPK	AHNK_HUMAN	Q09666	K.AEGPEVDVNLPK.A	19.508	36	0.99351	1	0.812619	4.88281e-17
AEIDNVKK	K2C5_HUMAN	P13647	R.AEIDNVKK.Q	65.932	71	0.98174	1	0.387437	1.5625e-11
AEIENIKK	K2C4_HUMAN	P19013	R.AEIENIKK.Q	74.532	75	0.99192	0.986309	0.827739	3.125e-11
AEILELAGNAAR	H2A1B_HUMAN	P04908	T.AEILELAGNAAR.D	57.692	14	0.99283	1	0.587693	9.86328e-15
AEILELAGNAAR	H2A1C_HUMAN	Q93077	T.AEILELAGNAAR.D	63.077	15	0.99283	1	0.587693	9.86328e-15
AEILELAGNAAR	H2A1D_HUMAN	P20671	T.AEILELAGNAAR.D	57.692	14	0.99283	1	0.587693	9.86328e-15
AEILELAGNAAR	H2A1H_HUMAN	Q96KK5	T.AEILELAGNAAR.D	64.062	15	0.99283	1	0.587693	9.86328e-15
AEILELAGNAAR	H2A1J_HUMAN	Q99878	T.AEILELAGNAAR.D	64.062	15	0.99283	1	0.587693	9.86328e-15
AEILELAGNAAR	H2A1_HUMAN	P0C0S8	T.AEILELAGNAAR.D	63.077	15	0.99283	1	0.587693	9.86328e-15
AEILELAGNAAR	H2A2A_HUMAN	Q6FI13	T.AEILELAGNAAR.D	63.077	16	0.99283	1	0.587693	9.86328e-15
AEILELAGNAAR	H2A2B_HUMAN	Q8IUE6	T.AEILELAGNAAR.D	49.231	12	0.99283	1	0.587693	9.86328e-15
AEILELAGNAAR	H2A2C_HUMAN	Q16777	T.AEILELAGNAAR.D	63.566	16	0.99283	1	0.587693	9.86328e-15
AEILELAGNAAR	H2A3_HUMAN	Q7L7L0	T.AEILELAGNAAR.D	57.692	14	0.99283	1	0.587693	9.86328e-15
AEILELAGNAAR	H2AJ_HUMAN	Q9BTM1	T.AEILELAGNAAR.D	63.566	15	0.99283	1	0.587693	9.86328e-15
AEILELAGNAAR	H2AX_HUMAN	P16104	T.AEILELAGNAAR.D	39.86	11	0.99283	1	0.587693	9.86328e-15
AEILELAGNAAR	H2AY_HUMAN	O75367	T.AEILELAGNAAR.D	5.914	9	0.99283	1	0.587693	9.86328e-15
AELIVQPELK	DESP_HUMAN	P15924	R.AELIVQPELK.Y	49.739	138	0.99319	1	0.664817	1.26378e-12
AELNEFLTR	RS3_HUMAN	P23396	K.AELNEFLTR.E	16.049	4	0.99378	1	1.23016	6.89649e-12
AEMDMVAWGVDLASVEQHINSHR	DESP_HUMAN	P15924	R.AEMDMVAWGVDLASVEQHINSHR.G	49.739	138	0.99432	1	1.04911	2.57091e-19
AENEFVTIKK	K2C1_HUMAN	P04264	N.AENEFVTIKK.D	66.77	58	0.99294	0.540205	0.203119	4.64653e-12
AENFFILR	ARPC4_HUMAN	P59998	R.AENFFILR.R	11.31	2	0.99381	1	1.60143	1.64063e-11
AENGKLVINGNPITIFQERDPSK	G3P_HUMAN	P04406	K.AENGKLVINGNPITIFQERDPSK.I	65.97	33	0.99348	1	1.23556	2.2755e-20
AENYPEVSIDQVGQVLTCSLETGLTCKN	MUC5B_HUMAN	Q7M4S5	R.AENYPEVSIDQVGQVLTCSLETGLTCKN.E	6.265	25	0.98945	1	0.398349	7.89832e-18
AFALWSAVTPLTFTR	MMP9_HUMAN	P14780	R.AFALWSAVTPLTFTR.V	7.638	4	0.99199	1	0.181082	9.05819e-17
AFAMIIDKLEEDINSSMTNSTAASRPPVTLR	PCBP1_HUMAN	Q15365	K.AFAMIIDKLEEDINSSMTNSTAASRPPVTLR.L	12.36	2	0.99302	1	1.1692	4.69316e-16
AFGFSHLEALLDDSKELQR	OTUB1_HUMAN	Q96FW1	R.AFGFSHLEALLDDSKELQR.F	10.701	2	0.99064	1	1.52743	1.00983e-16
AFHDNEETFLKK	ALBU_HUMAN	Q9P157	T.AFHDNEETFLKK.Y	41.544	47	0.99299	1	0.956947	1.05469e-15
AFHEQPELQK	CYTN_HUMAN	P01037	C.AFHEQPELQK.K	62.411	13	0.99422	1	1.39792	4.34508e-11
AFHEQPELQK	CYTS_HUMAN	P01036	C.AFHEQPELQK.K	60.993	15	0.99422	1	1.39792	4.34508e-11
AFHEQPELQK	CYTT_HUMAN	P09228	C.AFHEQPELQK.K	41.135	8	0.99422	1	1.39792	4.34508e-11
AFHEQPELQKK	CYTN_HUMAN	P01037	C.AFHEQPELQKK.Q	62.411	13	0.99331	1	0.71574	3.07564e-12
AFHEQPELQKK	CYTS_HUMAN	P01036	C.AFHEQPELQKK.Q	60.993	15	0.99331	1	0.71574	3.07564e-12
AFHEQPELQKK	CYTT_HUMAN	P09228	C.AFHEQPELQKK.Q	41.135	8	0.99331	1	0.71574	3.07564e-12
AFIGFEGVK	DESP_HUMAN	P15924	K.AFIGFEGVK.G	49.739	138	0.9931	1	1.07075	1.5625e-12
AFLASPEYV	GSTP1_HUMAN	P09211	K.AFLASPEYV.N	65.714	12	0.98644	1	1.18152	1.5625e-12
AFLTLAEDILR	RAB10_HUMAN	P61026	K.AFLTLAEDILR.K	17	4	0.99304	1	0.952243	7.8125e-15
AFMTADLPNELIELLEK	CLH1_HUMAN	Q00610	K.AFMTADLPNELIELLEK.I	10.627	13	0.99216	1	1.40724	1.45445e-19
AFMTADLPNELIELLEK	CLH2_HUMAN	P53675	K.AFMTADLPNELIELLEK.I	3.171	5	0.99216	1	1.40724	1.45445e-19
AFQPFFVELTMPYSVIR	A2MG_HUMAN	P01023	R.AFQPFFVELTMPYSVIR.G	24.763	26	0.99335	1	1.5234	8.22923e-19
AFQPFFVELTMPYSVIR	PZP_HUMAN	P20742	R.AFQPFFVELTMPYSVIR.G	3.914	5	0.99335	1	1.5234	8.22923e-19
AFTGIEDPVTK	EVPL_HUMAN	Q92817	K.AFTGIEDPVTK.K	19.97	31	0.99298	1	1.95206	4.7273e-14
AFYAELYHIISSNLEK	PSME2_HUMAN	Q9UL46	R.AFYAELYHIISSNLEK.I	18.828	3	0.99303	1	1.5392	1.14344e-17
AFYVNVLNEEQR	CATA_HUMAN	P04040	R.AFYVNVLNEEQR.K	7.78	3	0.99276	1	0.451601	1.38184e-15
AGAAPYVQAFDSLLAGPVAEYLK	CAP1_HUMAN	Q01518	K.AGAAPYVQAFDSLLAGPVAEYLK.I	14.316	5	0.99375	1	1.32102	4.20945e-23
AGAISASGPELQGAGHSK	AHNK_HUMAN	Q09666	R.AGAISASGPELQGAGHSK.L	19.508	36	0.99306	1	1.12817	8.00694e-17
AGALNLDITGQLR	BPIL1_HUMAN	Q8N4F0	K.AGALNLDITGQLR.S	41.266	14	0.99405	1	0.467503	4.00391e-17
AGALNSNDAFVLK	GELS_HUMAN	P06396	K.AGALNSNDAFVLK.T	20.077	11	0.99242	1	0.240542	2.09961e-16
AGALQNLTASK	PKP1_HUMAN	Q13835	C.AGALQNLTASK.G	30.254	18	0.99369	0.999999	0.545503	8.39414e-12
AGEYGAEALER	HBA_HUMAN	P69905	H.AGEYGAEALER.M	85.915	14	0.99198	0.710823	1.37874	1.37695e-12
AGFAGDDAPR	ACTA_HUMAN	P62736	K.AGFAGDDAPR.A	46.154	28	0.99341	1	0.726236	9.76563e-15
AGFAGDDAPR	ACTB_HUMAN	Q96HG5	K.AGFAGDDAPR.A	80.8	48	0.99341	1	0.726236	9.76563e-15
AGFAGDDAPR	ACTC_HUMAN	P68032	K.AGFAGDDAPR.A	48.806	32	0.99341	1	0.726236	9.76563e-15
AGFAGDDAPR	ACTG_HUMAN	P63261	K.AGFAGDDAPR.A	80.8	48	0.99341	1	0.726236	9.76563e-15
AGFAGDDAPR	ACTH_HUMAN	P63267	K.AGFAGDDAPR.A	46.277	28	0.99341	1	0.726236	9.76563e-15
AGFAGDDAPR	ACTS_HUMAN	P68133	K.AGFAGDDAPR.A	45.093	30	0.99341	1	0.726236	9.76563e-15
AGFAGDDAPR	POTEE_HUMAN	Q6S8J3	K.AGFAGDDAPR.A	12.186	18	0.99341	1	0.726236	9.76563e-15
AGFAGDDAPR	POTEF_HUMAN	A5A3E0	K.AGFAGDDAPR.A	10.512	17	0.99341	1	0.726236	9.76563e-15
AGKEPGLQIWR	GELS_HUMAN	P06396	K.AGKEPGLQIWR.V	20.077	11	0.99401	1	1.22814	8.41846e-15
AGLIDWNMFVK	PEPL_HUMAN	O60437	R.AGLIDWNMFVK.L	32.517	52	0.99374	1	0.616249	1.03613e-13
AGLLTEEIR	A2ML1_HUMAN	A8K2U0	K.AGLLTEEIR.S	27.854	29	0.99152	1	0.916791	1.5625e-12
AGLQADLEVAAQK	EVPL_HUMAN	Q92817	R.AGLQADLEVAAQK.V	19.97	31	0.99376	1	0.782282	8.00782e-16
AGLQFPVGR	H2A1A_HUMAN	Q96QV6	R.AGLQFPVGR.I	21.374	2	0.99399	0.991204	0.747623	7.8125e-13
AGLQFPVGR	H2A1B_HUMAN	P04908	R.AGLQFPVGR.V	57.692	14	0.99399	0.991204	0.747623	7.8125e-13
AGLQFPVGR	H2A1C_HUMAN	Q93077	R.AGLQFPVGR.V	63.077	15	0.99399	0.991204	0.747623	7.8125e-13
AGLQFPVGR	H2A1D_HUMAN	P20671	R.AGLQFPVGR.V	57.692	14	0.99399	0.991204	0.747623	7.8125e-13
AGLQFPVGR	H2A1H_HUMAN	Q96KK5	R.AGLQFPVGR.V	64.062	15	0.99399	0.991204	0.747623	7.8125e-13
AGLQFPVGR	H2A1J_HUMAN	Q99878	R.AGLQFPVGR.V	64.062	15	0.99399	0.991204	0.747623	7.8125e-13
AGLQFPVGR	H2A1_HUMAN	P0C0S8	R.AGLQFPVGR.V	63.077	15	0.99399	0.991204	0.747623	7.8125e-13
AGLQFPVGR	H2A2A_HUMAN	Q6FI13	R.AGLQFPVGR.V	63.077	16	0.99399	0.991204	0.747623	7.8125e-13
AGLQFPVGR	H2A2B_HUMAN	Q8IUE6	R.AGLQFPVGR.V	49.231	12	0.99399	0.991204	0.747623	7.8125e-13
AGLQFPVGR	H2A2C_HUMAN	Q16777	R.AGLQFPVGR.V	63.566	16	0.99399	0.991204	0.747623	7.8125e-13
AGLQFPVGR	H2A3_HUMAN	Q7L7L0	R.AGLQFPVGR.V	57.692	14	0.99399	0.991204	0.747623	7.8125e-13
AGLQFPVGR	H2AJ_HUMAN	Q9BTM1	R.AGLQFPVGR.V	63.566	15	0.99399	0.991204	0.747623	7.8125e-13
AGLQFPVGR	H2AV_HUMAN	Q71UI9	R.AGLQFPVGR.I	25	3	0.99399	0.991204	0.747623	7.8125e-13
AGLQFPVGR	H2AX_HUMAN	P16104	R.AGLQFPVGR.V	39.86	11	0.99399	0.991204	0.747623	7.8125e-13
AGLVYQEAGVLK	BPI_HUMAN	Q9H203	T.AGLVYQEAGVLK.M	10.062	4	0.99384	1	0.380848	1.10103e-12
AGNNMLLVGVHGPR	FLNA_HUMAN	P21333	K.AGNNMLLVGVHGPR.T	1.964	4	0.99345	1	1.02807	3.07185e-14
AGQAVDDFIEK	6PGD_HUMAN	P52209	K.AGQAVDDFIEK.L	41.615	17	0.99412	1	0.527033	8.00781e-14
AGTQIENIDEDFRDGLK	ACTN4_HUMAN	O43707	K.AGTQIENIDEDFRDGLK.L	42.371	27	0.99151	1	1.14916	6.31936e-12
AGVEEQEGLLSFQEDR	EVPL_HUMAN	Q92817	R.AGVEEQEGLLSFQEDR.S	19.97	31	0.99268	1	-0.103276	4.41895e-19
AGVNYFLDVELGR	CYTC_HUMAN	P01034	V.AGVNYFLDVELGR.T	34.247	7	0.99393	1	1.18189	7.33399e-15
AGYTDKVVIGMDV	ENOA_HUMAN	Q6GMP2	K.AGYTDKVVIGMDV.A	64.977	24	0.99278	1	0.674847	6.41455e-11
AGYTDKVVIGMDVAASEFFR	ENOA_HUMAN	Q6GMP2	K.AGYTDKVVIGMDVAASEFFR.S	64.977	24	0.99378	1	0.826687	4.31723e-19
AHFSISNSAEDPFIAI	AMY1_HUMAN	P04745	K.AHFSISNSAEDPFIAI.H	65.362	60	0.99315	1	0.422509	8.55466e-13
AHFSISNSAEDPFIAI	AMY2B_HUMAN	P19961	K.AHFSISNSAEDPFIAI.H	53.816	42	0.99315	1	0.422509	8.55466e-13
AHFSISNSAEDPFIAI	AMYP_HUMAN	P04746	K.AHFSISNSAEDPFIAI.H	45.597	37	0.99315	1	0.422509	8.55466e-13
AHFSISNSAEDPFIAIHAESK	AMY1_HUMAN	P04745	K.AHFSISNSAEDPFIAIHAESK.L	65.362	60	0.99412	1	0.791508	4.57764e-27
AHFSISNSAEDPFIAIHAESK	AMY2B_HUMAN	P19961	K.AHFSISNSAEDPFIAIHAESK.L	53.816	42	0.99412	1	0.791508	4.57764e-27
AHFSISNSAEDPFIAIHAESK	AMYP_HUMAN	P04746	K.AHFSISNSAEDPFIAIHAESK.L	45.597	37	0.99412	1	0.791508	4.57764e-27
AHFSISNSAEDPFIAIHAESKL	AMY1_HUMAN	P04745	K.AHFSISNSAEDPFIAIHAESKL.-	65.362	60	0.99252	1	0.715724	1.05562e-24
AHFSISNSAEDPFIAIHAESKL	AMY2B_HUMAN	P19961	K.AHFSISNSAEDPFIAIHAESKL.-	53.816	42	0.99252	1	0.715724	1.05562e-24
AHFSISNSAEDPFIAIHAESKL	AMYP_HUMAN	P04746	K.AHFSISNSAEDPFIAIHAESKL.-	45.597	37	0.99252	1	0.715724	1.05562e-24
AHQTGETVTGSGTQTQAGATQTVEQDSSHQTGR	CRNN_HUMAN	Q9UBG3	R.AHQTGETVTGSGTQTQAGATQTVEQDSSHQTGR.T	54.141	18	0.99325	1	1.18101	1.64362e-33
AHSSMVGVNLPQK	PGK1_HUMAN	P00558	R.AHSSMVGVNLPQK.A	42.926	14	0.9931	1	1.10009	4.88281e-18
AHYGGFTVQNEANK	FIBB_HUMAN	P02675	K.AHYGGFTVQNEANK.Y	26.477	10	0.99391	1	1.06762	2.01111e-19
AHYGGFTVQNEANKYQISVNK	FIBB_HUMAN	P02675	K.AHYGGFTVQNEANKYQISVNK.Y	26.477	10	0.99233	1	0.735016	3.4768e-22
AIAANEADAVTLDAGLVYDAYLAPNNLKPVVAEFYGSK	TRFE_HUMAN	P02787	R.AIAANEADAVTLDAGLVYDAYLAPNNLKPVVAEFYGSK.E	29.37	20	0.99293	1	0.717808	2.13102e-22
AIAEAIKK	FAM25_HUMAN	Q5VTM1	K.AIAEAIKK.A	64.045	3	0.74036	1	0.717963	3.20313e-11
AIAELGIYPAVDPLDSTSR	ATPB_HUMAN	P06576	R.AIAELGIYPAVDPLDSTSR.I	30.435	10	0.99311	1	0.462249	7.66885e-14
AIDGINQR	CAMP_HUMAN	P49913	R.AIDGINQR.S	9.412	2	0.99212	1	1.23799	3.125e-11
AIGGGLSSVGGGSSTI	K2C6A_HUMAN	P02538	R.AIGGGLSSVGGGSSTI.K	70.035	77	0.99351	1	0.791023	3.52173e-19
AIGGGLSSVGGGSSTI	K2C6C_HUMAN	P48668	R.AIGGGLSSVGGGSSTI.K	67.553	75	0.99351	1	0.791023	3.52173e-19
AIGGGLSSVGGGSSTIK	K2C6A_HUMAN	P02538	R.AIGGGLSSVGGGSSTIK.Y	70.035	77	0.99421	1	-0.0541898	6.10352e-23
AIGGGLSSVGGGSSTIK	K2C6C_HUMAN	P48668	R.AIGGGLSSVGGGSSTIK.Y	67.553	75	0.99421	1	-0.0541898	6.10352e-23
AIGGGLSSVGGGSSTIKYTTTSSSSR	K2C6A_HUMAN	P02538	R.AIGGGLSSVGGGSSTIKYTTTSSSSR.K	70.035	77	0.99299	1	-0.209374	8.82489e-28
AIGGGLSSVGGGSSTIKYTTTSSSSR	K2C6C_HUMAN	P48668	R.AIGGGLSSVGGGSSTIKYTTTSSSSR.K	67.553	75	0.99299	1	-0.209374	8.82489e-28
AIGTLIVTK	TGM1_HUMAN	P22735	K.AIGTLIVTK.A	26.683	16	0.98725	1	1.28103	1.5625e-12
AIGYLNTGYQR	A2MG_HUMAN	P01023	K.AIGYLNTGYQR.Q	24.763	26	0.99324	1	0.487472	4.49219e-15
AIHNPFRPWWER	AMY1_HUMAN	P04745	V.AIHNPFRPWWER.Y	65.362	60	0.99198	1	1.20537	4.12867e-14
AIHNPFRPWWER	AMY2B_HUMAN	P19961	V.AIHNPFRPWWER.Y	53.816	42	0.99198	1	1.20537	4.12867e-14
AIKEKEYEIER	DESP_HUMAN	P15924	K.AIKEKEYEIER.L	49.739	138	0.9928	1	1.01781	7.8125e-15
AILDKLHNLNSNWFPEGSKPFIYQEV	AMY1_HUMAN	P04745	K.AILDKLHNLNSNWFPEGSKPFIYQEV.I	65.362	60	0.9927	1	0.627061	1.1502e-19
AILDKLHNLNSNWFPEGSKPFIYQEVI	AMY1_HUMAN	P04745	K.AILDKLHNLNSNWFPEGSKPFIYQEVI.D	65.362	60	0.99284	1	0.679428	5.30469e-19
AILDKLHNLNSNWFPEGSKPFIYQEVIDLGGEPI	AMY1_HUMAN	P04745	K.AILDKLHNLNSNWFPEGSKPFIYQEVIDLGGEPI.K	65.362	60	0.99379	1	0.506648	3.66797e-17
AILDKLHNLNSNWFPEGSKPFIYQEVIDLGGEPIK	AMY1_HUMAN	P04745	K.AILDKLHNLNSNWFPEGSKPFIYQEVIDLGGEPIK.S	65.362	60	0.99325	1	0.093593	1.92597e-31
AILDKLHNLNSNWFPEGSKPFIYQEVIDLGGEPIKSSDYFGNGR	AMY1_HUMAN	P04745	K.AILDKLHNLNSNWFPEGSKPFIYQEVIDLGGEPIKSSDYFGNGR.V	65.362	60	0.99281	1	0.421515	7.02225e-34
AILEQNFR	TRI29_HUMAN	Q14134	K.AILEQNFR.D	14.116	8	0.99329	1	0.942771	3.125e-11
AILVDLEPGTMDSVR	TBB2A_HUMAN	Q13885	R.AILVDLEPGTMDSVR.S	42.247	18	0.99337	1	0.568481	9.68849e-16
AILVDLEPGTMDSVR	TBB3_HUMAN	Q13509	R.AILVDLEPGTMDSVR.S	26.889	12	0.99337	1	0.568481	9.68849e-16
AILVDLEPGTMDSVR	TBB5_HUMAN	P07437	R.AILVDLEPGTMDSVR.S	40.09	16	0.99337	1	0.568481	9.68849e-16
AIMTYVSSFYHAFSGAQK	ACTN1_HUMAN	P12814	K.AIMTYVSSFYHAFSGAQK.A	13.901	10	0.98874	1	1.09987	8.84647e-21
AIMTYVSSFYHAFSGAQK	ACTN4_HUMAN	O43707	K.AIMTYVSSFYHAFSGAQK.A	42.371	27	0.98874	1	1.09987	8.84647e-21
AINDPFIDLNYMVYMFQYDSTHGK	G3P_HUMAN	P04406	V.AINDPFIDLNYMVYMFQYDSTHGK.F	65.97	33	0.99169	1	0.274667	9.77937e-19
AINDPFIDLNYMVYMFQYDSTHGKFHGTVK	G3P_HUMAN	P04406	V.AINDPFIDLNYMVYMFQYDSTHGKFHGTVK.A	65.97	33	0.95276	1	1.29508	1.20475e-16
AIRHPQYNQR	CATG_HUMAN	P08311	R.AIRHPQYNQR.T	29.412	10	0.89551	1	0.207854	8.78882e-12
AISGGYGSR	K2C6A_HUMAN	P02538	C.AISGGYGSR.A	70.035	77	0.99242	1	0.32813	3.90625e-12
AISGGYGSR	K2C6B_HUMAN	P04259	C.AISGGYGSR.A	68.44	73	0.99242	1	0.32813	3.90625e-12
AISGGYGSR	K2C6C_HUMAN	P48668	C.AISGGYGSR.A	67.553	75	0.99242	1	0.32813	3.90625e-12
AITGFDDPFSGK	DESP_HUMAN	P15924	K.AITGFDDPFSGK.T	49.739	138	0.99391	1	0.63314	4.88281e-17
AITGILRPPLEQGR	PEPL_HUMAN	O60437	K.AITGILRPPLEQGR.A	32.517	52	0.99375	1	1.22996	2.34792e-13
AKFEELNMDLFR	GRP78_HUMAN	P11021	R.AKFEELNMDLFR.S	25.994	13	0.99226	1	1.84919	1.95313e-16
AKFYPEDVAEELIQDITQK	EZRI_HUMAN	P15311	R.AKFYPEDVAEELIQDITQK.L	26.28	13	0.99267	1	1.44075	4.64821e-24
AKFYPEDVSEELIQDITQR	MOES_HUMAN	P26038	R.AKFYPEDVSEELIQDITQR.L	15.598	8	0.99291	1	1.11538	1.87912e-17
AKHDELTY	CYTB_HUMAN	P04080	K.AKHDELTY.F	70.408	10	0.90128	1	1.3289	1.58223e-11
AKHDELTYF	CYTB_HUMAN	P04080	K.AKHDELTYF.-	70.408	10	0.99406	1	0.593746	6.3715e-11
AKLAEQAER	1433B_HUMAN	P31946	K.AKLAEQAER.Y	36.179	8	0.99175	1	-0.00285842	2.34375e-12
AKLAEQAER	1433E_HUMAN	P62258	Q.AKLAEQAER.Y	19.608	5	0.99175	1	-0.00285842	2.34375e-12
AKLAEQAER	1433S_HUMAN	P31947	K.AKLAEQAER.Y	64.919	17	0.99175	1	-0.00285842	2.34375e-12
AKLAEQAER	1433T_HUMAN	P27348	K.AKLAEQAER.Y	22.449	5	0.99175	1	-0.00285842	2.34375e-12
AKLAEQAER	1433Z_HUMAN	Q6NUR9	K.AKLAEQAER.Y	53.878	14	0.99175	1	-0.00285842	2.34375e-12
AKQIVWNGPVGVFEWEAFAR	PGK1_HUMAN	P00558	R.AKQIVWNGPVGVFEWEAFAR.G	42.926	14	0.99289	1	1.11181	1.04554e-18
AKVAVLGASGGIGQPLSLLLK	MDHM_HUMAN	P40926	N.AKVAVLGASGGIGQPLSLLLK.N	27.219	7	0.94834	1	1.62875	3.68265e-11
ALAAAGYDVEKNNSR	H11_HUMAN	Q02539	K.ALAAAGYDVEKNNSR.I	15.349	3	0.99226	1	1.33967	2.594e-19
ALAAAGYDVEKNNSR	H12_HUMAN	P16403	K.ALAAAGYDVEKNNSR.I	26.291	6	0.99226	1	1.33967	2.594e-19
ALAAAGYDVEKNNSR	H13_HUMAN	P16402	K.ALAAAGYDVEKNNSR.I	25.339	6	0.99226	1	1.33967	2.594e-19
ALAAAGYDVEKNNSR	H14_HUMAN	P10412	K.ALAAAGYDVEKNNSR.I	25.571	6	0.99226	1	1.33967	2.594e-19
ALAAAGYDVEKNNSR	H1T_HUMAN	P22492	K.ALAAAGYDVEKNNSR.I	11.594	2	0.99226	1	1.33967	2.594e-19
ALAAGGYDVEK	H15_HUMAN	P16401	K.ALAAGGYDVEK.N	24.336	6	0.99266	1	0.542952	9.76563e-16
ALAAGGYDVEKNNSR	H15_HUMAN	P16401	K.ALAAGGYDVEKNNSR.I	24.336	6	0.99155	1	1.51046	7.63231e-15
ALDFAISEYNK	CYTD_HUMAN	P28325	C.ALDFAISEYNK.V	53.521	6	0.9937	1	0.572689	1.95313e-14
ALDFAVGEYNK	CYTC_HUMAN	P01034	R.ALDFAVGEYNK.A	34.247	7	0.99372	1	0.547325	9.76563e-16
ALDFEQEMATAASSSSLEK	ACTB_HUMAN	Q96HG5	V.ALDFEQEMATAASSSSLEK.S	80.8	48	0.99388	1	1.17234	2.45187e-21
ALDFEQEMATAASSSSLEK	ACTG_HUMAN	P63261	V.ALDFEQEMATAASSSSLEK.S	80.8	48	0.99388	1	1.17234	2.45187e-21
ALDFEQEMATAASSSSLEK	POTEE_HUMAN	Q6S8J3	V.ALDFEQEMATAASSSSLEK.S	12.186	18	0.99388	1	1.17234	2.45187e-21
ALDFIASK	ACTN1_HUMAN	P12814	K.ALDFIASK.G	13.901	10	0.99331	1	1.03871	1.5625e-11
ALDFIASK	ACTN3_HUMAN	Q08043	K.ALDFIASK.G	2.442	2	0.99331	1	1.03871	1.5625e-11
ALDFIASK	ACTN4_HUMAN	O43707	K.ALDFIASK.G	42.371	27	0.99331	1	1.03871	1.5625e-11
ALDGINSGITHAGR	SBSN_HUMAN	Q6UWP8	K.ALDGINSGITHAGR.E	46.964	9	0.99331	1	1.01824	4.88281e-19
ALDLFSDNAPPPELLEIINEDIAKR	PDIA6_HUMAN	Q15084	R.ALDLFSDNAPPPELLEIINEDIAKR.T	11.818	3	0.99173	1	0.0996971	5.59813e-17
ALDYEQLQSVK	DSG3_HUMAN	P32926	K.ALDYEQLQSVK.L	9.61	7	0.99334	1	0.925997	7.8125e-15
ALEEANADLEVK	K1C13_HUMAN	P13646	R.ALEEANADLEVK.I	69.869	59	0.99398	1	0.010687	9.76563e-17
ALEEANADLEVK	K1C14_HUMAN	P02533	R.ALEEANADLEVK.I	60.593	45	0.99398	1	0.010687	9.76563e-17
ALEEANADLEVK	K1C15_HUMAN	P19012	R.ALEEANADLEVK.I	27.412	19	0.99398	1	0.010687	9.76563e-17
ALEEANADLEVK	K1C16_HUMAN	P08779	R.ALEEANADLEVK.I	72.304	50	0.99398	1	0.010687	9.76563e-17
ALEEANTELEVK	K1C17_HUMAN	Q8N1P6	R.ALEEANTELEVK.I	60.648	30	0.99417	0.959341	0.563853	9.76563e-17
ALEESNYELEGK	K1C10_HUMAN	P13645	R.ALEESNYELEGK.I	52.74	27	0.99357	1	0.0382431	9.76563e-17
ALEHFTDLYDIKR	CLH1_HUMAN	Q00610	R.ALEHFTDLYDIKR.A	10.627	13	0.83313	1	0.994116	1.79438e-12
ALELDSNLYR	MYH9_HUMAN	P35579	K.ALELDSNLYR.I	15.357	24	0.99333	1	0.841349	7.8125e-14
ALESGDVNTVWK	IQGA1_HUMAN	P46940	R.ALESGDVNTVWK.Q	8.69	9	0.99237	1	0.464385	1.0791e-15
ALESPERPFLAILGGAK	PGK1_HUMAN	P00558	K.ALESPERPFLAILGGAK.V	42.926	14	0.99292	1	1.13779	2.11385e-18
ALGFEAAESSLTK	LPLC1_HUMAN	Q9H4V6	K.ALGFEAAESSLTK.D	45.041	20	0.99412	1	0.985581	4.88281e-18
ALGISPFHEHAEVVFTANDSGPR	TTHY_HUMAN	P02766	K.ALGISPFHEHAEVVFTANDSGPR.R	43.537	3	0.99367	1	0.58681	7.80658e-19
ALGPEVANVAK	PIGR_HUMAN	P01833	C.ALGPEVANVAK.F	27.88	25	0.99362	1	0.680219	9.76563e-15
ALGQNPTNAEVLK	MYL6_HUMAN	P60660	R.ALGQNPTNAEVLK.V	40.397	5	0.99311	1	0.102015	1.20239e-17
ALHFAISEYNK	CYTN_HUMAN	P01037	R.ALHFAISEYNK.A	62.411	13	0.9941	1	0.723412	1.95313e-15
ALHFAISEYNK	CYTS_HUMAN	P01036	R.ALHFAISEYNK.A	60.993	15	0.9941	1	0.723412	1.95313e-15
ALHFAISEYNKATEDEYYR	CYTS_HUMAN	P01036	R.ALHFAISEYNKATEDEYYR.R	60.993	15	0.99319	1	1.11126	3.96729e-25
ALHFAISEYNKATEDEYYRRPLQVLR	CYTS_HUMAN	P01036	R.ALHFAISEYNKATEDEYYRRPLQVLR.A	60.993	15	0.99299	1	0.502007	1.04711e-18
ALHFVISEYNK	CYTT_HUMAN	P09228	R.ALHFVISEYNK.A	41.135	8	0.99406	1	0.663566	1.95313e-15
ALHVGFDNFEQLLSGAHWMDQHFR	G6PI_HUMAN	P06744	I.ALHVGFDNFEQLLSGAHWMDQHFR.T	38.351	14	0.91659	1	1.0985	7.08441e-16
ALIAAQYSGAQVR	EF1G_HUMAN	P26641	K.ALIAAQYSGAQVR.V	10.755	4	0.99324	1	0.588239	1.44571e-16
ALLAYAFALAGNQDK	A2MG_HUMAN	P01023	K.ALLAYAFALAGNQDK.R	24.763	26	0.99389	1	0.573099	6.57567e-18
ALLELQLEPEELYQTFQR	EF2_HUMAN	P13639	R.ALLELQLEPEELYQTFQR.I	33.566	23	0.99296	1	0.922156	1.12027e-20
ALLQAILQTEDMLK	DESP_HUMAN	P15924	R.ALLQAILQTEDMLK.V	49.739	138	0.99327	1	0.949949	1.17188e-17
ALLTLADGR	ANXA3_HUMAN	P12429	K.ALLTLADGR.R	31.579	8	0.97081	1	0.883112	1.5625e-12
ALMDEVVK	PGK1_HUMAN	P00558	K.ALMDEVVK.A	42.926	14	0.95628	1	0.775341	2.48828e-11
ALMGSPQLVAAVVR	PLAK_HUMAN	P14923	R.ALMGSPQLVAAVVR.T	42.55	30	0.99358	1	0.277573	6.53076e-19
ALNAQGLDVEKPLILTVK	DSG3_HUMAN	P32926	R.ALNAQGLDVEKPLILTVK.I	9.61	7	0.9931	1	0.809526	9.66511e-21
ALNSIIDVYHK	S10A8_HUMAN	P05109	K.ALNSIIDVYHK.Y	88.172	8	0.99382	1	0.777471	3.90625e-15
ALNSIIDVYHKYSLIK	S10A8_HUMAN	P05109	K.ALNSIIDVYHKYSLIK.G	88.172	8	0.98681	1	1.26292	5.84925e-18
ALNSMGQDLERPLELR	DSG1_HUMAN	Q02413	R.ALNSMGQDLERPLELR.V	15.253	10	0.99394	1	0.968089	6.93035e-13
ALPAPIEK	IGHG1_HUMAN	P01857	K.ALPAPIEK.T	34.848	16	0.99184	1	0.901019	1.5625e-11
ALPAPIEK	IGHG3_HUMAN	P01860	K.ALPAPIEK.T	22.546	13	0.99184	1	0.901019	1.5625e-11
ALPFWNEEIVPQIK	PGAM1_HUMAN	P18669	R.ALPFWNEEIVPQIK.E	42.913	9	0.99338	1	0.550953	1.79934e-16
ALPFWNEEIVPQIK	PGAM2_HUMAN	P15259	R.ALPFWNEEIVPQIK.A	16.206	4	0.99338	1	0.550953	1.79934e-16
ALPFWNEEIVPQIK	PGAM4_HUMAN	Q8N0Y7	R.ALPFWNEEIVPQIK.E	27.165	6	0.99338	1	0.550953	1.79934e-16
ALPGQLKPFET	GSTP1_HUMAN	P09211	K.ALPGQLKPFET.L	65.714	12	0.99228	1	0.865165	1.01852e-13
ALPGQLKPFETLLSQNQGGK	GSTP1_HUMAN	P09211	K.ALPGQLKPFETLLSQNQGGK.T	65.714	12	0.99422	1	0.564383	6.91826e-21
ALPLALVLHELGAGR	TYPH_HUMAN	P19971	R.ALPLALVLHELGAGR.S	8.506	2	0.99312	1	1.1951	7.77121e-13
ALQASALK	ALDOA_HUMAN	P04075	R.ALQASALK.A	34.341	13	0.99062	0.999938	1.3828	3.125e-11
ALQVTVPHFLDWSGEALQPT	BPIL1_HUMAN	Q8N4F0	R.ALQVTVPHFLDWSGEALQPT.R	41.266	14	0.99411	1	0.544852	1.13978e-11
ALQVTVPHFLDWSGEALQPTR	BPIL1_HUMAN	Q8N4F0	R.ALQVTVPHFLDWSGEALQPTR.I	41.266	14	0.99414	1	1.74315	9.93405e-26
ALTGHLEEV	ANXA1_HUMAN	P04083	K.ALTGHLEEV.V	67.052	42	0.8887	1	0.864705	7.8125e-13
ALTGHLEEVV	ANXA1_HUMAN	P04083	K.ALTGHLEEVV.L	67.052	42	0.99289	1	0.809983	6.58447e-12
ALTGHLEEVVLALLK	ANXA1_HUMAN	P04083	K.ALTGHLEEVVLALLK.T	67.052	42	0.99144	1	0.892364	9.76563e-20
ALTVPELTQQMFDAK	TBB3_HUMAN	Q13509	R.ALTVPELTQQMFDAK.N	26.889	12	0.99305	1	0.751274	2.44873e-16
ALTVPELTQQMFDSK	TBB2A_HUMAN	Q13885	R.ALTVPELTQQMFDSK.N	42.247	18	0.99321	1	0.823913	3.10005e-14
ALTVPELTQQVFDAK	TBB5_HUMAN	P07437	R.ALTVPELTQQVFDAK.N	40.09	16	0.99284	1	0.383992	1.66133e-15
ALVFVDNHDNQR	AMY1_HUMAN	P04745	R.ALVFVDNHDNQR.G	65.362	60	0.99424	1	0.554568	9.76563e-17
ALVFVDNHDNQR	AMY2B_HUMAN	P19961	R.ALVFVDNHDNQR.G	53.816	42	0.99424	1	0.554568	9.76563e-17
ALVFVDNHDNQR	AMYP_HUMAN	P04746	R.ALVFVDNHDNQR.G	45.597	37	0.99424	1	0.554568	9.76563e-17
ALVLIAFA	ALBU_HUMAN	Q9P157	K.ALVLIAFA.Q	41.544	47	0.96763	1	0.561903	3.125e-11
ALYDAELSQMQTHISDTSV	K2C6A_HUMAN	P02538	R.ALYDAELSQMQTHISDTSV.V	70.035	77	0.99265	1	0.825722	3.25675e-17
ALYDAELSQMQTHISDTSV	K2C6B_HUMAN	P04259	R.ALYDAELSQMQTHISDTSV.V	68.44	73	0.99265	1	0.825722	3.25675e-17
ALYDAELSQMQTHISDTSV	K2C6C_HUMAN	P48668	R.ALYDAELSQMQTHISDTSV.V	67.553	75	0.99265	1	0.825722	3.25675e-17
ALYDAELSQMQTHISDTSVV	K2C6A_HUMAN	P02538	R.ALYDAELSQMQTHISDTSVV.L	70.035	77	0.99098	1	0.304389	4.83748e-15
ALYDAELSQMQTHISDTSVV	K2C6B_HUMAN	P04259	R.ALYDAELSQMQTHISDTSVV.L	68.44	73	0.99098	1	0.304389	4.83748e-15
ALYDAELSQMQTHISDTSVV	K2C6C_HUMAN	P48668	R.ALYDAELSQMQTHISDTSVV.L	67.553	75	0.99098	1	0.304389	4.83748e-15
ALYDAELSQMQTHISDTSVVLSMDNNR	K2C6A_HUMAN	P02538	R.ALYDAELSQMQTHISDTSVVLSMDNNR.N	70.035	77	0.9925	1	-0.173832	3.37137e-24
ALYDAELSQMQTHISDTSVVLSMDNNR	K2C6B_HUMAN	P04259	R.ALYDAELSQMQTHISDTSVVLSMDNNR.N	68.44	73	0.9925	1	-0.173832	3.37137e-24
ALYDAELSQMQTHISDTSVVLSMDNNR	K2C6C_HUMAN	P48668	R.ALYDAELSQMQTHISDTSVVLSMDNNR.N	67.553	75	0.9925	1	-0.173832	3.37137e-24
ALYEAGER	ANXA1_HUMAN	P04083	R.ALYEAGER.R	67.052	42	0.99394	1	0.947721	7.8125e-12
ALYEAGERR	ANXA1_HUMAN	P04083	R.ALYEAGERR.K	67.052	42	0.97982	1	0.694849	3.49024e-12
AMGIMNSFVNDIFER	H2B1B_HUMAN	P33778	K.AMGIMNSFVNDIFER.I	38.889	11	0.99406	1	0.295959	1.2207e-20
AMGIMNSFVNDIFER	H2B1C_HUMAN	P62807	K.AMGIMNSFVNDIFER.I	38.889	11	0.99406	1	0.295959	1.2207e-20
AMGIMNSFVNDIFER	H2B1D_HUMAN	P58876	K.AMGIMNSFVNDIFER.I	38.889	11	0.99406	1	0.295959	1.2207e-20
AMGIMNSFVNDIFER	H2B1H_HUMAN	Q93079	K.AMGIMNSFVNDIFER.I	38.889	11	0.99406	1	0.295959	1.2207e-20
AMGIMNSFVNDIFER	H2B1J_HUMAN	P06899	K.AMGIMNSFVNDIFER.I	31.746	10	0.99406	1	0.295959	1.2207e-20
AMGIMNSFVNDIFER	H2B1K_HUMAN	O60814	K.AMGIMNSFVNDIFER.I	31.746	10	0.99406	1	0.295959	1.2207e-20
AMGIMNSFVNDIFER	H2B1L_HUMAN	Q99880	K.AMGIMNSFVNDIFER.I	38.889	11	0.99406	1	0.295959	1.2207e-20
AMGIMNSFVNDIFER	H2B1M_HUMAN	Q99879	K.AMGIMNSFVNDIFER.I	38.889	11	0.99406	1	0.295959	1.2207e-20
AMGIMNSFVNDIFER	H2B1N_HUMAN	Q99877	K.AMGIMNSFVNDIFER.I	38.889	11	0.99406	1	0.295959	1.2207e-20
AMGIMNSFVNDIFER	H2B1O_HUMAN	P23527	K.AMGIMNSFVNDIFER.I	38.889	11	0.99406	1	0.295959	1.2207e-20
AMGIMNSFVNDIFER	H2B2E_HUMAN	Q16778	K.AMGIMNSFVNDIFER.I	38.889	11	0.99406	1	0.295959	1.2207e-20
AMGIMNSFVNDIFER	H2B2F_HUMAN	Q5QNW6	K.AMGIMNSFVNDIFER.I	38.889	11	0.99406	1	0.295959	1.2207e-20
AMGIMNSFVNDIFER	H2B3B_HUMAN	Q8N257	K.AMGIMNSFVNDIFER.I	38.889	11	0.99406	1	0.295959	1.2207e-20
AMGIMNSFVNDIFER	H2BFS_HUMAN	P57053	K.AMGIMNSFVNDIFER.I	31.746	10	0.99406	1	0.295959	1.2207e-20
AMGIMNSFVNDIFERI	H2B1B_HUMAN	P33778	K.AMGIMNSFVNDIFERI.A	38.889	11	0.99263	1	0.773104	3.09342e-19
AMGIMNSFVNDIFERI	H2B1C_HUMAN	P62807	K.AMGIMNSFVNDIFERI.A	38.889	11	0.99263	1	0.773104	3.09342e-19
AMGIMNSFVNDIFERI	H2B1D_HUMAN	P58876	K.AMGIMNSFVNDIFERI.A	38.889	11	0.99263	1	0.773104	3.09342e-19
AMGIMNSFVNDIFERI	H2B1H_HUMAN	Q93079	K.AMGIMNSFVNDIFERI.A	38.889	11	0.99263	1	0.773104	3.09342e-19
AMGIMNSFVNDIFERI	H2B1J_HUMAN	P06899	K.AMGIMNSFVNDIFERI.A	31.746	10	0.99263	1	0.773104	3.09342e-19
AMGIMNSFVNDIFERI	H2B1K_HUMAN	O60814	K.AMGIMNSFVNDIFERI.A	31.746	10	0.99263	1	0.773104	3.09342e-19
AMGIMNSFVNDIFERI	H2B1L_HUMAN	Q99880	K.AMGIMNSFVNDIFERI.A	38.889	11	0.99263	1	0.773104	3.09342e-19
AMGIMNSFVNDIFERI	H2B1M_HUMAN	Q99879	K.AMGIMNSFVNDIFERI.A	38.889	11	0.99263	1	0.773104	3.09342e-19
AMGIMNSFVNDIFERI	H2B1N_HUMAN	Q99877	K.AMGIMNSFVNDIFERI.A	38.889	11	0.99263	1	0.773104	3.09342e-19
AMGIMNSFVNDIFERI	H2B1O_HUMAN	P23527	K.AMGIMNSFVNDIFERI.A	38.889	11	0.99263	1	0.773104	3.09342e-19
AMGIMNSFVNDIFERI	H2B2E_HUMAN	Q16778	K.AMGIMNSFVNDIFERI.A	38.889	11	0.99263	1	0.773104	3.09342e-19
AMGIMNSFVNDIFERI	H2B2F_HUMAN	Q5QNW6	K.AMGIMNSFVNDIFERI.A	38.889	11	0.99263	1	0.773104	3.09342e-19
AMGIMNSFVNDIFERI	H2B3B_HUMAN	Q8N257	K.AMGIMNSFVNDIFERI.A	38.889	11	0.99263	1	0.773104	3.09342e-19
AMGIMNSFVNDIFERI	H2BFS_HUMAN	P57053	K.AMGIMNSFVNDIFERI.A	31.746	10	0.99263	1	0.773104	3.09342e-19
AMTVDREFPEMNLESVTPMTLTTLEGGNLEAK	LCN1_HUMAN	P31025	K.AMTVDREFPEMNLESVTPMTLTTLEGGNLEAK.V	76.136	13	0.99193	1	1.42288	1.05393e-21
ANDDIIVNWVNR	PLST_HUMAN	P13797	K.ANDDIIVNWVNR.T	16.984	8	0.99371	1	1.05903	9.65651e-15
ANDTTFGLAAGVFTR	AL9A1_HUMAN	P49189	R.ANDTTFGLAAGVFTR.D	5.466	2	0.9936	1	0.418635	1.86764e-15
ANLQIDQINTDLNLER	MYH9_HUMAN	P35579	K.ANLQIDQINTDLNLER.S	15.357	24	0.99094	1	0.197276	7.8125e-20
ANNHQQQQGLQDSSSK	POF1B_HUMAN	Q8WVV4	R.ANNHQQQQGLQDSSSK.C	13.752	6	0.99233	1	0.497736	7.79223e-19
ANPETLTITVTSR	CLCA4_HUMAN	Q14CN2	K.ANPETLTITVTSR.A	2.612	2	0.99365	1	0.723669	6.82524e-14
ANSSATETINK	DESP_HUMAN	P15924	K.ANSSATETINK.L	49.739	138	0.99253	1	0.157066	3.2251e-15
ANSSATETINKLK	DESP_HUMAN	P15924	K.ANSSATETINKLK.V	49.739	138	0.99252	1	0.871319	9.02886e-14
ANTFVAELK	MDHM_HUMAN	P40926	R.ANTFVAELK.G	27.219	7	0.99243	1	1.47448	1.5625e-12
ANTLDNQLTNR	SCEL_HUMAN	O95171	K.ANTLDNQLTNR.S	22.384	13	0.9926	1	1.69391	8.39649e-14
APDFVFYAPR	EZRI_HUMAN	P15311	K.APDFVFYAPR.L	26.28	13	0.99421	1	0.681795	9.76563e-15
APDFVFYAPR	MOES_HUMAN	P26038	K.APDFVFYAPR.L	15.598	8	0.99421	1	0.681795	9.76563e-15
APDFVFYAPR	RADI_HUMAN	P35241	K.APDFVFYAPR.L	6.69	4	0.99421	1	0.681795	9.76563e-15
APEPLELTLPVELLADTR	BPIL1_HUMAN	Q8N4F0	R.APEPLELTLPVELLADTR.V	41.266	14	0.99204	1	1.58784	3.90625e-22
APIKVGDAIPAVEVFEGEPGNKVNLAELFK	PRDX5_HUMAN	P30044	M.APIKVGDAIPAVEVFEGEPGNKVNLAELFK.G	39.252	7	0.99012	1	1.07106	8.09832e-19
APLSRPTPLEDLEGR	EVPL_HUMAN	Q92817	R.APLSRPTPLEDLEGR.I	19.97	31	0.99356	1	0.741148	2.50042e-16
APNHAVVTR	TRFE_HUMAN	P02787	R.APNHAVVTR.K	29.37	20	0.9932	1	0.153395	1.95313e-13
APNHAVVTRK	TRFE_HUMAN	P02787	R.APNHAVVTRK.D	29.37	20	0.99277	1	1.95343	9.76563e-15
APNISMPDVDLNLKGPK	AHNK_HUMAN	Q09666	K.APNISMPDVDLNLKGPK.I	19.508	36	0.99341	1	1.07182	1.47956e-18
APNVVVTR	GDIR2_HUMAN	P52566	K.APNVVVTR.L	23.383	4	0.99314	1	1.24295	3.90625e-12
APPGKPQGPPQQEGNNPQ	PRP1_HUMAN	P04280	R.APPGKPQGPPQQEGNNPQ.G	53.571	12	0.99269	1	0.440951	1.97119e-19
APPQPFGPGFVPPPPPPPYGPGR	SMR3B_HUMAN	P02814	L.APPQPFGPGFVPPPPPPPYGPGR.I	67.089	19	0.99308	1	0.582165	2.42063e-25
APSTYGGGLSV	K1C14_HUMAN	P02533	R.APSTYGGGLSV.S	60.593	45	0.94493	1	0.804572	2.12671e-14
APSTYGGGLSV	K1C16_HUMAN	P08779	R.APSTYGGGLSV.S	72.304	50	0.94493	1	0.804572	2.12671e-14
APSTYGGGLSVSSR	K1C16_HUMAN	P08779	R.APSTYGGGLSVSSR.F	72.304	50	0.99393	1	-0.0273613	1.2207e-19
APSTYGGGLSVSSSR	K1C14_HUMAN	P02533	R.APSTYGGGLSVSSSR.F	60.593	45	0.99358	1	0.161579	6.10352e-21
APSWFDTGLSEMR	CRYAB_HUMAN	P02511	R.APSWFDTGLSEMR.L	42.857	5	0.99333	1	1.12036	2.44141e-18
AQAQPGVPLGELGQVVECSLDFGLVCRN	MUC5B_HUMAN	Q7M4S5	R.AQAQPGVPLGELGQVVECSLDFGLVCRN.R	6.265	25	0.993	1	0.517451	3.84234e-16
AQAQPGVPLR	MUC5B_HUMAN	Q7M4S5	R.AQAQPGVPLR.E	6.265	25	0.99266	1	1.03565	7.8125e-14
AQAQPGVPLRELGQVVECSLDFGLVCRN	MUC5B_HUMAN	Q7M4S5	R.AQAQPGVPLRELGQVVECSLDFGLVCRN.R	6.265	25	0.99212	1	0.824216	1.15858e-15
AQEAEKLLNNVISK	SPLC2_HUMAN	Q96DR5	K.AQEAEKLLNNVISK.L	49.799	15	0.99318	1	1.97486	1.95313e-18
AQFVNWIDSIIQR	ELNE_HUMAN	P08246	V.AQFVNWIDSIIQR.S	28.464	9	0.99303	1	1.37421	8.98487e-16
AQHEDQVEQYKK	LMNA_HUMAN	P02545	R.AQHEDQVEQYKK.E	24.096	14	0.99084	1	0.146832	2.32711e-15
AQIDNLTR	DESP_HUMAN	P15924	R.AQIDNLTR.E	49.739	138	0.99221	1	1.37656	3.125e-11
AQIHDLVLVGGSTR	HSP71_HUMAN	P08107	K.AQIHDLVLVGGSTR.I	43.058	20	0.9936	1	0.675175	1.95313e-18
AQLGGPEAAK	HSPB1_HUMAN	Q9UC36	R.AQLGGPEAAK.S	94.146	23	0.993	1	0.747051	3.90625e-14
AQLGGPEAAKSDETAAK	HSPB1_HUMAN	Q9UC36	R.AQLGGPEAAKSDETAAK.-	94.146	23	0.99343	1	0.62679	2.98805e-22
AQLNELVNSHGR	EVPL_HUMAN	Q92817	K.AQLNELVNSHGR.S	19.97	31	0.99354	1	0.726125	2.08948e-15
AQPVQVAEGSEPDGFWEALGGK	GELS_HUMAN	P06396	R.AQPVQVAEGSEPDGFWEALGGK.A	20.077	11	0.9935	1	0.245742	1.74865e-21
AQQIHSQTSQQYPLYDLDLGK	DESP_HUMAN	P15924	K.AQQIHSQTSQQYPLYDLDLGK.F	49.739	138	0.99299	1	0.147151	6.28012e-21
AQQIHSQTSQQYPLYDLDLGKFGEK	DESP_HUMAN	P15924	K.AQQIHSQTSQQYPLYDLDLGKFGEK.V	49.739	138	0.99351	1	0.797809	2.09939e-20
AQYEDIAQK	K2C1_HUMAN	P04264	K.AQYEDIAQK.S	66.77	58	0.99372	1	0.928875	1.5625e-12
AQYEEIANR	K2C5_HUMAN	P13647	K.AQYEEIANR.S	65.932	71	0.99433	0.999773	1.2332	7.8125e-13
AQYEEIAQR	K22E_HUMAN	P35908	K.AQYEEIAQR.S	40.845	30	0.99333	1	1.03295	1.5625e-12
AQYEEIAQR	K2C4_HUMAN	P19013	R.AQYEEIAQR.S	74.532	75	0.99333	1	1.03295	1.5625e-12
AQYEEIAQR	K2C6A_HUMAN	P02538	K.AQYEEIAQR.S	70.035	77	0.99333	1	1.03295	1.5625e-12
AQYEEIAQR	K2C6B_HUMAN	P04259	K.AQYEEIAQR.S	68.44	73	0.99333	1	1.03295	1.5625e-12
AQYEEIAQR	K2C6C_HUMAN	P48668	K.AQYEEIAQR.S	67.553	75	0.99333	1	1.03295	1.5625e-12
AREDIFMETLK	ZA2G_HUMAN	P25311	K.AREDIFMETLK.D	43.96	13	0.994	1	0.711929	1.25299e-12
AREQTFGGVNYFFDVEVGR	CYTS_HUMAN	P01036	R.AREQTFGGVNYFFDVEVGR.T	60.993	15	0.99328	1	0.716514	3.18496e-23
ARFEELNADLFR	HSP72_HUMAN	P54652	R.ARFEELNADLFR.G	17.84	11	0.99305	1	1.34232	4.0625e-16
ARFEELNADLFR	HSP7C_HUMAN	P11142	R.ARFEELNADLFR.G	39.783	24	0.99305	1	1.34232	4.0625e-16
ARPFPDGLAEDIDKGEVSAR	EF2_HUMAN	P13639	K.ARPFPDGLAEDIDKGEVSAR.Q	33.566	23	0.99304	1	1.25649	1.41494e-20
ARPHAWPFMV	ELNE_HUMAN	P08246	R.ARPHAWPFMV.S	28.464	9	0.99257	1	0.721869	5.82994e-12
ARQQTVGGVNYFFDVEVGR	CYTN_HUMAN	P01037	R.ARQQTVGGVNYFFDVEVGR.T	62.411	13	0.99269	1	0.582374	1.77007e-21
ASEHILLATSHTLFLR	PERL_HUMAN	P22079	R.ASEHILLATSHTLFLR.E	32.865	16	0.99372	1	0.887779	4.88281e-21
ASFNHFDKDHGGALGPEEFK	ACTN4_HUMAN	O43707	R.ASFNHFDKDHGGALGPEEFK.A	42.371	27	0.99311	1	1.23832	2.13831e-18
ASGPPVSELITK	H12_HUMAN	P16403	K.ASGPPVSELITK.A	26.291	6	0.9935	1	1.21696	2.44141e-16
ASGPPVSELITK	H13_HUMAN	P16402	K.ASGPPVSELITK.A	25.339	6	0.9935	1	1.21696	2.44141e-16
ASGPPVSELITK	H14_HUMAN	P10412	K.ASGPPVSELITK.A	25.571	6	0.9935	1	1.21696	2.44141e-16
ASGVPDRFSGSGSGTDFTLK	KV201_HUMAN	P01614	R.ASGVPDRFSGSGSGTDFTLK.I	17.391	2	0.99379	1	0.481423	3.34436e-19
ASGVPDRFSGSGSGTDFTLK	KV204_HUMAN	P01617	R.ASGVPDRFSGSGSGTDFTLK.I	17.699	2	0.99379	1	0.481423	3.34436e-19
ASGVPDRFSGSGSGTDFTLK	KV205_HUMAN	P06309	R.ASGVPDRFSGSGSGTDFTLK.I	17.094	2	0.99379	1	0.481423	3.34436e-19
ASHEEVEGLVEK	LG3BP_HUMAN	Q08380	R.ASHEEVEGLVEK.I	23.077	11	0.99368	1	0.720252	4.88281e-17
ASLEGNLAETENR	K1C17_HUMAN	Q8N1P6	K.ASLEGNLAETENR.Y	60.648	30	0.99422	1	0.219225	4.88281e-18
ASLENSLEETK	K1C14_HUMAN	P02533	K.ASLENSLEETK.G	60.593	45	0.99391	1	0.266646	1.95313e-15
ASLENSLEETK	K1C16_HUMAN	P08779	K.ASLENSLEETK.G	72.304	50	0.99391	1	0.266646	1.95313e-15
ASLENSLEETKGR	K1C14_HUMAN	P02533	K.ASLENSLEETKGR.Y	60.593	45	0.99352	1	0.808604	9.76563e-18
ASLENSLEETKGR	K1C16_HUMAN	P08779	K.ASLENSLEETKGR.Y	72.304	50	0.99352	1	0.808604	9.76563e-18
ASNDMYHSR	CYTC_HUMAN	P01034	K.ASNDMYHSR.A	34.247	7	0.98527	1	0.401688	1.95313e-13
ASQSVSSSYLAWYQQKPGQAPR	KV303_HUMAN	P01621	R.ASQSVSSSYLAWYQQKPGQAPR.L	40	2	0.9927	1	0.971947	1.23479e-22
ASQSVSSSYLAWYQQKPGQAPR	KV312_HUMAN	P18135	R.ASQSVSSSYLAWYQQKPGQAPR.L	50.388	5	0.9927	1	0.971947	1.23479e-22
ASQSVSSSYLAWYQQKPGQAPR	KV313_HUMAN	P18136	R.ASQSVSSSYLAWYQQKPGQAPR.L	50.388	5	0.9927	1	0.971947	1.23479e-22
ASSIIDELFQDR	CLUS_HUMAN	P10909	R.ASSIIDELFQDR.F	18.931	6	0.99317	1	1.11568	3.90625e-16
ASSLESGVPSR	KV106_HUMAN	P01598	K.ASSLESGVPSR.F	26.852	2	0.99183	1	1.49612	4.43848e-13
ASSLESGVPSR	KV110_HUMAN	P01602	D.ASSLESGVPSR.F	24.786	2	0.99183	1	1.49612	4.43848e-13
ASTPNGYDNGIIWATWK	FIBG_HUMAN	Q9UC63	K.ASTPNGYDNGIIWATWK.T	20.971	7	0.99308	1	-0.13651	2.00484e-20
ASVDSGSSEEQGGSSR	PIGR_HUMAN	P01833	R.ASVDSGSSEEQGGSSR.A	27.88	25	0.9873	1	-0.167225	3.05176e-22
ATAGDTHLGGEDFDNRLV	HS71L_HUMAN	P34931	K.ATAGDTHLGGEDFDNRLV.S	17.941	9	0.99327	1	0.669519	3.72043e-15
ATAGDTHLGGEDFDNRLV	HSP71_HUMAN	P08107	K.ATAGDTHLGGEDFDNRLV.N	43.058	20	0.99327	1	0.669519	3.72043e-15
ATAGDTHLGGEDFDNRLV	HSP76_HUMAN	P17066	K.ATAGDTHLGGEDFDNRLV.N	12.442	7	0.99327	1	0.669519	3.72043e-15
ATAVMPDGQFKDISLSDYK	PRDX1_HUMAN	Q06830	K.ATAVMPDGQFKDISLSDYK.G	48.744	12	0.99386	1	0.556592	6.61026e-21
ATAVVDGAFK	PRDX2_HUMAN	P32119	K.ATAVVDGAFK.E	25.253	5	0.99181	1	0.582496	4.58984e-13
ATAVVDGAFKEVK	PRDX2_HUMAN	P32119	K.ATAVVDGAFKEVK.L	25.253	5	0.82899	1	0.616844	2.48802e-11
ATEDEYYR	CYTS_HUMAN	P01036	K.ATEDEYYR.R	60.993	15	0.99348	1	0.898573	3.90625e-12
ATEDEYYR	CYTT_HUMAN	P09228	K.ATEDEYYR.R	41.135	8	0.99348	1	0.898573	3.90625e-12
ATEDEYYRR	CYTS_HUMAN	P01036	K.ATEDEYYRR.P	60.993	15	0.97442	1	0.642095	4.31445e-12
ATEDEYYRR	CYTT_HUMAN	P09228	K.ATEDEYYRR.L	41.135	8	0.97442	1	0.642095	4.31445e-12
ATEDEYYRRPLQVLR	CYTS_HUMAN	P01036	K.ATEDEYYRRPLQVLR.A	60.993	15	0.91595	1	0.710959	2.3124e-12
ATEGAIHAVEEVVKEVVGHAK	FAM25_HUMAN	Q5VTM1	K.ATEGAIHAVEEVVKEVVGHAK.E	64.045	3	0.98801	1	1.31478	1.31399e-24
ATEHLSTLSEK	APOA1_HUMAN	P02647	K.ATEHLSTLSEK.A	63.296	16	0.99282	1	1.22664	1.95313e-15
ATFLDAWEAMEELVDEGLVK	AK1BA_HUMAN	O60218	K.ATFLDAWEAMEELVDEGLVK.A	24.367	6	0.99306	1	0.909634	9.58734e-22
ATFMVGSYGPRPEEYEFLTPVEEAPK	GDIR2_HUMAN	P52566	K.ATFMVGSYGPRPEEYEFLTPVEEAPK.G	23.383	4	0.99312	1	0.178161	1.93978e-20
ATGGGLSSVGGGSSTI	K2C6B_HUMAN	P04259	R.ATGGGLSSVGGGSSTI.K	68.44	73	0.99334	1	0.65948	1.53267e-16
ATGGGLSSVGGGSSTIK	K2C6B_HUMAN	P04259	R.ATGGGLSSVGGGSSTIK.Y	68.44	73	0.99287	1	0.0224432	3.05176e-23
ATGPPVSELITK	H15_HUMAN	P16401	K.ATGPPVSELITK.A	24.336	6	0.983	1	1.32313	1.38678e-13
ATIGADFLTK	RAB7A_HUMAN	P51149	K.ATIGADFLTK.E	16.425	3	0.98193	1	1.28568	5.73062e-12
ATKDDYYR	CYTN_HUMAN	P01037	K.ATKDDYYR.R	62.411	13	0.99162	1	-0.0671537	7.8125e-12
ATLENDFVVLK	K2C78_HUMAN	Q8N1N4	R.ATLENDFVVLK.K	44.038	31	0.99368	1	1.03328	3.48157e-15
ATLENDFVVLKK	K2C78_HUMAN	Q8N1N4	R.ATLENDFVVLKK.D	44.038	31	0.99344	1	0.82114	1.95313e-16
ATMQNLNDR	K1C17_HUMAN	Q8N1P6	K.ATMQNLNDR.L	60.648	30	0.99428	1	0.896474	7.8125e-13
ATNYNAGDR	LYSC_HUMAN	P61626	R.ATNYNAGDR.S	27.027	9	0.99427	1	1.85255	1.95313e-13
ATNYNAGDRSTDYGIFQINSR	LYSC_HUMAN	P61626	R.ATNYNAGDRSTDYGIFQINSR.Y	27.027	9	0.99043	1	-0.297363	6.53379e-21
ATQALVLAPTR	IF4A1_HUMAN	P60842	K.ATQALVLAPTR.E	21.429	7	0.9938	1	0.912109	9.71088e-11
ATSIVAWLAK	A2ML1_HUMAN	A8K2U0	K.ATSIVAWLAK.Q	27.854	29	0.99363	1	1.27752	3.90625e-14
ATVLNYLPK	A2MG_HUMAN	P01023	K.ATVLNYLPK.C	24.763	26	0.99275	1	1.20982	7.8125e-13
ATVLNYLPK	PZP_HUMAN	P20742	K.ATVLNYLPK.C	3.914	5	0.99275	1	1.20982	7.8125e-13
AVADTRDQADGSR	PIGR_HUMAN	P01833	K.AVADTRDQADGSR.A	27.88	25	0.9913	1	1.7242	8.86691e-14
AVDESVLLLRPDR	A2ML1_HUMAN	A8K2U0	R.AVDESVLLLRPDR.E	27.854	29	0.99366	1	1.4136	1.78545e-13
AVDTWSWGER	LG3BP_HUMAN	Q08380	K.AVDTWSWGER.A	23.077	11	0.99361	1	0.813407	1.39648e-14
AVELAANTK	TKT_HUMAN	P29401	K.AVELAANTK.G	30.337	13	0.99275	1	1.27984	3.90625e-13
AVETAAAHGSKPNVYANR	TGM1_HUMAN	P22735	K.AVETAAAHGSKPNVYANR.G	26.683	16	0.99342	1	0.98893	1.56561e-18
AVEVQGPSLESGDHGK	AHNK_HUMAN	Q09666	R.AVEVQGPSLESGDHGK.I	19.508	36	0.9937	1	0.898013	2.34072e-12
AVFPSIVGR	ACTA_HUMAN	P62736	R.AVFPSIVGR.P	46.154	28	0.9941	1	1.05776	3.90625e-13
AVFPSIVGR	ACTBM_HUMAN	Q9BYX7	Q.AVFPSIVGR.P	24	15	0.9941	1	1.05776	3.90625e-13
AVFPSIVGR	ACTB_HUMAN	Q96HG5	R.AVFPSIVGR.P	80.8	48	0.9941	1	1.05776	3.90625e-13
AVFPSIVGR	ACTC_HUMAN	P68032	R.AVFPSIVGR.P	48.806	32	0.9941	1	1.05776	3.90625e-13
AVFPSIVGR	ACTG_HUMAN	P63261	R.AVFPSIVGR.P	80.8	48	0.9941	1	1.05776	3.90625e-13
AVFPSIVGR	ACTH_HUMAN	P63267	R.AVFPSIVGR.P	46.277	28	0.9941	1	1.05776	3.90625e-13
AVFPSIVGR	ACTS_HUMAN	P68133	R.AVFPSIVGR.P	45.093	30	0.9941	1	1.05776	3.90625e-13
AVFPSIVGR	POTEE_HUMAN	Q6S8J3	R.AVFPSIVGR.P	12.186	18	0.9941	1	1.05776	3.90625e-13
AVFPSIVGR	POTEF_HUMAN	A5A3E0	R.AVFPSIVGR.P	10.512	17	0.9941	1	1.05776	3.90625e-13
AVFPSIVGRPR	ACTA_HUMAN	P62736	R.AVFPSIVGRPR.H	46.154	28	0.99433	1	0.823914	9.76563e-16
AVFPSIVGRPR	ACTBM_HUMAN	Q9BYX7	Q.AVFPSIVGRPR.H	24	15	0.99433	1	0.823914	9.76563e-16
AVFPSIVGRPR	ACTB_HUMAN	Q96HG5	R.AVFPSIVGRPR.H	80.8	48	0.99433	1	0.823914	9.76563e-16
AVFPSIVGRPR	ACTC_HUMAN	P68032	R.AVFPSIVGRPR.H	48.806	32	0.99433	1	0.823914	9.76563e-16
AVFPSIVGRPR	ACTG_HUMAN	P63261	R.AVFPSIVGRPR.H	80.8	48	0.99433	1	0.823914	9.76563e-16
AVFPSIVGRPR	ACTH_HUMAN	P63267	R.AVFPSIVGRPR.H	46.277	28	0.99433	1	0.823914	9.76563e-16
AVFPSIVGRPR	ACTS_HUMAN	P68133	R.AVFPSIVGRPR.H	45.093	30	0.99433	1	0.823914	9.76563e-16
AVFPSIVGRPR	POTEE_HUMAN	Q6S8J3	R.AVFPSIVGRPR.Q	12.186	18	0.99433	1	0.823914	9.76563e-16
AVFPSIVGRPR	POTEF_HUMAN	A5A3E0	R.AVFPSIVGRPR.Q	10.512	17	0.99433	1	0.823914	9.76563e-16
AVFQKENEER	ISK5_HUMAN	Q9NQ38	K.AVFQKENEER.K	4.229	4	0.92544	1	1.10987	5.17929e-12
AVFVDLEPTVIDEIR	TBA4A_HUMAN	P68366	R.AVFVDLEPTVIDEIR.N	34.598	13	0.99307	1	0.430517	1.01754e-16
AVFVDLEPTVIDEVR	TBA1A_HUMAN	Q71U36	R.AVFVDLEPTVIDEVR.T	37.694	14	0.99349	1	0.0585573	3.71781e-16
AVFVDLEPTVIDEVR	TBA1B_HUMAN	P68363	R.AVFVDLEPTVIDEVR.T	40.798	15	0.99349	1	0.0585573	3.71781e-16
AVFVDLEPTVIDEVR	TBA1C_HUMAN	Q9BQE3	R.AVFVDLEPTVIDEVR.T	40.98	15	0.99349	1	0.0585573	3.71781e-16
AVGFLEIGYQK	A2ML1_HUMAN	A8K2U0	R.AVGFLEIGYQK.E	27.854	29	0.99419	1	1.03289	3.90625e-15
AVIDEIFQGLDANQDEQVDFQEFISLVAIALK	S10AC_HUMAN	P80511	K.AVIDEIFQGLDANQDEQVDFQEFISLVAIALK.A	57.609	3	0.99232	1	1.57915	1.42224e-24
AVINSAGYK	NIBL1_HUMAN	Q96TA1	R.AVINSAGYK.I	12.824	6	0.98601	1	1.24809	7.8125e-13
AVIVLVENFYK	S10AG_HUMAN	Q96FQ6	K.AVIVLVENFYK.Y	67.961	9	0.99292	1	0.975703	2.53906e-15
AVLEKTDEPGKYTADGGK	LCN1_HUMAN	P31025	K.AVLEKTDEPGKYTADGGK.H	76.136	13	0.99289	1	1.66805	1.88631e-18
AVLEKTDEPGKYTADGGKHVAYIIR	LCN1_HUMAN	P31025	K.AVLEKTDEPGKYTADGGKHVAYIIR.S	76.136	13	0.9926	1	1.14414	1.71997e-23
AVLEYLTAEILELAGNAAR	H2A1B_HUMAN	P04908	A.AVLEYLTAEILELAGNAAR.D	57.692	14	0.99331	1	1.87259	3.745e-18
AVLEYLTAEILELAGNAAR	H2A1C_HUMAN	Q93077	A.AVLEYLTAEILELAGNAAR.D	63.077	15	0.99331	1	1.87259	3.745e-18
AVLEYLTAEILELAGNAAR	H2A1D_HUMAN	P20671	A.AVLEYLTAEILELAGNAAR.D	57.692	14	0.99331	1	1.87259	3.745e-18
AVLEYLTAEILELAGNAAR	H2A1H_HUMAN	Q96KK5	A.AVLEYLTAEILELAGNAAR.D	64.062	15	0.99331	1	1.87259	3.745e-18
AVLEYLTAEILELAGNAAR	H2A1J_HUMAN	Q99878	A.AVLEYLTAEILELAGNAAR.D	64.062	15	0.99331	1	1.87259	3.745e-18
AVLEYLTAEILELAGNAAR	H2A1_HUMAN	P0C0S8	A.AVLEYLTAEILELAGNAAR.D	63.077	15	0.99331	1	1.87259	3.745e-18
AVLEYLTAEILELAGNAAR	H2A2A_HUMAN	Q6FI13	A.AVLEYLTAEILELAGNAAR.D	63.077	16	0.99331	1	1.87259	3.745e-18
AVLEYLTAEILELAGNAAR	H2A2B_HUMAN	Q8IUE6	A.AVLEYLTAEILELAGNAAR.D	49.231	12	0.99331	1	1.87259	3.745e-18
AVLEYLTAEILELAGNAAR	H2A2C_HUMAN	Q16777	A.AVLEYLTAEILELAGNAAR.D	63.566	16	0.99331	1	1.87259	3.745e-18
AVLEYLTAEILELAGNAAR	H2A3_HUMAN	Q7L7L0	A.AVLEYLTAEILELAGNAAR.D	57.692	14	0.99331	1	1.87259	3.745e-18
AVLEYLTAEILELAGNAAR	H2AJ_HUMAN	Q9BTM1	A.AVLEYLTAEILELAGNAAR.D	63.566	15	0.99331	1	1.87259	3.745e-18
AVLEYLTAEILELAGNAAR	H2AX_HUMAN	P16104	A.AVLEYLTAEILELAGNAAR.D	39.86	11	0.99331	1	1.87259	3.745e-18
AVLEYLTAEILELAGNAAR	H2AY_HUMAN	O75367	A.AVLEYLTAEILELAGNAAR.D	5.914	9	0.99331	1	1.87259	3.745e-18
AVLVDLEPGTMDSVR	TBB8_HUMAN	Q3ZCM7	R.AVLVDLEPGTMDSVR.S	13.063	6	0.99307	1	0.151361	1.25421e-14
AVMDDFAAFVEK	ALBU_HUMAN	Q9P157	K.AVMDDFAAFVEK.C	41.544	47	0.99419	1	0.616937	2.44141e-17
AVQGFHTGVHQAGK	SBSN_HUMAN	Q6UWP8	K.AVQGFHTGVHQAGK.E	46.964	9	0.99295	1	1.31473	1.70103e-16
AVSALGNAYFGSGSGPITLDDVECSGTESTLWQCRN	DMBT1_HUMAN	Q9Y4V9	R.AVSALGNAYFGSGSGPITLDDVECSGTESTLWQCRN.R	14.463	9	0.98829	1	0.640246	7.01232e-18
AVSNEIVRFPTDQLTPDQER	PERM_HUMAN	P05164	R.AVSNEIVRFPTDQLTPDQER.S	29.396	23	0.99254	1	0.331395	3.28638e-21
AVTDKFLSAIVSSVDKIPYGMR	IQGA1_HUMAN	P46940	R.AVTDKFLSAIVSSVDKIPYGMR.F	8.69	9	0.99281	1	1.48856	1.76507e-14
AVTEQGHELSNEER	1433B_HUMAN	P31946	K.AVTEQGHELSNEER.N	36.179	8	0.9932	1	0.940207	4.88281e-19
AVTGYNDPETGNIISLFQAMNK	DESP_HUMAN	P15924	R.AVTGYNDPETGNIISLFQAMNK.E	49.739	138	0.99283	1	1.04317	2.97237e-23
AVTKYTSSK	H2B1A_HUMAN	Q96A08	K.AVTKYTSSK.-	25.984	7	0.9926	1	1.55461	3.90625e-13
AVTKYTSSK	H2B1B_HUMAN	P33778	K.AVTKYTSSK.-	38.889	11	0.9926	1	1.55461	3.90625e-13
AVTKYTSSK	H2B1C_HUMAN	P62807	K.AVTKYTSSK.-	38.889	11	0.9926	1	1.55461	3.90625e-13
AVTKYTSSK	H2B1D_HUMAN	P58876	K.AVTKYTSSK.-	38.889	11	0.9926	1	1.55461	3.90625e-13
AVTKYTSSK	H2B1H_HUMAN	Q93079	K.AVTKYTSSK.-	38.889	11	0.9926	1	1.55461	3.90625e-13
AVTKYTSSK	H2B1L_HUMAN	Q99880	K.AVTKYTSSK.-	38.889	11	0.9926	1	1.55461	3.90625e-13
AVTKYTSSK	H2B1M_HUMAN	Q99879	K.AVTKYTSSK.-	38.889	11	0.9926	1	1.55461	3.90625e-13
AVTKYTSSK	H2B1N_HUMAN	Q99877	K.AVTKYTSSK.-	38.889	11	0.9926	1	1.55461	3.90625e-13
AVTKYTSSK	H2B1O_HUMAN	P23527	K.AVTKYTSSK.-	38.889	11	0.9926	1	1.55461	3.90625e-13
AVTKYTSSK	H2B2E_HUMAN	Q16778	K.AVTKYTSSK.-	38.889	11	0.9926	1	1.55461	3.90625e-13
AVTKYTSSK	H2B2F_HUMAN	Q5QNW6	K.AVTKYTSSK.-	38.889	11	0.9926	1	1.55461	3.90625e-13
AVTKYTSSK	H2B3B_HUMAN	Q8N257	K.AVTKYTSSK.-	38.889	11	0.9926	1	1.55461	3.90625e-13
AVTLSLDGGDTAIR	MUC5B_HUMAN	Q7M4S5	K.AVTLSLDGGDTAIR.V	6.265	25	0.99361	1	0.388188	5.85938e-18
AVVGDAQYHHFR	LEG7_HUMAN	P47929	K.AVVGDAQYHHFR.H	56.618	11	0.99263	1	1.27477	4.88281e-17
AWGPGLEGGVVGK	FLNA_HUMAN	P21333	R.AWGPGLEGGVVGK.S	1.964	4	0.9942	1	0.965858	4.37879e-15
AWGVDLASVEQHINSHR	DESP_HUMAN	P15924	V.AWGVDLASVEQHINSHR.G	49.739	138	0.9921	1	1.16635	3.79324e-17
AYFHLLNQIAPK	PLSI_HUMAN	Q14651	R.AYFHLLNQIAPK.G	4.134	2	0.99319	1	0.962457	1.38183e-14
AYFHLLNQIAPK	PLST_HUMAN	P13797	K.AYFHLLNQIAPK.G	16.984	8	0.99319	1	0.962457	1.38183e-14
AYIFIDEAHITQALIWLSQR	A2MG_HUMAN	P01023	R.AYIFIDEAHITQALIWLSQR.Q	24.763	26	0.99278	1	1.14177	6.90013e-19
AYLPVNESFGFTADLR	EF2_HUMAN	P13639	K.AYLPVNESFGFTADLR.S	33.566	23	0.99368	0.896023	0.620661	6.10352e-22
AYTEVAAAQQQLLQQLEFAR	EVPL_HUMAN	Q92817	K.AYTEVAAAQQQLLQQLEFAR.K	19.97	31	0.99411	1	0.739996	8.82851e-19
AYTNFDAER	ANXA2_HUMAN	P07355	K.AYTNFDAER.D	53.097	24	0.99026	1	0.280429	3.125e-13
AYTNFDAER	AXA2L_HUMAN	A6NMY6	K.AYTNFDAER.D	41.003	18	0.99026	1	0.280429	3.125e-13
AYTNFDAERDALNIETAIK	ANXA2_HUMAN	P07355	K.AYTNFDAERDALNIETAIK.T	53.097	24	0.99414	1	0.68935	2.0415e-17
AYTNFDAERDALNIETAIK	AXA2L_HUMAN	A6NMY6	K.AYTNFDAERDALNIETAIK.T	41.003	18	0.99414	1	0.68935	2.0415e-17
AYTNFDAERDALNIETAIKTK	ANXA2_HUMAN	P07355	K.AYTNFDAERDALNIETAIKTK.G	53.097	24	0.99323	1	1.37798	6.18991e-17
AYTNFDAERDALNIETAIKTK	AXA2L_HUMAN	A6NMY6	K.AYTNFDAERDALNIETAIKTK.G	41.003	18	0.99323	1	1.37798	6.18991e-17
DAATDVASR	TGM3_HUMAN	Q08188	R.DAATDVASR.N	58.297	45	0.99262	1	0.369074	1.95313e-13
DAEAWFNEK	K1C10_HUMAN	P13645	K.DAEAWFNEK.S	52.74	27	0.994	1	0.684179	2.07031e-13
DAEAWFNEK	K1C25_HUMAN	Q7Z3Z0	R.DAEAWFNEK.S	4	2	0.994	1	0.684179	2.07031e-13
DAEAWFNEK	K1C27_HUMAN	Q7Z3Y8	R.DAEAWFNEK.S	6.318	3	0.994	1	0.684179	2.07031e-13
DAEAWFNEK	K1C28_HUMAN	Q7Z3Y7	K.DAEAWFNEK.S	3.879	2	0.994	1	0.684179	2.07031e-13
DAEDWFFSK	K1C17_HUMAN	Q8N1P6	K.DAEDWFFSK.T	60.648	30	0.99369	1	1.15742	2.05078e-13
DAEDWFFSKTEELNR	K1C17_HUMAN	Q8N1P6	K.DAEDWFFSKTEELNR.E	60.648	30	0.99351	1	1.04701	1.2207e-20
DAEEWFFTK	K1C14_HUMAN	P02533	K.DAEEWFFTK.T	60.593	45	0.99321	1	1.20519	2.14844e-13
DAEEWFFTKTEELNR	K1C14_HUMAN	P02533	K.DAEEWFFTKTEELNR.E	60.593	45	0.99419	1	0.682331	1.34583e-20
DAEEWFFTKTEELNREVATNSELVQSGK	K1C14_HUMAN	P02533	K.DAEEWFFTKTEELNREVATNSELVQSGK.S	60.593	45	0.99094	1	0.174387	3.24264e-29
DAETWFLSK	K1C16_HUMAN	P08779	R.DAETWFLSK.T	72.304	50	0.99427	1	0.942837	3.90625e-13
DAETWFLSKTEELNK	K1C16_HUMAN	P08779	R.DAETWFLSKTEELNK.E	72.304	50	0.97313	1	-0.79044	1.3531e-16
DAFDRNPELQNLLLDDFFK	6PGD_HUMAN	P52209	K.DAFDRNPELQNLLLDDFFK.S	41.615	17	0.99241	1	1.29235	2.93535e-18
DAGTIAGLNVLR	HSP7C_HUMAN	P11142	K.DAGTIAGLNVLR.I	39.783	24	0.9936	1	0.442158	2.72461e-15
DAGTIAGLNVMR	GRP78_HUMAN	P11021	K.DAGTIAGLNVMR.I	25.994	13	0.99289	1	0.685997	2.49024e-15
DAGVIAGLNVLR	HS71L_HUMAN	P34931	K.DAGVIAGLNVLR.I	17.941	9	0.9936	1	0.996668	3.41797e-16
DAGVIAGLNVLR	HSP71_HUMAN	P08107	K.DAGVIAGLNVLR.I	43.058	20	0.9936	1	0.996668	3.41797e-16
DAHSKRVELEAALQQAKEELAR	K2C4_HUMAN	P19013	K.DAHSKRVELEAALQQAKEELAR.M	74.532	75	0.98973	1	1.04788	4.77453e-18
DALNIETAIK	ANXA2_HUMAN	P07355	R.DALNIETAIK.T	53.097	24	0.99375	1	0.711583	3.36328e-12
DALNIETAIK	AXA2L_HUMAN	A6NMY6	R.DALNIETAIK.T	41.003	18	0.99375	1	0.711583	3.36328e-12
DALVLTPASLWKPSSPVSQ	LPLC1_HUMAN	Q9H4V6	K.DALVLTPASLWKPSSPVSQ.-	45.041	20	0.99142	1	0.46615	4.09273e-18
DAPEEEDHVLVLR	PDIA1_HUMAN	P07237	A.DAPEEEDHVLVLR.K	48.819	20	0.9937	1	0.90015	1.24911e-14
DAQAKVDELEAALR	K2C78_HUMAN	Q8N1N4	K.DAQAKVDELEAALR.M	44.038	31	0.99273	1	1.14473	3.07409e-16
DASGATFTWTPSSGK	IGHA2_HUMAN	P01877	R.DASGATFTWTPSSGK.S	36.176	13	0.99348	1	0.0927439	3.05176e-21
DASGVTFTWTPSSGK	IGHA1_HUMAN	P01876	R.DASGVTFTWTPSSGK.S	44.476	16	0.99197	1	-0.278882	3.05176e-21
DASMVYGSEEPLAR	PERM_HUMAN	P05164	V.DASMVYGSEEPLAR.N	29.396	23	0.99153	1	0.994229	1.16211e-15
DATNVGDEGGFAPNILENKEGLELLK	ENOA_HUMAN	Q6GMP2	K.DATNVGDEGGFAPNILENKEGLELLK.T	64.977	24	0.99235	1	0.562251	1.15234e-23
DAVTYTEHAK	H4_HUMAN	P62805	R.DAVTYTEHAK.R	52.427	12	0.99341	1	0.251426	9.76563e-15
DDGLFSGDPNWFPK	TAGL2_HUMAN	P37802	R.DDGLFSGDPNWFPK.K	39.698	7	0.99318	1	0.798138	3.21754e-15
DDGLFSGDPNWFPKK	TAGL2_HUMAN	P37802	R.DDGLFSGDPNWFPKK.S	39.698	7	0.99246	1	1.30822	3.69478e-13
DDNPNLPR	ALBU_HUMAN	Q9P157	K.DDNPNLPR.L	41.544	47	0.99285	1	1.10747	9.00391e-12
DEATIIDILTKR	ANXA1_HUMAN	P04083	V.DEATIIDILTKR.N	67.052	42	0.99276	1	0.692399	7.16309e-14
DEFKPLVEEPQNLIK	ALBU_HUMAN	Q9P157	F.DEFKPLVEEPQNLIK.Q	41.544	47	0.9922	1	1.86724	6.00496e-16
DFDFVPPVVR	CO3_HUMAN	P01024	K.DFDFVPPVVR.W	20.204	22	0.99273	1	1.34153	1.17188e-13
DFFLANASR	CAN1_HUMAN	P07384	R.DFFLANASR.A	16.807	9	0.98961	1	1.05935	3.08115e-11
DFHINLFQVLPWLK	CFAB_HUMAN	Q9BX92	R.DFHINLFQVLPWLK.E	1.832	2	0.99305	1	1.41546	1.54775e-15
DFLAGGIAAAISK	ADT3_HUMAN	P12236	K.DFLAGGIAAAISK.T	14.43	4	0.99006	1	1.17963	4.07227e-15
DFLAGGVAAAISK	ADT2_HUMAN	P05141	K.DFLAGGVAAAISK.T	14.43	4	0.99429	1	1.0967	9.76563e-18
DFNVGDYIQAVLDR	PYGL_HUMAN	P06737	R.DFNVGDYIQAVLDR.N	6.139	4	0.99216	1	1.30122	5.61728e-16
DFPAVPYSGWDFNDGK	AMY1_HUMAN	P04745	R.DFPAVPYSGWDFNDGK.C	65.362	60	0.9915	1	-0.237403	2.68555e-21
DFPAVPYSGWDFNDGK	AMY2B_HUMAN	P19961	R.DFPAVPYSGWDFNDGK.C	53.816	42	0.9915	1	-0.237403	2.68555e-21
DFPAVPYSGWDFNDGK	AMYP_HUMAN	P04746	R.DFPAVPYSGWDFNDGK.C	45.597	37	0.9915	1	-0.237403	2.68555e-21
DGAGDVAFIR	TRFL_HUMAN	Q8TCD2	R.DGAGDVAFIR.E	34.085	34	0.99372	1	0.818241	1.95313e-14
DGAGDVAFVK	TRFE_HUMAN	P02787	K.DGAGDVAFVK.H	29.37	20	0.99327	1	0.329316	9.76563e-15
DGAGFLINLIDSPGHVDFSSEVTAALR	EF2_HUMAN	P13639	K.DGAGFLINLIDSPGHVDFSSEVTAALR.V	33.566	23	0.99121	1	1.47343	6.00763e-19
DGFFGNPR	IGHM_HUMAN	P01871	R.DGFFGNPR.K	19.027	7	0.99378	1	1.04644	3.90625e-12
DGFFGNPR	MUCB_HUMAN	P04220	R.DGFFGNPR.K	15.857	5	0.99378	1	1.04644	3.90625e-12
DGGDSEQFIDEER	PRPC_HUMAN	P02810	S.DGGDSEQFIDEER.Q	51.807	18	0.99364	1	0.410068	4.88281e-17
DGGIDPLVR	PERL_HUMAN	P22079	K.DGGIDPLVR.G	32.865	16	0.99398	0.957282	0.694951	7.8125e-13
DGLAFNALIHR	ACTN4_HUMAN	O43707	K.DGLAFNALIHR.H	42.371	27	0.99401	1	0.834083	5.2832e-14
DGNGNTWLTAFVTK	A2ML1_HUMAN	A8K2U0	R.DGNGNTWLTAFVTK.C	27.854	29	0.99338	1	0.667415	7.56836e-19
DGSFSVVITGLR	PIGR_HUMAN	P01833	K.DGSFSVVITGLR.K	27.88	25	0.99351	1	0.805015	1.95313e-16
DGVVEITGK	HSPB1_HUMAN	Q9UC36	K.DGVVEITGK.H	94.146	23	0.99346	1	0.772516	3.90625e-13
DGVVEITGKHEER	HSPB1_HUMAN	Q9UC36	K.DGVVEITGKHEER.Q	94.146	23	0.99347	1	0.999638	2.14844e-16
DGVVEITGKHEERQDEHGYISR	HSPB1_HUMAN	Q9UC36	K.DGVVEITGKHEERQDEHGYISR.C	94.146	23	0.99305	1	1.03634	2.89728e-18
DHGQPGYNSWR	PERL_HUMAN	P22079	R.DHGQPGYNSWR.A	32.865	16	0.99242	1	0.473787	1.5625e-15
DHQLLEPIRDFEAR	TRI29_HUMAN	Q14134	R.DHQLLEPIRDFEAR.K	14.116	8	0.99375	0.999991	0.89379	2.13477e-13
DHYIFYCEGELHGKPVRG	LCN1_HUMAN	P31025	K.DHYIFYCEGELHGKPVRG.V	76.136	13	0.91322	1	1.61478	4.50192e-11
DIAPTLTLYVGK	HPTR_HUMAN	P00739	K.DIAPTLTLYVGK.K	8.621	4	0.99378	1	0.600284	1.56653e-14
DIAPTLTLYVGK	HPT_HUMAN	P00738	K.DIAPTLTLYVGK.K	18.966	10	0.99378	1	0.600284	1.56653e-14
DIAPTLTLYVGKK	HPTR_HUMAN	P00739	K.DIAPTLTLYVGKK.Q	8.621	4	0.99308	1	1.21581	2.92969e-17
DIAPTLTLYVGKK	HPT_HUMAN	P00738	K.DIAPTLTLYVGKK.Q	18.966	10	0.99308	1	1.21581	2.92969e-17
DIILDNPTLTLEVLNEAR	TGM3_HUMAN	Q08188	R.DIILDNPTLTLEVLNEAR.V	58.297	45	0.99384	1	0.147589	4.30298e-23
DIQMTQSPSSLSASVGDR	KV108_HUMAN	P01600	-.DIQMTQSPSSLSASVGDR.V	29.63	2	0.99296	1	0.33229	2.57874e-23
DIQMTQSPSSLSASVGDR	KV109_HUMAN	P01601	C.DIQMTQSPSSLSASVGDR.V	27.35	2	0.99296	1	0.33229	2.57874e-23
DIQMTQSPSSLSASVGDR	KV117_HUMAN	P01609	-.DIQMTQSPSSLSASVGDR.V	29.63	2	0.99296	1	0.33229	2.57874e-23
DIQMTQSPSSLSASVGDR	KV123_HUMAN	P04431	C.DIQMTQSPSSLSASVGDR.V	24.806	2	0.99296	1	0.33229	2.57874e-23
DIQMTQSPSTLSASVGDR	KV104_HUMAN	P01596	-.DIQMTQSPSTLSASVGDR.V	29.907	2	0.99321	1	0.229717	6.25611e-24
DIQMTQSPSTLSASVGDR	KV106_HUMAN	P01598	-.DIQMTQSPSTLSASVGDR.V	26.852	2	0.99321	1	0.229717	6.25611e-24
DIQMTQSPSTLSASVGDR	KV110_HUMAN	P01602	C.DIQMTQSPSTLSASVGDR.V	24.786	2	0.99321	1	0.229717	6.25611e-24
DISLSDYK	PRDX1_HUMAN	Q06830	K.DISLSDYK.G	48.744	12	0.99007	1	0.726698	1.5625e-11
DISQAYYTVYKK	ANXA3_HUMAN	P12429	K.DISQAYYTVYKK.S	31.579	8	0.99351	1	0.996721	4.92725e-16
DITSDTSGDFR	ANXA1_HUMAN	P04083	K.DITSDTSGDFR.N	67.052	42	0.99422	1	0.566916	9.76563e-16
DITSDTSGDFRNALLSLAK	ANXA1_HUMAN	P04083	K.DITSDTSGDFRNALLSLAK.G	67.052	42	0.99344	1	0.933751	7.78939e-21
DITYFIQQLLR	ARP3_HUMAN	P61158	R.DITYFIQQLLR.D	10.766	4	0.99243	1	1.27253	3.125e-14
DIVMTQSPDSLAVSLGER	KV401_HUMAN	P06312	G.DIVMTQSPDSLAVSLGER.A	46.281	4	0.9942	1	0.925845	2.8215e-20
DIVMTQSPDSLAVSLGER	KV402_HUMAN	P01625	-.DIVMTQSPDSLAVSLGER.A	49.123	4	0.9942	1	0.925845	2.8215e-20
DIVMTQSPDSLAVSLGER	KV403_HUMAN	P06313	G.DIVMTQSPDSLAVSLGER.A	42.105	4	0.9942	1	0.925845	2.8215e-20
DIVMTQSPDSLAVSLGER	KV404_HUMAN	P06314	G.DIVMTQSPDSLAVSLGER.A	41.791	4	0.9942	1	0.925845	2.8215e-20
DIWMGGVSEPLKR	PERM_HUMAN	P05164	I.DIWMGGVSEPLKR.K	29.396	23	0.99087	1	0.956577	2.92969e-16
DKILTATIENNR	K1C13_HUMAN	P13646	R.DKILTATIENNR.V	69.869	59	0.99327	1	0.774763	3.90625e-16
DKILTATIENNRVILEIDNAR	K1C13_HUMAN	P13646	R.DKILTATIENNRVILEIDNAR.L	69.869	59	0.9933	1	1.11695	1.43265e-18
DKNEDKKIDFSEFLSLLGDIATDYHK	S10A7_HUMAN	P31151	K.DKNEDKKIDFSEFLSLLGDIATDYHK.Q	49.505	9	0.99256	1	1.60875	1.27478e-19
DLADELALVDVIEDK	LDHA_HUMAN	P00338	K.DLADELALVDVIEDK.L	29.217	10	0.99197	1	1.01313	9.10279e-18
DLADELALVDVIEDKLK	LDHA_HUMAN	P00338	K.DLADELALVDVIEDKLK.G	29.217	10	0.96547	1	1.31247	9.70491e-12
DLADELALVDVIEDKLKGEMMDLQHGSLFLR	LDHA_HUMAN	P00338	K.DLADELALVDVIEDKLKGEMMDLQHGSLFLR.T	29.217	10	0.99107	1	1.37905	3.60586e-20
DLAKDITSDTSGDFR	ANXA1_HUMAN	P04083	R.DLAKDITSDTSGDFR.N	67.052	42	0.99313	1	0.655946	2.44141e-20
DLAKDITSDTSGDFRNALLSLAK	ANXA1_HUMAN	P04083	R.DLAKDITSDTSGDFRNALLSLAK.G	67.052	42	0.99197	1	0.0980302	3.81923e-18
DLATVYVDVLK	APOA1_HUMAN	P02647	K.DLATVYVDVLK.D	63.296	16	0.99399	1	1.03606	1.95313e-15
DLGEELEALKTELEDTLDSTAAQQELR	MYH9_HUMAN	P35579	R.DLGEELEALKTELEDTLDSTAAQQELR.S	15.357	24	0.99316	1	0.750214	5.05681e-25
DLGEENFK	ALBU_HUMAN	Q9P157	K.DLGEENFK.A	41.544	47	0.99344	1	1.13096	7.8125e-12
DLGTESQIFISR	GDIB_HUMAN	P50395	K.DLGTESQIFISR.T	19.101	7	0.99374	1	1.12758	1.74686e-13
DLIDFDDR	DESP_HUMAN	P15924	R.DLIDFDDR.Q	49.739	138	0.98805	1	0.829019	1.5625e-11
DLIDFDDRQQIYAAEK	DESP_HUMAN	P15924	R.DLIDFDDRQQIYAAEK.A	49.739	138	0.99308	1	0.672277	1.52211e-17
DLISHDEMFSDIYK	TCTP_HUMAN	P13693	R.DLISHDEMFSDIYK.I	13.953	2	0.9932	1	1.73673	1.0898e-18
DLKDEIVR	DESP_HUMAN	P15924	R.DLKDEIVR.L	49.739	138	0.83234	1	0.375657	3.125e-11
DLLDDLKSELTGKFEK	ANXA5_HUMAN	P08758	R.DLLDDLKSELTGKFEK.L	17.188	4	0.99258	1	1.43754	1.14096e-15
DLLFKDSAHGFLK	TRFE_HUMAN	P02787	K.DLLFKDSAHGFLK.V	29.37	20	0.98924	1	1.06451	1.00407e-15
DLLFKDSAIGFSR	TRFL_HUMAN	Q8TCD2	K.DLLFKDSAIGFSR.V	34.085	34	0.99231	1	1.2878	2.92969e-17
DLQGRDEQSEEKKK	MYH9_HUMAN	P35579	R.DLQGRDEQSEEKKK.Q	15.357	24	0.99224	1	1.99594	3.30789e-13
DLQNFLKKENKNEK	S10A9_HUMAN	P06702	K.DLQNFLKKENKNEK.V	90.351	13	0.98451	1	0.857163	2.45427e-12
DLSFKDTQLKEYEELLASVR	POF1B_HUMAN	Q8WVV4	K.DLSFKDTQLKEYEELLASVR.A	13.752	6	0.99291	1	1.26795	2.3827e-19
DLSMIVLLPNEIDGLQKLEEK	SPB3_HUMAN	Q8IXI3	K.DLSMIVLLPNEIDGLQKLEEK.L	42.821	15	0.99352	1	0.741856	1.56795e-14
DLSMIVLLPNEIDGLQKLEEK	SPB4_HUMAN	P48594	K.DLSMIVLLPNEIDGLQKLEEK.L	27.179	10	0.99352	1	0.741856	1.56795e-14
DLTDYLMK	ACTA_HUMAN	P62736	R.DLTDYLMK.I	46.154	28	0.99403	1	0.852248	1.5625e-11
DLTDYLMK	ACTBL_HUMAN	Q562R1	R.DLTDYLMK.I	28.457	15	0.99403	1	0.852248	1.5625e-11
DLTDYLMK	ACTB_HUMAN	Q96HG5	R.DLTDYLMK.I	80.8	48	0.99403	1	0.852248	1.5625e-11
DLTDYLMK	ACTC_HUMAN	P68032	R.DLTDYLMK.I	48.806	32	0.99403	1	0.852248	1.5625e-11
DLTDYLMK	ACTG_HUMAN	P63261	R.DLTDYLMK.I	80.8	48	0.99403	1	0.852248	1.5625e-11
DLTDYLMK	ACTH_HUMAN	P63267	R.DLTDYLMK.I	46.277	28	0.99403	1	0.852248	1.5625e-11
DLTDYLMK	ACTS_HUMAN	P68133	R.DLTDYLMK.I	45.093	30	0.99403	1	0.852248	1.5625e-11
DLTEFQTNLVPYPR	TBA1A_HUMAN	Q71U36	V.DLTEFQTNLVPYPR.I	37.694	14	0.99307	1	0.19718	1.62367e-12
DLTEFQTNLVPYPR	TBA1B_HUMAN	P68363	V.DLTEFQTNLVPYPR.I	40.798	15	0.99307	1	0.19718	1.62367e-12
DLTEFQTNLVPYPR	TBA1C_HUMAN	Q9BQE3	V.DLTEFQTNLVPYPR.I	40.98	15	0.99307	1	0.19718	1.62367e-12
DLTEFQTNLVPYPR	TBA3C_HUMAN	Q13748	V.DLTEFQTNLVPYPR.I	32.444	12	0.99307	1	0.19718	1.62367e-12
DLTEFQTNLVPYPR	TBA3E_HUMAN	Q6PEY2	V.DLTEFQTNLVPYPR.I	26.222	9	0.99307	1	0.19718	1.62367e-12
DLTEFQTNLVPYPR	TBA4A_HUMAN	P68366	V.DLTEFQTNLVPYPR.I	34.598	13	0.99307	1	0.19718	1.62367e-12
DLTEFQTNLVPYPR	TBA8_HUMAN	Q9NY65	V.DLTEFQTNLVPYPR.I	23.608	9	0.99307	1	0.19718	1.62367e-12
DLVTTLGGALLWLSGHAGTQAQGAAR	TYPH_HUMAN	P19971	R.DLVTTLGGALLWLSGHAGTQAQGAAR.V	8.506	2	0.99303	1	1.24993	1.65876e-16
DLYANTVLSGGTTMYPGIADR	ACTB_HUMAN	Q96HG5	K.DLYANTVLSGGTTMYPGIADR.M	80.8	48	0.99363	1	0.254961	4.6846e-20
DLYANTVLSGGTTMYPGIADR	ACTG_HUMAN	P63261	K.DLYANTVLSGGTTMYPGIADR.M	80.8	48	0.99363	1	0.254961	4.6846e-20
DLYDAGVKR	ANXA2_HUMAN	P07355	R.DLYDAGVKR.K	53.097	24	0.99292	0.999945	1.32926	7.8125e-13
DLYDAGVKR	AXA2L_HUMAN	A6NMY6	Q.DLYDAGVKR.K	41.003	18	0.99292	0.999945	1.32926	7.8125e-13
DMMSEIDRDGNGTVDFPEFLGMMAR	CALL3_HUMAN	P27482	R.DMMSEIDRDGNGTVDFPEFLGMMAR.K	43.624	4	0.9933	1	0.398169	1.66443e-21
DMYSFLEDMGLK	A2MG_HUMAN	P01023	K.DMYSFLEDMGLK.A	24.763	26	0.99227	1	1.55633	2.44141e-16
DNENVVNEYSSELEK	FIBB_HUMAN	P02675	K.DNENVVNEYSSELEK.H	26.477	10	0.99247	1	0.386247	4.2294e-19
DNIQGITKPAIR	H4_HUMAN	P62805	R.DNIQGITKPAIR.R	52.427	12	0.99334	1	0.750257	9.72852e-15
DNLSSWLEHLPR	EVPL_HUMAN	Q92817	K.DNLSSWLEHLPR.S	19.97	31	0.99257	1	0.911968	1.00549e-14
DNLTLWTADNAGEEGGEAPQEPQS	1433S_HUMAN	P31947	R.DNLTLWTADNAGEEGGEAPQEPQS.-	64.919	17	0.99328	1	0.515289	4.633e-15
DNSKNTLYLQMNSLR	HV303_HUMAN	P01764	R.DNSKNTLYLQMNSLR.A	12.821	2	0.99358	1	0.547083	1.95313e-19
DNTAQQIKK	SPB3_HUMAN	Q8IXI3	K.DNTAQQIKK.V	42.821	15	0.97485	1	1.9862	1.34902e-11
DQQEAALVDMVNDGVEDLR	GSTP1_HUMAN	P09211	K.DQQEAALVDMVNDGVEDLR.C	65.714	12	0.99316	1	0.922507	2.65005e-23
DQVANSAFVER	HS90A_HUMAN	P07900	K.DQVANSAFVER.L	19.945	13	0.99327	1	1.16808	2.9541e-15
DQYEQMAEK	K1C16_HUMAN	P08779	R.DQYEQMAEK.N	72.304	50	0.99285	1	1.19249	1.25513e-12
DRPARHPQEQP	PROL4_HUMAN	Q16378	R.DRPARHPQEQP.L	19.403	5	0.91346	1	1.3238	3.11064e-11
DRPARHPQEQPLW	PROL4_HUMAN	Q16378	R.DRPARHPQEQPLW.-	19.403	5	0.99356	1	0.427304	1.76603e-14
DRPFFPGLVK	NDK8_HUMAN	O60361	K.DRPFFPGLVK.Y	19.708	2	0.99253	1	1.416	5.87091e-12
DRPFFPGLVK	NDKB_HUMAN	P22392	K.DRPFFPGLVK.Y	41.447	5	0.99253	1	1.416	5.87091e-12
DSAHGFLK	TRFE_HUMAN	P02787	K.DSAHGFLK.V	29.37	20	0.99278	0.997413	1.13392	7.8125e-12
DSAIGFSR	TRFL_HUMAN	Q8TCD2	K.DSAIGFSR.V	34.085	34	0.99323	1	0.987417	7.8125e-12
DSATMSLDPEEEAEHPIK	TGM3_HUMAN	Q08188	K.DSATMSLDPEEEAEHPIK.I	58.297	45	0.99423	1	0.812157	8.40217e-19
DSATMSLDPEEEAEHPIKI	TGM3_HUMAN	Q08188	K.DSATMSLDPEEEAEHPIKI.S	58.297	45	0.99304	1	0.840655	2.23626e-16
DSATMSLDPEEEAEHPIKISYAQYEK	TGM3_HUMAN	Q08188	K.DSATMSLDPEEEAEHPIKISYAQYEK.Y	58.297	45	0.99306	1	0.502623	7.14822e-23
DSGFQMNQLR	TRFE_HUMAN	P02787	K.DSGFQMNQLR.G	29.37	20	0.9941	1	0.865769	7.8125e-14
DSGVPDRFSGSGSGTDFTLK	KV206_HUMAN	P06310	R.DSGVPDRFSGSGSGTDFTLK.I	15.038	2	0.99274	1	0.776021	5.46402e-17
DSLLQDGEFSMDLR	PROF1_HUMAN	P07737	R.DSLLQDGEFSMDLR.T	68.571	10	0.99331	1	0.381846	3.41797e-18
DSLNDEINFLK	K2C4_HUMAN	P19013	V.DSLNDEINFLK.V	74.532	75	0.98641	1	1.90198	1.29004e-13
DSPSVWAAVPGK	PROF1_HUMAN	P07737	K.DSPSVWAAVPGK.T	68.571	10	0.993	1	1.20846	4.6283e-16
DSTLIMQLLR	1433B_HUMAN	P31946	K.DSTLIMQLLR.D	36.179	8	0.99394	1	1.11429	3.125e-13
DSTLIMQLLR	1433E_HUMAN	P62258	K.DSTLIMQLLR.D	19.608	5	0.99394	1	1.11429	3.125e-13
DSTLIMQLLR	1433F_HUMAN	Q04917	K.DSTLIMQLLR.D	7.317	2	0.99394	1	1.11429	3.125e-13
DSTLIMQLLR	1433G_HUMAN	P61981	K.DSTLIMQLLR.D	18.623	4	0.99394	1	1.11429	3.125e-13
DSTLIMQLLR	1433S_HUMAN	P31947	K.DSTLIMQLLR.D	64.919	17	0.99394	1	1.11429	3.125e-13
DSTLIMQLLR	1433T_HUMAN	P27348	K.DSTLIMQLLR.D	22.449	5	0.99394	1	1.11429	3.125e-13
DSTLIMQLLR	1433Z_HUMAN	Q6NUR9	K.DSTLIMQLLR.D	53.878	14	0.99394	1	1.11429	3.125e-13
DSTYSLSSTLTLSK	IGKC_HUMAN	P01834	K.DSTYSLSSTLTLSK.A	52.83	6	0.99347	1	-0.0792408	4.88281e-19
DSVFMGNHAER	TGM3_HUMAN	Q08188	V.DSVFMGNHAER.E	58.297	45	0.99269	1	1.01122	1.03027e-13
DSYVGDEAQSK	ACTA_HUMAN	P62736	K.DSYVGDEAQSK.R	46.154	28	0.99338	1	0.273734	9.76563e-16
DSYVGDEAQSK	ACTB_HUMAN	Q96HG5	K.DSYVGDEAQSK.R	80.8	48	0.99338	1	0.273734	9.76563e-16
DSYVGDEAQSK	ACTC_HUMAN	P68032	K.DSYVGDEAQSK.R	48.806	32	0.99338	1	0.273734	9.76563e-16
DSYVGDEAQSK	ACTG_HUMAN	P63261	K.DSYVGDEAQSK.R	80.8	48	0.99338	1	0.273734	9.76563e-16
DSYVGDEAQSK	ACTH_HUMAN	P63267	K.DSYVGDEAQSK.R	46.277	28	0.99338	1	0.273734	9.76563e-16
DSYVGDEAQSK	ACTS_HUMAN	P68133	K.DSYVGDEAQSK.R	45.093	30	0.99338	1	0.273734	9.76563e-16
DSYVGDEAQSKR	ACTA_HUMAN	P62736	K.DSYVGDEAQSKR.G	46.154	28	0.99327	1	0.79114	9.76563e-17
DSYVGDEAQSKR	ACTB_HUMAN	Q96HG5	K.DSYVGDEAQSKR.G	80.8	48	0.99327	1	0.79114	9.76563e-17
DSYVGDEAQSKR	ACTC_HUMAN	P68032	K.DSYVGDEAQSKR.G	48.806	32	0.99327	1	0.79114	9.76563e-17
DSYVGDEAQSKR	ACTG_HUMAN	P63261	K.DSYVGDEAQSKR.G	80.8	48	0.99327	1	0.79114	9.76563e-17
DSYVGDEAQSKR	ACTH_HUMAN	P63267	K.DSYVGDEAQSKR.G	46.277	28	0.99327	1	0.79114	9.76563e-17
DSYVGDEAQSKR	ACTS_HUMAN	P68133	K.DSYVGDEAQSKR.G	45.093	30	0.99327	1	0.79114	9.76563e-17
DTNGSQFFITTVK	PPIB_HUMAN	P23284	K.DTNGSQFFITTVK.T	36.111	7	0.994	1	0.980353	9.76563e-18
DTVIKPLLVEPEGLEK	A2MG_HUMAN	P01023	K.DTVIKPLLVEPEGLEK.E	24.763	26	0.99397	1	1.14694	8.58499e-18
DVDAAFMNK	K22O_HUMAN	Q01546	K.DVDAAFMNK.V	46.082	34	0.9891	1	0.892859	1.95313e-13
DVDAAFMNK	KRT84_HUMAN	Q9NSB2	K.DVDAAFMNK.S	5.833	5	0.9891	1	0.892859	1.95313e-13
DVDAAFMNKVELQAK	K22O_HUMAN	Q01546	K.DVDAAFMNKVELQAK.V	46.082	34	0.95923	1	0.891384	7.32422e-20
DVDAAYLNKVELEAK	K2C4_HUMAN	P19013	K.DVDAAYLNKVELEAK.V	74.532	75	0.99423	1	0.68175	2.44141e-20
DVDAAYLNKVELEAKVDSLNDEINFLK	K2C4_HUMAN	P19013	K.DVDAAYLNKVELEAKVDSLNDEINFLK.V	74.532	75	0.99326	1	0.687864	9.08957e-28
DVDAAYMNK	K2C5_HUMAN	P13647	K.DVDAAYMNK.V	65.932	71	0.99302	1	1.24355	1.95313e-13
DVDAAYMNK	K2C6A_HUMAN	P02538	K.DVDAAYMNK.V	70.035	77	0.99302	1	1.24355	1.95313e-13
DVDAAYMNK	K2C6B_HUMAN	P04259	K.DVDAAYMNK.V	68.44	73	0.99302	1	1.24355	1.95313e-13
DVDAAYMNK	K2C6C_HUMAN	P48668	K.DVDAAYMNK.V	67.553	75	0.99302	1	1.24355	1.95313e-13
DVDAAYMNK	K2C72_HUMAN	Q14CN4	K.DVDAAYMNK.V	6.458	7	0.99302	1	1.24355	1.95313e-13
DVDAAYMNK	K2C75_HUMAN	O95678	K.DVDAAYMNK.V	20.145	22	0.99302	1	1.24355	1.95313e-13
DVDAAYMNKV	K2C5_HUMAN	P13647	K.DVDAAYMNKV.E	65.932	71	0.9932	1	1.38771	1.95313e-14
DVDAAYMNKV	K2C6A_HUMAN	P02538	K.DVDAAYMNKV.E	70.035	77	0.9932	1	1.38771	1.95313e-14
DVDAAYMNKV	K2C6B_HUMAN	P04259	K.DVDAAYMNKV.E	68.44	73	0.9932	1	1.38771	1.95313e-14
DVDAAYMNKV	K2C6C_HUMAN	P48668	K.DVDAAYMNKV.E	67.553	75	0.9932	1	1.38771	1.95313e-14
DVDAAYMNKV	K2C72_HUMAN	Q14CN4	K.DVDAAYMNKV.E	6.458	7	0.9932	1	1.38771	1.95313e-14
DVDAAYMNKV	K2C75_HUMAN	O95678	K.DVDAAYMNKV.E	20.145	22	0.9932	1	1.38771	1.95313e-14
DVDAAYMNKVELEAK	K2C5_HUMAN	P13647	K.DVDAAYMNKVELEAK.V	65.932	71	0.99013	1	0.813597	1.2207e-20
DVDAAYMNKVELEAK	K2C75_HUMAN	O95678	K.DVDAAYMNKVELEAK.V	20.145	22	0.99013	1	0.813597	1.2207e-20
DVDAAYMNKVELQAK	K2C6A_HUMAN	P02538	K.DVDAAYMNKVELQAK.A	70.035	77	0.99113	1	0.96438	2.44141e-20
DVDAAYMNKVELQAK	K2C6B_HUMAN	P04259	K.DVDAAYMNKVELQAK.A	68.44	73	0.99113	1	0.96438	2.44141e-20
DVDAAYMNKVELQAK	K2C6C_HUMAN	P48668	K.DVDAAYMNKVELQAK.A	67.553	75	0.99113	1	0.96438	2.44141e-20
DVDAAYMNKVELQAK	K2C72_HUMAN	Q14CN4	K.DVDAAYMNKVELQAK.V	6.458	7	0.99113	1	0.96438	2.44141e-20
DVDGAYMTK	K2C1_HUMAN	P04264	K.DVDGAYMTK.V	66.77	58	0.99308	1	1.44686	1.95313e-13
DVDLEFLAK	TERA_HUMAN	P55072	K.DVDLEFLAK.M	12.655	8	0.99206	1	1.03353	1.75781e-12
DVEAWFFSK	K1C15_HUMAN	P19012	R.DVEAWFFSK.T	27.412	19	0.99359	1	1.18844	2.05078e-13
DVFLGMFLYEYAR	ALBU_HUMAN	Q9P157	K.DVFLGMFLYEYAR.R	41.544	47	0.98003	1	0.4732	4.88281e-18
DVLDGHLR	DESP_HUMAN	P15924	R.DVLDGHLR.E	49.739	138	0.98862	1	0.840189	1.5625e-11
DVLGMAQDEMAQAFEDWNKTELDSFLIEITANILK	6PGD_HUMAN	P52209	K.DVLGMAQDEMAQAFEDWNKTELDSFLIEITANILK.F	41.615	17	0.99409	1	1.33404	2.35495e-24
DVNAAIAAIK	TBA4A_HUMAN	P68366	K.DVNAAIAAIK.T	34.598	13	0.99317	1	0.837226	3.90625e-14
DVNAAIATIK	TBA1A_HUMAN	Q71U36	K.DVNAAIATIK.T	37.694	14	0.99267	1	0.867362	3.90625e-14
DVNAAIATIK	TBA1B_HUMAN	P68363	K.DVNAAIATIK.T	40.798	15	0.99267	1	0.867362	3.90625e-14
DVNAAIATIK	TBA1C_HUMAN	Q9BQE3	K.DVNAAIATIK.T	40.98	15	0.99267	1	0.867362	3.90625e-14
DVNAAIATIK	TBA3C_HUMAN	Q13748	K.DVNAAIATIK.T	32.444	12	0.99267	1	0.867362	3.90625e-14
DVNAAIATIK	TBA3E_HUMAN	Q6PEY2	K.DVNAAIATIK.T	26.222	9	0.99267	1	0.867362	3.90625e-14
DVNDWVGPPNDNGVTK	AMY1_HUMAN	P04745	K.DVNDWVGPPNDNGVTK.E	65.362	60	0.99254	1	-0.168096	3.15044e-20
DVNQQEFVR	RS19_HUMAN	P39019	K.DVNQQEFVR.A	16.552	2	0.99372	1	0.630411	1.04304e-12
DVTVLQNTDGNNNEAWAK	TRFL_HUMAN	Q8TCD2	K.DVTVLQNTDGNNNEAWAK.D	34.085	34	0.99328	1	0.416414	6.72516e-23
DWIDGVLNNPGPG	CAP7_HUMAN	P20160	R.DWIDGVLNNPGPG.P	15.139	5	0.99289	1	1.07205	1.2335e-12
DYAEVGR	HPT_HUMAN	P00738	K.DYAEVGR.V	18.966	10	0.97239	1	0.740625	7.8125e-11
DYFGAHTYELLAKPGQFIHTNWTGHGGTVSSSSYNA	6PGD_HUMAN	P52209	R.DYFGAHTYELLAKPGQFIHTNWTGHGGTVSSSSYNA.-	41.615	17	0.99112	1	0.474901	4.87314e-19
DYFPEPV	IGHG1_HUMAN	P01857	K.DYFPEPV.T	34.848	16	0.97393	1	-0.0810043	7.8125e-11
DYFPEPV	IGHG2_HUMAN	P01859	K.DYFPEPV.T	30.982	12	0.97393	1	-0.0810043	7.8125e-11
DYFPEPV	IGHG3_HUMAN	P01860	K.DYFPEPV.T	22.546	13	0.97393	1	-0.0810043	7.8125e-11
DYFPEPV	IGHG4_HUMAN	P01861	K.DYFPEPV.T	29.052	14	0.97393	1	-0.0810043	7.8125e-11
DYFPEPVTV	IGHG1_HUMAN	P01857	K.DYFPEPVTV.S	34.848	16	0.99353	1	1.09685	1.95313e-13
DYFPEPVTV	IGHG2_HUMAN	P01859	K.DYFPEPVTV.S	30.982	12	0.99353	1	1.09685	1.95313e-13
DYFPEPVTV	IGHG3_HUMAN	P01860	K.DYFPEPVTV.S	22.546	13	0.99353	1	1.09685	1.95313e-13
DYFPEPVTV	IGHG4_HUMAN	P01861	K.DYFPEPVTV.S	29.052	14	0.99353	1	1.09685	1.95313e-13
DYLPLVLGPTAMR	PERM_HUMAN	P05164	R.DYLPLVLGPTAMR.K	29.396	23	0.99329	1	0.831548	1.16378e-14
DYPDFSPSVDAEAIQK	ANXA3_HUMAN	P12429	R.DYPDFSPSVDAEAIQK.A	31.579	8	0.9941	1	0.00376232	9.83134e-18
DYPVVSIEDPFDQDDWGAWQK	ENOA_HUMAN	Q6GMP2	K.DYPVVSIEDPFDQDDWGAWQK.F	64.977	24	0.99282	1	1.15575	1.78523e-18
DYQELMNTK	K2C1_HUMAN	P04264	R.DYQELMNTK.L	66.77	58	0.99365	1	0.538705	7.8125e-13
DYSPYFK	K1C14_HUMAN	P02533	K.DYSPYFK.T	60.593	45	0.99166	1	0.796157	7.8125e-11
DYSPYFK	K1C16_HUMAN	P08779	K.DYSPYFK.T	72.304	50	0.99166	1	0.796157	7.8125e-11
DYSPYYK	K1C13_HUMAN	P13646	R.DYSPYYK.T	69.869	59	0.99276	1	0.508558	7.8125e-11
DYVSQFEGSALGK	APOA1_HUMAN	P02647	R.DYVSQFEGSALGK.Q	63.296	16	0.99388	1	0.46547	5.27374e-18
EAAEKEQELLK	GBP6_HUMAN	Q6ZN66	K.EAAEKEQELLK.Q	35.387	19	0.99156	1	1.49735	2.16926e-12
EAAENSLVAYK	1433E_HUMAN	P62258	K.EAAENSLVAYK.A	19.608	5	0.99362	1	0.597105	7.76612e-14
EADDIVNWLK	PDIA1_HUMAN	P07237	R.EADDIVNWLK.K	48.819	20	0.99367	1	1.08589	3.90625e-14
EAEAAIYHLQLFEELRR	KPYM_HUMAN	Q9BWB5	R.EAEAAIYHLQLFEELRR.L	49.153	22	0.99186	1	1.81838	4.14213e-16
EAEVLLLQQR	PEPL_HUMAN	O60437	R.EAEVLLLQQR.V	32.517	52	0.99408	1	0.626298	6.25e-13
EAFQLFDR	MYL6_HUMAN	P60660	K.EAFQLFDR.T	40.397	5	0.99413	1	1.00596	1.5625e-11
EAINVEQAFQTIAR	RAB7A_HUMAN	P51149	K.EAINVEQAFQTIAR.N	16.425	3	0.99285	1	1.43138	1.62326e-15
EAVHVTVPDAITEWK	A2ML1_HUMAN	A8K2U0	K.EAVHVTVPDAITEWK.A	27.854	29	0.99357	1	1.10003	1.34583e-19
EAYPGDVFYLHSR	ATPA_HUMAN	P25705	R.EAYPGDVFYLHSR.L	20.253	7	0.99302	1	1.1597	6.83594e-17
EDAIWNLLR	TRFL_HUMAN	Q8TCD2	K.EDAIWNLLR.Q	34.085	34	0.99415	1	1.06522	1.75098e-12
EDGGGWWYNR	FIBB_HUMAN	P02675	K.EDGGGWWYNR.C	26.477	10	0.99379	1	0.923044	2.00195e-14
EEGLILFDQIPVSSGFSK	MUC5B_HUMAN	Q7M4S5	K.EEGLILFDQIPVSSGFSK.N	6.265	25	0.99309	1	0.129465	1.3916e-22
EEKPAVTAAPKK	CRYAB_HUMAN	P02511	R.EEKPAVTAAPKK.-	42.857	5	0.99296	1	0.832996	5.17513e-13
EELPNYLVTLPAR	A2ML1_HUMAN	A8K2U0	A.EELPNYLVTLPAR.L	27.854	29	0.99406	1	0.693744	1.7627e-16
EERGPGVPFQR	LEG7_HUMAN	P47929	R.EERGPGVPFQR.G	56.618	11	0.80198	1	1.1373	3.12267e-12
EESGKPGAHVTVK	ROA2_HUMAN	P22626	R.EESGKPGAHVTVK.K	9.348	2	0.88137	1	-0.0607015	4.88281e-18
EFADSLGIPFLETSAK	RAB1A_HUMAN	P62820	K.EFADSLGIPFLETSAK.N	13.171	2	0.99147	1	0.662638	1.79478e-12
EFADSLGIPFLETSAK	RAB1B_HUMAN	Q9H0U4	K.EFADSLGIPFLETSAK.N	21.891	3	0.99147	1	0.662638	1.79478e-12
EFADSLGIPFLETSAK	RAB1C_HUMAN	Q92928	K.EFADSLGIPFLETSAK.N	21.891	3	0.99147	1	0.662638	1.79478e-12
EFLVLVFK	CRNN_HUMAN	Q9UBG3	K.EFLVLVFK.V	54.141	18	0.99264	1	1.39162	1.5625e-11
EFPFYGDYGSNY	HIS1_HUMAN	P15515	R.EFPFYGDYGSNY.L	28.07	7	0.99375	1	0.97319	2.10953e-16
EFPFYGDYGSNYL	HIS1_HUMAN	P15515	R.EFPFYGDYGSNYL.Y	28.07	7	0.99276	1	0.773878	1.38221e-14
EFPFYGDYGSNYLY	HIS1_HUMAN	P15515	R.EFPFYGDYGSNYLY.D	28.07	7	0.99246	1	0.238042	5.90395e-15
EFPFYGDYGSNYLYDN	HIS1_HUMAN	P15515	R.EFPFYGDYGSNYLYDN.-	28.07	7	0.99209	1	0.611373	3.33971e-18
EFPGFLENQKDPLAVDK	S10AA_HUMAN	P60903	K.EFPGFLENQKDPLAVDK.I	45.361	3	0.99309	1	0.883874	3.07766e-19
EFSIDVGYER	ARP3_HUMAN	P61158	K.EFSIDVGYER.F	10.766	4	0.99356	1	0.951991	3.90625e-14
EFTPPVQAAYQK	HBB_HUMAN	Q549N7	K.EFTPPVQAAYQK.V	80.952	12	0.99327	1	0.71881	1.07422e-16
EGDLIAAQAR	LMNA_HUMAN	P02545	K.EGDLIAAQAR.L	24.096	14	0.99399	1	0.868168	9.17969e-12
EGDVQLNFDMPFIFAEVNADR	TGM3_HUMAN	Q08188	R.EGDVQLNFDMPFIFAEVNADR.I	58.297	45	0.99261	1	0.525819	9.00749e-20
EGDVQLNFDMPFIFAEVNADRI	TGM3_HUMAN	Q08188	R.EGDVQLNFDMPFIFAEVNADRI.T	58.297	45	0.99166	1	1.07341	2.17944e-20
EGDVQLNFDMPFIFAEVNADRITWLYDNTTGK	TGM3_HUMAN	Q08188	R.EGDVQLNFDMPFIFAEVNADRITWLYDNTTGK.Q	58.297	45	0.99176	1	0.843372	1.53718e-18
EGDVQLNFDMPFIFAEVNADRITWLYDNTTGKQWK	TGM3_HUMAN	Q08188	R.EGDVQLNFDMPFIFAEVNADRITWLYDNTTGKQWK.N	58.297	45	0.99287	1	0.0600578	8.12245e-16
EGEDNSKRNPIAK	DSG1_HUMAN	Q02413	R.EGEDNSKRNPIAK.I	15.253	10	0.9929	1	0.434604	2.04539e-13
EGEDNSKRNPIAK	DSG3_HUMAN	P32926	R.EGEDNSKRNPIAK.I	9.61	7	0.9929	1	0.434604	2.04539e-13
EGFGHLSPTGTTEFWLGNEK	FIBG_HUMAN	Q9UC63	K.EGFGHLSPTGTTEFWLGNEK.I	20.971	7	0.99324	1	1.01431	7.52332e-24
EGIPALDNFLDKL	EF2_HUMAN	P13639	K.EGIPALDNFLDKL.-	33.566	23	0.99211	1	0.407685	9.02344e-16
EGITVTGNR	GBP6_HUMAN	Q6ZN66	R.EGITVTGNR.L	35.387	19	0.99259	1	1.26654	1.60156e-11
EGLLAIFK	CTNB1_HUMAN	P35222	R.EGLLAIFK.S	2.433	2	0.99289	1	1.12082	3.125e-11
EGLLAIFK	PLAK_HUMAN	P14923	R.EGLLAIFK.S	42.55	30	0.99289	1	1.12082	3.125e-11
EGMLVVNGVDLLSSR	TGM1_HUMAN	P22735	R.EGMLVVNGVDLLSSR.S	26.683	16	0.99396	1	0.379701	1.19176e-16
EGMNIVEAMER	PPIA_HUMAN	P62937	K.EGMNIVEAMER.F	43.03	9	0.99406	1	0.802458	9.76563e-16
EGSGLLLGNLK	TGM3_HUMAN	Q08188	V.EGSGLLLGNLK.I	58.297	45	0.98798	1	1.17995	4.2207e-12
EGVHGGLINK	PROF1_HUMAN	P07737	K.EGVHGGLINK.K	68.571	10	0.9897	1	0.828516	3.90625e-14
EGVHGGLINKK	PROF1_HUMAN	P07737	K.EGVHGGLINKK.C	68.571	10	0.99048	1	0.750622	3.90625e-15
EGVIIEILASR	ANXA8_HUMAN	P13928	K.EGVIIEILASR.T	11.621	4	0.99263	1	1.33462	3.4375e-13
EGVIIEILASR	AXA81_HUMAN	Q5T2P8	K.EGVIIEILASR.T	11.621	4	0.99263	1	1.33462	3.4375e-13
EGVIIEILASR	AXA82_HUMAN	Q5VT79	K.EGVIIEILASR.T	11.621	4	0.99263	1	1.33462	3.4375e-13
EGYYGYTGAFR	TRFE_HUMAN	P02787	K.EGYYGYTGAFR.C	29.37	20	0.99361	1	0.844638	1.09985e-15
EHALLAYTLGVK	EF1A1_HUMAN	P68104	R.EHALLAYTLGVK.Q	36.58	16	0.99316	1	0.598142	1.95313e-16
EHALLAYTLGVK	EF1A2_HUMAN	Q05639	R.EHALLAYTLGVK.Q	18.79	9	0.99316	1	0.598142	1.95313e-16
EHALLAYTLGVK	EF1A3_HUMAN	Q5VTE0	R.EHALLAYTLGVK.Q	36.58	16	0.99316	1	0.598142	1.95313e-16
EHHTDEYEYDELIVR	TGM1_HUMAN	P22735	R.EHHTDEYEYDELIVR.R	26.683	16	0.99292	1	0.914137	1.2207e-20
EHLMLEEELR	DESP_HUMAN	P15924	K.EHLMLEEELR.N	49.739	138	0.99426	1	1.40895	1.55078e-13
EHNPVRGPDGK	ISK5_HUMAN	Q9NQ38	R.EHNPVRGPDGK.M	4.229	4	0.97391	1	0.435084	3.90625e-15
EHVAHLLFLR	A1AG2_HUMAN	P19652	R.EHVAHLLFLR.D	9.453	2	0.99415	1	0.846885	2.42212e-13
EIAQDFKTDLR	H33_HUMAN	P84243	R.EIAQDFKTDLR.F	21.324	2	0.98559	1	1.30982	1.5625e-14
EIDAYGQQLR	EVPL_HUMAN	Q92817	K.EIDAYGQQLR.S	19.97	31	0.99341	1	0.562778	1.5625e-13
EIGELYLPK	AACT_HUMAN	Q6NSC9	R.EIGELYLPK.F	4.492	2	0.9788	1	0.655396	1.7627e-12
EIIDLVLDR	TBA1A_HUMAN	Q71U36	K.EIIDLVLDR.I	37.694	14	0.99341	1	1.1358	3.125e-12
EIIDLVLDR	TBA1B_HUMAN	P68363	K.EIIDLVLDR.I	40.798	15	0.99341	1	1.1358	3.125e-12
EIIDLVLDR	TBA1C_HUMAN	Q9BQE3	K.EIIDLVLDR.I	40.98	15	0.99341	1	1.1358	3.125e-12
EIKPLAQSHATK	MYG_HUMAN	P02144	A.EIKPLAQSHATK.H	24.026	6	0.99254	0.755505	0.536643	7.8125e-15
EILELAGNAAR	H2A1B_HUMAN	P04908	A.EILELAGNAAR.D	57.692	14	0.99313	1	0.31325	3.90625e-14
EILELAGNAAR	H2A1C_HUMAN	Q93077	A.EILELAGNAAR.D	63.077	15	0.99313	1	0.31325	3.90625e-14
EILELAGNAAR	H2A1D_HUMAN	P20671	A.EILELAGNAAR.D	57.692	14	0.99313	1	0.31325	3.90625e-14
EILELAGNAAR	H2A1H_HUMAN	Q96KK5	A.EILELAGNAAR.D	64.062	15	0.99313	1	0.31325	3.90625e-14
EILELAGNAAR	H2A1J_HUMAN	Q99878	A.EILELAGNAAR.D	64.062	15	0.99313	1	0.31325	3.90625e-14
EILELAGNAAR	H2A1_HUMAN	P0C0S8	A.EILELAGNAAR.D	63.077	15	0.99313	1	0.31325	3.90625e-14
EILELAGNAAR	H2A2A_HUMAN	Q6FI13	A.EILELAGNAAR.D	63.077	16	0.99313	1	0.31325	3.90625e-14
EILELAGNAAR	H2A2B_HUMAN	Q8IUE6	A.EILELAGNAAR.D	49.231	12	0.99313	1	0.31325	3.90625e-14
EILELAGNAAR	H2A2C_HUMAN	Q16777	A.EILELAGNAAR.D	63.566	16	0.99313	1	0.31325	3.90625e-14
EILELAGNAAR	H2A3_HUMAN	Q7L7L0	A.EILELAGNAAR.D	57.692	14	0.99313	1	0.31325	3.90625e-14
EILELAGNAAR	H2AJ_HUMAN	Q9BTM1	A.EILELAGNAAR.D	63.566	15	0.99313	1	0.31325	3.90625e-14
EILELAGNAAR	H2AX_HUMAN	P16104	A.EILELAGNAAR.D	39.86	11	0.99313	1	0.31325	3.90625e-14
EILELAGNAAR	H2AY_HUMAN	O75367	A.EILELAGNAAR.D	5.914	9	0.99313	1	0.31325	3.90625e-14
EIPAWVPFDPAAQITK	ZA2G_HUMAN	P25311	K.EIPAWVPFDPAAQITK.Q	43.96	13	0.99319	1	0.149276	7.61974e-17
EIQALKDTKPQVQTK	PEPL_HUMAN	O60437	K.EIQALKDTKPQVQTK.E	32.517	52	0.99339	1	1.53526	5.99365e-19
EISLWFKPEELVDYK	NDKB_HUMAN	P22392	K.EISLWFKPEELVDYK.S	41.447	5	0.99312	1	1.54303	3.20985e-15
EITALAPSTMK	ACTA_HUMAN	P62736	K.EITALAPSTMK.I	46.154	28	0.99398	1	0.477852	1.95313e-15
EITALAPSTMK	ACTB_HUMAN	Q96HG5	K.EITALAPSTMK.I	80.8	48	0.99398	1	0.477852	1.95313e-15
EITALAPSTMK	ACTC_HUMAN	P68032	K.EITALAPSTMK.I	48.806	32	0.99398	1	0.477852	1.95313e-15
EITALAPSTMK	ACTG_HUMAN	P63261	K.EITALAPSTMK.I	80.8	48	0.99398	1	0.477852	1.95313e-15
EITALAPSTMK	ACTH_HUMAN	P63267	K.EITALAPSTMK.I	46.277	28	0.99398	1	0.477852	1.95313e-15
EITALAPSTMK	ACTS_HUMAN	P68133	K.EITALAPSTMK.I	45.093	30	0.99398	1	0.477852	1.95313e-15
EIVLTQSPATLSLSPGER	KV309_HUMAN	P04433	G.EIVLTQSPATLSLSPGER.A	35.652	3	0.99375	1	0.825982	8.04444e-19
EIVLTQSPGTLSLSPGER	KV302_HUMAN	P01620	-.EIVLTQSPGTLSLSPGER.A	39.45	4	0.99119	1	-0.319065	1.51825e-20
EIVLTQSPGTLSLSPGER	KV303_HUMAN	P01621	G.EIVLTQSPGTLSLSPGER.A	40	2	0.99119	1	-0.319065	1.51825e-20
EIVLTQSPGTLSLSPGER	KV304_HUMAN	P01622	-.EIVLTQSPGTLSLSPGER.A	31.193	3	0.99119	1	-0.319065	1.51825e-20
EIVLTQSPGTLSLSPGER	KV305_HUMAN	P01623	-.EIVLTQSPGTLSLSPGER.A	39.45	4	0.99119	1	-0.319065	1.51825e-20
EIVLTQSPGTLSLSPGER	KV307_HUMAN	P04206	-.EIVLTQSPGTLSLSPGER.A	31.193	3	0.99119	1	-0.319065	1.51825e-20
EIVLTQSPGTLSLSPGER	KV312_HUMAN	P18135	G.EIVLTQSPGTLSLSPGER.A	50.388	5	0.99119	1	-0.319065	1.51825e-20
EIVLTQSPGTLSLSPGER	KV313_HUMAN	P18136	G.EIVLTQSPGTLSLSPGER.A	50.388	5	0.99119	1	-0.319065	1.51825e-20
EIVMTQSPATLSVSPGER	KV308_HUMAN	P04207	G.EIVMTQSPATLSVSPGER.A	20.93	2	0.99308	1	0.767456	5.95466e-18
EIVNKHNELR	CRIS3_HUMAN	P54108	R.EIVNKHNELR.R	20.816	5	0.99298	1	0.252264	7.8125e-14
EIVNKHNELRR	CRIS3_HUMAN	P54108	R.EIVNKHNELRR.A	20.816	5	0.99254	1	0.0110892	2.65607e-13
EKLEATINELV	THIO_HUMAN	P10599	K.EKLEATINELV.-	46.667	9	0.99363	1	0.857689	5.43779e-13
EKPAGGIPVLGSLVNTVLK	LPLC1_HUMAN	Q9H4V6	R.EKPAGGIPVLGSLVNTVLK.H	45.041	20	0.99423	1	1.05361	5.27737e-21
EKPLALYMFSSNDK	AL3A1_HUMAN	P30838	R.EKPLALYMFSSNDK.V	30.243	11	0.99317	1	1.93001	2.74472e-15
EKPLALYMFSSNDKVIKK	AL3A1_HUMAN	P30838	R.EKPLALYMFSSNDKVIKK.M	30.243	11	0.97875	1	0.98339	4.2677e-13
EKQLAAENR	MYH9_HUMAN	P35579	R.EKQLAAENR.L	15.357	24	0.98825	1	1.69987	3.90625e-12
EKSAIYQLEEEYENLLK	DESP_HUMAN	P15924	R.EKSAIYQLEEEYENLLK.A	49.739	138	0.99329	1	1.38548	3.05146e-19
EKWLPYEAGQR	DESP_HUMAN	P15924	K.EKWLPYEAGQR.F	49.739	138	0.99212	1	0.929862	1.79121e-13
EKYLTWASR	IGHA1_HUMAN	P01876	R.EKYLTWASR.Q	44.476	16	0.99398	1	1.1593	7.8125e-13
EKYLTWASR	IGHA2_HUMAN	P01877	R.EKYLTWASR.Q	36.176	13	0.99398	1	1.1593	7.8125e-13
ELAILLGMLDPAEKDEK	PRDX6_HUMAN	P30041	R.ELAILLGMLDPAEKDEK.G	41.071	6	0.99395	1	1.03387	1.61131e-15
ELASQPDVDGFLVGGASLKPEFVDIINAK	TPIS_HUMAN	P60174	K.ELASQPDVDGFLVGGASLKPEFVDIINAK.Q	53.012	9	0.99296	1	0.106387	2.57448e-21
ELDESLQVAER	CLUS_HUMAN	P10909	R.ELDESLQVAER.L	18.931	6	0.99373	1	0.251703	3.90625e-15
ELDRDTVFALVNYIFFK	A1AT_HUMAN	Q86U18	K.ELDRDTVFALVNYIFFK.G	39.952	14	0.99243	1	1.32201	1.58521e-16
ELDVEVSR	PEPL_HUMAN	O60437	R.ELDVEVSR.L	32.517	52	0.98777	1	1.03535	7.8125e-12
ELEDATETADAMNR	MYH9_HUMAN	P35579	R.ELEDATETADAMNR.E	15.357	24	0.99429	1	0.324414	1.2207e-19
ELGVGIALR	FABP5_HUMAN	Q01469	K.ELGVGIALR.K	20.741	4	0.99357	1	0.774698	1.5625e-12
ELGVGIALRK	FABP5_HUMAN	Q01469	K.ELGVGIALRK.M	20.741	4	0.99306	1	1.31162	1.5625e-13
ELISNASDALDKIR	ENPL_HUMAN	P14625	R.ELISNASDALDKIR.L	3.487	2	0.99034	1	1.39472	1.95313e-18
ELISNASDALDKIR	H90B2_HUMAN	Q58FF8	W.ELISNASDALDKIR.Y	18.373	6	0.99034	1	1.39472	1.95313e-18
ELISNASDALDKIR	H90B3_HUMAN	Q58FF7	Q.ELISNASDALDKIR.Y	12.563	6	0.99034	1	1.39472	1.95313e-18
ELISNASDALDKIR	H90B4_HUMAN	Q58FF6	Q.ELISNASDALDKIR.Y	8.119	3	0.99034	1	1.39472	1.95313e-18
ELISNASDALDKIR	HS90B_HUMAN	P08238	R.ELISNASDALDKIR.Y	24.171	15	0.99034	1	1.39472	1.95313e-18
ELNHMLSDTGNR	S10AG_HUMAN	Q96FQ6	K.ELNHMLSDTGNR.K	67.961	9	0.99377	1	1.22918	9.76563e-17
ELNHMLSDTGNRK	S10AG_HUMAN	Q96FQ6	K.ELNHMLSDTGNRK.A	67.961	9	0.99256	1	1.52715	9.76563e-18
ELPGFLQSGK	S100P_HUMAN	P25815	K.ELPGFLQSGK.D	24.211	2	0.9878	1	1.22002	1.66016e-13
ELPSFVGEK	S10A2_HUMAN	P29034	K.ELPSFVGEK.V	17.347	3	0.98726	1	0.99391	7.8125e-13
ELPSFVGEKVDEEGLK	S10A2_HUMAN	P29034	K.ELPSFVGEKVDEEGLK.K	17.347	3	0.99292	1	0.654798	6.20929e-20
ELPSFVGEKVDEEGLKK	S10A2_HUMAN	P29034	K.ELPSFVGEKVDEEGLKK.L	17.347	3	0.99377	1	0.666161	1.90267e-21
ELQNAHNGVNQASK	SBSN_HUMAN	Q6UWP8	K.ELQNAHNGVNQASK.E	46.964	9	0.99025	1	0.058062	1.69556e-18
ELSDIAHR	ALDOA_HUMAN	P04075	K.ELSDIAHR.I	34.341	13	0.93689	1	1.17917	3.125e-11
ELSEALGQIFDSQR	LG3BP_HUMAN	Q08380	R.ELSEALGQIFDSQR.G	23.077	11	0.99267	1	0.692179	1.95313e-18
ELSTVQESFLVK	A2ML1_HUMAN	A8K2U0	K.ELSTVQESFLVK.I	27.854	29	0.99302	1	0.129322	4.10156e-16
ELTSELKENFIR	NGAL_HUMAN	P80188	K.ELTSELKENFIR.F	39.394	8	0.99386	1	0.985805	7.8125e-16
ELTVSNNDINEAGVR	RINI_HUMAN	P13489	K.ELTVSNNDINEAGVR.V	5.64	2	0.9927	1	0.285864	4.61426e-19
EMDATPGIDLTR	K1C13_HUMAN	P13646	V.EMDATPGIDLTR.V	69.869	59	0.99368	1	0.734732	7.56836e-15
EMNDAAMFYTNR	CAP1_HUMAN	Q01518	K.EMNDAAMFYTNR.V	14.316	5	0.99313	1	0.607553	2.7832e-16
EMPPTNPIR	1433S_HUMAN	P31947	K.EMPPTNPIR.L	64.919	17	0.98213	1	0.304311	3.90625e-13
EMQPTHPIR	1433B_HUMAN	P31946	K.EMQPTHPIR.L	36.179	8	0.9927	1	0.78624	5.74219e-12
EMQPTHPIR	1433T_HUMAN	P27348	K.EMQPTHPIR.L	22.449	5	0.9927	1	0.78624	5.74219e-12
EMQPTHPIR	1433Z_HUMAN	Q6NUR9	K.EMQPTHPIR.L	53.878	14	0.9927	1	0.78624	5.74219e-12
ENKKFPVFK	CYTB_HUMAN	P04080	K.ENKKFPVFK.A	70.408	10	0.98969	1	1.18497	1.5625e-12
ENNPVRGPYGK	ISK5_HUMAN	Q9NQ38	R.ENNPVRGPYGK.M	4.229	4	0.99372	1	1.09864	4.10339e-14
ENTQQHITAR	CATG_HUMAN	P08311	R.ENTQQHITAR.R	29.412	10	0.9739	1	0.198899	1.25e-13
EPGQDLVVLPLSITTDFIPSFR	CO3_HUMAN	P01024	R.EPGQDLVVLPLSITTDFIPSFR.L	20.204	22	0.99309	1	1.23505	1.01063e-18
EPQVYTLPPSREEMTK	IGHG2_HUMAN	P01859	R.EPQVYTLPPSREEMTK.N	30.982	12	0.98401	1	0.478273	3.99937e-17
EPQVYTLPPSREEMTK	IGHG3_HUMAN	P01860	R.EPQVYTLPPSREEMTK.N	22.546	13	0.98401	1	0.478273	3.99937e-17
EQFLDGDGWTSR	CALR_HUMAN	P27797	K.EQFLDGDGWTSR.W	16.067	4	0.99412	1	0.51638	1.46484e-16
EQGQTQTQPGSGQR	CRNN_HUMAN	Q9UBG3	R.EQGQTQTQPGSGQR.W	54.141	18	0.99402	1	2.03253	1.4046e-16
EQGVLSFWR	ADT2_HUMAN	P05141	K.EQGVLSFWR.G	14.43	4	0.99395	1	1.25999	7.8125e-13
EQGVLSFWR	ADT3_HUMAN	P12236	K.EQGVLSFWR.G	14.43	4	0.99395	1	1.25999	7.8125e-13
EQIKTLNNK	K22E_HUMAN	P35908	R.EQIKTLNNK.F	40.845	30	0.99254	1	0.0191422	3.125e-12
EQIKTLNNK	K22O_HUMAN	Q01546	R.EQIKTLNNK.F	46.082	34	0.99254	1	0.0191422	3.125e-12
EQIKTLNNK	K2C3_HUMAN	P12035	R.EQIKTLNNK.F	32.006	23	0.99254	1	0.0191422	3.125e-12
EQIKTLNNK	K2C5_HUMAN	P13647	R.EQIKTLNNK.F	65.932	71	0.99254	1	0.0191422	3.125e-12
EQIKTLNNK	K2C6A_HUMAN	P02538	R.EQIKTLNNK.F	70.035	77	0.99254	1	0.0191422	3.125e-12
EQIKTLNNK	K2C6B_HUMAN	P04259	R.EQIKTLNNK.F	68.44	73	0.99254	1	0.0191422	3.125e-12
EQIKTLNNK	K2C6C_HUMAN	P48668	R.EQIKTLNNK.F	67.553	75	0.99254	1	0.0191422	3.125e-12
EQIKTLNNK	K2C75_HUMAN	O95678	R.EQIKTLNNK.F	20.145	22	0.99254	1	0.0191422	3.125e-12
EQIKTLNNK	K2C79_HUMAN	Q5XKE5	R.EQIKTLNNK.F	13.084	12	0.99254	1	0.0191422	3.125e-12
EQIKTLNNK	K2C7_HUMAN	P08729	S.EQIKTLNNK.F	10.235	7	0.99254	1	0.0191422	3.125e-12
EQIKTLNNK	K2C8_HUMAN	Q6P4C7	K.EQIKTLNNK.F	10.145	9	0.99254	1	0.0191422	3.125e-12
EQIKTLNNK	KRT84_HUMAN	Q9NSB2	K.EQIKTLNNK.F	5.833	5	0.99254	1	0.0191422	3.125e-12
EQIMMLEHTQK	GBP6_HUMAN	Q6ZN66	R.EQIMMLEHTQK.V	35.387	19	0.99408	1	1.16625	7.8125e-15
EQINALTSFLDASFVYSSEPSLASR	PERL_HUMAN	P22079	R.EQINALTSFLDASFVYSSEPSLASR.L	32.865	16	0.99085	1	-0.140591	2.30109e-24
EQLGPVTQEFWDNLEKETEGLRQEMSK	APOA1_HUMAN	P02647	R.EQLGPVTQEFWDNLEKETEGLRQEMSK.D	63.296	16	0.99359	1	0.630734	7.24903e-19
EQLKAVMDDFAAFVEK	ALBU_HUMAN	Q9P157	K.EQLKAVMDDFAAFVEK.C	41.544	47	0.99318	1	0.765745	2.44141e-21
EQLLELPEQQEGHLK	INVO_HUMAN	P07476	K.EQLLELPEQQEGHLK.H	34.359	17	0.99289	1	1.398	4.35011e-14
EQSSSSFSQGQSS	K1C16_HUMAN	P08779	K.EQSSSSFSQGQSS.-	72.304	50	0.99289	1	0.342942	4.23373e-17
EQTFGGVNYFFDVEVGR	CYTS_HUMAN	P01036	R.EQTFGGVNYFFDVEVGR.T	60.993	15	0.99343	1	-0.073768	1.52588e-23
EQVANSAFVER	H90B3_HUMAN	Q58FF7	K.EQVANSAFVER.V	12.563	6	0.99358	1	0.430719	9.76563e-16
EQVANSAFVER	HS90B_HUMAN	P08238	K.EQVANSAFVER.V	24.171	15	0.99358	1	0.430719	9.76563e-16
EQYEAMAER	K1C13_HUMAN	P13646	R.EQYEAMAER.N	69.869	59	0.99298	1	1.01735	3.90625e-13
ERENLRQEIEK	DESP_HUMAN	P15924	R.ERENLRQEIEK.F	49.739	138	0.93799	1	1.27035	1.07628e-12
ERIEQDYWQVPR	GBP6_HUMAN	Q6ZN66	K.ERIEQDYWQVPR.K	35.387	19	0.99295	1	0.835584	1.33467e-15
ESHRLPVDIAYKR	DESP_HUMAN	P15924	K.ESHRLPVDIAYKR.G	49.739	138	0.99294	1	0.685216	4.67095e-16
ESKKEDLVFIFWAPESAPLK	COF1_HUMAN	P23528	K.ESKKEDLVFIFWAPESAPLK.S	50	7	0.9931	1	1.31702	9.21252e-22
ESKKEDLVFIFWAPESAPLK	COF2_HUMAN	Q9Y281	K.ESKKEDLVFIFWAPESAPLK.S	18.675	4	0.9931	1	1.31702	9.21252e-22
ESPGQLSDYRVENSMYIINPWVYLER	CF058_HUMAN	Q6P5S2	K.ESPGQLSDYRVENSMYIINPWVYLER.M	33.939	8	0.99372	1	0.515468	3.40353e-21
ESSNVVVTER	DSG1_HUMAN	Q02413	R.ESSNVVVTER.V	15.253	10	0.9934	1	1.47359	2.24609e-14
ETQSQLETER	DESP_HUMAN	P15924	R.ETQSQLETER.S	49.739	138	0.9942	1	0.6153	7.8125e-14
ETTDTDTADQVIASFK	ACTN4_HUMAN	O43707	R.ETTDTDTADQVIASFK.V	42.371	27	0.99316	1	0.536304	7.32422e-22
EVAAFAQFGSDLDAATQQLLSR	ATPA_HUMAN	P25705	R.EVAAFAQFGSDLDAATQQLLSR.G	20.253	7	0.99286	1	0.936607	1.60629e-22
EVASNSELVQSSR	K1C16_HUMAN	P08779	K.EVASNSELVQSSR.S	72.304	50	0.99407	1	1.05732	4.88281e-18
EVATNSELVQSGK	K1C14_HUMAN	P02533	R.EVATNSELVQSGK.S	60.593	45	0.99422	1	0.905942	4.88281e-18
EVATNSELVQSGK	K1C17_HUMAN	Q8N1P6	R.EVATNSELVQSGK.S	60.648	30	0.99422	1	0.905942	4.88281e-18
EVATNSELVQSGKSEISELRR	K1C14_HUMAN	P02533	R.EVATNSELVQSGKSEISELRR.T	60.593	45	0.99366	1	0.960191	6.79646e-17
EVATNSELVQSGKSEISELRR	K1C17_HUMAN	Q8N1P6	R.EVATNSELVQSGKSEISELRR.T	60.648	30	0.99366	1	0.960191	6.79646e-17
EVFTSSSSSSSR	K1C16_HUMAN	P08779	R.EVFTSSSSSSSR.Q	72.304	50	0.99304	1	0.271761	2.44141e-17
EVNLVLLLK	TGM3_HUMAN	Q08188	K.EVNLVLLLK.N	58.297	45	0.99305	1	1.12305	3.125e-12
EVQLVESGGGLVQPGGSLR	HV305_HUMAN	P01766	-.EVQLVESGGGLVQPGGSLR.L	15.833	2	0.99167	1	-0.0600214	9.81938e-22
EVQLVESGGGLVQPGGSLR	HV316_HUMAN	P01777	-.EVQLVESGGGLVQPGGSLR.L	15.966	2	0.99167	1	-0.0600214	9.81938e-22
EVSTNTAMIQTSK	K1C13_HUMAN	P13646	K.EVSTNTAMIQTSK.T	69.869	59	0.99247	1	0.1451	4.88281e-18
EVSTNTAMIQTSKTEITELRR	K1C13_HUMAN	P13646	K.EVSTNTAMIQTSKTEITELRR.T	69.869	59	0.99183	1	0.642022	3.8144e-16
EVTQVERDPGLDSQAAQLR	EVPL_HUMAN	Q92817	K.EVTQVERDPGLDSQAAQLR.I	19.97	31	0.99407	1	0.56905	5.02034e-16
EVVADSVWVDVK	CO3_HUMAN	P01024	R.EVVADSVWVDVK.D	20.204	22	0.9942	1	0.706704	2.44141e-17
EYFSWEGAFQHVGK	EF1G_HUMAN	P26641	R.EYFSWEGAFQHVGK.A	10.755	4	0.99274	1	1.69121	8.60452e-16
EYLTAEILELAGNAAR	H2A1B_HUMAN	P04908	L.EYLTAEILELAGNAAR.D	57.692	14	0.99355	1	1.65797	2.58666e-18
EYLTAEILELAGNAAR	H2A1C_HUMAN	Q93077	L.EYLTAEILELAGNAAR.D	63.077	15	0.99355	1	1.65797	2.58666e-18
EYLTAEILELAGNAAR	H2A1D_HUMAN	P20671	L.EYLTAEILELAGNAAR.D	57.692	14	0.99355	1	1.65797	2.58666e-18
EYLTAEILELAGNAAR	H2A1H_HUMAN	Q96KK5	L.EYLTAEILELAGNAAR.D	64.062	15	0.99355	1	1.65797	2.58666e-18
EYLTAEILELAGNAAR	H2A1J_HUMAN	Q99878	L.EYLTAEILELAGNAAR.D	64.062	15	0.99355	1	1.65797	2.58666e-18
EYLTAEILELAGNAAR	H2A1_HUMAN	P0C0S8	L.EYLTAEILELAGNAAR.D	63.077	15	0.99355	1	1.65797	2.58666e-18
EYLTAEILELAGNAAR	H2A2A_HUMAN	Q6FI13	L.EYLTAEILELAGNAAR.D	63.077	16	0.99355	1	1.65797	2.58666e-18
EYLTAEILELAGNAAR	H2A2B_HUMAN	Q8IUE6	L.EYLTAEILELAGNAAR.D	49.231	12	0.99355	1	1.65797	2.58666e-18
EYLTAEILELAGNAAR	H2A2C_HUMAN	Q16777	L.EYLTAEILELAGNAAR.D	63.566	16	0.99355	1	1.65797	2.58666e-18
EYLTAEILELAGNAAR	H2A3_HUMAN	Q7L7L0	L.EYLTAEILELAGNAAR.D	57.692	14	0.99355	1	1.65797	2.58666e-18
EYLTAEILELAGNAAR	H2AJ_HUMAN	Q9BTM1	L.EYLTAEILELAGNAAR.D	63.566	15	0.99355	1	1.65797	2.58666e-18
EYLTAEILELAGNAAR	H2AX_HUMAN	P16104	L.EYLTAEILELAGNAAR.D	39.86	11	0.99355	1	1.65797	2.58666e-18
EYLTAEILELAGNAAR	H2AY_HUMAN	O75367	L.EYLTAEILELAGNAAR.D	5.914	9	0.99355	1	1.65797	2.58666e-18
EYQDLLNVK	DESM_HUMAN	Q8TD99	R.EYQDLLNVK.M	4.681	2	0.98739	1	1.43274	2.36328e-12
EYQDLLNVK	GFAP_HUMAN	Q96P18	Q.EYQDLLNVK.L	4.861	3	0.98739	1	1.43274	2.36328e-12
EYQDLLNVK	VIME_HUMAN	Q96ML2	R.EYQDLLNVK.M	28.112	13	0.98739	1	1.43274	2.36328e-12
EYQELMNTK	K2C5_HUMAN	P13647	R.EYQELMNTK.L	65.932	71	0.99264	1	-0.0388904	8.39844e-13
EYQELMNVK	K2C6A_HUMAN	P02538	K.EYQELMNVK.L	70.035	77	0.99357	1	0.483103	7.8125e-13
EYQELMNVK	K2C6B_HUMAN	P04259	K.EYQELMNVK.L	68.44	73	0.99357	1	0.483103	7.8125e-13
EYQELMNVK	K2C6C_HUMAN	P48668	K.EYQELMNVK.L	67.553	75	0.99357	1	0.483103	7.8125e-13
EYQELMNVK	K2C8_HUMAN	Q6P4C7	R.EYQELMNVK.L	10.145	9	0.99357	1	0.483103	7.8125e-13
EYQELMSVK	K2C4_HUMAN	P19013	R.EYQELMSVK.L	74.532	75	0.99308	1	0.360894	7.8125e-13
EYQELMSVK	K2C7_HUMAN	P08729	R.EYQELMSVK.L	10.235	7	0.99308	1	0.360894	7.8125e-13
EYVNASEVSSGKPVSAR	ZN185_HUMAN	O15231	K.EYVNASEVSSGKPVSAR.Y	8.418	4	0.99306	1	1.11014	5.21851e-21
FAAATGATPIAGR	RSSA_HUMAN	Q86VC0	K.FAAATGATPIAGR.F	12.203	3	0.99089	1	0.58014	2.44141e-18
FADLSEAANR	VIME_HUMAN	Q96ML2	K.FADLSEAANR.N	28.112	13	0.99361	1	0.634588	1.95313e-14
FAEAFEAIPR	TCPQ_HUMAN	P50990	K.FAEAFEAIPR.A	4.015	2	0.99417	1	0.976529	1.17188e-13
FAGDKGYLTK	S10AA_HUMAN	P60903	K.FAGDKGYLTK.E	45.361	3	0.99331	1	1.12692	3.90625e-14
FAIQDISVEETSAK	ACTN1_HUMAN	P12814	R.FAIQDISVEETSAK.E	13.901	10	0.99312	1	0.39479	5.00488e-19
FAIQDISVEETSAK	ACTN2_HUMAN	P35609	R.FAIQDISVEETSAK.E	5.369	4	0.99312	1	0.39479	5.00488e-19
FAIQDISVEETSAK	ACTN3_HUMAN	Q08043	R.FAIQDISVEETSAK.E	2.442	2	0.99312	1	0.39479	5.00488e-19
FAIQDISVEETSAK	ACTN4_HUMAN	O43707	R.FAIQDISVEETSAK.E	42.371	27	0.99312	1	0.39479	5.00488e-19
FANYIDKVR	VIME_HUMAN	Q96ML2	R.FANYIDKVR.F	28.112	13	0.99243	1	1.11791	8.98438e-13
FAPDNEQNILWGLPLQYGWQYR	CF058_HUMAN	Q6P5S2	K.FAPDNEQNILWGLPLQYGWQYR.T	33.939	8	0.99356	1	0.51202	6.07056e-20
FASFIDKV	K22E_HUMAN	P35908	K.FASFIDKV.R	40.845	30	0.98536	1	0.823995	1.5625e-11
FASFIDKV	K22O_HUMAN	Q01546	K.FASFIDKV.R	46.082	34	0.98536	1	0.823995	1.5625e-11
FASFIDKV	K2C1B_HUMAN	Q7Z794	K.FASFIDKV.F	7.093	5	0.98536	1	0.823995	1.5625e-11
FASFIDKV	K2C1_HUMAN	P04264	Q.FASFIDKV.R	66.77	58	0.98536	1	0.823995	1.5625e-11
FASFIDKV	K2C3_HUMAN	P12035	K.FASFIDKV.R	32.006	23	0.98536	1	0.823995	1.5625e-11
FASFIDKV	K2C4_HUMAN	P19013	K.FASFIDKV.Q	74.532	75	0.98536	1	0.823995	1.5625e-11
FASFIDKV	K2C5_HUMAN	P13647	K.FASFIDKV.R	65.932	71	0.98536	1	0.823995	1.5625e-11
FASFIDKV	K2C6A_HUMAN	P02538	K.FASFIDKV.R	70.035	77	0.98536	1	0.823995	1.5625e-11
FASFIDKV	K2C6B_HUMAN	P04259	K.FASFIDKV.R	68.44	73	0.98536	1	0.823995	1.5625e-11
FASFIDKV	K2C6C_HUMAN	P48668	K.FASFIDKV.R	67.553	75	0.98536	1	0.823995	1.5625e-11
FASFIDKV	K2C71_HUMAN	Q3SY84	K.FASFIDKV.R	5.545	5	0.98536	1	0.823995	1.5625e-11
FASFIDKV	K2C72_HUMAN	Q14CN4	K.FASFIDKV.R	6.458	7	0.98536	1	0.823995	1.5625e-11
FASFIDKV	K2C73_HUMAN	Q86Y46	K.FASFIDKV.R	7.593	7	0.98536	1	0.823995	1.5625e-11
FASFIDKV	K2C74_HUMAN	Q7RTS7	K.FASFIDKV.R	3.97	4	0.98536	1	0.823995	1.5625e-11
FASFIDKV	K2C75_HUMAN	O95678	K.FASFIDKV.R	20.145	22	0.98536	1	0.823995	1.5625e-11
FASFIDKV	K2C78_HUMAN	Q8N1N4	Q.FASFIDKV.R	44.038	31	0.98536	1	0.823995	1.5625e-11
FASFIDKV	K2C79_HUMAN	Q5XKE5	K.FASFIDKV.R	13.084	12	0.98536	1	0.823995	1.5625e-11
FASFIDKV	K2C7_HUMAN	P08729	K.FASFIDKV.R	10.235	7	0.98536	1	0.823995	1.5625e-11
FASFIDKV	K2C8_HUMAN	Q6P4C7	K.FASFIDKV.R	10.145	9	0.98536	1	0.823995	1.5625e-11
FASFIDKV	KRT84_HUMAN	Q9NSB2	K.FASFIDKV.R	5.833	5	0.98536	1	0.823995	1.5625e-11
FASFIDKVQF	K2C4_HUMAN	P19013	K.FASFIDKVQF.L	74.532	75	0.99108	0.985561	1.39428	7.8125e-14
FASFIDKVQFLEQQNK	K2C4_HUMAN	P19013	K.FASFIDKVQFLEQQNK.V	74.532	75	0.99361	1	0.626842	9.76563e-21
FASFIDKVQFLEQQNKVLETK	K2C4_HUMAN	P19013	K.FASFIDKVQFLEQQNKVLETK.W	74.532	75	0.97987	1	0.47843	4.85182e-23
FASFIDKVR	K22E_HUMAN	P35908	K.FASFIDKVR.F	40.845	30	0.994	1	0.305753	7.8125e-13
FASFIDKVR	K22O_HUMAN	Q01546	K.FASFIDKVR.F	46.082	34	0.994	1	0.305753	7.8125e-13
FASFIDKVR	K2C1_HUMAN	P04264	Q.FASFIDKVR.F	66.77	58	0.994	1	0.305753	7.8125e-13
FASFIDKVR	K2C3_HUMAN	P12035	K.FASFIDKVR.F	32.006	23	0.994	1	0.305753	7.8125e-13
FASFIDKVR	K2C5_HUMAN	P13647	K.FASFIDKVR.F	65.932	71	0.994	1	0.305753	7.8125e-13
FASFIDKVR	K2C6A_HUMAN	P02538	K.FASFIDKVR.F	70.035	77	0.994	1	0.305753	7.8125e-13
FASFIDKVR	K2C6B_HUMAN	P04259	K.FASFIDKVR.F	68.44	73	0.994	1	0.305753	7.8125e-13
FASFIDKVR	K2C6C_HUMAN	P48668	K.FASFIDKVR.F	67.553	75	0.994	1	0.305753	7.8125e-13
FASFIDKVR	K2C71_HUMAN	Q3SY84	K.FASFIDKVR.F	5.545	5	0.994	1	0.305753	7.8125e-13
FASFIDKVR	K2C72_HUMAN	Q14CN4	K.FASFIDKVR.F	6.458	7	0.994	1	0.305753	7.8125e-13
FASFIDKVR	K2C73_HUMAN	Q86Y46	K.FASFIDKVR.F	7.593	7	0.994	1	0.305753	7.8125e-13
FASFIDKVR	K2C74_HUMAN	Q7RTS7	K.FASFIDKVR.F	3.97	4	0.994	1	0.305753	7.8125e-13
FASFIDKVR	K2C75_HUMAN	O95678	K.FASFIDKVR.F	20.145	22	0.994	1	0.305753	7.8125e-13
FASFIDKVR	K2C78_HUMAN	Q8N1N4	Q.FASFIDKVR.F	44.038	31	0.994	1	0.305753	7.8125e-13
FASFIDKVR	K2C79_HUMAN	Q5XKE5	K.FASFIDKVR.F	13.084	12	0.994	1	0.305753	7.8125e-13
FASFIDKVR	K2C7_HUMAN	P08729	K.FASFIDKVR.F	10.235	7	0.994	1	0.305753	7.8125e-13
FASFIDKVR	K2C8_HUMAN	Q6P4C7	K.FASFIDKVR.F	10.145	9	0.994	1	0.305753	7.8125e-13
FASFIDKVR	KRT84_HUMAN	Q9NSB2	K.FASFIDKVR.F	5.833	5	0.994	1	0.305753	7.8125e-13
FAYGYIEDLK	ILEU_HUMAN	P30740	K.FAYGYIEDLK.C	59.367	17	0.99364	1	0.650708	3.90625e-14
FDEAMADLHTLSEDSYKDSTLIMQLLR	1433S_HUMAN	P31947	T.FDEAMADLHTLSEDSYKDSTLIMQLLR.D	64.919	17	0.99317	1	0.684259	1.9337e-26
FDGILGMAYPR	CATD_HUMAN	P07339	K.FDGILGMAYPR.I	7.767	3	0.9938	1	1.09841	1.95313e-15
FDHILYTGSTGVGK	AL3A1_HUMAN	P30838	R.FDHILYTGSTGVGK.I	30.243	11	0.99355	1	1.15046	1.24512e-18
FDIAVDGEPLGR	PPIA_HUMAN	P62937	F.FDIAVDGEPLGR.V	43.03	9	0.9892	1	0.524445	5.73487e-14
FDLGQDVIDFTGHALALYR	GDIA_HUMAN	P31150	K.FDLGQDVIDFTGHALALYR.T	10.962	4	0.99266	1	1.36837	1.0209e-14
FDLGQDVIDFTGHALALYR	GDIB_HUMAN	P50395	K.FDLGQDVIDFTGHALALYR.T	19.101	7	0.99266	1	1.36837	1.0209e-14
FDLVPVPTNLYGDFFTGDAYVILK	GELS_HUMAN	P06396	K.FDLVPVPTNLYGDFFTGDAYVILK.T	20.077	11	0.99386	1	1.52202	1.06711e-25
FDRNPELQNLLLDDFFK	6PGD_HUMAN	P52209	A.FDRNPELQNLLLDDFFK.S	41.615	17	0.994	1	0.712883	4.40563e-16
FDVSSTSVFK	NIBL1_HUMAN	Q96TA1	R.FDVSSTSVFK.Q	12.824	6	0.99124	1	1.03913	5.85938e-14
FEDENFILK	PPIA_HUMAN	P62937	K.FEDENFILK.H	43.03	9	0.99305	1	0.870258	7.8125e-13
FEELNADLFR	HSP72_HUMAN	P54652	R.FEELNADLFR.G	17.84	11	0.99426	1	1.11639	3.90625e-14
FEELNADLFR	HSP7C_HUMAN	P11142	R.FEELNADLFR.G	39.783	24	0.99426	1	1.11639	3.90625e-14
FENAFLSHVVSQHQALLGTIR	ATPA_HUMAN	P25705	K.FENAFLSHVVSQHQALLGTIR.A	20.253	7	0.99248	1	1.51565	1.86633e-18
FEVGDIMLIR	PNPH_HUMAN	P00491	K.FEVGDIMLIR.D	14.879	4	0.9918	1	1.42015	1.58789e-13
FEVQVTVPK	A2MG_HUMAN	P01023	K.FEVQVTVPK.I	24.763	26	0.99359	1	0.550029	3.90625e-13
FFEHFIEGGR	OTUB1_HUMAN	Q96FW1	K.FFEHFIEGGR.T	10.701	2	0.99319	1	0.909915	1.61997e-12
FFESFGDLSTPDAVMGNPK	HBB_HUMAN	Q549N7	R.FFESFGDLSTPDAVMGNPK.V	80.952	12	0.99168	1	0.381061	1.17577e-23
FFGHGAEDSLADQAANEWGR	SAA_HUMAN	Q6FG67	R.FFGHGAEDSLADQAANEWGR.S	27.869	2	0.9938	1	1.55841	3.42513e-22
FFGTFLPEVAK	BPI_HUMAN	Q9H203	K.FFGTFLPEVAK.K	10.062	4	0.99286	1	1.15489	1.46484e-15
FFQSLDGIMFINK	ISK5_HUMAN	Q9NQ38	K.FFQSLDGIMFINK.C	4.229	4	0.99403	1	0.6056	1.95313e-17
FFVGGNWK	TPIS_HUMAN	P60174	K.FFVGGNWK.M	53.012	9	0.84537	1	0.706782	2.01172e-11
FGAQLAHIQALISGIEAQLGDVR	K1C19_HUMAN	Q9P1Y4	R.FGAQLAHIQALISGIEAQLGDVR.A	40	16	0.9891	1	1.02689	1.40762e-21
FGDPVVQSDMK	HSP71_HUMAN	P08107	K.FGDPVVQSDMK.H	43.058	20	0.99341	1	0.642698	1.51367e-15
FGDRFPAMSDAYDR	PNPH_HUMAN	P00491	R.FGDRFPAMSDAYDR.T	14.879	4	0.99313	1	1.10711	3.37994e-13
FGDSNTVMR	DESP_HUMAN	P15924	K.FGDSNTVMR.F	49.739	138	0.99323	1	0.889162	1.95313e-13
FGFPEGSVELYAEK	RS3_HUMAN	P23396	R.FGFPEGSVELYAEK.V	16.049	4	0.99205	1	0.711627	1.40839e-19
FGHLEVPSSMFR	PERL_HUMAN	P22079	R.FGHLEVPSSMFR.L	32.865	16	0.99325	1	0.809074	1.70898e-15
FGPGVAFR	K1C19_HUMAN	Q9P1Y4	R.FGPGVAFR.A	40	16	0.9939	1	0.92248	3.90625e-12
FGQGSGPIVLDDVR	DMBT1_HUMAN	Q9Y4V9	Q.FGQGSGPIVLDDVR.C	14.463	9	0.9941	1	-0.075133	4.88281e-18
FGVEQDVDMVFASFIR	KPYM_HUMAN	Q9BWB5	K.FGVEQDVDMVFASFIR.K	49.153	22	0.99141	1	1.24816	1.4666e-19
FGYGYGPY	STAT_HUMAN	P02808	R.FGYGYGPY.Q	48.387	9	0.98662	1	-0.556275	4.29688e-12
FGYGYGPYQPVPEQP	STAT_HUMAN	P02808	R.FGYGYGPYQPVPEQP.L	48.387	9	0.99335	1	0.304929	1.42448e-15
FGYGYGPYQPVPEQPL	STAT_HUMAN	P02808	R.FGYGYGPYQPVPEQPL.Y	48.387	9	0.99298	1	0.152801	1.68622e-17
FGYGYGPYQPVPEQPLYPQP	STAT_HUMAN	P02808	R.FGYGYGPYQPVPEQPLYPQP.Y	48.387	9	0.99106	1	0.502246	1.75355e-16
FGYGYGPYQPVPEQPLYPQPY	STAT_HUMAN	P02808	R.FGYGYGPYQPVPEQPLYPQPY.Q	48.387	9	0.99276	1	0.510909	1.12258e-14
FGYGYGPYQPVPEQPLYPQPYQPQ	STAT_HUMAN	P02808	R.FGYGYGPYQPVPEQPLYPQPYQPQ.Y	48.387	9	0.99073	1	-0.0158944	1.21392e-15
FGYGYGPYQPVPEQPLYPQPYQPQY	STAT_HUMAN	P02808	R.FGYGYGPYQPVPEQPLYPQPYQPQY.Q	48.387	9	0.99344	1	0.413224	6.64628e-18
FGYGYGPYQPVPEQPLYPQPYQPQYQQYT	STAT_HUMAN	P02808	R.FGYGYGPYQPVPEQPLYPQPYQPQYQQYT.F	48.387	9	0.99128	1	0.824606	1.41411e-20
FGYGYGPYQPVPEQPLYPQPYQPQYQQYTF	STAT_HUMAN	P02808	R.FGYGYGPYQPVPEQPLYPQPYQPQYQQYTF.-	48.387	9	0.99236	1	0.212426	6.00095e-19
FHDFLGDSWGILFSHPR	PRDX6_HUMAN	P30041	R.FHDFLGDSWGILFSHPR.D	41.071	6	0.99301	1	1.15514	6.32096e-22
FHEQPELQKK	CYTN_HUMAN	P01037	A.FHEQPELQKK.Q	62.411	13	0.95746	1	0.840436	1.72992e-11
FHEQPELQKK	CYTS_HUMAN	P01036	A.FHEQPELQKK.Q	60.993	15	0.95746	1	0.840436	1.72992e-11
FHEQPELQKK	CYTT_HUMAN	P09228	A.FHEQPELQKK.Q	41.135	8	0.95746	1	0.840436	1.72992e-11
FIENEEQEYVQTVK	ANXA1_HUMAN	P04083	W.FIENEEQEYVQTVK.S	67.052	42	0.99376	1	0.127305	4.88281e-18
FISDHSITR	DMBT1_HUMAN	Q9Y4V9	R.FISDHSITR.R	14.463	9	0.99301	1	1.0852	7.8125e-13
FISDHSITRR	DMBT1_HUMAN	Q9Y4V9	R.FISDHSITRR.G	14.463	9	0.64383	0.762457	1.61639	7.6073e-12
FISDKDASIVGFFDDSFSEAHSEFLK	PDIA3_HUMAN	P30101	K.FISDKDASIVGFFDDSFSEAHSEFLK.A	16.832	6	0.99343	1	0.620589	4.09225e-30
FITHAPPGEFNEVFNDVR	CAZA1_HUMAN	P52907	K.FITHAPPGEFNEVFNDVR.L	9.79	2	0.99353	1	0.882038	5.87783e-15
FKDLGEENFK	ALBU_HUMAN	Q9P157	R.FKDLGEENFK.A	41.544	47	0.99431	1	0.653395	3.90625e-14
FKEANNFLWPFK	RL7_HUMAN	P18124	R.FKEANNFLWPFK.L	14.919	3	0.99253	1	0.983512	5.75334e-12
FKIPGSPPESMGR	GDIB_HUMAN	P50395	R.FKIPGSPPESMGR.G	19.101	7	0.9854	1	0.776624	4.99784e-12
FKLEESYTLNSDLAR	ILEU_HUMAN	P30740	R.FKLEESYTLNSDLAR.L	59.367	17	0.99373	1	0.729511	1.2433e-17
FKVEESYDLKDTLR	SPB3_HUMAN	Q8IXI3	R.FKVEESYDLKDTLR.T	42.821	15	0.99365	1	0.642693	8.35765e-17
FKVEVVEPK	A2ML1_HUMAN	A8K2U0	K.FKVEVVEPK.E	27.854	29	0.99237	1	0.841552	1.17188e-12
FLASVSTVLTSK	HBA_HUMAN	P69905	K.FLASVSTVLTSK.Y	85.915	14	0.99369	1	0.531674	9.76563e-17
FLDQNLQK	DESP_HUMAN	P15924	K.FLDQNLQK.Y	49.739	138	0.98429	1	0.639105	9.60938e-11
FLEFQYLTGGLVDPEVHGR	DESP_HUMAN	P15924	R.FLEFQYLTGGLVDPEVHGR.I	49.739	138	0.99412	1	0.467259	5.42846e-23
FLENEDRR	A1AT_HUMAN	Q86U18	K.FLENEDRR.S	39.952	14	0.96551	1	0.80676	2.62568e-11
FLEQQNQVLQTK	K22E_HUMAN	P35908	R.FLEQQNQVLQTK.W	40.845	30	0.99145	1	-0.348052	1.6416e-15
FLEQQNQVLQTK	K2C1B_HUMAN	Q7Z794	V.FLEQQNQVLQTK.W	7.093	5	0.99145	1	-0.348052	1.6416e-15
FLEQQNQVLQTK	K2C1_HUMAN	P04264	R.FLEQQNQVLQTK.W	66.77	58	0.99145	1	-0.348052	1.6416e-15
FLGMFLYEYAR	ALBU_HUMAN	Q9P157	V.FLGMFLYEYAR.R	41.544	47	0.9903	1	1.34444	2.15332e-14
FLIPNASQAESK	1433Z_HUMAN	Q6NUR9	K.FLIPNASQAESK.V	53.878	14	0.99383	1	0.720731	1.95313e-16
FLIPNASQAESKV	1433Z_HUMAN	Q6NUR9	K.FLIPNASQAESKV.F	53.878	14	0.99061	1	0.32857	2.53347e-12
FLMANGQLVK	GDIA_HUMAN	P31150	K.FLMANGQLVK.M	10.962	4	0.99293	1	1.0584	9.52244e-12
FLMANGQLVK	GDIB_HUMAN	P50395	K.FLMANGQLVK.M	19.101	7	0.99293	1	1.0584	9.52244e-12
FLQHKDDNPNLPR	ALBU_HUMAN	Q9P157	C.FLQHKDDNPNLPR.L	41.544	47	0.99109	1	0.956488	8.87324e-16
FLSQPFQVAEVFTGHMGK	ATPB_HUMAN	P06576	R.FLSQPFQVAEVFTGHMGK.L	30.435	10	0.98919	1	1.42107	6.80678e-15
FLTLAEDILR	RAB10_HUMAN	P61026	A.FLTLAEDILR.K	17	4	0.99157	1	1.20504	3.90625e-12
FMETVAEK	CLUS_HUMAN	P10909	K.FMETVAEK.A	18.931	6	0.99308	1	1.3234	3.90625e-12
FMFDLFQQFR	SPB3_HUMAN	Q8IXI3	K.FMFDLFQQFR.K	42.821	15	0.99309	1	1.38823	7.8125e-14
FMFDLFQQFR	SPB4_HUMAN	P48594	K.FMFDLFQQFR.K	27.179	10	0.99309	1	1.38823	7.8125e-14
FMFDLFQQFRK	SPB3_HUMAN	Q8IXI3	K.FMFDLFQQFRK.S	42.821	15	0.99335	1	1.11041	1.60672e-14
FMFDLFQQFRK	SPB4_HUMAN	P48594	K.FMFDLFQQFRK.S	27.179	10	0.99335	1	1.11041	1.60672e-14
FNADEFEDMVAEKR	RL10_HUMAN	P27635	K.FNADEFEDMVAEKR.L	12.15	2	0.9926	1	1.09016	4.62444e-15
FNTANDDNVTQVR	CATA_HUMAN	P04040	R.FNTANDDNVTQVR.A	7.78	3	0.99166	1	0.561201	3.40225e-18
FNWYVDGVEV	IGHG1_HUMAN	P01857	K.FNWYVDGVEV.H	34.848	16	0.9902	1	0.8298	7.04874e-12
FNWYVDGVEV	IGHG2_HUMAN	P01859	Q.FNWYVDGVEV.H	30.982	12	0.9902	1	0.8298	7.04874e-12
FNWYVDGVEV	IGHG4_HUMAN	P01861	Q.FNWYVDGVEV.H	29.052	14	0.9902	1	0.8298	7.04874e-12
FNWYVDGVEVHNAK	IGHG1_HUMAN	P01857	K.FNWYVDGVEVHNAK.T	34.848	16	0.99412	1	0.638063	6.10352e-20
FNWYVDGVEVHNAK	IGHG2_HUMAN	P01859	Q.FNWYVDGVEVHNAK.T	30.982	12	0.99412	1	0.638063	6.10352e-20
FNWYVDGVEVHNAK	IGHG4_HUMAN	P01861	Q.FNWYVDGVEVHNAK.T	29.052	14	0.99412	1	0.638063	6.10352e-20
FPGQLNADLR	TBB1_HUMAN	Q9H4B7	R.FPGQLNADLR.K	6.43	4	0.98655	1	0.645457	6.16973e-12
FPGQLNADLR	TBB2A_HUMAN	Q13885	R.FPGQLNADLR.K	42.247	18	0.98655	1	0.645457	6.16973e-12
FPGQLNADLR	TBB3_HUMAN	Q13509	R.FPGQLNADLR.K	26.889	12	0.98655	1	0.645457	6.16973e-12
FPGQLNADLR	TBB5_HUMAN	P07437	R.FPGQLNADLR.K	40.09	16	0.98655	1	0.645457	6.16973e-12
FPGQLNADLR	TBB8B_HUMAN	A6NNZ2	R.FPGQLNADLR.K	9.685	5	0.98655	1	0.645457	6.16973e-12
FPGQLNADLR	TBB8_HUMAN	Q3ZCM7	R.FPGQLNADLR.K	13.063	6	0.98655	1	0.645457	6.16973e-12
FPGQLNADLR	YI016_HUMAN	A6NKZ8	R.FPGQLNADLR.K	11.559	5	0.98655	1	0.645457	6.16973e-12
FPGQLNADLRK	TBB1_HUMAN	Q9H4B7	R.FPGQLNADLRK.L	6.43	4	0.992	1	2.15364	5.24851e-13
FPGQLNADLRK	TBB2A_HUMAN	Q13885	R.FPGQLNADLRK.L	42.247	18	0.992	1	2.15364	5.24851e-13
FPGQLNADLRK	TBB3_HUMAN	Q13509	R.FPGQLNADLRK.L	26.889	12	0.992	1	2.15364	5.24851e-13
FPGQLNADLRK	TBB5_HUMAN	P07437	R.FPGQLNADLRK.L	40.09	16	0.992	1	2.15364	5.24851e-13
FPGQLNADLRK	TBB8B_HUMAN	A6NNZ2	R.FPGQLNADLRK.L	9.685	5	0.992	1	2.15364	5.24851e-13
FPGQLNADLRK	TBB8_HUMAN	Q3ZCM7	R.FPGQLNADLRK.L	13.063	6	0.992	1	2.15364	5.24851e-13
FPGQLNADLRK	YI016_HUMAN	A6NKZ8	R.FPGQLNADLRK.L	11.559	5	0.992	1	2.15364	5.24851e-13
FPSIVGRPR	ACTA_HUMAN	P62736	V.FPSIVGRPR.H	46.154	28	0.98783	1	0.2682	3.90625e-12
FPSIVGRPR	ACTBM_HUMAN	Q9BYX7	V.FPSIVGRPR.H	24	15	0.98783	1	0.2682	3.90625e-12
FPSIVGRPR	ACTB_HUMAN	Q96HG5	V.FPSIVGRPR.H	80.8	48	0.98783	1	0.2682	3.90625e-12
FPSIVGRPR	ACTC_HUMAN	P68032	V.FPSIVGRPR.H	48.806	32	0.98783	1	0.2682	3.90625e-12
FPSIVGRPR	ACTG_HUMAN	P63261	V.FPSIVGRPR.H	80.8	48	0.98783	1	0.2682	3.90625e-12
FPSIVGRPR	ACTH_HUMAN	P63267	V.FPSIVGRPR.H	46.277	28	0.98783	1	0.2682	3.90625e-12
FPSIVGRPR	ACTS_HUMAN	P68133	V.FPSIVGRPR.H	45.093	30	0.98783	1	0.2682	3.90625e-12
FPSIVGRPR	POTEE_HUMAN	Q6S8J3	V.FPSIVGRPR.Q	12.186	18	0.98783	1	0.2682	3.90625e-12
FPSIVGRPR	POTEF_HUMAN	A5A3E0	V.FPSIVGRPR.Q	10.512	17	0.98783	1	0.2682	3.90625e-12
FPSVSLQEASSFF	PROL4_HUMAN	Q16378	R.FPSVSLQEASSFF.R	19.403	5	0.99215	1	0.625949	8.49798e-15
FQDGDLTLYQSNTILR	GSTP1_HUMAN	P09211	K.FQDGDLTLYQSNTILR.H	65.714	12	0.99322	1	0.365173	1.05042e-20
FQELIFEDFAR	NIBL1_HUMAN	Q96TA1	R.FQELIFEDFAR.F	12.824	6	0.99314	1	0.761339	2.37769e-14
FQLFGSPSGQK	TRFL_HUMAN	Q8TCD2	K.FQLFGSPSGQK.D	34.085	34	0.9934	1	0.368993	3.90625e-15
FQLFGSPSGQKDLLFK	TRFL_HUMAN	Q8TCD2	K.FQLFGSPSGQKDLLFK.D	34.085	34	0.99249	1	1.1537	4.08481e-18
FQLFGSPSGQKDLLFKDSAIGFSR	TRFL_HUMAN	Q8TCD2	K.FQLFGSPSGQKDLLFKDSAIGFSR.V	34.085	34	0.99275	1	0.970101	2.39154e-19
FQMEDLVYNPEQVPR	A2ML1_HUMAN	A8K2U0	K.FQMEDLVYNPEQVPR.Y	27.854	29	0.99128	1	0.83589	1.81281e-18
FQNALLVR	ALBU_HUMAN	Q9P157	K.FQNALLVR.Y	41.544	47	0.99407	1	0.66041	3.125e-11
FQNSLKELQLQK	DESP_HUMAN	P15924	R.FQNSLKELQLQK.Q	49.739	138	0.99289	1	0.990769	3.75196e-15
FQSAAIGALQEASEAYLV	H33_HUMAN	P84243	R.FQSAAIGALQEASEAYLV.G	21.324	2	0.99097	1	0.550099	1.79176e-15
FQSLGVAFYR	RAB7A_HUMAN	P51149	R.FQSLGVAFYR.G	16.425	3	0.99315	1	1.23873	3.90625e-14
FQSLNADINKR	ILEU_HUMAN	P30740	R.FQSLNADINKR.G	59.367	17	0.99329	1	0.459192	1.71074e-14
FQVDNNNR	A2MG_HUMAN	P01023	K.FQVDNNNR.L	24.763	26	0.9811	1	0.559543	5.47852e-11
FRLPPGEYVVVPSTFEPNKEGDFVLR	CAN1_HUMAN	P07384	R.FRLPPGEYVVVPSTFEPNKEGDFVLR.F	16.807	9	0.99315	1	1.06413	3.31831e-19
FSAFIKNPVPAQDEALYQQLLR	CLIC3_HUMAN	O95833	K.FSAFIKNPVPAQDEALYQQLLR.A	23.305	3	0.99415	1	0.783599	1.41443e-18
FSALEVDETYVPK	ALBU_HUMAN	Q9P157	C.FSALEVDETYVPK.E	41.544	47	0.99316	1	0.368067	2.44141e-17
FSGSGSGTDFTLK	KV201_HUMAN	P01614	R.FSGSGSGTDFTLK.I	17.391	2	0.9941	1	0.78527	2.44141e-18
FSGSGSGTDFTLK	KV204_HUMAN	P01617	R.FSGSGSGTDFTLK.I	17.699	2	0.9941	1	0.78527	2.44141e-18
FSGSGSGTDFTLK	KV205_HUMAN	P06309	R.FSGSGSGTDFTLK.I	17.094	2	0.9941	1	0.78527	2.44141e-18
FSGSGSGTDFTLK	KV206_HUMAN	P06310	R.FSGSGSGTDFTLK.I	15.038	2	0.9941	1	0.78527	2.44141e-18
FSGSGSGTDFTLTI	KV104_HUMAN	P01596	R.FSGSGSGTDFTLTI.S	29.907	2	0.99225	1	0.508265	5.98528e-12
FSGSGSGTDFTLTI	KV108_HUMAN	P01600	R.FSGSGSGTDFTLTI.S	29.63	2	0.99225	1	0.508265	5.98528e-12
FSGSGSGTDFTLTI	KV109_HUMAN	P01601	R.FSGSGSGTDFTLTI.S	27.35	2	0.99225	1	0.508265	5.98528e-12
FSGSGSGTDFTLTI	KV117_HUMAN	P01609	R.FSGSGSGTDFTLTI.S	29.63	2	0.99225	1	0.508265	5.98528e-12
FSGSGSGTDFTLTI	KV123_HUMAN	P04431	R.FSGSGSGTDFTLTI.S	24.806	2	0.99225	1	0.508265	5.98528e-12
FSGSGSGTDFTLTI	KV302_HUMAN	P01620	R.FSGSGSGTDFTLTI.S	39.45	4	0.99225	1	0.508265	5.98528e-12
FSGSGSGTDFTLTI	KV304_HUMAN	P01622	R.FSGSGSGTDFTLTI.S	31.193	3	0.99225	1	0.508265	5.98528e-12
FSGSGSGTDFTLTI	KV305_HUMAN	P01623	R.FSGSGSGTDFTLTI.S	39.45	4	0.99225	1	0.508265	5.98528e-12
FSGSGSGTDFTLTI	KV307_HUMAN	P04206	R.FSGSGSGTDFTLTI.S	31.193	3	0.99225	1	0.508265	5.98528e-12
FSGSGSGTDFTLTI	KV309_HUMAN	P04433	R.FSGSGSGTDFTLTI.S	35.652	3	0.99225	1	0.508265	5.98528e-12
FSGSGSGTDFTLTI	KV310_HUMAN	P04434	R.FSGSGSGTDFTLTI.S	19.828	2	0.99225	1	0.508265	5.98528e-12
FSGSGSGTDFTLTI	KV312_HUMAN	P18135	R.FSGSGSGTDFTLTI.S	50.388	5	0.99225	1	0.508265	5.98528e-12
FSGSGSGTDFTLTI	KV313_HUMAN	P18136	R.FSGSGSGTDFTLTI.S	50.388	5	0.99225	1	0.508265	5.98528e-12
FSGSGSGTDFTLTI	KV401_HUMAN	P06312	R.FSGSGSGTDFTLTI.S	46.281	4	0.99225	1	0.508265	5.98528e-12
FSGSGSGTDFTLTI	KV402_HUMAN	P01625	R.FSGSGSGTDFTLTI.S	49.123	4	0.99225	1	0.508265	5.98528e-12
FSGSGSGTDFTLTI	KV403_HUMAN	P06313	R.FSGSGSGTDFTLTI.S	42.105	4	0.99225	1	0.508265	5.98528e-12
FSGSGSGTDFTLTI	KV404_HUMAN	P06314	R.FSGSGSGTDFTLTI.S	41.791	4	0.99225	1	0.508265	5.98528e-12
FSGSGSGTDFTLTISR	KV302_HUMAN	P01620	R.FSGSGSGTDFTLTISR.L	39.45	4	0.99052	1	-0.315177	6.10352e-22
FSGSGSGTDFTLTISR	KV304_HUMAN	P01622	R.FSGSGSGTDFTLTISR.L	31.193	3	0.99052	1	-0.315177	6.10352e-22
FSGSGSGTDFTLTISR	KV305_HUMAN	P01623	R.FSGSGSGTDFTLTISR.L	39.45	4	0.99052	1	-0.315177	6.10352e-22
FSGSGSGTDFTLTISR	KV307_HUMAN	P04206	R.FSGSGSGTDFTLTISR.L	31.193	3	0.99052	1	-0.315177	6.10352e-22
FSGSGSGTDFTLTISR	KV312_HUMAN	P18135	R.FSGSGSGTDFTLTISR.L	50.388	5	0.99052	1	-0.315177	6.10352e-22
FSGSGSGTDFTLTISR	KV313_HUMAN	P18136	R.FSGSGSGTDFTLTISR.L	50.388	5	0.99052	1	-0.315177	6.10352e-22
FSGWYDADLSPAGHEEAK	PGAM1_HUMAN	P18669	R.FSGWYDADLSPAGHEEAK.R	42.913	9	0.99354	1	0.980711	9.76165e-20
FSIEEALQSGR	PEPL_HUMAN	O60437	K.FSIEEALQSGR.L	32.517	52	0.99326	1	0.873978	3.90625e-15
FSLVGIGGQDLNEGNR	PLSL_HUMAN	P13796	K.FSLVGIGGQDLNEGNR.T	25.359	10	0.99308	1	0.0807842	1.23261e-20
FSLVPHNYGLVLYENK	NIBL1_HUMAN	Q96TA1	R.FSLVPHNYGLVLYENK.A	12.824	6	0.99239	1	1.60604	2.50682e-15
FSMPGFK	AHNK_HUMAN	Q09666	K.FSMPGFK.A	19.508	36	0.94976	1	0.764535	7.8125e-11
FSMPGFKAEGPEVDVNLPK	AHNK_HUMAN	Q09666	K.FSMPGFKAEGPEVDVNLPK.A	19.508	36	0.99268	1	1.17786	8.32686e-19
FSMPGFKGEGPDVDVNLPK	AHNK_HUMAN	Q09666	K.FSMPGFKGEGPDVDVNLPK.A	19.508	36	0.9929	1	1.28987	1.22943e-18
FSMPGFKGEGPEVDVNLPK	AHNK_HUMAN	Q09666	K.FSMPGFKGEGPEVDVNLPK.A	19.508	36	0.99008	1	1.00635	1.09862e-13
FSMPSLKGEGPEVDVNLPK	AHNK_HUMAN	Q09666	K.FSMPSLKGEGPEVDVNLPK.A	19.508	36	0.9915	1	1.37017	7.74429e-15
FSMVVQDGIVK	PRDX5_HUMAN	P30044	R.FSMVVQDGIVK.A	39.252	7	0.99405	1	0.614664	1.95313e-15
FSQSSQSSQR	K2C3_HUMAN	P12035	K.FSQSSQSSQR.Y	32.006	23	0.99263	1	1.64285	7.8125e-14
FSQTTSSSQHSSTK	K22O_HUMAN	Q01546	R.FSQTTSSSQHSSTK.-	46.082	34	0.99264	1	1.86262	2.44141e-19
FSSQELILR	TGM3_HUMAN	Q08188	K.FSSQELILR.R	58.297	45	0.99419	1	0.725725	3.125e-12
FSSYSQMENWSR	PKP1_HUMAN	Q13835	R.FSSYSQMENWSR.H	30.254	18	0.99269	1	0.822156	4.88281e-17
FSVNLDVK	CRYAB_HUMAN	P02511	R.FSVNLDVK.H	42.857	5	0.99332	1	0.459643	7.8125e-12
FSVSPVVR	EF2_HUMAN	P13639	K.FSVSPVVR.V	33.566	23	0.97967	1	1.21214	3.90625e-12
FTASAGIQVVGDDLTVTNPK	ENOA_HUMAN	Q6GMP2	K.FTASAGIQVVGDDLTVTNPK.R	64.977	24	0.9942	1	0.735613	2.80786e-21
FTDEEVDELYR	ML12A_HUMAN	P19105	R.FTDEEVDELYR.E	18.713	3	0.99199	1	0.194468	9.76563e-16
FTDTRKDEQER	EF2_HUMAN	P13639	R.FTDTRKDEQER.C	33.566	23	0.97239	1	0.538398	5.87497e-11
FTEVYAINR	PEPL_HUMAN	O60437	K.FTEVYAINR.Q	32.517	52	0.99321	1	0.838367	3.90625e-13
FTPGTFTNQIQAAFR	RSSA_HUMAN	Q86VC0	R.FTPGTFTNQIQAAFR.E	12.203	3	0.99231	1	0.578083	1.24089e-14
FTQAGSEVSALLGR	ATPB_HUMAN	P06576	R.FTQAGSEVSALLGR.I	30.435	10	0.98485	1	0.545323	9.38285e-12
FVADGIFKAELNEFLTR	RS3_HUMAN	P23396	K.FVADGIFKAELNEFLTR.E	16.049	4	0.98675	1	1.23162	6.50847e-17
FVFSLVDAMNGK	MDHM_HUMAN	P40926	R.FVFSLVDAMNGK.E	27.219	7	0.99341	1	1.13224	4.88281e-17
FVMQEEFSR	PDIA3_HUMAN	P30101	K.FVMQEEFSR.D	16.832	6	0.99371	1	0.769163	3.90625e-13
FVNSVINTLK	SPLC2_HUMAN	Q96DR5	K.FVNSVINTLK.S	49.799	15	0.994	1	0.624799	5.85938e-14
FVSISDLLVPK	GDIB_HUMAN	P50395	K.FVSISDLLVPK.D	19.101	7	0.99327	1	1.08079	3.90625e-15
FVSSGSGGGYGGGMR	K1C15_HUMAN	P19012	R.FVSSGSGGGYGGGMR.V	27.412	19	0.99339	1	0.933582	3.05176e-21
FVSTTSSSR	K2C5_HUMAN	P13647	K.FVSTTSSSR.K	65.932	71	0.99342	1	1.54234	1.95313e-13
FVSTTSSSRK	K2C5_HUMAN	P13647	K.FVSTTSSSRK.S	65.932	71	0.99224	1	1.23561	6.98242e-14
FVSTTYSGVTR	K2C1_HUMAN	P04264	K.FVSTTYSGVTR.-	66.77	58	0.99399	1	0.514052	4.88281e-16
FVYPLDFAR	ADT1_HUMAN	P12235	C.FVYPLDFAR.T	7.047	2	0.93912	1	1.37238	7.8125e-12
FVYPLDFAR	ADT2_HUMAN	P05141	C.FVYPLDFAR.T	14.43	4	0.93912	1	1.37238	7.8125e-12
FVYPLDFAR	ADT3_HUMAN	P12236	C.FVYPLDFAR.T	14.43	4	0.93912	1	1.37238	7.8125e-12
FWAPESAPLK	COF1_HUMAN	P23528	I.FWAPESAPLK.S	50	7	0.91808	1	0.615678	3.32031e-13
FWAPESAPLK	COF2_HUMAN	Q9Y281	I.FWAPESAPLK.S	18.675	4	0.91808	1	0.615678	3.32031e-13
FWWENPGVFTNEQK	PERL_HUMAN	P22079	R.FWWENPGVFTNEQK.D	32.865	16	0.99319	1	1.48314	1.2207e-19
FWWENPGVFTNEQKDSLQK	PERL_HUMAN	P22079	R.FWWENPGVFTNEQKDSLQK.M	32.865	16	0.99376	1	0.782061	1.43596e-19
FYAPELLFFAK	ALBU_HUMAN	Q9P157	Y.FYAPELLFFAK.R	41.544	47	0.99414	1	0.916256	1.95313e-14
FYGDEEKDKGLQTSQDAR	CALR_HUMAN	P27797	K.FYGDEEKDKGLQTSQDAR.F	16.067	4	0.99266	1	1.48119	9.713e-21
FYGDYGSNYLYDN	HIS1_HUMAN	P15515	P.FYGDYGSNYLYDN.-	28.07	7	0.99389	1	0.154501	1.55837e-14
FYHPEKEDGKLNK	CO3_HUMAN	P01024	R.FYHPEKEDGKLNK.L	20.204	22	0.99241	1	1.36052	2.78127e-14
FYPEDVAEELIQDITQK	EZRI_HUMAN	P15311	K.FYPEDVAEELIQDITQK.L	26.28	13	0.99095	1	1.89161	1.24408e-20
FYTIEILK	PIP_HUMAN	P12273	R.FYTIEILK.V	52.74	9	0.99401	1	0.964918	3.125e-11
FYTIEILKVE	PIP_HUMAN	P12273	R.FYTIEILKVE.-	52.74	9	0.99406	1	0.668745	1.5625e-13
FYYEILNSPEK	1433B_HUMAN	P31946	V.FYYEILNSPEK.A	36.179	8	0.99253	1	0.345085	1.95313e-14
FYYEILNSPEK	1433Z_HUMAN	Q6NUR9	V.FYYEILNSPEK.A	53.878	14	0.99253	1	0.345085	1.95313e-14
GADFLVTEVENGGSLGSK	KPYM_HUMAN	Q9BWB5	K.GADFLVTEVENGGSLGSK.K	49.153	22	0.99178	1	0.598864	1.89918e-20
GADVWFK	S10A8_HUMAN	P05109	K.GADVWFK.E	88.172	8	0.99343	1	0.944233	8.20313e-11
GADVWFKELDINTDGAVNFQEFLILVIKMGVAAHKKSHEESHKE	S10A8_HUMAN	P05109	K.GADVWFKELDINTDGAVNFQEFLILVIKMGVAAHKKSHEESHKE.-	88.172	8	0.99397	1	0.818009	2.06437e-18
GAFGKPQGTVAR	RL10_HUMAN	P27635	R.GAFGKPQGTVAR.V	12.15	2	0.99215	1	0.77094	5.22976e-11
GAFSSVSMSGGAGR	K2C4_HUMAN	P19013	R.GAFSSVSMSGGAGR.C	74.532	75	0.99383	1	0.617607	1.61878e-16
GAGAFGYFEVTHDITK	CATA_HUMAN	P04040	K.GAGAFGYFEVTHDITK.Y	7.78	3	0.98843	1	1.46815	2.41832e-13
GAGHHHTLDSCRG	DSC2_HUMAN	Q02487	R.GAGHHHTLDSCRG.G	10.544	6	0.99211	1	1.88929	3.59378e-13
GAGSIAGASASPK	DESP_HUMAN	P15924	R.GAGSIAGASASPK.E	49.739	138	0.99317	1	0.783832	2.44141e-18
GAGTNEDALIEILTTR	ANXA3_HUMAN	P12429	K.GAGTNEDALIEILTTR.T	31.579	8	0.99404	1	1.07223	1.16535e-15
GALQNIIPASTGAAK	G3P_HUMAN	P04406	R.GALQNIIPASTGAAK.A	65.97	33	0.99151	1	0.0119083	2.50244e-18
GATQQILDEAER	TCPB_HUMAN	P78371	R.GATQQILDEAER.S	7.103	3	0.98912	1	1.12082	7.35276e-13
GAYPLSIEPIGVR	CERU_HUMAN	P00450	K.GAYPLSIEPIGVR.F	9.108	5	0.99393	1	0.98194	8.62793e-15
GDGVTHTVPIYEGYALPHAILR	ACTB_HUMAN	Q96HG5	S.GDGVTHTVPIYEGYALPHAILR.L	80.8	48	0.99368	1	0.809339	1.11081e-15
GDGVTHTVPIYEGYALPHAILR	ACTG_HUMAN	P63261	S.GDGVTHTVPIYEGYALPHAILR.L	80.8	48	0.99368	1	0.809339	1.11081e-15
GDLGIEIPAEK	KPYM_HUMAN	Q9BWB5	R.GDLGIEIPAEK.V	49.153	22	0.99362	1	0.964227	2.31494e-13
GDLGIEIPAEK	KPYR_HUMAN	P30613	R.GDLGIEIPAEK.V	2.091	2	0.99362	1	0.964227	2.31494e-13
GDLGIEIPAEKV	KPYM_HUMAN	Q9BWB5	R.GDLGIEIPAEKV.F	49.153	22	0.99243	1	1.09392	5.16081e-12
GDLGIEIPAEKV	KPYR_HUMAN	P30613	R.GDLGIEIPAEKV.F	2.091	2	0.99243	1	1.09392	5.16081e-12
GDQLILNLNNISSDR	LPLC1_HUMAN	Q9H4V6	K.GDQLILNLNNISSDR.I	45.041	20	0.99335	1	0.329531	7.8125e-19
GDRSEDFGVNEDLADSDAR	ANXA1_HUMAN	P04083	K.GDRSEDFGVNEDLADSDAR.A	67.052	42	0.99306	1	0.519528	4.80541e-17
GDTIQLYLGAK	LPLC1_HUMAN	Q9H4V6	K.GDTIQLYLGAK.L	45.041	20	0.99328	1	0.551275	7.8125e-15
GDYGSNYLYDN	HIS1_HUMAN	P15515	Y.GDYGSNYLYDN.-	28.07	7	0.99335	1	1.04814	1.05227e-13
GDYPLEAVR	KPYM_HUMAN	Q9BWB5	K.GDYPLEAVR.M	49.153	22	0.98769	1	0.836714	1.5625e-12
GEADAMSLDGGYVYTAGK	TRFL_HUMAN	Q8TCD2	K.GEADAMSLDGGYVYTAGK.C	34.085	34	0.99016	1	-0.346158	4.8729e-22
GEGQLGPAER	EF2_HUMAN	P13639	K.GEGQLGPAER.A	33.566	23	0.9935	1	0.566917	2.22266e-12
GELALKDAQAK	K2C78_HUMAN	Q8N1N4	R.GELALKDAQAK.V	44.038	31	0.99168	1	0.99341	2.83223e-13
GELALKDAQAKVDELEAALR	K2C78_HUMAN	Q8N1N4	R.GELALKDAQAKVDELEAALR.M	44.038	31	0.99207	1	1.35236	3.81967e-23
GELALKDAR	K2C5_HUMAN	P13647	R.GELALKDAR.N	65.932	71	0.99122	1	0.854931	5.89844e-11
GELALKDAR	K2C75_HUMAN	O95678	R.GELALKDAR.A	20.145	22	0.99122	1	0.854931	5.89844e-11
GELALKDAR	K2C7_HUMAN	P08729	R.GELALKDAR.A	10.235	7	0.99122	1	0.854931	5.89844e-11
GEMALKDAK	K2C6A_HUMAN	P02538	R.GEMALKDAK.N	70.035	77	0.99356	1	0.83277	2.01807e-12
GEMALKDAK	K2C6B_HUMAN	P04259	R.GEMALKDAK.N	68.44	73	0.99356	1	0.83277	2.01807e-12
GEMALKDAK	K2C6C_HUMAN	P48668	R.GEMALKDAK.N	67.553	75	0.99356	1	0.83277	2.01807e-12
GENALKDAHSK	K2C4_HUMAN	P19013	R.GENALKDAHSK.R	74.532	75	0.99266	1	2.01312	5.87573e-14
GENALKDAHSKR	K2C4_HUMAN	P19013	R.GENALKDAHSKR.V	74.532	75	0.99416	1	1.96847	4.39453e-15
GENALKDAHSKRVELEAALQQAKEELAR	K2C4_HUMAN	P19013	R.GENALKDAHSKRVELEAALQQAKEELAR.M	74.532	75	0.99323	1	1.04142	3.62462e-22
GENALKDAK	K2C1_HUMAN	P04264	R.GENALKDAK.N	66.77	58	0.99208	1	1.5655	2.4627e-11
GFDEYMKELGVGIALRK	FABP5_HUMAN	Q01469	K.GFDEYMKELGVGIALRK.M	20.741	4	0.99287	1	1.13527	6.22226e-18
GFDNFEQLLSGAHWMDQHFR	G6PI_HUMAN	P06744	V.GFDNFEQLLSGAHWMDQHFR.T	38.351	14	0.99418	1	0.869811	8.12084e-17
GFFDPNTEENLTYLQLK	DESP_HUMAN	P15924	K.GFFDPNTEENLTYLQLK.E	49.739	138	0.99371	1	0.691623	2.1286e-20
GFGFVTFDDHDPVDKIVLQK	ROA2_HUMAN	P22626	R.GFGFVTFDDHDPVDKIVLQK.Y	9.348	2	0.99211	1	1.18156	2.15591e-12
GFGFVTYATVEEVDAAMNARPHK	ROA1_HUMAN	P09651	R.GFGFVTYATVEEVDAAMNARPHK.V	10.484	2	0.9931	1	1.37119	1.66281e-20
GFGGVQVSPPNENV	AMY1_HUMAN	P04745	K.GFGGVQVSPPNENV.A	65.362	60	0.99323	1	0.30007	1.214e-16
GFGGVQVSPPNENV	AMY2B_HUMAN	P19961	K.GFGGVQVSPPNENV.A	53.816	42	0.99323	1	0.30007	1.214e-16
GFGGVQVSPPNENV	AMYP_HUMAN	P04746	K.GFGGVQVSPPNENV.A	45.597	37	0.99323	1	0.30007	1.214e-16
GFGGVQVSPPNENVAIHNPFRPWWER	AMY1_HUMAN	P04745	K.GFGGVQVSPPNENVAIHNPFRPWWER.Y	65.362	60	0.99275	1	0.0981109	6.02679e-19
GFGGVQVSPPNENVAIHNPFRPWWER	AMY2B_HUMAN	P19961	K.GFGGVQVSPPNENVAIHNPFRPWWER.Y	53.816	42	0.99275	1	0.0981109	6.02679e-19
GFGLSPTVGLTAFKPFFVDLTLPYSVVR	A2ML1_HUMAN	A8K2U0	R.GFGLSPTVGLTAFKPFFVDLTLPYSVVR.G	27.854	29	0.99428	1	1.25147	3.08268e-23
GFIVFNNDDWTF	AMY1_HUMAN	P04745	R.GFIVFNNDDWTF.S	65.362	60	0.95517	1	1.11213	4.07459e-15
GFIVFNNDDWTF	AMY2B_HUMAN	P19961	R.GFIVFNNDDWTF.S	53.816	42	0.95517	1	1.11213	4.07459e-15
GFKDQIYDIFQK	IF4A1_HUMAN	P60842	R.GFKDQIYDIFQK.L	21.429	7	0.99337	1	1.1145	3.94531e-15
GFMLAHPYGFTR	AMY1_HUMAN	P04745	V.GFMLAHPYGFTR.V	65.362	60	0.99119	1	0.797965	4.88281e-16
GFMLAHPYGFTR	AMY2B_HUMAN	P19961	V.GFMLAHPYGFTR.V	53.816	42	0.99119	1	0.797965	4.88281e-16
GFMLAHPYGFTR	AMYP_HUMAN	P04746	V.GFMLAHPYGFTR.V	45.597	37	0.99119	1	0.797965	4.88281e-16
GFPFVPPSR	CD040_HUMAN	Q6MZM9	R.GFPFVPPSR.F	32.42	3	0.98933	1	0.995981	3.90625e-13
GFQALGDAADIR	TIMP1_HUMAN	P01033	K.GFQALGDAADIR.F	12.56	2	0.99334	1	0.270888	3.90625e-16
GFSPKDVLVR	IGHA1_HUMAN	P01876	R.GFSPKDVLVR.W	44.476	16	0.99241	1	1.13789	3.90625e-14
GFSPKDVLVR	IGHA2_HUMAN	P01877	R.GFSPKDVLVR.W	36.176	13	0.99241	1	1.13789	3.90625e-14
GFSSGSAVVSGGSR	K22E_HUMAN	P35908	R.GFSSGSAVVSGGSR.R	40.845	30	0.99266	1	1.07985	1.2207e-19
GFYPSDIAVEWESNGQPENNYK	IGHG1_HUMAN	P01857	K.GFYPSDIAVEWESNGQPENNYK.T	34.848	16	0.99362	1	1.08375	1.15218e-20
GFYPSDIAVEWESNGQPENNYK	IGHG4_HUMAN	P01861	K.GFYPSDIAVEWESNGQPENNYK.T	29.052	14	0.99362	1	1.08375	1.15218e-20
GGDSEQFIDEER	PRPC_HUMAN	P02810	D.GGDSEQFIDEER.Q	51.807	18	0.99269	1	0.763085	2.05078e-14
GGGFGGGSSFGGGSGFSGGGFGGGGFGGGR	K22E_HUMAN	P35908	R.GGGFGGGSSFGGGSGFSGGGFGGGGFGGGR.F	40.845	30	0.99296	1	0.310299	1.33453e-30
GGGGGGYGSGGSSYGSGGGSYGSGGGGGGGR	K2C1_HUMAN	P04264	R.GGGGGGYGSGGSSYGSGGGSYGSGGGGGGGR.G	66.77	58	0.99287	1	0.490318	7.04709e-28
GGGGGIGGGFGGGSSGFSGGSGFGSISGAR	K2C3_HUMAN	P12035	R.GGGGGIGGGFGGGSSGFSGGSGFGSISGAR.Y	32.006	23	0.9933	1	0.261389	2.95172e-31
GGGGGSFGAGGGFGSR	K2C1_HUMAN	P04264	C.GGGGGSFGAGGGFGSR.S	66.77	58	0.99343	1	0.11546	1.52588e-21
GGPGSAVSPYPTFNPSSDVAALHK	ANXA1_HUMAN	P04083	K.GGPGSAVSPYPTFNPSSDVAALHK.A	67.052	42	0.99339	1	-0.210475	1.13737e-19
GGRPHRPPQGQPPQ	PRB3_HUMAN	Q04118	Q.GGRPHRPPQGQPPQ.-	17.476	9	0.98951	1	0.140604	1.04716e-14
GGRPQGPPQGQSPQ	PRPC_HUMAN	P02810	Q.GGRPQGPPQGQSPQ.-	51.807	18	0.98529	1	-0.449386	6.05416e-15
GGSFQLNELQGLK	TRFL_HUMAN	Q8TCD2	K.GGSFQLNELQGLK.S	34.085	34	0.99369	1	0.380723	1.44094e-13
GGVEDEVTLSAYITIALLEIPLTVTHPVVR	A2MG_HUMAN	P01023	K.GGVEDEVTLSAYITIALLEIPLTVTHPVVR.N	24.763	26	0.99333	1	0.802805	1.27188e-20
GGVNYFFDVEVGR	CYTN_HUMAN	P01037	V.GGVNYFFDVEVGR.T	62.411	13	0.99412	1	0.596696	2.0752e-17
GGVNYFFDVEVGR	CYTS_HUMAN	P01036	F.GGVNYFFDVEVGR.T	60.993	15	0.99412	1	0.596696	2.0752e-17
GGYFDEFGIIR	G6PD_HUMAN	P11413	R.GGYFDEFGIIR.D	10.097	4	0.99335	1	0.749953	1.9026e-12
GHGAGGASILT	AMY1_HUMAN	P04745	R.GHGAGGASILT.F	65.362	60	0.98947	1	0.531998	2.48286e-11
GHGAGGASILT	AMY2B_HUMAN	P19961	R.GHGAGGASILT.F	53.816	42	0.98947	1	0.531998	2.48286e-11
GHGAGGASILT	AMYP_HUMAN	P04746	R.GHGAGGASILT.F	45.597	37	0.98947	1	0.531998	2.48286e-11
GHGAGGASILTF	AMY1_HUMAN	P04745	R.GHGAGGASILTF.W	65.362	60	0.98058	1	1.26005	1.95313e-16
GHGAGGASILTF	AMY2B_HUMAN	P19961	R.GHGAGGASILTF.W	53.816	42	0.98058	1	1.26005	1.95313e-16
GHGAGGASILTF	AMYP_HUMAN	P04746	R.GHGAGGASILTF.W	45.597	37	0.98058	1	1.26005	1.95313e-16
GHGAGGASILTFWDA	AMY1_HUMAN	P04745	R.GHGAGGASILTFWDA.R	65.362	60	0.99418	1	0.438545	2.20135e-13
GHGAGGASILTFWDA	AMY2B_HUMAN	P19961	R.GHGAGGASILTFWDA.R	53.816	42	0.99418	1	0.438545	2.20135e-13
GHGAGGASILTFWDA	AMYP_HUMAN	P04746	R.GHGAGGASILTFWDA.R	45.597	37	0.99418	1	0.438545	2.20135e-13
GHGAGGASILTFWDAR	AMY1_HUMAN	P04745	R.GHGAGGASILTFWDAR.L	65.362	60	0.98963	1	0.937459	6.10352e-22
GHGAGGASILTFWDAR	AMY2B_HUMAN	P19961	R.GHGAGGASILTFWDAR.L	53.816	42	0.98963	1	0.937459	6.10352e-22
GHGAGGASILTFWDAR	AMYP_HUMAN	P04746	R.GHGAGGASILTFWDAR.L	45.597	37	0.98963	1	0.937459	6.10352e-22
GHHEAEIKPLAQSHATK	MYG_HUMAN	P02144	K.GHHEAEIKPLAQSHATK.H	24.026	6	0.99271	1	0.422622	8.57858e-22
GHLENNPALEK	RLA0L_HUMAN	Q8NHW5	R.GHLENNPALEK.L	17.35	5	0.99289	1	1.14442	1.95313e-15
GHLENNPALEK	RLA0_HUMAN	P05388	R.GHLENNPALEK.L	17.35	5	0.99289	1	1.14442	1.95313e-15
GHNGWVTQIATTPQFPDMILSASR	GBLP_HUMAN	P63244	K.GHNGWVTQIATTPQFPDMILSASR.D	18.927	4	0.99301	1	0.864373	2.16984e-15
GHVFEESQVAGTPMFVVK	EF2_HUMAN	P13639	R.GHVFEESQVAGTPMFVVK.A	33.566	23	0.99252	1	1.04234	2.49031e-15
GHYTEGAELVDSVLDVVR	TBB2A_HUMAN	Q13885	K.GHYTEGAELVDSVLDVVR.K	42.247	18	0.99332	1	0.842912	9.77548e-24
GHYTEGAELVDSVLDVVR	TBB3_HUMAN	Q13509	K.GHYTEGAELVDSVLDVVR.K	26.889	12	0.99332	1	0.842912	9.77548e-24
GHYTEGAELVDSVLDVVR	TBB5_HUMAN	P07437	K.GHYTEGAELVDSVLDVVR.K	40.09	16	0.99332	1	0.842912	9.77548e-24
GHYTEGAELVDSVLDVVRK	TBB2A_HUMAN	Q13885	K.GHYTEGAELVDSVLDVVRK.E	42.247	18	0.99342	1	0.865264	4.06151e-24
GHYTEGAELVDSVLDVVRK	TBB3_HUMAN	Q13509	K.GHYTEGAELVDSVLDVVRK.E	26.889	12	0.99342	1	0.865264	4.06151e-24
GHYTEGAELVDSVLDVVRK	TBB5_HUMAN	P07437	K.GHYTEGAELVDSVLDVVRK.E	40.09	16	0.99342	1	0.865264	4.06151e-24
GIFPPPPPQP	SMR3B_HUMAN	P02814	P.GIFPPPPPQP.-	67.089	19	0.99344	1	0.595662	3.90625e-14
GIGTDEFTLNR	ANXA3_HUMAN	P12429	K.GIGTDEFTLNR.I	31.579	8	0.9935	1	0.898167	2.05078e-15
GIGTNEQAIIDVLTK	ANXA8_HUMAN	P13928	K.GIGTNEQAIIDVLTK.R	11.621	4	0.99321	1	0.733167	1.46484e-19
GIGTNEQAIIDVLTK	AXA81_HUMAN	Q5T2P8	K.GIGTNEQAIIDVLTK.R	11.621	4	0.99321	1	0.733167	1.46484e-19
GIGTNEQAIIDVLTK	AXA82_HUMAN	Q5VT79	K.GIGTNEQAIIDVLTK.R	11.621	4	0.99321	1	0.733167	1.46484e-19
GIGTNEQAIIDVLTKR	ANXA8_HUMAN	P13928	K.GIGTNEQAIIDVLTKR.S	11.621	4	0.95211	1	1.07744	1.28032e-13
GIGTNEQAIIDVLTKR	AXA81_HUMAN	Q5T2P8	K.GIGTNEQAIIDVLTKR.S	11.621	4	0.95211	1	1.07744	1.28032e-13
GIGTNEQAIIDVLTKR	AXA82_HUMAN	Q5VT79	K.GIGTNEQAIIDVLTKR.S	11.621	4	0.95211	1	1.07744	1.28032e-13
GIHETTFNSIMK	ACTBL_HUMAN	Q562R1	S.GIHETTFNSIMK.C	28.457	15	0.99285	1	1.3258	1.46484e-15
GIHETTFNSIMK	ACTB_HUMAN	Q96HG5	C.GIHETTFNSIMK.C	80.8	48	0.99285	1	1.3258	1.46484e-15
GIHETTFNSIMK	ACTG_HUMAN	P63261	C.GIHETTFNSIMK.C	80.8	48	0.99285	1	1.3258	1.46484e-15
GIHETTFNSIMK	POTEE_HUMAN	Q6S8J3	C.GIHETTFNSIMK.S	12.186	18	0.99285	1	1.3258	1.46484e-15
GIHETTFNSIMK	POTEF_HUMAN	A5A3E0	C.GIHETTFNSIMK.S	10.512	17	0.99285	1	1.3258	1.46484e-15
GIHNSIGDYR	DESP_HUMAN	P15924	R.GIHNSIGDYR.W	49.739	138	0.99302	1	1.1115	3.90625e-14
GILAADESTGSIAK	ALDOA_HUMAN	P04075	K.GILAADESTGSIAK.R	34.341	13	0.99425	1	0.096719	2.92969e-18
GILAADESTGSIAKR	ALDOA_HUMAN	P04075	K.GILAADESTGSIAKR.L	34.341	13	0.99324	1	0.778266	6.96187e-16
GILFVGSGVSGGEEGAR	6PGD_HUMAN	P52209	K.GILFVGSGVSGGEEGAR.Y	41.615	17	0.99402	1	0.953923	4.21906e-22
GILGYTEHQVV	G3P_HUMAN	P04406	K.GILGYTEHQVV.S	65.97	33	0.99029	1	0.403498	2.31798e-12
GILLYGPPGTGK	TERA_HUMAN	P55072	R.GILLYGPPGTGK.T	12.655	8	0.99307	0.5341	0.949081	7.77344e-13
GISQEQMQEFR	ACTN4_HUMAN	O43707	K.GISQEQMQEFR.A	42.371	27	0.99352	1	0.735414	5.31885e-14
GIVDQSQQAYQEAFEISK	1433Z_HUMAN	Q6NUR9	K.GIVDQSQQAYQEAFEISK.K	53.878	14	0.99325	1	0.521084	3.66211e-23
GIVDQSQQAYQEAFEISKK	1433Z_HUMAN	Q6NUR9	K.GIVDQSQQAYQEAFEISKK.E	53.878	14	0.99413	1	0.371113	2.45788e-23
GIVDSITGQR	DESP_HUMAN	P15924	R.GIVDSITGQR.L	49.739	138	0.99328	1	1.08438	7.8125e-14
GIVMDSGDGVTHTVPIYEGYALPHAILR	ACTB_HUMAN	Q96HG5	T.GIVMDSGDGVTHTVPIYEGYALPHAILR.L	80.8	48	0.99411	1	0.853377	9.09764e-25
GIVMDSGDGVTHTVPIYEGYALPHAILR	ACTG_HUMAN	P63261	T.GIVMDSGDGVTHTVPIYEGYALPHAILR.L	80.8	48	0.99411	1	0.853377	9.09764e-25
GIYAYGFEKPSAIQQR	IF4A1_HUMAN	P60842	R.GIYAYGFEKPSAIQQR.A	21.429	7	0.99362	1	0.946615	3.72229e-19
GIYAYGFEKPSAIQQR	IF4A2_HUMAN	Q14240	R.GIYAYGFEKPSAIQQR.A	13.022	4	0.99362	1	0.946615	3.72229e-19
GIYGQYQLLGIK	ZG16B_HUMAN	Q96DA0	V.GIYGQYQLLGIK.S	57.212	15	0.99267	1	1.55021	2.12378e-14
GKLEEQRPER	TCTP_HUMAN	P13693	K.GKLEEQRPER.V	13.953	2	0.98726	1	0.546326	8.08597e-12
GKMYGPGGGK	ZG16B_HUMAN	Q96DA0	A.GKMYGPGGGK.Y	57.212	15	0.99143	1	1.48801	4.49707e-12
GLDLPALNMQR	PERM_HUMAN	P05164	I.GLDLPALNMQR.S	29.396	23	0.99386	1	0.785313	2.38281e-13
GLDYASQQGTAALQK	BPI_HUMAN	Q9H203	K.GLDYASQQGTAALQK.E	10.062	4	0.99309	1	0.114339	9.83155e-18
GLEWLWSPQIVGLYNR	PKP3_HUMAN	Q9Y446	K.GLEWLWSPQIVGLYNR.L	6.148	3	0.99199	1	1.78952	7.36943e-18
GLEWVANIK	HV320_HUMAN	P01781	K.GLEWVANIK.Z	17.241	2	0.99399	1	1.04456	7.8125e-13
GLFIIDDKGILR	PRDX1_HUMAN	Q06830	R.GLFIIDDKGILR.Q	48.744	12	0.99207	1	1.01369	1.5625e-15
GLFIIDGK	PRDX2_HUMAN	P32119	R.GLFIIDGK.G	25.253	5	0.79535	1	0.967619	5.85938e-11
GLGSNERLEFIVSTGPYPSESAMTK	TGM3_HUMAN	Q08188	K.GLGSNERLEFIVSTGPYPSESAMTK.A	58.297	45	0.99202	1	0.0410969	1.16822e-20
GLGTDEDTLIEILASR	ANXA1_HUMAN	P04083	K.GLGTDEDTLIEILASR.T	67.052	42	0.99242	1	0.177686	7.32422e-21
GLGTDEESILTLLTSR	ANXA5_HUMAN	P08758	K.GLGTDEESILTLLTSR.S	17.188	4	0.99226	1	1.48607	4.46668e-16
GLGVGFGSGGGSSSSV	K2C5_HUMAN	P13647	R.GLGVGFGSGGGSSSSV.K	65.932	71	0.9926	1	1.09895	1.43433e-20
GLGVGFGSGGGSSSSVK	K2C5_HUMAN	P13647	R.GLGVGFGSGGGSSSSVK.F	65.932	71	0.99338	1	0.408631	1.52588e-23
GLIDEVNQDFTNR	FIBA_HUMAN	P02671	K.GLIDEVNQDFTNR.I	2.425	2	0.99277	1	1.07723	1.45233e-17
GLIDYETFK	DESP_HUMAN	P15924	K.GLIDYETFK.E	49.739	138	0.9931	1	0.898719	3.41016e-12
GLIENTSTQR	EVPL_HUMAN	Q92817	R.GLIENTSTQR.L	19.97	31	0.97601	1	1.36179	2.11914e-13
GLKEGIPALDNFLDKL	EF2_HUMAN	P13639	K.GLKEGIPALDNFLDKL.-	33.566	23	0.99021	1	1.56335	9.95779e-11
GLMESISAGSFSVPGGHK	GBP6_HUMAN	Q6ZN66	K.GLMESISAGSFSVPGGHK.L	35.387	19	0.99414	1	0.924905	8.66291e-20
GLMSSGMSQLIGLK	PKP1_HUMAN	Q13835	K.GLMSSGMSQLIGLK.E	30.254	18	0.99142	1	0.825344	5.9082e-18
GLPAPIEK	IGHG2_HUMAN	P01859	K.GLPAPIEK.T	30.982	12	0.99253	0.818135	1.12328	1.5625e-11
GLPSPYNMSSAPGSR	DESP_HUMAN	P15924	K.GLPSPYNMSSAPGSR.S	49.739	138	0.99374	1	0.331971	3.86536e-18
GLSQQLFDSALLLLQK	BPIL1_HUMAN	Q8N4F0	V.GLSQQLFDSALLLLQK.A	41.266	14	0.994	1	1.32504	1.9877e-16
GLSTESILIPR	LC1L1_HUMAN	Q5VSP4	R.GLSTESILIPR.Q	29.012	5	0.99316	1	0.548757	7.8125e-15
GLSTESILIPR	LCN1_HUMAN	P31025	R.GLSTESILIPR.Q	76.136	13	0.99316	1	0.548757	7.8125e-15
GLVGEIIKR	NDKA_HUMAN	P15531	R.GLVGEIIKR.F	25	3	0.99125	1	1.49083	3.79297e-12
GLVGEIIKR	NDKB_HUMAN	P22392	R.GLVGEIIKR.F	41.447	5	0.99125	1	1.49083	3.79297e-12
GLVGIEFK	DESP_HUMAN	P15924	R.GLVGIEFK.E	49.739	138	0.99206	1	1.06048	1.5625e-11
GLVLSGVLHK	SPB3_HUMAN	Q8IXI3	R.GLVLSGVLHK.A	42.821	15	0.99369	1	1.07779	7.8125e-14
GMLKDNAMLEYLK	EZRI_HUMAN	P15311	R.GMLKDNAMLEYLK.I	26.28	13	0.99247	1	0.661019	3.07617e-17
GMLREDAVLEYLK	MOES_HUMAN	P26038	R.GMLREDAVLEYLK.I	15.598	8	0.99299	1	0.962494	6.03234e-14
GMQDLVEDFK	K2C6A_HUMAN	P02538	R.GMQDLVEDFK.N	70.035	77	0.99375	1	0.770662	4.00391e-14
GMQDLVEDFKNK	K2C6A_HUMAN	P02538	R.GMQDLVEDFKNK.Y	70.035	77	0.994	1	0.6887	1.95313e-16
GMQDLVEDFKNKYEDEINKR	K2C6A_HUMAN	P02538	R.GMQDLVEDFKNKYEDEINKR.T	70.035	77	0.99373	1	0.5768	4.18318e-21
GNDVAFHFNPR	LEG3_HUMAN	P17931	R.GNDVAFHFNPR.F	19.6	4	0.99254	1	2.15637	3.90625e-14
GNFHAVYRDDLK	S10A8_HUMAN	P05109	K.GNFHAVYRDDLK.K	88.172	8	0.99412	1	0.519912	5.34545e-14
GNFHAVYRDDLKK	S10A8_HUMAN	P05109	K.GNFHAVYRDDLKK.L	88.172	8	0.99338	1	1.32405	4.2493e-15
GNFNYIEFTR	ML12A_HUMAN	P19105	K.GNFNYIEFTR.I	18.713	3	0.99337	1	0.680934	3.90625e-14
GNPTVEVDLFTSK	ENOA_HUMAN	Q6GMP2	R.GNPTVEVDLFTSK.G	64.977	24	0.99321	1	0.41367	2.44141e-18
GNTAAQLSK	ILEU_HUMAN	P30740	R.GNTAAQLSK.T	59.367	17	0.99408	1	0.47295	8.98438e-13
GNVGFVFTK	RLA0L_HUMAN	Q8NHW5	W.GNVGFVFTK.E	17.35	5	0.97516	1	0.647847	5.85938e-12
GNVGFVFTK	RLA0_HUMAN	P05388	R.GNVGFVFTK.E	17.35	5	0.97516	1	0.647847	5.85938e-12
GPDFFTR	CAP7_HUMAN	P20160	R.GPDFFTR.V	15.139	5	0.98696	1	1.2172	7.8125e-11
GPDFFTRV	CAP7_HUMAN	P20160	R.GPDFFTRV.A	15.139	5	0.99113	1	0.678211	3.90625e-12
GPGFVPPPPPPPYGPGR	SMR3B_HUMAN	P02814	F.GPGFVPPPPPPPYGPGR.I	67.089	19	0.99301	1	0.0159063	1.21433e-14
GPGGDPPYK	MUC5B_HUMAN	Q7M4S5	R.GPGGDPPYK.I	6.265	25	0.99304	1	0.782587	1.95313e-13
GPGIFPPPPPQP	SMR3B_HUMAN	P02814	Y.GPGIFPPPPPQP.-	67.089	19	0.99409	1	0.21815	3.30829e-13
GPGRIPPPPPAPYGPGIFPPPPPQP	SMR3B_HUMAN	P02814	Y.GPGRIPPPPPAPYGPGIFPPPPPQP.-	67.089	19	0.99314	1	0.779704	1.18186e-18
GPGVPFQR	LEG7_HUMAN	P47929	R.GPGVPFQR.G	56.618	11	0.99322	1	0.677327	7.8125e-12
GPLAPPQPFGPGFVPPPPPPPYGPGR	SMR3B_HUMAN	P02814	P.GPLAPPQPFGPGFVPPPPPPPYGPGR.I	67.089	19	0.99278	1	0.092919	3.76256e-21
GPLMMYISK	EF2_HUMAN	P13639	K.GPLMMYISK.M	33.566	23	0.99343	1	0.689632	7.8125e-13
GPNLHGLFGR	CYC_HUMAN	P99999	T.GPNLHGLFGR.K	13.333	5	0.99348	0.692988	1.01803	3.90625e-13
GPPPPAGGNPQQPQAPPAGQPQGPPRPPQGGRPSRPPQ	PRB2_HUMAN	P02812	Q.GPPPPAGGNPQQPQAPPAGQPQGPPRPPQGGRPSRPPQ.-	44.952	12	0.99421	1	0.337432	5.87024e-22
GPPPPAGGNPQQPQAPPAGQPQGPPRPPQGGRPSRPPQ	PRP1_HUMAN	P04280	Q.GPPPPAGGNPQQPQAPPAGQPQGPPRPPQGGRPSRPPQ.-	53.571	12	0.99421	1	0.337432	5.87024e-22
GPPPPGGNPQQPLPPPAGKPQGPPPPPQGGRPHRPPQGQPPQ	PRB3_HUMAN	Q04118	Q.GPPPPGGNPQQPLPPPAGKPQGPPPPPQGGRPHRPPQGQPPQ.-	17.476	9	0.99184	1	0.399912	8.24626e-22
GPPPPGKPQGPPAQGGSK	PRP1_HUMAN	P04280	Q.GPPPPGKPQGPPAQGGSK.S	53.571	12	0.99183	1	-0.170552	1.19635e-19
GPPPPGKPQGPPPQGDK	PRB2_HUMAN	P02812	Q.GPPPPGKPQGPPPQGDK.S	44.952	12	0.99423	1	0.10213	3.71391e-17
GPPPPGKPQGPPPQGDK	PRP1_HUMAN	P04280	Q.GPPPPGKPQGPPPQGDK.S	53.571	12	0.99423	1	0.10213	3.71391e-17
GPPPPGKPQGPPPQGDKSR	PRB2_HUMAN	P02812	Q.GPPPPGKPQGPPPQGDKSR.S	44.952	12	0.99169	1	0.035658	4.31033e-19
GPPPPGKPQGPPPQGDKSR	PRP1_HUMAN	P04280	Q.GPPPPGKPQGPPPQGDKSR.S	53.571	12	0.99169	1	0.035658	4.31033e-19
GPPPPGKPQGPPPQGDNK	PRB2_HUMAN	P02812	Q.GPPPPGKPQGPPPQGDNK.S	44.952	12	0.99413	1	0.146267	1.8217e-19
GPPPPGKPQGPPPQGGSK	PRB2_HUMAN	P02812	Q.GPPPPGKPQGPPPQGGSK.S	44.952	12	0.9937	1	0.0147718	2.56758e-21
GPPPPPPGKPQGPPPQGGRPQGPPQGQSPQ	PRPC_HUMAN	P02810	Q.GPPPPPPGKPQGPPPQGGRPQGPPQGQSPQ.-	51.807	18	0.99316	1	0.760733	1.13649e-23
GPPPPPQGGRPHRPPQGQPPQ	PRB3_HUMAN	Q04118	Q.GPPPPPQGGRPHRPPQGQPPQ.-	17.476	9	0.99297	1	0.349522	2.16823e-12
GPPPPPQGGRPPRPAQGQQPPQ	PRB4_HUMAN	P10163	Q.GPPPPPQGGRPPRPAQGQQPPQ.-	19.032	3	0.99367	1	0.160391	4.92332e-13
GPPPQGDKSQSPR	PRP1_HUMAN	P04280	Q.GPPPQGDKSQSPR.S	53.571	12	0.99275	1	1.97819	1.02661e-16
GPPPQGDNKSQSAR	PRB2_HUMAN	P02812	Q.GPPPQGDNKSQSAR.S	44.952	12	0.9884	1	1.92231	1.37332e-16
GPPPQGGNKPQGPPPPGKPQGPPAQGGSK	PRP1_HUMAN	P04280	Q.GPPPQGGNKPQGPPPPGKPQGPPAQGGSK.S	53.571	12	0.99374	1	0.129686	1.68197e-22
GPPPQGGNKPQGPPPPGKPQGPPPQGDK	PRB2_HUMAN	P02812	Q.GPPPQGGNKPQGPPPPGKPQGPPPQGDK.S	44.952	12	0.99307	1	0.487519	4.68224e-20
GPPPQGGNKPQGPPPPGKPQGPPPQGDK	PRP1_HUMAN	P04280	Q.GPPPQGGNKPQGPPPPGKPQGPPPQGDK.S	53.571	12	0.99307	1	0.487519	4.68224e-20
GPPPQGGNKPQGPPPPGKPQGPPPQGDNK	PRB2_HUMAN	P02812	Q.GPPPQGGNKPQGPPPPGKPQGPPPQGDNK.S	44.952	12	0.99288	1	-0.077514	2.02792e-20
GPPPQGGRPQGPPQGQSPQ	PRPC_HUMAN	P02810	Q.GPPPQGGRPQGPPQGQSPQ.-	51.807	18	0.99331	1	0.489626	1.02338e-23
GPPQQGGHPRPPR	PRPC_HUMAN	P02810	Q.GPPQQGGHPRPPR.G	51.807	18	0.99204	1	-0.0363118	4.88281e-17
GPPRPPQGGRPSRPPQ	PRB2_HUMAN	P02812	Q.GPPRPPQGGRPSRPPQ.-	44.952	12	0.993	1	0.934522	3.08734e-14
GPPRPPQGGRPSRPPQ	PRP1_HUMAN	P04280	Q.GPPRPPQGGRPSRPPQ.-	53.571	12	0.993	1	0.934522	3.08734e-14
GPSVFPLAPSSK	IGHG1_HUMAN	P01857	K.GPSVFPLAPSSK.S	34.848	16	0.99408	1	0.703587	4.88281e-17
GPSWDPFR	HSPB1_HUMAN	Q9UC36	R.GPSWDPFR.D	94.146	23	0.99421	1	1.47432	3.90625e-12
GPSWDPFRDWYPHSR	HSPB1_HUMAN	Q9UC36	R.GPSWDPFRDWYPHSR.L	94.146	23	0.99414	1	0.860474	6.81896e-17
GPYPPGPL	SMR3B_HUMAN	P02814	R.GPYPPGPL.A	67.089	19	0.97988	1	0.186712	7.8125e-12
GPYPPGPLAPPQPF	SMR3B_HUMAN	P02814	R.GPYPPGPLAPPQPF.G	67.089	19	0.99398	1	0.559936	9.76563e-19
GPYPPGPLAPPQPFGPGFVPPPPPPPY	SMR3B_HUMAN	P02814	R.GPYPPGPLAPPQPFGPGFVPPPPPPPY.G	67.089	19	0.99338	1	0.364638	7.10713e-20
GPYPPGPLAPPQPFGPGFVPPPPPPPYGPGR	SMR3B_HUMAN	P02814	R.GPYPPGPLAPPQPFGPGFVPPPPPPPYGPGR.I	67.089	19	0.99058	1	-0.208057	4.66739e-22
GQAAVQQLQAEGLSPR	CBR1_HUMAN	P16152	R.GQAAVQQLQAEGLSPR.F	22.022	5	0.99372	1	0.896926	5.62267e-19
GQAAVQQLQAEGLSPR	CBR3_HUMAN	O75828	R.GQAAVQQLQAEGLSPR.F	8.664	2	0.99372	1	0.896926	5.62267e-19
GQLEANLLQVLEKVEEFR	K2C80_HUMAN	Q6KB66	R.GQLEANLLQVLEKVEEFR.I	17.478	6	0.97069	1	1.44494	8.96714e-21
GQNFQVLMIMNK	TGM3_HUMAN	Q08188	R.GQNFQVLMIMNK.G	58.297	45	0.99397	1	0.740162	1.03639e-15
GQNRPGVQTQGQATGSAWVSSYDR	CRNN_HUMAN	Q9UBG3	R.GQNRPGVQTQGQATGSAWVSSYDR.Q	54.141	18	0.99406	1	-0.0865762	8.41196e-26
GQPFEVLIIASDDGFK	LEG7_HUMAN	P47929	R.GQPFEVLIIASDDGFK.A	56.618	11	0.99326	1	0.741837	5.11566e-20
GQPFEVLIIASDDGFKAV	LEG7_HUMAN	P47929	R.GQPFEVLIIASDDGFKAV.V	56.618	11	0.99198	1	0.531814	6.08163e-18
GQPFEVLIIASDDGFKAVVGDAQYHHFR	LEG7_HUMAN	P47929	R.GQPFEVLIIASDDGFKAVVGDAQYHHFR.H	56.618	11	0.97752	1	1.69097	1.79976e-19
GQPFHMLLLLSR	TGM1_HUMAN	P22735	R.GQPFHMLLLLSR.T	26.683	16	0.99327	1	1.09542	1.75085e-13
GQPREPQVYTLPPSREEMTK	IGHG2_HUMAN	P01859	K.GQPREPQVYTLPPSREEMTK.N	30.982	12	0.994	1	0.299167	1.84738e-17
GQPREPQVYTLPPSREEMTK	IGHG3_HUMAN	P01860	K.GQPREPQVYTLPPSREEMTK.N	22.546	13	0.994	1	0.299167	1.84738e-17
GQTEGKIPELLASGMVDNMTK	ILEU_HUMAN	P30740	K.GQTEGKIPELLASGMVDNMTK.L	59.367	17	0.99284	1	0.971824	2.82414e-18
GQTGGDVNVEMDAAPGVDLSR	K1C16_HUMAN	P08779	R.GQTGGDVNVEMDAAPGVDLSR.I	72.304	50	0.98872	1	-0.429189	1.47758e-23
GQVGGDVNVEMDAAPGVDLSR	K1C14_HUMAN	P02533	R.GQVGGDVNVEMDAAPGVDLSR.I	60.593	45	0.97291	1	-0.404752	9.5843e-24
GRIPPPPPAPYGPGIFPPPPPQP	SMR3B_HUMAN	P02814	P.GRIPPPPPAPYGPGIFPPPPPQP.-	67.089	19	0.99364	1	0.831079	5.30093e-16
GRLDSELR	K2C5_HUMAN	P13647	R.GRLDSELR.N	65.932	71	0.99219	0.968975	0.898991	8.40362e-11
GRLDSELR	K2C6A_HUMAN	P02538	R.GRLDSELR.G	70.035	77	0.99219	0.968975	0.898991	8.40362e-11
GRLDSELR	K2C6B_HUMAN	P04259	R.GRLDSELR.N	68.44	73	0.99219	0.968975	0.898991	8.40362e-11
GRLDSELR	K2C6C_HUMAN	P48668	R.GRLDSELR.N	67.553	75	0.99219	0.968975	0.898991	8.40362e-11
GRLDSELR	K2C79_HUMAN	Q5XKE5	R.GRLDSELR.N	13.084	12	0.99219	0.968975	0.898991	8.40362e-11
GRPHRPPQGQPPQ	PRB3_HUMAN	Q04118	G.GRPHRPPQGQPPQ.-	17.476	9	0.9934	1	0.241805	8.15702e-15
GRPQGPPQGQSPQ	PRPC_HUMAN	P02810	G.GRPQGPPQGQSPQ.-	51.807	18	0.98975	1	-0.436573	1.26953e-16
GRPQGPPQQGGHQ	PRPC_HUMAN	P02810	R.GRPQGPPQQGGHQ.Q	51.807	18	0.99331	1	0.638365	1.11887e-15
GRPQGPPQQGGHQQ	PRPC_HUMAN	P02810	R.GRPQGPPQQGGHQQ.G	51.807	18	0.9926	1	0.385053	7.91016e-18
GRPQGPPQQGGHQQG	PRPC_HUMAN	P02810	R.GRPQGPPQQGGHQQG.P	51.807	18	0.99229	1	1.19098	2.38503e-15
GRPQGPPQQGGHQQGPPPPPPGKPQ	PRPC_HUMAN	P02810	R.GRPQGPPQQGGHQQGPPPPPPGKPQ.G	51.807	18	0.99344	1	0.308935	1.13869e-18
GRPQGPPQQGGHQQGPPPPPPGKPQGPPPQG	PRPC_HUMAN	P02810	R.GRPQGPPQQGGHQQGPPPPPPGKPQGPPPQG.G	51.807	18	0.99423	1	0.273749	1.30935e-22
GRPQGPPQQGGHQQGPPPPPPGKPQGPPPQGGRPQ	PRPC_HUMAN	P02810	R.GRPQGPPQQGGHQQGPPPPPPGKPQGPPPQGGRPQ.G	51.807	18	0.99398	1	0.592823	3.37567e-27
GRPQGPPQQGGHQQGPPPPPPGKPQGPPPQGGRPQGPPQGQSPQ	PRPC_HUMAN	P02810	R.GRPQGPPQQGGHQQGPPPPPPGKPQGPPPQGGRPQGPPQGQSPQ.-	51.807	18	0.99326	1	0.372123	2.36561e-26
GRVEVLYR	DMBT1_HUMAN	Q9Y4V9	R.GRVEVLYR.G	14.463	9	0.99334	1	0.424305	1.5625e-11
GSAIVGGGKR	K2C4_HUMAN	P19013	C.GSAIVGGGKR.G	74.532	75	0.99245	1	1.76255	3.90625e-13
GSCQLGGGR	K1C13_HUMAN	P13646	G.GSCQLGGGR.G	69.869	59	0.98537	1	1.92817	1.5625e-11
GSDSVWNFHVWNEGWFVR	TGM3_HUMAN	Q08188	K.GSDSVWNFHVWNEGWFVR.S	58.297	45	0.99304	1	0.729487	2.48337e-23
GSFPWQAK	HPTR_HUMAN	P00739	K.GSFPWQAK.M	8.621	4	0.99419	1	0.732064	7.8125e-12
GSFPWQAK	HPT_HUMAN	P00738	K.GSFPWQAK.M	18.966	10	0.99419	1	0.732064	7.8125e-12
GSFSEQGINEFLR	PDIA6_HUMAN	Q15084	K.GSFSEQGINEFLR.E	11.818	3	0.99372	1	0.617788	2.52173e-15
GSFTSSSNFMSIR	DMBT1_HUMAN	Q9Y4V9	R.GSFTSSSNFMSIR.F	14.463	9	0.9937	1	0.932909	2.41699e-17
GSGGGSSGGSIGGR	K2C1_HUMAN	P04264	R.GSGGGSSGGSIGGR.G	66.77	58	0.97139	1	1.72057	5.00488e-18
GSGTAEVELKK	KPYM_HUMAN	Q9BWB5	K.GSGTAEVELKK.G	49.153	22	0.99251	1	0.337152	1.95313e-15
GSGVNAAGDGTIR	TGM1_HUMAN	P22735	R.GSGVNAAGDGTIR.E	26.683	16	0.99366	1	1.05353	5.12696e-17
GSGWLYHSDAIR	PKP1_HUMAN	Q13835	K.GSGWLYHSDAIR.T	30.254	18	0.99338	1	1.32495	2.14844e-16
GSHFFPGNNVIYEK	POF1B_HUMAN	Q8WVV4	R.GSHFFPGNNVIYEK.T	13.752	6	0.99347	1	0.988759	3.89127e-15
GSLGGGFSSGGFSGGSFSR	K1C10_HUMAN	P13645	K.GSLGGGFSSGGFSGGSFSR.G	52.74	27	0.99282	1	-0.155557	4.19617e-25
GSMYDGLADNYNYGTTSR	PKP1_HUMAN	Q13835	R.GSMYDGLADNYNYGTTSR.S	30.254	18	0.99412	1	0.533766	1.68228e-24
GSRPQGPFLIADKWPALPR	MMP9_HUMAN	P14780	R.GSRPQGPFLIADKWPALPR.K	7.638	4	0.99261	1	1.3856	3.40655e-14
GSSGGGCFGGSSGGYGGLGGFGGGSFRG	K1C10_HUMAN	P13645	R.GSSGGGCFGGSSGGYGGLGGFGGGSFRG.S	52.74	27	0.99287	1	-0.0137064	1.00381e-15
GTDLWLGVDALGLNIYEKDDKLTPK	EZRI_HUMAN	P15311	K.GTDLWLGVDALGLNIYEKDDKLTPK.I	26.28	13	0.87648	1	0.757828	9.94015e-14
GTDVNVFNTILTT	ANXA1_HUMAN	P04083	K.GTDVNVFNTILTT.R	67.052	42	0.9924	1	1.29833	1.08001e-12
GTDVNVFNTILTTR	ANXA1_HUMAN	P04083	K.GTDVNVFNTILTTR.S	67.052	42	0.99313	1	1.21021	2.34863e-17
GTGASGSFK	H11_HUMAN	Q02539	K.GTGASGSFK.L	15.349	3	0.99259	1	1.90329	1.95313e-13
GTGASGSFK	H12_HUMAN	P16403	K.GTGASGSFK.L	26.291	6	0.99259	1	1.90329	1.95313e-13
GTGASGSFK	H13_HUMAN	P16402	K.GTGASGSFK.L	25.339	6	0.99259	1	1.90329	1.95313e-13
GTGASGSFK	H14_HUMAN	P10412	K.GTGASGSFK.L	25.571	6	0.99259	1	1.90329	1.95313e-13
GTGASGSFK	H15_HUMAN	P16401	K.GTGASGSFK.L	24.336	6	0.99259	1	1.90329	1.95313e-13
GTGASGSFK	H1T_HUMAN	P22492	R.GTGASGSFK.L	11.594	2	0.99259	1	1.90329	1.95313e-13
GTIEILSDVQLIK	RLA0L_HUMAN	Q8NHW5	R.GTIEILSDVQLIK.T	17.35	5	0.99324	1	1.08858	9.68985e-14
GTIEILSDVQLIK	RLA0_HUMAN	P05388	R.GTIEILSDVQLIK.T	17.35	5	0.99324	1	1.08858	9.68985e-14
GTLSGWILSK	CALX_HUMAN	P27824	R.GTLSGWILSK.A	15.709	5	0.99217	1	1.41402	1.09375e-13
GTNPSAWVGSVEILLSYLR	TGM1_HUMAN	P22735	R.GTNPSAWVGSVEILLSYLR.T	26.683	16	0.99338	1	1.44399	2.50702e-23
GTNYLADVFEK	S10A7_HUMAN	P31151	K.GTNYLADVFEK.K	49.505	9	0.99432	1	0.709138	9.76563e-16
GTNYLADVFEKK	S10A7_HUMAN	P31151	K.GTNYLADVFEKK.D	49.505	9	0.99348	0.982233	1.10855	9.76563e-17
GVALHRPDVYLLPPAR	IGHM_HUMAN	P01871	K.GVALHRPDVYLLPPAR.E	19.027	7	0.99332	1	1.16988	1.59297e-16
GVALHRPDVYLLPPAR	MUCB_HUMAN	P04220	K.GVALHRPDVYLLPPAR.E	15.857	5	0.99332	1	1.16988	1.59297e-16
GVDEATIIDILTK	ANXA1_HUMAN	P04083	K.GVDEATIIDILTK.R	67.052	42	0.99308	1	0.375407	4.10156e-16
GVDEATIIDILTKR	ANXA1_HUMAN	P04083	K.GVDEATIIDILTKR.N	67.052	42	0.99264	1	1.1224	4.20532e-17
GVDEVTIVNILTNR	ANXA2_HUMAN	P07355	K.GVDEVTIVNILTNR.S	53.097	24	0.99316	1	0.312613	1.12305e-17
GVDIVMDPLGGSDTAK	VAT1_HUMAN	Q99536	K.GVDIVMDPLGGSDTAK.G	8.906	2	0.99221	1	0.5009	1.83608e-12
GVFGGVSGSGSGGYK	K22O_HUMAN	Q01546	R.GVFGGVSGSGSGGYK.G	46.082	34	0.99403	1	-0.0422175	6.40869e-20
GVLLEIEDLQVNQFK	IQGA1_HUMAN	P46940	K.GVLLEIEDLQVNQFK.N	8.69	9	0.99364	1	0.436139	1.08194e-13
GVQYLNEIKDSVVAGFQWATK	EF2_HUMAN	P13639	K.GVQYLNEIKDSVVAGFQWATK.E	33.566	23	0.99341	1	1.94268	1.15933e-22
GVVPLAGTNGETTTQGLDGLSER	ALDOA_HUMAN	P04075	K.GVVPLAGTNGETTTQGLDGLSER.C	34.341	13	0.9943	1	0.0885901	1.55255e-27
GVYSSDVFDIFPGTYQTLEMFPR	CERU_HUMAN	P00450	R.GVYSSDVFDIFPGTYQTLEMFPR.T	9.108	5	0.99289	1	1.17219	2.75306e-19
GYDVIAQAQSGTGK	IF4A1_HUMAN	P60842	K.GYDVIAQAQSGTGK.T	21.429	7	0.99386	1	1.80435	3.6583e-17
GYDVIAQAQSGTGK	IF4A2_HUMAN	Q14240	K.GYDVIAQAQSGTGK.T	13.022	4	0.99386	1	1.80435	3.6583e-17
GYEEWLLNEIR	ACTN1_HUMAN	P12814	K.GYEEWLLNEIR.R	13.901	10	0.99232	1	0.509538	3.14224e-14
GYEEWLLNEIR	ACTN2_HUMAN	P35609	K.GYEEWLLNEIR.R	5.369	4	0.99232	1	0.509538	3.14224e-14
GYEEWLLNEIR	ACTN4_HUMAN	O43707	K.GYEEWLLNEIR.R	42.371	27	0.99232	1	0.509538	3.14224e-14
GYFNEELSEILSDPSDDTK	DESP_HUMAN	P15924	R.GYFNEELSEILSDPSDDTK.G	49.739	138	0.99357	1	0.827541	2.39111e-20
GYFNEELSEILSDPSDDTKGFFDPNTEENLTYLQLK	DESP_HUMAN	P15924	R.GYFNEELSEILSDPSDDTKGFFDPNTEENLTYLQLK.E	49.739	138	0.99311	1	0.747301	1.71002e-24
GYISPYFINTSK	CH60_HUMAN	P10809	R.GYISPYFINTSK.G	9.599	4	0.99278	1	1.01563	1.24961e-13
GYSFTTTAER	ACTB_HUMAN	Q96HG5	R.GYSFTTTAER.E	80.8	48	0.9938	1	0.505868	9.76563e-15
GYSFTTTAER	ACTG_HUMAN	P63261	R.GYSFTTTAER.E	80.8	48	0.9938	1	0.505868	9.76563e-15
GYSFTTTAEREIVR	ACTB_HUMAN	Q96HG5	R.GYSFTTTAEREIVR.D	80.8	48	0.99334	1	0.981142	3.82664e-14
GYSFTTTAEREIVR	ACTG_HUMAN	P63261	R.GYSFTTTAEREIVR.D	80.8	48	0.99334	1	0.981142	3.82664e-14
HAETSSGGQAASSHEQAR	FILA_HUMAN	P20930	P.HAETSSGGQAASSHEQAR.S	10.416	13	0.99218	1	1.91419	1.66321e-23
HALIIYDDLSK	ATPA_HUMAN	P25705	K.HALIIYDDLSK.Q	20.253	7	0.99347	1	0.655793	3.38086e-14
HEERQDEHGYISR	HSPB1_HUMAN	Q9UC36	K.HEERQDEHGYISR.C	94.146	23	0.99222	1	0.211936	4.88281e-18
HEISEMNR	K2C5_HUMAN	P13647	K.HEISEMNR.M	65.932	71	0.99304	1	0.354575	7.8125e-12
HFSPEELK	CRYAB_HUMAN	P02511	K.HFSPEELK.V	42.857	5	0.99374	1	0.846282	7.8125e-12
HFSVEGQLEFR	H90B3_HUMAN	Q58FF7	K.HFSVEGQLEFR.A	12.563	6	0.99424	1	1.15445	1.95313e-15
HFSVEGQLEFR	HS902_HUMAN	Q14568	K.HFSVEGQLEFR.A	20.408	6	0.99424	1	1.15445	1.95313e-15
HFSVEGQLEFR	HS904_HUMAN	Q58FG1	K.HFSVEGQLEFR.A	5.742	2	0.99424	1	1.15445	1.95313e-15
HFSVEGQLEFR	HS90A_HUMAN	P07900	K.HFSVEGQLEFR.A	19.945	13	0.99424	1	1.15445	1.95313e-15
HFSVEGQLEFR	HS90B_HUMAN	P08238	K.HFSVEGQLEFR.A	24.171	15	0.99424	1	1.15445	1.95313e-15
HFVALSTNTTK	G6PI_HUMAN	P06744	K.HFVALSTNTTK.V	38.351	14	0.99299	1	0.881787	9.76563e-16
HGESAWNLENR	PGAM1_HUMAN	P18669	R.HGESAWNLENR.F	42.913	9	0.99415	1	0.387772	9.76563e-16
HGGGGGGFGGGGFGSR	K22E_HUMAN	P35908	R.HGGGGGGFGGGGFGSR.S	40.845	30	0.99308	1	0.785707	1.52588e-22
HGIVEDWDLMER	ARP3_HUMAN	P61158	R.HGIVEDWDLMER.F	10.766	4	0.99311	1	1.38875	2.51709e-16
HGSLGFLPR	RL3_HUMAN	P39023	R.HGSLGFLPR.K	9.677	3	0.99251	1	0.863074	7.8125e-13
HGTDDGVVWMNWK	FIBB_HUMAN	P02675	K.HGTDDGVVWMNWK.G	26.477	10	0.99308	1	1.2064	1.2207e-18
HGVYNPNK	MDHM_HUMAN	P40926	K.HGVYNPNK.I	27.219	7	0.99333	1	1.92742	3.90625e-12
HGYIGEFEIIDDHR	RS15A_HUMAN	P62244	K.HGYIGEFEIIDDHR.A	17.692	2	0.99305	1	0.920346	1.11951e-17
HHEASSHADISR	FILA_HUMAN	P20930	R.HHEASSHADISR.H	10.416	13	0.97796	1	1.71944	1.2207e-16
HHEASTHADISR	FILA_HUMAN	P20930	R.HHEASTHADISR.H	10.416	13	0.9927	1	1.54704	9.76563e-17
HHLLASDEEIQDVSGTWYLK	LC1L1_HUMAN	Q5VSP4	A.HHLLASDEEIQDVSGTWYLK.A	29.012	5	0.99403	1	0.263531	1.2207e-24
HHLLASDEEIQDVSGTWYLK	LCN1_HUMAN	P31025	A.HHLLASDEEIQDVSGTWYLK.A	76.136	13	0.99403	1	0.263531	1.2207e-24
HIADLAGNSEVILPVPAFNV	ENOA_HUMAN	Q6GMP2	R.HIADLAGNSEVILPVPAFNV.I	64.977	24	0.99126	1	0.670761	3.31185e-12
HIADLAGNSEVILPVPAFNVINGGSHAGNK	ENOA_HUMAN	Q6GMP2	R.HIADLAGNSEVILPVPAFNVINGGSHAGNK.L	64.977	24	0.99348	1	0.396903	1.62035e-21
HIAEEADR	TPM3_HUMAN	P06753	K.HIAEEADR.K	10.211	4	0.99052	1	1.92072	7.8125e-12
HIAEEADR	TPM4_HUMAN	Q9UCS3	K.HIAEEADR.K	16.129	5	0.99052	1	1.92072	7.8125e-12
HIAEEADRKYEEVAR	TPM3_HUMAN	P06753	K.HIAEEADRKYEEVAR.K	10.211	4	0.99279	1	1.43226	1.49241e-18
HIAEEADRKYEEVAR	TPM4_HUMAN	Q9UCS3	K.HIAEEADRKYEEVAR.K	16.129	5	0.99279	1	1.43226	1.49241e-18
HIFSEDTSDFSGMSETK	SPB5_HUMAN	P36952	K.HIFSEDTSDFSGMSETK.G	29.067	8	0.99351	1	1.434	1.52588e-23
HIVLSGGSTMYPGLPSR	ARP2_HUMAN	P61160	K.HIVLSGGSTMYPGLPSR.L	15.99	5	0.99355	1	1.30261	3.83046e-14
HIYYITGETK	HS90A_HUMAN	P07900	K.HIYYITGETK.D	19.945	13	0.99412	1	0.757998	3.90625e-14
HKELAPYDENWFYTR	RS19_HUMAN	P39019	K.HKELAPYDENWFYTR.A	16.552	2	0.99287	1	0.626144	9.003e-16
HKQSLEEAAK	DESP_HUMAN	P15924	R.HKQSLEEAAK.T	49.739	138	0.99291	1	1.66963	7.8125e-14
HKTGPNLHGLFGR	CYC_HUMAN	P99999	K.HKTGPNLHGLFGR.K	13.333	5	0.99417	0.999979	0.795662	9.76563e-18
HLAMAPNHAVVSR	TRFL_HUMAN	Q8TCD2	C.HLAMAPNHAVVSR.M	34.085	34	0.99352	1	1.1819	4.63867e-16
HLEEEEGQLK	INVO_HUMAN	P07476	K.HLEEEEGQLK.H	34.359	17	0.99059	1	0.847195	7.8125e-14
HLEEEEGQLKHLVQQEGQLK	INVO_HUMAN	P07476	K.HLEEEEGQLKHLVQQEGQLK.H	34.359	17	0.99318	1	1.14477	3.20583e-20
HLEEPLSLQELDTSSGVLLPFFDPDTNIVYLCGKG	COR1A_HUMAN	P31146	K.HLEEPLSLQELDTSSGVLLPFFDPDTNIVYLCGKG.D	31.67	9	0.99235	1	1.27931	1.15421e-21
HLEEQEGQLK	INVO_HUMAN	P07476	K.HLEEQEGQLK.H	34.359	17	0.99364	1	0.451555	1.5625e-13
HLEHPEQQDGQLK	INVO_HUMAN	P07476	K.HLEHPEQQDGQLK.H	34.359	17	0.99306	1	0.382859	3.90625e-17
HLEHQEGQLEVPEEQMGQLK	INVO_HUMAN	P07476	K.HLEHQEGQLEVPEEQMGQLK.Y	34.359	17	0.99329	1	1.43682	5.01599e-19
HLEINPDHPIVETLR	HS90B_HUMAN	P08238	K.HLEINPDHPIVETLR.Q	24.171	15	0.99376	1	0.72449	8.22002e-17
HLEINPDHSIIETLR	HS90A_HUMAN	P07900	K.HLEINPDHSIIETLR.Q	19.945	13	0.99287	1	1.00283	8.56892e-19
HLEQQEGQLEQLEEQEGQLK	INVO_HUMAN	P07476	K.HLEQQEGQLEQLEEQEGQLK.H	34.359	17	0.99333	1	0.467529	3.93017e-21
HLEQQEGQLK	INVO_HUMAN	P07476	K.HLEQQEGQLK.H	34.359	17	0.99268	1	0.402858	3.125e-13
HLEQQEGQPK	INVO_HUMAN	P07476	K.HLEQQEGQPK.H	34.359	17	0.99403	1	1.44434	1.5625e-13
HLGTLIGLNPVGPESQIR	BPIL1_HUMAN	Q8N4F0	V.HLGTLIGLNPVGPESQIR.Y	41.266	14	0.99416	1	0.920659	4.12926e-21
HLNEEELGQLQTQASDTSVVLSMDNNR	K2C78_HUMAN	Q8N1N4	K.HLNEEELGQLQTQASDTSVVLSMDNNR.Y	44.038	31	0.99281	1	0.187751	1.75764e-23
HLQLAIRNDEELNKLLGK	H2A1D_HUMAN	P20671	R.HLQLAIRNDEELNKLLGK.V	57.692	14	0.99274	1	0.96744	5.12908e-18
HLQLAIRNDEELNKLLGK	H2A1H_HUMAN	Q96KK5	R.HLQLAIRNDEELNKLLGK.V	64.062	15	0.99274	1	0.96744	5.12908e-18
HLQLAIRNDEELNKLLGK	H2A1J_HUMAN	Q99878	R.HLQLAIRNDEELNKLLGK.V	64.062	15	0.99274	1	0.96744	5.12908e-18
HLQLAIRNDEELNKLLGK	H2A1_HUMAN	P0C0S8	R.HLQLAIRNDEELNKLLGK.V	63.077	15	0.99274	1	0.96744	5.12908e-18
HLQLAIRNDEELNKLLGK	H2A2A_HUMAN	Q6FI13	R.HLQLAIRNDEELNKLLGK.V	63.077	16	0.99274	1	0.96744	5.12908e-18
HLQLAIRNDEELNKLLGK	H2A2C_HUMAN	Q16777	R.HLQLAIRNDEELNKLLGK.V	63.566	16	0.99274	1	0.96744	5.12908e-18
HLQLAIRNDEELNKLLGK	H2AJ_HUMAN	Q9BTM1	R.HLQLAIRNDEELNKLLGK.V	63.566	15	0.99274	1	0.96744	5.12908e-18
HLQLAIRNDEELNKLLGR	H2A1B_HUMAN	P04908	R.HLQLAIRNDEELNKLLGR.V	57.692	14	0.99262	1	1.22242	1.04539e-16
HLQLAIRNDEELNKLLGR	H2A1C_HUMAN	Q93077	R.HLQLAIRNDEELNKLLGR.V	63.077	15	0.99262	1	1.22242	1.04539e-16
HLQLAIRNDEELNKLLGR	H2A3_HUMAN	Q7L7L0	R.HLQLAIRNDEELNKLLGR.V	57.692	14	0.99262	1	1.22242	1.04539e-16
HLSMFILLPK	SPB5_HUMAN	P36952	K.HLSMFILLPK.D	29.067	8	0.99357	1	0.775239	1.5625e-13
HLTGEFEK	RAN_HUMAN	Q9CWI7	R.HLTGEFEK.K	20.37	4	0.98835	1	1.36878	7.42188e-11
HLTSNSPR	PLAK_HUMAN	P14923	K.HLTSNSPR.L	42.55	30	0.99225	1	1.9288	7.8125e-12
HLVPGAPFLLQALVR	CO4A_HUMAN	Q5JQM8	R.HLVPGAPFLLQALVR.E	3.727	4	0.98901	1	1.28585	6.20028e-14
HLVPGAPFLLQALVR	CO4B_HUMAN	Q9UIP5	R.HLVPGAPFLLQALVR.E	3.727	4	0.98901	1	1.28585	6.20028e-14
HLVQQEGQLEQQER	INVO_HUMAN	P07476	K.HLVQQEGQLEQQER.Q	34.359	17	0.99314	1	1.19151	7.8125e-18
HLVQQEGQLK	INVO_HUMAN	P07476	K.HLVQQEGQLK.H	34.359	17	0.99277	1	0.380693	3.125e-13
HLWDYTFGPEK	ARP2_HUMAN	P61160	K.HLWDYTFGPEK.L	15.99	5	0.99273	1	0.59663	1.05188e-13
HMWPGDIK	AMY1_HUMAN	P04745	K.HMWPGDIK.A	65.362	60	0.99344	1	0.431973	7.8125e-12
HMWPGDIK	AMY2B_HUMAN	P19961	K.HMWPGDIK.A	53.816	42	0.99344	1	0.431973	7.8125e-12
HMWPGDIK	AMYP_HUMAN	P04746	K.HMWPGDIK.A	45.597	37	0.99344	1	0.431973	7.8125e-12
HNESNSILFFGR	SPB13_HUMAN	Q9UIV8	R.HNESNSILFFGR.F	19.437	5	0.99334	1	0.966197	9.76563e-17
HNQLPLVIEFTEQTAPK	PDIA1_HUMAN	P07237	K.HNQLPLVIEFTEQTAPK.I	48.819	20	0.9921	1	1.43867	3.52783e-21
HNSSGSILFLGR	ILEU_HUMAN	P30740	R.HNSSGSILFLGR.F	59.367	17	0.99348	1	1.88898	1.95313e-16
HPEAEMAQNSVR	PLAK_HUMAN	P14923	R.HPEAEMAQNSVR.L	42.55	30	0.99286	1	0.580276	4.77649e-14
HPQEQPLW	PROL4_HUMAN	Q16378	R.HPQEQPLW.-	19.403	5	0.99303	1	0.867539	3.125e-11
HPYFYAPELL	ALBU_HUMAN	Q9P157	R.HPYFYAPELL.F	41.544	47	0.99321	1	0.915412	3.90625e-14
HPYFYAPELLFFAK	ALBU_HUMAN	Q9P157	R.HPYFYAPELLFFAK.R	41.544	47	0.99288	1	0.855968	2.44141e-19
HQGVMVGMGQK	ACTA_HUMAN	P62736	R.HQGVMVGMGQK.D	46.154	28	0.99345	1	1.06188	1.95313e-15
HQGVMVGMGQK	ACTBL_HUMAN	Q562R1	R.HQGVMVGMGQK.D	28.457	15	0.99345	1	1.06188	1.95313e-15
HQGVMVGMGQK	ACTB_HUMAN	Q96HG5	R.HQGVMVGMGQK.D	80.8	48	0.99345	1	1.06188	1.95313e-15
HQGVMVGMGQK	ACTC_HUMAN	P68032	R.HQGVMVGMGQK.D	48.806	32	0.99345	1	1.06188	1.95313e-15
HQGVMVGMGQK	ACTG_HUMAN	P63261	R.HQGVMVGMGQK.D	80.8	48	0.99345	1	1.06188	1.95313e-15
HQGVMVGMGQK	ACTH_HUMAN	P63267	R.HQGVMVGMGQK.D	46.277	28	0.99345	1	1.06188	1.95313e-15
HQGVMVGMGQK	ACTS_HUMAN	P68133	R.HQGVMVGMGQK.D	45.093	30	0.99345	1	1.06188	1.95313e-15
HQLYIDETVNSNIPTNLR	FIBB_HUMAN	P02675	K.HQLYIDETVNSNIPTNLR.V	26.477	10	0.99352	1	0.693061	1.46939e-19
HQPTAIIAK	TKT_HUMAN	P29401	K.HQPTAIIAK.T	30.337	13	0.99008	1	0.887306	1.5625e-12
HQTVPQNTGGK	TRFE_HUMAN	P02787	K.HQTVPQNTGGK.N	29.37	20	0.99342	1	2.00886	1.95313e-15
HSASQDGQDTIR	FILA_HUMAN	P20930	R.HSASQDGQDTIR.G	10.416	13	0.99382	1	0.25434	1.95313e-16
HSASQEGQDTIR	FILA_HUMAN	P20930	R.HSASQEGQDTIR.G	10.416	13	0.99275	1	0.238624	1.95313e-16
HSGIGHGQASSAVR	FILA_HUMAN	P20930	R.HSGIGHGQASSAVR.D	10.416	13	0.99311	1	0.248335	2.50244e-19
HSQDLAFLSMLNDIAAVPATAMPFR	FAS_HUMAN	Q96IT0	R.HSQDLAFLSMLNDIAAVPATAMPFR.G	2.469	3	0.98803	1	1.14125	8.42439e-16
HSQVGQGQSSGPR	FILA_HUMAN	P20930	R.HSQVGQGQSSGPR.T	10.416	13	0.99281	1	1.9442	9.76563e-18
HSTIFENLANK	TRFE_HUMAN	P02787	K.HSTIFENLANK.A	29.37	20	0.99296	1	1.12459	1.95313e-15
HSTSQEGQDTIHGHPGSSSGGR	FILA_HUMAN	P20930	R.HSTSQEGQDTIHGHPGSSSGGR.Q	10.416	13	0.99265	1	0.179308	1.42293e-23
HSWSHHHEASTQADSSR	FILA_HUMAN	P20930	R.HSWSHHHEASTQADSSR.H	10.416	13	0.99239	1	1.47751	3.8147e-23
HTADRWR	HSPB1_HUMAN	Q9UC36	R.HTADRWR.V	94.146	23	0.99162	1	1.46641	7.8125e-11
HTDNVIQWLNAMDEIGLPK	IQGA1_HUMAN	P46940	R.HTDNVIQWLNAMDEIGLPK.I	8.69	9	0.99299	1	1.27642	1.12357e-18
HTNYTMEHIR	ACTN1_HUMAN	P12814	K.HTNYTMEHIR.V	13.901	10	0.9937	1	1.09088	3.03272e-14
HTNYTMEHIR	ACTN2_HUMAN	P35609	K.HTNYTMEHIR.V	5.369	4	0.9937	1	1.09088	3.03272e-14
HTNYTMEHIR	ACTN4_HUMAN	O43707	K.HTNYTMEHIR.V	42.371	27	0.9937	1	1.09088	3.03272e-14
HTQTSSGGQAASSHEQAR	FILA_HUMAN	P20930	R.HTQTSSGGQAASSHEQAR.S	10.416	13	0.98922	1	1.95048	3.12805e-24
HVAAGTQQPYTDGVR	PLAK_HUMAN	P14923	R.HVAAGTQQPYTDGVR.M	42.55	30	0.99294	1	1.18572	7.55457e-19
HVEDVPAFQALGSLNDLQFFR	ZA2G_HUMAN	P25311	K.HVEDVPAFQALGSLNDLQFFR.Y	43.96	13	0.99295	1	0.250354	6.88614e-24
HVEIDPEIQK	K2C4_HUMAN	P19013	L.HVEIDPEIQK.V	74.532	75	0.99312	1	0.475707	7.8125e-13
HVFGESDELIGQK	TPIS_HUMAN	P60174	R.HVFGESDELIGQK.V	53.012	9	0.99328	1	0.596824	9.76563e-18
HVFGQPAK	COR1A_HUMAN	P31146	R.HVFGQPAK.A	31.67	9	0.99303	1	0.356725	1.17188e-11
HVGTEGSMATVGLSQQLFDSALLLLQK	BPIL1_HUMAN	Q8N4F0	R.HVGTEGSMATVGLSQQLFDSALLLLQK.A	41.266	14	0.99267	1	0.289641	2.58534e-22
HVIEIHIV	CAH6_HUMAN	P23280	R.HVIEIHIV.H	38.636	12	0.93842	1	0.52245	3.125e-11
HVIPMNPNTDDLFK	PLST_HUMAN	P13797	R.HVIPMNPNTDDLFK.A	16.984	8	0.99351	1	1.18283	2.08103e-15
HVLVTLGEK	MYL6_HUMAN	P60660	R.HVLVTLGEK.M	40.397	5	0.99378	1	0.578233	7.8125e-13
HWGGNVLGPK	RL7A_HUMAN	P62424	R.HWGGNVLGPK.S	9.774	2	0.94725	1	1.0448	4.01367e-14
HWPFMVVNDAGRPK	HSP7C_HUMAN	P11142	K.HWPFMVVNDAGRPK.V	39.783	24	0.99359	1	0.833301	2.36638e-16
HWPFQVINDGDKPK	HSP71_HUMAN	P08107	K.HWPFQVINDGDKPK.V	43.058	20	0.99324	1	0.88931	2.54782e-18
HYDGSYSTFGER	A2MG_HUMAN	P01023	K.HYDGSYSTFGER.Y	24.763	26	0.99343	1	0.786264	7.75844e-16
HYEGSTVPEKK	HPT_HUMAN	P00738	R.HYEGSTVPEKK.T	18.966	10	0.99343	1	0.404042	3.02417e-15
HYFQNTQGLIFVVDSNDRER	ARF1_HUMAN	P84077	R.HYFQNTQGLIFVVDSNDRER.V	30.939	3	0.99418	1	1.07218	7.87879e-20
HYFQNTQGLIFVVDSNDRER	ARF3_HUMAN	P61204	R.HYFQNTQGLIFVVDSNDRER.V	30.939	3	0.99418	1	1.07218	7.87879e-20
HYGGLTGLNK	PGAM1_HUMAN	P18669	R.HYGGLTGLNK.A	42.913	9	0.99285	1	1.1905	5.11231e-13
HYGGLTGLNK	PGAM2_HUMAN	P15259	R.HYGGLTGLNK.A	16.206	4	0.99285	1	1.1905	5.11231e-13
HYGGLTGLNK	PGAM4_HUMAN	Q8N0Y7	R.HYGGLTGLNK.A	27.165	6	0.99285	1	1.1905	5.11231e-13
HYGGLTGLNKAETAAK	PGAM1_HUMAN	P18669	R.HYGGLTGLNKAETAAK.H	42.913	9	0.99363	1	0.76725	8.78907e-21
HYGGLTGLNKAETAAK	PGAM2_HUMAN	P15259	R.HYGGLTGLNKAETAAK.H	16.206	4	0.99363	1	0.76725	8.78907e-21
HYGGLTGLNKAETAAK	PGAM4_HUMAN	Q8N0Y7	R.HYGGLTGLNKAETAAK.H	27.165	6	0.99363	1	0.76725	8.78907e-21
HYGPGWVSMANAGK	PPIB_HUMAN	P23284	K.HYGPGWVSMANAGK.D	36.111	7	0.99342	1	1.09501	3.06046e-16
IAESNHIK	ACTN4_HUMAN	O43707	R.IAESNHIK.L	42.371	27	0.99335	1	0.322904	1.5625e-11
IAEYMNHLI	AMY1_HUMAN	P04745	K.IAEYMNHLI.D	65.362	60	0.99318	1	0.875517	1.5625e-12
IAEYMNHLI	AMY2B_HUMAN	P19961	K.IAEYMNHLI.D	53.816	42	0.99318	1	0.875517	1.5625e-12
IAEYMNHLI	AMYP_HUMAN	P04746	K.IAEYMNHLI.D	45.597	37	0.99318	1	0.875517	1.5625e-12
IAEYMNHLIDIGV	AMY1_HUMAN	P04745	K.IAEYMNHLIDIGV.A	65.362	60	0.99046	1	1.11223	3.96456e-12
IAEYMNHLIDIGV	AMY2B_HUMAN	P19961	K.IAEYMNHLIDIGV.A	53.816	42	0.99046	1	1.11223	3.96456e-12
IAEYMNHLIDIGV	AMYP_HUMAN	P04746	K.IAEYMNHLIDIGV.A	45.597	37	0.99046	1	1.11223	3.96456e-12
IAEYMNHLIDIGVAGFR	AMY1_HUMAN	P04745	K.IAEYMNHLIDIGVAGFR.I	65.362	60	0.99339	1	0.569402	1.83106e-22
IAEYMNHLIDIGVAGFR	AMY2B_HUMAN	P19961	K.IAEYMNHLIDIGVAGFR.L	53.816	42	0.99339	1	0.569402	1.83106e-22
IAEYMNHLIDIGVAGFR	AMYP_HUMAN	P04746	K.IAEYMNHLIDIGVAGFR.L	45.597	37	0.99339	1	0.569402	1.83106e-22
IALLEEAR	EZRI_HUMAN	P15311	K.IALLEEAR.R	26.28	13	0.99006	0.506919	1.24726	3.125e-11
IALTDNALIAR	RL7_HUMAN	P18124	R.IALTDNALIAR.S	14.919	3	0.99373	1	0.879816	7.8125e-15
IANLQTDLSDGLR	FLNA_HUMAN	P21333	R.IANLQTDLSDGLR.L	1.964	4	0.99154	1	-0.160241	1.43181e-13
IANVFTNAFR	PERM_HUMAN	P05164	R.IANVFTNAFR.Y	29.396	23	0.99029	1	1.42566	1.95313e-14
IAQHHVAPR	NCRP1_HUMAN	Q6ZVX7	V.IAQHHVAPR.T	24.727	4	0.99037	1	1.77779	7.8125e-12
IAQLEEQLDNETKER	MYH9_HUMAN	P35579	K.IAQLEEQLDNETKER.Q	15.357	24	0.99302	1	0.757121	8.37726e-15
IAQWQSFQLEGGLK	A2MG_HUMAN	P01023	R.IAQWQSFQLEGGLK.Q	24.763	26	0.99278	1	1.06831	3.90625e-18
IAVVGEGR	WDR1_HUMAN	O75083	R.IAVVGEGR.E	13.036	6	0.98196	1	1.15216	7.8125e-12
IDFSEFLSLLGDIATDYHK	S10A7_HUMAN	P31151	K.IDFSEFLSLLGDIATDYHK.Q	49.505	9	0.99297	1	0.980359	7.01599e-23
IDINMSGFNETDDLKR	PLST_HUMAN	P13797	R.IDINMSGFNETDDLKR.A	16.984	8	0.99274	1	0.838566	1.76718e-13
IDKQIDFR	DESP_HUMAN	P15924	R.IDKQIDFR.L	49.739	138	0.98476	1	0.572103	6.25e-11
IDLGGEPIK	AMY1_HUMAN	P04745	V.IDLGGEPIK.S	65.362	60	0.99402	1	0.595839	1.5625e-11
IDLGGEPIK	AMY2B_HUMAN	P19961	V.IDLGGEPIK.S	53.816	42	0.99402	1	0.595839	1.5625e-11
IDLGGEPIK	AMYP_HUMAN	P04746	V.IDLGGEPIK.S	45.597	37	0.99402	1	0.595839	1.5625e-11
IDLGGEPIKSSDYFGNGR	AMY1_HUMAN	P04745	V.IDLGGEPIKSSDYFGNGR.V	65.362	60	0.99378	1	0.450328	7.62259e-19
IDLGGEPIKSSDYFGNGR	AMY2B_HUMAN	P19961	V.IDLGGEPIKSSDYFGNGR.V	53.816	42	0.99378	1	0.450328	7.62259e-19
IDLGGEPIKSSDYFGNGR	AMYP_HUMAN	P04746	V.IDLGGEPIKSSDYFGNGR.V	45.597	37	0.99378	1	0.450328	7.62259e-19
IDNSQVESGSLEDDWDFLPPKK	CALR_HUMAN	P27797	K.IDNSQVESGSLEDDWDFLPPKK.I	16.067	4	0.93901	1	0.804468	4.90737e-13
IDQMWLPVVR	PGAM1_HUMAN	P18669	A.IDQMWLPVVR.T	42.913	9	0.994	1	1.0482	1.21122e-11
IDQMWLPVVR	PGAM4_HUMAN	Q8N0Y7	A.IDQMWLPVVR.T	27.165	6	0.994	1	1.0482	1.21122e-11
IDRAETLGR	EVPL_HUMAN	Q92817	R.IDRAETLGR.T	19.97	31	0.89116	1	0.629106	3.98438e-12
IDSGLYLGSGYFTAI	TRFL_HUMAN	Q8TCD2	R.IDSGLYLGSGYFTAI.Q	34.085	34	0.99346	1	1.20442	2.7992e-17
IDSGLYLGSGYFTAIQNLR	TRFL_HUMAN	Q8TCD2	R.IDSGLYLGSGYFTAIQNLR.K	34.085	34	0.99296	1	0.142544	3.11198e-22
IDSGLYLGSGYFTAIQNLRK	TRFL_HUMAN	Q8TCD2	R.IDSGLYLGSGYFTAIQNLRK.S	34.085	34	0.99278	1	1.10014	4.80568e-22
IDVPTLGPK	TGM3_HUMAN	Q08188	K.IDVPTLGPK.E	58.297	45	0.98504	1	1.03586	7.8125e-13
IDVVPIEPHALFLGIHGGK	IL1RA_HUMAN	P18510	K.IDVVPIEPHALFLGIHGGK.M	38.418	5	0.99377	1	1.38236	2.12681e-21
IEEELGSK	ENOA_HUMAN	Q6GMP2	R.IEEELGSK.A	64.977	24	0.99121	1	1.16187	1.5625e-11
IEEILDYLR	CAH6_HUMAN	P23280	K.IEEILDYLR.R	38.636	12	0.99401	1	1.05675	3.125e-12
IEEILDYLRR	CAH6_HUMAN	P23280	K.IEEILDYLRR.A	38.636	12	0.99432	1	1.0978	1.5625e-13
IEENILSSELLR	DSG3_HUMAN	P32926	R.IEENILSSELLR.F	9.61	7	0.9933	1	1.19115	3.59375e-15
IEIDPQFQVVR	K2C78_HUMAN	Q8N1N4	K.IEIDPQFQVVR.T	44.038	31	0.99389	1	0.80709	7.8125e-15
IEISELNR	K22E_HUMAN	P35908	K.IEISELNR.V	40.845	30	0.99418	0.999997	0.706306	3.125e-11
IEISELNR	K2C1_HUMAN	P04264	K.IEISELNR.V	66.77	58	0.99418	0.999997	0.706306	3.125e-11
IENHEGVR	KPYM_HUMAN	Q9BWB5	K.IENHEGVR.R	49.153	22	0.99208	1	1.87701	7.8125e-12
IEPHTGLLLLSVQK	DESP_HUMAN	P15924	R.IEPHTGLLLLSVQK.R	49.739	138	0.99397	1	0.901928	3.22266e-13
IEQDYWQVPR	GBP6_HUMAN	Q6ZN66	R.IEQDYWQVPR.K	35.387	19	0.99279	1	0.282295	9.96094e-14
IEVEKPFAIAKE	PPIB_HUMAN	P23284	K.IEVEKPFAIAKE.-	36.111	7	0.99316	1	1.46792	5.37994e-11
IEVLEEELR	DESP_HUMAN	P15924	K.IEVLEEELR.L	49.739	138	0.99406	1	0.850432	1.5625e-12
IFENGYDPV	ELNE_HUMAN	P08246	R.IFENGYDPV.N	28.464	9	0.97245	1	0.610937	7.84375e-12
IFENGYDPVNLLNDIV	ELNE_HUMAN	P08246	R.IFENGYDPVNLLNDIV.I	28.464	9	0.99024	1	0.131849	1.45847e-14
IFGPIWNR	G6PD_HUMAN	P11413	R.IFGPIWNR.D	10.097	4	0.99322	1	1.14533	1.65039e-11
IFGSYDPR	CATG_HUMAN	P08311	R.IFGSYDPR.R	29.412	10	0.99346	1	0.818807	7.8125e-12
IFIHSLDV	SPLC2_HUMAN	Q96DR5	R.IFIHSLDV.N	49.799	15	0.99249	1	0.863538	3.125e-11
IFRDGEEAGAYDGPR	PDIA3_HUMAN	P30101	K.IFRDGEEAGAYDGPR.T	16.832	6	0.99301	1	0.797332	1.01554e-13
IFTPLLHQIELEKPKPIPYIYGSR	G6PD_HUMAN	P11413	R.IFTPLLHQIELEKPKPIPYIYGSR.G	10.097	4	0.96731	1	1.34714	5.02452e-14
IFVDIEKLPWSK	PYGL_HUMAN	P06737	R.IFVDIEKLPWSK.A	6.139	4	0.9503	1	1.55432	6.33144e-11
IGAEVYHNLK	ENOA_HUMAN	Q6GMP2	R.IGAEVYHNLK.N	64.977	24	0.99296	1	0.144231	3.90625e-14
IGDEDVGR	PPIB_HUMAN	P23284	R.IGDEDVGR.V	36.111	7	0.99224	1	0.625434	7.8125e-12
IGEHTPSALAIMENANVLAR	ALDOA_HUMAN	P04075	K.IGEHTPSALAIMENANVLAR.Y	34.341	13	0.99396	1	0.532883	3.05176e-26
IGFPWSEIR	EZRI_HUMAN	P15311	K.IGFPWSEIR.N	26.28	13	0.9935	1	1.01579	8.59375e-13
IGFPWSEIR	MOES_HUMAN	P26038	K.IGFPWSEIR.N	15.598	8	0.9935	1	1.01579	8.59375e-13
IGFPWSEIR	RADI_HUMAN	P35241	K.IGFPWSEIR.N	6.69	4	0.9935	1	1.01579	8.59375e-13
IGGIGTVPVGR	EF1A1_HUMAN	P68104	K.IGGIGTVPVGR.V	36.58	16	0.99427	1	0.620045	1.95313e-15
IGGIGTVPVGR	EF1A2_HUMAN	Q05639	K.IGGIGTVPVGR.V	18.79	9	0.99427	1	0.620045	1.95313e-15
IGGIGTVPVGR	EF1A3_HUMAN	Q5VTE0	K.IGGIGTVPVGR.V	36.58	16	0.99427	1	0.620045	1.95313e-15
IGGILANELSVDEAALHAAVIAINEAIDR	IQGA1_HUMAN	P46940	K.IGGILANELSVDEAALHAAVIAINEAIDR.R	8.69	9	0.99282	1	1.32733	5.73063e-25
IGHPAPNFK	PRDX1_HUMAN	Q06830	K.IGHPAPNFK.A	48.744	12	0.99264	1	0.915138	9.96094e-13
IGLDLPALNMQR	PERM_HUMAN	P05164	R.IGLDLPALNMQR.S	29.396	23	0.99364	1	0.59736	1.23047e-15
IGLFGGAGVGK	ATPB_HUMAN	P06576	K.IGLFGGAGVGK.T	30.435	10	0.99298	1	0.979729	3.90625e-15
IGLVRPGTALELLEAQAATGFIVDPV	DESP_HUMAN	P15924	K.IGLVRPGTALELLEAQAATGFIVDPV.S	49.739	138	0.98252	1	1.20367	1.99163e-15
IGLVRPGTALELLEAQAATGFIVDPVSNLR	DESP_HUMAN	P15924	K.IGLVRPGTALELLEAQAATGFIVDPVSNLR.L	49.739	138	0.97128	1	0.228673	3.59782e-19
IGMIDMFHK	S10A7_HUMAN	P31151	I.IGMIDMFHK.Y	49.505	9	0.99183	1	1.2129	2.34375e-11
IGMIDMFHK	S1A7A_HUMAN	Q86SG5	I.IGMIDMFHK.Y	10.891	2	0.99183	1	1.2129	2.34375e-11
IGMIGWNFGQFEEDILSI	TGM3_HUMAN	Q08188	R.IGMIGWNFGQFEEDILSI.C	58.297	45	0.99422	1	0.510349	8.78757e-14
IGNFSTDIKDSK	PLSL_HUMAN	P13796	K.IGNFSTDIKDSK.A	25.359	10	0.9931	1	1.53249	9.42212e-15
IGYNPDTVAFVPI	EF1A1_HUMAN	P68104	K.IGYNPDTVAFVPI.S	36.58	16	0.97079	1	0.903947	3.21367e-11
IGYNPDTVAFVPI	EF1A3_HUMAN	Q5VTE0	K.IGYNPDTVAFVPI.S	36.58	16	0.97079	1	0.903947	3.21367e-11
IHFPLATYAPVISAEK	TBA1A_HUMAN	Q71U36	R.IHFPLATYAPVISAEK.A	37.694	14	0.99238	1	1.06768	3.73302e-16
IHFPLATYAPVISAEK	TBA1B_HUMAN	P68363	R.IHFPLATYAPVISAEK.A	40.798	15	0.99238	1	1.06768	3.73302e-16
IHFPLATYAPVISAEK	TBA1C_HUMAN	Q9BQE3	R.IHFPLATYAPVISAEK.A	40.98	15	0.99238	1	1.06768	3.73302e-16
IHFPLATYAPVISAEK	TBA3C_HUMAN	Q13748	R.IHFPLATYAPVISAEK.A	32.444	12	0.99238	1	1.06768	3.73302e-16
IHFPLATYAPVISAEK	TBA3E_HUMAN	Q6PEY2	R.IHFPLATYAPVISAEK.A	26.222	9	0.99238	1	1.06768	3.73302e-16
IHFPLATYAPVISAEK	TBA4A_HUMAN	P68366	R.IHFPLATYAPVISAEK.A	34.598	13	0.99238	1	1.06768	3.73302e-16
IHGFDLAAINTQR	PERL_HUMAN	P22079	R.IHGFDLAAINTQR.C	32.865	16	0.99379	1	0.841374	2.92969e-17
IHLISTQSAIPYALR	FIBG_HUMAN	Q9UC63	K.IHLISTQSAIPYALR.V	20.971	7	0.994	1	1.38095	6.49306e-18
IHVLPIDDTVEGITGNLFEV	TERA_HUMAN	P55072	R.IHVLPIDDTVEGITGNLFEV.Y	12.655	8	0.99365	1	1.47596	1.43676e-15
IIAATIENAQPI	K1C16_HUMAN	P08779	K.IIAATIENAQPI.L	72.304	50	0.99374	1	0.775443	1.16213e-11
IIAATIENAQPILQIDNAR	K1C16_HUMAN	P08779	K.IIAATIENAQPILQIDNAR.L	72.304	50	0.99328	1	0.601366	1.24489e-23
IIALDGDTK	TKT_HUMAN	P29401	R.IIALDGDTK.N	30.337	13	0.99344	1	0.664254	1.5625e-12
IIAPPERK	ACTA_HUMAN	P62736	K.IIAPPERK.Y	46.154	28	0.99299	1	0.42794	1.5625e-11
IIAPPERK	ACTBL_HUMAN	Q562R1	K.IIAPPERK.Y	28.457	15	0.99299	1	0.42794	1.5625e-11
IIAPPERK	ACTB_HUMAN	Q96HG5	K.IIAPPERK.Y	80.8	48	0.99299	1	0.42794	1.5625e-11
IIAPPERK	ACTC_HUMAN	P68032	K.IIAPPERK.Y	48.806	32	0.99299	1	0.42794	1.5625e-11
IIAPPERK	ACTG_HUMAN	P63261	K.IIAPPERK.Y	80.8	48	0.99299	1	0.42794	1.5625e-11
IIAPPERK	ACTH_HUMAN	P63267	K.IIAPPERK.Y	46.277	28	0.99299	1	0.42794	1.5625e-11
IIAPPERK	ACTS_HUMAN	P68133	K.IIAPPERK.Y	45.093	30	0.99299	1	0.42794	1.5625e-11
IIEGGIYDADLNDER	CYTT_HUMAN	P09228	R.IIEGGIYDADLNDER.V	41.135	8	0.99232	1	0.135359	4.88281e-20
IIEIEDEAEKWQK	TRI29_HUMAN	Q14134	K.IIEIEDEAEKWQK.E	14.116	8	0.99362	1	1.05306	1.23721e-16
IIELPFQNK	SPB5_HUMAN	P36952	K.IIELPFQNK.H	29.067	8	0.99218	1	1.09856	3.20313e-12
IIIKNFDIPK	PIP_HUMAN	P12273	K.IIIKNFDIPK.S	52.74	9	0.99233	1	0.841608	7.98828e-13
IIMTAAAK	AL3A1_HUMAN	P30838	K.IIMTAAAK.H	30.243	11	0.98927	1	1.07404	1.5625e-11
IINEPTAAAIAYGLDKK	HSP72_HUMAN	P54652	R.IINEPTAAAIAYGLDKK.G	17.84	11	0.95187	1	0.888425	2.23356e-12
IINEPTAAAIAYGLDKK	HSP7C_HUMAN	P11142	R.IINEPTAAAIAYGLDKK.V	39.783	24	0.95187	1	0.888425	2.23356e-12
IINEPTAAAIAYGLDKR	GRP78_HUMAN	P11021	R.IINEPTAAAIAYGLDKR.E	25.994	13	0.99355	1	1.33835	4.43414e-15
IINEPTAAAIAYGLDR	HSP71_HUMAN	P08107	R.IINEPTAAAIAYGLDR.T	43.058	20	0.9932	1	0.720555	2.44141e-21
IINEPTAAAIAYGLDR	HSP76_HUMAN	P17066	R.IINEPTAAAIAYGLDR.R	12.442	7	0.9932	1	0.720555	2.44141e-21
IIPGGIYDADLNDEWVQR	CYTS_HUMAN	P01036	R.IIPGGIYDADLNDEWVQR.A	60.993	15	0.98008	1	0.358608	1.2207e-23
IIPGGIYNADLNDEWVQR	CYTN_HUMAN	P01037	R.IIPGGIYNADLNDEWVQR.A	62.411	13	0.99207	1	0.677113	1.2207e-23
IIQLLDDYPK	RLA0L_HUMAN	Q8NHW5	K.IIQLLDDYPK.C	17.35	5	0.99404	1	1.23912	3.125e-13
IIQLLDDYPK	RLA0_HUMAN	P05388	K.IIQLLDDYPK.C	17.35	5	0.99404	1	1.23912	3.125e-13
IIRQEPSDSPMFIINR	DSG1_HUMAN	Q02413	K.IIRQEPSDSPMFIINR.N	15.253	10	0.99274	1	1.48371	1.46061e-14
IISTTTLNK	K2C4_HUMAN	P19013	K.IISTTTLNK.R	74.532	75	0.99318	1	0.847838	1.5625e-12
IISTTTLNKR	K2C4_HUMAN	P19013	K.IISTTTLNKR.R	74.532	75	0.99281	1	1.21858	1.5625e-13
IITLTGPTNAIFK	PCBP1_HUMAN	Q15365	R.IITLTGPTNAIFK.A	12.36	2	0.99323	1	0.740809	8.65357e-16
IIVDELKQEVISTSSK	GBLP_HUMAN	P63244	K.IIVDELKQEVISTSSK.A	18.927	4	0.99316	1	0.795419	3.71678e-20
IKDAFDRNPELQNLLLDDFFK	6PGD_HUMAN	P52209	K.IKDAFDRNPELQNLLLDDFFK.S	41.615	17	0.99342	1	1.16954	9.7408e-20
IKDLFPDGSISSSTK	SPB13_HUMAN	Q9UIV8	K.IKDLFPDGSISSSTK.L	19.437	5	0.99359	1	0.890499	1.60525e-17
IKDPDASKPEDWDER	CALR_HUMAN	P27797	K.IKDPDASKPEDWDER.A	16.067	4	0.9926	1	1.0611	7.2979e-17
IKIIAPPER	ACTA_HUMAN	P62736	K.IKIIAPPER.K	46.154	28	0.92994	1	0.920007	1.32813e-11
IKIIAPPER	ACTBL_HUMAN	Q562R1	K.IKIIAPPER.K	28.457	15	0.92994	1	0.920007	1.32813e-11
IKIIAPPER	ACTB_HUMAN	Q96HG5	K.IKIIAPPER.K	80.8	48	0.92994	1	0.920007	1.32813e-11
IKIIAPPER	ACTC_HUMAN	P68032	K.IKIIAPPER.K	48.806	32	0.92994	1	0.920007	1.32813e-11
IKIIAPPER	ACTG_HUMAN	P63261	K.IKIIAPPER.K	80.8	48	0.92994	1	0.920007	1.32813e-11
IKIIAPPER	ACTH_HUMAN	P63267	K.IKIIAPPER.K	46.277	28	0.92994	1	0.920007	1.32813e-11
IKIIAPPER	ACTS_HUMAN	P68133	K.IKIIAPPER.K	45.093	30	0.92994	1	0.920007	1.32813e-11
IKIIAPPERK	ACTA_HUMAN	P62736	K.IKIIAPPERK.Y	46.154	28	0.99005	1	1.21101	1.41717e-11
IKIIAPPERK	ACTBL_HUMAN	Q562R1	K.IKIIAPPERK.Y	28.457	15	0.99005	1	1.21101	1.41717e-11
IKIIAPPERK	ACTB_HUMAN	Q96HG5	K.IKIIAPPERK.Y	80.8	48	0.99005	1	1.21101	1.41717e-11
IKIIAPPERK	ACTC_HUMAN	P68032	K.IKIIAPPERK.Y	48.806	32	0.99005	1	1.21101	1.41717e-11
IKIIAPPERK	ACTG_HUMAN	P63261	K.IKIIAPPERK.Y	80.8	48	0.99005	1	1.21101	1.41717e-11
IKIIAPPERK	ACTH_HUMAN	P63267	K.IKIIAPPERK.Y	46.277	28	0.99005	1	1.21101	1.41717e-11
IKIIAPPERK	ACTS_HUMAN	P68133	K.IKIIAPPERK.Y	45.093	30	0.99005	1	1.21101	1.41717e-11
IKIPDYSDSFK	BPI_HUMAN	Q9H203	R.IKIPDYSDSFK.I	10.062	4	0.99331	1	1.08724	1.57227e-14
IKNDLNLKK	DESP_HUMAN	P15924	K.IKNDLNLKK.S	49.739	138	0.91668	1	0.960577	9.46143e-12
IKPHLMSQELPEDWDKQPVK	PDIA1_HUMAN	P07237	K.IKPHLMSQELPEDWDKQPVK.V	48.819	20	0.99298	1	0.52684	1.32186e-17
IKSDYAQLLEDMQNAFR	VATA_HUMAN	P38606	K.IKSDYAQLLEDMQNAFR.S	9.076	2	0.99326	1	1.34386	5.18886e-14
IKVLEQDKAR	DESP_HUMAN	P15924	K.IKVLEQDKAR.L	49.739	138	0.99194	1	0.82706	3.125e-13
IKWGDAGAEYVVESTGVFTTMEK	G3P_HUMAN	P04406	K.IKWGDAGAEYVVESTGVFTTMEK.A	65.97	33	0.99394	1	0.80196	4.38151e-23
ILATPPQEDAPSVDIANIR	TKT_HUMAN	P29401	K.ILATPPQEDAPSVDIANIR.M	30.337	13	0.99331	1	0.50984	7.6294e-25
ILDSNEPCGGQKG	A2ML1_HUMAN	A8K2U0	K.ILDSNEPCGGQKG.F	27.854	29	0.99357	1	0.906424	1.34231e-11
ILDSVGIEADDDRLNK	RLA2_HUMAN	P05387	K.ILDSVGIEADDDRLNK.V	47.826	4	0.99412	1	1.29105	6.11779e-20
ILDSVGIEADDDRLNKVISELNGK	RLA2_HUMAN	P05387	K.ILDSVGIEADDDRLNKVISELNGK.N	47.826	4	0.94228	1	1.25798	2.56571e-14
ILDWHVANTDKK	TALDO_HUMAN	P37837	R.ILDWHVANTDKK.S	24.926	8	0.99352	1	0.851082	7.4704e-14
ILEFFGLK	PDIA1_HUMAN	P07237	R.ILEFFGLK.K	48.819	20	0.99299	1	1.04126	3.125e-11
ILFIFIDSDHTDNQR	PDIA1_HUMAN	P07237	K.ILFIFIDSDHTDNQR.I	48.819	20	0.99296	1	1.01456	8.2886e-17
ILGADTSVDLEETGR	ATPA_HUMAN	P25705	R.ILGADTSVDLEETGR.V	20.253	7	0.99297	1	0.46597	2.44141e-20
ILGGHLDAK	HPTR_HUMAN	P00739	R.ILGGHLDAK.G	8.621	4	0.99209	1	1.28062	1.5625e-12
ILGGHLDAK	HPT_HUMAN	P00738	R.ILGGHLDAK.G	18.966	10	0.99209	1	1.28062	1.5625e-12
ILGGTEAEEGSWPWQVSLR	TM11D_HUMAN	O60235	R.ILGGTEAEEGSWPWQVSLR.L	6.699	2	0.99334	1	1.26994	5.01294e-19
ILGIPYKNNDLSMFVLLPNDIDGLEK	SPB13_HUMAN	Q9UIV8	K.ILGIPYKNNDLSMFVLLPNDIDGLEK.I	19.437	5	0.99284	1	1.11225	2.32688e-12
ILGLLDAYLK	EF1G_HUMAN	P26641	R.ILGLLDAYLK.T	10.755	4	0.99208	1	1.74666	2.65625e-12
ILGQNGISDLVK	LDHA_HUMAN	P00338	C.ILGQNGISDLVK.V	29.217	10	0.99358	1	0.878385	7.8125e-15
ILLAELEQLK	VIME_HUMAN	Q96ML2	K.ILLAELEQLK.G	28.112	13	0.99393	1	0.708476	6.25e-13
ILLAELEQLKGQGK	VIME_HUMAN	Q96ML2	K.ILLAELEQLKGQGK.S	28.112	13	0.99207	1	0.897522	2.34375e-17
ILLANFLAQTEALMR	G6PI_HUMAN	P06744	K.ILLANFLAQTEALMR.G	38.351	14	0.99275	1	1.41913	1.95313e-19
ILLNPQDK	PIGR_HUMAN	P01833	R.ILLNPQDK.D	27.88	25	0.99305	1	0.831365	6.25e-11
ILLNPQDKDGSFSVVI	PIGR_HUMAN	P01833	R.ILLNPQDKDGSFSVVI.T	27.88	25	0.99325	1	0.312855	1.30255e-15
ILLNPQDKDGSFSVVITGLR	PIGR_HUMAN	P01833	R.ILLNPQDKDGSFSVVITGLR.K	27.88	25	0.99177	1	0.135594	1.35453e-21
ILLNPQDKDGSFSVVITGLRK	PIGR_HUMAN	P01833	R.ILLNPQDKDGSFSVVITGLRK.E	27.88	25	0.99212	1	1.07642	1.97968e-21
ILLPDDIEDESTGLK	ILEU_HUMAN	P30740	V.ILLPDDIEDESTGLK.K	59.367	17	0.99194	1	0.438544	1.22056e-15
ILLTEPPMNPTK	ARP2_HUMAN	P61160	K.ILLTEPPMNPTK.N	15.99	5	0.99249	1	0.869718	1.16718e-12
ILNEMRDQYEK	K1C14_HUMAN	P02533	R.ILNEMRDQYEK.M	60.593	45	0.99326	1	0.894767	4.86369e-14
ILNEMRDQYEK	K1C17_HUMAN	Q8N1P6	R.ILNEMRDQYEK.M	60.648	30	0.99326	1	0.894767	4.86369e-14
ILNEMRDQYEQMAEK	K1C16_HUMAN	P08779	R.ILNEMRDQYEQMAEK.N	72.304	50	0.99325	1	0.507415	3.99412e-16
ILNVGDIGGNETVTLR	TGM1_HUMAN	P22735	K.ILNVGDIGGNETVTLR.Q	26.683	16	0.99329	1	0.0743158	2.44141e-21
ILNVHVPR	BPIL1_HUMAN	Q8N4F0	R.ILNVHVPR.L	41.266	14	0.99388	1	0.525476	1.5625e-11
ILQHKDELNADHPFIYIIR	SPB5_HUMAN	P36952	R.ILQHKDELNADHPFIYIIR.H	29.067	8	0.99311	1	0.801971	5.46786e-16
ILTATIENNR	K1C13_HUMAN	P13646	K.ILTATIENNR.V	69.869	59	0.99368	1	0.153022	7.8125e-14
ILTATIENNRV	K1C13_HUMAN	P13646	K.ILTATIENNRV.I	69.869	59	0.99249	1	0.499962	8.03778e-15
ILTATIENNRVILEIDNAR	K1C13_HUMAN	P13646	K.ILTATIENNRVILEIDNAR.L	69.869	59	0.99325	1	0.187754	2.84127e-21
ILTATVDNANILLQIDNAR	K1C17_HUMAN	Q8N1P6	K.ILTATVDNANILLQIDNAR.L	60.648	30	0.99329	1	1.00656	6.65148e-18
ILTATVDNANVLLQIDNAR	K1C14_HUMAN	P02533	K.ILTATVDNANVLLQIDNAR.L	60.593	45	0.99401	1	0.694067	8.81917e-20
ILTQDTPEFFIDQGHAK	LPLC1_HUMAN	Q9H4V6	K.ILTQDTPEFFIDQGHAK.V	45.041	20	0.99347	1	0.535433	2.44141e-22
ILTSVDQYLELIGNSLPGTTAK	NIBL1_HUMAN	Q96TA1	K.ILTSVDQYLELIGNSLPGTTAK.S	12.824	6	0.99355	1	1.3333	1.75372e-14
ILTTGFSR	COR1A_HUMAN	P31146	K.ILTTGFSR.M	31.67	9	0.80191	1	0.68618	1.5625e-11
ILVNQLSVDDVNVLTCATGTLSNLTCNNSKN	PLAK_HUMAN	P14923	K.ILVNQLSVDDVNVLTCATGTLSNLTCNNSKN.K	42.55	30	0.95251	1	-0.228099	1.0159e-12
ILVVNAAYFVGK	SPB5_HUMAN	P36952	K.ILVVNAAYFVGK.W	29.067	8	0.99313	1	0.618063	9.76563e-17
IMDPNIVGSEHYDVAR	ATPB_HUMAN	P06576	R.IMDPNIVGSEHYDVAR.G	30.435	10	0.99425	1	0.920345	3.58974e-11
IMGIPEEEQMGLLR	MYH9_HUMAN	P35579	R.IMGIPEEEQMGLLR.V	15.357	24	0.99316	1	1.42642	3.50359e-15
IMNTFSVMPSPK	TBB2A_HUMAN	Q13885	R.IMNTFSVMPSPK.V	42.247	18	0.99321	1	1.54279	1.12821e-13
IMNTFSVVPSPK	TBB3_HUMAN	Q13509	R.IMNTFSVVPSPK.V	26.889	12	0.99405	1	0.767804	4.88281e-17
IMNTFSVVPSPK	TBB5_HUMAN	P07437	R.IMNTFSVVPSPK.V	40.09	16	0.99405	1	0.767804	4.88281e-17
IMSLVDPNHSGLVTFQAFIDFMSR	ACTN4_HUMAN	O43707	R.IMSLVDPNHSGLVTFQAFIDFMSR.E	42.371	27	0.99325	1	0.730562	3.83231e-19
INGIPQQHTQVLFIAK	CEAM5_HUMAN	P06731	R.INGIPQQHTQVLFIAK.I	3.561	2	0.99314	1	1.02264	3.73876e-18
INKLHSEGDQLLAAEHPGR	PEPL_HUMAN	O60437	R.INKLHSEGDQLLAAEHPGR.N	32.517	52	0.99303	1	0.929669	1.82119e-18
INLGFSNLK	DMBT1_HUMAN	Q9Y4V9	R.INLGFSNLK.L	14.463	9	0.99301	1	0.934135	1.5625e-12
INNFSADIKDSK	PLST_HUMAN	P13797	K.INNFSADIKDSK.A	16.984	8	0.99116	1	1.16912	3.18359e-15
INSWVESQTNEK	SPB3_HUMAN	Q8IXI3	K.INSWVESQTNEK.I	42.821	15	0.99303	1	0.542381	1.02783e-16
INSWVESQTNEK	SPB4_HUMAN	P48594	K.INSWVESQTNEK.I	27.179	10	0.99303	1	0.542381	1.02783e-16
INVYYNEAAGNKYVPR	TBB2A_HUMAN	Q13885	R.INVYYNEAAGNKYVPR.A	42.247	18	0.99294	1	1.16421	2.28144e-21
IPDWFLNR	RS18_HUMAN	P62269	K.IPDWFLNR.Q	11.184	2	0.99304	1	1.30121	1.5625e-11
IPIEDGSGEVVLSR	CO3_HUMAN	P01024	R.IPIEDGSGEVVLSR.K	20.204	22	0.99425	1	1.16596	4.88281e-19
IPIQQALLSGMISEELAQLLQDESSYEKDLTDPISK	EVPL_HUMAN	Q92817	R.IPIQQALLSGMISEELAQLLQDESSYEKDLTDPISK.E	19.97	31	0.99237	1	0.467786	4.82908e-26
IPPPPPAPY	SMR3B_HUMAN	P02814	R.IPPPPPAPY.G	67.089	19	0.99406	1	0.611391	3.90625e-13
IPPPPPAPYGP	SMR3B_HUMAN	P02814	R.IPPPPPAPYGP.G	67.089	19	0.99338	1	0.903334	1.01539e-13
IPPPPPAPYGPGIFPPPPP	SMR3B_HUMAN	P02814	R.IPPPPPAPYGPGIFPPPPP.Q	67.089	19	0.99137	1	1.27131	1.11484e-16
IPPPPPAPYGPGIFPPPPPQ	SMR3B_HUMAN	P02814	R.IPPPPPAPYGPGIFPPPPPQ.P	67.089	19	0.99271	1	0.830035	1.96363e-11
IPPPPPAPYGPGIFPPPPPQP	SMR3B_HUMAN	P02814	R.IPPPPPAPYGPGIFPPPPPQP.-	67.089	19	0.99354	1	0.313414	1.24249e-13
IQASTMAFK	TAGL2_HUMAN	P37802	K.IQASTMAFK.Q	39.698	7	0.97417	1	0.878343	7.07031e-11
IQEAGTEVVK	MDHM_HUMAN	P40926	R.IQEAGTEVVK.A	27.219	7	0.93105	1	1.41855	7.03125e-13
IQLMNSGIGWFQPDVLK	LPLC1_HUMAN	Q9H4V6	R.IQLMNSGIGWFQPDVLK.N	45.041	20	0.99308	1	0.842925	2.53906e-21
IQLVEEELDR	TPM1_HUMAN	Q96IK2	R.IQLVEEELDR.A	4.93	2	0.99376	1	1.70789	1.5625e-13
IQLVEEELDR	TPM2_HUMAN	P07951	R.IQLVEEELDR.A	8.803	3	0.99376	1	1.70789	1.5625e-13
IQLVEEELDR	TPM3_HUMAN	P06753	R.IQLVEEELDR.A	10.211	4	0.99376	1	1.70789	1.5625e-13
IQLVEEELDR	TPM4_HUMAN	Q9UCS3	R.IQLVEEELDR.A	16.129	5	0.99376	1	1.70789	1.5625e-13
IQLVEEELDRAQER	TPM1_HUMAN	Q96IK2	R.IQLVEEELDRAQER.L	4.93	2	0.99285	1	0.602183	1.17115e-13
IQLVEEELDRAQER	TPM2_HUMAN	P07951	R.IQLVEEELDRAQER.L	8.803	3	0.99285	1	0.602183	1.17115e-13
IQLVEEELDRAQER	TPM3_HUMAN	P06753	R.IQLVEEELDRAQER.L	10.211	4	0.99285	1	0.602183	1.17115e-13
IQLVEEELDRAQER	TPM4_HUMAN	Q9UCS3	R.IQLVEEELDRAQER.L	16.129	5	0.99285	1	0.602183	1.17115e-13
IQQVVDNPQHK	SPLC2_HUMAN	Q96DR5	V.IQQVVDNPQHK.T	49.799	15	0.9935	1	0.835528	1.89746e-13
IQSQFTDAQK	DESP_HUMAN	P15924	K.IQSQFTDAQK.H	49.739	138	0.99321	1	1.18412	1.5625e-13
IQVLVEPDHFK	LEG3_HUMAN	P17931	K.IQVLVEPDHFK.V	19.6	4	0.99366	1	0.758545	3.327e-13
IQVWHEEHR	MOES_HUMAN	P26038	R.IQVWHEEHR.G	15.598	8	0.99341	1	1.31445	7.8125e-13
IREEYPDR	TBB1_HUMAN	Q9H4B7	K.IREEYPDR.I	6.43	4	0.99371	1	0.835466	9.32246e-11
IREEYPDR	TBB2A_HUMAN	Q13885	K.IREEYPDR.I	42.247	18	0.99371	1	0.835466	9.32246e-11
IREEYPDR	TBB5_HUMAN	P07437	K.IREEYPDR.I	40.09	16	0.99371	1	0.835466	9.32246e-11
IREEYPDR	TBB8B_HUMAN	A6NNZ2	K.IREEYPDR.I	9.685	5	0.99371	1	0.835466	9.32246e-11
IREEYPDR	TBB8_HUMAN	Q3ZCM7	K.IREEYPDR.I	13.063	6	0.99371	1	0.835466	9.32246e-11
IREEYPDR	YI016_HUMAN	A6NKZ8	K.IREEYPDR.I	11.559	5	0.99371	1	0.835466	9.32246e-11
IRGLVPPNASR	LEG7_HUMAN	P47929	R.IRGLVPPNASR.F	56.618	11	0.99308	1	0.115976	1.08373e-11
IRIDSLSAQLSQLQK	LMNA_HUMAN	P02545	R.IRIDSLSAQLSQLQK.Q	24.096	14	0.99344	1	1.2324	4.71007e-16
IRLENEIQTYR	K1C10_HUMAN	P13645	K.IRLENEIQTYR.S	52.74	27	0.99324	1	0.875319	1.58203e-14
ISAPNVDFNLEGPK	AHNK_HUMAN	Q09666	R.ISAPNVDFNLEGPK.V	19.508	36	0.99169	1	0.143423	3.49724e-17
ISDTSVVLSMDNNR	K2C3_HUMAN	P12035	H.ISDTSVVLSMDNNR.S	32.006	23	0.99252	1	0.281595	2.33154e-17
ISDTSVVLSMDNNR	K2C6A_HUMAN	P02538	H.ISDTSVVLSMDNNR.N	70.035	77	0.99252	1	0.281595	2.33154e-17
ISDTSVVLSMDNNR	K2C6B_HUMAN	P04259	H.ISDTSVVLSMDNNR.N	68.44	73	0.99252	1	0.281595	2.33154e-17
ISDTSVVLSMDNNR	K2C6C_HUMAN	P48668	H.ISDTSVVLSMDNNR.N	67.553	75	0.99252	1	0.281595	2.33154e-17
ISEDKNPDYR	PLAK_HUMAN	P14923	R.ISEDKNPDYR.K	42.55	30	0.99406	1	0.282054	8.2666e-14
ISEDKNPDYRK	PLAK_HUMAN	P14923	R.ISEDKNPDYRK.R	42.55	30	0.99155	1	0.235394	1.25349e-12
ISEQFTAMFR	TBB2A_HUMAN	Q13885	R.ISEQFTAMFR.R	42.247	18	0.99156	1	0.791801	3.90625e-14
ISEQFTAMFR	TBB3_HUMAN	Q13509	R.ISEQFTAMFR.R	26.889	12	0.99156	1	0.791801	3.90625e-14
ISEQFTAMFR	TBB5_HUMAN	P07437	R.ISEQFTAMFR.R	40.09	16	0.99156	1	0.791801	3.90625e-14
ISFDEYWTLIGGITGPIAK	S10AG_HUMAN	Q96FQ6	R.ISFDEYWTLIGGITGPIAK.L	67.961	9	0.99301	1	0.76141	2.96893e-18
ISGLIYEETR	H4_HUMAN	P62805	R.ISGLIYEETR.G	52.427	12	0.99417	1	0.792124	7.8125e-14
ISGVGIDQPPYGIFVINQK	DSG1_HUMAN	Q02413	R.ISGVGIDQPPYGIFVINQK.T	15.253	10	0.99325	1	0.297148	8.31138e-20
ISGWTQALPDMVVSHLFGK	NDRG1_HUMAN	Q92597	K.ISGWTQALPDMVVSHLFGK.E	8.883	2	0.99291	1	1.52877	2.2686e-12
ISISTSGGSFR	K2C5_HUMAN	P13647	R.ISISTSGGSFR.N	65.932	71	0.99399	1	0.573041	1.95313e-15
ISITEGIER	DESP_HUMAN	P15924	K.ISITEGIER.G	49.739	138	0.99324	1	0.791107	1.5625e-12
ISLPLPNFSSLNLR	VIME_HUMAN	Q96ML2	R.ISLPLPNFSSLNLR.E	28.112	13	0.99082	1	1.02396	4.20559e-13
ISMPDFDLHLK	AHNK_HUMAN	Q09666	K.ISMPDFDLHLK.G	19.508	36	0.99299	1	1.03988	2.02742e-14
ISMPDFDLHLKGPK	AHNK_HUMAN	Q09666	K.ISMPDFDLHLKGPK.V	19.508	36	0.99343	1	1.29726	4.78652e-16
ISMPDIDLNLTGPK	AHNK_HUMAN	Q09666	K.ISMPDIDLNLTGPK.I	19.508	36	0.99346	1	0.755229	2.96244e-16
ISMPDLDLNLKGPK	AHNK_HUMAN	Q09666	K.ISMPDLDLNLKGPK.M	19.508	36	0.95371	0.746036	0.935491	6.67041e-16
ISMPDVDLHLK	AHNK_HUMAN	Q09666	K.ISMPDVDLHLK.G	19.508	36	0.99304	1	1.23087	5.9082e-15
ISMPDVDLHLKGPK	AHNK_HUMAN	Q09666	K.ISMPDVDLHLKGPK.V	19.508	36	0.99316	1	1.05208	2.88086e-17
ISMPDVDLNLKGPK	AHNK_HUMAN	Q09666	K.ISMPDVDLNLKGPK.L	19.508	36	0.9382	1	0.987536	2.53378e-12
ISMPGFKGEGPEVDVNLPK	AHNK_HUMAN	Q09666	K.ISMPGFKGEGPEVDVNLPK.A	19.508	36	0.96929	1	0.861689	1.36568e-11
ISMQDVDLSLGSPK	AHNK_HUMAN	Q09666	K.ISMQDVDLSLGSPK.L	19.508	36	0.99292	1	0.575046	1.40456e-18
ISMSEVDLNVAAPK	AHNK_HUMAN	Q09666	R.ISMSEVDLNVAAPK.V	19.508	36	0.99163	1	0.33142	1.56979e-14
ISNRPAFMPSEGK	ACTN2_HUMAN	P35609	R.ISNRPAFMPSEGK.M	5.369	4	0.99338	0.993091	0.46911	1.74746e-12
ISNSLILDVK	SPLC2_HUMAN	Q96DR5	K.ISNSLILDVK.A	49.799	15	0.9941	1	0.611733	1.5625e-13
ISNVFTFAFR	PERL_HUMAN	P22079	R.ISNVFTFAFR.F	32.865	16	0.99332	1	1.09909	1.95313e-14
ISPQIQLSGQTEQTQK	CRNN_HUMAN	Q9UBG3	R.ISPQIQLSGQTEQTQK.A	54.141	18	0.99033	1	-0.260011	3.90625e-20
ISQPVVVVAIVGLYR	GBP6_HUMAN	Q6ZN66	K.ISQPVVVVAIVGLYR.T	35.387	19	0.99309	1	1.33185	4.88281e-20
ISSDLDGHPVPK	TKT_HUMAN	P29401	K.ISSDLDGHPVPK.Q	30.337	13	0.99269	1	1.37088	7.09473e-15
ISSPTETER	S10AB_HUMAN	P31949	K.ISSPTETER.C	45.714	4	0.98487	1	0.694261	3.90625e-13
ISTEEAIR	DESP_HUMAN	P15924	R.ISTEEAIR.K	49.739	138	0.99389	1	1.43534	1.5625e-11
ISTISSVR	DESP_HUMAN	P15924	K.ISTISSVR.N	49.739	138	0.97892	1	1.3768	1.5625e-11
ISTSLPVLDLIDAIQPGSINYDLLK	PLSL_HUMAN	P13796	K.ISTSLPVLDLIDAIQPGSINYDLLK.T	25.359	10	0.99294	1	0.904435	2.98624e-21
ISTSLPVLDLIDAIQPGSINYDLLKTENLNDDEKLNNAK	PLSL_HUMAN	P13796	K.ISTSLPVLDLIDAIQPGSINYDLLKTENLNDDEKLNNAK.Y	25.359	10	0.99245	1	0.036916	5.1795e-17
ISYAQYEK	TGM3_HUMAN	Q08188	K.ISYAQYEK.Y	58.297	45	0.99307	1	0.852585	1.5625e-11
ISYKDAINR	DESP_HUMAN	P15924	K.ISYKDAINR.S	49.739	138	0.98833	1	0.969333	1.5625e-12
ITESEEVVSR	LMNA_HUMAN	P02545	R.ITESEEVVSR.E	24.096	14	0.99414	1	1.18947	1.95313e-14
ITITNDKGR	HS71L_HUMAN	P34931	K.ITITNDKGR.L	17.941	9	0.99253	1	0.461162	1.5625e-12
ITITNDKGR	HSP71_HUMAN	P08107	K.ITITNDKGR.L	43.058	20	0.99253	1	0.461162	1.5625e-12
ITITNDKGR	HSP72_HUMAN	P54652	K.ITITNDKGR.L	17.84	11	0.99253	1	0.461162	1.5625e-12
ITITNDKGR	HSP76_HUMAN	P17066	K.ITITNDKGR.L	12.442	7	0.99253	1	0.461162	1.5625e-12
ITITNDKGR	HSP7C_HUMAN	P11142	K.ITITNDKGR.L	39.783	24	0.99253	1	0.461162	1.5625e-12
ITITNDQNR	GRP78_HUMAN	P11021	K.ITITNDQNR.L	25.994	13	0.98622	1	0.960927	1.64063e-12
ITLDNAYMEK	KPYM_HUMAN	Q9BWB5	K.ITLDNAYMEK.C	49.153	22	0.99294	1	1.09655	7.8125e-14
ITLPVDFVTADKFDENAK	PGK1_HUMAN	P00558	K.ITLPVDFVTADKFDENAK.T	42.926	14	0.99329	1	1.04924	4.91333e-23
ITMQNLNDR	K1C13_HUMAN	P13646	K.ITMQNLNDR.L	69.869	59	0.9933	0.512469	0.275205	1.5625e-12
ITMQNLNDR	K1C15_HUMAN	P19012	K.ITMQNLNDR.L	27.412	19	0.9933	0.512469	0.275205	1.5625e-12
ITMQNLNDRLASYLEK	K1C13_HUMAN	P13646	K.ITMQNLNDRLASYLEK.V	69.869	59	0.99416	1	0.977789	6.68719e-18
ITNLTQQLEQASIVK	DESP_HUMAN	P15924	K.ITNLTQQLEQASIVK.K	49.739	138	0.99346	1	0.780148	1.42779e-17
ITNLTQQLEQASIVKK	DESP_HUMAN	P15924	K.ITNLTQQLEQASIVKK.R	49.739	138	0.99329	1	0.798718	3.88833e-16
ITPNLAEFAFSLYR	A1AT_HUMAN	Q86U18	K.ITPNLAEFAFSLYR.Q	39.952	14	0.9924	1	0.79294	4.88281e-19
ITPSYVAFTPEGER	GRP78_HUMAN	P11021	R.ITPSYVAFTPEGER.L	25.994	13	0.99203	1	0.415578	1.0985e-15
ITWLYDNTTGK	TGM3_HUMAN	Q08188	R.ITWLYDNTTGK.Q	58.297	45	0.99228	1	-0.077595	1.95313e-15
ITWLYDNTTGKQWK	TGM3_HUMAN	Q08188	R.ITWLYDNTTGKQWK.N	58.297	45	0.99327	1	1.33489	2.09238e-17
IVDDWANDGWGLKK	CALX_HUMAN	P27824	R.IVDDWANDGWGLKK.A	15.709	5	0.99263	1	1.0781	1.01978e-15
IVENIQVFDFK	AK1BA_HUMAN	O60218	R.IVENIQVFDFK.L	24.367	6	0.99319	1	1.75914	3.90625e-15
IVEPYIAWGYPNLK	RL7_HUMAN	P18124	R.IVEPYIAWGYPNLK.S	14.919	3	0.99409	1	0.270777	9.46227e-16
IVLQIDNAR	K1C18_HUMAN	P05783	R.IVLQIDNAR.L	7.442	2	0.99204	1	1.37825	3.125e-12
IVLQIDNAR	K1C19_HUMAN	Q9P1Y4	R.IVLQIDNAR.L	40	16	0.99204	1	1.37825	3.125e-12
IVLTGWRPGSGFTNTMR	KPYM_HUMAN	Q9BWB5	V.IVLTGWRPGSGFTNTMR.V	49.153	22	0.68746	1	0.731512	4.63596e-13
IVSGKDYNVTANSK	LDHA_HUMAN	P00338	K.IVSGKDYNVTANSK.L	29.217	10	0.99103	1	1.52371	2.44141e-19
IVSQLLTLMDGLK	TERA_HUMAN	P55072	R.IVSQLLTLMDGLK.Q	12.655	8	0.99025	1	1.12559	7.8125e-17
IVTMDSNFVPVNDKYSMVELQDPNSNR	A2ML1_HUMAN	A8K2U0	R.IVTMDSNFVPVNDKYSMVELQDPNSNR.I	27.854	29	0.993	1	0.296356	2.12523e-26
IWALEEENAK	PEPL_HUMAN	O60437	K.IWALEEENAK.V	32.517	52	0.99279	1	0.526632	4.72913e-12
IWHHTFYN	ACTBM_HUMAN	Q9BYX7	K.IWHHTFYN.E	24	15	0.94341	1	0.479349	8.20313e-12
IWHHTFYN	ACTB_HUMAN	Q96HG5	K.IWHHTFYN.E	80.8	48	0.94341	1	0.479349	8.20313e-12
IWHHTFYN	ACTC_HUMAN	P68032	K.IWHHTFYN.E	48.806	32	0.94341	1	0.479349	8.20313e-12
IWHHTFYN	ACTG_HUMAN	P63261	K.IWHHTFYN.E	80.8	48	0.94341	1	0.479349	8.20313e-12
IWHHTFYN	ACTS_HUMAN	P68133	K.IWHHTFYN.E	45.093	30	0.94341	1	0.479349	8.20313e-12
IWHHTFYN	POTEE_HUMAN	Q6S8J3	K.IWHHTFYN.E	12.186	18	0.94341	1	0.479349	8.20313e-12
IWHHTFYN	POTEF_HUMAN	A5A3E0	K.IWHHTFYN.E	10.512	17	0.94341	1	0.479349	8.20313e-12
IWHHTFYNELR	ACTBM_HUMAN	Q9BYX7	K.IWHHTFYNELR.V	24	15	0.99324	1	0.982874	1.95313e-15
IWHHTFYNELR	ACTB_HUMAN	Q96HG5	K.IWHHTFYNELR.V	80.8	48	0.99324	1	0.982874	1.95313e-15
IWHHTFYNELR	ACTC_HUMAN	P68032	K.IWHHTFYNELR.V	48.806	32	0.99324	1	0.982874	1.95313e-15
IWHHTFYNELR	ACTG_HUMAN	P63261	K.IWHHTFYNELR.V	80.8	48	0.99324	1	0.982874	1.95313e-15
IWHHTFYNELR	ACTS_HUMAN	P68133	K.IWHHTFYNELR.V	45.093	30	0.99324	1	0.982874	1.95313e-15
IWHHTFYNELR	POTEE_HUMAN	Q6S8J3	K.IWHHTFYNELR.V	12.186	18	0.99324	1	0.982874	1.95313e-15
IWHHTFYNELR	POTEF_HUMAN	A5A3E0	K.IWHHTFYNELR.V	10.512	17	0.99324	1	0.982874	1.95313e-15
IYDDDFFQNLDGVANALDNVDAR	UBA1_HUMAN	P22314	R.IYDDDFFQNLDGVANALDNVDAR.M	4.726	3	0.99308	1	1.28394	5.7426e-19
IYHLQLFEELRR	KPYM_HUMAN	Q9BWB5	A.IYHLQLFEELRR.L	49.153	22	0.99104	1	0.883356	1.25072e-13
IYIDSNNNPER	CLH1_HUMAN	Q00610	K.IYIDSNNNPER.F	10.627	13	0.99293	1	0.881057	2.83691e-15
IYNGTLVHEVWK	TGM3_HUMAN	Q08188	I.IYNGTLVHEVWK.D	58.297	45	0.99407	1	0.809869	1.37207e-15
IYTSPTWSAFVTDSSWSAR	LG3BP_HUMAN	Q08380	R.IYTSPTWSAFVTDSSWSAR.K	23.077	11	0.99282	1	0.38283	1.4935e-25
IYVDDGLISLQVK	KPYM_HUMAN	Q9BWB5	K.IYVDDGLISLQVK.Q	49.153	22	0.99336	1	0.566217	1.36719e-16
IYVSDDGK	AMY1_HUMAN	P04745	K.IYVSDDGK.A	65.362	60	0.99429	1	0.659349	7.8125e-12
IYVSDDGK	AMY2B_HUMAN	P19961	K.IYVSDDGK.A	53.816	42	0.99429	1	0.659349	7.8125e-12
IYVSDDGK	AMYP_HUMAN	P04746	K.IYVSDDGK.A	45.597	37	0.99429	1	0.659349	7.8125e-12
IYVSDDGKAHFSISNSAEDPFIAIHAESK	AMY1_HUMAN	P04745	K.IYVSDDGKAHFSISNSAEDPFIAIHAESK.L	65.362	60	0.99344	1	0.703857	1.44888e-29
IYVSDDGKAHFSISNSAEDPFIAIHAESK	AMY2B_HUMAN	P19961	K.IYVSDDGKAHFSISNSAEDPFIAIHAESK.L	53.816	42	0.99344	1	0.703857	1.44888e-29
IYVSDDGKAHFSISNSAEDPFIAIHAESK	AMYP_HUMAN	P04746	K.IYVSDDGKAHFSISNSAEDPFIAIHAESK.L	45.597	37	0.99344	1	0.703857	1.44888e-29
IYYGTEAQIGER	TGM1_HUMAN	P22735	R.IYYGTEAQIGER.T	26.683	16	0.99403	1	0.0172306	1.95313e-16
KAADKLIQNLDANHDGR	S10AG_HUMAN	Q96FQ6	R.KAADKLIQNLDANHDGR.I	67.961	9	0.99268	1	1.53373	5.88095e-17
KAAYLQETGKPLDETLKK	ANXA1_HUMAN	P04083	I.KAAYLQETGKPLDETLKK.A	67.052	42	0.99393	1	0.701533	2.17299e-18
KAGQAVDDFIEK	6PGD_HUMAN	P52209	V.KAGQAVDDFIEK.L	41.615	17	0.99323	1	0.552865	1.95313e-15
KAGTELVNFLSYFV	APOA2_HUMAN	P02652	K.KAGTELVNFLSYFV.E	25	2	0.99202	1	0.541897	2.88694e-11
KAGTQIENIDEDFRDGLK	ACTN4_HUMAN	O43707	R.KAGTQIENIDEDFRDGLK.L	42.371	27	0.99319	1	0.95258	6.82485e-18
KALTGHLEEVVLALLK	ANXA1_HUMAN	P04083	K.KALTGHLEEVVLALLK.T	67.052	42	0.99407	1	1.1747	4.46778e-19
KANLQIDQINTDLNLER	MYH9_HUMAN	P35579	K.KANLQIDQINTDLNLER.S	15.357	24	0.9679	1	0.562979	2.10551e-11
KAPSDLYQIILK	CAN1_HUMAN	P07384	R.KAPSDLYQIILK.A	16.807	9	0.99301	1	1.00814	1.3892e-13
KAQYEDIAQK	K2C1_HUMAN	P04264	V.KAQYEDIAQK.S	66.77	58	0.99287	1	0.583091	5.1732e-12
KAQYEEIANR	K2C5_HUMAN	P13647	V.KAQYEEIANR.S	65.932	71	0.99294	1	1.10428	7.8125e-13
KAQYEEIAQR	K22E_HUMAN	P35908	V.KAQYEEIAQR.S	40.845	30	0.99321	1	1.40333	1.5625e-12
KAQYEEIAQR	K2C6A_HUMAN	P02538	V.KAQYEEIAQR.S	70.035	77	0.99321	1	1.40333	1.5625e-12
KAQYEEIAQR	K2C6B_HUMAN	P04259	V.KAQYEEIAQR.S	68.44	73	0.99321	1	1.40333	1.5625e-12
KAQYEEIAQR	K2C6C_HUMAN	P48668	V.KAQYEEIAQR.S	67.553	75	0.99321	1	1.40333	1.5625e-12
KASGPPVSELITK	H12_HUMAN	P16403	R.KASGPPVSELITK.A	26.291	6	0.9914	1	1.12615	1.03223e-15
KASGPPVSELITK	H13_HUMAN	P16402	R.KASGPPVSELITK.A	25.339	6	0.9914	1	1.12615	1.03223e-15
KASGPPVSELITK	H14_HUMAN	P10412	R.KASGPPVSELITK.A	25.571	6	0.9914	1	1.12615	1.03223e-15
KAVETAAAHGSKPNVYANR	TGM1_HUMAN	P22735	R.KAVETAAAHGSKPNVYANR.G	26.683	16	0.99319	1	0.761411	6.63285e-23
KAYGQALAK	TKT_HUMAN	P29401	R.KAYGQALAK.L	30.337	13	0.99082	1	0.267886	1.5625e-12
KDAEEWFFTK	K1C14_HUMAN	P02533	R.KDAEEWFFTK.T	60.593	45	0.99407	1	0.972905	1.95313e-14
KDAEEWFFTKTEELNR	K1C14_HUMAN	P02533	R.KDAEEWFFTKTEELNR.E	60.593	45	0.9891	1	1.14223	1.15979e-18
KDDPVTNLNNAFEVAEK	ACTN4_HUMAN	O43707	R.KDDPVTNLNNAFEVAEK.Y	42.371	27	0.99321	1	1.36395	1.32752e-22
KDKNEDKKIDFSEFLSLLGDIATDYHK	S10A7_HUMAN	P31151	K.KDKNEDKKIDFSEFLSLLGDIATDYHK.Q	49.505	9	0.99218	1	1.15442	3.14308e-19
KDLQNFLKK	S10A9_HUMAN	P06702	R.KDLQNFLKK.E	90.351	13	0.98878	1	0.927816	6.25e-12
KDVDAAYLNKVELEAK	K2C4_HUMAN	P19013	K.KDVDAAYLNKVELEAK.V	74.532	75	0.99311	1	1.46474	2.44141e-21
KDVDAAYMNKVELQAK	K2C6A_HUMAN	P02538	K.KDVDAAYMNKVELQAK.A	70.035	77	0.99333	1	1.20482	2.81373e-21
KDVDAAYMNKVELQAK	K2C6B_HUMAN	P04259	K.KDVDAAYMNKVELQAK.A	68.44	73	0.99333	1	1.20482	2.81373e-21
KDVDAAYMNKVELQAK	K2C6C_HUMAN	P48668	K.KDVDAAYMNKVELQAK.A	67.553	75	0.99333	1	1.20482	2.81373e-21
KDVDAAYMNKVELQAK	K2C72_HUMAN	Q14CN4	K.KDVDAAYMNKVELQAK.V	6.458	7	0.99333	1	1.20482	2.81373e-21
KDVDGAYMTK	K2C1_HUMAN	P04264	K.KDVDGAYMTK.V	66.77	58	0.99322	1	0.696118	8.44727e-14
KEDLVFIFWAPESAPLK	COF1_HUMAN	P23528	K.KEDLVFIFWAPESAPLK.S	50	7	0.99206	1	1.09951	3.42948e-18
KEDLVFIFWAPESAPLK	COF2_HUMAN	Q9Y281	K.KEDLVFIFWAPESAPLK.S	18.675	4	0.99206	1	1.09951	3.42948e-18
KEGGLGPLNIPLLADVTR	PRDX2_HUMAN	P32119	R.KEGGLGPLNIPLLADVTR.R	25.253	5	0.99309	1	0.813829	6.95984e-21
KFDLDQLITHVLPFKK	ADH7_HUMAN	P40394	K.KFDLDQLITHVLPFKK.I	7.513	2	0.90651	1	1.12307	6.95931e-14
KFDLGQDVIDFTGHALALYR	GDIA_HUMAN	P31150	R.KFDLGQDVIDFTGHALALYR.T	10.962	4	0.99251	1	1.70733	9.33344e-23
KFDLGQDVIDFTGHALALYR	GDIB_HUMAN	P50395	K.KFDLGQDVIDFTGHALALYR.T	19.101	7	0.99251	1	1.70733	9.33344e-23
KFDQLLAEEK	MYH10_HUMAN	P35580	K.KFDQLLAEEK.S	1.063	2	0.99393	1	0.684462	1.64258e-13
KFDQLLAEEK	MYH11_HUMAN	P35749	R.KFDQLLAEEK.N	1.318	2	0.99393	1	0.684462	1.64258e-13
KFDQLLAEEK	MYH14_HUMAN	Q9H882	R.KFDQLLAEEK.A	1.303	2	0.99393	1	0.684462	1.64258e-13
KFDQLLAEEK	MYH9_HUMAN	P35579	K.KFDQLLAEEK.T	15.357	24	0.99393	1	0.684462	1.64258e-13
KFDVNTSAVQVLIEHIGNLDR	CLH1_HUMAN	Q00610	R.KFDVNTSAVQVLIEHIGNLDR.A	10.627	13	0.9939	1	1.31503	2.12368e-21
KFSIEEALQSGR	PEPL_HUMAN	O60437	K.KFSIEEALQSGR.L	32.517	52	0.99375	1	0.786458	8.39844e-16
KGGETSEMYLIQPDSSVKPYR	FIBB_HUMAN	P02675	R.KGGETSEMYLIQPDSSVKPYR.V	26.477	10	0.99332	1	1.05559	5.78397e-19
KGGSFQLNELQGLK	TRFL_HUMAN	Q8TCD2	K.KGGSFQLNELQGLK.S	34.085	34	0.99394	1	0.791069	2.14404e-17
KGNYAERV	H2A1C_HUMAN	Q93077	R.KGNYAERV.G	63.077	15	0.97729	1	0.356928	7.8125e-12
KGNYAERV	H2A1H_HUMAN	Q96KK5	R.KGNYAERV.G	64.062	15	0.97729	1	0.356928	7.8125e-12
[truncated: 2,859 more rows]

## Sheet: HIVnegative
Peptide	Protein	UniProt	PeptideEx	Percent_Coverage	PeptideCount	STAC_Score	Uniqueness_Probability	MassErrorPPM	MSGF_SpecProb
AADDTWEPFASGK	TTHY_HUMAN	P02766	K.AADDTWEPFASGK.T	43.537	3	0.99321	1	0.837678	1.46484e-18
AADKLGSTQIVK	LPLC1_HUMAN	Q9H4V6	K.AADKLGSTQIVK.I	45.041	20	0.99238	1	1.87884	3.90625e-16
AADKLIQNLDANHDGR	S10AG_HUMAN	Q96FQ6	K.AADKLIQNLDANHDGR.I	67.961	9	0.9926	1	1.19134	3.58598e-17
AADTDGDGQVNYEEFVR	CALL3_HUMAN	P27482	R.AADTDGDGQVNYEEFVR.V	43.624	4	0.99231	1	0.198747	6.3324e-22
AAEVYGTER	TRFL_HUMAN	Q8TCD2	V.AAEVYGTER.Q	34.085	34	0.99327	1	0.625256	1.95313e-12
AAFNSGK	G3P_HUMAN	P04406	R.AAFNSGK.V	65.97	33	0.98716	0.727499	1.93252	7.8125e-11
AAFNSGKVDIV	G3P_HUMAN	P04406	R.AAFNSGKVDIV.A	65.97	33	0.99323	1	0.846022	2.15332e-15
AAFNSGKVDIVAINDPFIDLNYMVYMFQYDSTHGK	G3P_HUMAN	P04406	R.AAFNSGKVDIVAINDPFIDLNYMVYMFQYDSTHGK.F	65.97	33	0.98893	1	0.80316	3.63244e-27
AAGVGEFEAGISK	EF1A1_HUMAN	P68104	V.AAGVGEFEAGISK.N	36.58	16	0.99295	1	1.3081	2.44141e-17
AAGVGEFEAGISK	EF1A2_HUMAN	Q05639	V.AAGVGEFEAGISK.N	18.79	9	0.99295	1	1.3081	2.44141e-17
AAGVGEFEAGISK	EF1A3_HUMAN	Q5VTE0	V.AAGVGEFEAGISK.N	36.58	16	0.99295	1	1.3081	2.44141e-17
AAIFDTENLEK	DESP_HUMAN	P15924	I.AAIFDTENLEK.I	49.739	138	0.98957	1	0.911478	1.44531e-13
AALEDTLAETEAR	K1C19_HUMAN	Q9P1Y4	K.AALEDTLAETEAR.F	40	16	0.99391	1	0.84728	4.88281e-18
AALSYVSEIGK	BPIL1_HUMAN	Q8N4F0	K.AALSYVSEIGK.A	41.266	14	0.99291	1	0.877963	1.95313e-15
AALSYVSEIGKAPLQR	BPIL1_HUMAN	Q8N4F0	K.AALSYVSEIGKAPLQR.A	41.266	14	0.99198	1	1.26714	2.60112e-20
AAMIVNQLSK	PLAK_HUMAN	P14923	K.AAMIVNQLSK.K	42.55	30	0.99301	1	1.00904	7.8125e-14
AAPEASGTPSSDAVSR	COR1A_HUMAN	P31146	R.AAPEASGTPSSDAVSR.L	31.67	9	0.99219	1	-0.0530732	1.63208e-18
AAPFNNWMESAMEDLQDMFIVHTIEEIEGLISAHDQFK	ACTN4_HUMAN	O43707	R.AAPFNNWMESAMEDLQDMFIVHTIEEIEGLISAHDQFK.S	42.371	27	0.99198	1	0.975844	1.77037e-23
AAPSVTLFPPSSEELQANK	LAC6_HUMAN	P0CF74	K.AAPSVTLFPPSSEELQANK.A	36.792	3	0.99196	1	0.147052	9.8329e-17
AAPSVTLFPPSSEELQANK	LAC7_HUMAN	A0M8Q6	K.AAPSVTLFPPSSEELQANK.A	36.792	3	0.99196	1	0.147052	9.8329e-17
AAQEEYVKR	ALDOA_HUMAN	P04075	K.AAQEEYVKR.A	34.341	13	0.98847	1	-0.234587	7.8125e-13
AATYHVDR	SPB3_HUMAN	Q8IXI3	K.AATYHVDR.S	42.821	15	0.99119	1	-0.0531429	3.90625e-12
AATYHVDR	SPB4_HUMAN	P48594	K.AATYHVDR.S	27.179	10	0.99119	1	-0.0531429	3.90625e-12
AAVAAVLSPEEFMVLLDSVLPESAHR	LPLC1_HUMAN	Q9H4V6	K.AAVAAVLSPEEFMVLLDSVLPESAHR.L	45.041	20	0.99391	1	1.87323	4.56372e-25
AAVLEYLTAEILELAGNAAR	H2A1B_HUMAN	P04908	L.AAVLEYLTAEILELAGNAAR.D	57.692	14	0.99267	1	1.2971	4.48773e-19
AAVLEYLTAEILELAGNAAR	H2A1C_HUMAN	Q93077	L.AAVLEYLTAEILELAGNAAR.D	63.077	15	0.99267	1	1.2971	4.48773e-19
AAVLEYLTAEILELAGNAAR	H2A1D_HUMAN	P20671	L.AAVLEYLTAEILELAGNAAR.D	57.692	14	0.99267	1	1.2971	4.48773e-19
AAVLEYLTAEILELAGNAAR	H2A1H_HUMAN	Q96KK5	L.AAVLEYLTAEILELAGNAAR.D	64.062	15	0.99267	1	1.2971	4.48773e-19
AAVLEYLTAEILELAGNAAR	H2A1J_HUMAN	Q99878	L.AAVLEYLTAEILELAGNAAR.D	64.062	15	0.99267	1	1.2971	4.48773e-19
AAVLEYLTAEILELAGNAAR	H2A1_HUMAN	P0C0S8	L.AAVLEYLTAEILELAGNAAR.D	63.077	15	0.99267	1	1.2971	4.48773e-19
AAVLEYLTAEILELAGNAAR	H2A2A_HUMAN	Q6FI13	M.AAVLEYLTAEILELAGNAAR.D	63.077	16	0.99267	1	1.2971	4.48773e-19
AAVLEYLTAEILELAGNAAR	H2A2B_HUMAN	Q8IUE6	L.AAVLEYLTAEILELAGNAAR.D	49.231	12	0.99267	1	1.2971	4.48773e-19
AAVLEYLTAEILELAGNAAR	H2A2C_HUMAN	Q16777	M.AAVLEYLTAEILELAGNAAR.D	63.566	16	0.99267	1	1.2971	4.48773e-19
AAVLEYLTAEILELAGNAAR	H2A3_HUMAN	Q7L7L0	L.AAVLEYLTAEILELAGNAAR.D	57.692	14	0.99267	1	1.2971	4.48773e-19
AAVLEYLTAEILELAGNAAR	H2AJ_HUMAN	Q9BTM1	L.AAVLEYLTAEILELAGNAAR.D	63.566	15	0.99267	1	1.2971	4.48773e-19
AAVLEYLTAEILELAGNAAR	H2AX_HUMAN	P16104	L.AAVLEYLTAEILELAGNAAR.D	39.86	11	0.99267	1	1.2971	4.48773e-19
AAVLEYLTAEILELAGNAAR	H2AY_HUMAN	O75367	M.AAVLEYLTAEILELAGNAAR.D	5.914	9	0.99267	1	1.2971	4.48773e-19
AAVPSGASTGIYEALELR	ENOA_HUMAN	Q6GMP2	R.AAVPSGASTGIYEALELR.D	64.977	24	0.99299	1	0.461214	3.08991e-22
AAYEAELGDARK	LMNA_HUMAN	P02545	K.AAYEAELGDARK.T	24.096	14	0.85561	1	1.30826	1.03209e-12
AAYEDFNVQLR	MUC5B_HUMAN	Q7M4S5	R.AAYEDFNVQLR.R	6.265	25	0.99329	1	1.37562	1.95313e-15
AAYEDFNVQLRR	MUC5B_HUMAN	Q7M4S5	R.AAYEDFNVQLRR.G	6.265	25	0.97923	1	0.844374	1.79381e-12
AAYLQETGKPLDETLK	ANXA1_HUMAN	P04083	K.AAYLQETGKPLDETLK.K	67.052	42	0.9934	1	1.32297	8.46988e-18
AAYLQETGKPLDETLKK	ANXA1_HUMAN	P04083	K.AAYLQETGKPLDETLKK.A	67.052	42	0.9939	1	0.605086	1.60714e-18
ADAAPDEKVLDSGFR	PIGR_HUMAN	P01833	K.ADAAPDEKVLDSGFR.E	27.88	25	0.99361	1	1.2342	6.54595e-15
ADAAPDEKVLDSGFREIENK	PIGR_HUMAN	P01833	K.ADAAPDEKVLDSGFREIENK.A	27.88	25	0.99334	1	0.814316	9.91382e-19
ADAVTLDGGFIYEAGLAPYK	TRFL_HUMAN	Q8TCD2	R.ADAVTLDGGFIYEAGLAPYK.L	34.085	34	0.99194	1	1.14375	9.36874e-22
ADDGRPFPQVIK	ALDOA_HUMAN	P04075	K.ADDGRPFPQVIK.S	34.341	13	0.99372	1	1.53678	9.76563e-17
ADEFLNWHALFESIKR	KTDAP_HUMAN	P60985	K.ADEFLNWHALFESIKR.K	27.273	2	0.99219	1	0.785622	3.60467e-16
ADEGISFR	PRDX1_HUMAN	Q06830	K.ADEGISFR.G	48.744	12	0.99316	1	0.862188	1.95313e-11
ADHGEPIGR	H90B3_HUMAN	Q58FF7	H.ADHGEPIGR.G	12.563	6	0.97441	1	1.69087	9.375e-11
ADHGEPIGR	HS90B_HUMAN	P08238	R.ADHGEPIGR.G	24.171	15	0.97441	1	1.69087	9.375e-11
ADLELHYQEFIR	DESP_HUMAN	P15924	I.ADLELHYQEFIR.N	49.739	138	0.99181	1	1.00413	1.73828e-13
ADLEMQIENLKEELAYLKK	K1C17_HUMAN	Q8N1P6	R.ADLEMQIENLKEELAYLKK.N	60.648	30	0.99201	1	1.71663	1.07697e-18
ADLEMQIESLKEELAYLK	K1C14_HUMAN	P02533	R.ADLEMQIESLKEELAYLK.K	60.593	45	0.99326	1	1.00415	9.70703e-21
ADLEMQIESLKEELAYLKK	K1C14_HUMAN	P02533	R.ADLEMQIESLKEELAYLKK.N	60.593	45	0.99273	0.999969	1.42677	5.18041e-19
ADLEMQIESLTEELAYLKK	K1C10_HUMAN	P13645	K.ADLEMQIESLTEELAYLKK.N	52.74	27	0.99098	1	1.4	4.58845e-19
ADLINNLGTIAK	H90B2_HUMAN	Q58FF8	K.ADLINNLGTIAK.F	18.373	6	0.99378	1	0.785537	1.02158e-14
ADLINNLGTIAK	HS902_HUMAN	Q14568	K.ADLINNLGTIAK.S	20.408	6	0.99378	1	0.785537	1.02158e-14
ADLINNLGTIAK	HS90A_HUMAN	P07900	K.ADLINNLGTIAK.S	19.945	13	0.99378	1	0.785537	1.02158e-14
ADLINNLGTIAK	HS90B_HUMAN	P08238	K.ADLINNLGTIAK.S	24.171	15	0.99378	1	0.785537	1.02158e-14
ADLSGITGAR	AACT_HUMAN	Q6NSC9	K.ADLSGITGAR.N	4.492	2	0.99278	1	0.773525	8.20313e-13
ADLSGMSGAR	ILEU_HUMAN	P30740	K.ADLSGMSGAR.D	59.367	17	0.99211	1	1.44284	4.10156e-13
ADTLTDEINFLR	K2C6A_HUMAN	P02538	K.ADTLTDEINFLR.A	70.035	77	0.99314	1	0.642921	1.95313e-16
ADTLTDEINFLR	K2C6B_HUMAN	P04259	K.ADTLTDEINFLR.A	68.44	73	0.99314	1	0.642921	1.95313e-16
ADTLTDEINFLR	K2C6C_HUMAN	P48668	K.ADTLTDEINFLR.A	67.553	75	0.99314	1	0.642921	1.95313e-16
ADTLTDEINFLRA	K2C6A_HUMAN	P02538	K.ADTLTDEINFLRA.L	70.035	77	0.99223	1	1.23046	4.1001e-16
ADTLTDEINFLRA	K2C6B_HUMAN	P04259	K.ADTLTDEINFLRA.L	68.44	73	0.99223	1	1.23046	4.1001e-16
ADTLTDEINFLRA	K2C6C_HUMAN	P48668	K.ADTLTDEINFLRA.L	67.553	75	0.99223	1	1.23046	4.1001e-16
ADVDVSGPK	AHNK_HUMAN	Q09666	K.ADVDVSGPK.M	19.508	36	0.98511	0.994709	0.873156	3.90625e-13
AEAEALYQTK	K2C3_HUMAN	P12035	K.AEAEALYQTK.L	32.006	23	0.99306	1	1.7111	3.90625e-14
AEAEALYQTK	K2C4_HUMAN	P19013	K.AEAEALYQTK.V	74.532	75	0.99306	1	1.7111	3.90625e-14
AEAEALYQTK	K2C71_HUMAN	Q3SY84	K.AEAEALYQTK.F	5.545	5	0.99306	1	1.7111	3.90625e-14
AEAEALYQTK	K2C73_HUMAN	Q86Y46	K.AEAEALYQTK.F	7.593	7	0.99306	1	1.7111	3.90625e-14
AEAEALYQTK	K2C74_HUMAN	Q7RTS7	K.AEAEALYQTK.I	3.97	4	0.99306	1	1.7111	3.90625e-14
AEAEALYQTK	K2C78_HUMAN	Q8N1N4	K.AEAEALYQTK.Y	44.038	31	0.99306	1	1.7111	3.90625e-14
AEAESLYQSK	K2C1_HUMAN	P04264	K.AEAESLYQSK.Y	66.77	58	0.99351	1	1.28951	3.90625e-14
AEAESWYQTK	K2C6A_HUMAN	P02538	R.AEAESWYQTK.Y	70.035	77	0.99252	1	0.497464	1.95313e-14
AEAESWYQTK	K2C6B_HUMAN	P04259	R.AEAESWYQTK.Y	68.44	73	0.99252	1	0.497464	1.95313e-14
AEAESWYQTK	K2C6C_HUMAN	P48668	R.AEAESWYQTK.Y	67.553	75	0.99252	1	0.497464	1.95313e-14
AEAESWYQTK	K2C75_HUMAN	O95678	R.AEAESWYQTK.Y	20.145	22	0.99252	1	0.497464	1.95313e-14
AEAESWYQTKYEELQVTAGR	K2C6A_HUMAN	P02538	R.AEAESWYQTKYEELQVTAGR.H	70.035	77	0.99321	1	0.566131	1.06637e-21
AEAESWYQTKYEELQVTAGR	K2C6C_HUMAN	P48668	R.AEAESWYQTKYEELQVTAGR.H	67.553	75	0.99321	1	0.566131	1.06637e-21
AEAESWYQTKYEELQVTAGR	K2C75_HUMAN	O95678	R.AEAESWYQTKYEELQVTAGR.H	20.145	22	0.99321	1	0.566131	1.06637e-21
AEAHFER	CF058_HUMAN	Q6P5S2	K.AEAHFER.S	33.939	8	0.99194	1	0.321412	7.8125e-11
AEDGSVIDYELIDQDAR	ANXA2_HUMAN	P07355	R.AEDGSVIDYELIDQDAR.D	53.097	24	0.993	1	0.459831	1.4047e-18
AEEREQIKTLNNK	K2C6A_HUMAN	P02538	R.AEEREQIKTLNNK.F	70.035	77	0.99323	1	0.56921	3.66719e-14
AEEREQIKTLNNK	K2C6B_HUMAN	P04259	R.AEEREQIKTLNNK.F	68.44	73	0.99323	1	0.56921	3.66719e-14
AEEREQIKTLNNK	K2C6C_HUMAN	P48668	R.AEEREQIKTLNNK.F	67.553	75	0.99323	1	0.56921	3.66719e-14
AEEREQIKTLNNK	K2C75_HUMAN	O95678	R.AEEREQIKTLNNK.F	20.145	22	0.99323	1	0.56921	3.66719e-14
AEEYEFLTPVEEAPK	GDIR1_HUMAN	P52565	R.AEEYEFLTPVEEAPK.G	15.686	2	0.9915	1	0.607655	4.35471e-14
AEFAEVSK	ALBU_HUMAN	Q9P157	K.AEFAEVSK.L	41.544	47	0.99236	1	1.41159	3.90625e-12
AEFAEVSKLVTDLTK	ALBU_HUMAN	Q9P157	K.AEFAEVSKLVTDLTK.V	41.544	47	0.99016	1	1.03704	2.50244e-20
AEGPEVDVNLPK	AHNK_HUMAN	Q09666	K.AEGPEVDVNLPK.A	19.508	36	0.99312	1	1.3321	4.88281e-17
AEIDNVKK	K2C5_HUMAN	P13647	R.AEIDNVKK.Q	65.932	71	0.98198	1	0.909555	1.5625e-11
AEIENIKK	K2C4_HUMAN	P19013	R.AEIENIKK.Q	74.532	75	0.99081	0.996353	0.914647	3.125e-11
AEILELAGNAAR	H2A1B_HUMAN	P04908	T.AEILELAGNAAR.D	57.692	14	0.99322	1	0.90889	9.86328e-15
AEILELAGNAAR	H2A1C_HUMAN	Q93077	T.AEILELAGNAAR.D	63.077	15	0.99322	1	0.90889	9.86328e-15
AEILELAGNAAR	H2A1D_HUMAN	P20671	T.AEILELAGNAAR.D	57.692	14	0.99322	1	0.90889	9.86328e-15
AEILELAGNAAR	H2A1H_HUMAN	Q96KK5	T.AEILELAGNAAR.D	64.062	15	0.99322	1	0.90889	9.86328e-15
AEILELAGNAAR	H2A1J_HUMAN	Q99878	T.AEILELAGNAAR.D	64.062	15	0.99322	1	0.90889	9.86328e-15
AEILELAGNAAR	H2A1_HUMAN	P0C0S8	T.AEILELAGNAAR.D	63.077	15	0.99322	1	0.90889	9.86328e-15
AEILELAGNAAR	H2A2A_HUMAN	Q6FI13	T.AEILELAGNAAR.D	63.077	16	0.99322	1	0.90889	9.86328e-15
AEILELAGNAAR	H2A2B_HUMAN	Q8IUE6	T.AEILELAGNAAR.D	49.231	12	0.99322	1	0.90889	9.86328e-15
AEILELAGNAAR	H2A2C_HUMAN	Q16777	T.AEILELAGNAAR.D	63.566	16	0.99322	1	0.90889	9.86328e-15
AEILELAGNAAR	H2A3_HUMAN	Q7L7L0	T.AEILELAGNAAR.D	57.692	14	0.99322	1	0.90889	9.86328e-15
AEILELAGNAAR	H2AJ_HUMAN	Q9BTM1	T.AEILELAGNAAR.D	63.566	15	0.99322	1	0.90889	9.86328e-15
AEILELAGNAAR	H2AX_HUMAN	P16104	T.AEILELAGNAAR.D	39.86	11	0.99322	1	0.90889	9.86328e-15
AEILELAGNAAR	H2AY_HUMAN	O75367	T.AEILELAGNAAR.D	5.914	9	0.99322	1	0.90889	9.86328e-15
AELIVQPELK	DESP_HUMAN	P15924	R.AELIVQPELK.Y	49.739	138	0.99349	1	0.848366	1.26378e-12
AELNEFLTR	RS3_HUMAN	P23396	K.AELNEFLTR.E	16.049	4	0.99331	1	1.20085	6.89649e-12
AEMDMVAWGVDLASVEQHINSHR	DESP_HUMAN	P15924	R.AEMDMVAWGVDLASVEQHINSHR.G	49.739	138	0.9931	1	1.15088	2.57091e-19
AENEFVTIKK	K2C1_HUMAN	P04264	N.AENEFVTIKK.D	66.77	58	0.99283	0.543718	0.437487	4.64653e-12
AENFFILR	ARPC4_HUMAN	P59998	R.AENFFILR.R	11.31	2	0.99347	1	1.71644	1.64063e-11
AENGKLVINGNPITIFQERDPSK	G3P_HUMAN	P04406	K.AENGKLVINGNPITIFQERDPSK.I	65.97	33	0.99273	1	0.851599	2.2755e-20
AENYPEVSIDQVGQVLTCSLETGLTCKN	MUC5B_HUMAN	Q7M4S5	R.AENYPEVSIDQVGQVLTCSLETGLTCKN.E	6.265	25	0.99178	1	0.287733	7.89832e-18
AFALWSAVTPLTFTR	MMP9_HUMAN	P14780	R.AFALWSAVTPLTFTR.V	7.638	4	0.99275	1	1.02101	9.05819e-17
AFAMIIDKLEEDINSSMTNSTAASRPPVTLR	PCBP1_HUMAN	Q15365	K.AFAMIIDKLEEDINSSMTNSTAASRPPVTLR.L	12.36	2	0.99359	1	1.77138	4.69316e-16
AFGFSHLEALLDDSKELQR	OTUB1_HUMAN	Q96FW1	R.AFGFSHLEALLDDSKELQR.F	10.701	2	0.99201	1	1.80236	1.00983e-16
AFHDNEETFLKK	ALBU_HUMAN	Q9P157	T.AFHDNEETFLKK.Y	41.544	47	0.99299	1	0.638213	1.05469e-15
AFHEQPELQK	CYTN_HUMAN	P01037	C.AFHEQPELQK.K	62.411	13	0.99258	1	1.52275	4.34508e-11
AFHEQPELQK	CYTS_HUMAN	P01036	C.AFHEQPELQK.K	60.993	15	0.99258	1	1.52275	4.34508e-11
AFHEQPELQK	CYTT_HUMAN	P09228	C.AFHEQPELQK.K	41.135	8	0.99258	1	1.52275	4.34508e-11
AFHEQPELQKK	CYTN_HUMAN	P01037	C.AFHEQPELQKK.Q	62.411	13	0.99296	1	0.709091	3.07564e-12
AFHEQPELQKK	CYTS_HUMAN	P01036	C.AFHEQPELQKK.Q	60.993	15	0.99296	1	0.709091	3.07564e-12
AFHEQPELQKK	CYTT_HUMAN	P09228	C.AFHEQPELQKK.Q	41.135	8	0.99296	1	0.709091	3.07564e-12
AFIGFEGVK	DESP_HUMAN	P15924	K.AFIGFEGVK.G	49.739	138	0.99386	1	1.12869	1.5625e-12
AFLASPEYV	GSTP1_HUMAN	P09211	K.AFLASPEYV.N	65.714	12	0.98518	1	1.72798	1.5625e-12
AFLTLAEDILR	RAB10_HUMAN	P61026	K.AFLTLAEDILR.K	17	4	0.99251	1	1.02284	7.8125e-15
AFMTADLPNELIELLEK	CLH1_HUMAN	Q00610	K.AFMTADLPNELIELLEK.I	10.627	13	0.9912	1	0.955546	1.45445e-19
AFMTADLPNELIELLEK	CLH2_HUMAN	P53675	K.AFMTADLPNELIELLEK.I	3.171	5	0.9912	1	0.955546	1.45445e-19
AFQPFFVELTMPYSVIR	A2MG_HUMAN	P01023	R.AFQPFFVELTMPYSVIR.G	24.763	26	0.99276	1	2.13884	8.22923e-19
AFQPFFVELTMPYSVIR	PZP_HUMAN	P20742	R.AFQPFFVELTMPYSVIR.G	3.914	5	0.99276	1	2.13884	8.22923e-19
AFTGIEDPVTK	EVPL_HUMAN	Q92817	K.AFTGIEDPVTK.K	19.97	31	0.99303	1	1.82543	4.7273e-14
AFYAELYHIISSNLEK	PSME2_HUMAN	Q9UL46	R.AFYAELYHIISSNLEK.I	18.828	3	0.99223	1	1.28616	1.14344e-17
AFYVNVLNEEQR	CATA_HUMAN	P04040	R.AFYVNVLNEEQR.K	7.78	3	0.99354	1	0.558981	1.38184e-15
AGAAPYVQAFDSLLAGPVAEYLK	CAP1_HUMAN	Q01518	K.AGAAPYVQAFDSLLAGPVAEYLK.I	14.316	5	0.99217	1	0.915106	4.20945e-23
AGAISASGPELQGAGHSK	AHNK_HUMAN	Q09666	R.AGAISASGPELQGAGHSK.L	19.508	36	0.99274	1	1.06096	8.00694e-17
AGALNLDITGQLR	BPIL1_HUMAN	Q8N4F0	K.AGALNLDITGQLR.S	41.266	14	0.99316	1	0.599519	4.00391e-17
AGALNSNDAFVLK	GELS_HUMAN	P06396	K.AGALNSNDAFVLK.T	20.077	11	0.99141	1	0.898014	2.09961e-16
AGALQNLTASK	PKP1_HUMAN	Q13835	C.AGALQNLTASK.G	30.254	18	0.99299	1	1.20093	8.39414e-12
AGEYGAEALER	HBA_HUMAN	P69905	H.AGEYGAEALER.M	85.915	14	0.99286	0.700575	0.690057	1.37695e-12
AGFAGDDAPR	ACTA_HUMAN	P62736	K.AGFAGDDAPR.A	46.154	28	0.99346	1	1.47666	9.76563e-15
AGFAGDDAPR	ACTB_HUMAN	Q96HG5	K.AGFAGDDAPR.A	80.8	48	0.99346	1	1.47666	9.76563e-15
AGFAGDDAPR	ACTC_HUMAN	P68032	K.AGFAGDDAPR.A	48.806	32	0.99346	1	1.47666	9.76563e-15
AGFAGDDAPR	ACTG_HUMAN	P63261	K.AGFAGDDAPR.A	80.8	48	0.99346	1	1.47666	9.76563e-15
AGFAGDDAPR	ACTH_HUMAN	P63267	K.AGFAGDDAPR.A	46.277	28	0.99346	1	1.47666	9.76563e-15
AGFAGDDAPR	ACTS_HUMAN	P68133	K.AGFAGDDAPR.A	45.093	30	0.99346	1	1.47666	9.76563e-15
AGFAGDDAPR	POTEE_HUMAN	Q6S8J3	K.AGFAGDDAPR.A	12.186	18	0.99346	1	1.47666	9.76563e-15
AGFAGDDAPR	POTEF_HUMAN	A5A3E0	K.AGFAGDDAPR.A	10.512	17	0.99346	1	1.47666	9.76563e-15
AGKEPGLQIWR	GELS_HUMAN	P06396	K.AGKEPGLQIWR.V	20.077	11	0.99274	1	1.29594	8.41846e-15
AGLIDWNMFVK	PEPL_HUMAN	O60437	R.AGLIDWNMFVK.L	32.517	52	0.99251	1	0.907123	1.03613e-13
AGLLTEEIR	A2ML1_HUMAN	A8K2U0	K.AGLLTEEIR.S	27.854	29	0.99312	1	1.0757	1.5625e-12
AGLQADLEVAAQK	EVPL_HUMAN	Q92817	R.AGLQADLEVAAQK.V	19.97	31	0.99345	1	0.818086	8.00782e-16
AGLQFPVGR	H2A1A_HUMAN	Q96QV6	R.AGLQFPVGR.I	21.374	2	0.99218	0.99167	1.0783	7.8125e-13
AGLQFPVGR	H2A1B_HUMAN	P04908	R.AGLQFPVGR.V	57.692	14	0.99218	0.99167	1.0783	7.8125e-13
AGLQFPVGR	H2A1C_HUMAN	Q93077	R.AGLQFPVGR.V	63.077	15	0.99218	0.99167	1.0783	7.8125e-13
AGLQFPVGR	H2A1D_HUMAN	P20671	R.AGLQFPVGR.V	57.692	14	0.99218	0.99167	1.0783	7.8125e-13
AGLQFPVGR	H2A1H_HUMAN	Q96KK5	R.AGLQFPVGR.V	64.062	15	0.99218	0.99167	1.0783	7.8125e-13
AGLQFPVGR	H2A1J_HUMAN	Q99878	R.AGLQFPVGR.V	64.062	15	0.99218	0.99167	1.0783	7.8125e-13
AGLQFPVGR	H2A1_HUMAN	P0C0S8	R.AGLQFPVGR.V	63.077	15	0.99218	0.99167	1.0783	7.8125e-13
AGLQFPVGR	H2A2A_HUMAN	Q6FI13	R.AGLQFPVGR.V	63.077	16	0.99218	0.99167	1.0783	7.8125e-13
AGLQFPVGR	H2A2B_HUMAN	Q8IUE6	R.AGLQFPVGR.V	49.231	12	0.99218	0.99167	1.0783	7.8125e-13
AGLQFPVGR	H2A2C_HUMAN	Q16777	R.AGLQFPVGR.V	63.566	16	0.99218	0.99167	1.0783	7.8125e-13
AGLQFPVGR	H2A3_HUMAN	Q7L7L0	R.AGLQFPVGR.V	57.692	14	0.99218	0.99167	1.0783	7.8125e-13
AGLQFPVGR	H2AJ_HUMAN	Q9BTM1	R.AGLQFPVGR.V	63.566	15	0.99218	0.99167	1.0783	7.8125e-13
AGLQFPVGR	H2AV_HUMAN	Q71UI9	R.AGLQFPVGR.I	25	3	0.99218	0.99167	1.0783	7.8125e-13
AGLQFPVGR	H2AX_HUMAN	P16104	R.AGLQFPVGR.V	39.86	11	0.99218	0.99167	1.0783	7.8125e-13
AGLVYQEAGVLK	BPI_HUMAN	Q9H203	T.AGLVYQEAGVLK.M	10.062	4	0.99242	1	1.26238	1.10103e-12
AGNNMLLVGVHGPR	FLNA_HUMAN	P21333	K.AGNNMLLVGVHGPR.T	1.964	4	0.99272	1	0.73304	3.07185e-14
AGQAVDDFIEK	6PGD_HUMAN	P52209	K.AGQAVDDFIEK.L	41.615	17	0.99395	1	1.67509	8.00781e-14
AGTQIENIDEDFRDGLK	ACTN4_HUMAN	O43707	K.AGTQIENIDEDFRDGLK.L	42.371	27	0.99175	1	1.42053	6.31936e-12
AGVEEQEGLLSFQEDR	EVPL_HUMAN	Q92817	R.AGVEEQEGLLSFQEDR.S	19.97	31	0.99299	1	0.745635	4.41895e-19
AGVNYFLDVELGR	CYTC_HUMAN	P01034	V.AGVNYFLDVELGR.T	34.247	7	0.99197	1	1.07788	7.33399e-15
AGYTDKVVIGMDV	ENOA_HUMAN	Q6GMP2	K.AGYTDKVVIGMDV.A	64.977	24	0.99304	1	1.2163	6.41455e-11
AGYTDKVVIGMDVAASEFFR	ENOA_HUMAN	Q6GMP2	K.AGYTDKVVIGMDVAASEFFR.S	64.977	24	0.99357	1	0.85933	4.31723e-19
AHFSISNSAEDPFIAI	AMY1_HUMAN	P04745	K.AHFSISNSAEDPFIAI.H	65.362	60	0.99317	1	0.502261	8.55466e-13
AHFSISNSAEDPFIAI	AMY2B_HUMAN	P19961	K.AHFSISNSAEDPFIAI.H	53.816	42	0.99317	1	0.502261	8.55466e-13
AHFSISNSAEDPFIAI	AMYP_HUMAN	P04746	K.AHFSISNSAEDPFIAI.H	45.597	37	0.99317	1	0.502261	8.55466e-13
AHFSISNSAEDPFIAIHAESK	AMY1_HUMAN	P04745	K.AHFSISNSAEDPFIAIHAESK.L	65.362	60	0.9932	1	0.932471	4.57764e-27
AHFSISNSAEDPFIAIHAESK	AMY2B_HUMAN	P19961	K.AHFSISNSAEDPFIAIHAESK.L	53.816	42	0.9932	1	0.932471	4.57764e-27
AHFSISNSAEDPFIAIHAESK	AMYP_HUMAN	P04746	K.AHFSISNSAEDPFIAIHAESK.L	45.597	37	0.9932	1	0.932471	4.57764e-27
AHFSISNSAEDPFIAIHAESKL	AMY1_HUMAN	P04745	K.AHFSISNSAEDPFIAIHAESKL.-	65.362	60	0.99167	1	0.048129	1.05562e-24
AHFSISNSAEDPFIAIHAESKL	AMY2B_HUMAN	P19961	K.AHFSISNSAEDPFIAIHAESKL.-	53.816	42	0.99167	1	0.048129	1.05562e-24
AHFSISNSAEDPFIAIHAESKL	AMYP_HUMAN	P04746	K.AHFSISNSAEDPFIAIHAESKL.-	45.597	37	0.99167	1	0.048129	1.05562e-24
AHQTGETVTGSGTQTQAGATQTVEQDSSHQTGR	CRNN_HUMAN	Q9UBG3	R.AHQTGETVTGSGTQTQAGATQTVEQDSSHQTGR.T	54.141	18	0.99301	1	0.760209	1.64362e-33
AHSSMVGVNLPQK	PGK1_HUMAN	P00558	R.AHSSMVGVNLPQK.A	42.926	14	0.99284	1	1.10814	4.88281e-18
AHYGGFTVQNEANK	FIBB_HUMAN	P02675	K.AHYGGFTVQNEANK.Y	26.477	10	0.99228	1	1.24616	2.01111e-19
AHYGGFTVQNEANKYQISVNK	FIBB_HUMAN	P02675	K.AHYGGFTVQNEANKYQISVNK.Y	26.477	10	0.99198	1	1.17014	3.4768e-22
AIAANEADAVTLDAGLVYDAYLAPNNLKPVVAEFYGSK	TRFE_HUMAN	P02787	R.AIAANEADAVTLDAGLVYDAYLAPNNLKPVVAEFYGSK.E	29.37	20	0.99273	1	1.12939	2.13102e-22
AIAEAIKK	FAM25_HUMAN	Q5VTM1	K.AIAEAIKK.A	64.045	3	0.70961	1	0.645561	3.20313e-11
AIAELGIYPAVDPLDSTSR	ATPB_HUMAN	P06576	R.AIAELGIYPAVDPLDSTSR.I	30.435	10	0.9938	1	0.939343	7.66885e-14
AIDGINQR	CAMP_HUMAN	P49913	R.AIDGINQR.S	9.412	2	0.99279	1	1.28655	3.125e-11
AIGGGLSSVGGGSSTI	K2C6A_HUMAN	P02538	R.AIGGGLSSVGGGSSTI.K	70.035	77	0.99264	1	2.29329	3.52173e-19
AIGGGLSSVGGGSSTI	K2C6C_HUMAN	P48668	R.AIGGGLSSVGGGSSTI.K	67.553	75	0.99264	1	2.29329	3.52173e-19
AIGGGLSSVGGGSSTIK	K2C6A_HUMAN	P02538	R.AIGGGLSSVGGGSSTIK.Y	70.035	77	0.99282	1	0.149022	6.10352e-23
AIGGGLSSVGGGSSTIK	K2C6C_HUMAN	P48668	R.AIGGGLSSVGGGSSTIK.Y	67.553	75	0.99282	1	0.149022	6.10352e-23
AIGGGLSSVGGGSSTIKYTTTSSSSR	K2C6A_HUMAN	P02538	R.AIGGGLSSVGGGSSTIKYTTTSSSSR.K	70.035	77	0.98717	1	-0.132012	8.82489e-28
AIGGGLSSVGGGSSTIKYTTTSSSSR	K2C6C_HUMAN	P48668	R.AIGGGLSSVGGGSSTIKYTTTSSSSR.K	67.553	75	0.98717	1	-0.132012	8.82489e-28
AIGTLIVTK	TGM1_HUMAN	P22735	K.AIGTLIVTK.A	26.683	16	0.98789	1	1.93706	1.5625e-12
AIGYLNTGYQR	A2MG_HUMAN	P01023	K.AIGYLNTGYQR.Q	24.763	26	0.99334	1	0.959322	4.49219e-15
AIHNPFRPWWER	AMY1_HUMAN	P04745	V.AIHNPFRPWWER.Y	65.362	60	0.99232	1	1.17675	4.12867e-14
AIHNPFRPWWER	AMY2B_HUMAN	P19961	V.AIHNPFRPWWER.Y	53.816	42	0.99232	1	1.17675	4.12867e-14
AIKEKEYEIER	DESP_HUMAN	P15924	K.AIKEKEYEIER.L	49.739	138	0.99178	1	1.18629	7.8125e-15
AILDKLHNLNSNWFPEGSKPFIYQEV	AMY1_HUMAN	P04745	K.AILDKLHNLNSNWFPEGSKPFIYQEV.I	65.362	60	0.99261	1	0.975591	1.1502e-19
AILDKLHNLNSNWFPEGSKPFIYQEVI	AMY1_HUMAN	P04745	K.AILDKLHNLNSNWFPEGSKPFIYQEVI.D	65.362	60	0.99318	1	0.323145	5.30469e-19
AILDKLHNLNSNWFPEGSKPFIYQEVIDLGGEPI	AMY1_HUMAN	P04745	K.AILDKLHNLNSNWFPEGSKPFIYQEVIDLGGEPI.K	65.362	60	0.99324	1	1.07037	3.66797e-17
AILDKLHNLNSNWFPEGSKPFIYQEVIDLGGEPIK	AMY1_HUMAN	P04745	K.AILDKLHNLNSNWFPEGSKPFIYQEVIDLGGEPIK.S	65.362	60	0.99209	1	0.4121	1.92597e-31
AILDKLHNLNSNWFPEGSKPFIYQEVIDLGGEPIKSSDYFGNGR	AMY1_HUMAN	P04745	K.AILDKLHNLNSNWFPEGSKPFIYQEVIDLGGEPIKSSDYFGNGR.V	65.362	60	0.99173	1	0.174963	7.02225e-34
AILEQNFR	TRI29_HUMAN	Q14134	K.AILEQNFR.D	14.116	8	0.99282	1	1.04484	3.125e-11
AILVDLEPGTMDSVR	TBB2A_HUMAN	Q13885	R.AILVDLEPGTMDSVR.S	42.247	18	0.99292	1	0.567243	9.68849e-16
AILVDLEPGTMDSVR	TBB3_HUMAN	Q13509	R.AILVDLEPGTMDSVR.S	26.889	12	0.99292	1	0.567243	9.68849e-16
AILVDLEPGTMDSVR	TBB5_HUMAN	P07437	R.AILVDLEPGTMDSVR.S	40.09	16	0.99292	1	0.567243	9.68849e-16
AIMTYVSSFYHAFSGAQK	ACTN1_HUMAN	P12814	K.AIMTYVSSFYHAFSGAQK.A	13.901	10	0.98862	1	1.28174	8.84647e-21
AIMTYVSSFYHAFSGAQK	ACTN4_HUMAN	O43707	K.AIMTYVSSFYHAFSGAQK.A	42.371	27	0.98862	1	1.28174	8.84647e-21
AINDPFIDLNYMVYMFQYDSTHGK	G3P_HUMAN	P04406	V.AINDPFIDLNYMVYMFQYDSTHGK.F	65.97	33	0.99194	1	0.407593	9.77937e-19
AINDPFIDLNYMVYMFQYDSTHGKFHGTVK	G3P_HUMAN	P04406	V.AINDPFIDLNYMVYMFQYDSTHGKFHGTVK.A	65.97	33	0.97505	1	1.66966	1.20475e-16
AIRHPQYNQR	CATG_HUMAN	P08311	R.AIRHPQYNQR.T	29.412	10	0.89569	1	0.370142	8.78882e-12
AISGGYGSR	K2C6A_HUMAN	P02538	C.AISGGYGSR.A	70.035	77	0.99218	1	0.655914	3.90625e-12
AISGGYGSR	K2C6B_HUMAN	P04259	C.AISGGYGSR.A	68.44	73	0.99218	1	0.655914	3.90625e-12
AISGGYGSR	K2C6C_HUMAN	P48668	C.AISGGYGSR.A	67.553	75	0.99218	1	0.655914	3.90625e-12
AITGFDDPFSGK	DESP_HUMAN	P15924	K.AITGFDDPFSGK.T	49.739	138	0.99391	1	0.805445	4.88281e-17
AITGILRPPLEQGR	PEPL_HUMAN	O60437	K.AITGILRPPLEQGR.A	32.517	52	0.99221	1	1.10956	2.34792e-13
AKFEELNMDLFR	GRP78_HUMAN	P11021	R.AKFEELNMDLFR.S	25.994	13	0.99309	1	1.82207	1.95313e-16
AKFYPEDVAEELIQDITQK	EZRI_HUMAN	P15311	R.AKFYPEDVAEELIQDITQK.L	26.28	13	0.9924	1	1.37501	4.64821e-24
AKFYPEDVSEELIQDITQR	MOES_HUMAN	P26038	R.AKFYPEDVSEELIQDITQR.L	15.598	8	0.99369	1	1.49781	1.87912e-17
AKHDELTY	CYTB_HUMAN	P04080	K.AKHDELTY.F	70.408	10	0.92275	1	1.1372	1.58223e-11
AKHDELTYF	CYTB_HUMAN	P04080	K.AKHDELTYF.-	70.408	10	0.99348	1	0.846745	6.3715e-11
AKLAEQAER	1433B_HUMAN	P31946	K.AKLAEQAER.Y	36.179	8	0.99136	1	0.301711	2.34375e-12
AKLAEQAER	1433E_HUMAN	P62258	Q.AKLAEQAER.Y	19.608	5	0.99136	1	0.301711	2.34375e-12
AKLAEQAER	1433S_HUMAN	P31947	K.AKLAEQAER.Y	64.919	17	0.99136	1	0.301711	2.34375e-12
AKLAEQAER	1433T_HUMAN	P27348	K.AKLAEQAER.Y	22.449	5	0.99136	1	0.301711	2.34375e-12
AKLAEQAER	1433Z_HUMAN	Q6NUR9	K.AKLAEQAER.Y	53.878	14	0.99136	1	0.301711	2.34375e-12
AKQIVWNGPVGVFEWEAFAR	PGK1_HUMAN	P00558	R.AKQIVWNGPVGVFEWEAFAR.G	42.926	14	0.99295	1	0.719742	1.04554e-18
AKVAVLGASGGIGQPLSLLLK	MDHM_HUMAN	P40926	N.AKVAVLGASGGIGQPLSLLLK.N	27.219	7	0.89236	1	1.21896	3.68265e-11
ALAAAGYDVEKNNSR	H11_HUMAN	Q02539	K.ALAAAGYDVEKNNSR.I	15.349	3	0.9912	1	1.75037	2.594e-19
ALAAAGYDVEKNNSR	H12_HUMAN	P16403	K.ALAAAGYDVEKNNSR.I	26.291	6	0.9912	1	1.75037	2.594e-19
ALAAAGYDVEKNNSR	H13_HUMAN	P16402	K.ALAAAGYDVEKNNSR.I	25.339	6	0.9912	1	1.75037	2.594e-19
ALAAAGYDVEKNNSR	H14_HUMAN	P10412	K.ALAAAGYDVEKNNSR.I	25.571	6	0.9912	1	1.75037	2.594e-19
ALAAAGYDVEKNNSR	H1T_HUMAN	P22492	K.ALAAAGYDVEKNNSR.I	11.594	2	0.9912	1	1.75037	2.594e-19
ALAAGGYDVEK	H15_HUMAN	P16401	K.ALAAGGYDVEK.N	24.336	6	0.99383	1	0.757131	9.76563e-16
ALAAGGYDVEKNNSR	H15_HUMAN	P16401	K.ALAAGGYDVEKNNSR.I	24.336	6	0.99327	1	1.33588	7.63231e-15
ALDFAISEYNK	CYTD_HUMAN	P28325	C.ALDFAISEYNK.V	53.521	6	0.99359	1	0.836547	1.95313e-14
ALDFAVGEYNK	CYTC_HUMAN	P01034	R.ALDFAVGEYNK.A	34.247	7	0.99385	1	0.419224	9.76563e-16
ALDFEQEMATAASSSSLEK	ACTB_HUMAN	Q96HG5	V.ALDFEQEMATAASSSSLEK.S	80.8	48	0.99357	1	1.26023	2.45187e-21
ALDFEQEMATAASSSSLEK	ACTG_HUMAN	P63261	V.ALDFEQEMATAASSSSLEK.S	80.8	48	0.99357	1	1.26023	2.45187e-21
ALDFEQEMATAASSSSLEK	POTEE_HUMAN	Q6S8J3	V.ALDFEQEMATAASSSSLEK.S	12.186	18	0.99357	1	1.26023	2.45187e-21
ALDFIASK	ACTN1_HUMAN	P12814	K.ALDFIASK.G	13.901	10	0.99253	1	1.71968	1.5625e-11
ALDFIASK	ACTN3_HUMAN	Q08043	K.ALDFIASK.G	2.442	2	0.99253	1	1.71968	1.5625e-11
ALDFIASK	ACTN4_HUMAN	O43707	K.ALDFIASK.G	42.371	27	0.99253	1	1.71968	1.5625e-11
ALDGINSGITHAGR	SBSN_HUMAN	Q6UWP8	K.ALDGINSGITHAGR.E	46.964	9	0.99382	1	1.22828	4.88281e-19
ALDLFSDNAPPPELLEIINEDIAKR	PDIA6_HUMAN	Q15084	R.ALDLFSDNAPPPELLEIINEDIAKR.T	11.818	3	0.99375	1	0.372933	5.59813e-17
ALDYEQLQSVK	DSG3_HUMAN	P32926	K.ALDYEQLQSVK.L	9.61	7	0.99298	1	1.17045	7.8125e-15
ALEEANADLEVK	K1C13_HUMAN	P13646	R.ALEEANADLEVK.I	69.869	59	0.99341	1	0.816437	9.76563e-17
ALEEANADLEVK	K1C14_HUMAN	P02533	R.ALEEANADLEVK.I	60.593	45	0.99341	1	0.816437	9.76563e-17
ALEEANADLEVK	K1C15_HUMAN	P19012	R.ALEEANADLEVK.I	27.412	19	0.99341	1	0.816437	9.76563e-17
ALEEANADLEVK	K1C16_HUMAN	P08779	R.ALEEANADLEVK.I	72.304	50	0.99341	1	0.816437	9.76563e-17
ALEEANTELEVK	K1C17_HUMAN	Q8N1P6	R.ALEEANTELEVK.I	60.648	30	0.99352	0.96133	0.753489	9.76563e-17
ALEESNYELEGK	K1C10_HUMAN	P13645	R.ALEESNYELEGK.I	52.74	27	0.99293	1	0.168617	9.76563e-17
ALEHFTDLYDIKR	CLH1_HUMAN	Q00610	R.ALEHFTDLYDIKR.A	10.627	13	0.91251	1	0.918182	1.79438e-12
ALELDSNLYR	MYH9_HUMAN	P35579	K.ALELDSNLYR.I	15.357	24	0.99292	1	1.10548	7.8125e-14
ALESGDVNTVWK	IQGA1_HUMAN	P46940	R.ALESGDVNTVWK.Q	8.69	9	0.99056	1	0.602509	1.0791e-15
ALESPERPFLAILGGAK	PGK1_HUMAN	P00558	K.ALESPERPFLAILGGAK.V	42.926	14	0.99294	1	1.38723	2.11385e-18
ALGFEAAESSLTK	LPLC1_HUMAN	Q9H4V6	K.ALGFEAAESSLTK.D	45.041	20	0.99337	1	1.09067	4.88281e-18
ALGISPFHEHAEVVFTANDSGPR	TTHY_HUMAN	P02766	K.ALGISPFHEHAEVVFTANDSGPR.R	43.537	3	0.99267	1	0.564363	7.80658e-19
ALGPEVANVAK	PIGR_HUMAN	P01833	C.ALGPEVANVAK.F	27.88	25	0.99296	1	0.860999	9.76563e-15
ALGQNPTNAEVLK	MYL6_HUMAN	P60660	R.ALGQNPTNAEVLK.V	40.397	5	0.99303	1	0.0894569	1.20239e-17
ALHFAISEYNK	CYTN_HUMAN	P01037	R.ALHFAISEYNK.A	62.411	13	0.99352	1	0.735025	1.95313e-15
ALHFAISEYNK	CYTS_HUMAN	P01036	R.ALHFAISEYNK.A	60.993	15	0.99352	1	0.735025	1.95313e-15
ALHFAISEYNKATEDEYYR	CYTS_HUMAN	P01036	R.ALHFAISEYNKATEDEYYR.R	60.993	15	0.99288	1	1.02631	3.96729e-25
ALHFAISEYNKATEDEYYRRPLQVLR	CYTS_HUMAN	P01036	R.ALHFAISEYNKATEDEYYRRPLQVLR.A	60.993	15	0.99385	1	0.628671	1.04711e-18
ALHFVISEYNK	CYTT_HUMAN	P09228	R.ALHFVISEYNK.A	41.135	8	0.99246	1	0.794658	1.95313e-15
ALHVGFDNFEQLLSGAHWMDQHFR	G6PI_HUMAN	P06744	I.ALHVGFDNFEQLLSGAHWMDQHFR.T	38.351	14	0.98123	1	1.27508	7.08441e-16
ALIAAQYSGAQVR	EF1G_HUMAN	P26641	K.ALIAAQYSGAQVR.V	10.755	4	0.99329	1	0.765706	1.44571e-16
ALLAYAFALAGNQDK	A2MG_HUMAN	P01023	K.ALLAYAFALAGNQDK.R	24.763	26	0.99215	1	0.609525	6.57567e-18
ALLELQLEPEELYQTFQR	EF2_HUMAN	P13639	R.ALLELQLEPEELYQTFQR.I	33.566	23	0.99208	1	1.12809	1.12027e-20
ALLQAILQTEDMLK	DESP_HUMAN	P15924	R.ALLQAILQTEDMLK.V	49.739	138	0.99294	1	1.57736	1.17188e-17
ALLTLADGR	ANXA3_HUMAN	P12429	K.ALLTLADGR.R	31.579	8	0.97328	1	1.25574	1.5625e-12
ALMDEVVK	PGK1_HUMAN	P00558	K.ALMDEVVK.A	42.926	14	0.95141	1	1.67631	2.48828e-11
ALMGSPQLVAAVVR	PLAK_HUMAN	P14923	R.ALMGSPQLVAAVVR.T	42.55	30	0.99314	1	0.570314	6.53076e-19
ALNAQGLDVEKPLILTVK	DSG3_HUMAN	P32926	R.ALNAQGLDVEKPLILTVK.I	9.61	7	0.99295	1	1.06771	9.66511e-21
ALNSIIDVYHK	S10A8_HUMAN	P05109	K.ALNSIIDVYHK.Y	88.172	8	0.99286	1	1.08966	3.90625e-15
ALNSIIDVYHKYSLIK	S10A8_HUMAN	P05109	K.ALNSIIDVYHKYSLIK.G	88.172	8	0.98732	1	1.40151	5.84925e-18
ALNSMGQDLERPLELR	DSG1_HUMAN	Q02413	R.ALNSMGQDLERPLELR.V	15.253	10	0.99255	1	1.56235	6.93035e-13
ALPAPIEK	IGHG1_HUMAN	P01857	K.ALPAPIEK.T	34.848	16	0.9925	1	0.879527	1.5625e-11
ALPAPIEK	IGHG3_HUMAN	P01860	K.ALPAPIEK.T	22.546	13	0.9925	1	0.879527	1.5625e-11
ALPFWNEEIVPQIK	PGAM1_HUMAN	P18669	R.ALPFWNEEIVPQIK.E	42.913	9	0.9939	1	0.950263	1.79934e-16
ALPFWNEEIVPQIK	PGAM2_HUMAN	P15259	R.ALPFWNEEIVPQIK.A	16.206	4	0.9939	1	0.950263	1.79934e-16
ALPFWNEEIVPQIK	PGAM4_HUMAN	Q8N0Y7	R.ALPFWNEEIVPQIK.E	27.165	6	0.9939	1	0.950263	1.79934e-16
ALPGQLKPFET	GSTP1_HUMAN	P09211	K.ALPGQLKPFET.L	65.714	12	0.99143	1	1.38865	1.01852e-13
ALPGQLKPFETLLSQNQGGK	GSTP1_HUMAN	P09211	K.ALPGQLKPFETLLSQNQGGK.T	65.714	12	0.9939	1	0.734724	6.91826e-21
ALPLALVLHELGAGR	TYPH_HUMAN	P19971	R.ALPLALVLHELGAGR.S	8.506	2	0.99381	1	1.29256	7.77121e-13
ALQASALK	ALDOA_HUMAN	P04075	R.ALQASALK.A	34.341	13	0.99033	0.999999	1.57394	3.125e-11
ALQVTVPHFLDWSGEALQPT	BPIL1_HUMAN	Q8N4F0	R.ALQVTVPHFLDWSGEALQPT.R	41.266	14	0.99261	1	0.99682	1.13978e-11
ALQVTVPHFLDWSGEALQPTR	BPIL1_HUMAN	Q8N4F0	R.ALQVTVPHFLDWSGEALQPTR.I	41.266	14	0.99341	1	1.64248	9.93405e-26
ALTGHLEEV	ANXA1_HUMAN	P04083	K.ALTGHLEEV.V	67.052	42	0.89313	1	1.03318	7.8125e-13
ALTGHLEEVV	ANXA1_HUMAN	P04083	K.ALTGHLEEVV.L	67.052	42	0.9913	1	1.07063	6.58447e-12
ALTGHLEEVVLALLK	ANXA1_HUMAN	P04083	K.ALTGHLEEVVLALLK.T	67.052	42	0.99261	1	0.850618	9.76563e-20
ALTVPELTQQMFDAK	TBB3_HUMAN	Q13509	R.ALTVPELTQQMFDAK.N	26.889	12	0.99264	1	1.49941	2.44873e-16
ALTVPELTQQMFDSK	TBB2A_HUMAN	Q13885	R.ALTVPELTQQMFDSK.N	42.247	18	0.99335	1	1.18012	3.10005e-14
ALTVPELTQQVFDAK	TBB5_HUMAN	P07437	R.ALTVPELTQQVFDAK.N	40.09	16	0.99286	1	0.445479	1.66133e-15
ALVFVDNHDNQR	AMY1_HUMAN	P04745	R.ALVFVDNHDNQR.G	65.362	60	0.99386	1	0.841245	9.76563e-17
ALVFVDNHDNQR	AMY2B_HUMAN	P19961	R.ALVFVDNHDNQR.G	53.816	42	0.99386	1	0.841245	9.76563e-17
ALVFVDNHDNQR	AMYP_HUMAN	P04746	R.ALVFVDNHDNQR.G	45.597	37	0.99386	1	0.841245	9.76563e-17
ALVLIAFA	ALBU_HUMAN	Q9P157	K.ALVLIAFA.Q	41.544	47	0.96786	1	0.677027	3.125e-11
ALYDAELSQMQTHISDTSV	K2C6A_HUMAN	P02538	R.ALYDAELSQMQTHISDTSV.V	70.035	77	0.99258	1	0.470879	3.25675e-17
ALYDAELSQMQTHISDTSV	K2C6B_HUMAN	P04259	R.ALYDAELSQMQTHISDTSV.V	68.44	73	0.99258	1	0.470879	3.25675e-17
ALYDAELSQMQTHISDTSV	K2C6C_HUMAN	P48668	R.ALYDAELSQMQTHISDTSV.V	67.553	75	0.99258	1	0.470879	3.25675e-17
ALYDAELSQMQTHISDTSVV	K2C6A_HUMAN	P02538	R.ALYDAELSQMQTHISDTSVV.L	70.035	77	0.9925	1	0.192022	4.83748e-15
ALYDAELSQMQTHISDTSVV	K2C6B_HUMAN	P04259	R.ALYDAELSQMQTHISDTSVV.L	68.44	73	0.9925	1	0.192022	4.83748e-15
ALYDAELSQMQTHISDTSVV	K2C6C_HUMAN	P48668	R.ALYDAELSQMQTHISDTSVV.L	67.553	75	0.9925	1	0.192022	4.83748e-15
ALYDAELSQMQTHISDTSVVLSMDNNR	K2C6A_HUMAN	P02538	R.ALYDAELSQMQTHISDTSVVLSMDNNR.N	70.035	77	0.99234	1	0.0753931	3.37137e-24
ALYDAELSQMQTHISDTSVVLSMDNNR	K2C6B_HUMAN	P04259	R.ALYDAELSQMQTHISDTSVVLSMDNNR.N	68.44	73	0.99234	1	0.0753931	3.37137e-24
ALYDAELSQMQTHISDTSVVLSMDNNR	K2C6C_HUMAN	P48668	R.ALYDAELSQMQTHISDTSVVLSMDNNR.N	67.553	75	0.99234	1	0.0753931	3.37137e-24
ALYEAGER	ANXA1_HUMAN	P04083	R.ALYEAGER.R	67.052	42	0.9927	1	1.62215	7.8125e-12
ALYEAGERR	ANXA1_HUMAN	P04083	R.ALYEAGERR.K	67.052	42	0.98206	1	0.557571	3.49024e-12
AMGIMNSFVNDIFER	H2B1B_HUMAN	P33778	K.AMGIMNSFVNDIFER.I	38.889	11	0.99273	1	0.733183	1.2207e-20
AMGIMNSFVNDIFER	H2B1C_HUMAN	P62807	K.AMGIMNSFVNDIFER.I	38.889	11	0.99273	1	0.733183	1.2207e-20
AMGIMNSFVNDIFER	H2B1D_HUMAN	P58876	K.AMGIMNSFVNDIFER.I	38.889	11	0.99273	1	0.733183	1.2207e-20
AMGIMNSFVNDIFER	H2B1H_HUMAN	Q93079	K.AMGIMNSFVNDIFER.I	38.889	11	0.99273	1	0.733183	1.2207e-20
AMGIMNSFVNDIFER	H2B1J_HUMAN	P06899	K.AMGIMNSFVNDIFER.I	31.746	10	0.99273	1	0.733183	1.2207e-20
AMGIMNSFVNDIFER	H2B1K_HUMAN	O60814	K.AMGIMNSFVNDIFER.I	31.746	10	0.99273	1	0.733183	1.2207e-20
AMGIMNSFVNDIFER	H2B1L_HUMAN	Q99880	K.AMGIMNSFVNDIFER.I	38.889	11	0.99273	1	0.733183	1.2207e-20
AMGIMNSFVNDIFER	H2B1M_HUMAN	Q99879	K.AMGIMNSFVNDIFER.I	38.889	11	0.99273	1	0.733183	1.2207e-20
AMGIMNSFVNDIFER	H2B1N_HUMAN	Q99877	K.AMGIMNSFVNDIFER.I	38.889	11	0.99273	1	0.733183	1.2207e-20
AMGIMNSFVNDIFER	H2B1O_HUMAN	P23527	K.AMGIMNSFVNDIFER.I	38.889	11	0.99273	1	0.733183	1.2207e-20
AMGIMNSFVNDIFER	H2B2E_HUMAN	Q16778	K.AMGIMNSFVNDIFER.I	38.889	11	0.99273	1	0.733183	1.2207e-20
AMGIMNSFVNDIFER	H2B2F_HUMAN	Q5QNW6	K.AMGIMNSFVNDIFER.I	38.889	11	0.99273	1	0.733183	1.2207e-20
AMGIMNSFVNDIFER	H2B3B_HUMAN	Q8N257	K.AMGIMNSFVNDIFER.I	38.889	11	0.99273	1	0.733183	1.2207e-20
AMGIMNSFVNDIFER	H2BFS_HUMAN	P57053	K.AMGIMNSFVNDIFER.I	31.746	10	0.99273	1	0.733183	1.2207e-20
AMGIMNSFVNDIFERI	H2B1B_HUMAN	P33778	K.AMGIMNSFVNDIFERI.A	38.889	11	0.99345	1	1.14166	3.09342e-19
AMGIMNSFVNDIFERI	H2B1C_HUMAN	P62807	K.AMGIMNSFVNDIFERI.A	38.889	11	0.99345	1	1.14166	3.09342e-19
AMGIMNSFVNDIFERI	H2B1D_HUMAN	P58876	K.AMGIMNSFVNDIFERI.A	38.889	11	0.99345	1	1.14166	3.09342e-19
AMGIMNSFVNDIFERI	H2B1H_HUMAN	Q93079	K.AMGIMNSFVNDIFERI.A	38.889	11	0.99345	1	1.14166	3.09342e-19
AMGIMNSFVNDIFERI	H2B1J_HUMAN	P06899	K.AMGIMNSFVNDIFERI.A	31.746	10	0.99345	1	1.14166	3.09342e-19
AMGIMNSFVNDIFERI	H2B1K_HUMAN	O60814	K.AMGIMNSFVNDIFERI.A	31.746	10	0.99345	1	1.14166	3.09342e-19
AMGIMNSFVNDIFERI	H2B1L_HUMAN	Q99880	K.AMGIMNSFVNDIFERI.A	38.889	11	0.99345	1	1.14166	3.09342e-19
AMGIMNSFVNDIFERI	H2B1M_HUMAN	Q99879	K.AMGIMNSFVNDIFERI.A	38.889	11	0.99345	1	1.14166	3.09342e-19
AMGIMNSFVNDIFERI	H2B1N_HUMAN	Q99877	K.AMGIMNSFVNDIFERI.A	38.889	11	0.99345	1	1.14166	3.09342e-19
AMGIMNSFVNDIFERI	H2B1O_HUMAN	P23527	K.AMGIMNSFVNDIFERI.A	38.889	11	0.99345	1	1.14166	3.09342e-19
AMGIMNSFVNDIFERI	H2B2E_HUMAN	Q16778	K.AMGIMNSFVNDIFERI.A	38.889	11	0.99345	1	1.14166	3.09342e-19
AMGIMNSFVNDIFERI	H2B2F_HUMAN	Q5QNW6	K.AMGIMNSFVNDIFERI.A	38.889	11	0.99345	1	1.14166	3.09342e-19
AMGIMNSFVNDIFERI	H2B3B_HUMAN	Q8N257	K.AMGIMNSFVNDIFERI.A	38.889	11	0.99345	1	1.14166	3.09342e-19
AMGIMNSFVNDIFERI	H2BFS_HUMAN	P57053	K.AMGIMNSFVNDIFERI.A	31.746	10	0.99345	1	1.14166	3.09342e-19
AMTVDREFPEMNLESVTPMTLTTLEGGNLEAK	LCN1_HUMAN	P31025	K.AMTVDREFPEMNLESVTPMTLTTLEGGNLEAK.V	76.136	13	0.99239	1	-0.0661806	1.05393e-21
ANDDIIVNWVNR	PLST_HUMAN	P13797	K.ANDDIIVNWVNR.T	16.984	8	0.99301	1	0.653492	9.65651e-15
ANDTTFGLAAGVFTR	AL9A1_HUMAN	P49189	R.ANDTTFGLAAGVFTR.D	5.466	2	0.99271	1	1.1642	1.86764e-15
ANLQIDQINTDLNLER	MYH9_HUMAN	P35579	K.ANLQIDQINTDLNLER.S	15.357	24	0.99149	1	0.419859	7.8125e-20
ANNHQQQQGLQDSSSK	POF1B_HUMAN	Q8WVV4	R.ANNHQQQQGLQDSSSK.C	13.752	6	0.99318	1	1.51311	7.79223e-19
ANPETLTITVTSR	CLCA4_HUMAN	Q14CN2	K.ANPETLTITVTSR.A	2.612	2	0.99252	1	1.0397	6.82524e-14
ANSSATETINK	DESP_HUMAN	P15924	K.ANSSATETINK.L	49.739	138	0.99123	1	0.00105769	3.2251e-15
ANSSATETINKLK	DESP_HUMAN	P15924	K.ANSSATETINKLK.V	49.739	138	0.99206	1	0.531136	9.02886e-14
ANTFVAELK	MDHM_HUMAN	P40926	R.ANTFVAELK.G	27.219	7	0.99269	1	0.978282	1.5625e-12
ANTLDNQLTNR	SCEL_HUMAN	O95171	K.ANTLDNQLTNR.S	22.384	13	0.99263	1	1.0575	8.39649e-14
APDFVFYAPR	EZRI_HUMAN	P15311	K.APDFVFYAPR.L	26.28	13	0.99297	1	1.03809	9.76563e-15
APDFVFYAPR	MOES_HUMAN	P26038	K.APDFVFYAPR.L	15.598	8	0.99297	1	1.03809	9.76563e-15
APDFVFYAPR	RADI_HUMAN	P35241	K.APDFVFYAPR.L	6.69	4	0.99297	1	1.03809	9.76563e-15
APEPLELTLPVELLADTR	BPIL1_HUMAN	Q8N4F0	R.APEPLELTLPVELLADTR.V	41.266	14	0.99316	1	0.423413	3.90625e-22
APIKVGDAIPAVEVFEGEPGNKVNLAELFK	PRDX5_HUMAN	P30044	M.APIKVGDAIPAVEVFEGEPGNKVNLAELFK.G	39.252	7	0.98924	1	1.05805	8.09832e-19
APLSRPTPLEDLEGR	EVPL_HUMAN	Q92817	R.APLSRPTPLEDLEGR.I	19.97	31	0.99331	1	0.946618	2.50042e-16
APNHAVVTR	TRFE_HUMAN	P02787	R.APNHAVVTR.K	29.37	20	0.99222	1	1.82746	1.95313e-13
APNHAVVTRK	TRFE_HUMAN	P02787	R.APNHAVVTRK.D	29.37	20	0.98964	1	2.1742	9.76563e-15
APNISMPDVDLNLKGPK	AHNK_HUMAN	Q09666	K.APNISMPDVDLNLKGPK.I	19.508	36	0.99374	1	0.769269	1.47956e-18
APNVVVTR	GDIR2_HUMAN	P52566	K.APNVVVTR.L	23.383	4	0.99273	1	1.38456	3.90625e-12
APPGKPQGPPQQEGNNPQ	PRP1_HUMAN	P04280	R.APPGKPQGPPQQEGNNPQ.G	53.571	12	0.9912	1	-0.0531011	1.97119e-19
APPQPFGPGFVPPPPPPPYGPGR	SMR3B_HUMAN	P02814	L.APPQPFGPGFVPPPPPPPYGPGR.I	67.089	19	0.99392	1	0.790158	2.42063e-25
APSTYGGGLSV	K1C14_HUMAN	P02533	R.APSTYGGGLSV.S	60.593	45	0.95593	1	0.11474	2.12671e-14
APSTYGGGLSV	K1C16_HUMAN	P08779	R.APSTYGGGLSV.S	72.304	50	0.95593	1	0.11474	2.12671e-14
APSTYGGGLSVSSR	K1C16_HUMAN	P08779	R.APSTYGGGLSVSSR.F	72.304	50	0.99252	1	0.424174	1.2207e-19
APSTYGGGLSVSSSR	K1C14_HUMAN	P02533	R.APSTYGGGLSVSSSR.F	60.593	45	0.99247	1	0.542013	6.10352e-21
APSWFDTGLSEMR	CRYAB_HUMAN	P02511	R.APSWFDTGLSEMR.L	42.857	5	0.99346	1	1.07022	2.44141e-18
AQAQPGVPLGELGQVVECSLDFGLVCRN	MUC5B_HUMAN	Q7M4S5	R.AQAQPGVPLGELGQVVECSLDFGLVCRN.R	6.265	25	0.9934	1	0.450864	3.84234e-16
AQAQPGVPLR	MUC5B_HUMAN	Q7M4S5	R.AQAQPGVPLR.E	6.265	25	0.99335	1	1.68166	7.8125e-14
AQAQPGVPLRELGQVVECSLDFGLVCRN	MUC5B_HUMAN	Q7M4S5	R.AQAQPGVPLRELGQVVECSLDFGLVCRN.R	6.265	25	0.99214	1	0.226054	1.15858e-15
AQEAEKLLNNVISK	SPLC2_HUMAN	Q96DR5	K.AQEAEKLLNNVISK.L	49.799	15	0.99296	1	0.979267	1.95313e-18
AQFVNWIDSIIQR	ELNE_HUMAN	P08246	V.AQFVNWIDSIIQR.S	28.464	9	0.99257	1	1.55548	8.98487e-16
AQHEDQVEQYKK	LMNA_HUMAN	P02545	R.AQHEDQVEQYKK.E	24.096	14	0.98936	1	0.489107	2.32711e-15
AQIDNLTR	DESP_HUMAN	P15924	R.AQIDNLTR.E	49.739	138	0.99273	1	1.53471	3.125e-11
AQIHDLVLVGGSTR	HSP71_HUMAN	P08107	K.AQIHDLVLVGGSTR.I	43.058	20	0.99353	1	1.2261	1.95313e-18
AQLGGPEAAK	HSPB1_HUMAN	Q9UC36	R.AQLGGPEAAK.S	94.146	23	0.9924	1	0.744925	3.90625e-14
AQLGGPEAAKSDETAAK	HSPB1_HUMAN	Q9UC36	R.AQLGGPEAAKSDETAAK.-	94.146	23	0.99394	1	0.476438	2.98805e-22
AQLNELVNSHGR	EVPL_HUMAN	Q92817	K.AQLNELVNSHGR.S	19.97	31	0.99304	1	0.65655	2.08948e-15
AQPVQVAEGSEPDGFWEALGGK	GELS_HUMAN	P06396	R.AQPVQVAEGSEPDGFWEALGGK.A	20.077	11	0.99247	1	0.653477	1.74865e-21
AQQIHSQTSQQYPLYDLDLGK	DESP_HUMAN	P15924	K.AQQIHSQTSQQYPLYDLDLGK.F	49.739	138	0.99256	1	0.435779	6.28012e-21
AQQIHSQTSQQYPLYDLDLGKFGEK	DESP_HUMAN	P15924	K.AQQIHSQTSQQYPLYDLDLGKFGEK.V	49.739	138	0.99345	1	0.695162	2.09939e-20
AQYEDIAQK	K2C1_HUMAN	P04264	K.AQYEDIAQK.S	66.77	58	0.99364	1	1.14963	1.5625e-12
AQYEEIANR	K2C5_HUMAN	P13647	K.AQYEEIANR.S	65.932	71	0.99391	0.999799	1.53343	7.8125e-13
AQYEEIAQR	K22E_HUMAN	P35908	K.AQYEEIAQR.S	40.845	30	0.99341	1	1.22002	1.5625e-12
AQYEEIAQR	K2C4_HUMAN	P19013	R.AQYEEIAQR.S	74.532	75	0.99341	1	1.22002	1.5625e-12
AQYEEIAQR	K2C6A_HUMAN	P02538	K.AQYEEIAQR.S	70.035	77	0.99341	1	1.22002	1.5625e-12
AQYEEIAQR	K2C6B_HUMAN	P04259	K.AQYEEIAQR.S	68.44	73	0.99341	1	1.22002	1.5625e-12
AQYEEIAQR	K2C6C_HUMAN	P48668	K.AQYEEIAQR.S	67.553	75	0.99341	1	1.22002	1.5625e-12
AREDIFMETLK	ZA2G_HUMAN	P25311	K.AREDIFMETLK.D	43.96	13	0.99244	1	0.783691	1.25299e-12
AREQTFGGVNYFFDVEVGR	CYTS_HUMAN	P01036	R.AREQTFGGVNYFFDVEVGR.T	60.993	15	0.99376	1	0.570855	3.18496e-23
ARFEELNADLFR	HSP72_HUMAN	P54652	R.ARFEELNADLFR.G	17.84	11	0.99187	1	1.40517	4.0625e-16
ARFEELNADLFR	HSP7C_HUMAN	P11142	R.ARFEELNADLFR.G	39.783	24	0.99187	1	1.40517	4.0625e-16
ARPFPDGLAEDIDKGEVSAR	EF2_HUMAN	P13639	K.ARPFPDGLAEDIDKGEVSAR.Q	33.566	23	0.99244	1	1.21728	1.41494e-20
ARPHAWPFMV	ELNE_HUMAN	P08246	R.ARPHAWPFMV.S	28.464	9	0.99252	1	0.849078	5.82994e-12
ARQQTVGGVNYFFDVEVGR	CYTN_HUMAN	P01037	R.ARQQTVGGVNYFFDVEVGR.T	62.411	13	0.99294	1	0.337169	1.77007e-21
ASEHILLATSHTLFLR	PERL_HUMAN	P22079	R.ASEHILLATSHTLFLR.E	32.865	16	0.99394	1	0.674283	4.88281e-21
ASFNHFDKDHGGALGPEEFK	ACTN4_HUMAN	O43707	R.ASFNHFDKDHGGALGPEEFK.A	42.371	27	0.99284	1	1.05394	2.13831e-18
ASGPPVSELITK	H12_HUMAN	P16403	K.ASGPPVSELITK.A	26.291	6	0.99371	1	0.90635	2.44141e-16
ASGPPVSELITK	H13_HUMAN	P16402	K.ASGPPVSELITK.A	25.339	6	0.99371	1	0.90635	2.44141e-16
ASGPPVSELITK	H14_HUMAN	P10412	K.ASGPPVSELITK.A	25.571	6	0.99371	1	0.90635	2.44141e-16
ASGVPDRFSGSGSGTDFTLK	KV201_HUMAN	P01614	R.ASGVPDRFSGSGSGTDFTLK.I	17.391	2	0.99352	1	0.45976	3.34436e-19
ASGVPDRFSGSGSGTDFTLK	KV204_HUMAN	P01617	R.ASGVPDRFSGSGSGTDFTLK.I	17.699	2	0.99352	1	0.45976	3.34436e-19
ASGVPDRFSGSGSGTDFTLK	KV205_HUMAN	P06309	R.ASGVPDRFSGSGSGTDFTLK.I	17.094	2	0.99352	1	0.45976	3.34436e-19
ASHEEVEGLVEK	LG3BP_HUMAN	Q08380	R.ASHEEVEGLVEK.I	23.077	11	0.99338	1	0.989555	4.88281e-17
ASLEGNLAETENR	K1C17_HUMAN	Q8N1P6	K.ASLEGNLAETENR.Y	60.648	30	0.99277	1	0.165756	4.88281e-18
ASLENSLEETK	K1C14_HUMAN	P02533	K.ASLENSLEETK.G	60.593	45	0.99328	1	0.529849	1.95313e-15
ASLENSLEETK	K1C16_HUMAN	P08779	K.ASLENSLEETK.G	72.304	50	0.99328	1	0.529849	1.95313e-15
ASLENSLEETKGR	K1C14_HUMAN	P02533	K.ASLENSLEETKGR.Y	60.593	45	0.99332	1	0.74439	9.76563e-18
ASLENSLEETKGR	K1C16_HUMAN	P08779	K.ASLENSLEETKGR.Y	72.304	50	0.99332	1	0.74439	9.76563e-18
ASNDMYHSR	CYTC_HUMAN	P01034	K.ASNDMYHSR.A	34.247	7	0.98186	1	1.22896	1.95313e-13
ASQSVSSSYLAWYQQKPGQAPR	KV312_HUMAN	P18135	R.ASQSVSSSYLAWYQQKPGQAPR.L	50.388	5	0.99338	1	0.442868	1.23479e-22
ASQSVSSSYLAWYQQKPGQAPR	KV313_HUMAN	P18136	R.ASQSVSSSYLAWYQQKPGQAPR.L	50.388	5	0.99338	1	0.442868	1.23479e-22
ASSIIDELFQDR	CLUS_HUMAN	P10909	R.ASSIIDELFQDR.F	18.931	6	0.99331	1	1.32248	3.90625e-16
ASSLESGVPSR	KV106_HUMAN	P01598	K.ASSLESGVPSR.F	26.852	2	0.99142	1	1.83235	4.43848e-13
ASSLESGVPSR	KV110_HUMAN	P01602	D.ASSLESGVPSR.F	24.786	2	0.99142	1	1.83235	4.43848e-13
ASTPNGYDNGIIWATWK	FIBG_HUMAN	Q9UC63	K.ASTPNGYDNGIIWATWK.T	20.971	7	0.99234	1	0.343704	2.00484e-20
ASVDSGSSEEQGGSSR	PIGR_HUMAN	P01833	R.ASVDSGSSEEQGGSSR.A	27.88	25	0.988	1	1.00004	3.05176e-22
ATAGDTHLGGEDFDNRLV	HS71L_HUMAN	P34931	K.ATAGDTHLGGEDFDNRLV.S	17.941	9	0.99326	1	1.20586	3.72043e-15
ATAGDTHLGGEDFDNRLV	HSP71_HUMAN	P08107	K.ATAGDTHLGGEDFDNRLV.N	43.058	20	0.99326	1	1.20586	3.72043e-15
ATAGDTHLGGEDFDNRLV	HSP76_HUMAN	P17066	K.ATAGDTHLGGEDFDNRLV.N	12.442	7	0.99326	1	1.20586	3.72043e-15
ATAVMPDGQFKDISLSDYK	PRDX1_HUMAN	Q06830	K.ATAVMPDGQFKDISLSDYK.G	48.744	12	0.99323	1	0.960428	6.61026e-21
ATAVVDGAFK	PRDX2_HUMAN	P32119	K.ATAVVDGAFK.E	25.253	5	0.99145	1	0.709347	4.58984e-13
ATAVVDGAFKEVK	PRDX2_HUMAN	P32119	K.ATAVVDGAFKEVK.L	25.253	5	0.85498	1	1.04797	2.48802e-11
ATEDEYYR	CYTS_HUMAN	P01036	K.ATEDEYYR.R	60.993	15	0.99315	1	0.941617	3.90625e-12
ATEDEYYR	CYTT_HUMAN	P09228	K.ATEDEYYR.R	41.135	8	0.99315	1	0.941617	3.90625e-12
ATEDEYYRR	CYTS_HUMAN	P01036	K.ATEDEYYRR.P	60.993	15	0.97437	1	0.568855	4.31445e-12
ATEDEYYRR	CYTT_HUMAN	P09228	K.ATEDEYYRR.L	41.135	8	0.97437	1	0.568855	4.31445e-12
ATEDEYYRRPLQVLR	CYTS_HUMAN	P01036	K.ATEDEYYRRPLQVLR.A	60.993	15	0.89506	1	0.530664	2.3124e-12
ATEGAIHAVEEVVKEVVGHAK	FAM25_HUMAN	Q5VTM1	K.ATEGAIHAVEEVVKEVVGHAK.E	64.045	3	0.99074	1	1.46624	1.31399e-24
ATEHLSTLSEK	APOA1_HUMAN	P02647	K.ATEHLSTLSEK.A	63.296	16	0.99312	1	1.68111	1.95313e-15
ATFLDAWEAMEELVDEGLVK	AK1BA_HUMAN	O60218	K.ATFLDAWEAMEELVDEGLVK.A	24.367	6	0.99311	1	1.21028	9.58734e-22
ATFMVGSYGPRPEEYEFLTPVEEAPK	GDIR2_HUMAN	P52566	K.ATFMVGSYGPRPEEYEFLTPVEEAPK.G	23.383	4	0.99339	1	0.423456	1.93978e-20
ATGGGLSSVGGGSSTI	K2C6B_HUMAN	P04259	R.ATGGGLSSVGGGSSTI.K	68.44	73	0.99076	1	1.00388	1.53267e-16
ATGGGLSSVGGGSSTIK	K2C6B_HUMAN	P04259	R.ATGGGLSSVGGGSSTIK.Y	68.44	73	0.99245	1	0.258724	3.05176e-23
ATGPPVSELITK	H15_HUMAN	P16401	K.ATGPPVSELITK.A	24.336	6	0.98425	1	1.35284	1.38678e-13
ATIGADFLTK	RAB7A_HUMAN	P51149	K.ATIGADFLTK.E	16.425	3	0.98315	1	1.14276	5.73062e-12
ATKDDYYR	CYTN_HUMAN	P01037	K.ATKDDYYR.R	62.411	13	0.99256	1	0.663579	7.8125e-12
ATLENDFVVLK	K2C78_HUMAN	Q8N1N4	R.ATLENDFVVLK.K	44.038	31	0.9931	1	1.46208	3.48157e-15
ATLENDFVVLKK	K2C78_HUMAN	Q8N1N4	R.ATLENDFVVLKK.D	44.038	31	0.99235	1	1.16931	1.95313e-16
ATMQNLNDR	K1C17_HUMAN	Q8N1P6	K.ATMQNLNDR.L	60.648	30	0.99312	1	1.14047	7.8125e-13
ATNYNAGDR	LYSC_HUMAN	P61626	R.ATNYNAGDR.S	27.027	9	0.9933	1	1.71282	1.95313e-13
ATNYNAGDRSTDYGIFQINSR	LYSC_HUMAN	P61626	R.ATNYNAGDRSTDYGIFQINSR.Y	27.027	9	0.99178	1	0.33555	6.53379e-21
ATQALVLAPTR	IF4A1_HUMAN	P60842	K.ATQALVLAPTR.E	21.429	7	0.99237	1	0.656771	9.71088e-11
ATSIVAWLAK	A2ML1_HUMAN	A8K2U0	K.ATSIVAWLAK.Q	27.854	29	0.99356	1	1.14716	3.90625e-14
ATVLNYLPK	A2MG_HUMAN	P01023	K.ATVLNYLPK.C	24.763	26	0.99289	1	1.29237	7.8125e-13
ATVLNYLPK	PZP_HUMAN	P20742	K.ATVLNYLPK.C	3.914	5	0.99289	1	1.29237	7.8125e-13
AVADTRDQADGSR	PIGR_HUMAN	P01833	K.AVADTRDQADGSR.A	27.88	25	0.99172	1	1.63233	8.86691e-14
AVDESVLLLRPDR	A2ML1_HUMAN	A8K2U0	R.AVDESVLLLRPDR.E	27.854	29	0.99251	1	1.49931	1.78545e-13
AVDTWSWGER	LG3BP_HUMAN	Q08380	K.AVDTWSWGER.A	23.077	11	0.99394	1	0.991749	1.39648e-14
AVELAANTK	TKT_HUMAN	P29401	K.AVELAANTK.G	30.337	13	0.99205	1	0.913924	3.90625e-13
AVETAAAHGSKPNVYANR	TGM1_HUMAN	P22735	K.AVETAAAHGSKPNVYANR.G	26.683	16	0.99124	1	0.509129	1.56561e-18
AVEVQGPSLESGDHGK	AHNK_HUMAN	Q09666	R.AVEVQGPSLESGDHGK.I	19.508	36	0.99335	1	1.14789	2.34072e-12
AVFPSIVGR	ACTA_HUMAN	P62736	R.AVFPSIVGR.P	46.154	28	0.99285	1	0.87566	3.90625e-13
AVFPSIVGR	ACTBM_HUMAN	Q9BYX7	Q.AVFPSIVGR.P	24	15	0.99285	1	0.87566	3.90625e-13
AVFPSIVGR	ACTB_HUMAN	Q96HG5	R.AVFPSIVGR.P	80.8	48	0.99285	1	0.87566	3.90625e-13
AVFPSIVGR	ACTC_HUMAN	P68032	R.AVFPSIVGR.P	48.806	32	0.99285	1	0.87566	3.90625e-13
AVFPSIVGR	ACTG_HUMAN	P63261	R.AVFPSIVGR.P	80.8	48	0.99285	1	0.87566	3.90625e-13
AVFPSIVGR	ACTH_HUMAN	P63267	R.AVFPSIVGR.P	46.277	28	0.99285	1	0.87566	3.90625e-13
AVFPSIVGR	ACTS_HUMAN	P68133	R.AVFPSIVGR.P	45.093	30	0.99285	1	0.87566	3.90625e-13
AVFPSIVGR	POTEE_HUMAN	Q6S8J3	R.AVFPSIVGR.P	12.186	18	0.99285	1	0.87566	3.90625e-13
AVFPSIVGR	POTEF_HUMAN	A5A3E0	R.AVFPSIVGR.P	10.512	17	0.99285	1	0.87566	3.90625e-13
AVFPSIVGRPR	ACTA_HUMAN	P62736	R.AVFPSIVGRPR.H	46.154	28	0.99314	1	1.15288	9.76563e-16
AVFPSIVGRPR	ACTBM_HUMAN	Q9BYX7	Q.AVFPSIVGRPR.H	24	15	0.99314	1	1.15288	9.76563e-16
AVFPSIVGRPR	ACTB_HUMAN	Q96HG5	R.AVFPSIVGRPR.H	80.8	48	0.99314	1	1.15288	9.76563e-16
AVFPSIVGRPR	ACTC_HUMAN	P68032	R.AVFPSIVGRPR.H	48.806	32	0.99314	1	1.15288	9.76563e-16
AVFPSIVGRPR	ACTG_HUMAN	P63261	R.AVFPSIVGRPR.H	80.8	48	0.99314	1	1.15288	9.76563e-16
AVFPSIVGRPR	ACTH_HUMAN	P63267	R.AVFPSIVGRPR.H	46.277	28	0.99314	1	1.15288	9.76563e-16
AVFPSIVGRPR	ACTS_HUMAN	P68133	R.AVFPSIVGRPR.H	45.093	30	0.99314	1	1.15288	9.76563e-16
AVFPSIVGRPR	POTEE_HUMAN	Q6S8J3	R.AVFPSIVGRPR.Q	12.186	18	0.99314	1	1.15288	9.76563e-16
AVFPSIVGRPR	POTEF_HUMAN	A5A3E0	R.AVFPSIVGRPR.Q	10.512	17	0.99314	1	1.15288	9.76563e-16
AVFQKENEER	ISK5_HUMAN	Q9NQ38	K.AVFQKENEER.K	4.229	4	0.93564	1	0.718239	5.17929e-12
AVFVDLEPTVIDEIR	TBA4A_HUMAN	P68366	R.AVFVDLEPTVIDEIR.N	34.598	13	0.99348	1	0.24042	1.01754e-16
AVFVDLEPTVIDEVR	TBA1A_HUMAN	Q71U36	R.AVFVDLEPTVIDEVR.T	37.694	14	0.99376	1	0.271974	3.71781e-16
AVFVDLEPTVIDEVR	TBA1B_HUMAN	P68363	R.AVFVDLEPTVIDEVR.T	40.798	15	0.99376	1	0.271974	3.71781e-16
AVFVDLEPTVIDEVR	TBA1C_HUMAN	Q9BQE3	R.AVFVDLEPTVIDEVR.T	40.98	15	0.99376	1	0.271974	3.71781e-16
AVGFLEIGYQK	A2ML1_HUMAN	A8K2U0	R.AVGFLEIGYQK.E	27.854	29	0.99307	1	1.03371	3.90625e-15
AVIDEIFQGLDANQDEQVDFQEFISLVAIALK	S10AC_HUMAN	P80511	K.AVIDEIFQGLDANQDEQVDFQEFISLVAIALK.A	57.609	3	0.99258	1	1.34409	1.42224e-24
AVINSAGYK	NIBL1_HUMAN	Q96TA1	R.AVINSAGYK.I	12.824	6	0.98569	1	1.10918	7.8125e-13
AVIVLVENFYK	S10AG_HUMAN	Q96FQ6	K.AVIVLVENFYK.Y	67.961	9	0.99252	1	0.980341	2.53906e-15
AVLEKTDEPGKYTADGGK	LCN1_HUMAN	P31025	K.AVLEKTDEPGKYTADGGK.H	76.136	13	0.99323	1	1.6622	1.88631e-18
AVLEKTDEPGKYTADGGKHVAYIIR	LCN1_HUMAN	P31025	K.AVLEKTDEPGKYTADGGKHVAYIIR.S	76.136	13	0.99378	1	1.2661	1.71997e-23
AVLEYLTAEILELAGNAAR	H2A1B_HUMAN	P04908	A.AVLEYLTAEILELAGNAAR.D	57.692	14	0.99295	1	1.51843	3.745e-18
AVLEYLTAEILELAGNAAR	H2A1C_HUMAN	Q93077	A.AVLEYLTAEILELAGNAAR.D	63.077	15	0.99295	1	1.51843	3.745e-18
AVLEYLTAEILELAGNAAR	H2A1D_HUMAN	P20671	A.AVLEYLTAEILELAGNAAR.D	57.692	14	0.99295	1	1.51843	3.745e-18
AVLEYLTAEILELAGNAAR	H2A1H_HUMAN	Q96KK5	A.AVLEYLTAEILELAGNAAR.D	64.062	15	0.99295	1	1.51843	3.745e-18
AVLEYLTAEILELAGNAAR	H2A1J_HUMAN	Q99878	A.AVLEYLTAEILELAGNAAR.D	64.062	15	0.99295	1	1.51843	3.745e-18
AVLEYLTAEILELAGNAAR	H2A1_HUMAN	P0C0S8	A.AVLEYLTAEILELAGNAAR.D	63.077	15	0.99295	1	1.51843	3.745e-18
AVLEYLTAEILELAGNAAR	H2A2A_HUMAN	Q6FI13	A.AVLEYLTAEILELAGNAAR.D	63.077	16	0.99295	1	1.51843	3.745e-18
AVLEYLTAEILELAGNAAR	H2A2B_HUMAN	Q8IUE6	A.AVLEYLTAEILELAGNAAR.D	49.231	12	0.99295	1	1.51843	3.745e-18
AVLEYLTAEILELAGNAAR	H2A2C_HUMAN	Q16777	A.AVLEYLTAEILELAGNAAR.D	63.566	16	0.99295	1	1.51843	3.745e-18
AVLEYLTAEILELAGNAAR	H2A3_HUMAN	Q7L7L0	A.AVLEYLTAEILELAGNAAR.D	57.692	14	0.99295	1	1.51843	3.745e-18
AVLEYLTAEILELAGNAAR	H2AJ_HUMAN	Q9BTM1	A.AVLEYLTAEILELAGNAAR.D	63.566	15	0.99295	1	1.51843	3.745e-18
AVLEYLTAEILELAGNAAR	H2AX_HUMAN	P16104	A.AVLEYLTAEILELAGNAAR.D	39.86	11	0.99295	1	1.51843	3.745e-18
AVLEYLTAEILELAGNAAR	H2AY_HUMAN	O75367	A.AVLEYLTAEILELAGNAAR.D	5.914	9	0.99295	1	1.51843	3.745e-18
AVLVDLEPGTMDSVR	TBB8_HUMAN	Q3ZCM7	R.AVLVDLEPGTMDSVR.S	13.063	6	0.99278	1	0.446211	1.25421e-14
AVMDDFAAFVEK	ALBU_HUMAN	Q9P157	K.AVMDDFAAFVEK.C	41.544	47	0.99331	1	0.614701	2.44141e-17
AVQGFHTGVHQAGK	SBSN_HUMAN	Q6UWP8	K.AVQGFHTGVHQAGK.E	46.964	9	0.99205	1	1.56338	1.70103e-16
AVSALGNAYFGSGSGPITLDDVECSGTESTLWQCRN	DMBT1_HUMAN	Q9Y4V9	R.AVSALGNAYFGSGSGPITLDDVECSGTESTLWQCRN.R	14.463	9	0.99143	1	0.569254	7.01232e-18
AVSNEIVRFPTDQLTPDQER	PERM_HUMAN	P05164	R.AVSNEIVRFPTDQLTPDQER.S	29.396	23	0.9932	1	0.421709	3.28638e-21
AVTDKFLSAIVSSVDKIPYGMR	IQGA1_HUMAN	P46940	R.AVTDKFLSAIVSSVDKIPYGMR.F	8.69	9	0.99229	1	1.80488	1.76507e-14
AVTEQGHELSNEER	1433B_HUMAN	P31946	K.AVTEQGHELSNEER.N	36.179	8	0.99305	1	0.778102	4.88281e-19
AVTGYNDPETGNIISLFQAMNK	DESP_HUMAN	P15924	R.AVTGYNDPETGNIISLFQAMNK.E	49.739	138	0.99276	1	1.75933	2.97237e-23
AVTKYTSSK	H2B1A_HUMAN	Q96A08	K.AVTKYTSSK.-	25.984	7	0.99147	1	1.92369	3.90625e-13
AVTKYTSSK	H2B1B_HUMAN	P33778	K.AVTKYTSSK.-	38.889	11	0.99147	1	1.92369	3.90625e-13
AVTKYTSSK	H2B1C_HUMAN	P62807	K.AVTKYTSSK.-	38.889	11	0.99147	1	1.92369	3.90625e-13
AVTKYTSSK	H2B1D_HUMAN	P58876	K.AVTKYTSSK.-	38.889	11	0.99147	1	1.92369	3.90625e-13
AVTKYTSSK	H2B1H_HUMAN	Q93079	K.AVTKYTSSK.-	38.889	11	0.99147	1	1.92369	3.90625e-13
AVTKYTSSK	H2B1L_HUMAN	Q99880	K.AVTKYTSSK.-	38.889	11	0.99147	1	1.92369	3.90625e-13
AVTKYTSSK	H2B1M_HUMAN	Q99879	K.AVTKYTSSK.-	38.889	11	0.99147	1	1.92369	3.90625e-13
AVTKYTSSK	H2B1N_HUMAN	Q99877	K.AVTKYTSSK.-	38.889	11	0.99147	1	1.92369	3.90625e-13
AVTKYTSSK	H2B1O_HUMAN	P23527	K.AVTKYTSSK.-	38.889	11	0.99147	1	1.92369	3.90625e-13
AVTKYTSSK	H2B2E_HUMAN	Q16778	K.AVTKYTSSK.-	38.889	11	0.99147	1	1.92369	3.90625e-13
AVTKYTSSK	H2B2F_HUMAN	Q5QNW6	K.AVTKYTSSK.-	38.889	11	0.99147	1	1.92369	3.90625e-13
AVTKYTSSK	H2B3B_HUMAN	Q8N257	K.AVTKYTSSK.-	38.889	11	0.99147	1	1.92369	3.90625e-13
AVTLSLDGGDTAIR	MUC5B_HUMAN	Q7M4S5	K.AVTLSLDGGDTAIR.V	6.265	25	0.9933	1	0.842887	5.85938e-18
AVVGDAQYHHFR	LEG7_HUMAN	P47929	K.AVVGDAQYHHFR.H	56.618	11	0.9933	1	1.71304	4.88281e-17
AWGPGLEGGVVGK	FLNA_HUMAN	P21333	R.AWGPGLEGGVVGK.S	1.964	4	0.99295	1	1.76952	4.37879e-15
AWGVDLASVEQHINSHR	DESP_HUMAN	P15924	V.AWGVDLASVEQHINSHR.G	49.739	138	0.99256	1	1.37022	3.79324e-17
AYFHLLNQIAPK	PLSI_HUMAN	Q14651	R.AYFHLLNQIAPK.G	4.134	2	0.99387	1	0.851407	1.38183e-14
AYFHLLNQIAPK	PLST_HUMAN	P13797	K.AYFHLLNQIAPK.G	16.984	8	0.99387	1	0.851407	1.38183e-14
AYIFIDEAHITQALIWLSQR	A2MG_HUMAN	P01023	R.AYIFIDEAHITQALIWLSQR.Q	24.763	26	0.99199	1	0.879124	6.90013e-19
AYLPVNESFGFTADLR	EF2_HUMAN	P13639	K.AYLPVNESFGFTADLR.S	33.566	23	0.99331	0.865469	0.519487	6.10352e-22
AYTEVAAAQQQLLQQLEFAR	EVPL_HUMAN	Q92817	K.AYTEVAAAQQQLLQQLEFAR.K	19.97	31	0.99295	1	1.44921	8.82851e-19
AYTNFDAER	ANXA2_HUMAN	P07355	K.AYTNFDAER.D	53.097	24	0.9922	1	0.653537	3.125e-13
AYTNFDAER	AXA2L_HUMAN	A6NMY6	K.AYTNFDAER.D	41.003	18	0.9922	1	0.653537	3.125e-13
AYTNFDAERDALNIETAIK	ANXA2_HUMAN	P07355	K.AYTNFDAERDALNIETAIK.T	53.097	24	0.99266	1	1.0886	2.0415e-17
AYTNFDAERDALNIETAIK	AXA2L_HUMAN	A6NMY6	K.AYTNFDAERDALNIETAIK.T	41.003	18	0.99266	1	1.0886	2.0415e-17
AYTNFDAERDALNIETAIKTK	ANXA2_HUMAN	P07355	K.AYTNFDAERDALNIETAIKTK.G	53.097	24	0.99261	1	1.68555	6.18991e-17
AYTNFDAERDALNIETAIKTK	AXA2L_HUMAN	A6NMY6	K.AYTNFDAERDALNIETAIKTK.G	41.003	18	0.99261	1	1.68555	6.18991e-17
DAATDVASR	TGM3_HUMAN	Q08188	R.DAATDVASR.N	58.297	45	0.99353	1	0.545982	1.95313e-13
DAEAWFNEK	K1C10_HUMAN	P13645	K.DAEAWFNEK.S	52.74	27	0.99286	1	0.871822	2.07031e-13
DAEAWFNEK	K1C25_HUMAN	Q7Z3Z0	R.DAEAWFNEK.S	4	2	0.99286	1	0.871822	2.07031e-13
DAEAWFNEK	K1C27_HUMAN	Q7Z3Y8	R.DAEAWFNEK.S	6.318	3	0.99286	1	0.871822	2.07031e-13
DAEAWFNEK	K1C28_HUMAN	Q7Z3Y7	K.DAEAWFNEK.S	3.879	2	0.99286	1	0.871822	2.07031e-13
DAEDWFFSK	K1C17_HUMAN	Q8N1P6	K.DAEDWFFSK.T	60.648	30	0.99315	1	1.06123	2.05078e-13
DAEDWFFSKTEELNR	K1C17_HUMAN	Q8N1P6	K.DAEDWFFSKTEELNR.E	60.648	30	0.99247	1	1.53538	1.2207e-20
DAEEWFFTK	K1C14_HUMAN	P02533	K.DAEEWFFTK.T	60.593	45	0.99232	1	1.18641	2.14844e-13
DAEEWFFTKTEELNR	K1C14_HUMAN	P02533	K.DAEEWFFTKTEELNR.E	60.593	45	0.99297	1	1.03293	1.34583e-20
DAEEWFFTKTEELNREVATNSELVQSGK	K1C14_HUMAN	P02533	K.DAEEWFFTKTEELNREVATNSELVQSGK.S	60.593	45	0.99168	1	0.195882	3.24264e-29
DAETWFLSK	K1C16_HUMAN	P08779	R.DAETWFLSK.T	72.304	50	0.99225	1	1.08341	3.90625e-13
DAETWFLSKTEELNK	K1C16_HUMAN	P08779	R.DAETWFLSKTEELNK.E	72.304	50	0.97864	1	-0.352289	1.3531e-16
DAFDRNPELQNLLLDDFFK	6PGD_HUMAN	P52209	K.DAFDRNPELQNLLLDDFFK.S	41.615	17	0.99217	1	1.8562	2.93535e-18
DAGTIAGLNVLR	HSP7C_HUMAN	P11142	K.DAGTIAGLNVLR.I	39.783	24	0.9938	1	1.2639	2.72461e-15
DAGTIAGLNVMR	GRP78_HUMAN	P11021	K.DAGTIAGLNVMR.I	25.994	13	0.99205	1	1.32218	2.49024e-15
DAGVIAGLNVLR	HS71L_HUMAN	P34931	K.DAGVIAGLNVLR.I	17.941	9	0.99349	1	1.23817	3.41797e-16
DAGVIAGLNVLR	HSP71_HUMAN	P08107	K.DAGVIAGLNVLR.I	43.058	20	0.99349	1	1.23817	3.41797e-16
DAHSKRVELEAALQQAKEELAR	K2C4_HUMAN	P19013	K.DAHSKRVELEAALQQAKEELAR.M	74.532	75	0.99087	1	0.852	4.77453e-18
DALNIETAIK	ANXA2_HUMAN	P07355	R.DALNIETAIK.T	53.097	24	0.9934	1	1.24444	3.36328e-12
DALNIETAIK	AXA2L_HUMAN	A6NMY6	R.DALNIETAIK.T	41.003	18	0.9934	1	1.24444	3.36328e-12
DALVLTPASLWKPSSPVSQ	LPLC1_HUMAN	Q9H4V6	K.DALVLTPASLWKPSSPVSQ.-	45.041	20	0.99188	1	-0.0586446	4.09273e-18
DAPEEEDHVLVLR	PDIA1_HUMAN	P07237	A.DAPEEEDHVLVLR.K	48.819	20	0.99307	1	1.05336	1.24911e-14
DAQAKVDELEAALR	K2C78_HUMAN	Q8N1N4	K.DAQAKVDELEAALR.M	44.038	31	0.99003	1	1.29003	3.07409e-16
DASGATFTWTPSSGK	IGHA2_HUMAN	P01877	R.DASGATFTWTPSSGK.S	36.176	13	0.99266	1	0.273337	3.05176e-21
DASGVTFTWTPSSGK	IGHA1_HUMAN	P01876	R.DASGVTFTWTPSSGK.S	44.476	16	0.99315	1	0.0685839	3.05176e-21
DASMVYGSEEPLAR	PERM_HUMAN	P05164	V.DASMVYGSEEPLAR.N	29.396	23	0.99265	1	1.03164	1.16211e-15
DATNVGDEGGFAPNILENKEGLELLK	ENOA_HUMAN	Q6GMP2	K.DATNVGDEGGFAPNILENKEGLELLK.T	64.977	24	0.99296	1	0.563709	1.15234e-23
DAVTYTEHAK	H4_HUMAN	P62805	R.DAVTYTEHAK.R	52.427	12	0.9933	1	0.328177	9.76563e-15
DDGLFSGDPNWFPK	TAGL2_HUMAN	P37802	R.DDGLFSGDPNWFPK.K	39.698	7	0.99246	1	0.776804	3.21754e-15
DDGLFSGDPNWFPKK	TAGL2_HUMAN	P37802	R.DDGLFSGDPNWFPKK.S	39.698	7	0.99272	1	1.53066	3.69478e-13
DDNPNLPR	ALBU_HUMAN	Q9P157	K.DDNPNLPR.L	41.544	47	0.99197	1	1.13727	9.00391e-12
DEATIIDILTKR	ANXA1_HUMAN	P04083	V.DEATIIDILTKR.N	67.052	42	0.99286	1	1.03853	7.16309e-14
DEFKPLVEEPQNLIK	ALBU_HUMAN	Q9P157	F.DEFKPLVEEPQNLIK.Q	41.544	47	0.99325	1	1.58525	6.00496e-16
DFDFVPPVVR	CO3_HUMAN	P01024	K.DFDFVPPVVR.W	20.204	22	0.99277	1	1.23141	1.17188e-13
DFFLANASR	CAN1_HUMAN	P07384	R.DFFLANASR.A	16.807	9	0.99147	1	1.20365	3.08115e-11
DFHINLFQVLPWLK	CFAB_HUMAN	Q9BX92	R.DFHINLFQVLPWLK.E	1.832	2	0.99084	1	1.73259	1.54775e-15
DFLAGGIAAAISK	ADT3_HUMAN	P12236	K.DFLAGGIAAAISK.T	14.43	4	0.98811	0.997617	1.55442	4.07227e-15
DFLAGGVAAAISK	ADT2_HUMAN	P05141	K.DFLAGGVAAAISK.T	14.43	4	0.99393	1	1.36092	9.76563e-18
DFNVGDYIQAVLDR	PYGL_HUMAN	P06737	R.DFNVGDYIQAVLDR.N	6.139	4	0.99317	1	1.68981	5.61728e-16
DFPAVPYSGWDFNDGK	AMY1_HUMAN	P04745	R.DFPAVPYSGWDFNDGK.C	65.362	60	0.99244	1	-0.0411292	2.68555e-21
DFPAVPYSGWDFNDGK	AMY2B_HUMAN	P19961	R.DFPAVPYSGWDFNDGK.C	53.816	42	0.99244	1	-0.0411292	2.68555e-21
DFPAVPYSGWDFNDGK	AMYP_HUMAN	P04746	R.DFPAVPYSGWDFNDGK.C	45.597	37	0.99244	1	-0.0411292	2.68555e-21
DGAGDVAFIR	TRFL_HUMAN	Q8TCD2	R.DGAGDVAFIR.E	34.085	34	0.99301	1	0.866304	1.95313e-14
DGAGDVAFVK	TRFE_HUMAN	P02787	K.DGAGDVAFVK.H	29.37	20	0.9926	1	0.755922	9.76563e-15
DGAGFLINLIDSPGHVDFSSEVTAALR	EF2_HUMAN	P13639	K.DGAGFLINLIDSPGHVDFSSEVTAALR.V	33.566	23	0.99269	1	0.48893	6.00763e-19
DGFFGNPR	IGHM_HUMAN	P01871	R.DGFFGNPR.K	19.027	7	0.99304	1	0.81967	3.90625e-12
DGFFGNPR	MUCB_HUMAN	P04220	R.DGFFGNPR.K	15.857	5	0.99304	1	0.81967	3.90625e-12
DGGDSEQFIDEER	PRPC_HUMAN	P02810	S.DGGDSEQFIDEER.Q	51.807	18	0.99266	1	0.990434	4.88281e-17
DGGIDPLVR	PERL_HUMAN	P22079	K.DGGIDPLVR.G	32.865	16	0.99286	1	1.34461	7.8125e-13
DGLAFNALIHR	ACTN4_HUMAN	O43707	K.DGLAFNALIHR.H	42.371	27	0.9938	1	1.33586	5.2832e-14
DGNGNTWLTAFVTK	A2ML1_HUMAN	A8K2U0	R.DGNGNTWLTAFVTK.C	27.854	29	0.99296	1	1.17637	7.56836e-19
DGSFSVVITGLR	PIGR_HUMAN	P01833	K.DGSFSVVITGLR.K	27.88	25	0.99332	1	1.31635	1.95313e-16
DGVVEITGK	HSPB1_HUMAN	Q9UC36	K.DGVVEITGK.H	94.146	23	0.99256	1	0.833618	3.90625e-13
DGVVEITGKHEER	HSPB1_HUMAN	Q9UC36	K.DGVVEITGKHEER.Q	94.146	23	0.99389	1	0.759812	2.14844e-16
DGVVEITGKHEERQDEHGYISR	HSPB1_HUMAN	Q9UC36	K.DGVVEITGKHEERQDEHGYISR.C	94.146	23	0.99342	1	1.18634	2.89728e-18
DHGQPGYNSWR	PERL_HUMAN	P22079	R.DHGQPGYNSWR.A	32.865	16	0.99279	1	1.21263	1.5625e-15
DHQLLEPIRDFEAR	TRI29_HUMAN	Q14134	R.DHQLLEPIRDFEAR.K	14.116	8	0.99272	0.999939	0.71311	2.13477e-13
DHYIFYCEGELHGKPVRG	LCN1_HUMAN	P31025	K.DHYIFYCEGELHGKPVRG.V	76.136	13	0.90664	1	1.61572	4.50192e-11
DIAPTLTLYVGK	HPTR_HUMAN	P00739	K.DIAPTLTLYVGK.K	8.621	4	0.99223	1	0.566168	1.56653e-14
DIAPTLTLYVGK	HPT_HUMAN	P00738	K.DIAPTLTLYVGK.K	18.966	10	0.99223	1	0.566168	1.56653e-14
DIAPTLTLYVGKK	HPTR_HUMAN	P00739	K.DIAPTLTLYVGKK.Q	8.621	4	0.99311	1	1.07122	2.92969e-17
DIAPTLTLYVGKK	HPT_HUMAN	P00738	K.DIAPTLTLYVGKK.Q	18.966	10	0.99311	1	1.07122	2.92969e-17
DIILDNPTLTLEVLNEAR	TGM3_HUMAN	Q08188	R.DIILDNPTLTLEVLNEAR.V	58.297	45	0.99196	1	0.72558	4.30298e-23
DIQMTQSPSTLSASVGDR	KV106_HUMAN	P01598	-.DIQMTQSPSTLSASVGDR.V	26.852	2	0.99273	1	0.301074	6.25611e-24
DIQMTQSPSTLSASVGDR	KV110_HUMAN	P01602	C.DIQMTQSPSTLSASVGDR.V	24.786	2	0.99273	1	0.301074	6.25611e-24
DISLSDYK	PRDX1_HUMAN	Q06830	K.DISLSDYK.G	48.744	12	0.98948	1	0.810789	1.5625e-11
DISQAYYTVYKK	ANXA3_HUMAN	P12429	K.DISQAYYTVYKK.S	31.579	8	0.99203	1	1.60102	4.92725e-16
DITSDTSGDFR	ANXA1_HUMAN	P04083	K.DITSDTSGDFR.N	67.052	42	0.99359	1	0.503412	9.76563e-16
DITSDTSGDFRNALLSLAK	ANXA1_HUMAN	P04083	K.DITSDTSGDFRNALLSLAK.G	67.052	42	0.99281	1	0.810174	7.78939e-21
DITYFIQQLLR	ARP3_HUMAN	P61158	R.DITYFIQQLLR.D	10.766	4	0.99285	1	1.52381	3.125e-14
DIVMTQSPDSLAVSLGER	KV401_HUMAN	P06312	G.DIVMTQSPDSLAVSLGER.A	46.281	4	0.9932	1	0.546597	2.8215e-20
DIVMTQSPDSLAVSLGER	KV402_HUMAN	P01625	-.DIVMTQSPDSLAVSLGER.A	49.123	4	0.9932	1	0.546597	2.8215e-20
DIVMTQSPDSLAVSLGER	KV403_HUMAN	P06313	G.DIVMTQSPDSLAVSLGER.A	42.105	4	0.9932	1	0.546597	2.8215e-20
DIVMTQSPDSLAVSLGER	KV404_HUMAN	P06314	G.DIVMTQSPDSLAVSLGER.A	41.791	4	0.9932	1	0.546597	2.8215e-20
DIWMGGVSEPLKR	PERM_HUMAN	P05164	I.DIWMGGVSEPLKR.K	29.396	23	0.9924	1	1.03191	2.92969e-16
DKILTATIENNR	K1C13_HUMAN	P13646	R.DKILTATIENNR.V	69.869	59	0.99264	1	0.867065	3.90625e-16
DKILTATIENNRVILEIDNAR	K1C13_HUMAN	P13646	R.DKILTATIENNRVILEIDNAR.L	69.869	59	0.99232	1	0.909092	1.43265e-18
DKNEDKKIDFSEFLSLLGDIATDYHK	S10A7_HUMAN	P31151	K.DKNEDKKIDFSEFLSLLGDIATDYHK.Q	49.505	9	0.99231	1	1.86265	1.27478e-19
DLADELALVDVIEDK	LDHA_HUMAN	P00338	K.DLADELALVDVIEDK.L	29.217	10	0.99269	1	0.744547	9.10279e-18
DLADELALVDVIEDKLK	LDHA_HUMAN	P00338	K.DLADELALVDVIEDKLK.G	29.217	10	0.91154	1	2.20814	9.70491e-12
DLADELALVDVIEDKLKGEMMDLQHGSLFLR	LDHA_HUMAN	P00338	K.DLADELALVDVIEDKLKGEMMDLQHGSLFLR.T	29.217	10	0.99276	1	1.22361	3.60586e-20
DLAKDITSDTSGDFR	ANXA1_HUMAN	P04083	R.DLAKDITSDTSGDFR.N	67.052	42	0.99251	1	0.919398	2.44141e-20
DLAKDITSDTSGDFRNALLSLAK	ANXA1_HUMAN	P04083	R.DLAKDITSDTSGDFRNALLSLAK.G	67.052	42	0.9925	1	1.54196	3.81923e-18
DLATVYVDVLK	APOA1_HUMAN	P02647	K.DLATVYVDVLK.D	63.296	16	0.99305	1	1.25474	1.95313e-15
DLGEELEALKTELEDTLDSTAAQQELR	MYH9_HUMAN	P35579	R.DLGEELEALKTELEDTLDSTAAQQELR.S	15.357	24	0.99333	1	0.674629	5.05681e-25
DLGEENFK	ALBU_HUMAN	Q9P157	K.DLGEENFK.A	41.544	47	0.99261	1	1.41714	7.8125e-12
DLGTESQIFISR	GDIB_HUMAN	P50395	K.DLGTESQIFISR.T	19.101	7	0.99341	1	1.48077	1.74686e-13
DLIDFDDR	DESP_HUMAN	P15924	R.DLIDFDDR.Q	49.739	138	0.98764	1	1.3541	1.5625e-11
DLIDFDDRQQIYAAEK	DESP_HUMAN	P15924	R.DLIDFDDRQQIYAAEK.A	49.739	138	0.99295	1	1.51346	1.52211e-17
DLISHDEMFSDIYK	TCTP_HUMAN	P13693	R.DLISHDEMFSDIYK.I	13.953	2	0.99273	1	1.37103	1.0898e-18
DLKDEIVR	DESP_HUMAN	P15924	R.DLKDEIVR.L	49.739	138	0.71425	1	0.550003	3.125e-11
DLLDDLKSELTGKFEK	ANXA5_HUMAN	P08758	R.DLLDDLKSELTGKFEK.L	17.188	4	0.99311	1	1.50511	1.14096e-15
DLLFKDSAHGFLK	TRFE_HUMAN	P02787	K.DLLFKDSAHGFLK.V	29.37	20	0.98559	1	0.992688	1.00407e-15
DLLFKDSAIGFSR	TRFL_HUMAN	Q8TCD2	K.DLLFKDSAIGFSR.V	34.085	34	0.99298	1	1.38659	2.92969e-17
DLQGRDEQSEEKKK	MYH9_HUMAN	P35579	R.DLQGRDEQSEEKKK.Q	15.357	24	0.99289	1	2.02377	3.30789e-13
DLQNFLKKENKNEK	S10A9_HUMAN	P06702	K.DLQNFLKKENKNEK.V	90.351	13	0.98476	1	1.08098	2.45427e-12
DLSFKDTQLKEYEELLASVR	POF1B_HUMAN	Q8WVV4	K.DLSFKDTQLKEYEELLASVR.A	13.752	6	0.99325	1	1.34221	2.3827e-19
DLSMIVLLPNEIDGLQKLEEK	SPB3_HUMAN	Q8IXI3	K.DLSMIVLLPNEIDGLQKLEEK.L	42.821	15	0.99285	1	1.13455	1.56795e-14
DLSMIVLLPNEIDGLQKLEEK	SPB4_HUMAN	P48594	K.DLSMIVLLPNEIDGLQKLEEK.L	27.179	10	0.99285	1	1.13455	1.56795e-14
DLTDYLMK	ACTA_HUMAN	P62736	R.DLTDYLMK.I	46.154	28	0.99351	1	1.06378	1.5625e-11
DLTDYLMK	ACTBL_HUMAN	Q562R1	R.DLTDYLMK.I	28.457	15	0.99351	1	1.06378	1.5625e-11
DLTDYLMK	ACTB_HUMAN	Q96HG5	R.DLTDYLMK.I	80.8	48	0.99351	1	1.06378	1.5625e-11
DLTDYLMK	ACTC_HUMAN	P68032	R.DLTDYLMK.I	48.806	32	0.99351	1	1.06378	1.5625e-11
DLTDYLMK	ACTG_HUMAN	P63261	R.DLTDYLMK.I	80.8	48	0.99351	1	1.06378	1.5625e-11
DLTDYLMK	ACTH_HUMAN	P63267	R.DLTDYLMK.I	46.277	28	0.99351	1	1.06378	1.5625e-11
DLTDYLMK	ACTS_HUMAN	P68133	R.DLTDYLMK.I	45.093	30	0.99351	1	1.06378	1.5625e-11
DLTEFQTNLVPYPR	TBA1A_HUMAN	Q71U36	V.DLTEFQTNLVPYPR.I	37.694	14	0.99248	1	0.879273	1.62367e-12
DLTEFQTNLVPYPR	TBA1B_HUMAN	P68363	V.DLTEFQTNLVPYPR.I	40.798	15	0.99248	1	0.879273	1.62367e-12
DLTEFQTNLVPYPR	TBA1C_HUMAN	Q9BQE3	V.DLTEFQTNLVPYPR.I	40.98	15	0.99248	1	0.879273	1.62367e-12
DLTEFQTNLVPYPR	TBA3C_HUMAN	Q13748	V.DLTEFQTNLVPYPR.I	32.444	12	0.99248	1	0.879273	1.62367e-12
DLTEFQTNLVPYPR	TBA3E_HUMAN	Q6PEY2	V.DLTEFQTNLVPYPR.I	26.222	9	0.99248	1	0.879273	1.62367e-12
DLTEFQTNLVPYPR	TBA4A_HUMAN	P68366	V.DLTEFQTNLVPYPR.I	34.598	13	0.99248	1	0.879273	1.62367e-12
DLTEFQTNLVPYPR	TBA8_HUMAN	Q9NY65	V.DLTEFQTNLVPYPR.I	23.608	9	0.99248	1	0.879273	1.62367e-12
DLVTTLGGALLWLSGHAGTQAQGAAR	TYPH_HUMAN	P19971	R.DLVTTLGGALLWLSGHAGTQAQGAAR.V	8.506	2	0.98896	1	1.59323	1.65876e-16
DLYANTVLSGGTTMYPGIADR	ACTB_HUMAN	Q96HG5	K.DLYANTVLSGGTTMYPGIADR.M	80.8	48	0.99085	1	0.0300353	4.6846e-20
DLYANTVLSGGTTMYPGIADR	ACTG_HUMAN	P63261	K.DLYANTVLSGGTTMYPGIADR.M	80.8	48	0.99085	1	0.0300353	4.6846e-20
DLYDAGVKR	ANXA2_HUMAN	P07355	R.DLYDAGVKR.K	53.097	24	0.99224	0.997398	1.63925	7.8125e-13
DLYDAGVKR	AXA2L_HUMAN	A6NMY6	Q.DLYDAGVKR.K	41.003	18	0.99224	0.997398	1.63925	7.8125e-13
DMMSEIDRDGNGTVDFPEFLGMMAR	CALL3_HUMAN	P27482	R.DMMSEIDRDGNGTVDFPEFLGMMAR.K	43.624	4	0.9927	1	0.940309	1.66443e-21
DMYSFLEDMGLK	A2MG_HUMAN	P01023	K.DMYSFLEDMGLK.A	24.763	26	0.99145	1	1.9259	2.44141e-16
DNENVVNEYSSELEK	FIBB_HUMAN	P02675	K.DNENVVNEYSSELEK.H	26.477	10	0.99228	1	0.326285	4.2294e-19
DNIQGITKPAIR	H4_HUMAN	P62805	R.DNIQGITKPAIR.R	52.427	12	0.99297	1	1.31036	9.72852e-15
DNLSSWLEHLPR	EVPL_HUMAN	Q92817	K.DNLSSWLEHLPR.S	19.97	31	0.99336	1	1.2415	1.00549e-14
DNLTLWTADNAGEEGGEAPQEPQS	1433S_HUMAN	P31947	R.DNLTLWTADNAGEEGGEAPQEPQS.-	64.919	17	0.99264	1	1.04336	4.633e-15
DNTAQQIKK	SPB3_HUMAN	Q8IXI3	K.DNTAQQIKK.V	42.821	15	0.97165	1	1.9077	1.34902e-11
DQQEAALVDMVNDGVEDLR	GSTP1_HUMAN	P09211	K.DQQEAALVDMVNDGVEDLR.C	65.714	12	0.99215	1	1.3176	2.65005e-23
DQVANSAFVER	HS90A_HUMAN	P07900	K.DQVANSAFVER.L	19.945	13	0.9939	1	0.940471	2.9541e-15
DQYEQMAEK	K1C16_HUMAN	P08779	R.DQYEQMAEK.N	72.304	50	0.99296	1	0.933821	1.25513e-12
DRPARHPQEQP	PROL4_HUMAN	Q16378	R.DRPARHPQEQP.L	19.403	5	0.88604	1	1.57575	3.11064e-11
DRPARHPQEQPLW	PROL4_HUMAN	Q16378	R.DRPARHPQEQPLW.-	19.403	5	0.99252	1	1.75096	1.76603e-14
DRPFFPGLVK	NDK8_HUMAN	O60361	K.DRPFFPGLVK.Y	19.708	2	0.99257	1	1.35896	5.87091e-12
DRPFFPGLVK	NDKB_HUMAN	P22392	K.DRPFFPGLVK.Y	41.447	5	0.99257	1	1.35896	5.87091e-12
DSAHGFLK	TRFE_HUMAN	P02787	K.DSAHGFLK.V	29.37	20	0.99297	1	1.14307	7.8125e-12
DSAIGFSR	TRFL_HUMAN	Q8TCD2	K.DSAIGFSR.V	34.085	34	0.99312	1	1.36091	7.8125e-12
DSATMSLDPEEEAEHPIK	TGM3_HUMAN	Q08188	K.DSATMSLDPEEEAEHPIK.I	58.297	45	0.99327	1	0.792637	8.40217e-19
DSATMSLDPEEEAEHPIKI	TGM3_HUMAN	Q08188	K.DSATMSLDPEEEAEHPIKI.S	58.297	45	0.99185	1	1.3409	2.23626e-16
DSATMSLDPEEEAEHPIKISYAQYEK	TGM3_HUMAN	Q08188	K.DSATMSLDPEEEAEHPIKISYAQYEK.Y	58.297	45	0.99307	1	0.761316	7.14822e-23
DSGFQMNQLR	TRFE_HUMAN	P02787	K.DSGFQMNQLR.G	29.37	20	0.99338	1	1.97247	7.8125e-14
DSGVPDRFSGSGSGTDFTLK	KV206_HUMAN	P06310	R.DSGVPDRFSGSGSGTDFTLK.I	15.038	2	0.99342	1	1.13631	5.46402e-17
DSLLQDGEFSMDLR	PROF1_HUMAN	P07737	R.DSLLQDGEFSMDLR.T	68.571	10	0.9928	1	1.12412	3.41797e-18
DSLNDEINFLK	K2C4_HUMAN	P19013	V.DSLNDEINFLK.V	74.532	75	0.98764	1	1.58131	1.29004e-13
DSPSVWAAVPGK	PROF1_HUMAN	P07737	K.DSPSVWAAVPGK.T	68.571	10	0.99287	1	1.38659	4.6283e-16
DSTLIMQLLR	1433B_HUMAN	P31946	K.DSTLIMQLLR.D	36.179	8	0.9932	1	1.04446	3.125e-13
DSTLIMQLLR	1433E_HUMAN	P62258	K.DSTLIMQLLR.D	19.608	5	0.9932	1	1.04446	3.125e-13
DSTLIMQLLR	1433F_HUMAN	Q04917	K.DSTLIMQLLR.D	7.317	2	0.9932	1	1.04446	3.125e-13
DSTLIMQLLR	1433G_HUMAN	P61981	K.DSTLIMQLLR.D	18.623	4	0.9932	1	1.04446	3.125e-13
DSTLIMQLLR	1433S_HUMAN	P31947	K.DSTLIMQLLR.D	64.919	17	0.9932	1	1.04446	3.125e-13
DSTLIMQLLR	1433T_HUMAN	P27348	K.DSTLIMQLLR.D	22.449	5	0.9932	1	1.04446	3.125e-13
DSTLIMQLLR	1433Z_HUMAN	Q6NUR9	K.DSTLIMQLLR.D	53.878	14	0.9932	1	1.04446	3.125e-13
DSTYSLSSTLTLSK	IGKC_HUMAN	P01834	K.DSTYSLSSTLTLSK.A	52.83	6	0.99256	1	0.132512	4.88281e-19
DSVFMGNHAER	TGM3_HUMAN	Q08188	V.DSVFMGNHAER.E	58.297	45	0.99164	1	0.590305	1.03027e-13
DSYVGDEAQSK	ACTA_HUMAN	P62736	K.DSYVGDEAQSK.R	46.154	28	0.99336	1	0.41987	9.76563e-16
DSYVGDEAQSK	ACTB_HUMAN	Q96HG5	K.DSYVGDEAQSK.R	80.8	48	0.99336	1	0.41987	9.76563e-16
DSYVGDEAQSK	ACTC_HUMAN	P68032	K.DSYVGDEAQSK.R	48.806	32	0.99336	1	0.41987	9.76563e-16
DSYVGDEAQSK	ACTG_HUMAN	P63261	K.DSYVGDEAQSK.R	80.8	48	0.99336	1	0.41987	9.76563e-16
DSYVGDEAQSK	ACTH_HUMAN	P63267	K.DSYVGDEAQSK.R	46.277	28	0.99336	1	0.41987	9.76563e-16
DSYVGDEAQSK	ACTS_HUMAN	P68133	K.DSYVGDEAQSK.R	45.093	30	0.99336	1	0.41987	9.76563e-16
DSYVGDEAQSKR	ACTA_HUMAN	P62736	K.DSYVGDEAQSKR.G	46.154	28	0.99366	1	0.11074	9.76563e-17
DSYVGDEAQSKR	ACTB_HUMAN	Q96HG5	K.DSYVGDEAQSKR.G	80.8	48	0.99366	1	0.11074	9.76563e-17
DSYVGDEAQSKR	ACTC_HUMAN	P68032	K.DSYVGDEAQSKR.G	48.806	32	0.99366	1	0.11074	9.76563e-17
DSYVGDEAQSKR	ACTG_HUMAN	P63261	K.DSYVGDEAQSKR.G	80.8	48	0.99366	1	0.11074	9.76563e-17
DSYVGDEAQSKR	ACTH_HUMAN	P63267	K.DSYVGDEAQSKR.G	46.277	28	0.99366	1	0.11074	9.76563e-17
DSYVGDEAQSKR	ACTS_HUMAN	P68133	K.DSYVGDEAQSKR.G	45.093	30	0.99366	1	0.11074	9.76563e-17
DTNGSQFFITTVK	PPIB_HUMAN	P23284	K.DTNGSQFFITTVK.T	36.111	7	0.99289	1	1.04282	9.76563e-18
DTVIKPLLVEPEGLEK	A2MG_HUMAN	P01023	K.DTVIKPLLVEPEGLEK.E	24.763	26	0.99247	1	1.0525	8.58499e-18
DVDAAFMNK	K22O_HUMAN	Q01546	K.DVDAAFMNK.V	46.082	34	0.99013	1	0.733367	1.95313e-13
DVDAAFMNK	KRT84_HUMAN	Q9NSB2	K.DVDAAFMNK.S	5.833	5	0.99013	1	0.733367	1.95313e-13
DVDAAFMNKVELQAK	K22O_HUMAN	Q01546	K.DVDAAFMNKVELQAK.V	46.082	34	0.95516	1	1.277	7.32422e-20
DVDAAYLNKVELEAK	K2C4_HUMAN	P19013	K.DVDAAYLNKVELEAK.V	74.532	75	0.99315	1	0.644179	2.44141e-20
DVDAAYLNKVELEAKVDSLNDEINFLK	K2C4_HUMAN	P19013	K.DVDAAYLNKVELEAKVDSLNDEINFLK.V	74.532	75	0.99304	1	0.692106	9.08957e-28
DVDAAYMNK	K2C5_HUMAN	P13647	K.DVDAAYMNK.V	65.932	71	0.99347	1	1.55951	1.95313e-13
DVDAAYMNK	K2C6A_HUMAN	P02538	K.DVDAAYMNK.V	70.035	77	0.99347	1	1.55951	1.95313e-13
DVDAAYMNK	K2C6B_HUMAN	P04259	K.DVDAAYMNK.V	68.44	73	0.99347	1	1.55951	1.95313e-13
DVDAAYMNK	K2C6C_HUMAN	P48668	K.DVDAAYMNK.V	67.553	75	0.99347	1	1.55951	1.95313e-13
DVDAAYMNK	K2C72_HUMAN	Q14CN4	K.DVDAAYMNK.V	6.458	7	0.99347	1	1.55951	1.95313e-13
DVDAAYMNK	K2C75_HUMAN	O95678	K.DVDAAYMNK.V	20.145	22	0.99347	1	1.55951	1.95313e-13
DVDAAYMNKV	K2C5_HUMAN	P13647	K.DVDAAYMNKV.E	65.932	71	0.99281	1	1.55934	1.95313e-14
DVDAAYMNKV	K2C6A_HUMAN	P02538	K.DVDAAYMNKV.E	70.035	77	0.99281	1	1.55934	1.95313e-14
DVDAAYMNKV	K2C6B_HUMAN	P04259	K.DVDAAYMNKV.E	68.44	73	0.99281	1	1.55934	1.95313e-14
DVDAAYMNKV	K2C6C_HUMAN	P48668	K.DVDAAYMNKV.E	67.553	75	0.99281	1	1.55934	1.95313e-14
DVDAAYMNKV	K2C72_HUMAN	Q14CN4	K.DVDAAYMNKV.E	6.458	7	0.99281	1	1.55934	1.95313e-14
DVDAAYMNKV	K2C75_HUMAN	O95678	K.DVDAAYMNKV.E	20.145	22	0.99281	1	1.55934	1.95313e-14
DVDAAYMNKVELEAK	K2C5_HUMAN	P13647	K.DVDAAYMNKVELEAK.V	65.932	71	0.98964	1	1.30805	1.2207e-20
DVDAAYMNKVELEAK	K2C75_HUMAN	O95678	K.DVDAAYMNKVELEAK.V	20.145	22	0.98964	1	1.30805	1.2207e-20
DVDAAYMNKVELQAK	K2C6A_HUMAN	P02538	K.DVDAAYMNKVELQAK.A	70.035	77	0.98947	1	1.0795	2.44141e-20
DVDAAYMNKVELQAK	K2C6B_HUMAN	P04259	K.DVDAAYMNKVELQAK.A	68.44	73	0.98947	1	1.0795	2.44141e-20
DVDAAYMNKVELQAK	K2C6C_HUMAN	P48668	K.DVDAAYMNKVELQAK.A	67.553	75	0.98947	1	1.0795	2.44141e-20
DVDAAYMNKVELQAK	K2C72_HUMAN	Q14CN4	K.DVDAAYMNKVELQAK.V	6.458	7	0.98947	1	1.0795	2.44141e-20
DVDGAYMTK	K2C1_HUMAN	P04264	K.DVDGAYMTK.V	66.77	58	0.9926	1	1.25656	1.95313e-13
DVDLEFLAK	TERA_HUMAN	P55072	K.DVDLEFLAK.M	12.655	8	0.9925	1	1.21283	1.75781e-12
DVEAWFFSK	K1C15_HUMAN	P19012	R.DVEAWFFSK.T	27.412	19	0.99277	1	1.25496	2.05078e-13
DVFLGMFLYEYAR	ALBU_HUMAN	Q9P157	K.DVFLGMFLYEYAR.R	41.544	47	0.99205	1	0.285867	4.88281e-18
DVLDGHLR	DESP_HUMAN	P15924	R.DVLDGHLR.E	49.739	138	0.9882	1	0.954972	1.5625e-11
DVLGMAQDEMAQAFEDWNKTELDSFLIEITANILK	6PGD_HUMAN	P52209	K.DVLGMAQDEMAQAFEDWNKTELDSFLIEITANILK.F	41.615	17	0.99272	1	1.51313	2.35495e-24
DVNAAIAAIK	TBA4A_HUMAN	P68366	K.DVNAAIAAIK.T	34.598	13	0.99283	1	1.40195	3.90625e-14
DVNAAIATIK	TBA1A_HUMAN	Q71U36	K.DVNAAIATIK.T	37.694	14	0.99236	1	1.8047	3.90625e-14
DVNAAIATIK	TBA1B_HUMAN	P68363	K.DVNAAIATIK.T	40.798	15	0.99236	1	1.8047	3.90625e-14
DVNAAIATIK	TBA1C_HUMAN	Q9BQE3	K.DVNAAIATIK.T	40.98	15	0.99236	1	1.8047	3.90625e-14
DVNAAIATIK	TBA3C_HUMAN	Q13748	K.DVNAAIATIK.T	32.444	12	0.99236	1	1.8047	3.90625e-14
DVNAAIATIK	TBA3E_HUMAN	Q6PEY2	K.DVNAAIATIK.T	26.222	9	0.99236	1	1.8047	3.90625e-14
DVNDWVGPPNDNGVTK	AMY1_HUMAN	P04745	K.DVNDWVGPPNDNGVTK.E	65.362	60	0.9909	1	-0.0933482	3.15044e-20
DVNQQEFVR	RS19_HUMAN	P39019	K.DVNQQEFVR.A	16.552	2	0.99205	1	0.729216	1.04304e-12
DVTVLQNTDGNNNEAWAK	TRFL_HUMAN	Q8TCD2	K.DVTVLQNTDGNNNEAWAK.D	34.085	34	0.99244	1	0.635236	6.72516e-23
DWIDGVLNNPGPG	CAP7_HUMAN	P20160	R.DWIDGVLNNPGPG.P	15.139	5	0.99256	1	1.42988	1.2335e-12
DYAEVGR	HPT_HUMAN	P00738	K.DYAEVGR.V	18.966	10	0.97925	1	0.825982	7.8125e-11
DYFGAHTYELLAKPGQFIHTNWTGHGGTVSSSSYNA	6PGD_HUMAN	P52209	R.DYFGAHTYELLAKPGQFIHTNWTGHGGTVSSSSYNA.-	41.615	17	0.99176	1	0.792575	4.87314e-19
DYFPEPV	IGHG1_HUMAN	P01857	K.DYFPEPV.T	34.848	16	0.979	1	0.0911732	7.8125e-11
DYFPEPV	IGHG2_HUMAN	P01859	K.DYFPEPV.T	30.982	12	0.979	1	0.0911732	7.8125e-11
DYFPEPV	IGHG3_HUMAN	P01860	K.DYFPEPV.T	22.546	13	0.979	1	0.0911732	7.8125e-11
DYFPEPV	IGHG4_HUMAN	P01861	K.DYFPEPV.T	29.052	14	0.979	1	0.0911732	7.8125e-11
DYFPEPVTV	IGHG1_HUMAN	P01857	K.DYFPEPVTV.S	34.848	16	0.99276	1	0.791833	1.95313e-13
DYFPEPVTV	IGHG2_HUMAN	P01859	K.DYFPEPVTV.S	30.982	12	0.99276	1	0.791833	1.95313e-13
DYFPEPVTV	IGHG3_HUMAN	P01860	K.DYFPEPVTV.S	22.546	13	0.99276	1	0.791833	1.95313e-13
DYFPEPVTV	IGHG4_HUMAN	P01861	K.DYFPEPVTV.S	29.052	14	0.99276	1	0.791833	1.95313e-13
DYLPLVLGPTAMR	PERM_HUMAN	P05164	R.DYLPLVLGPTAMR.K	29.396	23	0.99267	1	1.15547	1.16378e-14
DYPDFSPSVDAEAIQK	ANXA3_HUMAN	P12429	R.DYPDFSPSVDAEAIQK.A	31.579	8	0.99258	1	0.278917	9.83134e-18
DYPVVSIEDPFDQDDWGAWQK	ENOA_HUMAN	Q6GMP2	K.DYPVVSIEDPFDQDDWGAWQK.F	64.977	24	0.99251	1	0.902672	1.78523e-18
DYQELMNTK	K2C1_HUMAN	P04264	R.DYQELMNTK.L	66.77	58	0.99386	1	0.469438	7.8125e-13
DYSPYFK	K1C14_HUMAN	P02533	K.DYSPYFK.T	60.593	45	0.99136	1	1.82946	7.8125e-11
DYSPYFK	K1C16_HUMAN	P08779	K.DYSPYFK.T	72.304	50	0.99136	1	1.82946	7.8125e-11
DYSPYYK	K1C13_HUMAN	P13646	R.DYSPYYK.T	69.869	59	0.99349	1	1.10787	7.8125e-11
DYVSQFEGSALGK	APOA1_HUMAN	P02647	R.DYVSQFEGSALGK.Q	63.296	16	0.99272	1	0.369732	5.27374e-18
EAAEKEQELLK	GBP6_HUMAN	Q6ZN66	K.EAAEKEQELLK.Q	35.387	19	0.99124	1	1.46549	2.16926e-12
EAAENSLVAYK	1433E_HUMAN	P62258	K.EAAENSLVAYK.A	19.608	5	0.99266	1	0.656589	7.76612e-14
EADDIVNWLK	PDIA1_HUMAN	P07237	R.EADDIVNWLK.K	48.819	20	0.99266	1	1.06924	3.90625e-14
EAEAAIYHLQLFEELRR	KPYM_HUMAN	Q9BWB5	R.EAEAAIYHLQLFEELRR.L	49.153	22	0.99155	1	1.80592	4.14213e-16
EAEVLLLQQR	PEPL_HUMAN	O60437	R.EAEVLLLQQR.V	32.517	52	0.99375	1	0.728998	6.25e-13
EAFQLFDR	MYL6_HUMAN	P60660	K.EAFQLFDR.T	40.397	5	0.9924	1	1.19044	1.5625e-11
EAINVEQAFQTIAR	RAB7A_HUMAN	P51149	K.EAINVEQAFQTIAR.N	16.425	3	0.99118	1	1.48676	1.62326e-15
EAVHVTVPDAITEWK	A2ML1_HUMAN	A8K2U0	K.EAVHVTVPDAITEWK.A	27.854	29	0.99266	1	1.17559	1.34583e-19
EAYPGDVFYLHSR	ATPA_HUMAN	P25705	R.EAYPGDVFYLHSR.L	20.253	7	0.9927	1	0.913681	6.83594e-17
EDAIWNLLR	TRFL_HUMAN	Q8TCD2	K.EDAIWNLLR.Q	34.085	34	0.99346	1	1.14408	1.75098e-12
EDGGGWWYNR	FIBB_HUMAN	P02675	K.EDGGGWWYNR.C	26.477	10	0.99394	1	0.766405	2.00195e-14
EEGLILFDQIPVSSGFSK	MUC5B_HUMAN	Q7M4S5	K.EEGLILFDQIPVSSGFSK.N	6.265	25	0.99249	1	0.79104	1.3916e-22
EEKPAVTAAPKK	CRYAB_HUMAN	P02511	R.EEKPAVTAAPKK.-	42.857	5	0.99104	1	1.36624	5.17513e-13
EELPNYLVTLPAR	A2ML1_HUMAN	A8K2U0	A.EELPNYLVTLPAR.L	27.854	29	0.99347	1	1.16606	1.7627e-16
EERGPGVPFQR	LEG7_HUMAN	P47929	R.EERGPGVPFQR.G	56.618	11	0.74719	1	1.39071	3.12267e-12
EESGKPGAHVTVK	ROA2_HUMAN	P22626	R.EESGKPGAHVTVK.K	9.348	2	0.95173	1	0.427452	4.88281e-18
EFADSLGIPFLETSAK	RAB1A_HUMAN	P62820	K.EFADSLGIPFLETSAK.N	13.171	2	0.99259	1	0.380134	1.79478e-12
EFADSLGIPFLETSAK	RAB1B_HUMAN	Q9H0U4	K.EFADSLGIPFLETSAK.N	21.891	3	0.99259	1	0.380134	1.79478e-12
EFADSLGIPFLETSAK	RAB1C_HUMAN	Q92928	K.EFADSLGIPFLETSAK.N	21.891	3	0.99259	1	0.380134	1.79478e-12
EFLVLVFK	CRNN_HUMAN	Q9UBG3	K.EFLVLVFK.V	54.141	18	0.99264	1	1.35841	1.5625e-11
EFPFYGDYGSNY	HIS1_HUMAN	P15515	R.EFPFYGDYGSNY.L	28.07	7	0.99351	1	1.7162	2.10953e-16
EFPFYGDYGSNYL	HIS1_HUMAN	P15515	R.EFPFYGDYGSNYL.Y	28.07	7	0.99301	1	1.12468	1.38221e-14
EFPFYGDYGSNYLY	HIS1_HUMAN	P15515	R.EFPFYGDYGSNYLY.D	28.07	7	0.99364	1	1.14245	5.90395e-15
EFPFYGDYGSNYLYDN	HIS1_HUMAN	P15515	R.EFPFYGDYGSNYLYDN.-	28.07	7	0.99257	1	0.281232	3.33971e-18
EFPGFLENQKDPLAVDK	S10AA_HUMAN	P60903	K.EFPGFLENQKDPLAVDK.I	45.361	3	0.99364	1	1.11615	3.07766e-19
EFSIDVGYER	ARP3_HUMAN	P61158	K.EFSIDVGYER.F	10.766	4	0.99265	1	1.30714	3.90625e-14
EFTPPVQAAYQK	HBB_HUMAN	Q549N7	K.EFTPPVQAAYQK.V	80.952	12	0.99341	1	0.533718	1.07422e-16
EGDLIAAQAR	LMNA_HUMAN	P02545	K.EGDLIAAQAR.L	24.096	14	0.99288	1	1.12139	9.17969e-12
EGDVQLNFDMPFIFAEVNADR	TGM3_HUMAN	Q08188	R.EGDVQLNFDMPFIFAEVNADR.I	58.297	45	0.99386	1	0.776424	9.00749e-20
EGDVQLNFDMPFIFAEVNADRI	TGM3_HUMAN	Q08188	R.EGDVQLNFDMPFIFAEVNADRI.T	58.297	45	0.99156	1	1.69919	2.17944e-20
EGDVQLNFDMPFIFAEVNADRITWLYDNTTGK	TGM3_HUMAN	Q08188	R.EGDVQLNFDMPFIFAEVNADRITWLYDNTTGK.Q	58.297	45	0.99106	1	0.346433	1.53718e-18
EGDVQLNFDMPFIFAEVNADRITWLYDNTTGKQWK	TGM3_HUMAN	Q08188	R.EGDVQLNFDMPFIFAEVNADRITWLYDNTTGKQWK.N	58.297	45	0.9939	1	0.117736	8.12245e-16
EGEDNSKRNPIAK	DSG1_HUMAN	Q02413	R.EGEDNSKRNPIAK.I	15.253	10	0.9931	1	1.07783	2.04539e-13
EGEDNSKRNPIAK	DSG3_HUMAN	P32926	R.EGEDNSKRNPIAK.I	9.61	7	0.9931	1	1.07783	2.04539e-13
EGFGHLSPTGTTEFWLGNEK	FIBG_HUMAN	Q9UC63	K.EGFGHLSPTGTTEFWLGNEK.I	20.971	7	0.99376	1	1.22147	7.52332e-24
EGIPALDNFLDKL	EF2_HUMAN	P13639	K.EGIPALDNFLDKL.-	33.566	23	0.99079	1	1.06569	9.02344e-16
EGITVTGNR	GBP6_HUMAN	Q6ZN66	R.EGITVTGNR.L	35.387	19	0.99245	1	1.12693	1.60156e-11
EGLLAIFK	CTNB1_HUMAN	P35222	R.EGLLAIFK.S	2.433	2	0.99253	1	1.0129	3.125e-11
EGLLAIFK	PLAK_HUMAN	P14923	R.EGLLAIFK.S	42.55	30	0.99253	1	1.0129	3.125e-11
EGMLVVNGVDLLSSR	TGM1_HUMAN	P22735	R.EGMLVVNGVDLLSSR.S	26.683	16	0.99301	1	0.789695	1.19176e-16
EGMNIVEAMER	PPIA_HUMAN	P62937	K.EGMNIVEAMER.F	43.03	9	0.99329	1	0.879166	9.76563e-16
EGSGLLLGNLK	TGM3_HUMAN	Q08188	V.EGSGLLLGNLK.I	58.297	45	0.98742	1	0.918041	4.2207e-12
EGVHGGLINK	PROF1_HUMAN	P07737	K.EGVHGGLINK.K	68.571	10	0.98856	1	1.13266	3.90625e-14
EGVHGGLINKK	PROF1_HUMAN	P07737	K.EGVHGGLINKK.C	68.571	10	0.99272	1	0.389955	3.90625e-15
EGVIIEILASR	ANXA8_HUMAN	P13928	K.EGVIIEILASR.T	11.621	4	0.99149	1	1.24119	3.4375e-13
EGVIIEILASR	AXA81_HUMAN	Q5T2P8	K.EGVIIEILASR.T	11.621	4	0.99149	1	1.24119	3.4375e-13
EGVIIEILASR	AXA82_HUMAN	Q5VT79	K.EGVIIEILASR.T	11.621	4	0.99149	1	1.24119	3.4375e-13
EGYYGYTGAFR	TRFE_HUMAN	P02787	K.EGYYGYTGAFR.C	29.37	20	0.9939	1	0.917929	1.09985e-15
EHALLAYTLGVK	EF1A1_HUMAN	P68104	R.EHALLAYTLGVK.Q	36.58	16	0.99204	1	0.470263	1.95313e-16
EHALLAYTLGVK	EF1A2_HUMAN	Q05639	R.EHALLAYTLGVK.Q	18.79	9	0.99204	1	0.470263	1.95313e-16
EHALLAYTLGVK	EF1A3_HUMAN	Q5VTE0	R.EHALLAYTLGVK.Q	36.58	16	0.99204	1	0.470263	1.95313e-16
EHHTDEYEYDELIVR	TGM1_HUMAN	P22735	R.EHHTDEYEYDELIVR.R	26.683	16	0.99224	1	1.35074	1.2207e-20
EHLMLEEELR	DESP_HUMAN	P15924	K.EHLMLEEELR.N	49.739	138	0.99362	1	0.928845	1.55078e-13
EHNPVRGPDGK	ISK5_HUMAN	Q9NQ38	R.EHNPVRGPDGK.M	4.229	4	0.98349	1	2.16762	3.90625e-15
EHVAHLLFLR	A1AG2_HUMAN	P19652	R.EHVAHLLFLR.D	9.453	2	0.99268	1	1.24731	2.42212e-13
EIAQDFKTDLR	H33_HUMAN	P84243	R.EIAQDFKTDLR.F	21.324	2	0.99225	1	1.31732	1.5625e-14
EIDAYGQQLR	EVPL_HUMAN	Q92817	K.EIDAYGQQLR.S	19.97	31	0.99274	1	1.22995	1.5625e-13
EIGELYLPK	AACT_HUMAN	Q6NSC9	R.EIGELYLPK.F	4.492	2	0.97551	1	0.870372	1.7627e-12
EIIDLVLDR	TBA1A_HUMAN	Q71U36	K.EIIDLVLDR.I	37.694	14	0.99199	1	1.41424	3.125e-12
EIIDLVLDR	TBA1B_HUMAN	P68363	K.EIIDLVLDR.I	40.798	15	0.99199	1	1.41424	3.125e-12
EIIDLVLDR	TBA1C_HUMAN	Q9BQE3	K.EIIDLVLDR.I	40.98	15	0.99199	1	1.41424	3.125e-12
EIKPLAQSHATK	MYG_HUMAN	P02144	A.EIKPLAQSHATK.H	24.026	6	0.9911	0.999677	0.844572	7.8125e-15
EILELAGNAAR	H2A1B_HUMAN	P04908	A.EILELAGNAAR.D	57.692	14	0.99307	1	0.66198	3.90625e-14
EILELAGNAAR	H2A1C_HUMAN	Q93077	A.EILELAGNAAR.D	63.077	15	0.99307	1	0.66198	3.90625e-14
EILELAGNAAR	H2A1D_HUMAN	P20671	A.EILELAGNAAR.D	57.692	14	0.99307	1	0.66198	3.90625e-14
EILELAGNAAR	H2A1H_HUMAN	Q96KK5	A.EILELAGNAAR.D	64.062	15	0.99307	1	0.66198	3.90625e-14
EILELAGNAAR	H2A1J_HUMAN	Q99878	A.EILELAGNAAR.D	64.062	15	0.99307	1	0.66198	3.90625e-14
EILELAGNAAR	H2A1_HUMAN	P0C0S8	A.EILELAGNAAR.D	63.077	15	0.99307	1	0.66198	3.90625e-14
EILELAGNAAR	H2A2A_HUMAN	Q6FI13	A.EILELAGNAAR.D	63.077	16	0.99307	1	0.66198	3.90625e-14
EILELAGNAAR	H2A2B_HUMAN	Q8IUE6	A.EILELAGNAAR.D	49.231	12	0.99307	1	0.66198	3.90625e-14
EILELAGNAAR	H2A2C_HUMAN	Q16777	A.EILELAGNAAR.D	63.566	16	0.99307	1	0.66198	3.90625e-14
EILELAGNAAR	H2A3_HUMAN	Q7L7L0	A.EILELAGNAAR.D	57.692	14	0.99307	1	0.66198	3.90625e-14
EILELAGNAAR	H2AJ_HUMAN	Q9BTM1	A.EILELAGNAAR.D	63.566	15	0.99307	1	0.66198	3.90625e-14
EILELAGNAAR	H2AX_HUMAN	P16104	A.EILELAGNAAR.D	39.86	11	0.99307	1	0.66198	3.90625e-14
EILELAGNAAR	H2AY_HUMAN	O75367	A.EILELAGNAAR.D	5.914	9	0.99307	1	0.66198	3.90625e-14
EIPAWVPFDPAAQITK	ZA2G_HUMAN	P25311	K.EIPAWVPFDPAAQITK.Q	43.96	13	0.99304	1	0.471959	7.61974e-17
EIQALKDTKPQVQTK	PEPL_HUMAN	O60437	K.EIQALKDTKPQVQTK.E	32.517	52	0.99362	1	1.1546	5.99365e-19
EISLWFKPEELVDYK	NDKB_HUMAN	P22392	K.EISLWFKPEELVDYK.S	41.447	5	0.99209	1	1.34461	3.20985e-15
EITALAPSTMK	ACTA_HUMAN	P62736	K.EITALAPSTMK.I	46.154	28	0.99315	1	0.806989	1.95313e-15
EITALAPSTMK	ACTB_HUMAN	Q96HG5	K.EITALAPSTMK.I	80.8	48	0.99315	1	0.806989	1.95313e-15
EITALAPSTMK	ACTC_HUMAN	P68032	K.EITALAPSTMK.I	48.806	32	0.99315	1	0.806989	1.95313e-15
EITALAPSTMK	ACTG_HUMAN	P63261	K.EITALAPSTMK.I	80.8	48	0.99315	1	0.806989	1.95313e-15
EITALAPSTMK	ACTH_HUMAN	P63267	K.EITALAPSTMK.I	46.277	28	0.99315	1	0.806989	1.95313e-15
EITALAPSTMK	ACTS_HUMAN	P68133	K.EITALAPSTMK.I	45.093	30	0.99315	1	0.806989	1.95313e-15
EIVLTQSPATLSLSPGER	KV309_HUMAN	P04433	G.EIVLTQSPATLSLSPGER.A	35.652	3	0.99285	1	0.54027	8.04444e-19
EIVLTQSPGTLSLSPGER	KV302_HUMAN	P01620	-.EIVLTQSPGTLSLSPGER.A	39.45	4	0.99234	1	-0.125757	1.51825e-20
EIVLTQSPGTLSLSPGER	KV305_HUMAN	P01623	-.EIVLTQSPGTLSLSPGER.A	39.45	4	0.99234	1	-0.125757	1.51825e-20
EIVLTQSPGTLSLSPGER	KV312_HUMAN	P18135	G.EIVLTQSPGTLSLSPGER.A	50.388	5	0.99234	1	-0.125757	1.51825e-20
EIVLTQSPGTLSLSPGER	KV313_HUMAN	P18136	G.EIVLTQSPGTLSLSPGER.A	50.388	5	0.99234	1	-0.125757	1.51825e-20
EIVMTQSPATLSVSPGER	KV308_HUMAN	P04207	G.EIVMTQSPATLSVSPGER.A	20.93	2	0.99312	1	0.54178	5.95466e-18
EIVNKHNELR	CRIS3_HUMAN	P54108	R.EIVNKHNELR.R	20.816	5	0.99301	1	0.699223	7.8125e-14
EIVNKHNELRR	CRIS3_HUMAN	P54108	R.EIVNKHNELRR.A	20.816	5	0.99257	1	0.313199	2.65607e-13
EKLEATINELV	THIO_HUMAN	P10599	K.EKLEATINELV.-	46.667	9	0.99352	1	1.1654	5.43779e-13
EKPAGGIPVLGSLVNTVLK	LPLC1_HUMAN	Q9H4V6	R.EKPAGGIPVLGSLVNTVLK.H	45.041	20	0.99315	1	1.024	5.27737e-21
EKPLALYMFSSNDK	AL3A1_HUMAN	P30838	R.EKPLALYMFSSNDK.V	30.243	11	0.99232	1	1.58892	2.74472e-15
EKPLALYMFSSNDKVIKK	AL3A1_HUMAN	P30838	R.EKPLALYMFSSNDKVIKK.M	30.243	11	0.98754	1	1.12746	4.2677e-13
EKQLAAENR	MYH9_HUMAN	P35579	R.EKQLAAENR.L	15.357	24	0.88931	1	1.83036	3.90625e-12
EKSAIYQLEEEYENLLK	DESP_HUMAN	P15924	R.EKSAIYQLEEEYENLLK.A	49.739	138	0.99308	1	1.05374	3.05146e-19
EKWLPYEAGQR	DESP_HUMAN	P15924	K.EKWLPYEAGQR.F	49.739	138	0.99018	1	1.39872	1.79121e-13
EKYLTWASR	IGHA1_HUMAN	P01876	R.EKYLTWASR.Q	44.476	16	0.99282	1	1.24172	7.8125e-13
EKYLTWASR	IGHA2_HUMAN	P01877	R.EKYLTWASR.Q	36.176	13	0.99282	1	1.24172	7.8125e-13
ELAILLGMLDPAEKDEK	PRDX6_HUMAN	P30041	R.ELAILLGMLDPAEKDEK.G	41.071	6	0.99278	1	1.74725	1.61131e-15
ELASQPDVDGFLVGGASLKPEFVDIINAK	TPIS_HUMAN	P60174	K.ELASQPDVDGFLVGGASLKPEFVDIINAK.Q	53.012	9	0.99322	1	0.471905	2.57448e-21
ELDESLQVAER	CLUS_HUMAN	P10909	R.ELDESLQVAER.L	18.931	6	0.99287	1	0.58099	3.90625e-15
ELDRDTVFALVNYIFFK	A1AT_HUMAN	Q86U18	K.ELDRDTVFALVNYIFFK.G	39.952	14	0.9923	1	1.57428	1.58521e-16
ELDVEVSR	PEPL_HUMAN	O60437	R.ELDVEVSR.L	32.517	52	0.98445	1	1.38015	7.8125e-12
ELEDATETADAMNR	MYH9_HUMAN	P35579	R.ELEDATETADAMNR.E	15.357	24	0.99288	1	0.339114	1.2207e-19
ELGVGIALR	FABP5_HUMAN	Q01469	K.ELGVGIALR.K	20.741	4	0.99361	1	0.729369	1.5625e-12
ELGVGIALRK	FABP5_HUMAN	Q01469	K.ELGVGIALRK.M	20.741	4	0.99233	1	1.94026	1.5625e-13
ELISNASDALDKIR	ENPL_HUMAN	P14625	R.ELISNASDALDKIR.L	3.487	2	0.98431	1	0.915391	1.95313e-18
ELISNASDALDKIR	H90B2_HUMAN	Q58FF8	W.ELISNASDALDKIR.Y	18.373	6	0.98431	1	0.915391	1.95313e-18
ELISNASDALDKIR	H90B3_HUMAN	Q58FF7	Q.ELISNASDALDKIR.Y	12.563	6	0.98431	1	0.915391	1.95313e-18
ELISNASDALDKIR	H90B4_HUMAN	Q58FF6	Q.ELISNASDALDKIR.Y	8.119	3	0.98431	1	0.915391	1.95313e-18
ELISNASDALDKIR	HS90B_HUMAN	P08238	R.ELISNASDALDKIR.Y	24.171	15	0.98431	1	0.915391	1.95313e-18
ELNHMLSDTGNR	S10AG_HUMAN	Q96FQ6	K.ELNHMLSDTGNR.K	67.961	9	0.99315	1	0.755032	9.76563e-17
ELNHMLSDTGNRK	S10AG_HUMAN	Q96FQ6	K.ELNHMLSDTGNRK.A	67.961	9	0.99315	1	1.7947	9.76563e-18
ELPGFLQSGK	S100P_HUMAN	P25815	K.ELPGFLQSGK.D	24.211	2	0.98834	1	1.68346	1.66016e-13
ELPSFVGEK	S10A2_HUMAN	P29034	K.ELPSFVGEK.V	17.347	3	0.98842	1	1.57727	7.8125e-13
ELPSFVGEKVDEEGLK	S10A2_HUMAN	P29034	K.ELPSFVGEKVDEEGLK.K	17.347	3	0.99116	1	1.77543	6.20929e-20
ELPSFVGEKVDEEGLKK	S10A2_HUMAN	P29034	K.ELPSFVGEKVDEEGLKK.L	17.347	3	0.99297	1	1.15434	1.90267e-21
ELQNAHNGVNQASK	SBSN_HUMAN	Q6UWP8	K.ELQNAHNGVNQASK.E	46.964	9	0.98944	1	0.320534	1.69556e-18
ELSDIAHR	ALDOA_HUMAN	P04075	K.ELSDIAHR.I	34.341	13	0.93737	1	1.09508	3.125e-11
ELSEALGQIFDSQR	LG3BP_HUMAN	Q08380	R.ELSEALGQIFDSQR.G	23.077	11	0.99291	1	1.19979	1.95313e-18
ELSTVQESFLVK	A2ML1_HUMAN	A8K2U0	K.ELSTVQESFLVK.I	27.854	29	0.99273	1	0.58191	4.10156e-16
ELTSELKENFIR	NGAL_HUMAN	P80188	K.ELTSELKENFIR.F	39.394	8	0.99243	1	0.953323	7.8125e-16
ELTVSNNDINEAGVR	RINI_HUMAN	P13489	K.ELTVSNNDINEAGVR.V	5.64	2	0.99323	1	0.0643639	4.61426e-19
EMDATPGIDLTR	K1C13_HUMAN	P13646	V.EMDATPGIDLTR.V	69.869	59	0.99273	1	0.525264	7.56836e-15
EMNDAAMFYTNR	CAP1_HUMAN	Q01518	K.EMNDAAMFYTNR.V	14.316	5	0.99318	1	0.682813	2.7832e-16
EMPPTNPIR	1433S_HUMAN	P31947	K.EMPPTNPIR.L	64.919	17	0.98092	1	0.753279	3.90625e-13
EMQPTHPIR	1433B_HUMAN	P31946	K.EMQPTHPIR.L	36.179	8	0.99294	1	0.834094	5.74219e-12
EMQPTHPIR	1433T_HUMAN	P27348	K.EMQPTHPIR.L	22.449	5	0.99294	1	0.834094	5.74219e-12
EMQPTHPIR	1433Z_HUMAN	Q6NUR9	K.EMQPTHPIR.L	53.878	14	0.99294	1	0.834094	5.74219e-12
ENKKFPVFK	CYTB_HUMAN	P04080	K.ENKKFPVFK.A	70.408	10	0.99383	1	1.02295	1.5625e-12
ENNPVRGPYGK	ISK5_HUMAN	Q9NQ38	R.ENNPVRGPYGK.M	4.229	4	0.99375	1	1.18322	4.10339e-14
ENTQQHITAR	CATG_HUMAN	P08311	R.ENTQQHITAR.R	29.412	10	0.99049	1	0.45964	1.25e-13
EPGQDLVVLPLSITTDFIPSFR	CO3_HUMAN	P01024	R.EPGQDLVVLPLSITTDFIPSFR.L	20.204	22	0.99248	1	1.67216	1.01063e-18
EPQVYTLPPSREEMTK	IGHG2_HUMAN	P01859	R.EPQVYTLPPSREEMTK.N	30.982	12	0.98752	1	0.722504	3.99937e-17
EPQVYTLPPSREEMTK	IGHG3_HUMAN	P01860	R.EPQVYTLPPSREEMTK.N	22.546	13	0.98752	1	0.722504	3.99937e-17
EQFLDGDGWTSR	CALR_HUMAN	P27797	K.EQFLDGDGWTSR.W	16.067	4	0.99305	1	0.834905	1.46484e-16
EQGQTQTQPGSGQR	CRNN_HUMAN	Q9UBG3	R.EQGQTQTQPGSGQR.W	54.141	18	0.99231	1	2.12848	1.4046e-16
EQGVLSFWR	ADT2_HUMAN	P05141	K.EQGVLSFWR.G	14.43	4	0.99209	1	1.30282	7.8125e-13
EQGVLSFWR	ADT3_HUMAN	P12236	K.EQGVLSFWR.G	14.43	4	0.99209	1	1.30282	7.8125e-13
EQIKTLNNK	K22E_HUMAN	P35908	R.EQIKTLNNK.F	40.845	30	0.99253	1	0.309957	3.125e-12
EQIKTLNNK	K22O_HUMAN	Q01546	R.EQIKTLNNK.F	46.082	34	0.99253	1	0.309957	3.125e-12
EQIKTLNNK	K2C3_HUMAN	P12035	R.EQIKTLNNK.F	32.006	23	0.99253	1	0.309957	3.125e-12
EQIKTLNNK	K2C5_HUMAN	P13647	R.EQIKTLNNK.F	65.932	71	0.99253	1	0.309957	3.125e-12
EQIKTLNNK	K2C6A_HUMAN	P02538	R.EQIKTLNNK.F	70.035	77	0.99253	1	0.309957	3.125e-12
EQIKTLNNK	K2C6B_HUMAN	P04259	R.EQIKTLNNK.F	68.44	73	0.99253	1	0.309957	3.125e-12
EQIKTLNNK	K2C6C_HUMAN	P48668	R.EQIKTLNNK.F	67.553	75	0.99253	1	0.309957	3.125e-12
EQIKTLNNK	K2C75_HUMAN	O95678	R.EQIKTLNNK.F	20.145	22	0.99253	1	0.309957	3.125e-12
EQIKTLNNK	K2C79_HUMAN	Q5XKE5	R.EQIKTLNNK.F	13.084	12	0.99253	1	0.309957	3.125e-12
EQIKTLNNK	K2C7_HUMAN	P08729	S.EQIKTLNNK.F	10.235	7	0.99253	1	0.309957	3.125e-12
EQIKTLNNK	K2C8_HUMAN	Q6P4C7	K.EQIKTLNNK.F	10.145	9	0.99253	1	0.309957	3.125e-12
EQIKTLNNK	KRT84_HUMAN	Q9NSB2	K.EQIKTLNNK.F	5.833	5	0.99253	1	0.309957	3.125e-12
EQIMMLEHTQK	GBP6_HUMAN	Q6ZN66	R.EQIMMLEHTQK.V	35.387	19	0.99252	1	0.889329	7.8125e-15
EQINALTSFLDASFVYSSEPSLASR	PERL_HUMAN	P22079	R.EQINALTSFLDASFVYSSEPSLASR.L	32.865	16	0.99239	1	0.754576	2.30109e-24
EQLGPVTQEFWDNLEKETEGLRQEMSK	APOA1_HUMAN	P02647	R.EQLGPVTQEFWDNLEKETEGLRQEMSK.D	63.296	16	0.99318	1	0.477033	7.24903e-19
EQLKAVMDDFAAFVEK	ALBU_HUMAN	Q9P157	K.EQLKAVMDDFAAFVEK.C	41.544	47	0.99278	1	1.02282	2.44141e-21
EQLLELPEQQEGHLK	INVO_HUMAN	P07476	K.EQLLELPEQQEGHLK.H	34.359	17	0.99249	1	0.980099	4.35011e-14
EQSSSSFSQGQSS	K1C16_HUMAN	P08779	K.EQSSSSFSQGQSS.-	72.304	50	0.99374	1	0.17188	4.23373e-17
EQTFGGVNYFFDVEVGR	CYTS_HUMAN	P01036	R.EQTFGGVNYFFDVEVGR.T	60.993	15	0.99389	1	0.56406	1.52588e-23
EQVANSAFVER	H90B3_HUMAN	Q58FF7	K.EQVANSAFVER.V	12.563	6	0.99262	1	0.720642	9.76563e-16
EQVANSAFVER	HS90B_HUMAN	P08238	K.EQVANSAFVER.V	24.171	15	0.99262	1	0.720642	9.76563e-16
EQYEAMAER	K1C13_HUMAN	P13646	R.EQYEAMAER.N	69.869	59	0.99373	1	1.58244	3.90625e-13
ERENLRQEIEK	DESP_HUMAN	P15924	R.ERENLRQEIEK.F	49.739	138	0.9421	1	1.0846	1.07628e-12
ERIEQDYWQVPR	GBP6_HUMAN	Q6ZN66	K.ERIEQDYWQVPR.K	35.387	19	0.99135	1	1.08716	1.33467e-15
ESHRLPVDIAYKR	DESP_HUMAN	P15924	K.ESHRLPVDIAYKR.G	49.739	138	0.99333	1	0.906335	4.67095e-16
ESKKEDLVFIFWAPESAPLK	COF1_HUMAN	P23528	K.ESKKEDLVFIFWAPESAPLK.S	50	7	0.9926	1	0.802278	9.21252e-22
ESKKEDLVFIFWAPESAPLK	COF2_HUMAN	Q9Y281	K.ESKKEDLVFIFWAPESAPLK.S	18.675	4	0.9926	1	0.802278	9.21252e-22
ESPGQLSDYRVENSMYIINPWVYLER	CF058_HUMAN	Q6P5S2	K.ESPGQLSDYRVENSMYIINPWVYLER.M	33.939	8	0.99324	1	1.01206	3.40353e-21
ESSNVVVTER	DSG1_HUMAN	Q02413	R.ESSNVVVTER.V	15.253	10	0.99162	1	1.21791	2.24609e-14
ETQSQLETER	DESP_HUMAN	P15924	R.ETQSQLETER.S	49.739	138	0.99276	1	0.784212	7.8125e-14
ETTDTDTADQVIASFK	ACTN4_HUMAN	O43707	R.ETTDTDTADQVIASFK.V	42.371	27	0.99291	1	0.149701	7.32422e-22
EVAAFAQFGSDLDAATQQLLSR	ATPA_HUMAN	P25705	R.EVAAFAQFGSDLDAATQQLLSR.G	20.253	7	0.99286	1	0.63068	1.60629e-22
EVASNSELVQSSR	K1C16_HUMAN	P08779	K.EVASNSELVQSSR.S	72.304	50	0.99303	1	1.451	4.88281e-18
EVATNSELVQSGK	K1C14_HUMAN	P02533	R.EVATNSELVQSGK.S	60.593	45	0.99354	1	1.09923	4.88281e-18
EVATNSELVQSGK	K1C17_HUMAN	Q8N1P6	R.EVATNSELVQSGK.S	60.648	30	0.99354	1	1.09923	4.88281e-18
EVATNSELVQSGKSEISELRR	K1C14_HUMAN	P02533	R.EVATNSELVQSGKSEISELRR.T	60.593	45	0.99302	1	1.26433	6.79646e-17
EVATNSELVQSGKSEISELRR	K1C17_HUMAN	Q8N1P6	R.EVATNSELVQSGKSEISELRR.T	60.648	30	0.99302	1	1.26433	6.79646e-17
EVFTSSSSSSSR	K1C16_HUMAN	P08779	R.EVFTSSSSSSSR.Q	72.304	50	0.99388	1	0.225713	2.44141e-17
EVNLVLLLK	TGM3_HUMAN	Q08188	K.EVNLVLLLK.N	58.297	45	0.99213	1	1.51357	3.125e-12
EVQLVESGGGLVQPGGSLR	HV305_HUMAN	P01766	-.EVQLVESGGGLVQPGGSLR.L	15.833	2	0.99092	1	0.221744	9.81938e-22
EVQLVESGGGLVQPGGSLR	HV316_HUMAN	P01777	-.EVQLVESGGGLVQPGGSLR.L	15.966	2	0.99092	1	0.221744	9.81938e-22
EVSTNTAMIQTSK	K1C13_HUMAN	P13646	K.EVSTNTAMIQTSK.T	69.869	59	0.99337	1	0.789672	4.88281e-18
EVSTNTAMIQTSKTEITELRR	K1C13_HUMAN	P13646	K.EVSTNTAMIQTSKTEITELRR.T	69.869	59	0.99275	1	1.00634	3.8144e-16
EVTQVERDPGLDSQAAQLR	EVPL_HUMAN	Q92817	K.EVTQVERDPGLDSQAAQLR.I	19.97	31	0.99325	1	0.547261	5.02034e-16
EVVADSVWVDVK	CO3_HUMAN	P01024	R.EVVADSVWVDVK.D	20.204	22	0.99393	1	1.59984	2.44141e-17
EYFSWEGAFQHVGK	EF1G_HUMAN	P26641	R.EYFSWEGAFQHVGK.A	10.755	4	0.99245	1	1.1751	8.60452e-16
EYLTAEILELAGNAAR	H2A1B_HUMAN	P04908	L.EYLTAEILELAGNAAR.D	57.692	14	0.99295	1	1.49986	2.58666e-18
EYLTAEILELAGNAAR	H2A1C_HUMAN	Q93077	L.EYLTAEILELAGNAAR.D	63.077	15	0.99295	1	1.49986	2.58666e-18
EYLTAEILELAGNAAR	H2A1D_HUMAN	P20671	L.EYLTAEILELAGNAAR.D	57.692	14	0.99295	1	1.49986	2.58666e-18
EYLTAEILELAGNAAR	H2A1H_HUMAN	Q96KK5	L.EYLTAEILELAGNAAR.D	64.062	15	0.99295	1	1.49986	2.58666e-18
EYLTAEILELAGNAAR	H2A1J_HUMAN	Q99878	L.EYLTAEILELAGNAAR.D	64.062	15	0.99295	1	1.49986	2.58666e-18
EYLTAEILELAGNAAR	H2A1_HUMAN	P0C0S8	L.EYLTAEILELAGNAAR.D	63.077	15	0.99295	1	1.49986	2.58666e-18
EYLTAEILELAGNAAR	H2A2A_HUMAN	Q6FI13	L.EYLTAEILELAGNAAR.D	63.077	16	0.99295	1	1.49986	2.58666e-18
EYLTAEILELAGNAAR	H2A2B_HUMAN	Q8IUE6	L.EYLTAEILELAGNAAR.D	49.231	12	0.99295	1	1.49986	2.58666e-18
EYLTAEILELAGNAAR	H2A2C_HUMAN	Q16777	L.EYLTAEILELAGNAAR.D	63.566	16	0.99295	1	1.49986	2.58666e-18
EYLTAEILELAGNAAR	H2A3_HUMAN	Q7L7L0	L.EYLTAEILELAGNAAR.D	57.692	14	0.99295	1	1.49986	2.58666e-18
EYLTAEILELAGNAAR	H2AJ_HUMAN	Q9BTM1	L.EYLTAEILELAGNAAR.D	63.566	15	0.99295	1	1.49986	2.58666e-18
EYLTAEILELAGNAAR	H2AX_HUMAN	P16104	L.EYLTAEILELAGNAAR.D	39.86	11	0.99295	1	1.49986	2.58666e-18
EYLTAEILELAGNAAR	H2AY_HUMAN	O75367	L.EYLTAEILELAGNAAR.D	5.914	9	0.99295	1	1.49986	2.58666e-18
EYQDLLNVK	DESM_HUMAN	Q8TD99	R.EYQDLLNVK.M	4.681	2	0.98697	1	1.42204	2.36328e-12
EYQDLLNVK	GFAP_HUMAN	Q96P18	Q.EYQDLLNVK.L	4.861	3	0.98697	1	1.42204	2.36328e-12
EYQDLLNVK	VIME_HUMAN	Q96ML2	R.EYQDLLNVK.M	28.112	13	0.98697	1	1.42204	2.36328e-12
EYQELMNTK	K2C5_HUMAN	P13647	R.EYQELMNTK.L	65.932	71	0.99231	1	0.15253	8.39844e-13
EYQELMNVK	K2C6A_HUMAN	P02538	K.EYQELMNVK.L	70.035	77	0.99305	1	1.18156	7.8125e-13
EYQELMNVK	K2C6B_HUMAN	P04259	K.EYQELMNVK.L	68.44	73	0.99305	1	1.18156	7.8125e-13
EYQELMNVK	K2C6C_HUMAN	P48668	K.EYQELMNVK.L	67.553	75	0.99305	1	1.18156	7.8125e-13
EYQELMNVK	K2C8_HUMAN	Q6P4C7	R.EYQELMNVK.L	10.145	9	0.99305	1	1.18156	7.8125e-13
EYQELMSVK	K2C4_HUMAN	P19013	R.EYQELMSVK.L	74.532	75	0.9936	1	1.31866	7.8125e-13
EYQELMSVK	K2C7_HUMAN	P08729	R.EYQELMSVK.L	10.235	7	0.9936	1	1.31866	7.8125e-13
EYVNASEVSSGKPVSAR	ZN185_HUMAN	O15231	K.EYVNASEVSSGKPVSAR.Y	8.418	4	0.99223	1	0.865039	5.21851e-21
FAAATGATPIAGR	RSSA_HUMAN	Q86VC0	K.FAAATGATPIAGR.F	12.203	3	0.99128	1	0.759745	2.44141e-18
FADLSEAANR	VIME_HUMAN	Q96ML2	K.FADLSEAANR.N	28.112	13	0.99316	1	1.12337	1.95313e-14
FAEAFEAIPR	TCPQ_HUMAN	P50990	K.FAEAFEAIPR.A	4.015	2	0.99254	1	0.782545	1.17188e-13
FAGDKGYLTK	S10AA_HUMAN	P60903	K.FAGDKGYLTK.E	45.361	3	0.9937	1	2.03719	3.90625e-14
FAIQDISVEETSAK	ACTN1_HUMAN	P12814	R.FAIQDISVEETSAK.E	13.901	10	0.99366	1	0.353144	5.00488e-19
FAIQDISVEETSAK	ACTN2_HUMAN	P35609	R.FAIQDISVEETSAK.E	5.369	4	0.99366	1	0.353144	5.00488e-19
FAIQDISVEETSAK	ACTN3_HUMAN	Q08043	R.FAIQDISVEETSAK.E	2.442	2	0.99366	1	0.353144	5.00488e-19
FAIQDISVEETSAK	ACTN4_HUMAN	O43707	R.FAIQDISVEETSAK.E	42.371	27	0.99366	1	0.353144	5.00488e-19
FANYIDKVR	VIME_HUMAN	Q96ML2	R.FANYIDKVR.F	28.112	13	0.99196	1	1.57319	8.98438e-13
FAPDNEQNILWGLPLQYGWQYR	CF058_HUMAN	Q6P5S2	K.FAPDNEQNILWGLPLQYGWQYR.T	33.939	8	0.99354	1	0.556344	6.07056e-20
FASFIDKV	K22E_HUMAN	P35908	K.FASFIDKV.R	40.845	30	0.98579	1	1.10709	1.5625e-11
FASFIDKV	K22O_HUMAN	Q01546	K.FASFIDKV.R	46.082	34	0.98579	1	1.10709	1.5625e-11
FASFIDKV	K2C1B_HUMAN	Q7Z794	K.FASFIDKV.F	7.093	5	0.98579	1	1.10709	1.5625e-11
FASFIDKV	K2C1_HUMAN	P04264	Q.FASFIDKV.R	66.77	58	0.98579	1	1.10709	1.5625e-11
FASFIDKV	K2C3_HUMAN	P12035	K.FASFIDKV.R	32.006	23	0.98579	1	1.10709	1.5625e-11
FASFIDKV	K2C4_HUMAN	P19013	K.FASFIDKV.Q	74.532	75	0.98579	1	1.10709	1.5625e-11
FASFIDKV	K2C5_HUMAN	P13647	K.FASFIDKV.R	65.932	71	0.98579	1	1.10709	1.5625e-11
FASFIDKV	K2C6A_HUMAN	P02538	K.FASFIDKV.R	70.035	77	0.98579	1	1.10709	1.5625e-11
FASFIDKV	K2C6B_HUMAN	P04259	K.FASFIDKV.R	68.44	73	0.98579	1	1.10709	1.5625e-11
FASFIDKV	K2C6C_HUMAN	P48668	K.FASFIDKV.R	67.553	75	0.98579	1	1.10709	1.5625e-11
FASFIDKV	K2C71_HUMAN	Q3SY84	K.FASFIDKV.R	5.545	5	0.98579	1	1.10709	1.5625e-11
FASFIDKV	K2C72_HUMAN	Q14CN4	K.FASFIDKV.R	6.458	7	0.98579	1	1.10709	1.5625e-11
FASFIDKV	K2C73_HUMAN	Q86Y46	K.FASFIDKV.R	7.593	7	0.98579	1	1.10709	1.5625e-11
FASFIDKV	K2C74_HUMAN	Q7RTS7	K.FASFIDKV.R	3.97	4	0.98579	1	1.10709	1.5625e-11
FASFIDKV	K2C75_HUMAN	O95678	K.FASFIDKV.R	20.145	22	0.98579	1	1.10709	1.5625e-11
FASFIDKV	K2C78_HUMAN	Q8N1N4	Q.FASFIDKV.R	44.038	31	0.98579	1	1.10709	1.5625e-11
FASFIDKV	K2C79_HUMAN	Q5XKE5	K.FASFIDKV.R	13.084	12	0.98579	1	1.10709	1.5625e-11
FASFIDKV	K2C7_HUMAN	P08729	K.FASFIDKV.R	10.235	7	0.98579	1	1.10709	1.5625e-11
FASFIDKV	K2C8_HUMAN	Q6P4C7	K.FASFIDKV.R	10.145	9	0.98579	1	1.10709	1.5625e-11
FASFIDKV	KRT84_HUMAN	Q9NSB2	K.FASFIDKV.R	5.833	5	0.98579	1	1.10709	1.5625e-11
FASFIDKVQF	K2C4_HUMAN	P19013	K.FASFIDKVQF.L	74.532	75	0.98964	0.990467	1.07195	7.8125e-14
FASFIDKVQFLEQQNK	K2C4_HUMAN	P19013	K.FASFIDKVQFLEQQNK.V	74.532	75	0.9933	1	0.698455	9.76563e-21
FASFIDKVQFLEQQNKVLETK	K2C4_HUMAN	P19013	K.FASFIDKVQFLEQQNKVLETK.W	74.532	75	0.99022	1	0.894942	4.85182e-23
FASFIDKVR	K22E_HUMAN	P35908	K.FASFIDKVR.F	40.845	30	0.99315	1	0.60901	7.8125e-13
FASFIDKVR	K22O_HUMAN	Q01546	K.FASFIDKVR.F	46.082	34	0.99315	1	0.60901	7.8125e-13
FASFIDKVR	K2C1_HUMAN	P04264	Q.FASFIDKVR.F	66.77	58	0.99315	1	0.60901	7.8125e-13
FASFIDKVR	K2C3_HUMAN	P12035	K.FASFIDKVR.F	32.006	23	0.99315	1	0.60901	7.8125e-13
FASFIDKVR	K2C5_HUMAN	P13647	K.FASFIDKVR.F	65.932	71	0.99315	1	0.60901	7.8125e-13
FASFIDKVR	K2C6A_HUMAN	P02538	K.FASFIDKVR.F	70.035	77	0.99315	1	0.60901	7.8125e-13
FASFIDKVR	K2C6B_HUMAN	P04259	K.FASFIDKVR.F	68.44	73	0.99315	1	0.60901	7.8125e-13
FASFIDKVR	K2C6C_HUMAN	P48668	K.FASFIDKVR.F	67.553	75	0.99315	1	0.60901	7.8125e-13
FASFIDKVR	K2C71_HUMAN	Q3SY84	K.FASFIDKVR.F	5.545	5	0.99315	1	0.60901	7.8125e-13
FASFIDKVR	K2C72_HUMAN	Q14CN4	K.FASFIDKVR.F	6.458	7	0.99315	1	0.60901	7.8125e-13
FASFIDKVR	K2C73_HUMAN	Q86Y46	K.FASFIDKVR.F	7.593	7	0.99315	1	0.60901	7.8125e-13
FASFIDKVR	K2C74_HUMAN	Q7RTS7	K.FASFIDKVR.F	3.97	4	0.99315	1	0.60901	7.8125e-13
FASFIDKVR	K2C75_HUMAN	O95678	K.FASFIDKVR.F	20.145	22	0.99315	1	0.60901	7.8125e-13
FASFIDKVR	K2C78_HUMAN	Q8N1N4	Q.FASFIDKVR.F	44.038	31	0.99315	1	0.60901	7.8125e-13
FASFIDKVR	K2C79_HUMAN	Q5XKE5	K.FASFIDKVR.F	13.084	12	0.99315	1	0.60901	7.8125e-13
FASFIDKVR	K2C7_HUMAN	P08729	K.FASFIDKVR.F	10.235	7	0.99315	1	0.60901	7.8125e-13
FASFIDKVR	K2C8_HUMAN	Q6P4C7	K.FASFIDKVR.F	10.145	9	0.99315	1	0.60901	7.8125e-13
FASFIDKVR	KRT84_HUMAN	Q9NSB2	K.FASFIDKVR.F	5.833	5	0.99315	1	0.60901	7.8125e-13
FAYGYIEDLK	ILEU_HUMAN	P30740	K.FAYGYIEDLK.C	59.367	17	0.99383	1	0.854388	3.90625e-14
FDEAMADLHTLSEDSYKDSTLIMQLLR	1433S_HUMAN	P31947	T.FDEAMADLHTLSEDSYKDSTLIMQLLR.D	64.919	17	0.99188	1	1.248	1.9337e-26
FDGILGMAYPR	CATD_HUMAN	P07339	K.FDGILGMAYPR.I	7.767	3	0.99241	1	1.07257	1.95313e-15
FDHILYTGSTGVGK	AL3A1_HUMAN	P30838	R.FDHILYTGSTGVGK.I	30.243	11	0.99283	1	1.73355	1.24512e-18
FDIAVDGEPLGR	PPIA_HUMAN	P62937	F.FDIAVDGEPLGR.V	43.03	9	0.98838	1	1.75071	5.73487e-14
FDLGQDVIDFTGHALALYR	GDIA_HUMAN	P31150	K.FDLGQDVIDFTGHALALYR.T	10.962	4	0.99234	1	1.23907	1.0209e-14
FDLGQDVIDFTGHALALYR	GDIB_HUMAN	P50395	K.FDLGQDVIDFTGHALALYR.T	19.101	7	0.99234	1	1.23907	1.0209e-14
FDLVPVPTNLYGDFFTGDAYVILK	GELS_HUMAN	P06396	K.FDLVPVPTNLYGDFFTGDAYVILK.T	20.077	11	0.99339	1	1.50611	1.06711e-25
FDRNPELQNLLLDDFFK	6PGD_HUMAN	P52209	A.FDRNPELQNLLLDDFFK.S	41.615	17	0.99348	1	1.04354	4.40563e-16
FDVSSTSVFK	NIBL1_HUMAN	Q96TA1	R.FDVSSTSVFK.Q	12.824	6	0.99027	1	1.03016	5.85938e-14
FEDENFILK	PPIA_HUMAN	P62937	K.FEDENFILK.H	43.03	9	0.99236	1	0.797441	7.8125e-13
FEELNADLFR	HSP72_HUMAN	P54652	R.FEELNADLFR.G	17.84	11	0.99352	1	1.4924	3.90625e-14
FEELNADLFR	HSP7C_HUMAN	P11142	R.FEELNADLFR.G	39.783	24	0.99352	1	1.4924	3.90625e-14
FENAFLSHVVSQHQALLGTIR	ATPA_HUMAN	P25705	K.FENAFLSHVVSQHQALLGTIR.A	20.253	7	0.99355	1	1.59172	1.86633e-18
FEVGDIMLIR	PNPH_HUMAN	P00491	K.FEVGDIMLIR.D	14.879	4	0.99222	1	1.47806	1.58789e-13
FEVQVTVPK	A2MG_HUMAN	P01023	K.FEVQVTVPK.I	24.763	26	0.99341	1	1.32185	3.90625e-13
FFEHFIEGGR	OTUB1_HUMAN	Q96FW1	K.FFEHFIEGGR.T	10.701	2	0.99315	1	1.01173	1.61997e-12
FFESFGDLSTPDAVMGNPK	HBB_HUMAN	Q549N7	R.FFESFGDLSTPDAVMGNPK.V	80.952	12	0.99266	1	0.426251	1.17577e-23
FFGHGAEDSLADQAANEWGR	SAA_HUMAN	Q6FG67	R.FFGHGAEDSLADQAANEWGR.S	27.869	2	0.99283	1	0.989271	3.42513e-22
FFGTFLPEVAK	BPI_HUMAN	Q9H203	K.FFGTFLPEVAK.K	10.062	4	0.99221	1	1.58528	1.46484e-15
FFQSLDGIMFINK	ISK5_HUMAN	Q9NQ38	K.FFQSLDGIMFINK.C	4.229	4	0.99287	1	0.622921	1.95313e-17
FFVGGNWK	TPIS_HUMAN	P60174	K.FFVGGNWK.M	53.012	9	0.84094	1	0.67427	2.01172e-11
FGAQLAHIQALISGIEAQLGDVR	K1C19_HUMAN	Q9P1Y4	R.FGAQLAHIQALISGIEAQLGDVR.A	40	16	0.99018	1	1.42833	1.40762e-21
FGDPVVQSDMK	HSP71_HUMAN	P08107	K.FGDPVVQSDMK.H	43.058	20	0.99389	1	0.747481	1.51367e-15
FGDRFPAMSDAYDR	PNPH_HUMAN	P00491	R.FGDRFPAMSDAYDR.T	14.879	4	0.99205	1	1.53281	3.37994e-13
FGDSNTVMR	DESP_HUMAN	P15924	K.FGDSNTVMR.F	49.739	138	0.9933	1	1.29776	1.95313e-13
FGFPEGSVELYAEK	RS3_HUMAN	P23396	R.FGFPEGSVELYAEK.V	16.049	4	0.99218	1	0.445045	1.40839e-19
FGHLEVPSSMFR	PERL_HUMAN	P22079	R.FGHLEVPSSMFR.L	32.865	16	0.99346	1	1.02178	1.70898e-15
FGPGVAFR	K1C19_HUMAN	Q9P1Y4	R.FGPGVAFR.A	40	16	0.99222	1	1.57113	3.90625e-12
FGQGSGPIVLDDVR	DMBT1_HUMAN	Q9Y4V9	Q.FGQGSGPIVLDDVR.C	14.463	9	0.99318	1	0.195647	4.88281e-18
FGVEQDVDMVFASFIR	KPYM_HUMAN	Q9BWB5	K.FGVEQDVDMVFASFIR.K	49.153	22	0.9933	1	1.36597	1.4666e-19
FGYGYGPY	STAT_HUMAN	P02808	R.FGYGYGPY.Q	48.387	9	0.99277	1	-0.0922607	4.29688e-12
FGYGYGPYQPVPEQP	STAT_HUMAN	P02808	R.FGYGYGPYQPVPEQP.L	48.387	9	0.9928	1	0.836213	1.42448e-15
FGYGYGPYQPVPEQPL	STAT_HUMAN	P02808	R.FGYGYGPYQPVPEQPL.Y	48.387	9	0.99273	1	0.162741	1.68622e-17
FGYGYGPYQPVPEQPLYPQP	STAT_HUMAN	P02808	R.FGYGYGPYQPVPEQPLYPQP.Y	48.387	9	0.99101	1	0.659471	1.75355e-16
FGYGYGPYQPVPEQPLYPQPY	STAT_HUMAN	P02808	R.FGYGYGPYQPVPEQPLYPQPY.Q	48.387	9	0.99261	1	0.5532	1.12258e-14
FGYGYGPYQPVPEQPLYPQPYQPQ	STAT_HUMAN	P02808	R.FGYGYGPYQPVPEQPLYPQPYQPQ.Y	48.387	9	0.99239	1	0.326172	1.21392e-15
FGYGYGPYQPVPEQPLYPQPYQPQY	STAT_HUMAN	P02808	R.FGYGYGPYQPVPEQPLYPQPYQPQY.Q	48.387	9	0.99303	1	1.0108	6.64628e-18
FGYGYGPYQPVPEQPLYPQPYQPQYQQYT	STAT_HUMAN	P02808	R.FGYGYGPYQPVPEQPLYPQPYQPQYQQYT.F	48.387	9	0.99285	1	0.106562	1.41411e-20
FGYGYGPYQPVPEQPLYPQPYQPQYQQYTF	STAT_HUMAN	P02808	R.FGYGYGPYQPVPEQPLYPQPYQPQYQQYTF.-	48.387	9	0.99268	1	0.542129	6.00095e-19
FHDFLGDSWGILFSHPR	PRDX6_HUMAN	P30041	R.FHDFLGDSWGILFSHPR.D	41.071	6	0.99308	1	0.95267	6.32096e-22
FHEQPELQKK	CYTN_HUMAN	P01037	A.FHEQPELQKK.Q	62.411	13	0.9587	1	0.684511	1.72992e-11
FHEQPELQKK	CYTS_HUMAN	P01036	A.FHEQPELQKK.Q	60.993	15	0.9587	1	0.684511	1.72992e-11
FHEQPELQKK	CYTT_HUMAN	P09228	A.FHEQPELQKK.Q	41.135	8	0.9587	1	0.684511	1.72992e-11
FIENEEQEYVQTVK	ANXA1_HUMAN	P04083	W.FIENEEQEYVQTVK.S	67.052	42	0.99214	1	0.519934	4.88281e-18
FISDHSITR	DMBT1_HUMAN	Q9Y4V9	R.FISDHSITR.R	14.463	9	0.99378	1	1.46397	7.8125e-13
FISDHSITRR	DMBT1_HUMAN	Q9Y4V9	R.FISDHSITRR.G	14.463	9	0.66928	0.777343	1.66433	7.6073e-12
FISDKDASIVGFFDDSFSEAHSEFLK	PDIA3_HUMAN	P30101	K.FISDKDASIVGFFDDSFSEAHSEFLK.A	16.832	6	0.99387	1	0.999499	4.09225e-30
FITHAPPGEFNEVFNDVR	CAZA1_HUMAN	P52907	K.FITHAPPGEFNEVFNDVR.L	9.79	2	0.9927	1	1.4625	5.87783e-15
FKDLGEENFK	ALBU_HUMAN	Q9P157	R.FKDLGEENFK.A	41.544	47	0.99366	1	0.997717	3.90625e-14
FKEANNFLWPFK	RL7_HUMAN	P18124	R.FKEANNFLWPFK.L	14.919	3	0.98905	1	1.2829	5.75334e-12
FKIPGSPPESMGR	GDIB_HUMAN	P50395	R.FKIPGSPPESMGR.G	19.101	7	0.98608	1	1.98658	4.99784e-12
FKLEESYTLNSDLAR	ILEU_HUMAN	P30740	R.FKLEESYTLNSDLAR.L	59.367	17	0.99298	1	0.932884	1.2433e-17
FKVEESYDLKDTLR	SPB3_HUMAN	Q8IXI3	R.FKVEESYDLKDTLR.T	42.821	15	0.99335	1	1.34481	8.35765e-17
FKVEVVEPK	A2ML1_HUMAN	A8K2U0	K.FKVEVVEPK.E	27.854	29	0.99166	1	0.86018	1.17188e-12
FLASVSTVLTSK	HBA_HUMAN	P69905	K.FLASVSTVLTSK.Y	85.915	14	0.99386	1	0.943911	9.76563e-17
FLDQNLQK	DESP_HUMAN	P15924	K.FLDQNLQK.Y	49.739	138	0.98321	1	0.756573	9.60938e-11
FLEFQYLTGGLVDPEVHGR	DESP_HUMAN	P15924	R.FLEFQYLTGGLVDPEVHGR.I	49.739	138	0.9936	1	0.682783	5.42846e-23
FLENEDRR	A1AT_HUMAN	Q86U18	K.FLENEDRR.S	39.952	14	0.9651	1	0.77335	2.62568e-11
FLEQQNQVLQTK	K22E_HUMAN	P35908	R.FLEQQNQVLQTK.W	40.845	30	0.9915	1	0.0398026	1.6416e-15
FLEQQNQVLQTK	K2C1B_HUMAN	Q7Z794	V.FLEQQNQVLQTK.W	7.093	5	0.9915	1	0.0398026	1.6416e-15
FLEQQNQVLQTK	K2C1_HUMAN	P04264	R.FLEQQNQVLQTK.W	66.77	58	0.9915	1	0.0398026	1.6416e-15
FLGMFLYEYAR	ALBU_HUMAN	Q9P157	V.FLGMFLYEYAR.R	41.544	47	0.98379	1	1.51127	2.15332e-14
FLIPNASQAESK	1433Z_HUMAN	Q6NUR9	K.FLIPNASQAESK.V	53.878	14	0.99331	1	0.609507	1.95313e-16
FLIPNASQAESKV	1433Z_HUMAN	Q6NUR9	K.FLIPNASQAESKV.F	53.878	14	0.98989	1	0.884622	2.53347e-12
FLMANGQLVK	GDIA_HUMAN	P31150	K.FLMANGQLVK.M	10.962	4	0.99268	1	1.29599	9.52244e-12
FLMANGQLVK	GDIB_HUMAN	P50395	K.FLMANGQLVK.M	19.101	7	0.99268	1	1.29599	9.52244e-12
FLQHKDDNPNLPR	ALBU_HUMAN	Q9P157	C.FLQHKDDNPNLPR.L	41.544	47	0.99232	1	1.15425	8.87324e-16
FLSQPFQVAEVFTGHMGK	ATPB_HUMAN	P06576	R.FLSQPFQVAEVFTGHMGK.L	30.435	10	0.98952	1	1.3449	6.80678e-15
FLTLAEDILR	RAB10_HUMAN	P61026	A.FLTLAEDILR.K	17	4	0.99238	1	1.76906	3.90625e-12
FMETVAEK	CLUS_HUMAN	P10909	K.FMETVAEK.A	18.931	6	0.9927	1	2.01352	3.90625e-12
FMFDLFQQFR	SPB3_HUMAN	Q8IXI3	K.FMFDLFQQFR.K	42.821	15	0.9936	1	2.18524	7.8125e-14
FMFDLFQQFR	SPB4_HUMAN	P48594	K.FMFDLFQQFR.K	27.179	10	0.9936	1	2.18524	7.8125e-14
FMFDLFQQFRK	SPB3_HUMAN	Q8IXI3	K.FMFDLFQQFRK.S	42.821	15	0.99307	1	0.915159	1.60672e-14
FMFDLFQQFRK	SPB4_HUMAN	P48594	K.FMFDLFQQFRK.S	27.179	10	0.99307	1	0.915159	1.60672e-14
FNADEFEDMVAEKR	RL10_HUMAN	P27635	K.FNADEFEDMVAEKR.L	12.15	2	0.99264	1	1.18017	4.62444e-15
FNTANDDNVTQVR	CATA_HUMAN	P04040	R.FNTANDDNVTQVR.A	7.78	3	0.99203	1	0.857981	3.40225e-18
FNWYVDGVEV	IGHG1_HUMAN	P01857	K.FNWYVDGVEV.H	34.848	16	0.99021	1	1.26272	7.04874e-12
FNWYVDGVEV	IGHG2_HUMAN	P01859	Q.FNWYVDGVEV.H	30.982	12	0.99021	1	1.26272	7.04874e-12
FNWYVDGVEV	IGHG4_HUMAN	P01861	Q.FNWYVDGVEV.H	29.052	14	0.99021	1	1.26272	7.04874e-12
FNWYVDGVEVHNAK	IGHG1_HUMAN	P01857	K.FNWYVDGVEVHNAK.T	34.848	16	0.99325	1	0.641641	6.10352e-20
FNWYVDGVEVHNAK	IGHG2_HUMAN	P01859	Q.FNWYVDGVEVHNAK.T	30.982	12	0.99325	1	0.641641	6.10352e-20
FNWYVDGVEVHNAK	IGHG4_HUMAN	P01861	Q.FNWYVDGVEVHNAK.T	29.052	14	0.99325	1	0.641641	6.10352e-20
FPGQLNADLR	TBB1_HUMAN	Q9H4B7	R.FPGQLNADLR.K	6.43	4	0.98583	1	1.07482	6.16973e-12
FPGQLNADLR	TBB2A_HUMAN	Q13885	R.FPGQLNADLR.K	42.247	18	0.98583	1	1.07482	6.16973e-12
FPGQLNADLR	TBB3_HUMAN	Q13509	R.FPGQLNADLR.K	26.889	12	0.98583	1	1.07482	6.16973e-12
FPGQLNADLR	TBB5_HUMAN	P07437	R.FPGQLNADLR.K	40.09	16	0.98583	1	1.07482	6.16973e-12
FPGQLNADLR	TBB8B_HUMAN	A6NNZ2	R.FPGQLNADLR.K	9.685	5	0.98583	1	1.07482	6.16973e-12
FPGQLNADLR	TBB8_HUMAN	Q3ZCM7	R.FPGQLNADLR.K	13.063	6	0.98583	1	1.07482	6.16973e-12
FPGQLNADLR	YI016_HUMAN	A6NKZ8	R.FPGQLNADLR.K	11.559	5	0.98583	1	1.07482	6.16973e-12
FPGQLNADLRK	TBB1_HUMAN	Q9H4B7	R.FPGQLNADLRK.L	6.43	4	0.98526	1	1.01425	5.24851e-13
FPGQLNADLRK	TBB2A_HUMAN	Q13885	R.FPGQLNADLRK.L	42.247	18	0.98526	1	1.01425	5.24851e-13
FPGQLNADLRK	TBB3_HUMAN	Q13509	R.FPGQLNADLRK.L	26.889	12	0.98526	1	1.01425	5.24851e-13
FPGQLNADLRK	TBB5_HUMAN	P07437	R.FPGQLNADLRK.L	40.09	16	0.98526	1	1.01425	5.24851e-13
FPGQLNADLRK	TBB8B_HUMAN	A6NNZ2	R.FPGQLNADLRK.L	9.685	5	0.98526	1	1.01425	5.24851e-13
FPGQLNADLRK	TBB8_HUMAN	Q3ZCM7	R.FPGQLNADLRK.L	13.063	6	0.98526	1	1.01425	5.24851e-13
FPGQLNADLRK	YI016_HUMAN	A6NKZ8	R.FPGQLNADLRK.L	11.559	5	0.98526	1	1.01425	5.24851e-13
FPSIVGRPR	ACTA_HUMAN	P62736	V.FPSIVGRPR.H	46.154	28	0.98792	1	0.521218	3.90625e-12
FPSIVGRPR	ACTBM_HUMAN	Q9BYX7	V.FPSIVGRPR.H	24	15	0.98792	1	0.521218	3.90625e-12
FPSIVGRPR	ACTB_HUMAN	Q96HG5	V.FPSIVGRPR.H	80.8	48	0.98792	1	0.521218	3.90625e-12
FPSIVGRPR	ACTC_HUMAN	P68032	V.FPSIVGRPR.H	48.806	32	0.98792	1	0.521218	3.90625e-12
FPSIVGRPR	ACTG_HUMAN	P63261	V.FPSIVGRPR.H	80.8	48	0.98792	1	0.521218	3.90625e-12
FPSIVGRPR	ACTH_HUMAN	P63267	V.FPSIVGRPR.H	46.277	28	0.98792	1	0.521218	3.90625e-12
FPSIVGRPR	ACTS_HUMAN	P68133	V.FPSIVGRPR.H	45.093	30	0.98792	1	0.521218	3.90625e-12
FPSIVGRPR	POTEE_HUMAN	Q6S8J3	V.FPSIVGRPR.Q	12.186	18	0.98792	1	0.521218	3.90625e-12
FPSIVGRPR	POTEF_HUMAN	A5A3E0	V.FPSIVGRPR.Q	10.512	17	0.98792	1	0.521218	3.90625e-12
FPSVSLQEASSFF	PROL4_HUMAN	Q16378	R.FPSVSLQEASSFF.R	19.403	5	0.99283	1	0.74016	8.49798e-15
FQDGDLTLYQSNTILR	GSTP1_HUMAN	P09211	K.FQDGDLTLYQSNTILR.H	65.714	12	0.99292	1	0.541493	1.05042e-20
FQELIFEDFAR	NIBL1_HUMAN	Q96TA1	R.FQELIFEDFAR.F	12.824	6	0.99383	1	0.73163	2.37769e-14
FQLFGSPSGQK	TRFL_HUMAN	Q8TCD2	K.FQLFGSPSGQK.D	34.085	34	0.99336	1	0.722248	3.90625e-15
FQLFGSPSGQKDLLFK	TRFL_HUMAN	Q8TCD2	K.FQLFGSPSGQKDLLFK.D	34.085	34	0.99132	1	1.3823	4.08481e-18
FQLFGSPSGQKDLLFKDSAIGFSR	TRFL_HUMAN	Q8TCD2	K.FQLFGSPSGQKDLLFKDSAIGFSR.V	34.085	34	0.99268	1	0.9043	2.39154e-19
FQMEDLVYNPEQVPR	A2ML1_HUMAN	A8K2U0	K.FQMEDLVYNPEQVPR.Y	27.854	29	0.9925	1	0.968945	1.81281e-18
FQNALLVR	ALBU_HUMAN	Q9P157	K.FQNALLVR.Y	41.544	47	0.99316	1	1.17523	3.125e-11
FQNSLKELQLQK	DESP_HUMAN	P15924	R.FQNSLKELQLQK.Q	49.739	138	0.99339	1	1.30742	3.75196e-15
FQSAAIGALQEASEAYLV	H33_HUMAN	P84243	R.FQSAAIGALQEASEAYLV.G	21.324	2	0.99057	1	1.28981	1.79176e-15
FQSLGVAFYR	RAB7A_HUMAN	P51149	R.FQSLGVAFYR.G	16.425	3	0.99281	1	0.860348	3.90625e-14
FQSLNADINKR	ILEU_HUMAN	P30740	R.FQSLNADINKR.G	59.367	17	0.99297	1	0.566497	1.71074e-14
FQVDNNNR	A2MG_HUMAN	P01023	K.FQVDNNNR.L	24.763	26	0.9815	1	0.555565	5.47852e-11
FRLPPGEYVVVPSTFEPNKEGDFVLR	CAN1_HUMAN	P07384	R.FRLPPGEYVVVPSTFEPNKEGDFVLR.F	16.807	9	0.99207	1	1.03405	3.31831e-19
FSAFIKNPVPAQDEALYQQLLR	CLIC3_HUMAN	O95833	K.FSAFIKNPVPAQDEALYQQLLR.A	23.305	3	0.99312	1	1.86472	1.41443e-18
FSALEVDETYVPK	ALBU_HUMAN	Q9P157	C.FSALEVDETYVPK.E	41.544	47	0.99347	1	0.821051	2.44141e-17
FSGSGSGTDFTLK	KV201_HUMAN	P01614	R.FSGSGSGTDFTLK.I	17.391	2	0.9936	1	1.03861	2.44141e-18
FSGSGSGTDFTLK	KV204_HUMAN	P01617	R.FSGSGSGTDFTLK.I	17.699	2	0.9936	1	1.03861	2.44141e-18
FSGSGSGTDFTLK	KV205_HUMAN	P06309	R.FSGSGSGTDFTLK.I	17.094	2	0.9936	1	1.03861	2.44141e-18
FSGSGSGTDFTLK	KV206_HUMAN	P06310	R.FSGSGSGTDFTLK.I	15.038	2	0.9936	1	1.03861	2.44141e-18
FSGSGSGTDFTLTI	KV302_HUMAN	P01620	R.FSGSGSGTDFTLTI.S	39.45	4	0.99253	1	0.896413	5.98528e-12
FSGSGSGTDFTLTI	KV305_HUMAN	P01623	R.FSGSGSGTDFTLTI.S	39.45	4	0.99253	1	0.896413	5.98528e-12
FSGSGSGTDFTLTI	KV309_HUMAN	P04433	R.FSGSGSGTDFTLTI.S	35.652	3	0.99253	1	0.896413	5.98528e-12
FSGSGSGTDFTLTI	KV312_HUMAN	P18135	R.FSGSGSGTDFTLTI.S	50.388	5	0.99253	1	0.896413	5.98528e-12
FSGSGSGTDFTLTI	KV313_HUMAN	P18136	R.FSGSGSGTDFTLTI.S	50.388	5	0.99253	1	0.896413	5.98528e-12
FSGSGSGTDFTLTI	KV401_HUMAN	P06312	R.FSGSGSGTDFTLTI.S	46.281	4	0.99253	1	0.896413	5.98528e-12
FSGSGSGTDFTLTI	KV402_HUMAN	P01625	R.FSGSGSGTDFTLTI.S	49.123	4	0.99253	1	0.896413	5.98528e-12
FSGSGSGTDFTLTI	KV403_HUMAN	P06313	R.FSGSGSGTDFTLTI.S	42.105	4	0.99253	1	0.896413	5.98528e-12
FSGSGSGTDFTLTI	KV404_HUMAN	P06314	R.FSGSGSGTDFTLTI.S	41.791	4	0.99253	1	0.896413	5.98528e-12
FSGSGSGTDFTLTISR	KV302_HUMAN	P01620	R.FSGSGSGTDFTLTISR.L	39.45	4	0.9921	1	-0.0155046	6.10352e-22
FSGSGSGTDFTLTISR	KV305_HUMAN	P01623	R.FSGSGSGTDFTLTISR.L	39.45	4	0.9921	1	-0.0155046	6.10352e-22
FSGSGSGTDFTLTISR	KV312_HUMAN	P18135	R.FSGSGSGTDFTLTISR.L	50.388	5	0.9921	1	-0.0155046	6.10352e-22
FSGSGSGTDFTLTISR	KV313_HUMAN	P18136	R.FSGSGSGTDFTLTISR.L	50.388	5	0.9921	1	-0.0155046	6.10352e-22
FSGWYDADLSPAGHEEAK	PGAM1_HUMAN	P18669	R.FSGWYDADLSPAGHEEAK.R	42.913	9	0.99315	1	0.623437	9.76165e-20
FSIEEALQSGR	PEPL_HUMAN	O60437	K.FSIEEALQSGR.L	32.517	52	0.99301	1	0.861838	3.90625e-15
FSLVGIGGQDLNEGNR	PLSL_HUMAN	P13796	K.FSLVGIGGQDLNEGNR.T	25.359	10	0.99284	1	0.607404	1.23261e-20
FSLVPHNYGLVLYENK	NIBL1_HUMAN	Q96TA1	R.FSLVPHNYGLVLYENK.A	12.824	6	0.99058	1	1.93638	2.50682e-15
FSMPGFK	AHNK_HUMAN	Q09666	K.FSMPGFK.A	19.508	36	0.95065	1	0.986104	7.8125e-11
FSMPGFKAEGPEVDVNLPK	AHNK_HUMAN	Q09666	K.FSMPGFKAEGPEVDVNLPK.A	19.508	36	0.9935	1	1.3142	8.32686e-19
FSMPGFKGEGPDVDVNLPK	AHNK_HUMAN	Q09666	K.FSMPGFKGEGPDVDVNLPK.A	19.508	36	0.99291	1	1.39612	1.22943e-18
FSMPGFKGEGPEVDVNLPK	AHNK_HUMAN	Q09666	K.FSMPGFKGEGPEVDVNLPK.A	19.508	36	0.99048	1	0.980944	1.09862e-13
FSMPSLKGEGPEVDVNLPK	AHNK_HUMAN	Q09666	K.FSMPSLKGEGPEVDVNLPK.A	19.508	36	0.99147	1	1.92718	7.74429e-15
FSMVVQDGIVK	PRDX5_HUMAN	P30044	R.FSMVVQDGIVK.A	39.252	7	0.99337	1	0.807028	1.95313e-15
FSQSSQSSQR	K2C3_HUMAN	P12035	K.FSQSSQSSQR.Y	32.006	23	0.99379	1	2.0795	7.8125e-14
FSQTTSSSQHSSTK	K22O_HUMAN	Q01546	R.FSQTTSSSQHSSTK.-	46.082	34	0.99301	1	2.1689	2.44141e-19
FSSQELILR	TGM3_HUMAN	Q08188	K.FSSQELILR.R	58.297	45	0.9926	1	1.20026	3.125e-12
FSSYSQMENWSR	PKP1_HUMAN	Q13835	R.FSSYSQMENWSR.H	30.254	18	0.9933	1	0.371029	4.88281e-17
FSVNLDVK	CRYAB_HUMAN	P02511	R.FSVNLDVK.H	42.857	5	0.9923	1	0.886587	7.8125e-12
FSVSPVVR	EF2_HUMAN	P13639	K.FSVSPVVR.V	33.566	23	0.96428	1	1.09522	3.90625e-12
FTASAGIQVVGDDLTVTNPK	ENOA_HUMAN	Q6GMP2	K.FTASAGIQVVGDDLTVTNPK.R	64.977	24	0.99325	1	1.45804	2.80786e-21
FTDEEVDELYR	ML12A_HUMAN	P19105	R.FTDEEVDELYR.E	18.713	3	0.99324	1	0.547919	9.76563e-16
FTDTRKDEQER	EF2_HUMAN	P13639	R.FTDTRKDEQER.C	33.566	23	0.97412	1	0.770193	5.87497e-11
FTEVYAINR	PEPL_HUMAN	O60437	K.FTEVYAINR.Q	32.517	52	0.99345	1	1.39164	3.90625e-13
FTPGTFTNQIQAAFR	RSSA_HUMAN	Q86VC0	R.FTPGTFTNQIQAAFR.E	12.203	3	0.99056	1	0.0644932	1.24089e-14
FTQAGSEVSALLGR	ATPB_HUMAN	P06576	R.FTQAGSEVSALLGR.I	30.435	10	0.9831	1	0.639416	9.38285e-12
FVADGIFKAELNEFLTR	RS3_HUMAN	P23396	K.FVADGIFKAELNEFLTR.E	16.049	4	0.98749	1	1.01121	6.50847e-17
FVFSLVDAMNGK	MDHM_HUMAN	P40926	R.FVFSLVDAMNGK.E	27.219	7	0.99391	1	1.29957	4.88281e-17
FVMQEEFSR	PDIA3_HUMAN	P30101	K.FVMQEEFSR.D	16.832	6	0.99327	1	0.726484	3.90625e-13
FVNSVINTLK	SPLC2_HUMAN	Q96DR5	K.FVNSVINTLK.S	49.799	15	0.99388	1	0.735063	5.85938e-14
FVSISDLLVPK	GDIB_HUMAN	P50395	K.FVSISDLLVPK.D	19.101	7	0.99232	1	1.11777	3.90625e-15
FVSSGSGGGYGGGMR	K1C15_HUMAN	P19012	R.FVSSGSGGGYGGGMR.V	27.412	19	0.99266	1	1.16565	3.05176e-21
FVSTTSSSR	K2C5_HUMAN	P13647	K.FVSTTSSSR.K	65.932	71	0.99153	1	1.23012	1.95313e-13
FVSTTSSSRK	K2C5_HUMAN	P13647	K.FVSTTSSSRK.S	65.932	71	0.991	1	1.64614	6.98242e-14
FVSTTYSGVTR	K2C1_HUMAN	P04264	K.FVSTTYSGVTR.-	66.77	58	0.99366	1	0.598714	4.88281e-16
FVYPLDFAR	ADT1_HUMAN	P12235	C.FVYPLDFAR.T	7.047	2	0.93142	1	1.40966	7.8125e-12
FVYPLDFAR	ADT2_HUMAN	P05141	C.FVYPLDFAR.T	14.43	4	0.93142	1	1.40966	7.8125e-12
FVYPLDFAR	ADT3_HUMAN	P12236	C.FVYPLDFAR.T	14.43	4	0.93142	1	1.40966	7.8125e-12
FWAPESAPLK	COF1_HUMAN	P23528	I.FWAPESAPLK.S	50	7	0.92751	1	1.12066	3.32031e-13
FWAPESAPLK	COF2_HUMAN	Q9Y281	I.FWAPESAPLK.S	18.675	4	0.92751	1	1.12066	3.32031e-13
FWWENPGVFTNEQK	PERL_HUMAN	P22079	R.FWWENPGVFTNEQK.D	32.865	16	0.99244	1	0.85702	1.2207e-19
FWWENPGVFTNEQKDSLQK	PERL_HUMAN	P22079	R.FWWENPGVFTNEQKDSLQK.M	32.865	16	0.99309	1	1.06351	1.43596e-19
FYAPELLFFAK	ALBU_HUMAN	Q9P157	Y.FYAPELLFFAK.R	41.544	47	0.99296	1	1.24867	1.95313e-14
FYGDEEKDKGLQTSQDAR	CALR_HUMAN	P27797	K.FYGDEEKDKGLQTSQDAR.F	16.067	4	0.9922	1	1.73623	9.713e-21
FYGDYGSNYLYDN	HIS1_HUMAN	P15515	P.FYGDYGSNYLYDN.-	28.07	7	0.99123	1	0.595484	1.55837e-14
FYHPEKEDGKLNK	CO3_HUMAN	P01024	R.FYHPEKEDGKLNK.L	20.204	22	0.99264	1	1.55818	2.78127e-14
FYPEDVAEELIQDITQK	EZRI_HUMAN	P15311	K.FYPEDVAEELIQDITQK.L	26.28	13	0.99055	1	1.37958	1.24408e-20
FYTIEILK	PIP_HUMAN	P12273	R.FYTIEILK.V	52.74	9	0.993	1	1.12483	3.125e-11
FYTIEILKVE	PIP_HUMAN	P12273	R.FYTIEILKVE.-	52.74	9	0.9929	1	0.763665	1.5625e-13
FYYEILNSPEK	1433B_HUMAN	P31946	V.FYYEILNSPEK.A	36.179	8	0.99279	1	0.645439	1.95313e-14
FYYEILNSPEK	1433Z_HUMAN	Q6NUR9	V.FYYEILNSPEK.A	53.878	14	0.99279	1	0.645439	1.95313e-14
GADFLVTEVENGGSLGSK	KPYM_HUMAN	Q9BWB5	K.GADFLVTEVENGGSLGSK.K	49.153	22	0.99192	1	0.661263	1.89918e-20
GADVWFK	S10A8_HUMAN	P05109	K.GADVWFK.E	88.172	8	0.99221	1	1.21328	8.20313e-11
GADVWFKELDINTDGAVNFQEFLILVIKMGVAAHKKSHEESHKE	S10A8_HUMAN	P05109	K.GADVWFKELDINTDGAVNFQEFLILVIKMGVAAHKKSHEESHKE.-	88.172	8	0.99244	1	0.806562	2.06437e-18
GAFGKPQGTVAR	RL10_HUMAN	P27635	R.GAFGKPQGTVAR.V	12.15	2	0.99191	1	0.500656	5.22976e-11
GAFSSVSMSGGAGR	K2C4_HUMAN	P19013	R.GAFSSVSMSGGAGR.C	74.532	75	0.99389	1	0.649114	1.61878e-16
GAGAFGYFEVTHDITK	CATA_HUMAN	P04040	K.GAGAFGYFEVTHDITK.Y	7.78	3	0.98843	1	1.24324	2.41832e-13
GAGHHHTLDSCRG	DSC2_HUMAN	Q02487	R.GAGHHHTLDSCRG.G	10.544	6	0.98972	1	1.71403	3.59378e-13
GAGSIAGASASPK	DESP_HUMAN	P15924	R.GAGSIAGASASPK.E	49.739	138	0.99313	1	0.73162	2.44141e-18
GAGTNEDALIEILTTR	ANXA3_HUMAN	P12429	K.GAGTNEDALIEILTTR.T	31.579	8	0.99386	1	0.862414	1.16535e-15
GALQNIIPASTGAAK	G3P_HUMAN	P04406	R.GALQNIIPASTGAAK.A	65.97	33	0.9913	1	0.169268	2.50244e-18
GATQQILDEAER	TCPB_HUMAN	P78371	R.GATQQILDEAER.S	7.103	3	0.99115	1	0.604895	7.35276e-13
GAYPLSIEPIGVR	CERU_HUMAN	P00450	K.GAYPLSIEPIGVR.F	9.108	5	0.9937	1	1.00383	8.62793e-15
GDGVTHTVPIYEGYALPHAILR	ACTB_HUMAN	Q96HG5	S.GDGVTHTVPIYEGYALPHAILR.L	80.8	48	0.9932	1	0.902685	1.11081e-15
GDGVTHTVPIYEGYALPHAILR	ACTG_HUMAN	P63261	S.GDGVTHTVPIYEGYALPHAILR.L	80.8	48	0.9932	1	0.902685	1.11081e-15
GDLGIEIPAEK	KPYM_HUMAN	Q9BWB5	R.GDLGIEIPAEK.V	49.153	22	0.99394	1	0.953706	2.31494e-13
GDLGIEIPAEK	KPYR_HUMAN	P30613	R.GDLGIEIPAEK.V	2.091	2	0.99394	1	0.953706	2.31494e-13
GDLGIEIPAEKV	KPYM_HUMAN	Q9BWB5	R.GDLGIEIPAEKV.F	49.153	22	0.99187	1	1.15684	5.16081e-12
GDLGIEIPAEKV	KPYR_HUMAN	P30613	R.GDLGIEIPAEKV.F	2.091	2	0.99187	1	1.15684	5.16081e-12
GDQLILNLNNISSDR	LPLC1_HUMAN	Q9H4V6	K.GDQLILNLNNISSDR.I	45.041	20	0.99296	1	0.214022	7.8125e-19
GDRSEDFGVNEDLADSDAR	ANXA1_HUMAN	P04083	K.GDRSEDFGVNEDLADSDAR.A	67.052	42	0.9932	1	1.11705	4.80541e-17
GDTIQLYLGAK	LPLC1_HUMAN	Q9H4V6	K.GDTIQLYLGAK.L	45.041	20	0.99357	1	0.688839	7.8125e-15
GDYGSNYLYDN	HIS1_HUMAN	P15515	Y.GDYGSNYLYDN.-	28.07	7	0.99306	1	0.860571	1.05227e-13
GDYPLEAVR	KPYM_HUMAN	Q9BWB5	K.GDYPLEAVR.M	49.153	22	0.98632	1	1.32763	1.5625e-12
GEADAMSLDGGYVYTAGK	TRFL_HUMAN	Q8TCD2	K.GEADAMSLDGGYVYTAGK.C	34.085	34	0.99295	1	0.377315	4.8729e-22
GEGQLGPAER	EF2_HUMAN	P13639	K.GEGQLGPAER.A	33.566	23	0.99311	1	0.741733	2.22266e-12
GELALKDAQAK	K2C78_HUMAN	Q8N1N4	R.GELALKDAQAK.V	44.038	31	0.99089	1	0.377288	2.83223e-13
GELALKDAQAKVDELEAALR	K2C78_HUMAN	Q8N1N4	R.GELALKDAQAKVDELEAALR.M	44.038	31	0.99256	1	1.22754	3.81967e-23
GELALKDAR	K2C5_HUMAN	P13647	R.GELALKDAR.N	65.932	71	0.99059	1	2.09214	5.89844e-11
GELALKDAR	K2C75_HUMAN	O95678	R.GELALKDAR.A	20.145	22	0.99059	1	2.09214	5.89844e-11
GELALKDAR	K2C7_HUMAN	P08729	R.GELALKDAR.A	10.235	7	0.99059	1	2.09214	5.89844e-11
GEMALKDAK	K2C6A_HUMAN	P02538	R.GEMALKDAK.N	70.035	77	0.99212	1	0.848371	2.01807e-12
GEMALKDAK	K2C6B_HUMAN	P04259	R.GEMALKDAK.N	68.44	73	0.99212	1	0.848371	2.01807e-12
GEMALKDAK	K2C6C_HUMAN	P48668	R.GEMALKDAK.N	67.553	75	0.99212	1	0.848371	2.01807e-12
GENALKDAHSK	K2C4_HUMAN	P19013	R.GENALKDAHSK.R	74.532	75	0.99192	1	1.81373	5.87573e-14
GENALKDAHSKR	K2C4_HUMAN	P19013	R.GENALKDAHSKR.V	74.532	75	0.99308	1	1.94129	4.39453e-15
GENALKDAHSKRVELEAALQQAKEELAR	K2C4_HUMAN	P19013	R.GENALKDAHSKRVELEAALQQAKEELAR.M	74.532	75	0.99344	1	1.16483	3.62462e-22
GENALKDAK	K2C1_HUMAN	P04264	R.GENALKDAK.N	66.77	58	0.99243	1	1.71055	2.4627e-11
GFDEYMKELGVGIALRK	FABP5_HUMAN	Q01469	K.GFDEYMKELGVGIALRK.M	20.741	4	0.99226	1	1.32696	6.22226e-18
GFDNFEQLLSGAHWMDQHFR	G6PI_HUMAN	P06744	V.GFDNFEQLLSGAHWMDQHFR.T	38.351	14	0.99163	1	1.35377	8.12084e-17
GFFDPNTEENLTYLQLK	DESP_HUMAN	P15924	K.GFFDPNTEENLTYLQLK.E	49.739	138	0.99276	1	1.11816	2.1286e-20
GFGFVTFDDHDPVDKIVLQK	ROA2_HUMAN	P22626	R.GFGFVTFDDHDPVDKIVLQK.Y	9.348	2	0.99229	1	1.41265	2.15591e-12
GFGFVTYATVEEVDAAMNARPHK	ROA1_HUMAN	P09651	R.GFGFVTYATVEEVDAAMNARPHK.V	10.484	2	0.99387	1	1.84903	1.66281e-20
GFGGVQVSPPNENV	AMY1_HUMAN	P04745	K.GFGGVQVSPPNENV.A	65.362	60	0.99313	1	0.668728	1.214e-16
GFGGVQVSPPNENV	AMY2B_HUMAN	P19961	K.GFGGVQVSPPNENV.A	53.816	42	0.99313	1	0.668728	1.214e-16
GFGGVQVSPPNENV	AMYP_HUMAN	P04746	K.GFGGVQVSPPNENV.A	45.597	37	0.99313	1	0.668728	1.214e-16
GFGGVQVSPPNENVAIHNPFRPWWER	AMY1_HUMAN	P04745	K.GFGGVQVSPPNENVAIHNPFRPWWER.Y	65.362	60	0.99312	1	0.321896	6.02679e-19
GFGGVQVSPPNENVAIHNPFRPWWER	AMY2B_HUMAN	P19961	K.GFGGVQVSPPNENVAIHNPFRPWWER.Y	53.816	42	0.99312	1	0.321896	6.02679e-19
GFGLSPTVGLTAFKPFFVDLTLPYSVVR	A2ML1_HUMAN	A8K2U0	R.GFGLSPTVGLTAFKPFFVDLTLPYSVVR.G	27.854	29	0.99251	1	0.997804	3.08268e-23
GFIVFNNDDWTF	AMY1_HUMAN	P04745	R.GFIVFNNDDWTF.S	65.362	60	0.97268	1	2.14765	4.07459e-15
GFIVFNNDDWTF	AMY2B_HUMAN	P19961	R.GFIVFNNDDWTF.S	53.816	42	0.97268	1	2.14765	4.07459e-15
GFKDQIYDIFQK	IF4A1_HUMAN	P60842	R.GFKDQIYDIFQK.L	21.429	7	0.99153	1	1.30441	3.94531e-15
GFMLAHPYGFTR	AMY1_HUMAN	P04745	V.GFMLAHPYGFTR.V	65.362	60	0.99036	1	0.910455	4.88281e-16
GFMLAHPYGFTR	AMY2B_HUMAN	P19961	V.GFMLAHPYGFTR.V	53.816	42	0.99036	1	0.910455	4.88281e-16
GFMLAHPYGFTR	AMYP_HUMAN	P04746	V.GFMLAHPYGFTR.V	45.597	37	0.99036	1	0.910455	4.88281e-16
GFPFVPPSR	CD040_HUMAN	Q6MZM9	R.GFPFVPPSR.F	32.42	3	0.98845	1	1.20146	3.90625e-13
GFQALGDAADIR	TIMP1_HUMAN	P01033	K.GFQALGDAADIR.F	12.56	2	0.99291	1	0.673284	3.90625e-16
GFSPKDVLVR	IGHA1_HUMAN	P01876	R.GFSPKDVLVR.W	44.476	16	0.99177	1	1.24088	3.90625e-14
GFSPKDVLVR	IGHA2_HUMAN	P01877	R.GFSPKDVLVR.W	36.176	13	0.99177	1	1.24088	3.90625e-14
GFSSGSAVVSGGSR	K22E_HUMAN	P35908	R.GFSSGSAVVSGGSR.R	40.845	30	0.9925	1	0.890795	1.2207e-19
GFYPSDIAVEWESNGQPENNYK	IGHG1_HUMAN	P01857	K.GFYPSDIAVEWESNGQPENNYK.T	34.848	16	0.99279	1	0.802989	1.15218e-20
GFYPSDIAVEWESNGQPENNYK	IGHG4_HUMAN	P01861	K.GFYPSDIAVEWESNGQPENNYK.T	29.052	14	0.99279	1	0.802989	1.15218e-20
GGDSEQFIDEER	PRPC_HUMAN	P02810	D.GGDSEQFIDEER.Q	51.807	18	0.99176	1	0.816686	2.05078e-14
GGGFGGGSSFGGGSGFSGGGFGGGGFGGGR	K22E_HUMAN	P35908	R.GGGFGGGSSFGGGSGFSGGGFGGGGFGGGR.F	40.845	30	0.99354	1	0.501707	1.33453e-30
GGGGGGYGSGGSSYGSGGGSYGSGGGGGGGR	K2C1_HUMAN	P04264	R.GGGGGGYGSGGSSYGSGGGSYGSGGGGGGGR.G	66.77	58	0.99275	1	0.755956	7.04709e-28
GGGGGIGGGFGGGSSGFSGGSGFGSISGAR	K2C3_HUMAN	P12035	R.GGGGGIGGGFGGGSSGFSGGSGFGSISGAR.Y	32.006	23	0.99227	1	0.491415	2.95172e-31
GGGGGSFGAGGGFGSR	K2C1_HUMAN	P04264	C.GGGGGSFGAGGGFGSR.S	66.77	58	0.99257	1	0.618746	1.52588e-21
GGPGSAVSPYPTFNPSSDVAALHK	ANXA1_HUMAN	P04083	K.GGPGSAVSPYPTFNPSSDVAALHK.A	67.052	42	0.99036	1	-0.196888	1.13737e-19
GGRPHRPPQGQPPQ	PRB3_HUMAN	Q04118	Q.GGRPHRPPQGQPPQ.-	17.476	9	0.98952	1	0.000663229	1.04716e-14
GGRPQGPPQGQSPQ	PRPC_HUMAN	P02810	Q.GGRPQGPPQGQSPQ.-	51.807	18	0.96643	1	-0.543652	6.05416e-15
GGSFQLNELQGLK	TRFL_HUMAN	Q8TCD2	K.GGSFQLNELQGLK.S	34.085	34	0.99331	1	0.680063	1.44094e-13
GGVEDEVTLSAYITIALLEIPLTVTHPVVR	A2MG_HUMAN	P01023	K.GGVEDEVTLSAYITIALLEIPLTVTHPVVR.N	24.763	26	0.99291	1	0.980665	1.27188e-20
GGVNYFFDVEVGR	CYTN_HUMAN	P01037	V.GGVNYFFDVEVGR.T	62.411	13	0.99329	1	0.579546	2.0752e-17
GGVNYFFDVEVGR	CYTS_HUMAN	P01036	F.GGVNYFFDVEVGR.T	60.993	15	0.99329	1	0.579546	2.0752e-17
GGYFDEFGIIR	G6PD_HUMAN	P11413	R.GGYFDEFGIIR.D	10.097	4	0.99207	1	1.36365	1.9026e-12
GHGAGGASILT	AMY1_HUMAN	P04745	R.GHGAGGASILT.F	65.362	60	0.98915	1	0.81407	2.48286e-11
GHGAGGASILT	AMY2B_HUMAN	P19961	R.GHGAGGASILT.F	53.816	42	0.98915	1	0.81407	2.48286e-11
GHGAGGASILT	AMYP_HUMAN	P04746	R.GHGAGGASILT.F	45.597	37	0.98915	1	0.81407	2.48286e-11
GHGAGGASILTF	AMY1_HUMAN	P04745	R.GHGAGGASILTF.W	65.362	60	0.98088	1	1.28214	1.95313e-16
GHGAGGASILTF	AMY2B_HUMAN	P19961	R.GHGAGGASILTF.W	53.816	42	0.98088	1	1.28214	1.95313e-16
GHGAGGASILTF	AMYP_HUMAN	P04746	R.GHGAGGASILTF.W	45.597	37	0.98088	1	1.28214	1.95313e-16
GHGAGGASILTFWDA	AMY1_HUMAN	P04745	R.GHGAGGASILTFWDA.R	65.362	60	0.99296	1	0.536578	2.20135e-13
GHGAGGASILTFWDA	AMY2B_HUMAN	P19961	R.GHGAGGASILTFWDA.R	53.816	42	0.99296	1	0.536578	2.20135e-13
GHGAGGASILTFWDA	AMYP_HUMAN	P04746	R.GHGAGGASILTFWDA.R	45.597	37	0.99296	1	0.536578	2.20135e-13
GHGAGGASILTFWDAR	AMY1_HUMAN	P04745	R.GHGAGGASILTFWDAR.L	65.362	60	0.99196	1	0.972758	6.10352e-22
GHGAGGASILTFWDAR	AMY2B_HUMAN	P19961	R.GHGAGGASILTFWDAR.L	53.816	42	0.99196	1	0.972758	6.10352e-22
GHGAGGASILTFWDAR	AMYP_HUMAN	P04746	R.GHGAGGASILTFWDAR.L	45.597	37	0.99196	1	0.972758	6.10352e-22
GHHEAEIKPLAQSHATK	MYG_HUMAN	P02144	K.GHHEAEIKPLAQSHATK.H	24.026	6	0.99145	1	0.801477	8.57858e-22
GHLENNPALEK	RLA0L_HUMAN	Q8NHW5	R.GHLENNPALEK.L	17.35	5	0.99267	1	1.06987	1.95313e-15
GHLENNPALEK	RLA0_HUMAN	P05388	R.GHLENNPALEK.L	17.35	5	0.99267	1	1.06987	1.95313e-15
GHNGWVTQIATTPQFPDMILSASR	GBLP_HUMAN	P63244	K.GHNGWVTQIATTPQFPDMILSASR.D	18.927	4	0.99233	1	0.761948	2.16984e-15
GHVFEESQVAGTPMFVVK	EF2_HUMAN	P13639	R.GHVFEESQVAGTPMFVVK.A	33.566	23	0.99216	1	1.65938	2.49031e-15
GHYTEGAELVDSVLDVVR	TBB2A_HUMAN	Q13885	K.GHYTEGAELVDSVLDVVR.K	42.247	18	0.99387	1	1.37356	9.77548e-24
GHYTEGAELVDSVLDVVR	TBB3_HUMAN	Q13509	K.GHYTEGAELVDSVLDVVR.K	26.889	12	0.99387	1	1.37356	9.77548e-24
GHYTEGAELVDSVLDVVR	TBB5_HUMAN	P07437	K.GHYTEGAELVDSVLDVVR.K	40.09	16	0.99387	1	1.37356	9.77548e-24
GHYTEGAELVDSVLDVVRK	TBB2A_HUMAN	Q13885	K.GHYTEGAELVDSVLDVVRK.E	42.247	18	0.99265	1	0.986065	4.06151e-24
GHYTEGAELVDSVLDVVRK	TBB3_HUMAN	Q13509	K.GHYTEGAELVDSVLDVVRK.E	26.889	12	0.99265	1	0.986065	4.06151e-24
GHYTEGAELVDSVLDVVRK	TBB5_HUMAN	P07437	K.GHYTEGAELVDSVLDVVRK.E	40.09	16	0.99265	1	0.986065	4.06151e-24
GIFPPPPPQP	SMR3B_HUMAN	P02814	P.GIFPPPPPQP.-	67.089	19	0.99248	1	0.664524	3.90625e-14
GIGTDEFTLNR	ANXA3_HUMAN	P12429	K.GIGTDEFTLNR.I	31.579	8	0.99316	1	1.1814	2.05078e-15
GIGTNEQAIIDVLTK	ANXA8_HUMAN	P13928	K.GIGTNEQAIIDVLTK.R	11.621	4	0.99359	1	1.3131	1.46484e-19
GIGTNEQAIIDVLTK	AXA81_HUMAN	Q5T2P8	K.GIGTNEQAIIDVLTK.R	11.621	4	0.99359	1	1.3131	1.46484e-19
GIGTNEQAIIDVLTK	AXA82_HUMAN	Q5VT79	K.GIGTNEQAIIDVLTK.R	11.621	4	0.99359	1	1.3131	1.46484e-19
GIGTNEQAIIDVLTKR	ANXA8_HUMAN	P13928	K.GIGTNEQAIIDVLTKR.S	11.621	4	0.93314	1	1.17241	1.28032e-13
GIGTNEQAIIDVLTKR	AXA81_HUMAN	Q5T2P8	K.GIGTNEQAIIDVLTKR.S	11.621	4	0.93314	1	1.17241	1.28032e-13
GIGTNEQAIIDVLTKR	AXA82_HUMAN	Q5VT79	K.GIGTNEQAIIDVLTKR.S	11.621	4	0.93314	1	1.17241	1.28032e-13
GIHETTFNSIMK	ACTBL_HUMAN	Q562R1	S.GIHETTFNSIMK.C	28.457	15	0.99305	1	1.60619	1.46484e-15
GIHETTFNSIMK	ACTB_HUMAN	Q96HG5	C.GIHETTFNSIMK.C	80.8	48	0.99305	1	1.60619	1.46484e-15
GIHETTFNSIMK	ACTG_HUMAN	P63261	C.GIHETTFNSIMK.C	80.8	48	0.99305	1	1.60619	1.46484e-15
GIHETTFNSIMK	POTEE_HUMAN	Q6S8J3	C.GIHETTFNSIMK.S	12.186	18	0.99305	1	1.60619	1.46484e-15
GIHETTFNSIMK	POTEF_HUMAN	A5A3E0	C.GIHETTFNSIMK.S	10.512	17	0.99305	1	1.60619	1.46484e-15
GIHNSIGDYR	DESP_HUMAN	P15924	R.GIHNSIGDYR.W	49.739	138	0.99344	1	1.58118	3.90625e-14
GILAADESTGSIAK	ALDOA_HUMAN	P04075	K.GILAADESTGSIAK.R	34.341	13	0.99323	1	0.417363	2.92969e-18
GILAADESTGSIAKR	ALDOA_HUMAN	P04075	K.GILAADESTGSIAKR.L	34.341	13	0.99354	1	0.91471	6.96187e-16
GILFVGSGVSGGEEGAR	6PGD_HUMAN	P52209	K.GILFVGSGVSGGEEGAR.Y	41.615	17	0.99158	1	0.95518	4.21906e-22
GILGYTEHQVV	G3P_HUMAN	P04406	K.GILGYTEHQVV.S	65.97	33	0.98904	1	0.441369	2.31798e-12
GILLYGPPGTGK	TERA_HUMAN	P55072	R.GILLYGPPGTGK.T	12.655	8	0.99349	0.521687	1.00883	7.77344e-13
GISQEQMQEFR	ACTN4_HUMAN	O43707	K.GISQEQMQEFR.A	42.371	27	0.99201	1	0.65847	5.31885e-14
GIVDQSQQAYQEAFEISK	1433Z_HUMAN	Q6NUR9	K.GIVDQSQQAYQEAFEISK.K	53.878	14	0.99263	1	1.61423	3.66211e-23
GIVDQSQQAYQEAFEISKK	1433Z_HUMAN	Q6NUR9	K.GIVDQSQQAYQEAFEISKK.E	53.878	14	0.99287	1	0.77977	2.45788e-23
GIVDSITGQR	DESP_HUMAN	P15924	R.GIVDSITGQR.L	49.739	138	0.99319	1	2.14033	7.8125e-14
GIVMDSGDGVTHTVPIYEGYALPHAILR	ACTB_HUMAN	Q96HG5	T.GIVMDSGDGVTHTVPIYEGYALPHAILR.L	80.8	48	0.99363	1	0.98624	9.09764e-25
GIVMDSGDGVTHTVPIYEGYALPHAILR	ACTG_HUMAN	P63261	T.GIVMDSGDGVTHTVPIYEGYALPHAILR.L	80.8	48	0.99363	1	0.98624	9.09764e-25
GIYAYGFEKPSAIQQR	IF4A1_HUMAN	P60842	R.GIYAYGFEKPSAIQQR.A	21.429	7	0.99299	1	1.25533	3.72229e-19
GIYAYGFEKPSAIQQR	IF4A2_HUMAN	Q14240	R.GIYAYGFEKPSAIQQR.A	13.022	4	0.99299	1	1.25533	3.72229e-19
GIYGQYQLLGIK	ZG16B_HUMAN	Q96DA0	V.GIYGQYQLLGIK.S	57.212	15	0.99238	1	1.48733	2.12378e-14
GKLEEQRPER	TCTP_HUMAN	P13693	K.GKLEEQRPER.V	13.953	2	0.98789	1	1.02591	8.08597e-12
GKMYGPGGGK	ZG16B_HUMAN	Q96DA0	A.GKMYGPGGGK.Y	57.212	15	0.99159	1	1.13345	4.49707e-12
GLDLPALNMQR	PERM_HUMAN	P05164	I.GLDLPALNMQR.S	29.396	23	0.99317	1	0.764933	2.38281e-13
GLDYASQQGTAALQK	BPI_HUMAN	Q9H203	K.GLDYASQQGTAALQK.E	10.062	4	0.99102	1	0.499557	9.83155e-18
GLEWLWSPQIVGLYNR	PKP3_HUMAN	Q9Y446	K.GLEWLWSPQIVGLYNR.L	6.148	3	0.99335	1	1.14341	7.36943e-18
GLEWVANIK	HV320_HUMAN	P01781	K.GLEWVANIK.Z	17.241	2	0.99293	1	1.09998	7.8125e-13
GLFIIDDKGILR	PRDX1_HUMAN	Q06830	R.GLFIIDDKGILR.Q	48.744	12	0.99258	1	0.808365	1.5625e-15
GLFIIDGK	PRDX2_HUMAN	P32119	R.GLFIIDGK.G	25.253	5	0.78266	1	1.05468	5.85938e-11
GLGSNERLEFIVSTGPYPSESAMTK	TGM3_HUMAN	Q08188	K.GLGSNERLEFIVSTGPYPSESAMTK.A	58.297	45	0.99339	1	0.499644	1.16822e-20
GLGTDEDTLIEILASR	ANXA1_HUMAN	P04083	K.GLGTDEDTLIEILASR.T	67.052	42	0.99311	1	0.0495923	7.32422e-21
GLGTDEESILTLLTSR	ANXA5_HUMAN	P08758	K.GLGTDEESILTLLTSR.S	17.188	4	0.99325	1	1.15154	4.46668e-16
GLGVGFGSGGGSSSSV	K2C5_HUMAN	P13647	R.GLGVGFGSGGGSSSSV.K	65.932	71	0.99193	1	1.33777	1.43433e-20
GLGVGFGSGGGSSSSVK	K2C5_HUMAN	P13647	R.GLGVGFGSGGGSSSSVK.F	65.932	71	0.99245	1	0.407936	1.52588e-23
GLIDEVNQDFTNR	FIBA_HUMAN	P02671	K.GLIDEVNQDFTNR.I	2.425	2	0.99307	1	0.463965	1.45233e-17
GLIDYETFK	DESP_HUMAN	P15924	K.GLIDYETFK.E	49.739	138	0.99317	1	1.00936	3.41016e-12
GLIENTSTQR	EVPL_HUMAN	Q92817	R.GLIENTSTQR.L	19.97	31	0.97293	1	1.17746	2.11914e-13
GLKEGIPALDNFLDKL	EF2_HUMAN	P13639	K.GLKEGIPALDNFLDKL.-	33.566	23	0.98951	1	1.92616	9.95779e-11
GLMESISAGSFSVPGGHK	GBP6_HUMAN	Q6ZN66	K.GLMESISAGSFSVPGGHK.L	35.387	19	0.99395	1	1.37722	8.66291e-20
GLMSSGMSQLIGLK	PKP1_HUMAN	Q13835	K.GLMSSGMSQLIGLK.E	30.254	18	0.99075	1	1.04706	5.9082e-18
GLPAPIEK	IGHG2_HUMAN	P01859	K.GLPAPIEK.T	30.982	12	0.9922	0.830111	1.18886	1.5625e-11
GLPSPYNMSSAPGSR	DESP_HUMAN	P15924	K.GLPSPYNMSSAPGSR.S	49.739	138	0.9928	1	0.877471	3.86536e-18
GLSQQLFDSALLLLQK	BPIL1_HUMAN	Q8N4F0	V.GLSQQLFDSALLLLQK.A	41.266	14	0.99354	1	1.41923	1.9877e-16
GLSTESILIPR	LC1L1_HUMAN	Q5VSP4	R.GLSTESILIPR.Q	29.012	5	0.99385	1	0.859391	7.8125e-15
GLSTESILIPR	LCN1_HUMAN	P31025	R.GLSTESILIPR.Q	76.136	13	0.99385	1	0.859391	7.8125e-15
GLVGEIIKR	NDKA_HUMAN	P15531	R.GLVGEIIKR.F	25	3	0.99085	1	1.02723	3.79297e-12
GLVGEIIKR	NDKB_HUMAN	P22392	R.GLVGEIIKR.F	41.447	5	0.99085	1	1.02723	3.79297e-12
GLVGIEFK	DESP_HUMAN	P15924	R.GLVGIEFK.E	49.739	138	0.99172	1	1.12664	1.5625e-11
GLVLSGVLHK	SPB3_HUMAN	Q8IXI3	R.GLVLSGVLHK.A	42.821	15	0.99291	1	1.29019	7.8125e-14
GMLKDNAMLEYLK	EZRI_HUMAN	P15311	R.GMLKDNAMLEYLK.I	26.28	13	0.99331	1	1.50771	3.07617e-17
GMLREDAVLEYLK	MOES_HUMAN	P26038	R.GMLREDAVLEYLK.I	15.598	8	0.99323	1	1.38898	6.03234e-14
GMQDLVEDFK	K2C6A_HUMAN	P02538	R.GMQDLVEDFK.N	70.035	77	0.99397	1	0.983276	4.00391e-14
GMQDLVEDFKNK	K2C6A_HUMAN	P02538	R.GMQDLVEDFKNK.Y	70.035	77	0.99355	1	0.729468	1.95313e-16
GMQDLVEDFKNKYEDEINKR	K2C6A_HUMAN	P02538	R.GMQDLVEDFKNKYEDEINKR.T	70.035	77	0.99385	1	1.04397	4.18318e-21
GNDVAFHFNPR	LEG3_HUMAN	P17931	R.GNDVAFHFNPR.F	19.6	4	0.99315	1	1.54345	3.90625e-14
GNFHAVYRDDLK	S10A8_HUMAN	P05109	K.GNFHAVYRDDLK.K	88.172	8	0.99316	1	1.17835	5.34545e-14
GNFHAVYRDDLKK	S10A8_HUMAN	P05109	K.GNFHAVYRDDLKK.L	88.172	8	0.9931	1	1.1262	4.2493e-15
GNFNYIEFTR	ML12A_HUMAN	P19105	K.GNFNYIEFTR.I	18.713	3	0.99288	1	1.08583	3.90625e-14
GNPTVEVDLFTSK	ENOA_HUMAN	Q6GMP2	R.GNPTVEVDLFTSK.G	64.977	24	0.9936	1	0.350357	2.44141e-18
GNTAAQLSK	ILEU_HUMAN	P30740	R.GNTAAQLSK.T	59.367	17	0.99324	1	0.853381	8.98438e-13
GNVGFVFTK	RLA0L_HUMAN	Q8NHW5	W.GNVGFVFTK.E	17.35	5	0.97698	1	0.942417	5.85938e-12
GNVGFVFTK	RLA0_HUMAN	P05388	R.GNVGFVFTK.E	17.35	5	0.97698	1	0.942417	5.85938e-12
GPDFFTR	CAP7_HUMAN	P20160	R.GPDFFTR.V	15.139	5	0.98463	1	1.23748	7.8125e-11
GPDFFTRV	CAP7_HUMAN	P20160	R.GPDFFTRV.A	15.139	5	0.9914	1	1.13263	3.90625e-12
GPGFVPPPPPPPYGPGR	SMR3B_HUMAN	P02814	F.GPGFVPPPPPPPYGPGR.I	67.089	19	0.98992	1	-0.166897	1.21433e-14
GPGGDPPYK	MUC5B_HUMAN	Q7M4S5	R.GPGGDPPYK.I	6.265	25	0.99295	1	0.797253	1.95313e-13
GPGIFPPPPPQP	SMR3B_HUMAN	P02814	Y.GPGIFPPPPPQP.-	67.089	19	0.99384	1	0.432382	3.30829e-13
GPGRIPPPPPAPYGPGIFPPPPPQP	SMR3B_HUMAN	P02814	Y.GPGRIPPPPPAPYGPGIFPPPPPQP.-	67.089	19	0.99317	1	1.5232	1.18186e-18
GPGVPFQR	LEG7_HUMAN	P47929	R.GPGVPFQR.G	56.618	11	0.99301	1	0.875819	7.8125e-12
GPLAPPQPFGPGFVPPPPPPPYGPGR	SMR3B_HUMAN	P02814	P.GPLAPPQPFGPGFVPPPPPPPYGPGR.I	67.089	19	0.9928	1	0.79657	3.76256e-21
GPLMMYISK	EF2_HUMAN	P13639	K.GPLMMYISK.M	33.566	23	0.99393	1	0.882213	7.8125e-13
GPNLHGLFGR	CYC_HUMAN	P99999	T.GPNLHGLFGR.K	13.333	5	0.99321	0.660465	0.872706	3.90625e-13
GPPPPAGGNPQQPQAPPAGQPQGPPRPPQGGRPSRPPQ	PRB2_HUMAN	P02812	Q.GPPPPAGGNPQQPQAPPAGQPQGPPRPPQGGRPSRPPQ.-	44.952	12	0.9929	1	0.42199	5.87024e-22
GPPPPAGGNPQQPQAPPAGQPQGPPRPPQGGRPSRPPQ	PRP1_HUMAN	P04280	Q.GPPPPAGGNPQQPQAPPAGQPQGPPRPPQGGRPSRPPQ.-	53.571	12	0.9929	1	0.42199	5.87024e-22
GPPPPGGNPQQPLPPPAGKPQGPPPPPQGGRPHRPPQGQPPQ	PRB3_HUMAN	Q04118	Q.GPPPPGGNPQQPLPPPAGKPQGPPPPPQGGRPHRPPQGQPPQ.-	17.476	9	0.99286	1	0.564224	8.24626e-22
GPPPPGKPQGPPAQGGSK	PRP1_HUMAN	P04280	Q.GPPPPGKPQGPPAQGGSK.S	53.571	12	0.99224	1	0.26929	1.19635e-19
GPPPPGKPQGPPPQGDK	PRB2_HUMAN	P02812	Q.GPPPPGKPQGPPPQGDK.S	44.952	12	0.99373	1	0.119102	3.71391e-17
GPPPPGKPQGPPPQGDK	PRP1_HUMAN	P04280	Q.GPPPPGKPQGPPPQGDK.S	53.571	12	0.99373	1	0.119102	3.71391e-17
GPPPPGKPQGPPPQGDKSR	PRB2_HUMAN	P02812	Q.GPPPPGKPQGPPPQGDKSR.S	44.952	12	0.99364	1	0.170894	4.31033e-19
GPPPPGKPQGPPPQGDKSR	PRP1_HUMAN	P04280	Q.GPPPPGKPQGPPPQGDKSR.S	53.571	12	0.99364	1	0.170894	4.31033e-19
GPPPPGKPQGPPPQGDNK	PRB2_HUMAN	P02812	Q.GPPPPGKPQGPPPQGDNK.S	44.952	12	0.99293	1	0.151936	1.8217e-19
GPPPPGKPQGPPPQGGSK	PRB2_HUMAN	P02812	Q.GPPPPGKPQGPPPQGGSK.S	44.952	12	0.99153	1	-0.150815	2.56758e-21
GPPPPPPGKPQGPPPQGGRPQGPPQGQSPQ	PRPC_HUMAN	P02810	Q.GPPPPPPGKPQGPPPQGGRPQGPPQGQSPQ.-	51.807	18	0.99255	1	0.995686	1.13649e-23
GPPPPPQGGRPHRPPQGQPPQ	PRB3_HUMAN	Q04118	Q.GPPPPPQGGRPHRPPQGQPPQ.-	17.476	9	0.99361	1	0.401401	2.16823e-12
GPPPPPQGGRPPRPAQGQQPPQ	PRB4_HUMAN	P10163	Q.GPPPPPQGGRPPRPAQGQQPPQ.-	19.032	3	0.99344	1	0.530008	4.92332e-13
GPPPQGDKSQSPR	PRP1_HUMAN	P04280	Q.GPPPQGDKSQSPR.S	53.571	12	0.99352	1	1.93077	1.02661e-16
GPPPQGDNKSQSAR	PRB2_HUMAN	P02812	Q.GPPPQGDNKSQSAR.S	44.952	12	0.99054	1	1.59053	1.37332e-16
GPPPQGGNKPQGPPPPGKPQGPPAQGGSK	PRP1_HUMAN	P04280	Q.GPPPQGGNKPQGPPPPGKPQGPPAQGGSK.S	53.571	12	0.99092	1	0.0381863	1.68197e-22
GPPPQGGNKPQGPPPPGKPQGPPPQGDK	PRB2_HUMAN	P02812	Q.GPPPQGGNKPQGPPPPGKPQGPPPQGDK.S	44.952	12	0.9931	1	0.316874	4.68224e-20
GPPPQGGNKPQGPPPPGKPQGPPPQGDK	PRP1_HUMAN	P04280	Q.GPPPQGGNKPQGPPPPGKPQGPPPQGDK.S	53.571	12	0.9931	1	0.316874	4.68224e-20
GPPPQGGNKPQGPPPPGKPQGPPPQGDNK	PRB2_HUMAN	P02812	Q.GPPPQGGNKPQGPPPPGKPQGPPPQGDNK.S	44.952	12	0.99109	1	-0.236299	2.02792e-20
GPPPQGGRPQGPPQGQSPQ	PRPC_HUMAN	P02810	Q.GPPPQGGRPQGPPQGQSPQ.-	51.807	18	0.99339	1	0.149846	1.02338e-23
GPPQQGGHPRPPR	PRPC_HUMAN	P02810	Q.GPPQQGGHPRPPR.G	51.807	18	0.99031	1	0.286218	4.88281e-17
GPPRPPQGGRPSRPPQ	PRB2_HUMAN	P02812	Q.GPPRPPQGGRPSRPPQ.-	44.952	12	0.99291	1	0.807133	3.08734e-14
GPPRPPQGGRPSRPPQ	PRP1_HUMAN	P04280	Q.GPPRPPQGGRPSRPPQ.-	53.571	12	0.99291	1	0.807133	3.08734e-14
GPSVFPLAPSSK	IGHG1_HUMAN	P01857	K.GPSVFPLAPSSK.S	34.848	16	0.99391	1	0.567795	4.88281e-17
GPSWDPFR	HSPB1_HUMAN	Q9UC36	R.GPSWDPFR.D	94.146	23	0.99239	1	1.27649	3.90625e-12
GPSWDPFRDWYPHSR	HSPB1_HUMAN	Q9UC36	R.GPSWDPFRDWYPHSR.L	94.146	23	0.99305	1	1.3032	6.81896e-17
GPYPPGPL	SMR3B_HUMAN	P02814	R.GPYPPGPL.A	67.089	19	0.97995	1	1.00915	7.8125e-12
GPYPPGPLAPPQPF	SMR3B_HUMAN	P02814	R.GPYPPGPLAPPQPF.G	67.089	19	0.99274	1	0.538315	9.76563e-19
GPYPPGPLAPPQPFGPGFVPPPPPPPY	SMR3B_HUMAN	P02814	R.GPYPPGPLAPPQPFGPGFVPPPPPPPY.G	67.089	19	0.9922	1	0.503659	7.10713e-20
GPYPPGPLAPPQPFGPGFVPPPPPPPYGPGR	SMR3B_HUMAN	P02814	R.GPYPPGPLAPPQPFGPGFVPPPPPPPYGPGR.I	67.089	19	0.99113	1	-0.116139	4.66739e-22
GQAAVQQLQAEGLSPR	CBR1_HUMAN	P16152	R.GQAAVQQLQAEGLSPR.F	22.022	5	0.99319	1	0.961701	5.62267e-19
GQAAVQQLQAEGLSPR	CBR3_HUMAN	O75828	R.GQAAVQQLQAEGLSPR.F	8.664	2	0.99319	1	0.961701	5.62267e-19
GQLEANLLQVLEKVEEFR	K2C80_HUMAN	Q6KB66	R.GQLEANLLQVLEKVEEFR.I	17.478	6	0.9821	1	1.35932	8.96714e-21
GQNFQVLMIMNK	TGM3_HUMAN	Q08188	R.GQNFQVLMIMNK.G	58.297	45	0.99319	1	1.08552	1.03639e-15
GQNRPGVQTQGQATGSAWVSSYDR	CRNN_HUMAN	Q9UBG3	R.GQNRPGVQTQGQATGSAWVSSYDR.Q	54.141	18	0.99291	1	0.517927	8.41196e-26
GQPFEVLIIASDDGFK	LEG7_HUMAN	P47929	R.GQPFEVLIIASDDGFK.A	56.618	11	0.99373	1	1.62259	5.11566e-20
GQPFEVLIIASDDGFKAV	LEG7_HUMAN	P47929	R.GQPFEVLIIASDDGFKAV.V	56.618	11	0.99139	1	0.469872	6.08163e-18
GQPFEVLIIASDDGFKAVVGDAQYHHFR	LEG7_HUMAN	P47929	R.GQPFEVLIIASDDGFKAVVGDAQYHHFR.H	56.618	11	0.99262	1	1.83444	1.79976e-19
GQPFHMLLLLSR	TGM1_HUMAN	P22735	R.GQPFHMLLLLSR.T	26.683	16	0.99237	1	1.35981	1.75085e-13
GQPREPQVYTLPPSREEMTK	IGHG2_HUMAN	P01859	K.GQPREPQVYTLPPSREEMTK.N	30.982	12	0.99358	1	0.482331	1.84738e-17
GQPREPQVYTLPPSREEMTK	IGHG3_HUMAN	P01860	K.GQPREPQVYTLPPSREEMTK.N	22.546	13	0.99358	1	0.482331	1.84738e-17
GQTEGKIPELLASGMVDNMTK	ILEU_HUMAN	P30740	K.GQTEGKIPELLASGMVDNMTK.L	59.367	17	0.99296	1	1.17695	2.82414e-18
GQTGGDVNVEMDAAPGVDLSR	K1C16_HUMAN	P08779	R.GQTGGDVNVEMDAAPGVDLSR.I	72.304	50	0.99238	1	0.209539	1.47758e-23
GQVGGDVNVEMDAAPGVDLSR	K1C14_HUMAN	P02533	R.GQVGGDVNVEMDAAPGVDLSR.I	60.593	45	0.98402	1	-0.338564	9.5843e-24
GRIPPPPPAPYGPGIFPPPPPQP	SMR3B_HUMAN	P02814	P.GRIPPPPPAPYGPGIFPPPPPQP.-	67.089	19	0.99326	1	0.620171	5.30093e-16
GRLDSELR	K2C5_HUMAN	P13647	R.GRLDSELR.N	65.932	71	0.99276	0.99441	1.674	8.40362e-11
GRLDSELR	K2C6A_HUMAN	P02538	R.GRLDSELR.G	70.035	77	0.99276	0.99441	1.674	8.40362e-11
GRLDSELR	K2C6B_HUMAN	P04259	R.GRLDSELR.N	68.44	73	0.99276	0.99441	1.674	8.40362e-11
GRLDSELR	K2C6C_HUMAN	P48668	R.GRLDSELR.N	67.553	75	0.99276	0.99441	1.674	8.40362e-11
GRLDSELR	K2C79_HUMAN	Q5XKE5	R.GRLDSELR.N	13.084	12	0.99276	0.99441	1.674	8.40362e-11
GRPHRPPQGQPPQ	PRB3_HUMAN	Q04118	G.GRPHRPPQGQPPQ.-	17.476	9	0.99166	1	1.04828	8.15702e-15
GRPQGPPQGQSPQ	PRPC_HUMAN	P02810	G.GRPQGPPQGQSPQ.-	51.807	18	0.98749	1	0.0916968	1.26953e-16
GRPQGPPQQGGHQ	PRPC_HUMAN	P02810	R.GRPQGPPQQGGHQ.Q	51.807	18	0.99314	1	2.01177	1.11887e-15
GRPQGPPQQGGHQQ	PRPC_HUMAN	P02810	R.GRPQGPPQQGGHQQ.G	51.807	18	0.99206	1	0.939208	7.91016e-18
GRPQGPPQQGGHQQG	PRPC_HUMAN	P02810	R.GRPQGPPQQGGHQQG.P	51.807	18	0.99112	1	1.18313	2.38503e-15
GRPQGPPQQGGHQQGPPPPPPGKPQ	PRPC_HUMAN	P02810	R.GRPQGPPQQGGHQQGPPPPPPGKPQ.G	51.807	18	0.99322	1	0.769599	1.13869e-18
GRPQGPPQQGGHQQGPPPPPPGKPQGPPPQG	PRPC_HUMAN	P02810	R.GRPQGPPQQGGHQQGPPPPPPGKPQGPPPQG.G	51.807	18	0.99288	1	0.125396	1.30935e-22
GRPQGPPQQGGHQQGPPPPPPGKPQGPPPQGGRPQ	PRPC_HUMAN	P02810	R.GRPQGPPQQGGHQQGPPPPPPGKPQGPPPQGGRPQ.G	51.807	18	0.99314	1	0.498888	3.37567e-27
GRPQGPPQQGGHQQGPPPPPPGKPQGPPPQGGRPQGPPQGQSPQ	PRPC_HUMAN	P02810	R.GRPQGPPQQGGHQQGPPPPPPGKPQGPPPQGGRPQGPPQGQSPQ.-	51.807	18	0.99262	1	0.388377	2.36561e-26
GRVEVLYR	DMBT1_HUMAN	Q9Y4V9	R.GRVEVLYR.G	14.463	9	0.99289	1	0.800859	1.5625e-11
GSAIVGGGKR	K2C4_HUMAN	P19013	C.GSAIVGGGKR.G	74.532	75	0.99177	1	1.68148	3.90625e-13
GSCQLGGGR	K1C13_HUMAN	P13646	G.GSCQLGGGR.G	69.869	59	0.98599	1	2.24975	1.5625e-11
GSDSVWNFHVWNEGWFVR	TGM3_HUMAN	Q08188	K.GSDSVWNFHVWNEGWFVR.S	58.297	45	0.99333	1	0.968567	2.48337e-23
GSFPWQAK	HPTR_HUMAN	P00739	K.GSFPWQAK.M	8.621	4	0.99382	1	0.976774	7.8125e-12
GSFPWQAK	HPT_HUMAN	P00738	K.GSFPWQAK.M	18.966	10	0.99382	1	0.976774	7.8125e-12
GSFSEQGINEFLR	PDIA6_HUMAN	Q15084	K.GSFSEQGINEFLR.E	11.818	3	0.9926	1	0.785723	2.52173e-15
GSFTSSSNFMSIR	DMBT1_HUMAN	Q9Y4V9	R.GSFTSSSNFMSIR.F	14.463	9	0.99304	1	0.563098	2.41699e-17
GSGGGSSGGSIGGR	K2C1_HUMAN	P04264	R.GSGGGSSGGSIGGR.G	66.77	58	0.98153	1	2.0678	5.00488e-18
GSGTAEVELKK	KPYM_HUMAN	Q9BWB5	K.GSGTAEVELKK.G	49.153	22	0.99296	1	0.559056	1.95313e-15
GSGVNAAGDGTIR	TGM1_HUMAN	P22735	R.GSGVNAAGDGTIR.E	26.683	16	0.99294	1	0.793644	5.12696e-17
GSGWLYHSDAIR	PKP1_HUMAN	Q13835	K.GSGWLYHSDAIR.T	30.254	18	0.99304	1	1.32348	2.14844e-16
GSHFFPGNNVIYEK	POF1B_HUMAN	Q8WVV4	R.GSHFFPGNNVIYEK.T	13.752	6	0.99303	1	1.38807	3.89127e-15
GSLGGGFSSGGFSGGSFSR	K1C10_HUMAN	P13645	K.GSLGGGFSSGGFSGGSFSR.G	52.74	27	0.99243	1	-0.0717732	4.19617e-25
GSMYDGLADNYNYGTTSR	PKP1_HUMAN	Q13835	R.GSMYDGLADNYNYGTTSR.S	30.254	18	0.9927	1	0.425894	1.68228e-24
GSRPQGPFLIADKWPALPR	MMP9_HUMAN	P14780	R.GSRPQGPFLIADKWPALPR.K	7.638	4	0.99209	1	1.34332	3.40655e-14
GSSGGGCFGGSSGGYGGLGGFGGGSFRG	K1C10_HUMAN	P13645	R.GSSGGGCFGGSSGGYGGLGGFGGGSFRG.S	52.74	27	0.99322	1	0.270669	1.00381e-15
GTDLWLGVDALGLNIYEKDDKLTPK	EZRI_HUMAN	P15311	K.GTDLWLGVDALGLNIYEKDDKLTPK.I	26.28	13	0.94732	1	1.06394	9.94015e-14
GTDVNVFNTILTT	ANXA1_HUMAN	P04083	K.GTDVNVFNTILTT.R	67.052	42	0.99212	1	1.00415	1.08001e-12
GTDVNVFNTILTTR	ANXA1_HUMAN	P04083	K.GTDVNVFNTILTTR.S	67.052	42	0.99262	1	1.50831	2.34863e-17
GTGASGSFK	H11_HUMAN	Q02539	K.GTGASGSFK.L	15.349	3	0.99138	1	2.18587	1.95313e-13
GTGASGSFK	H12_HUMAN	P16403	K.GTGASGSFK.L	26.291	6	0.99138	1	2.18587	1.95313e-13
GTGASGSFK	H13_HUMAN	P16402	K.GTGASGSFK.L	25.339	6	0.99138	1	2.18587	1.95313e-13
GTGASGSFK	H14_HUMAN	P10412	K.GTGASGSFK.L	25.571	6	0.99138	1	2.18587	1.95313e-13
GTGASGSFK	H15_HUMAN	P16401	K.GTGASGSFK.L	24.336	6	0.99138	1	2.18587	1.95313e-13
GTGASGSFK	H1T_HUMAN	P22492	R.GTGASGSFK.L	11.594	2	0.99138	1	2.18587	1.95313e-13
GTIEILSDVQLIK	RLA0L_HUMAN	Q8NHW5	R.GTIEILSDVQLIK.T	17.35	5	0.99387	1	0.945005	9.68985e-14
GTIEILSDVQLIK	RLA0_HUMAN	P05388	R.GTIEILSDVQLIK.T	17.35	5	0.99387	1	0.945005	9.68985e-14
GTLSGWILSK	CALX_HUMAN	P27824	R.GTLSGWILSK.A	15.709	5	0.99256	1	1.35934	1.09375e-13
GTNPSAWVGSVEILLSYLR	TGM1_HUMAN	P22735	R.GTNPSAWVGSVEILLSYLR.T	26.683	16	0.99298	1	1.45418	2.50702e-23
GTNYLADVFEK	S10A7_HUMAN	P31151	K.GTNYLADVFEK.K	49.505	9	0.99297	1	0.956827	9.76563e-16
GTNYLADVFEKK	S10A7_HUMAN	P31151	K.GTNYLADVFEKK.D	49.505	9	0.99269	0.985158	0.962562	9.76563e-17
GVALHRPDVYLLPPAR	IGHM_HUMAN	P01871	K.GVALHRPDVYLLPPAR.E	19.027	7	0.99288	1	1.41635	1.59297e-16
GVALHRPDVYLLPPAR	MUCB_HUMAN	P04220	K.GVALHRPDVYLLPPAR.E	15.857	5	0.99288	1	1.41635	1.59297e-16
GVDEATIIDILTK	ANXA1_HUMAN	P04083	K.GVDEATIIDILTK.R	67.052	42	0.99307	1	1.55369	4.10156e-16
GVDEATIIDILTKR	ANXA1_HUMAN	P04083	K.GVDEATIIDILTKR.N	67.052	42	0.99217	1	1.50999	4.20532e-17
GVDEVTIVNILTNR	ANXA2_HUMAN	P07355	K.GVDEVTIVNILTNR.S	53.097	24	0.99363	1	0.657655	1.12305e-17
GVDIVMDPLGGSDTAK	VAT1_HUMAN	Q99536	K.GVDIVMDPLGGSDTAK.G	8.906	2	0.99265	1	0.394786	1.83608e-12
GVFGGVSGSGSGGYK	K22O_HUMAN	Q01546	R.GVFGGVSGSGSGGYK.G	46.082	34	0.99261	1	0.274984	6.40869e-20
GVLLEIEDLQVNQFK	IQGA1_HUMAN	P46940	K.GVLLEIEDLQVNQFK.N	8.69	9	0.99271	1	0.66149	1.08194e-13
GVQYLNEIKDSVVAGFQWATK	EF2_HUMAN	P13639	K.GVQYLNEIKDSVVAGFQWATK.E	33.566	23	0.99318	1	1.68633	1.15933e-22
GVVPLAGTNGETTTQGLDGLSER	ALDOA_HUMAN	P04075	K.GVVPLAGTNGETTTQGLDGLSER.C	34.341	13	0.99324	1	0.184137	1.55255e-27
GVYSSDVFDIFPGTYQTLEMFPR	CERU_HUMAN	P00450	R.GVYSSDVFDIFPGTYQTLEMFPR.T	9.108	5	0.99285	1	1.14446	2.75306e-19
GYDVIAQAQSGTGK	IF4A1_HUMAN	P60842	K.GYDVIAQAQSGTGK.T	21.429	7	0.99303	1	2.15881	3.6583e-17
GYDVIAQAQSGTGK	IF4A2_HUMAN	Q14240	K.GYDVIAQAQSGTGK.T	13.022	4	0.99303	1	2.15881	3.6583e-17
GYEEWLLNEIR	ACTN1_HUMAN	P12814	K.GYEEWLLNEIR.R	13.901	10	0.99212	1	0.692547	3.14224e-14
GYEEWLLNEIR	ACTN2_HUMAN	P35609	K.GYEEWLLNEIR.R	5.369	4	0.99212	1	0.692547	3.14224e-14
GYEEWLLNEIR	ACTN4_HUMAN	O43707	K.GYEEWLLNEIR.R	42.371	27	0.99212	1	0.692547	3.14224e-14
GYFNEELSEILSDPSDDTK	DESP_HUMAN	P15924	R.GYFNEELSEILSDPSDDTK.G	49.739	138	0.99395	1	1.06434	2.39111e-20
GYFNEELSEILSDPSDDTKGFFDPNTEENLTYLQLK	DESP_HUMAN	P15924	R.GYFNEELSEILSDPSDDTKGFFDPNTEENLTYLQLK.E	49.739	138	0.99254	1	1.12303	1.71002e-24
GYISPYFINTSK	CH60_HUMAN	P10809	R.GYISPYFINTSK.G	9.599	4	0.99268	1	0.911214	1.24961e-13
GYSFTTTAER	ACTB_HUMAN	Q96HG5	R.GYSFTTTAER.E	80.8	48	0.99369	1	0.796628	9.76563e-15
GYSFTTTAER	ACTG_HUMAN	P63261	R.GYSFTTTAER.E	80.8	48	0.99369	1	0.796628	9.76563e-15
GYSFTTTAEREIVR	ACTB_HUMAN	Q96HG5	R.GYSFTTTAEREIVR.D	80.8	48	0.99287	1	1.37836	3.82664e-14
GYSFTTTAEREIVR	ACTG_HUMAN	P63261	R.GYSFTTTAEREIVR.D	80.8	48	0.99287	1	1.37836	3.82664e-14
HAETSSGGQAASSHEQAR	FILA_HUMAN	P20930	P.HAETSSGGQAASSHEQAR.S	10.416	13	0.99233	1	2.07001	1.66321e-23
HALIIYDDLSK	ATPA_HUMAN	P25705	K.HALIIYDDLSK.Q	20.253	7	0.9933	1	0.766931	3.38086e-14
HEERQDEHGYISR	HSPB1_HUMAN	Q9UC36	K.HEERQDEHGYISR.C	94.146	23	0.99272	1	0.411363	4.88281e-18
HEISEMNR	K2C5_HUMAN	P13647	K.HEISEMNR.M	65.932	71	0.99373	1	0.509337	7.8125e-12
HFSPEELK	CRYAB_HUMAN	P02511	K.HFSPEELK.V	42.857	5	0.99239	1	1.14461	7.8125e-12
HFSVEGQLEFR	H90B3_HUMAN	Q58FF7	K.HFSVEGQLEFR.A	12.563	6	0.99326	1	0.506657	1.95313e-15
HFSVEGQLEFR	HS902_HUMAN	Q14568	K.HFSVEGQLEFR.A	20.408	6	0.99326	1	0.506657	1.95313e-15
HFSVEGQLEFR	HS904_HUMAN	Q58FG1	K.HFSVEGQLEFR.A	5.742	2	0.99326	1	0.506657	1.95313e-15
HFSVEGQLEFR	HS90A_HUMAN	P07900	K.HFSVEGQLEFR.A	19.945	13	0.99326	1	0.506657	1.95313e-15
HFSVEGQLEFR	HS90B_HUMAN	P08238	K.HFSVEGQLEFR.A	24.171	15	0.99326	1	0.506657	1.95313e-15
HFVALSTNTTK	G6PI_HUMAN	P06744	K.HFVALSTNTTK.V	38.351	14	0.99349	1	1.22425	9.76563e-16
HGESAWNLENR	PGAM1_HUMAN	P18669	R.HGESAWNLENR.F	42.913	9	0.99274	1	0.319916	9.76563e-16
HGGGGGGFGGGGFGSR	K22E_HUMAN	P35908	R.HGGGGGGFGGGGFGSR.S	40.845	30	0.99319	1	0.62126	1.52588e-22
HGIVEDWDLMER	ARP3_HUMAN	P61158	R.HGIVEDWDLMER.F	10.766	4	0.99389	1	0.961041	2.51709e-16
HGSLGFLPR	RL3_HUMAN	P39023	R.HGSLGFLPR.K	9.677	3	0.99223	1	0.69107	7.8125e-13
HGTDDGVVWMNWK	FIBB_HUMAN	P02675	K.HGTDDGVVWMNWK.G	26.477	10	0.99329	1	1.27377	1.2207e-18
HGVYNPNK	MDHM_HUMAN	P40926	K.HGVYNPNK.I	27.219	7	0.99198	1	2.24765	3.90625e-12
HGYIGEFEIIDDHR	RS15A_HUMAN	P62244	K.HGYIGEFEIIDDHR.A	17.692	2	0.99253	1	0.978588	1.11951e-17
HHEASSHADISR	FILA_HUMAN	P20930	R.HHEASSHADISR.H	10.416	13	0.95447	1	1.87699	1.2207e-16
HHEASTHADISR	FILA_HUMAN	P20930	R.HHEASTHADISR.H	10.416	13	0.99296	1	1.90523	9.76563e-17
HHLLASDEEIQDVSGTWYLK	LC1L1_HUMAN	Q5VSP4	A.HHLLASDEEIQDVSGTWYLK.A	29.012	5	0.99393	1	1.31774	1.2207e-24
HHLLASDEEIQDVSGTWYLK	LCN1_HUMAN	P31025	A.HHLLASDEEIQDVSGTWYLK.A	76.136	13	0.99393	1	1.31774	1.2207e-24
HIADLAGNSEVILPVPAFNV	ENOA_HUMAN	Q6GMP2	R.HIADLAGNSEVILPVPAFNV.I	64.977	24	0.99265	1	0.0876582	3.31185e-12
HIADLAGNSEVILPVPAFNVINGGSHAGNK	ENOA_HUMAN	Q6GMP2	R.HIADLAGNSEVILPVPAFNVINGGSHAGNK.L	64.977	24	0.99273	1	0.598194	1.62035e-21
HIAEEADR	TPM3_HUMAN	P06753	K.HIAEEADR.K	10.211	4	0.99214	1	1.75572	7.8125e-12
HIAEEADR	TPM4_HUMAN	Q9UCS3	K.HIAEEADR.K	16.129	5	0.99214	1	1.75572	7.8125e-12
HIAEEADRKYEEVAR	TPM3_HUMAN	P06753	K.HIAEEADRKYEEVAR.K	10.211	4	0.993	1	1.36394	1.49241e-18
HIAEEADRKYEEVAR	TPM4_HUMAN	Q9UCS3	K.HIAEEADRKYEEVAR.K	16.129	5	0.993	1	1.36394	1.49241e-18
HIFSEDTSDFSGMSETK	SPB5_HUMAN	P36952	K.HIFSEDTSDFSGMSETK.G	29.067	8	0.99201	1	1.03072	1.52588e-23
HIVLSGGSTMYPGLPSR	ARP2_HUMAN	P61160	K.HIVLSGGSTMYPGLPSR.L	15.99	5	0.99002	1	1.24783	3.83046e-14
HIYYITGETK	HS90A_HUMAN	P07900	K.HIYYITGETK.D	19.945	13	0.99345	1	0.513641	3.90625e-14
HKELAPYDENWFYTR	RS19_HUMAN	P39019	K.HKELAPYDENWFYTR.A	16.552	2	0.9939	1	0.607343	9.003e-16
HKQSLEEAAK	DESP_HUMAN	P15924	R.HKQSLEEAAK.T	49.739	138	0.99248	1	2.19964	7.8125e-14
HKTGPNLHGLFGR	CYC_HUMAN	P99999	K.HKTGPNLHGLFGR.K	13.333	5	0.99314	0.999709	0.788683	9.76563e-18
HLAMAPNHAVVSR	TRFL_HUMAN	Q8TCD2	C.HLAMAPNHAVVSR.M	34.085	34	0.9926	1	1.29604	4.63867e-16
HLEEEEGQLK	INVO_HUMAN	P07476	K.HLEEEEGQLK.H	34.359	17	0.9906	1	0.72081	7.8125e-14
HLEEEEGQLKHLVQQEGQLK	INVO_HUMAN	P07476	K.HLEEEEGQLKHLVQQEGQLK.H	34.359	17	0.9914	1	1.21604	3.20583e-20
HLEEPLSLQELDTSSGVLLPFFDPDTNIVYLCGKG	COR1A_HUMAN	P31146	K.HLEEPLSLQELDTSSGVLLPFFDPDTNIVYLCGKG.D	31.67	9	0.99216	1	1.28165	1.15421e-21
HLEEQEGQLK	INVO_HUMAN	P07476	K.HLEEQEGQLK.H	34.359	17	0.99312	1	0.301918	1.5625e-13
HLEHPEQQDGQLK	INVO_HUMAN	P07476	K.HLEHPEQQDGQLK.H	34.359	17	0.99291	1	0.730154	3.90625e-17
HLEHQEGQLEVPEEQMGQLK	INVO_HUMAN	P07476	K.HLEHQEGQLEVPEEQMGQLK.Y	34.359	17	0.99356	1	1.4207	5.01599e-19
HLEINPDHPIVETLR	HS90B_HUMAN	P08238	K.HLEINPDHPIVETLR.Q	24.171	15	0.99352	1	0.97983	8.22002e-17
HLEINPDHSIIETLR	HS90A_HUMAN	P07900	K.HLEINPDHSIIETLR.Q	19.945	13	0.99332	1	1.46422	8.56892e-19
HLEQQEGQLEQLEEQEGQLK	INVO_HUMAN	P07476	K.HLEQQEGQLEQLEEQEGQLK.H	34.359	17	0.99241	1	0.314111	3.93017e-21
HLEQQEGQLK	INVO_HUMAN	P07476	K.HLEQQEGQLK.H	34.359	17	0.99252	1	0.520348	3.125e-13
HLEQQEGQPK	INVO_HUMAN	P07476	K.HLEQQEGQPK.H	34.359	17	0.99158	1	1.83761	1.5625e-13
HLGTLIGLNPVGPESQIR	BPIL1_HUMAN	Q8N4F0	V.HLGTLIGLNPVGPESQIR.Y	41.266	14	0.99378	1	0.902764	4.12926e-21
HLNEEELGQLQTQASDTSVVLSMDNNR	K2C78_HUMAN	Q8N1N4	K.HLNEEELGQLQTQASDTSVVLSMDNNR.Y	44.038	31	0.99172	1	0.153728	1.75764e-23
HLQLAIRNDEELNKLLGK	H2A1D_HUMAN	P20671	R.HLQLAIRNDEELNKLLGK.V	57.692	14	0.9937	1	0.980278	5.12908e-18
HLQLAIRNDEELNKLLGK	H2A1H_HUMAN	Q96KK5	R.HLQLAIRNDEELNKLLGK.V	64.062	15	0.9937	1	0.980278	5.12908e-18
HLQLAIRNDEELNKLLGK	H2A1J_HUMAN	Q99878	R.HLQLAIRNDEELNKLLGK.V	64.062	15	0.9937	1	0.980278	5.12908e-18
HLQLAIRNDEELNKLLGK	H2A1_HUMAN	P0C0S8	R.HLQLAIRNDEELNKLLGK.V	63.077	15	0.9937	1	0.980278	5.12908e-18
HLQLAIRNDEELNKLLGK	H2A2A_HUMAN	Q6FI13	R.HLQLAIRNDEELNKLLGK.V	63.077	16	0.9937	1	0.980278	5.12908e-18
HLQLAIRNDEELNKLLGK	H2A2C_HUMAN	Q16777	R.HLQLAIRNDEELNKLLGK.V	63.566	16	0.9937	1	0.980278	5.12908e-18
HLQLAIRNDEELNKLLGK	H2AJ_HUMAN	Q9BTM1	R.HLQLAIRNDEELNKLLGK.V	63.566	15	0.9937	1	0.980278	5.12908e-18
HLQLAIRNDEELNKLLGR	H2A1B_HUMAN	P04908	R.HLQLAIRNDEELNKLLGR.V	57.692	14	0.99157	1	1.28529	1.04539e-16
HLQLAIRNDEELNKLLGR	H2A1C_HUMAN	Q93077	R.HLQLAIRNDEELNKLLGR.V	63.077	15	0.99157	1	1.28529	1.04539e-16
HLQLAIRNDEELNKLLGR	H2A3_HUMAN	Q7L7L0	R.HLQLAIRNDEELNKLLGR.V	57.692	14	0.99157	1	1.28529	1.04539e-16
HLSMFILLPK	SPB5_HUMAN	P36952	K.HLSMFILLPK.D	29.067	8	0.99395	1	1.13677	1.5625e-13
HLTGEFEK	RAN_HUMAN	Q9CWI7	R.HLTGEFEK.K	20.37	4	0.98651	1	1.44173	7.42188e-11
HLTSNSPR	PLAK_HUMAN	P14923	K.HLTSNSPR.L	42.55	30	0.98867	1	1.94308	7.8125e-12
HLVPGAPFLLQALVR	CO4A_HUMAN	Q5JQM8	R.HLVPGAPFLLQALVR.E	3.727	4	0.98159	1	1.42634	6.20028e-14
HLVPGAPFLLQALVR	CO4B_HUMAN	Q9UIP5	R.HLVPGAPFLLQALVR.E	3.727	4	0.98159	1	1.42634	6.20028e-14
HLVQQEGQLEQQER	INVO_HUMAN	P07476	K.HLVQQEGQLEQQER.Q	34.359	17	0.99247	1	0.737659	7.8125e-18
HLVQQEGQLK	INVO_HUMAN	P07476	K.HLVQQEGQLK.H	34.359	17	0.99181	1	0.327241	3.125e-13
HLWDYTFGPEK	ARP2_HUMAN	P61160	K.HLWDYTFGPEK.L	15.99	5	0.99248	1	1.07089	1.05188e-13
HMWPGDIK	AMY1_HUMAN	P04745	K.HMWPGDIK.A	65.362	60	0.99327	1	0.568364	7.8125e-12
HMWPGDIK	AMY2B_HUMAN	P19961	K.HMWPGDIK.A	53.816	42	0.99327	1	0.568364	7.8125e-12
HMWPGDIK	AMYP_HUMAN	P04746	K.HMWPGDIK.A	45.597	37	0.99327	1	0.568364	7.8125e-12
HNESNSILFFGR	SPB13_HUMAN	Q9UIV8	R.HNESNSILFFGR.F	19.437	5	0.99383	1	0.980285	9.76563e-17
HNQLPLVIEFTEQTAPK	PDIA1_HUMAN	P07237	K.HNQLPLVIEFTEQTAPK.I	48.819	20	0.99252	1	1.26454	3.52783e-21
HNSSGSILFLGR	ILEU_HUMAN	P30740	R.HNSSGSILFLGR.F	59.367	17	0.99328	1	1.66048	1.95313e-16
HPEAEMAQNSVR	PLAK_HUMAN	P14923	R.HPEAEMAQNSVR.L	42.55	30	0.99292	1	0.869098	4.77649e-14
HPQEQPLW	PROL4_HUMAN	Q16378	R.HPQEQPLW.-	19.403	5	0.99278	1	1.86899	3.125e-11
HPYFYAPELL	ALBU_HUMAN	Q9P157	R.HPYFYAPELL.F	41.544	47	0.99309	1	1.39034	3.90625e-14
HPYFYAPELLFFAK	ALBU_HUMAN	Q9P157	R.HPYFYAPELLFFAK.R	41.544	47	0.99308	1	1.06092	2.44141e-19
HQGVMVGMGQK	ACTA_HUMAN	P62736	R.HQGVMVGMGQK.D	46.154	28	0.99326	1	1.40701	1.95313e-15
HQGVMVGMGQK	ACTBL_HUMAN	Q562R1	R.HQGVMVGMGQK.D	28.457	15	0.99326	1	1.40701	1.95313e-15
HQGVMVGMGQK	ACTB_HUMAN	Q96HG5	R.HQGVMVGMGQK.D	80.8	48	0.99326	1	1.40701	1.95313e-15
HQGVMVGMGQK	ACTC_HUMAN	P68032	R.HQGVMVGMGQK.D	48.806	32	0.99326	1	1.40701	1.95313e-15
HQGVMVGMGQK	ACTG_HUMAN	P63261	R.HQGVMVGMGQK.D	80.8	48	0.99326	1	1.40701	1.95313e-15
HQGVMVGMGQK	ACTH_HUMAN	P63267	R.HQGVMVGMGQK.D	46.277	28	0.99326	1	1.40701	1.95313e-15
HQGVMVGMGQK	ACTS_HUMAN	P68133	R.HQGVMVGMGQK.D	45.093	30	0.99326	1	1.40701	1.95313e-15
HQLYIDETVNSNIPTNLR	FIBB_HUMAN	P02675	K.HQLYIDETVNSNIPTNLR.V	26.477	10	0.99328	1	0.7321	1.46939e-19
HQPTAIIAK	TKT_HUMAN	P29401	K.HQPTAIIAK.T	30.337	13	0.99107	1	0.980394	1.5625e-12
HQTVPQNTGGK	TRFE_HUMAN	P02787	K.HQTVPQNTGGK.N	29.37	20	0.99257	1	2.07836	1.95313e-15
HSASQDGQDTIR	FILA_HUMAN	P20930	R.HSASQDGQDTIR.G	10.416	13	0.99238	1	0.26652	1.95313e-16
HSASQEGQDTIR	FILA_HUMAN	P20930	R.HSASQEGQDTIR.G	10.416	13	0.99157	1	-0.140252	1.95313e-16
HSGIGHGQASSAVR	FILA_HUMAN	P20930	R.HSGIGHGQASSAVR.D	10.416	13	0.99301	1	0.937421	2.50244e-19
HSQDLAFLSMLNDIAAVPATAMPFR	FAS_HUMAN	Q96IT0	R.HSQDLAFLSMLNDIAAVPATAMPFR.G	2.469	3	0.98697	1	0.982157	8.42439e-16
HSQVGQGQSSGPR	FILA_HUMAN	P20930	R.HSQVGQGQSSGPR.T	10.416	13	0.99296	1	1.78026	9.76563e-18
HSTIFENLANK	TRFE_HUMAN	P02787	K.HSTIFENLANK.A	29.37	20	0.99247	1	1.09866	1.95313e-15
HSTSQEGQDTIHGHPGSSSGGR	FILA_HUMAN	P20930	R.HSTSQEGQDTIHGHPGSSSGGR.Q	10.416	13	0.99263	1	0.175701	1.42293e-23
HSWSHHHEASTQADSSR	FILA_HUMAN	P20930	R.HSWSHHHEASTQADSSR.H	10.416	13	0.99369	1	1.46373	3.8147e-23
HTADRWR	HSPB1_HUMAN	Q9UC36	R.HTADRWR.V	94.146	23	0.98951	1	1.68757	7.8125e-11
HTDNVIQWLNAMDEIGLPK	IQGA1_HUMAN	P46940	R.HTDNVIQWLNAMDEIGLPK.I	8.69	9	0.9932	1	1.89017	1.12357e-18
HTNYTMEHIR	ACTN1_HUMAN	P12814	K.HTNYTMEHIR.V	13.901	10	0.99219	1	1.50915	3.03272e-14
HTNYTMEHIR	ACTN2_HUMAN	P35609	K.HTNYTMEHIR.V	5.369	4	0.99219	1	1.50915	3.03272e-14
HTNYTMEHIR	ACTN4_HUMAN	O43707	K.HTNYTMEHIR.V	42.371	27	0.99219	1	1.50915	3.03272e-14
HTQTSSGGQAASSHEQAR	FILA_HUMAN	P20930	R.HTQTSSGGQAASSHEQAR.S	10.416	13	0.98383	1	1.91078	3.12805e-24
HVAAGTQQPYTDGVR	PLAK_HUMAN	P14923	R.HVAAGTQQPYTDGVR.M	42.55	30	0.99266	1	1.33333	7.55457e-19
HVEDVPAFQALGSLNDLQFFR	ZA2G_HUMAN	P25311	K.HVEDVPAFQALGSLNDLQFFR.Y	43.96	13	0.99297	1	0.772375	6.88614e-24
HVEIDPEIQK	K2C4_HUMAN	P19013	L.HVEIDPEIQK.V	74.532	75	0.99381	1	0.517145	7.8125e-13
HVFGESDELIGQK	TPIS_HUMAN	P60174	R.HVFGESDELIGQK.V	53.012	9	0.99229	1	1.1374	9.76563e-18
HVFGQPAK	COR1A_HUMAN	P31146	R.HVFGQPAK.A	31.67	9	0.99267	1	0.941447	1.17188e-11
HVGTEGSMATVGLSQQLFDSALLLLQK	BPIL1_HUMAN	Q8N4F0	R.HVGTEGSMATVGLSQQLFDSALLLLQK.A	41.266	14	0.993	1	0.801867	2.58534e-22
HVIEIHIV	CAH6_HUMAN	P23280	R.HVIEIHIV.H	38.636	12	0.93808	1	0.469246	3.125e-11
HVIPMNPNTDDLFK	PLST_HUMAN	P13797	R.HVIPMNPNTDDLFK.A	16.984	8	0.99309	1	1.34321	2.08103e-15
HVLVTLGEK	MYL6_HUMAN	P60660	R.HVLVTLGEK.M	40.397	5	0.99313	1	0.673751	7.8125e-13
HWGGNVLGPK	RL7A_HUMAN	P62424	R.HWGGNVLGPK.S	9.774	2	0.9474	1	0.789051	4.01367e-14
HWPFMVVNDAGRPK	HSP7C_HUMAN	P11142	K.HWPFMVVNDAGRPK.V	39.783	24	0.99364	1	0.619727	2.36638e-16
HWPFQVINDGDKPK	HSP71_HUMAN	P08107	K.HWPFQVINDGDKPK.V	43.058	20	0.99341	1	0.800016	2.54782e-18
HYDGSYSTFGER	A2MG_HUMAN	P01023	K.HYDGSYSTFGER.Y	24.763	26	0.99264	1	0.211345	7.75844e-16
HYEGSTVPEKK	HPT_HUMAN	P00738	R.HYEGSTVPEKK.T	18.966	10	0.9929	1	1.12168	3.02417e-15
HYFQNTQGLIFVVDSNDRER	ARF1_HUMAN	P84077	R.HYFQNTQGLIFVVDSNDRER.V	30.939	3	0.99214	1	0.626996	7.87879e-20
HYFQNTQGLIFVVDSNDRER	ARF3_HUMAN	P61204	R.HYFQNTQGLIFVVDSNDRER.V	30.939	3	0.99214	1	0.626996	7.87879e-20
HYGGLTGLNK	PGAM1_HUMAN	P18669	R.HYGGLTGLNK.A	42.913	9	0.99227	1	1.52964	5.11231e-13
HYGGLTGLNK	PGAM2_HUMAN	P15259	R.HYGGLTGLNK.A	16.206	4	0.99227	1	1.52964	5.11231e-13
HYGGLTGLNK	PGAM4_HUMAN	Q8N0Y7	R.HYGGLTGLNK.A	27.165	6	0.99227	1	1.52964	5.11231e-13
HYGGLTGLNKAETAAK	PGAM1_HUMAN	P18669	R.HYGGLTGLNKAETAAK.H	42.913	9	0.99308	1	0.781362	8.78907e-21
HYGGLTGLNKAETAAK	PGAM2_HUMAN	P15259	R.HYGGLTGLNKAETAAK.H	16.206	4	0.99308	1	0.781362	8.78907e-21
HYGGLTGLNKAETAAK	PGAM4_HUMAN	Q8N0Y7	R.HYGGLTGLNKAETAAK.H	27.165	6	0.99308	1	0.781362	8.78907e-21
HYGPGWVSMANAGK	PPIB_HUMAN	P23284	K.HYGPGWVSMANAGK.D	36.111	7	0.99356	1	0.725869	3.06046e-16
IAESNHIK	ACTN4_HUMAN	O43707	R.IAESNHIK.L	42.371	27	0.99195	1	0.512912	1.5625e-11
IAEYMNHLI	AMY1_HUMAN	P04745	K.IAEYMNHLI.D	65.362	60	0.99187	1	1.30724	1.5625e-12
IAEYMNHLI	AMY2B_HUMAN	P19961	K.IAEYMNHLI.D	53.816	42	0.99187	1	1.30724	1.5625e-12
IAEYMNHLI	AMYP_HUMAN	P04746	K.IAEYMNHLI.D	45.597	37	0.99187	1	1.30724	1.5625e-12
IAEYMNHLIDIGV	AMY1_HUMAN	P04745	K.IAEYMNHLIDIGV.A	65.362	60	0.98966	1	1.28239	3.96456e-12
IAEYMNHLIDIGV	AMY2B_HUMAN	P19961	K.IAEYMNHLIDIGV.A	53.816	42	0.98966	1	1.28239	3.96456e-12
IAEYMNHLIDIGV	AMYP_HUMAN	P04746	K.IAEYMNHLIDIGV.A	45.597	37	0.98966	1	1.28239	3.96456e-12
IAEYMNHLIDIGVAGFR	AMY1_HUMAN	P04745	K.IAEYMNHLIDIGVAGFR.I	65.362	60	0.9929	1	0.700269	1.83106e-22
IAEYMNHLIDIGVAGFR	AMY2B_HUMAN	P19961	K.IAEYMNHLIDIGVAGFR.L	53.816	42	0.9929	1	0.700269	1.83106e-22
IAEYMNHLIDIGVAGFR	AMYP_HUMAN	P04746	K.IAEYMNHLIDIGVAGFR.L	45.597	37	0.9929	1	0.700269	1.83106e-22
IALLEEAR	EZRI_HUMAN	P15311	K.IALLEEAR.R	26.28	13	0.98947	0.510424	1.18815	3.125e-11
IALTDNALIAR	RL7_HUMAN	P18124	R.IALTDNALIAR.S	14.919	3	0.99277	1	2.0109	7.8125e-15
IANLQTDLSDGLR	FLNA_HUMAN	P21333	R.IANLQTDLSDGLR.L	1.964	4	0.99236	1	0.95233	1.43181e-13
IANVFTNAFR	PERM_HUMAN	P05164	R.IANVFTNAFR.Y	29.396	23	0.99253	1	1.43521	1.95313e-14
IAQHHVAPR	NCRP1_HUMAN	Q6ZVX7	V.IAQHHVAPR.T	24.727	4	0.98869	1	1.88971	7.8125e-12
IAQLEEQLDNETKER	MYH9_HUMAN	P35579	K.IAQLEEQLDNETKER.Q	15.357	24	0.99319	1	1.02325	8.37726e-15
IAQWQSFQLEGGLK	A2MG_HUMAN	P01023	R.IAQWQSFQLEGGLK.Q	24.763	26	0.99224	1	0.563275	3.90625e-18
IAVVGEGR	WDR1_HUMAN	O75083	R.IAVVGEGR.E	13.036	6	0.98102	1	1.56994	7.8125e-12
IDFSEFLSLLGDIATDYHK	S10A7_HUMAN	P31151	K.IDFSEFLSLLGDIATDYHK.Q	49.505	9	0.99303	1	1.35323	7.01599e-23
IDINMSGFNETDDLKR	PLST_HUMAN	P13797	R.IDINMSGFNETDDLKR.A	16.984	8	0.99225	1	0.913022	1.76718e-13
IDKQIDFR	DESP_HUMAN	P15924	R.IDKQIDFR.L	49.739	138	0.98547	1	1.11102	6.25e-11
IDLGGEPIK	AMY1_HUMAN	P04745	V.IDLGGEPIK.S	65.362	60	0.99312	1	1.02007	1.5625e-11
IDLGGEPIK	AMY2B_HUMAN	P19961	V.IDLGGEPIK.S	53.816	42	0.99312	1	1.02007	1.5625e-11
IDLGGEPIK	AMYP_HUMAN	P04746	V.IDLGGEPIK.S	45.597	37	0.99312	1	1.02007	1.5625e-11
IDLGGEPIKSSDYFGNGR	AMY1_HUMAN	P04745	V.IDLGGEPIKSSDYFGNGR.V	65.362	60	0.9933	1	0.810527	7.62259e-19
IDLGGEPIKSSDYFGNGR	AMY2B_HUMAN	P19961	V.IDLGGEPIKSSDYFGNGR.V	53.816	42	0.9933	1	0.810527	7.62259e-19
IDLGGEPIKSSDYFGNGR	AMYP_HUMAN	P04746	V.IDLGGEPIKSSDYFGNGR.V	45.597	37	0.9933	1	0.810527	7.62259e-19
IDNSQVESGSLEDDWDFLPPKK	CALR_HUMAN	P27797	K.IDNSQVESGSLEDDWDFLPPKK.I	16.067	4	0.93441	1	0.445877	4.90737e-13
IDQMWLPVVR	PGAM1_HUMAN	P18669	A.IDQMWLPVVR.T	42.913	9	0.9922	1	0.528959	1.21122e-11
IDQMWLPVVR	PGAM4_HUMAN	Q8N0Y7	A.IDQMWLPVVR.T	27.165	6	0.9922	1	0.528959	1.21122e-11
IDRAETLGR	EVPL_HUMAN	Q92817	R.IDRAETLGR.T	19.97	31	0.87613	1	0.503809	3.98438e-12
IDSGLYLGSGYFTAI	TRFL_HUMAN	Q8TCD2	R.IDSGLYLGSGYFTAI.Q	34.085	34	0.99283	1	0.91123	2.7992e-17
IDSGLYLGSGYFTAIQNLR	TRFL_HUMAN	Q8TCD2	R.IDSGLYLGSGYFTAIQNLR.K	34.085	34	0.99287	1	0.486088	3.11198e-22
IDSGLYLGSGYFTAIQNLRK	TRFL_HUMAN	Q8TCD2	R.IDSGLYLGSGYFTAIQNLRK.S	34.085	34	0.99271	1	1.17328	4.80568e-22
IDVPTLGPK	TGM3_HUMAN	Q08188	K.IDVPTLGPK.E	58.297	45	0.98372	1	0.942098	7.8125e-13
IDVVPIEPHALFLGIHGGK	IL1RA_HUMAN	P18510	K.IDVVPIEPHALFLGIHGGK.M	38.418	5	0.99285	1	1.49125	2.12681e-21
IEEELGSK	ENOA_HUMAN	Q6GMP2	R.IEEELGSK.A	64.977	24	0.99066	1	1.66107	1.5625e-11
IEEILDYLR	CAH6_HUMAN	P23280	K.IEEILDYLR.R	38.636	12	0.99341	1	0.876122	3.125e-12
IEEILDYLRR	CAH6_HUMAN	P23280	K.IEEILDYLRR.A	38.636	12	0.99243	1	1.3435	1.5625e-13
IEENILSSELLR	DSG3_HUMAN	P32926	R.IEENILSSELLR.F	9.61	7	0.99331	1	2.15597	3.59375e-15
IEIDPQFQVVR	K2C78_HUMAN	Q8N1N4	K.IEIDPQFQVVR.T	44.038	31	0.99386	1	0.865181	7.8125e-15
IEISELNR	K22E_HUMAN	P35908	K.IEISELNR.V	40.845	30	0.99307	1	0.994217	3.125e-11
IEISELNR	K2C1_HUMAN	P04264	K.IEISELNR.V	66.77	58	0.99307	1	0.994217	3.125e-11
IENHEGVR	KPYM_HUMAN	Q9BWB5	K.IENHEGVR.R	49.153	22	0.9928	1	2.24552	7.8125e-12
IEPHTGLLLLSVQK	DESP_HUMAN	P15924	R.IEPHTGLLLLSVQK.R	49.739	138	0.99116	1	1.1521	3.22266e-13
IEQDYWQVPR	GBP6_HUMAN	Q6ZN66	R.IEQDYWQVPR.K	35.387	19	0.99299	1	0.123964	9.96094e-14
IEVEKPFAIAKE	PPIB_HUMAN	P23284	K.IEVEKPFAIAKE.-	36.111	7	0.99283	1	1.02064	5.37994e-11
IEVLEEELR	DESP_HUMAN	P15924	K.IEVLEEELR.L	49.739	138	0.9932	1	1.04625	1.5625e-12
IFENGYDPV	ELNE_HUMAN	P08246	R.IFENGYDPV.N	28.464	9	0.98641	1	0.0836119	7.84375e-12
IFENGYDPVNLLNDIV	ELNE_HUMAN	P08246	R.IFENGYDPVNLLNDIV.I	28.464	9	0.983	1	0.193466	1.45847e-14
IFGPIWNR	G6PD_HUMAN	P11413	R.IFGPIWNR.D	10.097	4	0.99359	1	1.25017	1.65039e-11
IFGSYDPR	CATG_HUMAN	P08311	R.IFGSYDPR.R	29.412	10	0.99338	1	0.666729	7.8125e-12
IFIHSLDV	SPLC2_HUMAN	Q96DR5	R.IFIHSLDV.N	49.799	15	0.99243	1	1.11075	3.125e-11
IFRDGEEAGAYDGPR	PDIA3_HUMAN	P30101	K.IFRDGEEAGAYDGPR.T	16.832	6	0.99173	1	0.6708	1.01554e-13
IFTPLLHQIELEKPKPIPYIYGSR	G6PD_HUMAN	P11413	R.IFTPLLHQIELEKPKPIPYIYGSR.G	10.097	4	0.96807	1	1.33171	5.02452e-14
IFVDIEKLPWSK	PYGL_HUMAN	P06737	R.IFVDIEKLPWSK.A	6.139	4	0.94846	1	1.60928	6.33144e-11
IGAEVYHNLK	ENOA_HUMAN	Q6GMP2	R.IGAEVYHNLK.N	64.977	24	0.99262	1	0.639589	3.90625e-14
IGDEDVGR	PPIB_HUMAN	P23284	R.IGDEDVGR.V	36.111	7	0.99246	1	0.87328	7.8125e-12
IGEHTPSALAIMENANVLAR	ALDOA_HUMAN	P04075	K.IGEHTPSALAIMENANVLAR.Y	34.341	13	0.99372	1	0.625947	3.05176e-26
IGFPWSEIR	EZRI_HUMAN	P15311	K.IGFPWSEIR.N	26.28	13	0.99273	1	0.88621	8.59375e-13
IGFPWSEIR	MOES_HUMAN	P26038	K.IGFPWSEIR.N	15.598	8	0.99273	1	0.88621	8.59375e-13
IGFPWSEIR	RADI_HUMAN	P35241	K.IGFPWSEIR.N	6.69	4	0.99273	1	0.88621	8.59375e-13
IGGIGTVPVGR	EF1A1_HUMAN	P68104	K.IGGIGTVPVGR.V	36.58	16	0.99312	1	0.787915	1.95313e-15
IGGIGTVPVGR	EF1A2_HUMAN	Q05639	K.IGGIGTVPVGR.V	18.79	9	0.99312	1	0.787915	1.95313e-15
IGGIGTVPVGR	EF1A3_HUMAN	Q5VTE0	K.IGGIGTVPVGR.V	36.58	16	0.99312	1	0.787915	1.95313e-15
IGGILANELSVDEAALHAAVIAINEAIDR	IQGA1_HUMAN	P46940	K.IGGILANELSVDEAALHAAVIAINEAIDR.R	8.69	9	0.99104	1	2.00593	5.73063e-25
IGHPAPNFK	PRDX1_HUMAN	Q06830	K.IGHPAPNFK.A	48.744	12	0.99271	1	0.766087	9.96094e-13
IGLDLPALNMQR	PERM_HUMAN	P05164	R.IGLDLPALNMQR.S	29.396	23	0.99346	1	0.744405	1.23047e-15
IGLFGGAGVGK	ATPB_HUMAN	P06576	K.IGLFGGAGVGK.T	30.435	10	0.99316	1	1.1398	3.90625e-15
IGLVRPGTALELLEAQAATGFIVDPV	DESP_HUMAN	P15924	K.IGLVRPGTALELLEAQAATGFIVDPV.S	49.739	138	0.94832	1	1.16253	1.99163e-15
IGLVRPGTALELLEAQAATGFIVDPVSNLR	DESP_HUMAN	P15924	K.IGLVRPGTALELLEAQAATGFIVDPVSNLR.L	49.739	138	0.97058	1	0.696662	3.59782e-19
IGMIDMFHK	S10A7_HUMAN	P31151	I.IGMIDMFHK.Y	49.505	9	0.99133	1	0.997405	2.34375e-11
IGMIDMFHK	S1A7A_HUMAN	Q86SG5	I.IGMIDMFHK.Y	10.891	2	0.99133	1	0.997405	2.34375e-11
IGMIGWNFGQFEEDILSI	TGM3_HUMAN	Q08188	R.IGMIGWNFGQFEEDILSI.C	58.297	45	0.9927	1	0.596422	8.78757e-14
IGNFSTDIKDSK	PLSL_HUMAN	P13796	K.IGNFSTDIKDSK.A	25.359	10	0.99371	1	0.696172	9.42212e-15
IGYNPDTVAFVPI	EF1A1_HUMAN	P68104	K.IGYNPDTVAFVPI.S	36.58	16	0.97244	1	1.52044	3.21367e-11
IGYNPDTVAFVPI	EF1A3_HUMAN	Q5VTE0	K.IGYNPDTVAFVPI.S	36.58	16	0.97244	1	1.52044	3.21367e-11
IHFPLATYAPVISAEK	TBA1A_HUMAN	Q71U36	R.IHFPLATYAPVISAEK.A	37.694	14	0.99114	1	1.40311	3.73302e-16
IHFPLATYAPVISAEK	TBA1B_HUMAN	P68363	R.IHFPLATYAPVISAEK.A	40.798	15	0.99114	1	1.40311	3.73302e-16
IHFPLATYAPVISAEK	TBA1C_HUMAN	Q9BQE3	R.IHFPLATYAPVISAEK.A	40.98	15	0.99114	1	1.40311	3.73302e-16
IHFPLATYAPVISAEK	TBA3C_HUMAN	Q13748	R.IHFPLATYAPVISAEK.A	32.444	12	0.99114	1	1.40311	3.73302e-16
IHFPLATYAPVISAEK	TBA3E_HUMAN	Q6PEY2	R.IHFPLATYAPVISAEK.A	26.222	9	0.99114	1	1.40311	3.73302e-16
IHFPLATYAPVISAEK	TBA4A_HUMAN	P68366	R.IHFPLATYAPVISAEK.A	34.598	13	0.99114	1	1.40311	3.73302e-16
IHGFDLAAINTQR	PERL_HUMAN	P22079	R.IHGFDLAAINTQR.C	32.865	16	0.99301	1	1.57689	2.92969e-17
IHLISTQSAIPYALR	FIBG_HUMAN	Q9UC63	K.IHLISTQSAIPYALR.V	20.971	7	0.99198	1	1.26502	6.49306e-18
IHVLPIDDTVEGITGNLFEV	TERA_HUMAN	P55072	R.IHVLPIDDTVEGITGNLFEV.Y	12.655	8	0.99265	1	1.3223	1.43676e-15
IIAATIENAQPI	K1C16_HUMAN	P08779	K.IIAATIENAQPI.L	72.304	50	0.9932	1	0.852078	1.16213e-11
IIAATIENAQPILQIDNAR	K1C16_HUMAN	P08779	K.IIAATIENAQPILQIDNAR.L	72.304	50	0.99361	1	0.980885	1.24489e-23
IIALDGDTK	TKT_HUMAN	P29401	R.IIALDGDTK.N	30.337	13	0.99331	1	0.6092	1.5625e-12
IIAPPERK	ACTA_HUMAN	P62736	K.IIAPPERK.Y	46.154	28	0.99293	1	0.673994	1.5625e-11
IIAPPERK	ACTBL_HUMAN	Q562R1	K.IIAPPERK.Y	28.457	15	0.99293	1	0.673994	1.5625e-11
IIAPPERK	ACTB_HUMAN	Q96HG5	K.IIAPPERK.Y	80.8	48	0.99293	1	0.673994	1.5625e-11
IIAPPERK	ACTC_HUMAN	P68032	K.IIAPPERK.Y	48.806	32	0.99293	1	0.673994	1.5625e-11
IIAPPERK	ACTG_HUMAN	P63261	K.IIAPPERK.Y	80.8	48	0.99293	1	0.673994	1.5625e-11
IIAPPERK	ACTH_HUMAN	P63267	K.IIAPPERK.Y	46.277	28	0.99293	1	0.673994	1.5625e-11
IIAPPERK	ACTS_HUMAN	P68133	K.IIAPPERK.Y	45.093	30	0.99293	1	0.673994	1.5625e-11
IIEGGIYDADLNDER	CYTT_HUMAN	P09228	R.IIEGGIYDADLNDER.V	41.135	8	0.99287	1	0.350514	4.88281e-20
IIEIEDEAEKWQK	TRI29_HUMAN	Q14134	K.IIEIEDEAEKWQK.E	14.116	8	0.99168	1	1.42181	1.23721e-16
IIELPFQNK	SPB5_HUMAN	P36952	K.IIELPFQNK.H	29.067	8	0.99148	1	1.37386	3.20313e-12
IIIKNFDIPK	PIP_HUMAN	P12273	K.IIIKNFDIPK.S	52.74	9	0.99201	1	1.30588	7.98828e-13
IIMTAAAK	AL3A1_HUMAN	P30838	K.IIMTAAAK.H	30.243	11	0.9898	1	1.16579	1.5625e-11
IINEPTAAAIAYGLDKK	HSP72_HUMAN	P54652	R.IINEPTAAAIAYGLDKK.G	17.84	11	0.95177	1	0.703756	2.23356e-12
IINEPTAAAIAYGLDKK	HSP7C_HUMAN	P11142	R.IINEPTAAAIAYGLDKK.V	39.783	24	0.95177	1	0.703756	2.23356e-12
IINEPTAAAIAYGLDKR	GRP78_HUMAN	P11021	R.IINEPTAAAIAYGLDKR.E	25.994	13	0.99305	1	1.10419	4.43414e-15
IINEPTAAAIAYGLDR	HSP71_HUMAN	P08107	R.IINEPTAAAIAYGLDR.T	43.058	20	0.99304	1	0.722926	2.44141e-21
IINEPTAAAIAYGLDR	HSP76_HUMAN	P17066	R.IINEPTAAAIAYGLDR.R	12.442	7	0.99304	1	0.722926	2.44141e-21
IIPGGIYDADLNDEWVQR	CYTS_HUMAN	P01036	R.IIPGGIYDADLNDEWVQR.A	60.993	15	0.98688	1	-0.364975	1.2207e-23
IIPGGIYNADLNDEWVQR	CYTN_HUMAN	P01037	R.IIPGGIYNADLNDEWVQR.A	62.411	13	0.99109	1	0.335902	1.2207e-23
IIQLLDDYPK	RLA0L_HUMAN	Q8NHW5	K.IIQLLDDYPK.C	17.35	5	0.99333	1	1.26296	3.125e-13
IIQLLDDYPK	RLA0_HUMAN	P05388	K.IIQLLDDYPK.C	17.35	5	0.99333	1	1.26296	3.125e-13
IIRQEPSDSPMFIINR	DSG1_HUMAN	Q02413	K.IIRQEPSDSPMFIINR.N	15.253	10	0.99286	1	1.36204	1.46061e-14
IISTTTLNK	K2C4_HUMAN	P19013	K.IISTTTLNK.R	74.532	75	0.9933	1	1.37837	1.5625e-12
IISTTTLNKR	K2C4_HUMAN	P19013	K.IISTTTLNKR.R	74.532	75	0.99311	1	1.3949	1.5625e-13
IITLTGPTNAIFK	PCBP1_HUMAN	Q15365	R.IITLTGPTNAIFK.A	12.36	2	0.99314	1	1.18684	8.65357e-16
IIVDELKQEVISTSSK	GBLP_HUMAN	P63244	K.IIVDELKQEVISTSSK.A	18.927	4	0.99292	1	1.23782	3.71678e-20
IKDAFDRNPELQNLLLDDFFK	6PGD_HUMAN	P52209	K.IKDAFDRNPELQNLLLDDFFK.S	41.615	17	0.99287	1	1.03035	9.7408e-20
IKDLFPDGSISSSTK	SPB13_HUMAN	Q9UIV8	K.IKDLFPDGSISSSTK.L	19.437	5	0.99244	1	1.16907	1.60525e-17
IKDPDASKPEDWDER	CALR_HUMAN	P27797	K.IKDPDASKPEDWDER.A	16.067	4	0.99212	1	1.17833	7.2979e-17
IKIIAPPER	ACTA_HUMAN	P62736	K.IKIIAPPER.K	46.154	28	0.93096	1	0.803172	1.32813e-11
IKIIAPPER	ACTBL_HUMAN	Q562R1	K.IKIIAPPER.K	28.457	15	0.93096	1	0.803172	1.32813e-11
IKIIAPPER	ACTB_HUMAN	Q96HG5	K.IKIIAPPER.K	80.8	48	0.93096	1	0.803172	1.32813e-11
IKIIAPPER	ACTC_HUMAN	P68032	K.IKIIAPPER.K	48.806	32	0.93096	1	0.803172	1.32813e-11
IKIIAPPER	ACTG_HUMAN	P63261	K.IKIIAPPER.K	80.8	48	0.93096	1	0.803172	1.32813e-11
IKIIAPPER	ACTH_HUMAN	P63267	K.IKIIAPPER.K	46.277	28	0.93096	1	0.803172	1.32813e-11
IKIIAPPER	ACTS_HUMAN	P68133	K.IKIIAPPER.K	45.093	30	0.93096	1	0.803172	1.32813e-11
IKIIAPPERK	ACTA_HUMAN	P62736	K.IKIIAPPERK.Y	46.154	28	0.99043	1	2.09695	1.41717e-11
IKIIAPPERK	ACTBL_HUMAN	Q562R1	K.IKIIAPPERK.Y	28.457	15	0.99043	1	2.09695	1.41717e-11
IKIIAPPERK	ACTB_HUMAN	Q96HG5	K.IKIIAPPERK.Y	80.8	48	0.99043	1	2.09695	1.41717e-11
IKIIAPPERK	ACTC_HUMAN	P68032	K.IKIIAPPERK.Y	48.806	32	0.99043	1	2.09695	1.41717e-11
IKIIAPPERK	ACTG_HUMAN	P63261	K.IKIIAPPERK.Y	80.8	48	0.99043	1	2.09695	1.41717e-11
IKIIAPPERK	ACTH_HUMAN	P63267	K.IKIIAPPERK.Y	46.277	28	0.99043	1	2.09695	1.41717e-11
IKIIAPPERK	ACTS_HUMAN	P68133	K.IKIIAPPERK.Y	45.093	30	0.99043	1	2.09695	1.41717e-11
IKIPDYSDSFK	BPI_HUMAN	Q9H203	R.IKIPDYSDSFK.I	10.062	4	0.99341	1	1.72078	1.57227e-14
IKNDLNLKK	DESP_HUMAN	P15924	K.IKNDLNLKK.S	49.739	138	0.91692	1	1.04447	9.46143e-12
IKPHLMSQELPEDWDKQPVK	PDIA1_HUMAN	P07237	K.IKPHLMSQELPEDWDKQPVK.V	48.819	20	0.99309	1	0.913231	1.32186e-17
IKSDYAQLLEDMQNAFR	VATA_HUMAN	P38606	K.IKSDYAQLLEDMQNAFR.S	9.076	2	0.99034	1	1.63097	5.18886e-14
IKVLEQDKAR	DESP_HUMAN	P15924	K.IKVLEQDKAR.L	49.739	138	0.99089	1	1.13322	3.125e-13
IKWGDAGAEYVVESTGVFTTMEK	G3P_HUMAN	P04406	K.IKWGDAGAEYVVESTGVFTTMEK.A	65.97	33	0.99367	1	0.514737	4.38151e-23
ILATPPQEDAPSVDIANIR	TKT_HUMAN	P29401	K.ILATPPQEDAPSVDIANIR.M	30.337	13	0.99323	1	0.520241	7.6294e-25
ILDSNEPCGGQKG	A2ML1_HUMAN	A8K2U0	K.ILDSNEPCGGQKG.F	27.854	29	0.99302	1	0.714262	1.34231e-11
ILDSVGIEADDDRLNK	RLA2_HUMAN	P05387	K.ILDSVGIEADDDRLNK.V	47.826	4	0.99334	1	1.15504	6.11779e-20
ILDSVGIEADDDRLNKVISELNGK	RLA2_HUMAN	P05387	K.ILDSVGIEADDDRLNKVISELNGK.N	47.826	4	0.94457	1	0.737378	2.56571e-14
ILDWHVANTDKK	TALDO_HUMAN	P37837	R.ILDWHVANTDKK.S	24.926	8	0.99322	1	1.09574	7.4704e-14
ILEFFGLK	PDIA1_HUMAN	P07237	R.ILEFFGLK.K	48.819	20	0.99204	1	1.25254	3.125e-11
ILFIFIDSDHTDNQR	PDIA1_HUMAN	P07237	K.ILFIFIDSDHTDNQR.I	48.819	20	0.99338	1	1.27371	8.2886e-17
ILGADTSVDLEETGR	ATPA_HUMAN	P25705	R.ILGADTSVDLEETGR.V	20.253	7	0.99279	1	0.970168	2.44141e-20
ILGGHLDAK	HPTR_HUMAN	P00739	R.ILGGHLDAK.G	8.621	4	0.9915	1	1.63074	1.5625e-12
ILGGHLDAK	HPT_HUMAN	P00738	R.ILGGHLDAK.G	18.966	10	0.9915	1	1.63074	1.5625e-12
ILGGTEAEEGSWPWQVSLR	TM11D_HUMAN	O60235	R.ILGGTEAEEGSWPWQVSLR.L	6.699	2	0.9937	1	1.67012	5.01294e-19
ILGIPYKNNDLSMFVLLPNDIDGLEK	SPB13_HUMAN	Q9UIV8	K.ILGIPYKNNDLSMFVLLPNDIDGLEK.I	19.437	5	0.99254	1	1.16855	2.32688e-12
ILGLLDAYLK	EF1G_HUMAN	P26641	R.ILGLLDAYLK.T	10.755	4	0.9931	1	1.40578	2.65625e-12
ILGQNGISDLVK	LDHA_HUMAN	P00338	C.ILGQNGISDLVK.V	29.217	10	0.99297	1	1.39602	7.8125e-15
ILLAELEQLK	VIME_HUMAN	Q96ML2	K.ILLAELEQLK.G	28.112	13	0.99297	1	0.885594	6.25e-13
ILLAELEQLKGQGK	VIME_HUMAN	Q96ML2	K.ILLAELEQLKGQGK.S	28.112	13	0.99253	1	0.814346	2.34375e-17
ILLANFLAQTEALMR	G6PI_HUMAN	P06744	K.ILLANFLAQTEALMR.G	38.351	14	0.99289	1	1.94234	1.95313e-19
ILLNPQDK	PIGR_HUMAN	P01833	R.ILLNPQDK.D	27.88	25	0.99298	1	0.902677	6.25e-11
ILLNPQDKDGSFSVVI	PIGR_HUMAN	P01833	R.ILLNPQDKDGSFSVVI.T	27.88	25	0.99381	1	0.551968	1.30255e-15
ILLNPQDKDGSFSVVITGLR	PIGR_HUMAN	P01833	R.ILLNPQDKDGSFSVVITGLR.K	27.88	25	0.99264	1	0.345616	1.35453e-21
ILLNPQDKDGSFSVVITGLRK	PIGR_HUMAN	P01833	R.ILLNPQDKDGSFSVVITGLRK.E	27.88	25	0.99326	1	1.16732	1.97968e-21
ILLPDDIEDESTGLK	ILEU_HUMAN	P30740	V.ILLPDDIEDESTGLK.K	59.367	17	0.9934	1	0.192897	1.22056e-15
ILLTEPPMNPTK	ARP2_HUMAN	P61160	K.ILLTEPPMNPTK.N	15.99	5	0.99289	1	0.946599	1.16718e-12
ILNEMRDQYEK	K1C14_HUMAN	P02533	R.ILNEMRDQYEK.M	60.593	45	0.99298	1	0.681231	4.86369e-14
ILNEMRDQYEK	K1C17_HUMAN	Q8N1P6	R.ILNEMRDQYEK.M	60.648	30	0.99298	1	0.681231	4.86369e-14
ILNEMRDQYEQMAEK	K1C16_HUMAN	P08779	R.ILNEMRDQYEQMAEK.N	72.304	50	0.99316	1	0.748338	3.99412e-16
ILNVGDIGGNETVTLR	TGM1_HUMAN	P22735	K.ILNVGDIGGNETVTLR.Q	26.683	16	0.9929	1	0.627044	2.44141e-21
ILNVHVPR	BPIL1_HUMAN	Q8N4F0	R.ILNVHVPR.L	41.266	14	0.99391	1	0.946997	1.5625e-11
ILQHKDELNADHPFIYIIR	SPB5_HUMAN	P36952	R.ILQHKDELNADHPFIYIIR.H	29.067	8	0.99298	1	0.833245	5.46786e-16
ILTATIENNR	K1C13_HUMAN	P13646	K.ILTATIENNR.V	69.869	59	0.99308	1	0.424965	7.8125e-14
ILTATIENNRV	K1C13_HUMAN	P13646	K.ILTATIENNRV.I	69.869	59	0.9902	1	0.826672	8.03778e-15
ILTATIENNRVILEIDNAR	K1C13_HUMAN	P13646	K.ILTATIENNRVILEIDNAR.L	69.869	59	0.99318	1	0.660254	2.84127e-21
ILTATVDNANILLQIDNAR	K1C17_HUMAN	Q8N1P6	K.ILTATVDNANILLQIDNAR.L	60.648	30	0.99345	1	0.943674	6.65148e-18
ILTATVDNANVLLQIDNAR	K1C14_HUMAN	P02533	K.ILTATVDNANVLLQIDNAR.L	60.593	45	0.99363	1	1.22156	8.81917e-20
ILTQDTPEFFIDQGHAK	LPLC1_HUMAN	Q9H4V6	K.ILTQDTPEFFIDQGHAK.V	45.041	20	0.99361	1	0.735028	2.44141e-22
ILTSVDQYLELIGNSLPGTTAK	NIBL1_HUMAN	Q96TA1	K.ILTSVDQYLELIGNSLPGTTAK.S	12.824	6	0.99351	1	1.15536	1.75372e-14
ILTTGFSR	COR1A_HUMAN	P31146	K.ILTTGFSR.M	31.67	9	0.83936	1	1.15065	1.5625e-11
ILVNQLSVDDVNVLTCATGTLSNLTCNNSKN	PLAK_HUMAN	P14923	K.ILVNQLSVDDVNVLTCATGTLSNLTCNNSKN.K	42.55	30	0.98218	1	2.26775	1.0159e-12
ILVVNAAYFVGK	SPB5_HUMAN	P36952	K.ILVVNAAYFVGK.W	29.067	8	0.99313	1	1.64765	9.76563e-17
IMDPNIVGSEHYDVAR	ATPB_HUMAN	P06576	R.IMDPNIVGSEHYDVAR.G	30.435	10	0.99395	1	1.04267	3.58974e-11
IMGIPEEEQMGLLR	MYH9_HUMAN	P35579	R.IMGIPEEEQMGLLR.V	15.357	24	0.99341	1	0.184789	3.50359e-15
IMNTFSVMPSPK	TBB2A_HUMAN	Q13885	R.IMNTFSVMPSPK.V	42.247	18	0.99243	1	1.51984	1.12821e-13
IMNTFSVVPSPK	TBB3_HUMAN	Q13509	R.IMNTFSVVPSPK.V	26.889	12	0.99281	1	1.70358	4.88281e-17
IMNTFSVVPSPK	TBB5_HUMAN	P07437	R.IMNTFSVVPSPK.V	40.09	16	0.99281	1	1.70358	4.88281e-17
IMSLVDPNHSGLVTFQAFIDFMSR	ACTN4_HUMAN	O43707	R.IMSLVDPNHSGLVTFQAFIDFMSR.E	42.371	27	0.99213	1	1.24775	3.83231e-19
INGIPQQHTQVLFIAK	CEAM5_HUMAN	P06731	R.INGIPQQHTQVLFIAK.I	3.561	2	0.99282	1	1.2408	3.73876e-18
INKLHSEGDQLLAAEHPGR	PEPL_HUMAN	O60437	R.INKLHSEGDQLLAAEHPGR.N	32.517	52	0.99183	1	1.14895	1.82119e-18
INLGFSNLK	DMBT1_HUMAN	Q9Y4V9	R.INLGFSNLK.L	14.463	9	0.99314	1	1.05558	1.5625e-12
INNFSADIKDSK	PLST_HUMAN	P13797	K.INNFSADIKDSK.A	16.984	8	0.99173	1	1.15209	3.18359e-15
INSWVESQTNEK	SPB3_HUMAN	Q8IXI3	K.INSWVESQTNEK.I	42.821	15	0.99264	1	0.354054	1.02783e-16
INSWVESQTNEK	SPB4_HUMAN	P48594	K.INSWVESQTNEK.I	27.179	10	0.99264	1	0.354054	1.02783e-16
INVYYNEAAGNKYVPR	TBB2A_HUMAN	Q13885	R.INVYYNEAAGNKYVPR.A	42.247	18	0.99201	1	1.34871	2.28144e-21
IPDWFLNR	RS18_HUMAN	P62269	K.IPDWFLNR.Q	11.184	2	0.99199	1	1.30216	1.5625e-11
IPIEDGSGEVVLSR	CO3_HUMAN	P01024	R.IPIEDGSGEVVLSR.K	20.204	22	0.99312	1	1.66264	4.88281e-19
IPIQQALLSGMISEELAQLLQDESSYEKDLTDPISK	EVPL_HUMAN	Q92817	R.IPIQQALLSGMISEELAQLLQDESSYEKDLTDPISK.E	19.97	31	0.99159	1	0.954788	4.82908e-26
IPPPPPAPY	SMR3B_HUMAN	P02814	R.IPPPPPAPY.G	67.089	19	0.99272	1	0.867852	3.90625e-13
IPPPPPAPYGP	SMR3B_HUMAN	P02814	R.IPPPPPAPYGP.G	67.089	19	0.99351	1	0.972325	1.01539e-13
IPPPPPAPYGPGIFPPPPP	SMR3B_HUMAN	P02814	R.IPPPPPAPYGPGIFPPPPP.Q	67.089	19	0.99223	1	1.18465	1.11484e-16
IPPPPPAPYGPGIFPPPPPQ	SMR3B_HUMAN	P02814	R.IPPPPPAPYGPGIFPPPPPQ.P	67.089	19	0.99266	1	1.20797	1.96363e-11
IPPPPPAPYGPGIFPPPPPQP	SMR3B_HUMAN	P02814	R.IPPPPPAPYGPGIFPPPPPQP.-	67.089	19	0.99388	1	0.591461	1.24249e-13
IQASTMAFK	TAGL2_HUMAN	P37802	K.IQASTMAFK.Q	39.698	7	0.97316	1	0.736707	7.07031e-11
IQEAGTEVVK	MDHM_HUMAN	P40926	R.IQEAGTEVVK.A	27.219	7	0.93931	1	1.09037	7.03125e-13
IQLMNSGIGWFQPDVLK	LPLC1_HUMAN	Q9H4V6	R.IQLMNSGIGWFQPDVLK.N	45.041	20	0.99363	1	1.25835	2.53906e-21
IQLVEEELDR	TPM1_HUMAN	Q96IK2	R.IQLVEEELDR.A	4.93	2	0.99298	1	1.81089	1.5625e-13
IQLVEEELDR	TPM2_HUMAN	P07951	R.IQLVEEELDR.A	8.803	3	0.99298	1	1.81089	1.5625e-13
IQLVEEELDR	TPM3_HUMAN	P06753	R.IQLVEEELDR.A	10.211	4	0.99298	1	1.81089	1.5625e-13
IQLVEEELDR	TPM4_HUMAN	Q9UCS3	R.IQLVEEELDR.A	16.129	5	0.99298	1	1.81089	1.5625e-13
IQLVEEELDRAQER	TPM1_HUMAN	Q96IK2	R.IQLVEEELDRAQER.L	4.93	2	0.99275	1	1.04691	1.17115e-13
IQLVEEELDRAQER	TPM2_HUMAN	P07951	R.IQLVEEELDRAQER.L	8.803	3	0.99275	1	1.04691	1.17115e-13
IQLVEEELDRAQER	TPM3_HUMAN	P06753	R.IQLVEEELDRAQER.L	10.211	4	0.99275	1	1.04691	1.17115e-13
IQLVEEELDRAQER	TPM4_HUMAN	Q9UCS3	R.IQLVEEELDRAQER.L	16.129	5	0.99275	1	1.04691	1.17115e-13
IQQVVDNPQHK	SPLC2_HUMAN	Q96DR5	V.IQQVVDNPQHK.T	49.799	15	0.99331	1	1.04094	1.89746e-13
IQSQFTDAQK	DESP_HUMAN	P15924	K.IQSQFTDAQK.H	49.739	138	0.99308	1	1.09997	1.5625e-13
IQVLVEPDHFK	LEG3_HUMAN	P17931	K.IQVLVEPDHFK.V	19.6	4	0.99352	1	1.31455	3.327e-13
IQVWHEEHR	MOES_HUMAN	P26038	R.IQVWHEEHR.G	15.598	8	0.9929	1	1.4613	7.8125e-13
IREEYPDR	TBB1_HUMAN	Q9H4B7	K.IREEYPDR.I	6.43	4	0.9936	1	0.607882	9.32246e-11
IREEYPDR	TBB2A_HUMAN	Q13885	K.IREEYPDR.I	42.247	18	0.9936	1	0.607882	9.32246e-11
IREEYPDR	TBB5_HUMAN	P07437	K.IREEYPDR.I	40.09	16	0.9936	1	0.607882	9.32246e-11
IREEYPDR	TBB8B_HUMAN	A6NNZ2	K.IREEYPDR.I	9.685	5	0.9936	1	0.607882	9.32246e-11
IREEYPDR	TBB8_HUMAN	Q3ZCM7	K.IREEYPDR.I	13.063	6	0.9936	1	0.607882	9.32246e-11
IREEYPDR	YI016_HUMAN	A6NKZ8	K.IREEYPDR.I	11.559	5	0.9936	1	0.607882	9.32246e-11
IRGLVPPNASR	LEG7_HUMAN	P47929	R.IRGLVPPNASR.F	56.618	11	0.99181	1	0.332319	1.08373e-11
IRIDSLSAQLSQLQK	LMNA_HUMAN	P02545	R.IRIDSLSAQLSQLQK.Q	24.096	14	0.99283	1	1.24417	4.71007e-16
IRLENEIQTYR	K1C10_HUMAN	P13645	K.IRLENEIQTYR.S	52.74	27	0.993	1	1.25474	1.58203e-14
ISAPNVDFNLEGPK	AHNK_HUMAN	Q09666	R.ISAPNVDFNLEGPK.V	19.508	36	0.99155	1	0.783524	3.49724e-17
ISDTSVVLSMDNNR	K2C3_HUMAN	P12035	H.ISDTSVVLSMDNNR.S	32.006	23	0.99232	1	0.829429	2.33154e-17
ISDTSVVLSMDNNR	K2C6A_HUMAN	P02538	H.ISDTSVVLSMDNNR.N	70.035	77	0.99232	1	0.829429	2.33154e-17
ISDTSVVLSMDNNR	K2C6B_HUMAN	P04259	H.ISDTSVVLSMDNNR.N	68.44	73	0.99232	1	0.829429	2.33154e-17
ISDTSVVLSMDNNR	K2C6C_HUMAN	P48668	H.ISDTSVVLSMDNNR.N	67.553	75	0.99232	1	0.829429	2.33154e-17
ISEDKNPDYR	PLAK_HUMAN	P14923	R.ISEDKNPDYR.K	42.55	30	0.99358	1	0.375128	8.2666e-14
ISEDKNPDYRK	PLAK_HUMAN	P14923	R.ISEDKNPDYRK.R	42.55	30	0.99256	1	1.38083	1.25349e-12
ISEQFTAMFR	TBB2A_HUMAN	Q13885	R.ISEQFTAMFR.R	42.247	18	0.99147	1	1.42179	3.90625e-14
ISEQFTAMFR	TBB3_HUMAN	Q13509	R.ISEQFTAMFR.R	26.889	12	0.99147	1	1.42179	3.90625e-14
ISEQFTAMFR	TBB5_HUMAN	P07437	R.ISEQFTAMFR.R	40.09	16	0.99147	1	1.42179	3.90625e-14
ISFDEYWTLIGGITGPIAK	S10AG_HUMAN	Q96FQ6	R.ISFDEYWTLIGGITGPIAK.L	67.961	9	0.99236	1	0.990727	2.96893e-18
ISGLIYEETR	H4_HUMAN	P62805	R.ISGLIYEETR.G	52.427	12	0.99308	1	0.963366	7.8125e-14
ISGVGIDQPPYGIFVINQK	DSG1_HUMAN	Q02413	R.ISGVGIDQPPYGIFVINQK.T	15.253	10	0.99302	1	0.29617	8.31138e-20
ISGWTQALPDMVVSHLFGK	NDRG1_HUMAN	Q92597	K.ISGWTQALPDMVVSHLFGK.E	8.883	2	0.9917	1	1.60215	2.2686e-12
ISISTSGGSFR	K2C5_HUMAN	P13647	R.ISISTSGGSFR.N	65.932	71	0.99308	1	1.12681	1.95313e-15
ISITEGIER	DESP_HUMAN	P15924	K.ISITEGIER.G	49.739	138	0.99203	1	0.882593	1.5625e-12
ISLPLPNFSSLNLR	VIME_HUMAN	Q96ML2	R.ISLPLPNFSSLNLR.E	28.112	13	0.99042	1	0.927136	4.20559e-13
ISMPDFDLHLK	AHNK_HUMAN	Q09666	K.ISMPDFDLHLK.G	19.508	36	0.99356	1	1.30611	2.02742e-14
ISMPDFDLHLKGPK	AHNK_HUMAN	Q09666	K.ISMPDFDLHLKGPK.V	19.508	36	0.99311	1	1.32105	4.78652e-16
ISMPDIDLNLTGPK	AHNK_HUMAN	Q09666	K.ISMPDIDLNLTGPK.I	19.508	36	0.99353	1	1.00246	2.96244e-16
ISMPDLDLNLKGPK	AHNK_HUMAN	Q09666	K.ISMPDLDLNLKGPK.M	19.508	36	0.95768	0.838351	1.19916	6.67041e-16
ISMPDVDLHLK	AHNK_HUMAN	Q09666	K.ISMPDVDLHLK.G	19.508	36	0.99187	1	1.26324	5.9082e-15
ISMPDVDLHLKGPK	AHNK_HUMAN	Q09666	K.ISMPDVDLHLKGPK.V	19.508	36	0.99288	1	1.21349	2.88086e-17
ISMPDVDLNLKGPK	AHNK_HUMAN	Q09666	K.ISMPDVDLNLKGPK.L	19.508	36	0.94612	1	1.27459	2.53378e-12
ISMPGFKGEGPEVDVNLPK	AHNK_HUMAN	Q09666	K.ISMPGFKGEGPEVDVNLPK.A	19.508	36	0.96872	1	0.988861	1.36568e-11
ISMQDVDLSLGSPK	AHNK_HUMAN	Q09666	K.ISMQDVDLSLGSPK.L	19.508	36	0.99264	1	0.625424	1.40456e-18
ISMSEVDLNVAAPK	AHNK_HUMAN	Q09666	R.ISMSEVDLNVAAPK.V	19.508	36	0.99044	1	0.0985229	1.56979e-14
ISNRPAFMPSEGK	ACTN2_HUMAN	P35609	R.ISNRPAFMPSEGK.M	5.369	4	0.99306	0.995383	0.76575	1.74746e-12
ISNSLILDVK	SPLC2_HUMAN	Q96DR5	K.ISNSLILDVK.A	49.799	15	0.99265	1	0.979699	1.5625e-13
ISNVFTFAFR	PERL_HUMAN	P22079	R.ISNVFTFAFR.F	32.865	16	0.9931	1	0.975822	1.95313e-14
ISPQIQLSGQTEQTQK	CRNN_HUMAN	Q9UBG3	R.ISPQIQLSGQTEQTQK.A	54.141	18	0.9913	1	-0.138437	3.90625e-20
ISQPVVVVAIVGLYR	GBP6_HUMAN	Q6ZN66	K.ISQPVVVVAIVGLYR.T	35.387	19	0.99349	1	0.862236	4.88281e-20
ISSDLDGHPVPK	TKT_HUMAN	P29401	K.ISSDLDGHPVPK.Q	30.337	13	0.99148	1	1.93353	7.09473e-15
ISSPTETER	S10AB_HUMAN	P31949	K.ISSPTETER.C	45.714	4	0.98333	1	0.616695	3.90625e-13
ISTEEAIR	DESP_HUMAN	P15924	R.ISTEEAIR.K	49.739	138	0.99313	1	1.48439	1.5625e-11
ISTISSVR	DESP_HUMAN	P15924	K.ISTISSVR.N	49.739	138	0.96955	1	1.25492	1.5625e-11
ISTSLPVLDLIDAIQPGSINYDLLK	PLSL_HUMAN	P13796	K.ISTSLPVLDLIDAIQPGSINYDLLK.T	25.359	10	0.99259	1	0.86551	2.98624e-21
ISTSLPVLDLIDAIQPGSINYDLLKTENLNDDEKLNNAK	PLSL_HUMAN	P13796	K.ISTSLPVLDLIDAIQPGSINYDLLKTENLNDDEKLNNAK.Y	25.359	10	0.99112	1	0.226617	5.1795e-17
ISYAQYEK	TGM3_HUMAN	Q08188	K.ISYAQYEK.Y	58.297	45	0.99298	1	1.0315	1.5625e-11
ISYKDAINR	DESP_HUMAN	P15924	K.ISYKDAINR.S	49.739	138	0.98995	1	1.44218	1.5625e-12
ITESEEVVSR	LMNA_HUMAN	P02545	R.ITESEEVVSR.E	24.096	14	0.99283	1	1.29752	1.95313e-14
ITITNDKGR	HS71L_HUMAN	P34931	K.ITITNDKGR.L	17.941	9	0.9924	1	1.01401	1.5625e-12
ITITNDKGR	HSP71_HUMAN	P08107	K.ITITNDKGR.L	43.058	20	0.9924	1	1.01401	1.5625e-12
ITITNDKGR	HSP72_HUMAN	P54652	K.ITITNDKGR.L	17.84	11	0.9924	1	1.01401	1.5625e-12
ITITNDKGR	HSP76_HUMAN	P17066	K.ITITNDKGR.L	12.442	7	0.9924	1	1.01401	1.5625e-12
ITITNDKGR	HSP7C_HUMAN	P11142	K.ITITNDKGR.L	39.783	24	0.9924	1	1.01401	1.5625e-12
ITITNDQNR	GRP78_HUMAN	P11021	K.ITITNDQNR.L	25.994	13	0.9865	1	0.877093	1.64063e-12
ITLDNAYMEK	KPYM_HUMAN	Q9BWB5	K.ITLDNAYMEK.C	49.153	22	0.99329	1	1.24113	7.8125e-14
ITLPVDFVTADKFDENAK	PGK1_HUMAN	P00558	K.ITLPVDFVTADKFDENAK.T	42.926	14	0.99294	1	1.25745	4.91333e-23
ITMQNLNDR	K1C13_HUMAN	P13646	K.ITMQNLNDR.L	69.869	59	0.99244	0.520925	0.437411	1.5625e-12
ITMQNLNDR	K1C15_HUMAN	P19012	K.ITMQNLNDR.L	27.412	19	0.99244	0.520925	0.437411	1.5625e-12
ITMQNLNDRLASYLEK	K1C13_HUMAN	P13646	K.ITMQNLNDRLASYLEK.V	69.869	59	0.99289	1	1.55798	6.68719e-18
ITNLTQQLEQASIVK	DESP_HUMAN	P15924	K.ITNLTQQLEQASIVK.K	49.739	138	0.99386	1	0.767685	1.42779e-17
ITNLTQQLEQASIVKK	DESP_HUMAN	P15924	K.ITNLTQQLEQASIVKK.R	49.739	138	0.99223	1	0.66193	3.88833e-16
ITPNLAEFAFSLYR	A1AT_HUMAN	Q86U18	K.ITPNLAEFAFSLYR.Q	39.952	14	0.99232	1	0.850836	4.88281e-19
ITPSYVAFTPEGER	GRP78_HUMAN	P11021	R.ITPSYVAFTPEGER.L	25.994	13	0.99119	1	0.418771	1.0985e-15
ITWLYDNTTGK	TGM3_HUMAN	Q08188	R.ITWLYDNTTGK.Q	58.297	45	0.9927	1	0.740319	1.95313e-15
ITWLYDNTTGKQWK	TGM3_HUMAN	Q08188	R.ITWLYDNTTGKQWK.N	58.297	45	0.99264	1	1.63553	2.09238e-17
IVDDWANDGWGLKK	CALX_HUMAN	P27824	R.IVDDWANDGWGLKK.A	15.709	5	0.99274	1	1.5955	1.01978e-15
IVENIQVFDFK	AK1BA_HUMAN	O60218	R.IVENIQVFDFK.L	24.367	6	0.99276	1	1.19129	3.90625e-15
IVEPYIAWGYPNLK	RL7_HUMAN	P18124	R.IVEPYIAWGYPNLK.S	14.919	3	0.99389	1	0.497027	9.46227e-16
IVLQIDNAR	K1C18_HUMAN	P05783	R.IVLQIDNAR.L	7.442	2	0.99198	1	1.41284	3.125e-12
IVLQIDNAR	K1C19_HUMAN	Q9P1Y4	R.IVLQIDNAR.L	40	16	0.99198	1	1.41284	3.125e-12
IVLTGWRPGSGFTNTMR	KPYM_HUMAN	Q9BWB5	V.IVLTGWRPGSGFTNTMR.V	49.153	22	0.70747	1	1.40435	4.63596e-13
IVSGKDYNVTANSK	LDHA_HUMAN	P00338	K.IVSGKDYNVTANSK.L	29.217	10	0.9907	1	1.63009	2.44141e-19
IVSQLLTLMDGLK	TERA_HUMAN	P55072	R.IVSQLLTLMDGLK.Q	12.655	8	0.99262	1	1.1151	7.8125e-17
IVTMDSNFVPVNDKYSMVELQDPNSNR	A2ML1_HUMAN	A8K2U0	R.IVTMDSNFVPVNDKYSMVELQDPNSNR.I	27.854	29	0.99293	1	0.351635	2.12523e-26
IWALEEENAK	PEPL_HUMAN	O60437	K.IWALEEENAK.V	32.517	52	0.99251	1	1.51532	4.72913e-12
IWHHTFYN	ACTBM_HUMAN	Q9BYX7	K.IWHHTFYN.E	24	15	0.94774	1	0.952249	8.20313e-12
IWHHTFYN	ACTB_HUMAN	Q96HG5	K.IWHHTFYN.E	80.8	48	0.94774	1	0.952249	8.20313e-12
IWHHTFYN	ACTC_HUMAN	P68032	K.IWHHTFYN.E	48.806	32	0.94774	1	0.952249	8.20313e-12
IWHHTFYN	ACTG_HUMAN	P63261	K.IWHHTFYN.E	80.8	48	0.94774	1	0.952249	8.20313e-12
IWHHTFYN	ACTS_HUMAN	P68133	K.IWHHTFYN.E	45.093	30	0.94774	1	0.952249	8.20313e-12
IWHHTFYN	POTEE_HUMAN	Q6S8J3	K.IWHHTFYN.E	12.186	18	0.94774	1	0.952249	8.20313e-12
IWHHTFYN	POTEF_HUMAN	A5A3E0	K.IWHHTFYN.E	10.512	17	0.94774	1	0.952249	8.20313e-12
IWHHTFYNELR	ACTBM_HUMAN	Q9BYX7	K.IWHHTFYNELR.V	24	15	0.99267	1	1.48197	1.95313e-15
IWHHTFYNELR	ACTB_HUMAN	Q96HG5	K.IWHHTFYNELR.V	80.8	48	0.99267	1	1.48197	1.95313e-15
IWHHTFYNELR	ACTC_HUMAN	P68032	K.IWHHTFYNELR.V	48.806	32	0.99267	1	1.48197	1.95313e-15
IWHHTFYNELR	ACTG_HUMAN	P63261	K.IWHHTFYNELR.V	80.8	48	0.99267	1	1.48197	1.95313e-15
IWHHTFYNELR	ACTS_HUMAN	P68133	K.IWHHTFYNELR.V	45.093	30	0.99267	1	1.48197	1.95313e-15
IWHHTFYNELR	POTEE_HUMAN	Q6S8J3	K.IWHHTFYNELR.V	12.186	18	0.99267	1	1.48197	1.95313e-15
IWHHTFYNELR	POTEF_HUMAN	A5A3E0	K.IWHHTFYNELR.V	10.512	17	0.99267	1	1.48197	1.95313e-15
IYDDDFFQNLDGVANALDNVDAR	UBA1_HUMAN	P22314	R.IYDDDFFQNLDGVANALDNVDAR.M	4.726	3	0.9929	1	1.36666	5.7426e-19
IYHLQLFEELRR	KPYM_HUMAN	Q9BWB5	A.IYHLQLFEELRR.L	49.153	22	0.99172	1	1.12038	1.25072e-13
IYIDSNNNPER	CLH1_HUMAN	Q00610	K.IYIDSNNNPER.F	10.627	13	0.9931	1	0.756584	2.83691e-15
IYNGTLVHEVWK	TGM3_HUMAN	Q08188	I.IYNGTLVHEVWK.D	58.297	45	0.99293	1	1.03213	1.37207e-15
IYTSPTWSAFVTDSSWSAR	LG3BP_HUMAN	Q08380	R.IYTSPTWSAFVTDSSWSAR.K	23.077	11	0.99368	1	0.635952	1.4935e-25
IYVDDGLISLQVK	KPYM_HUMAN	Q9BWB5	K.IYVDDGLISLQVK.Q	49.153	22	0.99284	1	0.540222	1.36719e-16
IYVSDDGK	AMY1_HUMAN	P04745	K.IYVSDDGK.A	65.362	60	0.99309	1	0.792246	7.8125e-12
IYVSDDGK	AMY2B_HUMAN	P19961	K.IYVSDDGK.A	53.816	42	0.99309	1	0.792246	7.8125e-12
IYVSDDGK	AMYP_HUMAN	P04746	K.IYVSDDGK.A	45.597	37	0.99309	1	0.792246	7.8125e-12
IYVSDDGKAHFSISNSAEDPFIAIHAESK	AMY1_HUMAN	P04745	K.IYVSDDGKAHFSISNSAEDPFIAIHAESK.L	65.362	60	0.99293	1	0.304494	1.44888e-29
IYVSDDGKAHFSISNSAEDPFIAIHAESK	AMY2B_HUMAN	P19961	K.IYVSDDGKAHFSISNSAEDPFIAIHAESK.L	53.816	42	0.99293	1	0.304494	1.44888e-29
IYVSDDGKAHFSISNSAEDPFIAIHAESK	AMYP_HUMAN	P04746	K.IYVSDDGKAHFSISNSAEDPFIAIHAESK.L	45.597	37	0.99293	1	0.304494	1.44888e-29
IYYGTEAQIGER	TGM1_HUMAN	P22735	R.IYYGTEAQIGER.T	26.683	16	0.99215	1	0.083007	1.95313e-16
KAADKLIQNLDANHDGR	S10AG_HUMAN	Q96FQ6	R.KAADKLIQNLDANHDGR.I	67.961	9	0.99279	1	1.11306	5.88095e-17
KAAYLQETGKPLDETLKK	ANXA1_HUMAN	P04083	I.KAAYLQETGKPLDETLKK.A	67.052	42	0.99375	1	0.814716	2.17299e-18
KAGQAVDDFIEK	6PGD_HUMAN	P52209	V.KAGQAVDDFIEK.L	41.615	17	0.99186	1	0.341448	1.95313e-15
KAGTELVNFLSYFV	APOA2_HUMAN	P02652	K.KAGTELVNFLSYFV.E	25	2	0.99301	1	1.18784	2.88694e-11
KAGTQIENIDEDFRDGLK	ACTN4_HUMAN	O43707	R.KAGTQIENIDEDFRDGLK.L	42.371	27	0.99317	1	0.777288	6.82485e-18
KALTGHLEEVVLALLK	ANXA1_HUMAN	P04083	K.KALTGHLEEVVLALLK.T	67.052	42	0.9929	1	1.22143	4.46778e-19
KANLQIDQINTDLNLER	MYH9_HUMAN	P35579	K.KANLQIDQINTDLNLER.S	15.357	24	0.96454	1	0.705189	2.10551e-11
KAPSDLYQIILK	CAN1_HUMAN	P07384	R.KAPSDLYQIILK.A	16.807	9	0.99307	1	0.650018	1.3892e-13
KAQYEDIAQK	K2C1_HUMAN	P04264	V.KAQYEDIAQK.S	66.77	58	0.99291	1	0.53362	5.1732e-12
KAQYEEIANR	K2C5_HUMAN	P13647	V.KAQYEEIANR.S	65.932	71	0.99272	1	1.33531	7.8125e-13
KAQYEEIAQR	K22E_HUMAN	P35908	V.KAQYEEIAQR.S	40.845	30	0.99302	1	1.35555	1.5625e-12
KAQYEEIAQR	K2C6A_HUMAN	P02538	V.KAQYEEIAQR.S	70.035	77	0.99302	1	1.35555	1.5625e-12
KAQYEEIAQR	K2C6B_HUMAN	P04259	V.KAQYEEIAQR.S	68.44	73	0.99302	1	1.35555	1.5625e-12
KAQYEEIAQR	K2C6C_HUMAN	P48668	V.KAQYEEIAQR.S	67.553	75	0.99302	1	1.35555	1.5625e-12
KASGPPVSELITK	H12_HUMAN	P16403	R.KASGPPVSELITK.A	26.291	6	0.99323	1	0.838767	1.03223e-15
KASGPPVSELITK	H13_HUMAN	P16402	R.KASGPPVSELITK.A	25.339	6	0.99323	1	0.838767	1.03223e-15
KASGPPVSELITK	H14_HUMAN	P10412	R.KASGPPVSELITK.A	25.571	6	0.99323	1	0.838767	1.03223e-15
KAVETAAAHGSKPNVYANR	TGM1_HUMAN	P22735	R.KAVETAAAHGSKPNVYANR.G	26.683	16	0.99372	1	1.28737	6.63285e-23
KAYGQALAK	TKT_HUMAN	P29401	R.KAYGQALAK.L	30.337	13	0.99167	1	0.547262	1.5625e-12
KDAEEWFFTK	K1C14_HUMAN	P02533	R.KDAEEWFFTK.T	60.593	45	0.99369	1	0.997527	1.95313e-14
KDAEEWFFTKTEELNR	K1C14_HUMAN	P02533	R.KDAEEWFFTKTEELNR.E	60.593	45	0.98419	1	2.03842	1.15979e-18
KDDPVTNLNNAFEVAEK	ACTN4_HUMAN	O43707	R.KDDPVTNLNNAFEVAEK.Y	42.371	27	0.99253	1	1.40389	1.32752e-22
KDKNEDKKIDFSEFLSLLGDIATDYHK	S10A7_HUMAN	P31151	K.KDKNEDKKIDFSEFLSLLGDIATDYHK.Q	49.505	9	0.99301	1	1.02566	3.14308e-19
KDLQNFLKK	S10A9_HUMAN	P06702	R.KDLQNFLKK.E	90.351	13	0.98943	1	1.0885	6.25e-12
KDVDAAYLNKVELEAK	K2C4_HUMAN	P19013	K.KDVDAAYLNKVELEAK.V	74.532	75	0.99393	1	1.16114	2.44141e-21
KDVDAAYMNKVELQAK	K2C6A_HUMAN	P02538	K.KDVDAAYMNKVELQAK.A	70.035	77	0.99381	1	0.713035	2.81373e-21
KDVDAAYMNKVELQAK	K2C6B_HUMAN	P04259	K.KDVDAAYMNKVELQAK.A	68.44	73	0.99381	1	0.713035	2.81373e-21
KDVDAAYMNKVELQAK	K2C6C_HUMAN	P48668	K.KDVDAAYMNKVELQAK.A	67.553	75	0.99381	1	0.713035	2.81373e-21
KDVDAAYMNKVELQAK	K2C72_HUMAN	Q14CN4	K.KDVDAAYMNKVELQAK.V	6.458	7	0.99381	1	0.713035	2.81373e-21
KDVDGAYMTK	K2C1_HUMAN	P04264	K.KDVDGAYMTK.V	66.77	58	0.99369	1	0.55764	8.44727e-14
KEDLVFIFWAPESAPLK	COF1_HUMAN	P23528	K.KEDLVFIFWAPESAPLK.S	50	7	0.99168	1	1.64651	3.42948e-18
KEDLVFIFWAPESAPLK	COF2_HUMAN	Q9Y281	K.KEDLVFIFWAPESAPLK.S	18.675	4	0.99168	1	1.64651	3.42948e-18
KEGGLGPLNIPLLADVTR	PRDX2_HUMAN	P32119	R.KEGGLGPLNIPLLADVTR.R	25.253	5	0.99255	1	1.21178	6.95984e-21
KFDLDQLITHVLPFKK	ADH7_HUMAN	P40394	K.KFDLDQLITHVLPFKK.I	7.513	2	0.97605	1	1.36881	6.95931e-14
KFDLGQDVIDFTGHALALYR	GDIA_HUMAN	P31150	R.KFDLGQDVIDFTGHALALYR.T	10.962	4	0.99308	1	1.6946	9.33344e-23
KFDLGQDVIDFTGHALALYR	GDIB_HUMAN	P50395	K.KFDLGQDVIDFTGHALALYR.T	19.101	7	0.99308	1	1.6946	9.33344e-23
KFDQLLAEEK	MYH10_HUMAN	P35580	K.KFDQLLAEEK.S	1.063	2	0.99306	1	0.644286	1.64258e-13
KFDQLLAEEK	MYH11_HUMAN	P35749	R.KFDQLLAEEK.N	1.318	2	0.99306	1	0.644286	1.64258e-13
KFDQLLAEEK	MYH14_HUMAN	Q9H882	R.KFDQLLAEEK.A	1.303	2	0.99306	1	0.644286	1.64258e-13
KFDQLLAEEK	MYH9_HUMAN	P35579	K.KFDQLLAEEK.T	15.357	24	0.99306	1	0.644286	1.64258e-13
KFDVNTSAVQVLIEHIGNLDR	CLH1_HUMAN	Q00610	R.KFDVNTSAVQVLIEHIGNLDR.A	10.627	13	0.99323	1	1.57144	2.12368e-21
KFSIEEALQSGR	PEPL_HUMAN	O60437	K.KFSIEEALQSGR.L	32.517	52	0.99388	1	1.51975	8.39844e-16
KGGETSEMYLIQPDSSVKPYR	FIBB_HUMAN	P02675	R.KGGETSEMYLIQPDSSVKPYR.V	26.477	10	0.99309	1	1.11892	5.78397e-19
KGGSFQLNELQGLK	TRFL_HUMAN	Q8TCD2	K.KGGSFQLNELQGLK.S	34.085	34	0.99228	1	0.849047	2.14404e-17
KGNYAERV	H2A1C_HUMAN	Q93077	R.KGNYAERV.G	63.077	15	0.98027	1	0.52048	7.8125e-12
KGNYAERV	H2A1H_HUMAN	Q96KK5	R.KGNYAERV.G	64.062	15	0.98027	1	0.52048	7.8125e-12
KGNYAERV	H2A1J_HUMAN	Q99878	R.KGNYAERV.G	64.062	15	0.98027	1	0.52048	7.8125e-12
KGNYAERV	H2A1_HUMAN	P0C0S8	R.KGNYAERV.G	63.077	15	0.98027	1	0.52048	7.8125e-12
KGNYAERV	H2A2A_HUMAN	Q6FI13	R.KGNYAERV.G	63.077	16	0.98027	1	0.52048	7.8125e-12
KGNYAERV	H2A2B_HUMAN	Q8IUE6	R.KGNYAERV.G	49.231	12	0.98027	1	0.52048	7.8125e-12
KGNYAERV	H2A2C_HUMAN	Q16777	R.KGNYAERV.G	63.566	16	0.98027	1	0.52048	7.8125e-12
KGNYAERV	H2AJ_HUMAN	Q9BTM1	R.KGNYAERV.G	63.566	15	0.98027	1	0.52048	7.8125e-12
KGTDVNVFNTILTTR	ANXA1_HUMAN	P04083	R.KGTDVNVFNTILTTR.S	67.052	42	0.99188	0.999545	1.20573	2.44141e-20
KGTNYLADVFEKK	S10A7_HUMAN	P31151	K.KGTNYLADVFEKK.D	49.505	9	0.99327	1	1.63547	1.44484e-15
KGTVVAEKDRPHEGTRPVR	COR1A_HUMAN	P31146	R.KGTVVAEKDRPHEGTRPVR.A	31.67	9	0.99386	1	0.76456	1.06826e-18
KGVDEATIIDILTK	ANXA1_HUMAN	P04083	V.KGVDEATIIDILTK.R	67.052	42	0.99262	1	1.48938	1.95313e-17
KGVDEATIIDILTKR	ANXA1_HUMAN	P04083	V.KGVDEATIIDILTKR.N	67.052	42	0.99289	1	1.04389	2.05164e-16
KGVNLPGAAVDLPAVSEKDIQDLK	KPYM_HUMAN	Q9BWB5	K.KGVNLPGAAVDLPAVSEKDIQDLK.F	49.153	22	0.99362	1	1.04133	1.49548e-21
KHLEINPDHPIVETLR	HS90B_HUMAN	P08238	K.KHLEINPDHPIVETLR.Q	24.171	15	0.99269	1	1.53065	3.06268e-14
KHLEINPDHSIIETLR	HS90A_HUMAN	P07900	K.KHLEINPDHSIIETLR.Q	19.945	13	0.99328	1	1.43754	5.95571e-14
KIDFSEFLSLLGDIATDYHK	S10A7_HUMAN	P31151	K.KIDFSEFLSLLGDIATDYHK.Q	49.505	9	0.99312	1	0.911096	2.37974e-24
KIPNPDFFEDLEPFR	CALX_HUMAN	P27824	R.KIPNPDFFEDLEPFR.M	15.709	5	0.99261	1	1.45572	2.48587e-14
KIVGAMVQIITYR	PERM_HUMAN	P05164	R.KIVGAMVQIITYR.D	29.396	23	0.99203	1	1.11432	1.60156e-15
KIWALEEENAK	PEPL_HUMAN	O60437	R.KIWALEEENAK.V	32.517	52	0.99293	1	1.13959	3.90625e-15
KIYVSDDGK	AMY1_HUMAN	P04745	I.KIYVSDDGK.A	65.362	60	0.99192	1	0.853815	7.8125e-12
KIYVSDDGK	AMY2B_HUMAN	P19961	I.KIYVSDDGK.A	53.816	42	0.99192	1	0.853815	7.8125e-12
[truncated: 2,834 more rows]

## Sheet: DRC
Peptide	Protein	UniProt	PeptideEx	Percent_Coverage	PeptideCount	STAC_Score	Uniqueness_Probability	MassErrorPPM	MSGF_SpecProb
AADAEAEVASLNR	TPM3_HUMAN	P06753	K.AADAEAEVASLNR.R	26.056	10	0.99372	1	0.173756	6.73545e-14
AADDTWEPFASGK	TTHY_HUMAN	P02766	K.AADDTWEPFASGK.T	69.388	10	0.99555	1	0.46096	1.46484e-18
AADKLGSTQIV	LPLC1_HUMAN	Q9H4V6	K.AADKLGSTQIV.K	77.686	66	0.98836	0.984645	1.04738	8.49121e-12
AADKLGSTQIVK	LPLC1_HUMAN	Q9H4V6	K.AADKLGSTQIVK.I	77.686	66	0.99403	1	1.66334	3.90625e-16
AADKLIQNLDANHDGR	S10AG_HUMAN	Q96FQ6	K.AADKLIQNLDANHDGR.I	67.961	9	0.99545	1	0.492435	3.58598e-17
AADTDGDGQVNYEEFVR	CALL3_HUMAN	P27482	R.AADTDGDGQVNYEEFVR.V	57.047	9	0.99527	1	0.399297	6.3324e-22
AADYYSQQMAQR	GBP6_HUMAN	Q6ZN66	R.AADYYSQQMAQR.V	54.502	36	0.99416	1	0.138821	1.44809e-14
AAEDAVYELQSK	EVPL_HUMAN	Q92817	R.AAEDAVYELQSK.R	44.761	77	0.99377	1	0.48479	9.76563e-17
AAEGLAHR	FAM25_HUMAN	Q5VTM1	L.AAEGLAHR.T	74.157	9	0.82655	1	1.16136	7.8125e-11
AAENDFVVLK	K2C4_HUMAN	P19013	T.AAENDFVVLK.K	89.888	254	0.99336	1	0.756486	1.95313e-13
AAENDFVVLKK	K2C4_HUMAN	P19013	T.AAENDFVVLKK.D	89.888	254	0.97845	1	0.463301	3.90625e-14
AAEVYGTER	TRFL_HUMAN	Q8TCD2	V.AAEVYGTER.Q	43.099	62	0.99509	1	0.71274	1.95313e-12
AAFDDAIAELDTLSEESYK	1433E_HUMAN	P62258	K.AAFDDAIAELDTLSEESYK.D	35.686	14	0.9942	1	0.706914	2.43917e-19
AAFDDAIAELDTLSEESYKDSTLI	1433E_HUMAN	P62258	K.AAFDDAIAELDTLSEESYKDSTLI.M	35.686	14	0.98595	1	0.631595	7.33491e-19
AAFDDAIAELDTLSEESYKDSTLIMQLLR	1433E_HUMAN	P62258	K.AAFDDAIAELDTLSEESYKDSTLIMQLLR.D	35.686	14	0.99393	1	0.745671	4.71208e-23
AAFNSGK	G3P_HUMAN	P04406	R.AAFNSGK.V	91.045	66	0.48033	0.642792	2.0205	7.8125e-11
AAFNSGKVDIV	G3P_HUMAN	P04406	R.AAFNSGKVDIV.A	91.045	66	0.995	1	0.80047	2.15332e-15
AAFNSGKVDIVAINDPFIDLNYMVYMFQYDSTHGK	G3P_HUMAN	P04406	R.AAFNSGKVDIVAINDPFIDLNYMVYMFQYDSTHGK.F	91.045	66	0.98173	1	-0.0876499	3.63244e-27
AAFNSGKVDIVAINDPFIDLNYMVYMFQYDSTHGKFHGTVK	G3P_HUMAN	P04406	R.AAFNSGKVDIVAINDPFIDLNYMVYMFQYDSTHGKFHGTVK.A	91.045	66	0.99093	1	0.521017	3.95298e-15
AAGGYDVEKNNSR	H15_HUMAN	P16401	L.AAGGYDVEKNNSR.I	27.434	14	0.9911	1	-0.00782811	1.0238e-13
AAGSRDVSLAKADAAPDEK	PIGR_HUMAN	P01833	K.AAGSRDVSLAKADAAPDEK.V	34.817	59	0.98418	1	0.782495	4.99185e-15
AAGVGEFEAGISK	EF1A1_HUMAN	P68104	V.AAGVGEFEAGISK.N	46.537	29	0.99394	1	0.852085	2.44141e-17
AAGVGEFEAGISK	EF1A2_HUMAN	Q05639	V.AAGVGEFEAGISK.N	21.814	14	0.99394	1	0.852085	2.44141e-17
AAGVGEFEAGISK	EF1A3_HUMAN	Q5VTE0	V.AAGVGEFEAGISK.N	46.537	29	0.99394	1	0.852085	2.44141e-17
AAHLPAEFTPAVHASLDK	HBA_HUMAN	P69905	L.AAHLPAEFTPAVHASLDK.F	92.958	74	0.97909	1	0.479357	1.61585e-17
AAHLPAEFTPAVHASLDKFLASVSTVLTSK	HBA_HUMAN	P69905	L.AAHLPAEFTPAVHASLDKFLASVSTVLTSK.Y	92.958	74	0.98995	1	0.306725	7.40734e-28
AAIAQELNELDYYDSHNVNTR	ACTN4_HUMAN	O43707	I.AAIAQELNELDYYDSHNVNTR.C	65.642	52	0.97977	1	0.130465	2.02258e-12
AAIFDTENLEK	DESP_HUMAN	P15924	I.AAIFDTENLEK.I	60.885	220	0.99101	1	0.862663	1.44531e-13
AALDDGSALGR	TYPH_HUMAN	P19971	A.AALDDGSALGR.F	17.012	6	0.97532	1	-0.572225	3.90625e-14
AALEDTLAETEAR	K1C19_HUMAN	Q9P1Y4	K.AALEDTLAETEAR.F	68.75	43	0.99384	1	1.24766	4.88281e-18
AALQQAKEELAR	K2C4_HUMAN	P19013	E.AALQQAKEELAR.M	89.888	254	0.99321	1	0.600049	5.59639e-13
AALSYVSEIGK	BPIL1_HUMAN	Q8N4F0	K.AALSYVSEIGK.A	53.275	29	0.99506	1	0.611381	1.95313e-15
AALSYVSEIGKAPLQR	BPIL1_HUMAN	Q8N4F0	K.AALSYVSEIGKAPLQR.A	53.275	29	0.99426	1	0.959257	2.60112e-20
AAMIVNQLSK	PLAK_HUMAN	P14923	K.AAMIVNQLSK.K	52.081	39	0.99435	1	1.38349	7.8125e-14
AAMIVNQLSKK	PLAK_HUMAN	P14923	K.AAMIVNQLSKK.E	52.081	39	0.91467	1	0.898571	7.14282e-14
AAMKGLGTDEDTLIEILASR	ANXA1_HUMAN	P04083	R.AAMKGLGTDEDTLIEILASR.T	84.393	98	0.99427	0.825127	0.837055	2.35161e-22
AANEADAVTLDAGLVYDAYLAPNNLKPVVAEFYGSK	TRFE_HUMAN	P02787	I.AANEADAVTLDAGLVYDAYLAPNNLKPVVAEFYGSK.E	38.109	46	0.80687	1	0.632202	8.61311e-18
AAPEASGTPSSDAVSR	COR1A_HUMAN	P31146	R.AAPEASGTPSSDAVSR.L	40.564	18	0.99501	1	0.0627955	1.63208e-18
AAPFNNWMEGAMEDLQDTFIVHTIEEIQGLTTAHEQFK	ACTN1_HUMAN	P12814	R.AAPFNNWMEGAMEDLQDTFIVHTIEEIQGLTTAHEQFK.A	38.901	27	0.99364	1	0.715769	8.62618e-21
AAPFNNWMESAMEDLQDMFIVHTIEEIEGLISAHDQFK	ACTN4_HUMAN	O43707	R.AAPFNNWMESAMEDLQDMFIVHTIEEIEGLISAHDQFK.S	65.642	52	0.98421	1	0.800176	1.77037e-23
AAPGVDLTQLLNNMR	K1C10_HUMAN	P13645	N.AAPGVDLTQLLNNMR.S	63.185	55	0.98256	1	-0.1672	7.71485e-17
AAPPAEKAPVKKKAAK	H12_HUMAN	P16403	A.AAPPAEKAPVKKKAAK.K	37.089	14	0.70517	1	1.10382	1.29796e-11
AAPSVFIFPPSDEQLK	IGKC_HUMAN	P01834	V.AAPSVFIFPPSDEQLK.S	76.415	21	0.99395	1	0.0514068	1.26186e-11
AAPSVTLFPPSSEELQANK	LAC6_HUMAN	P0CF74	K.AAPSVTLFPPSSEELQANK.A	50.943	12	0.99404	1	0.18282	9.8329e-17
AAPSVTLFPPSSEELQANK	LAC7_HUMAN	A0M8Q6	K.AAPSVTLFPPSSEELQANK.A	59.434	13	0.99404	1	0.18282	9.8329e-17
AAPSVTLFPPSSEELQANKATLV	LAC6_HUMAN	P0CF74	K.AAPSVTLFPPSSEELQANKATLV.C	50.943	12	0.99401	1	1.18329	2.10044e-12
AAPSVTLFPPSSEELQANKATLV	LAC7_HUMAN	A0M8Q6	K.AAPSVTLFPPSSEELQANKATLV.C	59.434	13	0.99401	1	1.18329	2.10044e-12
AAQEEYVKR	ALDOA_HUMAN	P04075	K.AAQEEYVKR.A	57.143	22	0.9901	1	-0.4689	7.8125e-13
AAQKADVLTTGAGNPVGDKLNVITVGPR	CATA_HUMAN	P04040	R.AAQKADVLTTGAGNPVGDKLNVITVGPR.G	33.966	14	0.99212	1	0.465977	2.52665e-16
AAQVTIQSSGTFSSK	A2MG_HUMAN	P01023	K.AAQVTIQSSGTFSSK.F	51.493	60	0.99168	1	0.195001	2.9173e-16
AASSLLANLWQYNK	PKP3_HUMAN	Q9Y446	R.AASSLLANLWQYNK.L	21.205	15	0.78849	1	0.0226262	2.78618e-12
AATIENAQPILQIDNAR	K1C16_HUMAN	P08779	I.AATIENAQPILQIDNAR.L	82.452	101	0.9922	1	0.612857	7.88696e-16
AATSDLEHYDK	NUCB2_HUMAN	P80303	K.AATSDLEHYDK.T	45.476	20	0.98154	1	0.884858	9.76563e-16
AATSSMGLETEEQEPSIIGK	TGM3_HUMAN	Q08188	F.AATSSMGLETEEQEPSIIGK.L	78.355	85	0.98844	1	0.166732	1.77614e-18
AATYHVDR	SPB3_HUMAN	Q8IXI3	K.AATYHVDR.S	73.59	37	0.98897	1	-0.352675	3.90625e-12
AATYHVDR	SPB4_HUMAN	P48594	K.AATYHVDR.S	44.103	24	0.98897	1	-0.352675	3.90625e-12
AAVAAVLSPEEFMV	LPLC1_HUMAN	Q9H4V6	K.AAVAAVLSPEEFMV.L	77.686	66	0.98076	1	-0.0115863	1.1013e-11
AAVAAVLSPEEFMVLLDSVLPESAHR	LPLC1_HUMAN	Q9H4V6	K.AAVAAVLSPEEFMVLLDSVLPESAHR.L	77.686	66	0.99476	1	0.866119	4.56372e-25
AAVLEYLTAEILELAGNAAR	H2A1B_HUMAN	P04908	L.AAVLEYLTAEILELAGNAAR.D	62.308	22	0.99462	1	1.63728	4.48773e-19
AAVLEYLTAEILELAGNAAR	H2A1C_HUMAN	Q93077	L.AAVLEYLTAEILELAGNAAR.D	67.692	23	0.99462	1	1.63728	4.48773e-19
AAVLEYLTAEILELAGNAAR	H2A1D_HUMAN	P20671	L.AAVLEYLTAEILELAGNAAR.D	62.308	27	0.99462	1	1.63728	4.48773e-19
AAVLEYLTAEILELAGNAAR	H2A1H_HUMAN	Q96KK5	L.AAVLEYLTAEILELAGNAAR.D	68.75	28	0.99462	1	1.63728	4.48773e-19
AAVLEYLTAEILELAGNAAR	H2A1J_HUMAN	Q99878	L.AAVLEYLTAEILELAGNAAR.D	68.75	28	0.99462	1	1.63728	4.48773e-19
AAVLEYLTAEILELAGNAAR	H2A1_HUMAN	P0C0S8	L.AAVLEYLTAEILELAGNAAR.D	67.692	28	0.99462	1	1.63728	4.48773e-19
AAVLEYLTAEILELAGNAAR	H2A2A_HUMAN	Q6FI13	M.AAVLEYLTAEILELAGNAAR.D	67.692	29	0.99462	1	1.63728	4.48773e-19
AAVLEYLTAEILELAGNAAR	H2A2B_HUMAN	Q8IUE6	L.AAVLEYLTAEILELAGNAAR.D	62.308	19	0.99462	1	1.63728	4.48773e-19
AAVLEYLTAEILELAGNAAR	H2A2C_HUMAN	Q16777	M.AAVLEYLTAEILELAGNAAR.D	68.217	29	0.99462	1	1.63728	4.48773e-19
AAVLEYLTAEILELAGNAAR	H2A3_HUMAN	Q7L7L0	L.AAVLEYLTAEILELAGNAAR.D	62.308	22	0.99462	1	1.63728	4.48773e-19
AAVLEYLTAEILELAGNAAR	H2AJ_HUMAN	Q9BTM1	L.AAVLEYLTAEILELAGNAAR.D	68.217	28	0.99462	1	1.63728	4.48773e-19
AAVLEYLTAEILELAGNAAR	H2AX_HUMAN	P16104	L.AAVLEYLTAEILELAGNAAR.D	56.643	20	0.99462	1	1.63728	4.48773e-19
AAVLEYLTAEILELAGNAAR	H2AY_HUMAN	O75367	M.AAVLEYLTAEILELAGNAAR.D	11.559	14	0.99462	1	1.63728	4.48773e-19
AAVLSPEEFMVLLDSVLPESAHR	LPLC1_HUMAN	Q9H4V6	V.AAVLSPEEFMVLLDSVLPESAHR.L	77.686	66	0.98622	1	0.0183717	3.7934e-18
AAVLWEQK	ADH7_HUMAN	P40394	K.AAVLWEQK.Q	16.839	5	0.74319	1	0.289132	1.79883e-11
AAVPSGASTGIYEALELR	ENOA_HUMAN	Q6GMP2	R.AAVPSGASTGIYEALELR.D	73.272	46	0.99467	1	1.10591	3.08991e-22
AAVVDVIR	PIP_HUMAN	P12273	I.AAVVDVIR.E	56.849	21	0.98844	1	0.536184	7.8125e-11
AAVYHHFISDGVR	CO3_HUMAN	P01024	K.AAVYHHFISDGVR.K	56.705	82	0.99067	1	0.303045	8.52412e-16
AAVYHHFISDGVRK	CO3_HUMAN	P01024	K.AAVYHHFISDGVRK.S	56.705	82	0.99135	1	1.19419	1.6663e-16
AAWGKVGAHAGEYGAEALER	HBA_HUMAN	P69905	K.AAWGKVGAHAGEYGAEALER.M	92.958	74	0.99109	1	0.588933	5.62174e-21
AAYEAELGDAR	LMNA_HUMAN	P02545	K.AAYEAELGDAR.K	51.506	35	0.99051	0.657033	-0.0492898	6.25977e-15
AAYEAELGDARK	LMNA_HUMAN	P02545	K.AAYEAELGDARK.T	51.506	35	0.79284	1	1.03053	1.03209e-12
AAYEDFNVQLR	MUC5B_HUMAN	Q7M4S5	R.AAYEDFNVQLR.R	8.712	58	0.99545	1	0.359494	1.95313e-15
AAYEDFNVQLRR	MUC5B_HUMAN	Q7M4S5	R.AAYEDFNVQLRR.G	8.712	58	0.97797	1	1.02131	1.79381e-12
AAYEHFHR	PEPL_HUMAN	O60437	K.AAYEHFHR.G	64.18	115	0.98239	1	0.690447	7.8125e-12
AAYFGIYDTAK	ADT2_HUMAN	P05141	R.AAYFGIYDTAK.G	24.161	7	0.99322	0.930178	0.862635	3.80149e-12
AAYLNKVELEAK	K2C4_HUMAN	P19013	D.AAYLNKVELEAK.V	89.888	254	0.99191	1	0.321575	9.59595e-15
AAYLQETGKPLDETLK	ANXA1_HUMAN	P04083	K.AAYLQETGKPLDETLK.K	84.393	98	0.99536	1	1.04875	8.46988e-18
AAYLQETGKPLDETLKK	ANXA1_HUMAN	P04083	K.AAYLQETGKPLDETLKK.A	84.393	98	0.99523	1	0.74374	1.60714e-18
AAYLQETGKPLDETLKKALTGHLEEVVLALLK	ANXA1_HUMAN	P04083	K.AAYLQETGKPLDETLKKALTGHLEEVVLALLK.T	84.393	98	0.99359	1	0.288344	1.98896e-21
AAYLQETGKPLDETLKKALTGHLEEVVLALLKTPAQFDADELR	ANXA1_HUMAN	P04083	K.AAYLQETGKPLDETLKKALTGHLEEVVLALLKTPAQFDADELR.A	84.393	98	0.99198	1	0.248408	1.21833e-17
AAYMNKVELQAK	K2C6A_HUMAN	P02538	D.AAYMNKVELQAK.A	91.844	201	0.98944	1	0.695824	2.45239e-15
AAYMNKVELQAK	K2C6B_HUMAN	P04259	D.AAYMNKVELQAK.A	91.844	180	0.98944	1	0.695824	2.45239e-15
AAYMNKVELQAK	K2C6C_HUMAN	P48668	D.AAYMNKVELQAK.A	82.979	188	0.98944	1	0.695824	2.45239e-15
AAYMNKVELQAK	K2C72_HUMAN	Q14CN4	D.AAYMNKVELQAK.V	14.09	17	0.98944	1	0.695824	2.45239e-15
AAYQQIVGGVNYYFNVK	CYTD_HUMAN	P28325	M.AAYQQIVGGVNYYFNVK.F	53.521	28	0.99192	1	1.05247	3.3661e-18
ADAAPDEKVLDSGFR	PIGR_HUMAN	P01833	K.ADAAPDEKVLDSGFR.E	34.817	59	0.99455	1	0.794518	6.54595e-15
ADAAPDEKVLDSGFREIENK	PIGR_HUMAN	P01833	K.ADAAPDEKVLDSGFREIENK.A	34.817	59	0.9942	1	1.05307	9.91382e-19
ADAEAWYQTK	KRT84_HUMAN	Q9NSB2	R.ADAEAWYQTK.Y	55.833	50	0.99365	1	-0.184506	1.11541e-12
ADAEQRGENALKDAHSK	K2C4_HUMAN	P19013	V.ADAEQRGENALKDAHSK.R	89.888	254	0.99296	1	1.18485	1.13305e-13
ADAVTLDGGFIYEAGLAPYK	TRFL_HUMAN	Q8TCD2	R.ADAVTLDGGFIYEAGLAPYK.L	43.099	62	0.99408	1	0.728298	9.36874e-22
ADDGRPFPQVIK	ALDOA_HUMAN	P04075	K.ADDGRPFPQVIK.S	57.143	22	0.99513	1	1.22821	9.76563e-17
ADEFLNWHALFESIK	KTDAP_HUMAN	P60985	K.ADEFLNWHALFESIK.R	28.283	4	0.93043	1	0.777121	3.44864e-14
ADEFLNWHALFESIKR	KTDAP_HUMAN	P60985	K.ADEFLNWHALFESIKR.K	28.283	4	0.99518	1	1.79879	3.60467e-16
ADEGISFR	PRDX1_HUMAN	Q06830	K.ADEGISFR.G	48.744	16	0.99451	1	0.692056	1.95313e-11
ADHGEPIGR	H90B3_HUMAN	Q58FF7	H.ADHGEPIGR.G	15.578	9	0.97167	1	0.581931	9.375e-11
ADHGEPIGR	HS90B_HUMAN	P08238	R.ADHGEPIGR.G	41.436	27	0.97167	1	0.581931	9.375e-11
ADHGEPIGRGTK	H90B3_HUMAN	Q58FF7	H.ADHGEPIGRGTK.V	15.578	9	0.99135	1	-0.0473872	3.56626e-11
ADHGEPIGRGTK	HS90B_HUMAN	P08238	R.ADHGEPIGRGTK.V	41.436	27	0.99135	1	-0.0473872	3.56626e-11
ADHPFLFFIR	ILEU_HUMAN	P30740	T.ADHPFLFFIR.H	62.005	26	0.99031	1	0.890017	8.80957e-11
ADIDVSGPKVDVDVPDVNIEGPDAK	AHNK_HUMAN	Q09666	K.ADIDVSGPKVDVDVPDVNIEGPDAK.L	37.25	105	0.9132	0.563127	0.415369	3.39258e-14
ADIDVSGPSVDTDAPDLDIEGPEGK	AHNK_HUMAN	Q09666	K.ADIDVSGPSVDTDAPDLDIEGPEGK.L	37.25	105	0.9831	1	-0.272823	1.61909e-18
ADIEISGPK	AHNK_HUMAN	Q09666	K.ADIEISGPK.V	37.25	105	0.96905	1	0.571898	2.15332e-12
ADKLAEEHSS	ATPB_HUMAN	P06576	K.ADKLAEEHSS.-	68.62	25	0.98936	1	1.60258	9.38477e-13
ADLDVSGPKVDVDVPDVNIEGPDAK	AHNK_HUMAN	Q09666	K.ADLDVSGPKVDVDVPDVNIEGPDAK.L	37.25	105	0.36541	1	0.934628	3.39258e-14
ADLELHYQEFIR	DESP_HUMAN	P15924	I.ADLELHYQEFIR.N	60.885	220	0.9954	1	0.565711	1.73828e-13
ADLEMQIENLKEELAYLK	K1C17_HUMAN	Q8N1P6	R.ADLEMQIENLKEELAYLK.K	72.685	56	0.99419	1	0.789866	2.68648e-16
ADLEMQIENLKEELAYLKK	K1C17_HUMAN	Q8N1P6	R.ADLEMQIENLKEELAYLKK.N	72.685	56	0.99381	1	1.38816	1.07697e-18
ADLEMQIESLK	K1C14_HUMAN	P02533	R.ADLEMQIESLK.E	78.178	88	0.9898	0.999883	0.437742	1.88291e-13
ADLEMQIESLKEELA	K1C14_HUMAN	P02533	R.ADLEMQIESLKEELA.Y	78.178	88	0.99084	1	-0.30841	3.77884e-11
ADLEMQIESLKEELAYLK	K1C14_HUMAN	P02533	R.ADLEMQIESLKEELAYLK.K	78.178	88	0.99501	1	0.81189	9.70703e-21
ADLEMQIESLKEELAYLKK	K1C14_HUMAN	P02533	R.ADLEMQIESLKEELAYLKK.N	78.178	88	0.99392	0.99496	0.997475	5.18041e-19
ADLEMQIESLTEELAYLK	K1C10_HUMAN	P13645	K.ADLEMQIESLTEELAYLK.K	63.185	55	0.9934	1	1.00232	4.57563e-20
ADLEMQIESLTEELAYLKK	K1C10_HUMAN	P13645	K.ADLEMQIESLTEELAYLKK.N	63.185	55	0.99414	1	0.929948	4.58845e-19
ADLGVSGPK	AHNK_HUMAN	Q09666	K.ADLGVSGPK.V	37.25	105	0.65536	1	0.523592	3.40542e-11
ADLINNLGTIAK	H90B2_HUMAN	Q58FF8	K.ADLINNLGTIAK.F	21.785	9	0.99519	1	0.755739	1.02158e-14
ADLINNLGTIAK	HS902_HUMAN	Q14568	K.ADLINNLGTIAK.S	26.239	7	0.99519	1	0.755739	1.02158e-14
ADLINNLGTIAK	HS90A_HUMAN	P07900	K.ADLINNLGTIAK.S	30.055	20	0.99519	1	0.755739	1.02158e-14
ADLINNLGTIAK	HS90B_HUMAN	P08238	K.ADLINNLGTIAK.S	41.436	27	0.99519	1	0.755739	1.02158e-14
ADLNDEWVQR	CYTN_HUMAN	P01037	N.ADLNDEWVQR.A	67.376	42	0.99202	1	0.968601	1.04732e-11
ADLNDEWVQR	CYTS_HUMAN	P01036	D.ADLNDEWVQR.A	71.631	32	0.99202	1	0.968601	1.04732e-11
ADLSGITGAR	AACT_HUMAN	Q6NSC9	K.ADLSGITGAR.N	37.825	13	0.99417	1	0.287857	8.20313e-13
ADLSGMSGAR	ILEU_HUMAN	P30740	K.ADLSGMSGAR.D	62.005	26	0.99449	1	1.10344	4.10156e-13
ADSGEGDFLAEGGGVR	FIBA_HUMAN	P02671	T.ADSGEGDFLAEGGGVR.G	22.171	18	0.94563	1	-1.1098	9.59132e-13
ADSSGHSQVGQGQSEGPR	FILA_HUMAN	P20930	R.ADSSGHSQVGQGQSEGPR.T	27.875	54	0.96542	1	-0.880811	9.8043e-21
ADTLTDEINFL	K2C6A_HUMAN	P02538	K.ADTLTDEINFL.R	91.844	201	0.992	1	0.697584	2.03588e-11
ADTLTDEINFL	K2C6B_HUMAN	P04259	K.ADTLTDEINFL.R	91.844	180	0.992	1	0.697584	2.03588e-11
ADTLTDEINFL	K2C6C_HUMAN	P48668	K.ADTLTDEINFL.R	82.979	188	0.992	1	0.697584	2.03588e-11
ADTLTDEINFLR	K2C6A_HUMAN	P02538	K.ADTLTDEINFLR.A	91.844	201	0.99435	1	0.507143	1.95313e-16
ADTLTDEINFLR	K2C6B_HUMAN	P04259	K.ADTLTDEINFLR.A	91.844	180	0.99435	1	0.507143	1.95313e-16
ADTLTDEINFLR	K2C6C_HUMAN	P48668	K.ADTLTDEINFLR.A	82.979	188	0.99435	1	0.507143	1.95313e-16
ADTLTDEINFLRA	K2C6A_HUMAN	P02538	K.ADTLTDEINFLRA.L	91.844	201	0.99368	1	0.695183	4.1001e-16
ADTLTDEINFLRA	K2C6B_HUMAN	P04259	K.ADTLTDEINFLRA.L	91.844	180	0.99368	1	0.695183	4.1001e-16
ADTLTDEINFLRA	K2C6C_HUMAN	P48668	K.ADTLTDEINFLRA.L	82.979	188	0.99368	1	0.695183	4.1001e-16
ADTLTDEINFLRALYDAELSQMQTHISDTSVVLSMDNNR	K2C6A_HUMAN	P02538	K.ADTLTDEINFLRALYDAELSQMQTHISDTSVVLSMDNNR.N	91.844	201	0.9902	1	0.733308	1.79205e-17
ADTLTDEINFLRALYDAELSQMQTHISDTSVVLSMDNNR	K2C6B_HUMAN	P04259	K.ADTLTDEINFLRALYDAELSQMQTHISDTSVVLSMDNNR.N	91.844	180	0.9902	1	0.733308	1.79205e-17
ADTLTDEINFLRALYDAELSQMQTHISDTSVVLSMDNNR	K2C6C_HUMAN	P48668	K.ADTLTDEINFLRALYDAELSQMQTHISDTSVVLSMDNNR.N	82.979	188	0.9902	1	0.733308	1.79205e-17
ADVDISGPKVDIEGPDVNIEGPEGK	AHNK_HUMAN	Q09666	K.ADVDISGPKVDIEGPDVNIEGPEGK.L	37.25	105	0.98846	0.547943	0.738649	3.55583e-14
ADVDVSGPK	AHNK_HUMAN	Q09666	K.ADVDVSGPK.M	37.25	105	0.98343	0.998232	0.935202	3.90625e-13
ADVDVSGPKVDVEGPDVNIEGPEGK	AHNK_HUMAN	Q09666	K.ADVDVSGPKVDVEGPDVNIEGPEGK.L	37.25	105	0.96442	1	-0.800129	1.45493e-13
ADVDVSGPKVDVEVPDVSLEGPEGK	AHNK_HUMAN	Q09666	K.ADVDVSGPKVDVEVPDVSLEGPEGK.L	37.25	105	0.92282	1	0.402996	1.56596e-11
ADVIVKPHDPATVDEVLR	CRNN_HUMAN	Q9UBG3	F.ADVIVKPHDPATVDEVLR.L	66.869	46	0.99254	1	1.03388	9.69205e-12
ADVLTTGAGNPVGDKLNVITVGPR	CATA_HUMAN	P04040	K.ADVLTTGAGNPVGDKLNVITVGPR.G	33.966	14	0.99442	1	0.0669832	5.30695e-22
ADVVVSGPK	AHNK_HUMAN	Q09666	K.ADVVVSGPK.V	37.25	105	0.89368	1	0.903523	1.25e-11
ADYDTLSLR	PKP3_HUMAN	Q9Y446	R.ADYDTLSLR.S	21.205	15	0.99382	0.998412	0.856806	1.64063e-11
ADYSGMSSGSGLYAQK	SPB13_HUMAN	Q9UIV8	K.ADYSGMSSGSGLYAQK.F	63.939	17	0.99351	1	-0.238723	1.46484e-20
AEAEALYQTK	K2C3_HUMAN	P12035	K.AEAEALYQTK.L	74.045	82	0.99545	1	1.2158	3.90625e-14
AEAEALYQTK	K2C4_HUMAN	P19013	K.AEAEALYQTK.V	89.888	254	0.99545	1	1.2158	3.90625e-14
AEAEALYQTK	K2C71_HUMAN	Q3SY84	K.AEAEALYQTK.F	10.516	14	0.99545	1	1.2158	3.90625e-14
AEAEALYQTK	K2C73_HUMAN	Q86Y46	K.AEAEALYQTK.F	19.074	22	0.99545	1	1.2158	3.90625e-14
AEAEALYQTK	K2C74_HUMAN	Q7RTS7	K.AEAEALYQTK.I	13.233	13	0.99545	1	1.2158	3.90625e-14
AEAEALYQTK	K2C78_HUMAN	Q8N1N4	K.AEAEALYQTK.Y	56.154	67	0.99545	1	1.2158	3.90625e-14
AEAESLYQSK	K2C1_HUMAN	P04264	K.AEAESLYQSK.Y	78.571	122	0.99489	1	1.01829	3.90625e-14
AEAESLYQSKYEELQITAGR	K2C1_HUMAN	P04264	K.AEAESLYQSKYEELQITAGR.H	78.571	122	0.99492	1	0.773702	1.87219e-21
AEAESWYQTK	K2C6A_HUMAN	P02538	R.AEAESWYQTK.Y	91.844	201	0.99552	1	0.218481	1.95313e-14
AEAESWYQTK	K2C6B_HUMAN	P04259	R.AEAESWYQTK.Y	91.844	180	0.99552	1	0.218481	1.95313e-14
AEAESWYQTK	K2C6C_HUMAN	P48668	R.AEAESWYQTK.Y	82.979	188	0.99552	1	0.218481	1.95313e-14
AEAESWYQTK	K2C75_HUMAN	O95678	R.AEAESWYQTK.Y	26.679	64	0.99552	1	0.218481	1.95313e-14
AEAESWYQTKYEELQITAGR	K2C6B_HUMAN	P04259	R.AEAESWYQTKYEELQITAGR.H	91.844	180	0.99241	1	-0.0153449	9.06791e-20
AEAESWYQTKYEELQVTAGR	K2C6A_HUMAN	P02538	R.AEAESWYQTKYEELQVTAGR.H	91.844	201	0.99504	1	0.772228	1.06637e-21
AEAESWYQTKYEELQVTAGR	K2C6C_HUMAN	P48668	R.AEAESWYQTKYEELQVTAGR.H	82.979	188	0.99504	1	0.772228	1.06637e-21
AEAESWYQTKYEELQVTAGR	K2C75_HUMAN	O95678	R.AEAESWYQTKYEELQVTAGR.H	26.679	64	0.99504	1	0.772228	1.06637e-21
AEAESWYQTKYEELQVTAGRHGDDLR	K2C6A_HUMAN	P02538	R.AEAESWYQTKYEELQVTAGRHGDDLR.N	91.844	201	0.9931	1	0.162842	1.96191e-19
AEAESWYQTKYEELQVTAGRHGDDLR	K2C6C_HUMAN	P48668	R.AEAESWYQTKYEELQVTAGRHGDDLR.N	82.979	188	0.9931	1	0.162842	1.96191e-19
AEAESWYQTKYEELQVTAGRHGDDLR	K2C75_HUMAN	O95678	R.AEAESWYQTKYEELQVTAGRHGDDLR.N	26.679	64	0.9931	1	0.162842	1.96191e-19
AEAESWYQTKYEELQVTAGRHGDDLRNTK	K2C6A_HUMAN	P02538	R.AEAESWYQTKYEELQVTAGRHGDDLRNTK.Q	91.844	201	0.98218	1	-0.370439	1.16674e-12
AEAESWYQTKYEELQVTAGRHGDDLRNTK	K2C6C_HUMAN	P48668	R.AEAESWYQTKYEELQVTAGRHGDDLRNTK.Q	82.979	188	0.98218	1	-0.370439	1.16674e-12
AEAESWYQTKYEELQVTAGRHGDDLRNTK	K2C75_HUMAN	O95678	R.AEAESWYQTKYEELQVTAGRHGDDLRNTK.Q	26.679	64	0.98218	1	-0.370439	1.16674e-12
AEAHFER	CF058_HUMAN	Q6P5S2	K.AEAHFER.S	59.697	25	0.98785	1	0.115215	7.8125e-11
AEAHFERSWVLAVDHLAAVLFPTTLIR	CF058_HUMAN	Q6P5S2	K.AEAHFERSWVLAVDHLAAVLFPTTLIR.S	59.697	25	0.9917	1	0.688812	2.50855e-15
AEASAFAESIDVELR	PEPL_HUMAN	O60437	R.AEASAFAESIDVELR.Q	64.18	115	0.99246	1	0.166046	5.81981e-18
AEDGSVIDYELIDQDAR	ANXA2_HUMAN	P07355	R.AEDGSVIDYELIDQDAR.D	67.552	50	0.9943	1	0.322505	1.4047e-18
AEDGSVIDYELIDQDARDLYDAGVK	ANXA2_HUMAN	P07355	R.AEDGSVIDYELIDQDARDLYDAGVK.R	67.552	50	0.84929	1	-0.0631568	1.21586e-16
AEDITNILSK	VTDB_HUMAN	P02774	L.AEDITNILSK.C	22.363	9	0.99143	1	0.818257	8.20313e-13
AEDPFIAIHAESKL	AMY1_HUMAN	P04745	S.AEDPFIAIHAESKL.-	82.387	288	0.98849	1	1.14522	1.89003e-12
AEDPFIAIHAESKL	AMY2B_HUMAN	P19961	S.AEDPFIAIHAESKL.-	71.429	212	0.98849	1	1.14522	1.89003e-12
AEDPFIAIHAESKL	AMYP_HUMAN	P04746	S.AEDPFIAIHAESKL.-	61.252	181	0.98849	1	1.14522	1.89003e-12
AEEREQIKTLNNK	K2C6A_HUMAN	P02538	R.AEEREQIKTLNNK.F	91.844	201	0.99447	1	0.956658	3.66719e-14
AEEREQIKTLNNK	K2C6B_HUMAN	P04259	R.AEEREQIKTLNNK.F	91.844	180	0.99447	1	0.956658	3.66719e-14
AEEREQIKTLNNK	K2C6C_HUMAN	P48668	R.AEEREQIKTLNNK.F	82.979	188	0.99447	1	0.956658	3.66719e-14
AEEREQIKTLNNK	K2C75_HUMAN	O95678	R.AEEREQIKTLNNK.F	26.679	64	0.99447	1	0.956658	3.66719e-14
AEEREQIKTLNNKFASFIDK	K2C6A_HUMAN	P02538	R.AEEREQIKTLNNKFASFIDK.V	91.844	201	0.9938	1	0.0409203	2.44733e-14
AEEREQIKTLNNKFASFIDK	K2C6B_HUMAN	P04259	R.AEEREQIKTLNNKFASFIDK.V	91.844	180	0.9938	1	0.0409203	2.44733e-14
AEEREQIKTLNNKFASFIDK	K2C6C_HUMAN	P48668	R.AEEREQIKTLNNKFASFIDK.V	82.979	188	0.9938	1	0.0409203	2.44733e-14
AEEREQIKTLNNKFASFIDK	K2C75_HUMAN	O95678	R.AEEREQIKTLNNKFASFIDK.V	26.679	64	0.9938	1	0.0409203	2.44733e-14
AEEREQIKTLNNKFASFIDKV	K2C6A_HUMAN	P02538	R.AEEREQIKTLNNKFASFIDKV.R	91.844	201	0.98769	1	0.687934	1.42925e-11
AEEREQIKTLNNKFASFIDKV	K2C6B_HUMAN	P04259	R.AEEREQIKTLNNKFASFIDKV.R	91.844	180	0.98769	1	0.687934	1.42925e-11
AEEREQIKTLNNKFASFIDKV	K2C6C_HUMAN	P48668	R.AEEREQIKTLNNKFASFIDKV.R	82.979	188	0.98769	1	0.687934	1.42925e-11
AEEREQIKTLNNKFASFIDKV	K2C75_HUMAN	O95678	R.AEEREQIKTLNNKFASFIDKV.R	26.679	64	0.98769	1	0.687934	1.42925e-11
AEEREQIKTLNNKFASFIDKVR	K2C6A_HUMAN	P02538	R.AEEREQIKTLNNKFASFIDKVR.F	91.844	201	0.99418	1	1.43344	9.965e-19
AEEREQIKTLNNKFASFIDKVR	K2C6B_HUMAN	P04259	R.AEEREQIKTLNNKFASFIDKVR.F	91.844	180	0.99418	1	1.43344	9.965e-19
AEEREQIKTLNNKFASFIDKVR	K2C6C_HUMAN	P48668	R.AEEREQIKTLNNKFASFIDKVR.F	82.979	188	0.99418	1	1.43344	9.965e-19
AEEREQIKTLNNKFASFIDKVR	K2C75_HUMAN	O95678	R.AEEREQIKTLNNKFASFIDKVR.F	26.679	64	0.99418	1	1.43344	9.965e-19
AEEYEFLTPVEEAPK	GDIR1_HUMAN	P52565	R.AEEYEFLTPVEEAPK.G	22.549	3	0.99359	1	0.415746	4.35471e-14
AEFAEVSK	ALBU_HUMAN	Q9P157	K.AEFAEVSK.L	62.069	148	0.99413	1	1.30243	3.90625e-12
AEFAEVSKL	ALBU_HUMAN	Q9P157	K.AEFAEVSKL.V	62.069	148	0.93363	1	0.518278	1.64063e-11
AEFAEVSKLVTDLTK	ALBU_HUMAN	Q9P157	K.AEFAEVSKLVTDLTK.V	62.069	148	0.99327	1	0.857634	2.50244e-20
AEFQDALEKLNMGITDLQGLR	CO4A_HUMAN	Q5JQM8	K.AEFQDALEKLNMGITDLQGLR.L	35.378	36	0.99312	1	0.82547	1.2711e-12
AEFQDALEKLNMGITDLQGLR	CO4B_HUMAN	Q9UIP5	K.AEFQDALEKLNMGITDLQGLR.L	35.378	36	0.99312	1	0.82547	1.2711e-12
AEGPEVDVNLPK	AHNK_HUMAN	Q09666	K.AEGPEVDVNLPK.A	37.25	105	0.99459	1	0.820514	4.88281e-17
AEGSDVANAVLDGADCIMLSGETAKG	KPYM_HUMAN	Q9BWB5	R.AEGSDVANAVLDGADCIMLSGETAKG.D	64.783	41	0.99395	1	0.492552	4.29481e-14
AEIDNVKK	K2C5_HUMAN	P13647	R.AEIDNVKK.Q	71.695	147	0.98197	1	0.068487	1.5625e-11
AEIENIKK	K2C4_HUMAN	P19013	R.AEIENIKK.Q	89.888	254	0.9926	0.987573	0.651805	3.125e-11
AEILELAGNAAR	H2A1B_HUMAN	P04908	T.AEILELAGNAAR.D	62.308	22	0.99481	1	0.822476	9.86328e-15
AEILELAGNAAR	H2A1C_HUMAN	Q93077	T.AEILELAGNAAR.D	67.692	23	0.99481	1	0.822476	9.86328e-15
AEILELAGNAAR	H2A1D_HUMAN	P20671	T.AEILELAGNAAR.D	62.308	27	0.99481	1	0.822476	9.86328e-15
AEILELAGNAAR	H2A1H_HUMAN	Q96KK5	T.AEILELAGNAAR.D	68.75	28	0.99481	1	0.822476	9.86328e-15
AEILELAGNAAR	H2A1J_HUMAN	Q99878	T.AEILELAGNAAR.D	68.75	28	0.99481	1	0.822476	9.86328e-15
AEILELAGNAAR	H2A1_HUMAN	P0C0S8	T.AEILELAGNAAR.D	67.692	28	0.99481	1	0.822476	9.86328e-15
AEILELAGNAAR	H2A2A_HUMAN	Q6FI13	T.AEILELAGNAAR.D	67.692	29	0.99481	1	0.822476	9.86328e-15
AEILELAGNAAR	H2A2B_HUMAN	Q8IUE6	T.AEILELAGNAAR.D	62.308	19	0.99481	1	0.822476	9.86328e-15
AEILELAGNAAR	H2A2C_HUMAN	Q16777	T.AEILELAGNAAR.D	68.217	29	0.99481	1	0.822476	9.86328e-15
AEILELAGNAAR	H2A3_HUMAN	Q7L7L0	T.AEILELAGNAAR.D	62.308	22	0.99481	1	0.822476	9.86328e-15
AEILELAGNAAR	H2AJ_HUMAN	Q9BTM1	T.AEILELAGNAAR.D	68.217	28	0.99481	1	0.822476	9.86328e-15
AEILELAGNAAR	H2AX_HUMAN	P16104	T.AEILELAGNAAR.D	56.643	20	0.99481	1	0.822476	9.86328e-15
AEILELAGNAAR	H2AY_HUMAN	O75367	T.AEILELAGNAAR.D	11.559	14	0.99481	1	0.822476	9.86328e-15
AEKETELSLQK	TRI29_HUMAN	Q14134	K.AEKETELSLQK.E	31.973	17	0.98302	1	1.00857	6.98298e-13
AEKLHQAMK	ANXA1_HUMAN	P04083	F.AEKLHQAMK.G	84.393	98	0.98502	1	1.39765	3.16406e-11
AEKLHQAMKGVGTR	ANXA1_HUMAN	P04083	F.AEKLHQAMKGVGTR.H	84.393	98	0.99047	1	0.635616	2.94537e-16
AELDTLSEESYKDSTLIMQLLR	1433E_HUMAN	P62258	I.AELDTLSEESYKDSTLIMQLLR.D	35.686	14	0.80543	1	-0.127002	6.53924e-14
AELDTLSEESYKDSTLIMQLLR	1433Z_HUMAN	Q6NUR9	I.AELDTLSEESYKDSTLIMQLLR.D	75.51	34	0.80543	1	-0.127002	6.53924e-14
AELIVQPELK	DESP_HUMAN	P15924	R.AELIVQPELK.Y	60.885	220	0.99548	1	0.738588	1.26378e-12
AELIVQPELKYGDGIQLTR	DESP_HUMAN	P15924	R.AELIVQPELKYGDGIQLTR.S	60.885	220	0.9916	1	0.379102	4.47122e-17
AELNEFLTR	RS3_HUMAN	P23396	K.AELNEFLTR.E	27.16	7	0.99468	1	1.05061	6.89649e-12
AELQEGAR	APOA1_HUMAN	P02647	R.AELQEGAR.Q	77.528	49	0.87368	1	-0.0356474	1.60156e-11
AEMDMVAWGVDLASVEQHINSHR	DESP_HUMAN	P15924	R.AEMDMVAWGVDLASVEQHINSHR.G	60.885	220	0.99497	1	0.786215	2.57091e-19
AEMREQYEAMAER	K1C13_HUMAN	P13646	L.AEMREQYEAMAER.N	81.004	196	0.99398	1	1.00639	1.33173e-13
AENDFVVLK	K2C4_HUMAN	P19013	A.AENDFVVLK.K	89.888	254	0.75344	1	0.542502	1.66992e-11
AENEFVTIKK	K2C1_HUMAN	P04264	N.AENEFVTIKK.D	78.571	122	0.993	0.555042	0.631945	4.64653e-12
AENEFVTLKK	K2C3_HUMAN	P12035	A.AENEFVTLKK.D	74.045	82	0.96841	0.99998	0.259164	4.64653e-12
AENEFVTLKK	K2C6A_HUMAN	P02538	A.AENEFVTLKK.D	91.844	201	0.96841	0.99998	0.259164	4.64653e-12
AENEFVTLKK	K2C6B_HUMAN	P04259	A.AENEFVTLKK.D	91.844	180	0.96841	0.99998	0.259164	4.64653e-12
AENEFVTLKK	K2C6C_HUMAN	P48668	A.AENEFVTLKK.D	82.979	188	0.96841	0.99998	0.259164	4.64653e-12
AENFFILR	ARPC4_HUMAN	P59998	R.AENFFILR.R	29.762	4	0.99336	1	0.917267	1.64063e-11
AENGKLVINGNPITIFQER	G3P_HUMAN	P04406	K.AENGKLVINGNPITIFQER.D	91.045	66	0.73904	1	0.464791	3.56553e-11
AENGKLVINGNPITIFQERDPSK	G3P_HUMAN	P04406	K.AENGKLVINGNPITIFQERDPSK.I	91.045	66	0.99497	1	1.19342	2.2755e-20
AENYDIPSADR	UBA1_HUMAN	P22314	R.AENYDIPSADR.H	12.476	9	0.957	1	0.443197	6.32736e-11
AENYPEVSIDQVGQVLTCSLETG	MUC5B_HUMAN	Q7M4S5	R.AENYPEVSIDQVGQVLTCSLETG.L	8.712	58	0.9733	1	0.271506	5.18947e-11
AENYPEVSIDQVGQVLTCSLETGLTCKN	MUC5B_HUMAN	Q7M4S5	R.AENYPEVSIDQVGQVLTCSLETGLTCKN.E	8.712	58	0.99392	1	0.516605	7.89832e-18
AEPEDHYFLLTEPPLNTPENR	ARP3_HUMAN	P61158	R.AEPEDHYFLLTEPPLNTPENR.E	27.99	8	0.99369	1	1.56022	1.55216e-18
AESEVANLR	PEPL_HUMAN	O60437	K.AESEVANLR.L	64.18	115	0.99027	1	0.84871	3.90625e-13
AESGPDLRYEVTSGGGGTSR	DESP_HUMAN	P15924	R.AESGPDLRYEVTSGGGGTSR.M	60.885	220	0.97587	1	0.230234	3.52468e-18
AESMLQQADK	PLST_HUMAN	P13797	R.AESMLQQADK.L	44.286	22	0.98951	1	0.172395	2.39109e-11
AEYMNHLIDIGVAGFR	AMY1_HUMAN	P04745	I.AEYMNHLIDIGVAGFR.I	82.387	288	0.95465	1	1.31814	5.6248e-12
AEYMNHLIDIGVAGFR	AMY2B_HUMAN	P19961	I.AEYMNHLIDIGVAGFR.L	71.429	212	0.95465	1	1.31814	5.6248e-12
AEYMNHLIDIGVAGFR	AMYP_HUMAN	P04746	I.AEYMNHLIDIGVAGFR.L	61.252	181	0.95465	1	1.31814	5.6248e-12
AFAGGYGGGFGSGYGGGFGGGFGGGR	K2C3_HUMAN	P12035	C.AFAGGYGGGFGSGYGGGFGGGFGGGR.G	74.045	82	0.99335	1	1.07831	1.70022e-31
AFALWSAVTPLTFTR	MMP9_HUMAN	P14780	R.AFALWSAVTPLTFTR.V	19.095	9	0.99446	1	0.430501	9.05819e-17
AFAMIIDKLEEDINSSMTNSTAASRPPVTLR	PCBP1_HUMAN	Q15365	K.AFAMIIDKLEEDINSSMTNSTAASRPPVTLR.L	15.169	3	0.99432	1	1.20739	4.69316e-16
AFATTPDGYTPELPLPLIIK	DSC2_HUMAN	Q02487	I.AFATTPDGYTPELPLPLIIK.I	25.749	15	0.97573	1	-0.190244	1.88297e-16
AFEEAEKNAPAIIFIDELDAIAPKR	TERA_HUMAN	P55072	K.AFEEAEKNAPAIIFIDELDAIAPKR.E	35.112	21	0.99269	1	0.618599	7.87008e-16
AFGFSHLEALLDDSKELQR	OTUB1_HUMAN	Q96FW1	R.AFGFSHLEALLDDSKELQR.F	22.14	3	0.99184	1	1.65891	1.00983e-16
AFGQFFSPGEVIYNK	MUC5B_HUMAN	Q7M4S5	R.AFGQFFSPGEVIYNK.T	8.712	58	0.99439	1	-0.0526181	2.49146e-17
AFHDNEETFLK	ALBU_HUMAN	Q9P157	T.AFHDNEETFLK.K	62.069	148	0.99407	1	1.0577	1.95313e-14
AFHDNEETFLKK	ALBU_HUMAN	Q9P157	T.AFHDNEETFLKK.Y	62.069	148	0.99491	1	0.533322	1.05469e-15
AFHEQPELQK	CYTN_HUMAN	P01037	C.AFHEQPELQK.K	67.376	42	0.99504	1	1.08052	4.34508e-11
AFHEQPELQK	CYTS_HUMAN	P01036	C.AFHEQPELQK.K	71.631	32	0.99504	1	1.08052	4.34508e-11
AFHEQPELQK	CYTT_HUMAN	P09228	C.AFHEQPELQK.K	67.376	22	0.99504	1	1.08052	4.34508e-11
AFHEQPELQKK	CYTN_HUMAN	P01037	C.AFHEQPELQKK.Q	67.376	42	0.99448	1	0.937354	3.07564e-12
AFHEQPELQKK	CYTS_HUMAN	P01036	C.AFHEQPELQKK.Q	71.631	32	0.99448	1	0.937354	3.07564e-12
AFHEQPELQKK	CYTT_HUMAN	P09228	C.AFHEQPELQKK.Q	67.376	22	0.99448	1	0.937354	3.07564e-12
AFHFLNRFPS	DMBT1_HUMAN	Q9Y4V9	R.AFHFLNRFPS.V	19.271	19	0.99259	1	0.723702	4.8199e-12
AFHFLNRFPSVYLR	DMBT1_HUMAN	Q9Y4V9	R.AFHFLNRFPSVYLR.C	19.271	19	0.9926	1	0.984178	1.35636e-16
AFIGFEGVK	DESP_HUMAN	P15924	K.AFIGFEGVK.G	60.885	220	0.99541	1	0.854511	1.5625e-12
AFKAWAVAR	ALBU_HUMAN	Q9P157	R.AFKAWAVAR.L	62.069	148	0.99173	1	0.553128	3.90625e-13
AFLADPSAFVAAAPVAAATTAAPAAAAAPAK	RLA0_HUMAN	P05388	K.AFLADPSAFVAAAPVAAATTAAPAAAAAPAK.V	32.492	7	0.66878	1	1.06703	1.50898e-17
AFLASPEYV	GSTP1_HUMAN	P09211	K.AFLASPEYV.N	68.571	27	0.98688	1	0.895232	1.5625e-12
AFLASPEYVNLPINGNGK	GSTP1_HUMAN	P09211	K.AFLASPEYVNLPINGNGK.Q	68.571	27	0.99523	1	0.920134	2.76888e-19
AFLASPEYVNLPINGNGKQ	GSTP1_HUMAN	P09211	K.AFLASPEYVNLPINGNGKQ.-	68.571	27	0.99313	1	0.961674	4.35606e-20
AFLTLAEDILR	RAB10_HUMAN	P61026	K.AFLTLAEDILR.K	24.5	5	0.99477	1	1.04743	7.8125e-15
AFMTADLPNELIELLEK	CLH1_HUMAN	Q00610	K.AFMTADLPNELIELLEK.I	22.149	27	0.9915	1	0.722248	1.45445e-19
AFMTADLPNELIELLEK	CLH2_HUMAN	P53675	K.AFMTADLPNELIELLEK.I	4.817	7	0.9915	1	0.722248	1.45445e-19
AFQPFFVELTMPYSVIR	A2MG_HUMAN	P01023	R.AFQPFFVELTMPYSVIR.G	51.493	60	0.99453	1	1.16822	8.22923e-19
AFQPFFVELTMPYSVIR	PZP_HUMAN	P20742	R.AFQPFFVELTMPYSVIR.G	3.914	5	0.99453	1	1.16822	8.22923e-19
AFQPFFVELTMPYSVIRGEAFTLK	A2MG_HUMAN	P01023	R.AFQPFFVELTMPYSVIRGEAFTLK.A	51.493	60	0.98614	1	0.565465	2.19604e-12
AFTGIEDPVTK	EVPL_HUMAN	Q92817	K.AFTGIEDPVTK.K	44.761	77	0.99466	1	1.26874	4.7273e-14
AFTQVNSEDKGALAK	RL7A_HUMAN	P62424	V.AFTQVNSEDKGALAK.L	19.549	5	0.99264	1	0.0674988	8.68785e-16
AFVHWYVGEGMEEGEFSEAR	TBA1A_HUMAN	Q71U36	R.AFVHWYVGEGMEEGEFSEAR.E	52.993	23	0.99266	1	0.936191	1.4596e-18
AFVHWYVGEGMEEGEFSEAR	TBA1B_HUMAN	P68363	R.AFVHWYVGEGMEEGEFSEAR.E	52.993	23	0.99266	1	0.936191	1.4596e-18
AFVHWYVGEGMEEGEFSEAR	TBA1C_HUMAN	Q9BQE3	R.AFVHWYVGEGMEEGEFSEAR.E	53.229	23	0.99266	1	0.936191	1.4596e-18
AFVHWYVGEGMEEGEFSEAR	TBA3C_HUMAN	Q13748	R.AFVHWYVGEGMEEGEFSEAR.E	41.556	18	0.99266	1	0.936191	1.4596e-18
AFVHWYVGEGMEEGEFSEAR	TBA3E_HUMAN	Q6PEY2	W.AFVHWYVGEGMEEGEFSEAR.E	35.333	13	0.99266	1	0.936191	1.4596e-18
[truncated: 11,602 more rows]
