# Supplementary material
Source: publisher figshare collection journal article supplement (https://plos.figshare.com/articles/dataset/_/992947)
Supplement: Supplementary file 1 [file 1 › Table_S3.xlsx]

## Sheet: HIVpositive
Protein	UniProt	Description	PeptideCount1	Corr	Pvalue	AdjPval	P01_0	P01_100	P01_102	P02_0	P02_35	P02_36	P02_100	P02_102	P04_0	P04_35	P04_36	P04_100	P04_102	P05_0	P05_35	P05_36	P05_100	P05_102	P06_0	P06_35	P06_100	P06_102	P07_0	P07_35	P07_36	P07_100	P07_102	P08_0	P08_35	P08_36	P08_100	P08_102	P10_0	P10_35	P10_36	P10_100	P10_102
1433B_HUMAN	P31946	14-3-3 protein beta/alpha	8	0.103202	0.549198	0.677617	21.47	22.74	23.23	21.5	22.57	21.84	22.76	22.33	22.39	21.37	22.4	22.15	22.53	22.42	23.02	22.79	22.56	22.85	22.63	21.94	22.13	22.79	22.02	22.83	22.81	23.18	23.03	21.07	21.05	20.1	21.7	22.29	22.7	21.98	23.35	22.34	20.5
1433E_HUMAN	P62258	14-3-3 protein epsilon	5	0.0563334	0.744174	0.828695	21.66	22.64	22.99	21.46	22.36	21.9	22.95	22.24	22.88	21.4	22.69	22.3	22.62	22.25	23.42	23	23.18	23.49	22.73	22.18	22.74	22.9	22.1	22.99	23.18	23.35	23.18	21.14	21.2	19.61	22.7	22.65	23.18	20.89	23.36	22.76	20.35
1433F_HUMAN	Q04917	14-3-3 protein eta	2	0.19098	0.264529	0.401243	25.66	25.1	25.11	25.37	24.7	24.48	25.37	25.08	25.71	24.6	24.96	25.06	25.33	25.26	25.69	25.79	25.95	25.81	25.18	24.88	25.08	25.54	25.5	25.52	25.88	25.59	26.15	25.15	25.05	24.24	25.44	25.62	26.03	25.42	25.58	25.64	22.6
1433G_HUMAN	P61981	14-3-3 protein gamma	4	0.0893106	0.604466	0.725944	23.83	23.49	22.52	23.16	23.14	22.67	23.44	23.02	23.73	22.49	23.25	21.83	23.4	23.42	23.74	23.63	23.5	23.6	23.23	21.47	22.8	23.41	23.47	23.67	23.49	23.69	22.98	22.43	22.8	19.85	22.74	23.96	23.66	22.74	22.3	23.04	19.07
1433S_HUMAN	P31947	14-3-3 protein sigma	17	0.0920755	0.593277	0.714237	22.76	24.02	23.56	23.33	23.82	22.68	23.69	23.82	23.41	23.35	22.8	23.14	24.06	23.54	24.22	23.88	23.31	23.74	22.96	23.17	23.63	23.3	23.09	23.79	23.07	23.18	23.95	23.05	23.02	21.6	21.79	22.85	24.13	22.78	23.95	24.13	21.03
1433T_HUMAN	P27348	14-3-3 protein theta	5	0.0311228	0.857004	0.896943	21.23	22.51	23.06	21.75	22.6	21.92	23.04	22.51	22.59	21.03	22.63	22.32	22.71	23.3	23.23	23.06	22.93	23.05	22.81	21.81	22.47	22.89	22	22.96	22.92	23.33	22.93	20.8	20.74	20.59	21.55	22.58	22.98	21.51	23.44	22.26	20.52
1433Z_HUMAN	Q6NUR9	14-3-3 protein zeta/delta	14	-0.0963067	0.576333	0.70064	22.83	23.21	23.44	23.29	23.17	22.49	23.85	23.35	23.37	22.32	22.75	23.07	23.46	23.16	23.79	23.56	23.79	23.89	23.44	23.26	23.07	23.67	23.21	23.52	23.54	24.31	24.35	22.54	22.46	22.32	23.34	23.51	23.4	22.89	23.75	23.24	21.87
6PGD_HUMAN	P52209	6-phosphogluconate dehydrogenase, decarboxylating	17	0.41486	0.0118749	0.0677006	22.19	21.96	21.9	20.02	21.78	21.13	21.27	20.7	22.42	21.33	21.38	21.22	21.94	18.19	21.93	20.46	21.64	21.69	19.21	19.43	21.01	21.84	20.9	21.05	21.2	20.67	21.89	21.64	20.98	19.13	19.97	21.47	21.66	21.35	21.79	21.95	17.88
A1AG1_HUMAN	P02763	Alpha-1-acid glycoprotein 1	4	0.312183	0.063793	0.1631	22.48	21.55	23.34	22.18	22.91	22.68	21.46	22.65	22.04	21.92	19.69	23.83	23.64	24.16	22.11	19.9	22.51	22.94	20.11	21.09	19.2	17.74	18.89	18.38	18.22	18.89	17.04	19.57	17.87	17.54	19.94	19.21	22.19	20.38	24.13	21.92	17.1
A1AG2_HUMAN	P19652	Alpha-1-acid glycoprotein 2	2	0.108835	0.527487	0.665735	22.56	22.06	23.18	21.93	22.26	22.56	21.85	22.29	21.48	21.17	14.94	23.82	24	23.92	21.12	20.27	21.6	21.98	21.73	18.18	21.45	19.33	18.61	15.3	18.76	17.81	17.18	20.71	15.1	19.45	19.5	17.27	22.27	21.05	23.76	21.58	22.78
A1AT_HUMAN	Q86U18	Alpha-1-antitrypsin	14	0.111325	0.518028	0.658825	22.14	20.03	22.05	22.35	22.07	21.82	21.75	22.25	22.89	20.66	22.68	23.34	23.57	24.37	22.75	22.23	22.98	23.74	22.8	23.67	22.78	21.45	20.62	19.57	20.53	20.69	19.68	22.9	21.11	23.46	20.07	19.92	20.97	21.12	23.43	21.61	22.63
A2MG_HUMAN	P01023	Alpha-2-macroglobulin	26	0.301431	0.0740067	0.174344	19.02	17.45	16.78	16.04	20.3	20.25	19.69	21.14	21.15	23.06	17.13	22.06	21.98	19.08	20.95	16.63	13.92	18.81	18.2	17.37	13.58	13.14	12.55	12.07	12.39	12.47	11.53	16.95	17.71	22.51	21.22	19.55	13.48	18.58	20.44	18.27	22.89
A2ML1_HUMAN	A8K2U0	Alpha-2-macroglobulin-like protein 1	29	-0.0224492	0.8966	0.926487	22.61	22.53	21.93	22.27	22.72	22.22	22.76	22.3	23.08	23.14	22.98	22.95	22.85	22.37	23.13	22.77	23	22.93	22.64	22.77	22.89	23.3	22.84	23.3	23.07	23.3	23.5	20.98	21.52	20.85	21.47	21.64	22.7	21.39	22.15	23.16	22.95
AACT_HUMAN	Q6NSC9	Alpha-1-antichymotrypsin	2	0.107396	0.532995	0.66654	23.2	16.11	19.81	16.17	20.88	21.2	20.85	18.52	22.2	17.36	19.39	21.97	21.39	23.75	19.92	21.04	21.9	22.22	20.07	19.75	23.22	20.72	18.6	19.16	18.12	16.38	19.8	18.61	16.11	21.98	20.93	15.51	18.45	20.23	22.75	21.46	22.35
ACTA_HUMAN	P62736	Actin, aortic smooth muscle	28	0.250833	0.140054	0.257414	24.49	25.6	25.43	23.55	24.39	24.36	24.76	24.55	23.79	24.32	24.98	24.3	24.22	24.5	24.45	24.41	24.48	24.72	23.51	23.34	24.46	24.48	22.82	24.69	24.24	24.03	23.92	23.02	24.44	23.57	22.45	23	24.47	23.39	26.1	23.63	21.75
ACTBL_HUMAN	Q562R1	Beta-actin-like protein 2	15	0.416152	0.0115872	0.0668285	24.03	25.14	25	21.86	23.48	23.78	23.35	22.76	22.89	23.7	24.41	23.42	23.62	23.78	24.17	22.96	22.91	23.23	21.32	21.57	23.29	20.53	20.68	22.84	21.67	20.57	20.75	21.43	21.82	22.2	20.7	22.5	23.83	22.72	25.64	22.8	22.95
ACTBM_HUMAN	Q9BYX7	Beta-actin-like protein 3	15	0.529799	0.000890417	0.0142624	25.39	25.22	25.37	23.18	24.46	24.78	24.46	23.95	24.14	25.24	24.71	24.68	24.88	23.85	23.91	23.99	24.17	23.87	22.25	21.93	23.09	23.81	22.78	23.58	22.5	22.14	24.34	22.93	22.99	22.71	21.91	23.39	24.17	24.38	26.16	24.56	15.44
ACTB_HUMAN	Q96HG5	Actin, cytoplasmic 1	48	0.407885	0.0135342	0.0699269	24.51	24.9	25.18	21.72	23.83	23.58	23.37	22.66	22.37	24.2	23.67	23.74	23.81	23.07	24.14	22.97	22.73	23.35	22.36	21.74	22.36	21.96	22	23.26	22.9	22.74	21.94	21.4	22.37	22.03	20.9	22.62	23.64	23.27	25.5	23.04	23.65
ACTC_HUMAN	P68032	Actin, alpha cardiac muscle 1	32	0.263299	0.120767	0.235174	24.49	25.58	25.47	23.62	24.47	24.43	24.82	24.62	23.83	24.44	25.09	24.41	24.31	24.49	24.56	24.52	24.58	24.7	23.59	23.38	24.13	24.56	23.05	24.86	24.34	24.24	23.95	23.23	24.56	23.76	22.56	23.3	24.51	23.28	26.04	23.81	18.46
ACTG_HUMAN	P63261	Actin, cytoplasmic 2	48	0.407885	0.0135342	0.0699269	24.51	24.9	25.18	21.72	23.83	23.58	23.37	22.66	22.37	24.2	23.67	23.74	23.81	23.07	24.14	22.97	22.73	23.35	22.36	21.74	22.36	21.96	22	23.26	22.9	22.74	21.94	21.4	22.37	22.03	20.9	22.62	23.64	23.27	25.5	23.04	22.61
ACTH_HUMAN	P63267	Actin, gamma-enteric smooth muscle	28	0.250833	0.140054	0.257414	24.49	25.6	25.43	23.55	24.39	24.36	24.76	24.55	23.79	24.32	24.98	24.3	24.22	24.5	24.45	24.41	24.48	24.72	23.51	23.34	24.46	24.48	22.82	24.69	24.24	24.03	23.92	23.02	24.44	23.57	22.45	23	24.47	23.39	26.1	23.63	21.73
ACTN1_HUMAN	P12814	Alpha-actinin-1	10	0.458532	0.00491472	0.0406297	22.14	21.02	21.51	20.4	20.16	20.58	21.71	20.76	22.15	21.48	21.78	21.9	21.01	21.11	21.22	20.9	20.72	21.82	19.08	20.18	19.94	20.45	20.03	21.67	21.53	20.96	21.15	20.81	21.3	20.22	19.53	19.27	20.76	20.38	21.7	21.35	21.61
ACTN2_HUMAN	P35609	Alpha-actinin-2	4	0.321536	0.0558435	0.149721	20.55	22.49	20.24	21.01	21.24	21.31	21.18	21.56	20.68	20.7	22.55	21.99	22.22	20.47	17.67	19.6	22.1	22.26	19.46	20.47	20.19	21.76	22.35	22.27	21.9	20	22.37	22.27	22.2	21.02	20.62	21.5	21.67	21.67	21.56	18.89	24.56
ACTN3_HUMAN	Q08043	Alpha-actinin-3	2	0.122883	0.475235	0.626906	22.66	22.28	19.43	18.66	16.94	18.62	21.92	18.91	22.74	22.32	22.38	22.37	18.77	19.83	20.11	18.72	17.64	22.08	20.97	21.61	18.79	21.82	19.84	22.45	22.05	22.63	22.85	19.52	22.24	21.41	19.93	18.61	18.07	19.39	21.26	18.96	18.81
ACTN4_HUMAN	O43707	Alpha-actinin-4	27	0.397519	0.0163587	0.0812406	21.02	21.09	19.98	19.08	20.49	20.07	21.17	19.12	21.55	20.03	21.18	20.89	20.42	19.65	20.59	21.04	21.3	21.17	19.14	18.4	18.06	20.97	21.24	21.69	20.57	21.9	21.73	20.76	21.36	17.65	20.03	19.45	20.61	19.72	20.88	20.71	21.01
ACTS_HUMAN	P68133	Actin, alpha skeletal muscle	30	0.182787	0.285954	0.423383	24.48	25.6	25.52	23.72	24.49	24.4	24.9	24.64	23.83	24.39	25.13	24.43	24.32	24.53	24.59	24.59	24.72	24.87	23.92	23.69	24.19	24.89	23.43	24.94	24.72	24.82	24.29	23.35	24.69	23.83	22.81	23.37	24.51	23.21	26.04	23.75	19.29
ADH7_HUMAN	P40394	Alcohol dehydrogenase class 4 mu/sigma chain	2	0.0588579	0.733118	0.823808	19.7	25.4	12.67	18.83	17.34	19.59	20.82	17.51	21.88	17.86	21.32	19.63	20.75	19.89	20.47	16.72	20.98	19.21	18.98	19.3	20.75	22.01	17.99	21.12	20.94	21.22	18.69	18.62	21.53	16.79	15.85	17.69	19.26	17.98	19.52	18.7	20.09
ADT1_HUMAN	P12235	ADP/ATP translocase 1	2	0.19857	0.24565	0.381952	21.4	18.04	19.38	19.55	20.15	20.26	20.04	15.05	18.19	11.37	21.55	21.1	22.16	15.08	20.74	18.89	20.64	18.13	16.98	19.4	17.99	19.3	20.3	16.68	18.45	18.34	17.21	16.23	20.04	18.78	14.22	20.03	21.92	20.96	21.74	21.56	16.1
ADT2_HUMAN	P05141	ADP/ATP translocase 2	4	0.275599	0.103755	0.220073	21.49	19.9	20.34	21.23	20.37	20.46	20.61	16.81	20.41	15.78	22.12	21.7	22.25	18.52	19.48	20.6	21.39	18.32	19.03	19.71	19.52	20.68	20.94	19.36	20.12	19.86	19.77	19.12	19	18.75	17.9	20.94	22	21.51	22.12	21.63	21.9
ADT3_HUMAN	P12236	ADP/ATP translocase 3	4	0.250949	0.139864	0.257414	21.09	19.48	19.87	21.12	19.94	20.42	20.35	17.04	19.72	15.72	21.66	21.13	21.71	17.9	20.35	19.91	20.85	18.24	18.57	19.37	19.15	19.96	20.45	18.83	19.71	19.26	19.28	18.5	19.98	18.96	17.43	20.36	21.53	20.87	21.9	21.12	18.87
AHNK_HUMAN	Q09666	Neuroblast differentiation-associated protein AHNAK	36	0.356727	0.0327083	0.109249	19.74	21.63	21.13	19.73	20.5	20.88	21.01	18.94	21.97	19.03	21.84	21.95	22.08	20.44	20.78	21.47	22.15	21.91	20.26	18.68	18.59	21.06	21.69	21.17	21.47	21.95	21.68	22.33	22.13	17.63	20.94	20.29	20.42	18.53	21.35	21.31	21.51
AK1BA_HUMAN	O60218	Aldo-keto reductase family 1 member B10	6	0.233419	0.170656	0.293908	22.03	21.63	19.17	19.03	21.53	20.07	20.93	19.25	22.08	22.13	21.69	21.38	22.02	19.45	22.12	21.5	21.67	21.5	22.56	19.73	20.56	21.58	20.77	21.43	22.32	21.76	22.56	19.42	21	19.78	20.08	22.39	21.02	20	20.03	21.31	17.49
AL3A1_HUMAN	P30838	Aldehyde dehydrogenase, dimeric NADP-preferring	11	-0.114772	0.505069	0.650686	23.74	20.45	21.31	20.94	20.11	21.44	21.16	20.03	22.65	20.49	20.45	22.22	22.41	19.85	22.37	21.54	20.02	20.5	21.82	21.02	22.5	22.53	21.88	22.56	22.17	22.41	22.79	23.09	23.44	22.23	22.64	23.02	21.62	20.88	21.26	21.82	18.3
AL9A1_HUMAN	P49189	4-trimethylaminobutyraldehyde dehydrogenase	2	0.0158842	0.92674	0.947759	19.88	20.01	20	18.14	20.27	18.44	20.29	18.1	19.2	19.27	21.03	15.86	17.02	16.19	21.27	20.29	18.71	20.7	16.77	18.54	18.08	20.57	20	21.39	21.47	21.11	21.85	18.46	18.14	15.81	20.47	20.9	21.5	18.33	21.41	21.92	22.36
ALBU_HUMAN	Q9P157	Serum albumin	47	0.153485	0.37147	0.524926	24.29	24.86	24.3	24.17	24.79	24.92	25.17	25.08	25.04	25.54	24.5	25.29	25.44	23.59	24.11	23.01	21.96	23.76	25.45	24.49	23.25	22.26	22.7	21.89	22.2	23.72	22.59	24.46	24.93	25.54	24.16	23.89	23.51	24.04	26.25	24.19	22.13
ALDOA_HUMAN	P04075	Fructose-bisphosphate aldolase A	13	0.0356555	0.836441	0.890289	23.18	23.5	23.58	22.39	22.71	22.49	22.93	22.84	22.72	22.74	22.38	23.31	22.98	21.75	23.66	22.67	23.13	22.91	22.2	22.87	22.64	23.56	22.94	23.43	23.5	24.07	22.98	22.72	23.12	23.03	22.6	22.43	22.32	23.03	22.82	22.72	19.93
AMY1_HUMAN	P04745	Alpha-amylase 1	60	0.0381988	0.824948	0.88758	26.89	26.74	26.5	26.54	26.4	27.18	26.66	26.08	26.35	27.26	27.53	26.78	26.07	25.74	26.15	27.28	26.29	26.97	27.43	25.56	27.19	24.82	23.92	25.34	24.64	25.24	24.93	26.74	26.54	27.46	25.25	25.54	25.43	25.02	24.21	24.79	19.93
AMY2B_HUMAN	P19961	Alpha-amylase 2B	42	-0.0227378	0.895278	0.926487	27.18	26.91	27.16	26.73	26.65	27.42	26.88	26.44	26.76	27.47	27.71	26.89	26.03	26.12	26.34	27.35	26.77	27.31	27.76	26.14	27.48	25.86	24.28	26.29	25.21	26.17	25.33	27.04	26.85	27.72	25.93	26.49	25.65	25.37	24.85	25.28	21.97
AMYP_HUMAN	P04746	Pancreatic alpha-amylase	37	-0.0671249	0.697295	0.800598	27.06	26.73	27.13	26.57	26.62	27.36	26.79	26.38	26.64	27.3	27.55	26.82	25.84	26.49	26.64	27.24	26.69	27.25	27.71	26.19	27.3	25.79	24.7	26.14	25.02	26.21	25.01	26.92	26.66	27.57	25.76	26.24	25.62	25.1	24.72	25.14	21.21
ANXA1_HUMAN	P04083	Annexin A1	42	0.356282	0.0329418	0.109249	24.2	25.41	25.18	23.73	24.8	25	25.24	24.58	25	24.25	25.32	25.12	25.25	25.4	24.49	24.8	25.32	25.15	24.83	24.6	24.28	24.33	24.41	24.12	24.94	24.46	24.04	24.8	24.99	24.37	24.54	24.01	24.54	24.09	25.36	25.05	20.69
ANXA2_HUMAN	P07355	Annexin A2	24	0.301272	0.0741663	0.174344	23.5	23.55	23.17	23.14	23.29	23.05	23.88	23.21	23.8	22.73	23.57	23.88	24.04	23.63	22.42	23.44	24.33	24.25	23.29	22.78	23.37	23.67	23.39	22.61	22.63	23.95	24.07	23.88	23.35	22.3	23.69	23.64	23.67	22.99	23.22	23.59	21.8
ANXA3_HUMAN	P12429	Annexin A3	8	0.420036	0.0107579	0.0654457	22.42	22.18	22.35	17.33	15.85	20.43	17.49	19.82	20.37	21.86	15.93	21.55	21.95	16.63	18.03	15.24	15.08	16.53	14.74	13.84	12.77	13.62	13.36	13.57	14.02	16.51	16.17	13.09	14.86	13.58	14.6	19.95	15.11	16.62	21.83	16.58	25.08
ANXA5_HUMAN	P08758	Annexin A5	4	0.280388	0.0976467	0.21336	20.61	19.75	20.58	14.52	13.08	15.73	15.8	19.03	14.87	16.8	13.42	19.37	18.59	14.8	15.9	16.55	16.83	19.86	17.61	13.8	16	14.54	12.83	14.85	13.03	13.8	18.11	13.83	11.42	16.52	14.03	18.71	19.64	16.29	19.41	21.44	19.35
ANXA8_HUMAN	P13928	Annexin A8	4	0.0595741	0.729992	0.8229	16.53	18.67	19.91	18.13	19.55	19.42	19.65	18.71	21.36	19.63	18.36	19.38	21.42	18.9	17.38	19.81	18.17	19.66	18.73	19.44	18.37	18.57	20.55	19.69	19.77	21.12	21.67	20.24	19.97	16.72	19.35	20.36	20.21	17.16	20.66	20.87	24.36
APOA1_HUMAN	P02647	Apolipoprotein A-I	16	0.24219	0.154694	0.276002	20.99	21.2	21.89	17.62	20.97	18.42	20.36	20.98	21.11	23.34	22.04	22.85	22.63	20.75	19.97	17.15	18.38	20	22.56	23.2	22.02	16.02	18.08	18.07	16.54	17.92	18.9	19.85	20.07	23.68	20.91	20.05	20.99	20.85	23.12	22.15	21.77
APOA2_HUMAN	P02652	Apolipoprotein A-II	2	0.229619	0.177924	0.297139	18.67	20.62	17.77	16.52	20.49	21.55	18.97	17.69	16.36	22.68	19.06	17.69	22.27	18.76	19.47	20.05	18.59	18.93	16.12	20.19	20.24	16.84	12.72	14.75	15.45	15.08	15.35	20.11	18.4	22.7	19.99	20.76	13.97	21.87	22.43	16.74	16.04
ARF1_HUMAN	P84077	ADP-ribosylation factor 1	3	0.131514	0.444531	0.596425	21.44	20.53	20.45	17.79	17.49	19.46	19.94	20.61	17.74	21.36	18.76	20.57	21.65	16.79	22	19.79	21.75	21.16	16.91	18.11	23.07	18.72	18.21	15.37	18.17	20.89	20.09	19.94	19.26	17.76	17.02	17.99	20.71	16.7	20.78	20.73	19.74
ARF3_HUMAN	P61204	ADP-ribosylation factor 3	3	0.131514	0.444531	0.596425	21.44	20.53	20.45	17.79	17.49	19.46	19.94	20.61	17.74	21.36	18.76	20.57	21.65	16.79	22	19.79	21.75	21.16	16.91	18.11	23.07	18.72	18.21	15.37	18.17	20.89	20.09	19.94	19.26	17.76	17.02	17.99	20.71	16.7	20.78	20.73	19.87
ARP2_HUMAN	P61160	Actin-related protein 2	5	0.437989	0.00754754	0.0555375	19.08	18.57	20.37	19.36	18.56	18.35	18.84	20.43	18.94	20.12	18.87	19.48	20.47	17.79	20.47	19.62	20.12	20.67	17.41	13.95	16.7	17.38	19.33	18.05	18.19	17.76	20.72	18.54	18.23	17.98	15.34	18.18	19.77	19.22	19	19.67	23.67
ARP3_HUMAN	P61158	Actin-related protein 3	4	0.623326	4.89e-05	0.00704821	21.06	21.92	20.55	17.5	20.35	17.46	18.81	17.55	20.95	19.31	19.55	21.21	19.39	18.03	20.9	20.52	20.75	20.77	17.37	16.97	16.78	18.5	20.17	20.16	19.17	19.76	21.1	19.97	18.78	15.1	18.38	19.72	20.71	20.3	20.49	20.35	21.53
ARPC3_HUMAN	O15145	Actin-related protein 2/3 complex subunit 3	2	0.475052	0.00341424	0.0332051	22.11	21.93	20.79	22.43	19.27	18.31	18.41	19.67	21.75	21.43	21.44	21.25	21.67	15.01	21.56	19.86	21.75	21.49	18.82	17.92	16.84	18.4	19.68	21.39	21.61	21.04	21.54	19.5	20.86	19.22	18.43	20.72	21.33	21.53	19.42	21.77	18.82
ARPC4_HUMAN	P59998	Actin-related protein 2/3 complex subunit 4	2	0.506544	0.00161937	0.0223113	22.44	21.27	21.12	20.95	20.32	20.37	20.39	19.51	21.92	21.99	21.01	21.46	21.96	19.88	21.3	21.32	21.31	21.34	18.74	19.56	18.41	20.63	20.12	21.19	21.41	21.25	21.85	20.62	21.07	18.76	20.74	18.5	21.72	20.32	21.4	21.9	22.61
ATPA_HUMAN	P25705	ATP synthase subunit alpha, mitochondrial	7	0.231614	0.174082	0.295901	21.42	21.51	21.77	20.52	20.64	20.55	20.57	19.91	21.21	20.54	21.29	21.27	21.22	18.74	21.36	21.29	20.28	20.6	19.91	20.96	19.83	20.82	21.19	21.77	21.35	21.8	21.98	21.02	21.01	18.35	20.75	20.78	20.54	20.01	21.26	20.68	21.35
ATPB_HUMAN	P06576	ATP synthase subunit beta, mitochondrial	10	0.123919	0.47149	0.625292	22.25	22.21	22.15	21.18	21.1	21.41	21.45	21.17	21.97	21.5	22.07	21.27	21.75	20.67	21.74	22.14	21.18	21.66	21.11	21.67	21.09	21.78	21.87	22.7	22.4	22.48	22.58	21.88	21.92	20.13	21.63	21.93	21.45	21.1	21.43	21.57	21.58
AXA2L_HUMAN	A6NMY6	Putative annexin A2-like protein	18	0.301788	0.073648	0.174344	23.75	23.69	23.39	23.46	23.46	23.19	23.99	23.36	24.03	23.01	23.79	24.04	24.3	23.67	22.54	23.65	24.47	24.46	23.48	23.02	23.5	23.8	23.54	22.68	22.92	24.06	24.23	24.06	23.51	22.59	23.95	23.93	23.94	23.06	23.27	23.89	25.44
AXA81_HUMAN	Q5T2P8	Annexin A8-like protein 1	4	0.0595741	0.729992	0.8229	16.53	18.67	19.91	18.13	19.55	19.42	19.65	18.71	21.36	19.63	18.36	19.38	21.42	18.9	17.38	19.81	18.17	19.66	18.73	19.44	18.37	18.57	20.55	19.69	19.77	21.12	21.67	20.24	19.97	16.72	19.35	20.36	20.21	17.16	20.66	20.87	21.11
AXA82_HUMAN	Q5VT79	Annexin A8-like protein 2	4	0.0595741	0.729992	0.8229	16.53	18.67	19.91	18.13	19.55	19.42	19.65	18.71	21.36	19.63	18.36	19.38	21.42	18.9	17.38	19.81	18.17	19.66	18.73	19.44	18.37	18.57	20.55	19.69	19.77	21.12	21.67	20.24	19.97	16.72	19.35	20.36	20.21	17.16	20.66	20.87	26.37
B2MG_HUMAN	P61769	Beta-2-microglobulin	2	0.11592	0.500787	0.648539	23.86	22.84	23.43	20.85	19.39	23.37	23.41	21.81	18.83	23.09	20.52	22.68	23.16	15.63	23.6	11.27	21.32	22.89	20.33	16.14	23.31	19.46	20.18	20.53	20.13	19.02	19.51	18.52	18.46	19.68	20.02	18.96	23.85	24.3	24.93	22.55	26.01
BPIL1_HUMAN	Q8N4F0	Bactericidal/permeability-increasing protein-like 1	14	0.0616106	0.721124	0.822247	23.52	20.4	20.76	21.9	22.32	22.13	21.87	22.92	22	22.34	22.15	22.33	22.45	21.28	22.82	21.46	20.81	22.59	20.52	21.27	22.88	21.6	20.98	21.63	19.67	20.79	20.17	21.94	21.05	21.6	20.52	21.08	20.77	21.3	21.28	22.54	24.71
BPI_HUMAN	Q9H203	Bactericidal permeability-increasing protein	4	0.0696848	0.686327	0.79167	22.92	22.28	20.12	13.25	17.36	16.56	17.62	17.3	18.65	17.04	9.82	11.73	14.87	14.02	19.49	7.07	12.84	8.16	11.48	14.42	15.71	11.85	11.15	13.79	8.48	13.08	18.51	9.09	14.11	14.68	18.36	18.12	21.18	21.11	22.22	18.89	19.67
CAH6_HUMAN	P23280	Carbonic anhydrase 6	12	-0.170209	0.320964	0.46823	23	22.66	22.99	24.42	24.53	23.92	24.84	24.68	25.07	24.47	24.78	24.07	23.75	24.67	24.3	24.41	24.13	24.25	24.47	24.38	24.36	24.21	23.57	24.3	23.07	23.81	22.25	24.43	25.13	25.09	22.09	24.22	23.62	23.47	19.98	22.98	21.58
CALL3_HUMAN	P27482	Calmodulin-like protein 3	4	0.0408008	0.813228	0.88665	23.13	22.52	23.23	23.05	21.06	22.38	22.65	22.66	22.39	22.74	20.59	22.16	23.11	21.43	23.88	22.88	21	22.08	20.8	20.28	20.93	22.24	23.81	23.15	20.02	21.44	22.79	22.98	21.85	20.43	22.88	22.12	22.38	22.02	20.12	23.1	19.4
CALR_HUMAN	P27797	Calreticulin	4	0.322724	0.0548925	0.147971	21.17	21.5	22.17	19.96	21.31	19.97	21.86	20.57	20.54	21.5	21.38	21.52	20.98	19.73	21.68	21.28	21.26	21.34	21.11	19.73	20.2	21.61	20.93	21.27	19.91	21.65	20.83	20.79	21.17	19.3	19.24	19.97	21.1	20.5	21.98	20.79	21.32
CALX_HUMAN	P27824	Calnexin	5	0.743823	2.01e-07	9.96e-05	20.45	20.94	20.67	15.55	19.25	18.2	18.26	17.45	21.03	20.72	20.52	21.05	21.55	18.8	20.27	21.32	18.35	20.79	13.95	13.77	17	16.86	16.18	17.73	17.81	16.8	19.87	17.82	19.79	18.77	18.93	17.42	20.9	19.83	22.01	20.5	26.43
CAMP_HUMAN	P49913	Cathelicidin antimicrobial peptide	2	0.408502	0.01338	0.0699269	23.03	23.27	24.13	12.66	8.52	17.24	8.21	20.11	20.51	22.75	21.26	21.77	22.13	19.46	20.32	11.66	11.84	19.86	20.71	10.2	20.68	14.47	14.78	16.21	13.97	13.65	18.26	14.98	11.14	19.67	8.77	20.86	21.26	21.77	23.39	18.01	21.5
CAN1_HUMAN	P07384	Calpain-1 catalytic subunit	9	0.421806	0.0103969	0.0654457	17.24	17.54	16.1	16.21	17.59	17.76	17.55	16.75	19.69	19.3	20.56	20.53	20.12	18.17	19.95	20.88	21.15	20.17	16.62	18.08	18.19	18.15	18.73	20.51	20.62	20.52	21.39	17.62	19.17	16.8	17.84	18.19	20.4	17.04	20.66	17.89	21.5
CAP1_HUMAN	Q01518	Adenylyl cyclase-associated protein 1	5	0.42034	0.0106951	0.0654457	22.08	18.41	20.98	16.8	19.56	17.8	17.58	16.69	19.36	20.18	16.48	19.55	21.73	19.28	19.77	20.02	18.93	16.03	15.93	16.43	17.07	16.4	18.1	16.36	17.99	20.78	20.29	18.09	19.94	15.6	19.62	20.8	18.8	19.84	19.8	20.23	20.06
CAP7_HUMAN	P20160	Azurocidin	5	0.329416	0.0497755	0.138913	20.03	21.78	23.01	20.32	20.37	19.85	21.39	21.4	16.25	19.95	21.56	21.67	21.06	19.87	22.39	17.41	18.05	19.45	17	13.45	18.71	16.31	18.23	16.2	16.3	14.6	12.01	16	19.54	16.28	14.53	17.76	22.61	18.52	24.2	16.3	23.3
CAPG_HUMAN	P40121	Macrophage-capping protein	3	0.223103	0.190895	0.314565	21.59	21.28	21.5	19.51	19.65	20.09	19.15	20.11	21.08	21.97	21.29	21.64	19.14	19.14	21.21	19.11	19.93	21.08	19.17	19.93	20.64	20.52	20.18	21.68	20.59	21.32	22.07	15.75	17.97	16.69	15.92	17.27	20.95	21.24	21.85	21.16	16.58
CAPZB_HUMAN	P47756	F-actin-capping protein subunit beta	3	0.226541	0.183971	0.305183	21.53	21.72	22.08	19.15	20.37	20.4	19.41	19.35	19.4	21.56	21.6	18.67	20.97	17.89	21.59	21.11	21.45	19.66	18.66	19.49	18.99	21.08	20.04	21.51	19.66	21.09	19.99	18	18.09	18.17	18.11	19.42	20.69	19.36	22.09	21.18	17.89
CATA_HUMAN	P04040	Catalase	3	0.278961	0.0994377	0.215376	22.45	19.48	18.8	16.31	15.31	16.76	9.66	18.52	12.03	21.56	13.84	18.08	10.65	17.46	20.02	12.41	14.3	17.95	14.43	13.93	11.13	11.21	9.01	17.21	15.6	14.2	15.15	11.57	18.19	19.76	12.43	11.7	17.52	21.22	19.72	13.69	20.23
CATD_HUMAN	P07339	Cathepsin D	3	0.25504	0.133308	0.250457	20.76	17.54	15.85	17.74	18.5	19.56	19.32	13.83	22.28	21.5	21.68	21.79	18.13	19.28	22.21	17.04	9.38	18.4	15.06	17.35	20.28	18.27	17.62	13.55	17.39	18.44	18.98	19.38	19.88	17.95	18.49	18.8	17.6	21.41	20.86	19.14	22.13
CATG_HUMAN	P08311	Cathepsin G	10	0.391704	0.0181493	0.0829451	23.13	22.51	22.38	18.61	20.71	22	21.03	21.31	21.96	22.65	21.83	21.72	21	20.88	21.09	21.03	17.85	19.21	17.01	15.77	21.56	14.52	15.71	17.15	15.56	17.46	15.24	15.81	16.94	18.5	18.25	20.22	22.72	20.89	24.52	21.79	21.29
CAZA1_HUMAN	P52907	F-actin-capping protein subunit alpha-1	2	0.323338	0.0544059	0.147461	22.37	22.47	23.22	21.27	21.73	20.5	22.28	22.15	22.22	21.34	22.01	22.21	22.39	22.32	22.25	21.27	21.89	22.04	21.11	21.75	21.48	22.06	21.97	22.34	22.37	22.48	22.69	22.11	21.73	20.41	21.46	22.19	21.24	21.92	22.54	21.43	21.28
CBR1_HUMAN	P16152	Carbonyl reductase [NADPH] 1	5	0.599248	0.000112565	0.00841373	20.39	20.19	19.15	18.76	17.18	18.64	19	18.04	21.16	18.55	22.09	21.21	21.9	19.04	20.11	21.34	20.7	22.22	19.28	18.56	17	20.91	20.02	20.75	21.88	19.33	21.89	20.94	21.3	16.17	19.8	19.38	21.64	20.39	20.29	19.07	21.77
CBR3_HUMAN	O75828	Carbonyl reductase [NADPH] 3	2	0.364238	0.0289667	0.105692	19.63	17.86	19.01	18.61	20.47	18.61	18.34	17.56	20.53	18.07	21.26	21.74	22	19.72	14.92	21.89	18.82	18.82	20.35	19.77	15.16	20.68	19.81	21.61	17.77	19.87	21.56	19.56	20.07	15.41	19.64	21.62	21.8	18.18	19.42	19.41	21.69
CD040_HUMAN	Q6MZM9	Uncharacterized protein C4orf40	3	0.139708	0.416413	0.576929	18.82	14.16	15.12	20.07	19.25	17.18	22.1	20.58	23.51	21.53	25.15	18.98	21.75	20.85	22.77	19.78	23.26	23.59	21.73	20.49	23.23	22.08	19.2	23.44	14.79	17.68	18.66	23.34	20.21	23.51	22.27	17.54	23.95	24.06	20.69	23.7	22.8
CDC42_HUMAN	P60953	Cell division control protein 42 homolog	2	0.196901	0.249723	0.387071	19.7	20.31	19.57	13.94	17.62	14.38	21.07	13.71	14.51	18.28	18.73	14.41	23.4	14.39	15.81	11.77	21.34	14.94	15.59	17.54	14.6	18.67	15.99	19.09	16.49	16.49	15.16	17.85	15.62	15.95	15.55	13.4	20.2	18.22	19.75	20.24	23.8
CEAM5_HUMAN	P06731	Carcinoembryonic antigen-related cell adhesion molecule 5	2	0.272195	0.108269	0.222828	23.92	21.91	22.4	21.12	22.49	22.58	22.33	21.98	22.96	22.29	22.29	23.38	23.11	22.68	22.44	22.89	22.73	22.49	21.95	21.2	23.89	23.05	22.8	22.13	22.75	22.7	22.97	21.92	22.22	20.73	22.03	22.06	22.57	22.32	23.5	23.07	23.8
CERU_HUMAN	P00450	Ceruloplasmin	5	0.161411	0.346975	0.497398	22.42	16.45	20.16	16.65	20.68	20.01	20.68	19.87	17.96	21.35	16.7	21.5	20.15	20.41	22.07	19.09	18.68	19.45	16.98	17.95	21.52	15.89	15.22	17.17	14.23	14.86	16.19	15.45	15.8	19.91	20.37	15.8	14.87	20.7	20.94	16.81	21.95
CF058_HUMAN	Q6P5S2	UPF0762 protein C6orf58	8	0.247267	0.145966	0.263269	24.24	20.39	21.47	21.43	20.52	20.75	20.28	20.22	23.71	22.79	19.95	21.37	21.79	21.53	21.12	19.04	20.52	21.4	19.1	18.5	19.92	20.39	21.56	18.09	18.54	21.28	19.88	20.19	21.12	21.39	16.53	19.64	21.74	21.2	20.15	22.66	25.48
CFAB_HUMAN	Q9BX92	Complement factor B	2	0.244266	0.151081	0.271396	20.47	14.13	16.07	13.84	11.04	17.1	16.63	15.39	4.98	20.1	21.79	20.63	21.21	16.32	18.92	16.61	12.15	15	14.07	12.61	19.98	13.89	10.34	13.77	11.46	16.35	9.57	11.22	12.5	15.01	14.85	12.25	17.2	20.43	16.83	13.31	22.35
CH60_HUMAN	P10809	60 kDa heat shock protein, mitochondrial	4	0.241519	0.155875	0.276048	19.95	20.77	18.65	17.54	19.59	19.32	20.84	20.01	20.66	18.88	21.12	19.13	18.55	18.49	21.2	20.85	18.41	21.13	17.8	16.48	18.5	19.29	17.57	20.9	21.31	20.97	19.04	17.35	18.57	17.18	19.64	18.06	18.34	18.28	20.5	17.61	23.04
CKAP4_HUMAN	Q07065	Cytoskeleton-associated protein 4	2	0.187982	0.272243	0.410433	19.83	19.63	19.53	14.49	16.73	16.72	25.97	16.06	20.89	17.36	20.93	17.8	20.63	20.53	17.23	20.67	20.49	21.32	16.71	19.06	14.76	19.26	19.55	20.52	20.45	20.2	21.32	19.95	20.63	13.57	19.47	19.68	18.46	14.77	18.64	16.87	23.04
CLCA4_HUMAN	Q14CN2	Calcium-activated chloride channel regulator 4	2	0.395121	0.0170783	0.0812406	18.05	18.66	16.3	17.9	19.67	19.69	20.05	19.58	21.9	20.71	21.24	20.71	17.44	17.01	20.16	19.05	20.17	20.99	18.3	18.09	19.51	19.15	16.95	20.3	16.24	15.81	18.73	20.16	18.72	16.92	18.63	20.68	17.57	20.21	18.97	20.02	18.01
CLH1_HUMAN	Q00610	Clathrin heavy chain 1	13	0.277495	0.101303	0.216579	19.21	17.18	17.73	15.41	19.31	19.2	18.63	17.14	19.96	17.93	18.35	19.21	18.68	17.15	18.92	19.9	19.5	20.44	16.06	17.21	16.69	18.52	19.36	20.39	20.5	20.7	19.53	18.45	19.83	16.14	18.39	18.49	19.57	16.92	19.94	18.58	20.05
CLH2_HUMAN	P53675	Clathrin heavy chain 2	5	0.195301	0.253669	0.390744	19.31	16.62	16.41	15.42	18.66	18.69	17.99	15.68	19.31	16.67	16.16	18.15	18.94	14.98	18.48	20.15	19.28	20.32	14.61	16.44	17.11	17.66	19.07	19.28	19.68	20.24	17.58	17.74	19.14	17.14	17.7	18.36	18.69	17.17	19.3	18.21	20.05
CLIC1_HUMAN	O00299	Chloride intracellular channel protein 1	3	0.254317	0.134449	0.251649	18.95	21.55	21.84	19.19	18.44	18.9	21.41	20.16	20.04	19.94	21.14	19.21	23.06	19.11	21.54	21.1	21.53	21.88	21.31	20.36	19.05	20.31	20.51	21.09	21.84	19.43	20.37	20.43	20.86	18.2	20.13	18.18	21.19	19.31	22.45	19.54	20.05
CLIC3_HUMAN	O95833	Chloride intracellular channel protein 3	3	0.259532	0.126372	0.242009	18.95	18.6	17.41	18.53	20.13	20.03	20.83	15.75	19.95	18.86	21.49	20.71	20.98	19.01	19.7	21.07	21.3	20.9	20.55	19.42	17.57	20.27	20.3	20.99	20.72	21.06	20.69	19.22	21.02	16.8	17.1	16.34	20.68	21.73	18.63	17.6	20.05
CLUS_HUMAN	P10909	Clusterin	6	0.0321323	0.852415	0.896943	23.37	17.56	18.53	18.92	19.72	20.08	19.21	20.77	22.38	21.47	20.35	22.48	22.41	20.97	18.35	19.63	15.98	16.27	21.35	20.47	24.48	22.87	20.48	17	18.48	20.11	18.39	19.07	19	21.96	19.56	21.72	19	22.52	22.6	20.47	20.74
CO3_HUMAN	P01024	Complement C3	22	0.380466	0.0220746	0.0912674	21.77	18.11	18.97	17.54	19.16	19.42	17.29	19.01	19.73	22.4	19.1	22.29	21.99	18.7	18.89	16.14	17.14	18.17	17.49	17.62	20.48	13.52	14.37	15.28	14.44	15.49	16.94	16.32	17.3	21.32	17.12	17.7	18.04	19.81	21.93	18.57	21.5
CO4A_HUMAN	Q5JQM8	Complement C4-A	4	0.263204	0.120906	0.235174	20.85	19.33	20.69	16.07	20.27	17.72	15.74	19.74	18.31	21.54	12.59	18.48	19.35	14.4	11.01	12.64	11.9	17.24	12.75	15.81	19.3	13.99	10.14	9.69	13.23	9.37	11.59	12.43	12.46	13.93	12.17	12.63	14.98	20.47	20.68	11.67	20.71
CO4B_HUMAN	Q9UIP5	Complement C4-B	4	0.263204	0.120906	0.235174	20.85	19.33	20.69	16.07	20.27	17.72	15.74	19.74	18.31	21.54	12.59	18.48	19.35	14.4	11.01	12.64	11.9	17.24	12.75	15.81	19.3	13.99	10.14	9.69	13.23	9.37	11.59	12.43	12.46	13.93	12.17	12.63	14.98	20.47	20.68	11.67	20.02
COF1_HUMAN	P23528	Cofilin-1	7	0.135687	0.430084	0.586305	22.82	22.57	23.5	22.28	22.92	22.46	22.98	22.93	22.54	22.64	22.43	22.97	22.94	22.45	22.82	22.96	23.01	21.86	21.31	22.27	22.09	22.4	22.78	22.96	22.72	23.28	22.88	22.38	22.55	22.09	21.09	21.49	22.95	22.49	22.11	22.61	17.8
COF2_HUMAN	Q9Y281	Cofilin-2	4	0.185773	0.27802	0.415355	22.75	22.44	22.87	21.73	22.35	21.9	22.54	22.44	22.45	22.55	22.07	22.71	22.67	22.18	22.23	22.52	22.63	21	20.99	21.64	22.1	22.22	22.3	22.47	22.44	22.77	22.5	21.83	22.07	21.73	21.32	20.56	22.73	21.79	22.34	22.39	20.35
COR1A_HUMAN	P31146	Coronin-1A	9	0.395313	0.0170196	0.0812406	22.26	21.85	21.81	14.6	17.22	17.58	16.75	19.95	18.59	22.21	14.72	21.31	21.38	15.13	19.36	14.47	15.85	12.63	12.61	11.07	20.52	12.97	14.6	12.76	15.59	9.66	13.87	12.78	11.2	12.61	14.18	16.59	20.68	20.54	20.99	17.8	22.71
CRIS3_HUMAN	P54108	Cysteine-rich secretory protein 3	5	-0.0295396	0.864208	0.902415	23.34	22.78	21.67	21.46	22.4	22.47	21.81	22.6	21.67	21.67	23.33	21.87	20.58	24.2	23.26	21.68	21.4	22.64	22.57	22.3	22.38	21.66	19.99	22.37	23.31	22.13	18.66	19.3	22.1	22.61	19.93	17.87	23.37	21.68	22.52	22.63	26.33
CRNN_HUMAN	Q9UBG3	Cornulin	18	0.0229245	0.894423	0.926487	23.88	23.77	23.62	22.79	23.17	22.6	23.87	22.83	24.22	22.84	23.28	24.22	24.05	23.53	22.54	22.71	23.27	22.45	23.93	23.78	23.22	23.69	24.35	23.21	23.5	24.1	24.56	24.19	23.6	23.22	23.52	23.64	24.03	22.85	23.62	24.46	21.9
CRYAB_HUMAN	P02511	Alpha-crystallin B chain	5	0.466141	0.00416467	0.03672	19.37	18.49	19.91	15.3	18.27	16.05	20	19.8	21.77	17.22	21.19	20.24	20.09	18.94	20.24	18	21.9	21.4	19.26	15.84	16.09	20.35	18.12	20.65	19.24	19.87	21.01	18.87	20.86	18.03	17.8	19.96	21.27	16.83	20.83	19.87	21.79
CTNB1_HUMAN	P35222	Catenin beta-1	2	-0.0365448	0.832418	0.889686	22.09	22.86	22.83	18.54	21.1	22.02	21.63	19.76	17.68	17.7	18.33	17.81	17.82	21.27	19.08	19.92	18.58	19.88	20.92	17.29	20.77	20.37	18.6	17.36	20.95	17.68	25.51	17.67	17.46	18.17	19.84	22.28	25.5	22.14	22.97	21.81	22.87
CYC_HUMAN	P99999	Cytochrome c	5	-0.137543	0.423742	0.582205	25.29	23.83	23.97	25.41	25.29	24.77	24.12	24.85	22.52	22.56	22.99	24.63	24.57	21.42	22.55	24.8	24.75	24.7	23.32	24.78	21.67	23.54	26.06	24.2	21.65	24.68	23.49	22.21	23.17	23.18	19.92	21.58	24.06	21.35	23.62	24.61	22.95
CYTA_HUMAN	P01040	Cystatin-A	4	0.109586	0.524625	0.665508	24.77	23.11	24.45	22.25	20.15	23.16	23.03	23.37	20.63	23.66	18.99	23.22	23.22	19.66	22.46	23.13	20.99	20.35	21.18	16.29	21.3	22.21	20.6	22.65	19.29	19.89	21.29	20.07	19.19	17.56	21.51	20.81	22.39	19.34	22.09	23.07	22.26
CYTB_HUMAN	P04080	Cystatin-B	10	-0.0544982	0.752243	0.834703	25.17	26.06	26.09	23.9	25.13	25.01	25.37	25.28	25.12	25.14	24.61	25.26	24.51	26.93	25.54	24.67	25.22	25.59	25.84	26.03	25.26	24.65	25.06	24.69	25.94	25.18	24.2	24.7	24.2	24.54	23.57	25.32	25.04	23.96	26.75	25.43	22.34
CYTC_HUMAN	P01034	Cystatin-C	7	-0.0435661	0.800816	0.88072	22.19	20.45	25.66	22.14	20.67	21.58	23.28	23.68	22.36	21.11	22.38	20.09	20.25	23.92	22.35	21.74	21.63	19.2	21.34	20.14	22.07	21.95	20.21	20.76	21.38	21.31	20.81	21.78	17.51	19.32	20.35	20.92	20.49	23	21.57	20.37	23.27
CYTD_HUMAN	P28325	Cystatin-D	6	0.00398584	0.981594	0.985568	21.82	20.25	19.94	23.88	29.45	24.43	24.85	24.79	23.97	25.53	25.84	22.22	24.62	22.68	24.2	24.35	20.56	21.16	20.87	17.33	25.04	20.35	24.09	23.1	22.75	21.39	23.4	20.9	21.95	25.05	21.7	20.98	23.98	23.49	22.33	24.6	21.41
CYTN_HUMAN	P01037	Cystatin-SN	13	-0.237552	0.162994	0.285672	25.75	25.69	25.68	25.19	25.17	25.74	26.75	26.83	23.95	23.98	26.29	23.85	24.54	25.61	22.35	22.74	22.28	22.58	25.78	22.52	25.06	24.09	23.82	24.31	24.1	26.89	21.23	25.46	23.85	26.43	23.63	24.77	26.15	24.53	24.68	25.26	20.4
CYTS_HUMAN	P01036	Cystatin-S	15	0.0992932	0.564507	0.693902	27.03	26.52	26.59	25.32	24.89	25.13	25.43	27.51	25.55	25.39	27.16	25.81	25.87	26.43	23.37	25.89	24.04	24.19	25.19	24.41	25.62	24.04	25.23	24.18	25.16	25.64	23.46	26.62	24.04	26.08	25.21	24.39	25.84	24.24	24.76	24.89	21.89
CYTT_HUMAN	P09228	Cystatin-SA	8	-0.0388458	0.822031	0.88665	26.84	25.68	25.76	25.41	24.26	24.73	25.84	26.06	24.18	23.95	25.52	24.17	24.65	24.81	21.31	22.16	22.81	22.38	24.63	21.3	23.68	23.87	23.99	21.76	23.55	25.76	22.42	25.48	23.25	25.83	25.76	24.31	25.42	24.01	24.08	25.28	21.02
DESM_HUMAN	Q8TD99	Desmin	2	0.564672	0.000333735	0.00911802	24.01	23.26	23.69	10.63	17.99	20.36	9.18	20.86	27.25	22.7	19.2	22.24	20.55	9.69	16.35	4.97	17.84	9.5	9.38	2.78	4.96	18.14	13.48	10.01	15.59	10.35	13.63	15.52	28.75	7.18	14.09	16.73	20.73	18.16	21.3	20.52	22.02
DESP_HUMAN	P15924	Desmoplakin	138	0.205482	0.229262	0.359855	21.5	22.11	21.94	20.93	21.8	21.78	22.39	21.14	22.15	19.76	22.58	22.09	22.67	21.53	22.11	22.31	22.89	23.13	21.52	21.54	21.1	22.17	22.02	22.45	22.88	22.72	22.61	22.06	22.62	19.33	20.73	20.92	22.64	20.53	22.93	22.16	13.57
DMBT1_HUMAN	Q9Y4V9	Deleted in malignant brain tumors 1 protein	9	-0.294577	0.0811562	0.185408	24.12	22.25	23.1	24.22	23.08	23.31	22.58	22.5	23.43	24.55	23.93	24.2	24.02	22.55	24.23	24.86	23.95	23.84	25.49	24.43	27	25.69	24.5	23.47	24.22	23.93	24.35	23.74	24.17	24.55	23.24	22.61	23.86	23.02	22.63	24.48	22.73
DSC2_HUMAN	Q02487	Desmocollin-2	6	0.261188	0.123885	0.239295	21.66	21.3	20.09	19.87	22.2	21.78	20.44	21.58	22.38	21.2	19.51	21.66	22.34	20.02	23.16	21.76	22.5	22.84	20.17	19.75	20.7	21.78	20.5	21.41	21.95	22.22	22.9	18.96	20.83	19.09	21.55	22.39	22.77	21.09	22.19	22.21	18.57
DSG1_HUMAN	Q02413	Desmoglein-1	10	0.131552	0.444397	0.596425	20.74	17.33	16.81	15.87	19.78	18.53	19.71	17.64	19.55	15.86	19.15	19.48	20.01	20.35	21.51	17.04	21.44	20.71	18.06	16.64	16.57	19.62	19.39	18.74	21.31	20.57	21.55	16.63	18.93	14.89	16.35	19.7	22.21	15.21	19.19	20.05	22.08
DSG3_HUMAN	P32926	Desmoglein-3	7	-0.111904	0.515839	0.65791	20.06	22.39	22.17	20.71	22.44	21.63	21.79	22	20.32	21.08	21.69	21.05	21.03	21.96	23.53	21.87	22.54	22.99	20.44	21.91	22.19	22.11	20.2	22.01	22.63	21.97	21.21	19.77	21.3	22.33	20.57	21.03	21.72	20.39	22.05	21.01	19.51
DYL1_HUMAN	P63167	Dynein light chain 1, cytoplasmic	3	0.257409	0.129616	0.246321	21	21.51	19.9	19.14	20.44	20.73	20.57	20.14	21.25	18.8	22.15	20.66	21.9	19.89	21.35	21.57	22.24	21.78	14.07	20.33	18.48	21.01	20.23	21.33	21.31	21.88	20.16	20.79	21.65	17.85	15.61	18.42	22.02	16.54	21.3	21.86	19.9
ECM1_HUMAN	Q8IZ60	Extracellular matrix protein 1	4	0.361438	0.0303181	0.105692	24.42	16.51	14	13.88	20.54	16.76	19.14	16.69	21.3	14.59	18.41	19.59	19.27	20.01	19.22	19.56	21.51	20.97	19.15	17.48	15.16	20.17	18.38	18.41	21.46	15.87	18.44	17.56	17.15	14.89	19.05	19.02	20.29	18.49	22	20.66	24.97
EF1A1_HUMAN	P68104	Elongation factor 1-alpha 1	16	0.416537	0.0115027	0.0668285	23.77	23.56	22.81	22.82	23.24	22.68	23.72	23.38	23.08	23.04	24.12	24.03	24.13	23.19	22.97	23.91	24.31	24.19	23.34	23.73	23.92	23.6	23.1	23.15	23.95	23.65	23.66	23.45	23.54	22.56	23.73	24.41	24.02	23.56	23.99	23.8	17.26
EF1A2_HUMAN	Q05639	Elongation factor 1-alpha 2	9	0.243985	0.151566	0.271396	24.06	23.82	23.06	23.76	23.65	23.39	23.85	23.57	23.41	23.04	24.46	24.46	24.53	23.14	22.89	24.33	24.8	24.7	23.73	24.21	24.13	24.64	23.91	24.4	24.81	23.43	24.84	24.11	24.12	23.72	24.56	24.8	24.46	24.25	23.95	24.58	17.26
EF1A3_HUMAN	Q5VTE0	Putative elongation factor 1-alpha-like 3	16	0.416537	0.0115027	0.0668285	23.77	23.56	22.81	22.82	23.24	22.68	23.72	23.38	23.08	23.04	24.12	24.03	24.13	23.19	22.97	23.91	24.31	24.19	23.34	23.73	23.92	23.6	23.1	23.15	23.95	23.65	23.66	23.45	23.54	22.56	23.73	24.41	24.02	23.56	23.99	23.8	19.99
EF1G_HUMAN	P26641	Elongation factor 1-gamma	4	0.478787	0.00313644	0.0327263	21.56	21.7	20.84	19.18	19.95	20.7	20.87	20.05	21.93	21.06	22.03	21.74	22.02	19.63	21.37	22.02	22.05	21.92	20.25	20.56	20.37	21.26	21.05	22.03	22.17	21.86	22.72	21.33	21.9	19.24	21.58	20.68	21.84	20.53	21.8	21.8	20.62
EF2_HUMAN	P13639	Elongation factor 2	23	0.363424	0.0293545	0.105692	21.56	20.65	20.21	19.7	21.37	20.6	21.24	19.89	21.27	20.14	21.69	21.7	22.1	20.49	21.44	22.04	21.88	22.03	20.23	19.5	20.25	20.86	21.3	21.29	21.92	21.68	22.47	21.28	21.73	17.61	20.36	20.3	21.77	19.66	21.59	21.57	17.22
ELNE_HUMAN	P08246	Neutrophil elastase	9	0.379287	0.0225247	0.092215	22.69	22.16	23.81	11.28	18.96	21.46	20.23	21.47	16.1	23.54	19.16	19.75	21.26	16.13	17.45	15.19	12.34	15.52	11.47	10.76	19.57	12.6	12.58	10	13.69	11.11	12.68	9.91	13.11	12.43	14.3	16.81	16.88	22.06	23.27	19.51	18.65
ENOA_HUMAN	Q6GMP2	Alpha-enolase	24	0.122018	0.47837	0.629367	22.89	22.2	22.82	22.72	23.21	22.44	23.21	23.07	22.28	23.02	22.49	23.24	23.18	21.61	23.95	23.09	23.16	23.17	21.64	22.64	21.81	23.21	22.71	22.89	23.18	23.71	23.32	22.4	22.46	22.71	21.45	21.81	22.8	22.8	23.13	23.18	24.72
ENPL_HUMAN	P14625	Endoplasmin	2	0.160691	0.349159	0.499086	20.32	22.77	17.24	17.59	19.26	19.94	20.95	19.53	21.91	20.03	22.27	18.55	22.54	21.86	18.61	15.2	14.57	22.54	20.39	17.52	15.48	21.63	16.85	18.05	19.39	20.57	23.35	18.55	22.19	15.62	21.32	19.46	18.71	15.9	21.02	24.45	19.41
ERO1A_HUMAN	Q96HE7	ERO1-like protein alpha	3	0.27495	0.104604	0.220073	21.82	20.88	20.72	19.51	20.81	20.02	20.82	20.01	22.02	21.39	21.51	21.71	19.72	20.01	19.58	20.77	20.63	20.59	21.3	18.27	21.48	20.51	19.26	21.88	22.54	21.34	23.09	21.69	20.95	20.21	21.97	20.55	20.37	21.04	21.75	21.8	20.66
EVPL_HUMAN	Q92817	Envoplakin	31	0.394793	0.0171787	0.0812406	18.32	20.87	19.53	18.25	20.01	19.3	19.96	17.92	20.26	16.52	20.39	21.53	20.1	21.1	20.81	21.34	21.8	21.72	19.42	20.03	16.22	19.78	20.13	21.05	20.92	21.2	21.15	21.19	21.5	15.78	19.85	20.84	21.3	19.81	21.18	20.35	21.57
EZRI_HUMAN	P15311	Ezrin	13	0.215239	0.207419	0.332944	22.19	20.05	17.87	19.81	19.13	18.35	20.8	20.19	20.7	20.79	19.8	20.29	20.62	19.85	21.36	20.36	21.26	21.05	18.39	17.78	21.95	20.35	19.84	21.06	20.9	21.21	22.18	21.65	20.3	20.21	21.45	20.13	20.16	20.97	21.65	21.07	18.42
FABP5_HUMAN	Q01469	Fatty acid-binding protein, epidermal	4	-0.135288	0.431454	0.586305	21.93	22.96	21.83	21.57	22.43	21.3	23.36	23.27	21.79	20.24	23.32	21.3	20.7	23.95	25.84	22.49	23.7	24.46	22.84	22.67	23.87	23.85	21.96	23.22	24.64	23.77	20.48	23.07	23.68	19.11	19.94	20.4	23.94	20.07	23.32	21.99	21.15
FAM25_HUMAN	Q5VTM1	Protein FAM25	3	-0.00862669	0.960175	0.969952	21.72	20.53	19.23	21.9	21.53	18.82	21.13	19.91	19.37	18.96	20.89	18.48	20.76	22.58	22.17	18.24	20.73	21.67	18.46	21.26	20.24	21.18	18.14	22.15	21.94	22.27	22.17	17.42	22.1	19.87	19	18.06	21.48	21.99	23.56	21.98	17.84
FAS_HUMAN	Q96IT0	Fatty acid synthase	3	0.352317	0.035083	0.109249	14.72	20.33	16.25	17.43	14.53	18.76	16.62	13.48	20.96	15.46	21.17	17	20.54	18.77	17.81	17.4	20.16	20.43	16.27	13.91	15.65	15.72	14.75	20.4	19.16	20.01	19.76	12.93	20.17	15.33	13.5	15.79	19.33	17.98	17.6	19.05	22.68
FIBA_HUMAN	P02671	Fibrinogen alpha chain	2	0.334215	0.0463465	0.132878	18.23	22.17	24.11	17.45	21.68	21.23	22.08	22.63	21.99	23.26	21.25	22.86	23	22.57	19.35	19.48	21.76	21.78	21.18	15.79	21.48	17.09	16.82	16.16	20.9	18.78	17.56	22.35	14.4	22.64	21.11	21.04	20.85	21.61	22.95	20.96	16.24
FIBB_HUMAN	P02675	Fibrinogen beta chain	10	0.258037	0.12865	0.245424	20.9	20.06	22.32	18.63	21.43	20.83	21.62	22	19.45	22.59	20.15	22.45	22.31	22.32	20.14	17.9	19.97	21.88	19.54	18.07	21.37	14.2	16.84	16.15	12.85	15.52	16.25	20.65	16.09	22.09	17.64	18.73	20.6	20.17	22.46	19.28	23.62
FIBG_HUMAN	Q9UC63	Fibrinogen gamma chain	7	0.304482	0.0709874	0.172597	20.78	19.17	21.93	16.81	22.32	21.55	22.1	22.48	21.95	23.28	19.53	22.78	23.14	22.68	20.12	18.58	17.86	21.67	19.85	18.84	21.06	17.11	16.81	16.39	17.97	16.56	17.05	20.77	19.86	21.62	20.63	19.47	20.76	20.5	22.75	17.87	23.62
FILA_HUMAN	P20930	Filaggrin	13	-0.0654463	0.704519	0.807025	20.16	17.62	16.92	15.6	16.75	17.64	18.92	16.64	17.98	13.38	13.23	13.99	17.05	18.4	17.9	16.23	17.18	20.62	15.85	15.69	15.24	16.83	17.33	14.58	15.86	18.13	18.54	18.68	19.12	14.85	17.1	18.57	20.27	16.18	17.11	18.61	23.62
FLNA_HUMAN	P21333	Filamin-A	4	0.557398	0.000413225	0.00923913	21.28	19.28	19.85	11.92	15.31	16.57	15.71	15.37	16.55	16.13	17.51	17.85	17.22	13.83	12.26	18.8	18.53	19.62	12.69	12.18	15.74	14.62	15.59	10.56	17.36	13.75	13.81	14.59	16.39	14.34	10.94	13.53	20.06	18.82	19.77	15.44	23.62
G3P_HUMAN	P04406	Glyceraldehyde-3-phosphate dehydrogenase	33	0.284484	0.0926443	0.205141	23.13	21.69	21.49	20.73	22.41	23	22.84	22.45	22.12	22.88	23.12	22.36	23.04	21.27	23.71	22.56	21.41	22.57	20.81	19.69	22.5	20.56	20.7	21.51	21.26	22.02	20.15	20.85	22.32	21.98	19.8	21.54	22.45	21.43	23	22.64	19.75
G6PD_HUMAN	P11413	Glucose-6-phosphate 1-dehydrogenase	4	0.53189	0.000842006	0.0142624	21.85	18.78	19.53	14.99	14.86	14.71	16	15.13	21.48	21.51	19.68	17.02	21.57	15.15	20.45	17.08	15.4	19.1	16.68	11.38	15.34	10.12	17.8	13.31	16.39	16.33	20.9	13.42	16.91	13.85	15.34	17.45	21.16	18.26	21.03	18.81	21.75
G6PI_HUMAN	P06744	Glucose-6-phosphate isomerase	14	0.402046	0.0150696	0.0762708	22.54	20.87	21.2	19.53	21.27	20.66	20.68	21.27	21.87	22.79	21.16	21.92	21.92	19.06	21.73	20.78	21.3	21.34	18.62	18.82	20.66	20.95	20.6	20.79	20.42	20.77	20.11	19.74	20.03	20.48	19.51	19.9	21.13	19.77	20.24	21.5	21.04
GBLP_HUMAN	P63244	Guanine nucleotide-binding protein subunit beta-2-like 1	4	0.537554	0.000722408	0.0132709	21.87	20.3	18.48	18.88	17.68	18.22	19.69	19.42	22.21	19.11	21.49	21.44	22.1	16.51	21.52	22.33	22.37	22.38	18.39	17.16	15.04	21.02	18.76	20.76	21.6	21.37	22.08	17.49	21.43	16.32	19.41	17.84	21.95	19.69	20.76	21.61	23.07
GBP6_HUMAN	Q6ZN66	Guanylate-binding protein 6	19	0.135548	0.430559	0.586305	21.76	20.8	21.75	20.87	21.56	21.5	22.05	20.17	22.69	20.96	21.84	21.81	22.21	20.37	21.19	22.11	22.03	22.17	21.85	20.59	20.91	22.19	22.29	22.58	22	22.82	23.29	22.69	22.49	19.69	22.24	22.15	22.08	20.64	21.58	22.42	21.31
GDIA_HUMAN	P31150	Rab GDP dissociation inhibitor alpha	4	0.40683	0.0138013	0.0705717	21.04	20.43	20.91	18.33	20.48	19.45	20.58	20.6	20.86	20.68	20.75	20.72	21.28	19.27	20.84	20.81	21.02	20.44	17.92	18.68	20.23	20.29	19.79	20.9	20.45	20.94	21.27	19.62	20.97	20.13	19.33	19.86	20.45	19.41	19.94	20.74	25.05
GDIB_HUMAN	P50395	Rab GDP dissociation inhibitor beta	7	0.23896	0.160441	0.282193	21.39	20.89	21.33	19	20.82	19.95	20.81	20.88	21.18	20.99	20.53	19.49	20.81	18.91	21.15	20.38	20.98	20.68	18.07	19.09	20.5	20	20.15	21.05	20.77	20.75	21.04	19.45	20.58	20.24	19.98	20.39	20.82	20.08	19.8	19.93	19.05
GDIR1_HUMAN	P52565	Rho GDP-dissociation inhibitor 1	2	0.0230016	0.894069	0.926487	21.67	19.06	21.85	19.37	19.98	19.48	20.42	20.56	19.38	21.02	19.94	19.65	18.97	18.61	18.89	17.76	18.65	19.7	18.26	19.02	17.73	16.62	19.43	20.8	20.46	21.1	20.56	18.32	18.26	17.94	18.99	17.99	17.04	19.67	17.59	17.84	24.84
GDIR2_HUMAN	P52566	Rho GDP-dissociation inhibitor 2	4	0.207681	0.224208	0.353038	21.4	23.06	23.13	17.82	21.07	20.72	19.37	21.41	20.23	17.74	17.81	20.33	20.85	16.69	18.86	16.49	12.83	16.24	16.36	14.48	16.1	13.03	19.42	13.16	17.68	17.44	14.7	16.66	12.06	18.03	11.75	16.74	20.15	20.99	22.29	17.83	24.84
GELS_HUMAN	P06396	Gelsolin	11	0.0607986	0.724656	0.8229	20.52	20.39	20.97	19.67	21.1	20.69	19.88	19.92	19.58	21.92	19.97	20.57	20.85	17.51	20.78	19.62	20.05	18.84	19.39	19.02	22.37	19.65	19.71	18.56	18.94	18.29	19.48	19.62	18.08	20.43	19.58	19.31	20.54	20.18	20.02	20.55	24.84
GFAP_HUMAN	Q96P18	Glial fibrillary acidic protein	3	0.171464	0.317354	0.46433	23.45	24.98	22.87	20.45	22.78	24.05	21.33	23.56	24	24.14	23.95	24.12	23.23	23.84	21.73	22.29	21.63	17.66	22.06	20.97	23.2	20.52	20.19	16.98	20.48	20.89	22.96	24.36	22.97	22	13.91	16.78	23.51	19.33	24.6	23.59	24.84
GLNA_HUMAN	P15104	Glutamine synthetase	3	0.524308	0.00102942	0.0159559	21.26	17.99	18.03	19.01	21.22	18.37	21.65	17.57	21.75	19.64	22.04	21.36	22.34	17.42	19.5	20.86	21.48	21.77	17.59	18.13	13.97	17.96	21.45	22.09	21.57	20.89	22.22	19.95	24.86	18.59	20.43	20.71	21.2	21.66	22.85	20.09	24.84
GRP78_HUMAN	P11021	78 kDa glucose-regulated protein	13	0.388544	0.0191888	0.0849788	19.9	19.75	20.57	20.71	20.99	20.47	21.18	20.26	20.9	20.99	21.46	21.43	21.55	19.31	22.11	21.45	20.97	21.64	20.18	19.5	19.59	20.95	20.49	21.06	21.01	21.59	21.09	20.38	21.26	18.19	19.98	20.44	20.53	20.76	21.58	21.41	24.84
GSTP1_HUMAN	P09211	Glutathione S-transferase P	12	0.292469	0.0834588	0.189021	23.28	23.04	23.68	22.61	23.51	22.85	23.41	23.33	22.57	23.01	23.45	23.47	22.82	23.1	24.57	23.32	22.79	23.53	21.99	21.64	22.3	22.26	22.6	23.2	22.76	22.9	22.39	22.27	23.04	22.35	21.92	22.6	23.05	22.2	23.02	23.07	24.84
H11_HUMAN	Q02539	Histone H1.1	3	0.332958	0.0472262	0.134622	15.54	21.07	21.24	19.45	20.62	19.88	20.59	19.21	19.95	19.66	20.83	20.08	20.72	19.23	20.19	20.41	20.22	20.83	17.6	18.84	19.49	16.49	17.82	15.76	21.72	17.65	18.11	17.48	20.11	15.05	12.33	18.31	21.66	19.72	23.36	18.37	24.84
H12_HUMAN	P16403	Histone H1.2	6	0.294546	0.0811898	0.185408	18.99	20.25	18.68	19.89	20.35	18.46	20.02	18.68	20.76	19.42	18.9	17.59	19.31	20.48	21.61	19.96	20.84	21.27	18.77	15.83	15.82	15.83	19.27	16.64	20.93	19.44	18.97	17.17	19.64	15.87	13.5	18.42	19.99	18.95	21.16	16.74	24.84
H13_HUMAN	P16402	Histone H1.3	6	0.294546	0.0811898	0.185408	18.99	20.25	18.68	19.89	20.35	18.46	20.02	18.68	20.76	19.42	18.9	17.59	19.31	20.48	21.61	19.96	20.84	21.27	18.77	15.83	15.82	15.83	19.27	16.64	20.93	19.44	18.97	17.17	19.64	15.87	13.5	18.42	19.99	18.95	21.16	16.74	24.84
H14_HUMAN	P10412	Histone H1.4	6	0.294546	0.0811898	0.185408	18.99	20.25	18.68	19.89	20.35	18.46	20.02	18.68	20.76	19.42	18.9	17.59	19.31	20.48	21.61	19.96	20.84	21.27	18.77	15.83	15.82	15.83	19.27	16.64	20.93	19.44	18.97	17.17	19.64	15.87	13.5	18.42	19.99	18.95	21.16	16.74	24.84
H15_HUMAN	P16401	Histone H1.5	6	0.363441	0.0293463	0.105692	18.28	20.68	20.45	17.71	19.13	19.7	19.76	18.21	20.16	19.68	20.07	19.39	18.6	19.14	20.57	19.69	17.89	18.93	17.88	18.02	17.4	16.41	16.79	17.08	20.21	18.94	20.03	19.82	17.43	15.38	16.73	17.7	20.97	18.25	22.45	18.42	24.84
H1T_HUMAN	P22492	Histone H1t	2	0.309717	0.0660313	0.166251	13.28	21.27	21.42	18.85	20.91	20.17	21.03	18.84	20.31	20.11	21.32	20.86	21.02	18.15	21.28	20.76	20.9	21.96	16.91	18.97	20.43	18.7	17.51	13.76	22.06	17.13	17.39	16.73	20.49	16.16	10.07	19.01	22.71	19.76	24.16	17.47	24.84
H2A1A_HUMAN	Q96QV6	Histone H2A type 1-A	2	-0.269627	0.111771	0.227596	19.87	18.68	20.91	24.22	24.79	23.92	23.79	23.71	24.83	22.1	22.65	20.2	23.24	26.24	25.94	24.82	25.19	24.28	22.76	24.58	20.83	23.87	24.46	25.02	25.91	25.1	25.08	24.32	24.1	23.99	23.56	23.57	23.63	22.57	22.23	22.89	24.84
H2A1B_HUMAN	P04908	Histone H2A type 1-B/E	14	0.248716	0.143542	0.259843	18.78	21.41	21.35	18.89	21.75	20.69	19.83	20.94	19.34	19.91	18.91	21.55	21.57	21.36	21.95	19.51	20.66	20.79	18.5	17.92	20.64	17.26	18.91	21.26	20.58	21.15	17.83	18.95	20.33	19.01	18.18	18.86	21	20.38	22.47	20.25	19.41
H2A1C_HUMAN	Q93077	Histone H2A type 1-C	15	0.316163	0.0603072	0.158803	19.06	21.7	21.67	18.53	21.49	20.6	18.99	20.85	18.97	20.09	19.15	21.58	21.59	21.3	20.95	19.58	20.16	20.67	17.27	17.69	20.24	17.16	18.39	20.94	19.09	20.08	17.83	18.44	19.72	18.19	15.36	18.73	21.02	19.18	22.61	20.29	20
H2A1D_HUMAN	P20671	Histone H2A type 1-D	14	0.375053	0.0242035	0.0949693	20.66	22.05	21.59	18.63	21.57	21.7	20.85	21.98	19.82	21.64	20.24	22.13	22.29	22.07	21.44	20.75	22.06	20.73	18.44	17.44	21	17.8	19.96	21.42	20.83	21.2	18.22	20.47	21.21	20.35	18.88	19.68	20.63	20.9	23.1	19.99	22.53
H2A1H_HUMAN	Q96KK5	Histone H2A type 1-H	15	0.408118	0.0134758	0.0699269	20.79	22.3	21.88	18.29	21.32	21.53	19.94	21.81	19.41	21.69	20.38	22.11	22.26	21.96	20.48	20.72	21.45	20.62	17.22	17.24	20.57	17.66	19.36	21.09	19.32	20.13	18.19	19.84	20.54	19.42	16	19.48	20.68	19.66	23.19	20.05	21.19
H2A1J_HUMAN	Q99878	Histone H2A type 1-J	15	0.408118	0.0134758	0.0699269	20.79	22.3	21.88	18.29	21.32	21.53	19.94	21.81	19.41	21.69	20.38	22.11	22.26	21.96	20.48	20.72	21.45	20.62	17.22	17.24	20.57	17.66	19.36	21.09	19.32	20.13	18.19	19.84	20.54	19.42	16	19.48	20.68	19.66	23.19	20.05	22.59
H2A1_HUMAN	P0C0S8	Histone H2A type 1	15	0.408118	0.0134758	0.0699269	20.79	22.3	21.88	18.29	21.32	21.53	19.94	21.81	19.41	21.69	20.38	22.11	22.26	21.96	20.48	20.72	21.45	20.62	17.22	17.24	20.57	17.66	19.36	21.09	19.32	20.13	18.19	19.84	20.54	19.42	16	19.48	20.68	19.66	23.19	20.05	22.94
H2A2A_HUMAN	Q6FI13	Histone H2A type 2-A	16	0.324006	0.0538808	0.14684	20.71	22.26	21.74	18.21	21.16	21.52	20.23	21.79	19.54	22.17	19.29	21.09	21.87	21.75	19.99	20.5	20.34	20.07	16.2	17.23	19.64	18.04	18.23	20.9	18.25	19.38	17.32	19.14	20.07	19.22	15.56	17.71	19.64	18.99	21.98	19.44	22.34
H2A2B_HUMAN	Q8IUE6	Histone H2A type 2-B	12	0.361324	0.030374	0.105692	21.13	21.42	21.43	18.52	20.73	20.84	19.05	21.36	19.71	21.02	19.4	21.52	21.98	21.33	20.59	19.9	20.83	20.46	17.38	17.79	20.84	16.84	19.14	21.35	19.2	20.13	18.95	19.49	19.89	19.25	15.46	20.67	20.94	20.11	22.59	21.15	23.85
H2A2C_HUMAN	Q16777	Histone H2A type 2-C	16	0.324006	0.0538808	0.14684	20.71	22.26	21.74	18.21	21.16	21.52	20.23	21.79	19.54	22.17	19.29	21.09	21.87	21.75	19.99	20.5	20.34	20.07	16.2	17.23	19.64	18.04	18.23	20.9	18.25	19.38	17.32	19.14	20.07	19.22	15.56	17.71	19.64	18.99	21.98	19.44	20.75
H2A3_HUMAN	Q7L7L0	Histone H2A type 3	14	0.248716	0.143542	0.259843	18.78	21.41	21.35	18.89	21.75	20.69	19.83	20.94	19.34	19.91	18.91	21.55	21.57	21.36	21.95	19.51	20.66	20.79	18.5	17.92	20.64	17.26	18.91	21.26	20.58	21.15	17.83	18.95	20.33	19.01	18.18	18.86	21	20.38	22.47	20.25	20.96
H2AJ_HUMAN	Q9BTM1	Histone H2A.J	15	0.408118	0.0134758	0.0699269	20.79	22.3	21.88	18.29	21.32	21.53	19.94	21.81	19.41	21.69	20.38	22.11	22.26	21.96	20.48	20.72	21.45	20.62	17.22	17.24	20.57	17.66	19.36	21.09	19.32	20.13	18.19	19.84	20.54	19.42	16	19.48	20.68	19.66	23.19	20.05	18.37
H2AV_HUMAN	Q71UI9	Histone H2A.V	3	0.507575	0.00157836	0.0223113	21.67	19.26	21.12	19.92	20.26	19.24	17.27	20.58	21.34	21.87	20.91	20.87	21.44	18.53	19.85	17.38	18.82	19.44	17.46	16.17	20.5	13.41	13.93	16.5	17.54	13.71	19.12	16.47	17.19	16.14	19.89	21	17.69	21.32	20.85	18.87	26.18
H2AX_HUMAN	P16104	Histone H2A.x	11	0.275008	0.104527	0.220073	20.99	20.99	20.99	19	21	20.98	20.17	21.54	20.28	20.89	19.1	21.48	21.99	21.4	21.88	19.85	21.58	20.58	19.03	18.12	21.44	16.94	19.92	21.81	21.2	21.56	19.07	20.29	20.71	20.47	19.23	21.06	20.9	21.81	22.41	21.19	23.04
H2AY_HUMAN	O75367	Core histone macro-H2A.1	9	0.335526	0.0454437	0.131047	21.02	22.56	22.41	17.74	19.76	20.28	19.74	21.18	18.91	21.86	18.26	21.62	22.07	19.76	19.6	18.16	20.19	19.37	18.68	16.67	21.39	16.94	18.38	20.64	19.44	19.13	16.55	18.38	19.45	19.89	17.89	20.19	20.69	21.63	22.35	20.75	16.3
H2B1A_HUMAN	Q96A08	Histone H2B type 1-A	7	0.377753	0.0231215	0.093238	25.06	25.58	26.18	24.42	24.84	25.4	25.28	25.59	24.64	25.34	25.28	25.14	25.14	24.63	24.56	24.89	24.87	24.84	23.98	24.18	24.83	24.7	24.28	25.62	24.48	24.33	24.67	24.81	24.6	24.38	24.28	25.17	24.49	25.28	26.97	24.97	21.3
H2B1B_HUMAN	P33778	Histone H2B type 1-B	11	0.34969	0.0365633	0.109249	24.96	25.25	25.63	24.47	24.98	25.45	25.32	25.65	24.59	25.34	25.12	24.88	25.1	24.84	24.45	24.81	24.78	24.64	23.82	23.28	24.67	24.52	24.37	25.57	24.33	24.48	24.57	24.62	24.38	24.24	24.08	24.8	24.4	25.38	26.79	24.84	22.39
H2B1C_HUMAN	P62807	Histone H2B type 1-C/E/F/G/I	11	0.34969	0.0365633	0.109249	24.96	25.25	25.63	24.47	24.98	25.45	25.32	25.65	24.59	25.34	25.12	24.88	25.1	24.84	24.45	24.81	24.78	24.64	23.82	23.28	24.67	24.52	24.37	25.57	24.33	24.48	24.57	24.62	24.38	24.24	24.08	24.8	24.4	25.38	26.79	24.84	20.35
H2B1D_HUMAN	P58876	Histone H2B type 1-D	11	0.34969	0.0365633	0.109249	24.96	25.25	25.63	24.47	24.98	25.45	25.32	25.65	24.59	25.34	25.12	24.88	25.1	24.84	24.45	24.81	24.78	24.64	23.82	23.28	24.67	24.52	24.37	25.57	24.33	24.48	24.57	24.62	24.38	24.24	24.08	24.8	24.4	25.38	26.79	24.84	19.44
H2B1H_HUMAN	Q93079	Histone H2B type 1-H	11	0.34969	0.0365633	0.109249	24.96	25.25	25.63	24.47	24.98	25.45	25.32	25.65	24.59	25.34	25.12	24.88	25.1	24.84	24.45	24.81	24.78	24.64	23.82	23.28	24.67	24.52	24.37	25.57	24.33	24.48	24.57	24.62	24.38	24.24	24.08	24.8	24.4	25.38	26.79	24.84	19.44
H2B1J_HUMAN	P06899	Histone H2B type 1-J	10	0.34969	0.0365633	0.109249	24.96	25.25	25.63	24.47	24.98	25.45	25.32	25.65	24.59	25.34	25.12	24.88	25.1	24.84	24.45	24.81	24.78	24.64	23.82	23.28	24.67	24.52	24.37	25.57	24.33	24.48	24.57	24.62	24.38	24.24	24.08	24.8	24.4	25.38	26.79	24.84	21.43
H2B1K_HUMAN	O60814	Histone H2B type 1-K	10	0.34969	0.0365633	0.109249	24.96	25.25	25.63	24.47	24.98	25.45	25.32	25.65	24.59	25.34	25.12	24.88	25.1	24.84	24.45	24.81	24.78	24.64	23.82	23.28	24.67	24.52	24.37	25.57	24.33	24.48	24.57	24.62	24.38	24.24	24.08	24.8	24.4	25.38	26.79	24.84	20.79
H2B1L_HUMAN	Q99880	Histone H2B type 1-L	11	0.34969	0.0365633	0.109249	24.96	25.25	25.63	24.47	24.98	25.45	25.32	25.65	24.59	25.34	25.12	24.88	25.1	24.84	24.45	24.81	24.78	24.64	23.82	23.28	24.67	24.52	24.37	25.57	24.33	24.48	24.57	24.62	24.38	24.24	24.08	24.8	24.4	25.38	26.79	24.84	18.89
H2B1M_HUMAN	Q99879	Histone H2B type 1-M	11	0.34969	0.0365633	0.109249	24.96	25.25	25.63	24.47	24.98	25.45	25.32	25.65	24.59	25.34	25.12	24.88	25.1	24.84	24.45	24.81	24.78	24.64	23.82	23.28	24.67	24.52	24.37	25.57	24.33	24.48	24.57	24.62	24.38	24.24	24.08	24.8	24.4	25.38	26.79	24.84	20.95
H2B1N_HUMAN	Q99877	Histone H2B type 1-N	11	0.34969	0.0365633	0.109249	24.96	25.25	25.63	24.47	24.98	25.45	25.32	25.65	24.59	25.34	25.12	24.88	25.1	24.84	24.45	24.81	24.78	24.64	23.82	23.28	24.67	24.52	24.37	25.57	24.33	24.48	24.57	24.62	24.38	24.24	24.08	24.8	24.4	25.38	26.79	24.84	20.29
H2B1O_HUMAN	P23527	Histone H2B type 1-O	11	0.34969	0.0365633	0.109249	24.96	25.25	25.63	24.47	24.98	25.45	25.32	25.65	24.59	25.34	25.12	24.88	25.1	24.84	24.45	24.81	24.78	24.64	23.82	23.28	24.67	24.52	24.37	25.57	24.33	24.48	24.57	24.62	24.38	24.24	24.08	24.8	24.4	25.38	26.79	24.84	20.74
H2B2E_HUMAN	Q16778	Histone H2B type 2-E	11	0.34969	0.0365633	0.109249	24.96	25.25	25.63	24.47	24.98	25.45	25.32	25.65	24.59	25.34	25.12	24.88	25.1	24.84	24.45	24.81	24.78	24.64	23.82	23.28	24.67	24.52	24.37	25.57	24.33	24.48	24.57	24.62	24.38	24.24	24.08	24.8	24.4	25.38	26.79	24.84	19.64
H2B2F_HUMAN	Q5QNW6	Histone H2B type 2-F	11	0.34969	0.0365633	0.109249	24.96	25.25	25.63	24.47	24.98	25.45	25.32	25.65	24.59	25.34	25.12	24.88	25.1	24.84	24.45	24.81	24.78	24.64	23.82	23.28	24.67	24.52	24.37	25.57	24.33	24.48	24.57	24.62	24.38	24.24	24.08	24.8	24.4	25.38	26.79	24.84	25.59
H2B3B_HUMAN	Q8N257	Histone H2B type 3-B	11	0.34969	0.0365633	0.109249	24.96	25.25	25.63	24.47	24.98	25.45	25.32	25.65	24.59	25.34	25.12	24.88	25.1	24.84	24.45	24.81	24.78	24.64	23.82	23.28	24.67	24.52	24.37	25.57	24.33	24.48	24.57	24.62	24.38	24.24	24.08	24.8	24.4	25.38	26.79	24.84	17.86
H2BFS_HUMAN	P57053	Histone H2B type F-S	10	0.34969	0.0365633	0.109249	24.96	25.25	25.63	24.47	24.98	25.45	25.32	25.65	24.59	25.34	25.12	24.88	25.1	24.84	24.45	24.81	24.78	24.64	23.82	23.28	24.67	24.52	24.37	25.57	24.33	24.48	24.57	24.62	24.38	24.24	24.08	24.8	24.4	25.38	26.79	24.84	20.58
H33_HUMAN	P84243	Histone H3.3	2	0.282245	0.0953534	0.210201	21.39	21.89	22.43	19.8	13.84	21.72	22.03	22.01	20.59	21.91	22.66	20.99	20.63	20.5	22.35	21.74	20.05	22.26	19.09	19.77	20.78	19.27	17.56	18.46	20.09	18.51	20.29	14.9	16.39	19.11	19.04	20.38	18.46	22.12	22.57	18.86	13.92
H4_HUMAN	P62805	Histone H4	12	0.309217	0.0664926	0.166311	23.78	23.08	21.69	22.92	23.6	23.32	23.66	23.72	23.97	23.31	23.71	23.78	24.17	23.64	23.38	23.8	23.69	23.95	22.7	21.22	23.64	22.33	22.5	22.79	23.81	22.82	23.43	23.61	23.64	22.07	23.21	22.39	23.68	21.83	23.51	23.58	21.92
H90B2_HUMAN	Q58FF8	Putative heat shock protein HSP 90-beta 2	6	0.385943	0.0200817	0.0851326	21.75	21.05	21.26	20.86	21.52	20.51	20.75	21.17	21.19	21.6	22.58	21.34	22.26	20.71	20.29	22.14	21.68	21.7	20.94	19.99	20.95	21.5	21.12	21.19	21.43	21.55	23.06	20.28	22.24	19.92	20.14	21.11	22.06	20.02	21.93	22.02	22.08
H90B3_HUMAN	Q58FF7	Putative heat shock protein HSP 90-beta-3	6	0.106564	0.536189	0.66654	21.27	20.44	20.38	19.15	20.53	20.7	20.38	19.31	20.92	20.36	19.99	20.42	20.42	20.02	21.81	20.77	20.82	20.86	18.9	19.92	20.86	20.41	18.95	22.16	22.61	20.87	21.35	21.45	19.49	16.72	18.82	17.94	21.1	20.35	19.54	21.55	23.87
H90B4_HUMAN	Q58FF6	Putative heat shock protein HSP 90-beta 4	3	0.289692	0.08657	0.194293	21.06	20.04	20.25	19.7	20.65	20.82	20.58	20.32	19.99	21.03	22.25	20.04	21.22	20.55	20.76	21.34	20.34	20.2	18.16	19.27	18.17	20.45	20.67	19.93	20.31	20.63	22.56	19.74	21.57	18.97	16.23	17.52	21.27	19.76	21.25	21.56	17.47
HBAZ_HUMAN	P02008	Hemoglobin subunit zeta	2	0.413338	0.0122214	0.0688841	1.57	12.85	5.63	8.33	12.28	16.04	4.8	16.01	24.97	26.57	24.75	25.46	28.3	22.18	24.83	23.25	15.99	17.32	8.7	22.89	10.8	8.86	22.04	14.82	10.13	7.91	11.72	23.36	13.92	30.07	17.15	12.98	27.54	16.74	25.55	25.48	23.58
HBA_HUMAN	P69905	Hemoglobin subunit alpha	14	0.423484	0.0100644	0.0654457	16.65	21.82	19.28	12.71	17.98	19.43	15.94	12.91	21.1	24.79	24.33	22.08	26.91	21.14	23.41	22.88	18.15	18.22	13.77	20.86	17.23	12.39	21.92	14.85	13.64	14.02	14.24	17.75	15.7	28.63	18.47	17.19	16.15	19.33	25.14	22.13	21.18
HBB_HUMAN	Q549N7	Hemoglobin subunit beta	12	0.454763	0.00532746	0.0424926	16.57	24.74	22.72	15.98	22.44	18.77	17.84	17.44	23.85	25.31	23.97	25.43	25.37	20.11	24.53	23.66	19.88	23.09	17.35	21.44	18.43	15.04	24.84	11.93	15.08	14.85	20.04	21.23	17.9	29.94	22.8	22.78	17.19	22.54	25.34	25.44	24.08
HBD_HUMAN	P02042	Hemoglobin subunit delta	7	0.476568	0.00329902	0.0327263	13.91	24.56	21.54	15.45	21.73	16.57	15.59	14.89	22.88	25.9	22.84	25.11	23.31	18.12	24.3	23.29	18.55	22.6	15.6	19.51	16.5	12.96	24.06	12.27	12.94	14.12	18.36	18.82	18.16	29.47	21.79	22.34	15	22.32	24.36	25.08	18.1
HEMO_HUMAN	P02790	Hemopexin	3	0.363661	0.0292409	0.105692	18.71	17.83	14.58	20.07	21.02	18.1	20.78	21.07	18.21	23.23	20.14	23.09	23.03	22.23	21.96	16.03	19.34	20.43	18.18	16.51	15.75	14.37	12.65	15.62	14.77	17.18	19.12	17.79	16.77	22.6	19.85	20.27	20.52	19.16	23.38	17.84	24.42
HIS1_HUMAN	P15515	Histatin-1	7	-0.00448944	0.979268	0.985228	16.51	19.79	18.98	24.54	24.07	23.49	24.89	24.91	21.07	17.89	21.53	22.77	21.32	21.83	19.68	19.3	22.01	20.68	16.2	17.99	22.48	20.47	21.67	21.1	20.48	20.3	20.42	22.58	17.79	19.48	23.55	22.61	22.92	23.89	22.88	22.86	21.31
HPTR_HUMAN	P00739	Haptoglobin-related protein	4	0.18902	0.269556	0.407621	22.18	20.71	23.29	21.58	21.64	21.5	21.54	22.36	23.45	23.59	23.07	24.18	24.32	24.22	22.82	21.18	18.93	22.07	22.09	23.75	22.23	19.34	17.09	18.8	17.61	18.88	16.11	22.37	21.28	23.6	21.37	20.42	21.33	18.36	23.85	21.96	17.87
HPT_HUMAN	P00738	Haptoglobin	10	0.218957	0.199487	0.322298	21.47	20.98	23.22	20.8	19.99	20.3	21.23	22.31	22.7	22.84	22.92	23.4	22.86	24.23	22.83	19.35	19.21	21.36	20.15	23.37	21.98	19.15	17.59	18.82	17.73	18.25	17.01	21.9	20.39	23.28	20.6	19.02	19.08	19.18	23.45	20.7	23.34
HS71L_HUMAN	P34931	Heat shock 70 kDa protein 1-like	9	0.412162	0.0124951	0.0696356	22.51	22.74	22.72	20.13	22.49	20.66	21.82	21.02	22.27	22.77	22.58	21.72	22.7	22.59	22.94	22.49	22.93	23.26	21.89	21.66	22	22.79	21.85	21.64	22.53	22.87	22.51	21.96	22.56	20.87	21.28	21.23	22.36	21.46	23.43	22.35	21.16
HS902_HUMAN	Q14568	Putative heat shock protein HSP 90-alpha A2	6	0.437514	0.00762055	0.0555375	22.77	21.53	22.49	20.74	21.16	21.07	20.88	21.78	20.43	22.24	22	21.39	22.37	20.33	21.25	22.23	21.57	20.94	20.04	20.48	20.56	20.71	21.72	20.48	20.73	21.88	22.83	21	22.27	21.64	20.3	21.23	21.89	22.01	22.32	21.58	23.96
HS904_HUMAN	Q58FG1	Putative heat shock protein HSP 90-alpha A4	2	0.296617	0.0789744	0.18477	22.84	20.62	22.51	20.51	20.19	20.07	22.4	22.27	20.4	21.77	20.98	21.98	22.42	19.26	20.29	22.59	22.67	20.81	19.21	20.54	21.06	20.04	21.63	20.11	20.24	22.47	22.49	21.72	22.15	20.62	21.87	20.5	21.63	21.44	21.5	20.31	18.27
HS90A_HUMAN	P07900	Heat shock protein HSP 90-alpha	13	0.532179	0.000835503	0.0142624	21.57	20.81	21.09	20.95	20.09	20.13	21.17	20.79	21.27	19.92	21.79	21.42	21.29	19.19	21.24	21.74	21.8	21.68	18.73	19.77	19.17	20.28	20.13	20.68	20.38	20.97	21.77	20.75	21.32	18.01	19.47	20.05	21.8	20.51	21.63	21.01	23.59
HS90B_HUMAN	P08238	Heat shock protein HSP 90-beta	15	0.45853	0.00491488	0.0406297	21.53	21.21	20.98	19.28	20.79	20.61	20.89	20.24	21.23	20.87	21.45	20.94	21.41	20.22	20.91	21.37	21.38	21.44	19.33	19.61	19.89	20.8	19.84	21.6	21.95	21.4	22.19	20.24	20.97	17.74	19.7	19.89	21.02	20.73	21.39	21.58	23.89
HSP71_HUMAN	P08107	Heat shock 70 kDa protein 1A/1B	20	0.597637	0.000118742	0.00841373	21.33	21.08	20.74	18.74	20.43	20.34	19.87	20.32	21.14	22.22	21.31	21.08	22.09	20.04	22.23	21.63	22.24	22.56	20.08	18.66	20.32	21.3	19.91	20.11	20.63	21.48	21.45	20.47	20.96	19.15	20.3	20.01	21.72	20.62	21.99	21.03	25.86
HSP72_HUMAN	P54652	Heat shock-related 70 kDa protein 2	11	0.195664	0.25277	0.390572	22.09	21.56	22.55	20.07	22.09	20.94	22.9	20.91	21.56	20.76	22.38	21.88	22.46	22.3	22.91	21.77	22.12	22.87	21.27	21.62	20.37	22.26	21.74	21.58	22.84	22.91	21.86	22.3	22.1	19	21.1	19.79	21.62	20.21	22.84	21.72	20.31
HSP76_HUMAN	P17066	Heat shock 70 kDa protein 6	7	0.222111	0.192927	0.31686	21.72	22.55	21.59	20.53	22.54	21.18	21.9	21.23	21.02	20.81	22.56	21.9	22.62	22.66	23.13	21.44	23.02	23.38	21.59	21.74	21.09	22.46	21.97	21.85	22.84	23.13	21.79	22.01	22.72	19	20.98	20.39	21.51	20.91	23.05	21.99	24.48
HSP7C_HUMAN	P11142	Heat shock cognate 71 kDa protein	24	0.286897	0.08979	0.199712	21.21	21.5	21.45	20.13	21.8	20.28	22.2	20.18	21.61	21.03	22.43	21.73	21.51	21.07	22.83	21.74	22.31	22.73	20.73	20.8	20.12	21.73	21.56	21.83	22.72	22.73	22.01	21.83	22.12	19.86	20.98	19.9	21.87	20.02	22.45	21.31	16.74
HSPB1_HUMAN	Q9UC36	Heat shock protein beta-1	23	-0.0575479	0.738849	0.825381	23.62	23.9	24.3	23.73	24.08	23.57	24.63	24.06	23.71	23.66	23.77	23.88	23.99	25.03	24.31	23.69	24.33	24.65	23.7	23.79	23.95	24.39	23.72	24.07	24.14	24.16	23.55	24.01	24.03	23.38	24.01	23.23	23.67	22.99	24.66	23.55	16.74
HV303_HUMAN	P01764	Ig heavy chain V-III region VH26	2	-0.0185959	0.914276	0.939306	22.88	23.07	21.85	21.83	21.97	22.53	21.75	21.93	21.71	22.95	22.66	19.1	18.69	23.13	23.55	22.89	23.14	23.27	23.05	17.81	23.39	20.62	21.29	19	22.01	20.22	17.3	21.35	22.37	22.82	20.29	20.92	23.99	19.26	23.67	22.93	16.74
HV305_HUMAN	P01766	Ig heavy chain V-III region BRO	2	0.0987641	0.566594	0.693902	23.14	23.18	22.84	20.1	22.27	22.19	21.99	21.91	22.77	23.07	22.11	22.57	20.99	23.57	23.67	23.89	23.33	23.24	23.53	23.22	22.89	22.99	20.75	22.28	23.33	24.88	21.86	20.94	23.47	24.16	21.54	23.67	23.94	23.74	23.13	23.4	18.42
HV316_HUMAN	P01777	Ig heavy chain V-III region TEI	2	0.0987641	0.566594	0.693902	23.14	23.18	22.84	20.1	22.27	22.19	21.99	21.91	22.77	23.07	22.11	22.57	20.99	23.57	23.67	23.89	23.33	23.24	23.53	23.22	22.89	22.99	20.75	22.28	23.33	24.88	21.86	20.94	23.47	24.16	21.54	23.67	23.94	23.74	23.13	23.4	21.88
HV320_HUMAN	P01781	Ig heavy chain V-III region GAL	2	0.149517	0.38411	0.538188	23.31	22.47	19.7	22.76	22.39	22.55	21.58	21.96	23.31	23.11	21.67	22.77	22.4	21.94	22.95	23.67	23.64	23	23.96	19.25	24.1	23.47	23.79	21.48	21.64	22.96	23.53	21.59	21.89	19.31	22.39	22.64	24.85	23.36	23.08	24.12	23.07
IDHP_HUMAN	P48735	Isocitrate dehydrogenase [NADP], mitochondrial	2	0.387613	0.0195044	0.0850239	20.99	21.13	18.9	16.87	16.36	17.02	18.21	17.98	21.17	17.67	19.53	18.39	20.42	19.51	14.81	20.42	20.84	20.81	14.81	16.73	16.47	20.01	20.08	20.98	21.4	19.99	21.81	20.48	20.4	16.43	16.9	19.78	20.82	16.66	20.87	20.4	18.49
IF4A1_HUMAN	P60842	Eukaryotic initiation factor 4A-I	7	0.540295	0.000670137	0.0127841	21.26	21.48	20.28	19.11	21.03	20.38	20.93	19.71	22.34	20.17	22.46	21.59	22.21	19.94	20.92	22.44	22.24	22.37	19.37	20.53	19.2	20.41	20.53	21	22.24	21.74	22.66	20.79	21.79	18.36	21.4	19.59	21.91	20.44	21.27	21.73	21.56
IF4A2_HUMAN	Q14240	Eukaryotic initiation factor 4A-II	4	0.418936	0.0109876	0.0656609	21.47	21.44	19.6	19.84	21.49	20.42	21.72	20.04	22.34	19.71	22.49	21.56	22.18	21.28	20.63	22.47	22.23	22.43	19.84	20.94	19.55	20.79	20.62	20.84	22.46	21.95	22.62	20.66	21.82	18.9	21.48	21.45	21.84	19.56	22.07	21.69	21.31
IGHA1_HUMAN	P01876	Ig alpha-1 chain C region	16	0.433167	0.00831657	0.0574176	26.72	26.73	26.58	24.9	25.77	25.76	25.72	25.73	27.3	27.45	27.22	26.94	27.06	27.92	27.12	26.02	25.91	25.97	27.2	24.57	27.93	26	23.98	23.51	25.52	24.9	26.1	25.09	26.61	27.81	25.75	26.62	28.07	28.38	28.31	26.43	16.01
IGHA2_HUMAN	P01877	Ig alpha-2 chain C region	13	0.448214	0.00611612	0.0466707	26.29	26.35	26.16	24.34	25.35	25.3	25.31	25.34	26.91	27.13	26.91	26.59	26.68	27.58	26.76	25.51	25.43	25.52	26.74	23.9	27.45	25.46	23.26	22.81	24.83	24.25	25.59	24.45	26.04	27.37	25.18	26.01	27.76	28.12	27.98	26.01	22.64
IGHG1_HUMAN	P01857	Ig gamma-1 chain C region	16	0.302849	0.0725908	0.173937	24.69	23.89	23.38	21.83	23.31	24.13	23.78	23.67	21.74	25.73	24.23	25.22	24.98	24.42	24.43	24.07	23.3	24.47	22.66	22.23	24.72	21.8	21.66	21.82	21.12	23.71	21.72	22.22	22.2	25.33	21.39	23.54	22.58	23.96	25.56	23.96	18.86
IGHG2_HUMAN	P01859	Ig gamma-2 chain C region	12	0.360268	0.0308979	0.105692	23.92	23.68	23.04	19.53	22.49	21.96	21.44	22.36	21.43	24.43	23.5	24.5	23.93	23.88	25.27	23.74	23.11	24.51	21.56	21.75	22.35	20.73	19.25	19.03	18.32	22.95	17.53	21.63	22.23	25.02	20.56	21.96	22.03	20.98	23.19	22.68	23.65
IGHG3_HUMAN	P01860	Ig gamma-3 chain C region	13	0.358702	0.0316877	0.107651	24.22	23.59	22.89	19.97	22.22	23.09	22.71	22.66	20.25	25.33	23.61	24.64	24.18	23.64	24.08	23.35	22.47	23.86	20.36	19.92	22.65	19.69	19.61	19.77	19.47	22.65	18.94	20.1	20.65	24.57	19.43	21.75	21.8	21.82	23.99	23.07	21.44
IGHG4_HUMAN	P01861	Ig gamma-4 chain C region	14	0.330681	0.0488528	0.137676	24.11	23.21	22.6	20.09	22	22.99	22.35	22.44	19.98	25.02	22.95	24.23	23.92	23.54	23.68	23.2	21.91	23.37	21.1	20.48	23.44	19.85	20.3	20	18.79	22.47	20.08	20.8	20.81	24.5	19.83	22.56	21.53	23.19	24.74	23.04	13.69
IGHM_HUMAN	P01871	Ig mu chain C region	7	0.281108	0.0967524	0.212341	23.16	20.68	18.41	21.35	22.06	22.35	21.13	21.85	22.32	23.09	21.41	22.5	22.73	22.82	20.19	23.98	23.85	22.65	24.12	21.56	23.16	23.91	14.5	16.15	16.11	16.04	18.08	21.76	22.27	23.15	21.71	22.67	24.62	23.92	23.45	23.65	23.66
IGKC_HUMAN	P01834	Ig kappa chain C region	6	-0.0736401	0.669505	0.775875	26.76	26.04	26	26.3	25.87	25.59	25.55	25.64	26.94	26.58	25.71	26.49	26.36	26.69	27.07	26.68	26.91	26.55	27.17	26.83	26.34	26.07	27.67	25.89	26	26.58	26.03	26.45	24.81	27.14	26.89	26.41	27.56	25.71	26.21	26.55	24.22
IL1F6_HUMAN	Q9UHA7	Interleukin-1 family member 6	3	0.338228	0.0436274	0.127289	22.35	21.09	20.85	21.03	21.74	21.05	21.7	21.55	22.74	21.88	23.56	22.96	22.52	20.08	22.62	22.11	22.9	22.93	20.89	21.21	22.37	22.21	22.24	23.01	23.25	22.63	23.28	21.93	22.33	20.47	22.39	23.11	22.44	21.62	20.92	22.34	24.22
IL1RA_HUMAN	P18510	Interleukin-1 receptor antagonist protein	5	-0.573109	0.000258854	0.00911802	23.08	21.79	22.03	22.33	22.89	22.1	23.04	22.51	20.52	22.09	20.63	21.39	21.42	20.4	23.27	21.94	21.81	19.96	21.46	22.82	23.08	20.73	22.92	22.83	21.71	23.41	21.18	22.07	21.95	21.29	22.08	21.47	21.28	19.04	21.77	21.87	18.58
ILEU_HUMAN	P30740	Leukocyte elastase inhibitor	17	0.146845	0.392759	0.545683	22.14	21.15	21.54	22.18	21.97	20.65	22.28	22.15	22.08	22.49	22.48	21.75	21.55	21.95	21.58	20.22	21.62	21.14	20.93	21.11	21.88	22.22	21.65	21.84	21.38	22.68	22.22	22.23	21.84	20.76	21.36	21.93	21.03	22.05	23.17	22.86	21.63
INVO_HUMAN	P07476	Involucrin	17	-0.0767578	0.656355	0.766005	22.65	21	21.8	21.44	22.4	21.25	22.54	21.31	22.7	20.32	21.37	22.34	22.43	21.14	21.2	22.2	22.26	22.3	22.28	21.07	20.58	22.39	22.55	22.73	21.7	23.12	23.47	22.79	21.99	20.12	22.22	22.19	22.21	18.94	20.87	22.12	21.8
IQGA1_HUMAN	P46940	Ras GTPase-activating-like protein IQGAP1	9	0.565923	0.000321537	0.00911802	18.41	19.84	19.5	15.44	17.58	15.88	18.17	15.21	21.11	17.81	18.5	18.97	19.06	16.17	18.05	20.01	19.07	18.51	15.39	16.77	17.06	17.85	19.13	18.91	16.62	18.05	19.3	18.36	16.71	16.58	16.11	17.46	18.84	18.37	19.48	17.88	21.19
ISK5_HUMAN	Q9NQ38	Serine protease inhibitor Kazal-type 5	4	0.361073	0.0304977	0.105692	18.8	19.24	17.6	16.68	18.24	17.89	16.49	16.76	19.66	19.41	19.28	19.36	19.3	20.6	20.5	16.66	18.83	19.4	15.93	16.97	17.67	17.55	16	16.67	20.47	18.24	19.08	15.61	18.09	18.32	15.44	16.34	19.41	16.62	17.52	16.24	21.98
K1C10_HUMAN	P13645	Keratin, type I cytoskeletal 10	27	0.111866	0.515982	0.65791	25.2	24.22	25.16	25.03	24.23	24.47	25.23	24.99	25.45	24.46	24.44	25.65	25.63	23.29	24.68	24.53	25.01	24.84	24.51	23.5	25.33	24.54	25.04	23	22.93	24.88	24.94	24.69	24.82	25.37	25.59	23.82	25.77	24.11	24.66	25.46	23.07
K1C12_HUMAN	Q99456	Keratin, type I cytoskeletal 12	5	-0.0115437	0.946725	0.962245	26.16	26.52	26.93	26.44	26.18	26.41	26.54	26.59	25.66	26.08	25.04	26.62	24.58	24.74	25.78	25.85	25.92	25.15	25.62	24.56	25.97	25.34	26.3	25.29	23.71	25.05	23.81	25.49	24.91	25.01	23.56	23.52	25.62	25.66	26.12	26.12	18.88
K1C13_HUMAN	P13646	Keratin, type I cytoskeletal 13	59	0.039381	0.819619	0.88665	25.09	27.19	27.12	25.4	25.98	26.21	26.4	26.35	25.35	25.39	26.12	26.49	25.52	26	25.74	25.8	26.31	26.33	26.26	25.06	26.27	26.21	26.06	25.95	24.73	25.67	24.6	25.97	26.09	25.17	24.42	24.81	26.18	24.62	26.79	26.11	18.88
K1C14_HUMAN	P02533	Keratin, type I cytoskeletal 14	45	-0.0561095	0.745157	0.828695	25.6	25.22	26.29	25.86	26.04	25.79	26.57	26.06	24.8	24.95	26	25.92	26.42	24.66	25.81	26.05	26.03	26.2	25.02	24.33	26.46	25.69	25.9	25.1	25.37	26.5	25.98	25.16	25.44	25.34	24.92	24.51	26.57	24.74	26.18	26.17	22.89
K1C15_HUMAN	P19012	Keratin, type I cytoskeletal 15	19	-0.0578087	0.737707	0.825381	25.97	26.63	27.25	26.45	26.08	26.13	26.8	26.4	26	25.75	26.47	26.43	26.27	26.12	25.7	26.28	26.53	26.61	26.57	26.71	26.69	26.59	25.76	25.99	25.97	25.3	25.83	26.21	26.06	25.86	26.3	25.1	26.28	25.01	27.2	26.32	23.59
K1C16_HUMAN	P08779	Keratin, type I cytoskeletal 16	50	-0.186393	0.27639	0.414168	25.89	25.46	25.79	25.85	26.41	25.93	26.51	26.11	24.85	25.07	26.12	26.26	26.49	25.22	25.87	25.67	26.14	25.78	25.65	24.92	27.1	26.12	26.08	25.4	26.15	26.36	25.96	25.23	26.01	26.16	25.48	24.35	26.27	25.05	26.66	26.24	23.59
K1C17_HUMAN	Q8N1P6	Keratin, type I cytoskeletal 17	30	0.148658	0.386877	0.540539	24.96	23.58	24.59	24.18	25.07	24.63	24.89	24.84	23.5	23.44	25.14	24.73	25.03	23.31	24.73	25.03	25.09	25.1	22.87	22.38	23.6	24.2	25.12	23.9	24.79	25.57	24.76	23.98	24.5	23.86	23.22	23.65	25.1	23.52	23.85	24.69	23.59
K1C18_HUMAN	P05783	Keratin, type I cytoskeletal 18	2	0.187472	0.273571	0.411186	21.39	19.15	18.83	19.92	20.22	19.94	19.94	16.95	21.33	19.26	16.22	20.72	20.5	19.02	19.58	20.75	20.35	19.95	17.24	14.6	21.63	18.93	20.56	18.54	18.11	19.9	20.59	20.52	18.82	16.31	19.98	19.72	19.46	19.85	20.17	19.67	23.59
K1C19_HUMAN	Q9P1Y4	Keratin, type I cytoskeletal 19	16	-0.0811435	0.638029	0.751692	23.29	22.61	23.25	22.43	23.25	23.86	22.55	22.72	22.84	22.01	22.29	22.46	22.22	22.18	21.8	23.39	22.41	21.87	22.04	20.54	24.8	22.76	23.25	21.27	23.15	23.33	23.27	22.7	22.86	23.1	22.45	22.4	23.12	23.77	23.16	22.35	22.06
K1C20_HUMAN	P35900	Keratin, type I cytoskeletal 20	5	-0.230492	0.176235	0.295901	27.69	28.18	28.43	27.71	28.17	28.14	28.86	28.63	28.22	27.83	28.4	28.51	28.48	27.15	27.97	28.22	28.54	28.75	28.65	27.85	28.94	28.53	28.14	27.71	27.44	28.62	27	28.01	27.87	28.11	27.93	25.33	28.49	25.26	27.32	28.5	24.02
K1C24_HUMAN	Q2M2I5	Keratin, type I cytoskeletal 24	2	-0.176936	0.301921	0.444371	24.66	19.65	22.53	23.54	21.67	24.12	18.24	22.95	22.69	21.38	14.42	11.86	24.11	20.56	23.02	23.39	23.85	23.37	20.42	18.69	19.27	15.09	23.29	21.03	22.76	23.73	25.35	21.58	17.28	19.61	21.79	20.3	20.9	22.35	23.35	23.43	24.02
K1C25_HUMAN	Q7Z3Z0	Keratin, type I cytoskeletal 25	2	0.103804	0.546857	0.676411	27.04	26.04	26.87	26.48	26.44	26.13	27.21	26.58	26.55	26.21	26.8	27.04	27.36	26.31	26.7	25.93	26.57	26.56	26.56	25.33	27.72	26.93	26.42	25.97	26.71	26.81	27.13	26.28	26.77	27.89	27.41	26.57	27.6	27.26	27.64	27.13	26.33
K1C27_HUMAN	Q7Z3Y8	Keratin, type I cytoskeletal 27	3	0.13003	0.44973	0.601257	26.71	26.18	26.56	26.29	25.99	25.84	26.93	26.47	26.37	25.82	26.36	26.91	27.08	25.49	26.2	25.73	26.55	26.48	25.96	25.73	27.32	26.7	26.21	25.82	26.29	26.63	26.91	26.36	26.48	27.23	27.66	26.8	27.1	26.95	27.15	27.02	26.33
K1C28_HUMAN	Q7Z3Y7	Keratin, type I cytoskeletal 28	2	0.103804	0.546857	0.676411	27.04	26.04	26.87	26.48	26.44	26.13	27.21	26.58	26.55	26.21	26.8	27.04	27.36	26.31	26.7	25.93	26.57	26.56	26.56	25.33	27.72	26.93	26.42	25.97	26.71	26.81	27.13	26.28	26.77	27.89	27.41	26.57	27.6	27.26	27.64	27.13	26.33
K22E_HUMAN	P35908	Keratin, type II cytoskeletal 2 epidermal	30	0.441474	0.00703046	0.052835	24.17	23.52	23.54	23.21	22.54	23.26	24.23	23.49	24.42	23.07	24.13	24.89	24.75	24.21	23.6	23.96	24.12	23.99	24.02	22.93	23.04	22.94	23.08	22.62	23.49	24.04	24.09	23.04	24	23.9	23.23	23.19	25.6	23.56	25.16	24.71	23.81
K22O_HUMAN	Q01546	Keratin, type II cytoskeletal 2 oral	34	0.367802	0.0273183	0.10423	22.99	23.78	23.03	22.64	23.1	23.47	24.07	22.29	23.89	23.55	23.77	24.49	24.94	22.08	22.42	22.43	23.64	23.44	22.2	22.19	23.28	22.44	23.36	22.5	23.7	24.25	24.32	22.89	23.96	23.3	23.18	22.53	25	23.44	24.96	24.72	11.67
K2C1B_HUMAN	Q7Z794	Keratin, type II cytoskeletal 1b	5	0.211657	0.215264	0.342214	24.43	24.07	24.24	23.83	23.88	23.97	24.72	24.2	24.87	22.4	23.29	24.4	25.08	24.13	23.14	23.6	24.27	24.33	23.67	22.56	23.86	23.14	24.37	23.22	22.89	24.54	24.41	24	23.08	22.7	24.72	25.25	24.7	24	25.24	24.99	11.67
K2C1_HUMAN	P04264	Keratin, type II cytoskeletal 1	58	0.0363115	0.833473	0.889686	24.71	24.59	24.92	24.82	24.67	24.59	25.43	24.92	24.98	23.7	23.91	25.23	25.21	24.29	24.33	24.45	25.18	25.12	24.47	23.6	24.31	24.44	24.94	24.34	24.39	25.07	24.56	24.14	24.52	24.15	23.75	23.41	25.79	23.51	25.48	25.11	22.21
K2C3_HUMAN	P12035	Keratin, type II cytoskeletal 3	23	0.305053	0.070433	0.172093	23.42	24.17	24.37	22.85	22.79	23.2	24.66	23.65	24.24	21.92	23.48	24.51	24.68	24.03	23.9	23.96	24.53	24.81	23.72	23.59	24.46	23.28	22.68	22.53	23.69	24.39	24.27	23.07	23.57	22.2	23.39	23.83	25.02	24.2	25.62	24.42	18.87
K2C4_HUMAN	P19013	Keratin, type II cytoskeletal 4	75	0.0801078	0.642338	0.753191	25.3	26.85	26.34	25.29	25.6	25.97	26.12	26	25.86	25.45	25.57	26.31	25.91	26.23	24.84	25.13	25.66	26	26.15	25.06	25.69	25.26	24.88	24.65	24.12	25.15	25.1	26.33	25.83	25.67	25.54	24.6	25.29	23.91	26.34	25.92	23.19
K2C5_HUMAN	P13647	Keratin, type II cytoskeletal 5	71	0.314672	0.0615954	0.160659	24.65	25.44	25.5	24.43	24.65	24.59	25.27	25.01	24.48	24.23	25.25	25.05	25.49	24.87	25.23	25.29	25.25	25.64	24.41	23.8	25.01	23.93	24.27	24.08	24.24	25.17	24.36	24.21	24.36	23.68	23.66	23.81	25.3	24.28	26.08	25.59	17.6
K2C6A_HUMAN	P02538	Keratin, type II cytoskeletal 6A	77	0.250789	0.140125	0.257414	25.81	26.04	26.61	25.26	25.85	25.67	26.42	26.25	24.45	25.14	25.94	25.66	26.65	25.59	25.76	25.8	25.76	26.49	24.81	24.18	26.05	24.87	24.58	24.04	24.57	25.59	24.24	25.24	25.39	24.34	24.2	24.19	26.41	25.22	27.15	26.17	19.28
K2C6B_HUMAN	P04259	Keratin, type II cytoskeletal 6B	73	0.23031	0.176586	0.295901	25.7	25.81	26.34	25.08	25.87	25.39	26.23	26.03	24.38	24.93	25.61	25.63	26.28	25.3	25.52	25.53	25.54	26.23	24.97	24.05	25.83	24.55	24.72	23.79	24.33	25.44	24.26	25.15	25.14	24.05	24.11	23.94	26.15	25	26.88	25.94	21.86
K2C6C_HUMAN	P48668	Keratin, type II cytoskeletal 6C	75	0.230507	0.176207	0.295901	25.36	25.75	26.52	25.02	25.82	25.26	26.2	25.99	24.27	24.87	25.24	25.72	26.22	25.37	25.6	25.55	25.46	26.19	24.48	24.05	25.92	24.57	24.39	23.81	24.33	25.45	23.77	24.96	25.08	24.19	23.99	23.93	26.27	25.12	27.02	26.03	15.92
K2C71_HUMAN	Q3SY84	Keratin, type II cytoskeletal 71	5	0.33143	0.0483127	0.136932	25.67	26.73	26.73	25.68	25.6	24.63	24.77	24.35	26.44	25.35	26.17	26.34	26.45	26.93	25.05	25.23	25.82	26.52	27.53	26.17	24.74	24.57	22.07	25.48	24.18	24.55	26.2	24.32	26.42	24.9	26.11	24.84	25.56	24.09	27.95	26.18	19.14
K2C72_HUMAN	Q14CN4	Keratin, type II cytoskeletal 72	7	0.241381	0.156119	0.276048	25.71	26.26	26.87	24.18	25.55	26.09	26.09	25.73	24.72	25.36	26.03	25.88	26.05	22.64	25.33	25.45	25.38	25.52	23.96	22.58	26.11	23.19	21.78	22.84	24.22	24.29	22.26	23.76	25.4	24.68	23.11	23.14	25.82	22.9	26.85	26.67	19.54
K2C73_HUMAN	Q86Y46	Keratin, type II cytoskeletal 73	7	0.450841	0.00578854	0.0448612	25.82	26.96	26.89	25.29	25.65	25.38	25.3	24.93	26.19	25.48	26.24	26.55	26.46	26.88	24.98	25.25	25.74	26.13	25.98	24.71	25.08	24.18	22.39	24.78	24.14	24.89	25.18	24.66	26.23	25.47	25.87	25.17	25.64	24.63	27.93	26.37	23.63
K2C74_HUMAN	Q7RTS7	Keratin, type II cytoskeletal 74	4	0.0312635	0.856364	0.896943	25.98	27.33	27.32	25.96	26.04	26.32	27.12	26.69	26.69	26	27.06	26.81	26.78	27.13	25.74	25.75	26.24	26.95	27.99	26.96	27.46	26.54	23.35	26.19	26.03	26.38	26.35	24.02	27.01	26.96	26.26	24.84	25.86	25.81	28.37	26.72	23.63
K2C75_HUMAN	O95678	Keratin, type II cytoskeletal 75	22	0.19293	0.25959	0.396175	24.7	26.04	25.86	24.69	25.57	25.81	26.41	25.89	24.02	24.7	26.01	25.68	25.97	25.23	25.61	25.51	25.66	25.91	24.31	24.35	26.04	24.06	23.41	23.9	24.4	25.34	22.91	24.13	25.39	24.52	23.29	23.63	25.99	24.68	27.07	25.85	21.12
K2C78_HUMAN	Q8N1N4	Keratin, type II cytoskeletal 78	31	0.232605	0.172194	0.29553	22.92	23.16	23.14	22.09	22.84	22.49	23.21	22.46	22.86	21.41	23.37	23.09	23.21	22.37	22.08	22.6	23.64	23.86	23.26	22.64	22.58	22.76	22.35	22.93	23.01	23.23	22.95	23.34	23.79	21.08	22.84	22.66	23.4	21.65	24.28	23.56	26.17
K2C79_HUMAN	Q5XKE5	Keratin, type II cytoskeletal 79	12	0.302031	0.0734052	0.174344	25.08	26.45	25.83	23.91	25.54	25.96	26.42	25.96	24.59	24.99	26.33	26.07	25.8	24.93	25.4	25.42	25.46	25.76	24.66	24.08	26.11	22.98	22.33	23.04	24.31	24.69	23.28	23.6	25.57	25.42	23.02	23.16	26.31	25.4	27.59	25.86	15.25
K2C7_HUMAN	P08729	Keratin, type II cytoskeletal 7	7	-0.0170366	0.921441	0.944286	23.86	26.07	25.39	24.57	24.61	25.16	25.86	25.33	24.02	23.85	25.73	25.18	24.43	26.2	24.37	24.64	24.63	25.48	26.52	23.62	25.55	24.56	22.06	23.99	23.16	24.82	23.99	23.93	25.44	23.34	19.79	20.5	25.33	21.91	26.68	24.23	20.25
K2C80_HUMAN	Q6KB66	Keratin, type II cytoskeletal 80	6	0.229282	0.17858	0.297233	21.7	21.43	21.73	17.85	19.52	21.04	20.71	19.59	22.49	19.9	22.74	22.04	21.26	20.46	17.92	20.57	18.49	20.86	18.99	18.1	21.04	18.36	19.49	20.51	20.88	21.18	22.71	22.47	21.68	19.1	17.44	15.81	22.14	17.21	20.99	20.97	20.25
K2C8_HUMAN	Q6P4C7	Keratin, type II cytoskeletal 8	9	-0.0139973	0.935423	0.954671	24.23	25.28	24.77	24.49	24.54	24.82	25.55	25.07	24.28	23.54	24.71	24.87	24.65	24.73	24.16	24.43	24.53	25.04	25.23	23.55	25.02	24.07	22.71	23.68	23.45	25.04	24.87	23.71	24.24	23.1	21.46	21.01	25.43	23.05	25.5	24.55	21.49
KCY_HUMAN	P30085	UMP-CMP kinase	2	0.353928	0.0341997	0.109249	19.89	14.15	15.64	18.43	19.65	18.31	19.81	14.43	20.03	19.62	16.11	20.29	20.16	14.61	19.51	19.62	19.8	20.42	17.59	17.61	14.36	19.52	15.86	13.55	15.65	15.74	20.52	18.94	17.64	17.46	19.4	19.98	19.68	19.73	19.85	19.41	21.42
KLK10_HUMAN	O43240	Kallikrein-10	4	0.0957125	0.5787	0.701797	20.97	20.04	14.71	22.46	21.66	19.22	20.48	20.52	21.09	15.2	20.96	20.42	19.89	22.61	22.83	20.88	22.99	23	17.07	18.26	20.35	21.48	19.75	20.68	22.16	21.2	21.27	21.1	22.33	21.75	21.59	20.53	22.03	20.48	22.19	21.79	22.66
KLK1_HUMAN	P06870	Kallikrein-1	2	-0.112979	0.511788	0.655935	25.48	26.04	26.14	22.16	22.95	24.23	22.5	23.19	23.39	24.05	22.86	24.71	23.73	24.91	23.17	23.3	23.84	23.07	24.65	25.3	23.64	24.49	24.2	23.04	23.49	25.23	24.19	23.44	22.49	24.57	23.02	24.76	24.06	23.29	20.66	23.65	13.31
KPYM_HUMAN	Q9BWB5	Pyruvate kinase isozymes M1/M2	22	0.311231	0.06465	0.164443	22.11	22.25	22.37	17.95	21.41	21.18	22	20.72	20.71	21.53	21.57	22.05	21.78	20.51	22.56	21.79	22.45	21.74	19.58	19.74	21.63	21.3	21.07	21.19	22.41	21.64	20.7	21.58	21.91	18.5	20.04	19.99	22.18	19.36	22.29	22.08	24.58
KPYR_HUMAN	P30613	Pyruvate kinase isozymes R/L	2	0.462508	0.00450941	0.0385633	23.12	23.11	23.47	17.56	21.99	22.03	22.76	22.01	22.21	22.51	22.62	23.04	22.8	21.69	23.16	22.52	22.32	22.43	21.74	18.61	21.98	18.34	18.33	18.41	23.38	18.63	17.73	18.66	22.13	21.92	21.73	22.59	22.26	22.5	22.78	22.61	22.15
KRT36_HUMAN	O76013	Keratin, type I cuticular Ha6	2	0.107891	0.531098	0.66654	23.54	17.54	19.42	17.43	21.53	9.24	20.59	19.17	22.86	13.25	23.85	23.75	24.06	8.43	19.08	17.06	14.87	15.66	21.09	13.53	13.55	22.04	21.8	22.38	21.55	22.95	22.61	21.03	20.68	19.86	17.29	17.32	22.16	12.73	12.02	20.95	17.61
KRT84_HUMAN	Q9NSB2	Keratin, type II cuticular Hb4	5	-0.00175236	0.991907	0.991907	23.51	24.08	24.86	24.51	23.71	22.62	24.68	20.64	22.61	21.48	25.17	24.47	23.49	24.69	23.75	23.78	24.49	25.21	24.81	22.59	26.24	24.42	21.12	24.12	24.19	24.67	23.76	21.56	25.89	23.58	22.52	18.78	24.59	22.07	26.32	22.66	26.67
KTDAP_HUMAN	P60985	Keratinocyte differentiation-associated protein	2	0.251699	0.138645	0.257414	17.54	15.33	20.04	17.5	20.53	15.34	19.92	16.31	17.03	18.73	12.67	19.97	21.18	10.44	21.65	19.86	21.28	21.44	12.23	14.61	16.01	16.48	19.17	13.77	18.55	16.6	20.28	11.65	15.21	15.36	14.74	13.78	19.71	18.37	20.21	15.25	20.52
KV104_HUMAN	P01596	Ig kappa chain V-I region CAR	2	0.338681	0.0433291	0.127167	22.72	22.05	22.27	19.17	18.54	19.96	17.06	17.77	17.4	23.26	19.83	21.77	22.57	11.3	16.87	20.49	19.74	17.38	19.38	16.96	22.44	17.61	17.56	18.18	18.54	15.88	18.88	20.41	16.53	20	17.23	21.57	23.22	23.31	23.44	22.94	19.93
KV106_HUMAN	P01598	Ig kappa chain V-I region EU	2	0.0387869	0.822296	0.88665	29.58	16.88	18.15	21.5	21.48	20.61	18.86	19.39	19.95	22.44	21.37	22.22	19.09	22.31	22.83	22.1	21.91	21.95	22.42	21.62	23.15	22.54	21.8	18.62	21.99	20.63	21.57	17.33	20.15	22.32	20.18	22.06	24.17	23.51	21.69	23.59	25.26
KV108_HUMAN	P01600	Ig kappa chain V-I region Hau	2	0.268827	0.11288	0.227596	23.55	23.18	23	20.25	19.38	21.22	19.29	18.73	17.6	23.5	20.01	21.95	22.85	11.94	17.92	21.41	20.55	18.67	20.87	17.76	23.27	18.39	18.21	18.76	18.63	16.41	19.41	20.82	17.08	20.43	17.59	21.98	23.98	23.94	24.29	23.59	20.96
KV109_HUMAN	P01601	Ig kappa chain V-I region HK101	2	0.268827	0.11288	0.227596	23.55	23.18	23	20.25	19.38	21.22	19.29	18.73	17.6	23.5	20.01	21.95	22.85	11.94	17.92	21.41	20.55	18.67	20.87	17.76	23.27	18.39	18.21	18.76	18.63	16.41	19.41	20.82	17.08	20.43	17.59	21.98	23.98	23.94	24.29	23.59	21.72
KV110_HUMAN	P01602	Ig kappa chain V-I region HK102	2	0.0387869	0.822296	0.88665	29.58	16.88	18.15	21.5	21.48	20.61	18.86	19.39	19.95	22.44	21.37	22.22	19.09	22.31	22.83	22.1	21.91	21.95	22.42	21.62	23.15	22.54	21.8	18.62	21.99	20.63	21.57	17.33	20.15	22.32	20.18	22.06	24.17	23.51	21.69	23.59	21.2
KV117_HUMAN	P01609	Ig kappa chain V-I region Scw	2	0.268827	0.11288	0.227596	23.55	23.18	23	20.25	19.38	21.22	19.29	18.73	17.6	23.5	20.01	21.95	22.85	11.94	17.92	21.41	20.55	18.67	20.87	17.76	23.27	18.39	18.21	18.76	18.63	16.41	19.41	20.82	17.08	20.43	17.59	21.98	23.98	23.94	24.29	23.59	21.31
KV123_HUMAN	P04431	Ig kappa chain V-I region Walker	2	0.268827	0.11288	0.227596	23.55	23.18	23	20.25	19.38	21.22	19.29	18.73	17.6	23.5	20.01	21.95	22.85	11.94	17.92	21.41	20.55	18.67	20.87	17.76	23.27	18.39	18.21	18.76	18.63	16.41	19.41	20.82	17.08	20.43	17.59	21.98	23.98	23.94	24.29	23.59	24.22
KV201_HUMAN	P01614	Ig kappa chain V-II region Cum	2	-0.264624	0.118841	0.233909	22.59	23.89	23.72	23.91	23.18	23.35	23.08	23.11	23.02	23.69	23.57	23.38	22.56	24.93	25.07	24.79	24.7	24.95	24.65	24.28	24.73	24.14	23.85	23.52	24.6	24.23	21.81	25.18	23.95	24.76	22.08	21.48	24.81	20.92	23.54	26.33	23.56
KV204_HUMAN	P01617	Ig kappa chain V-II region TEW	2	-0.264624	0.118841	0.233909	22.59	23.89	23.72	23.91	23.18	23.35	23.08	23.11	23.02	23.69	23.57	23.38	22.56	24.93	25.07	24.79	24.7	24.95	24.65	24.28	24.73	24.14	23.85	23.52	24.6	24.23	21.81	25.18	23.95	24.76	22.08	21.48	24.81	20.92	23.54	26.33	20.68
KV205_HUMAN	P06309	Ig kappa chain V-II region GM607	2	-0.264624	0.118841	0.233909	22.59	23.89	23.72	23.91	23.18	23.35	23.08	23.11	23.02	23.69	23.57	23.38	22.56	24.93	25.07	24.79	24.7	24.95	24.65	24.28	24.73	24.14	23.85	23.52	24.6	24.23	21.81	25.18	23.95	24.76	22.08	21.48	24.81	20.92	23.54	26.33	28.5
KV206_HUMAN	P06310	Ig kappa chain V-II region RPMI 6410	2	-0.058629	0.734119	0.823808	18.39	21.99	19.85	21.77	22.65	22.79	22.41	22.57	24.21	23.38	22.94	23.21	20.71	22.74	23.88	23.35	21.89	23.66	22.88	22.3	23.39	22.62	22.37	20.83	22.88	22.9	20.71	24.89	22.56	23.33	21.38	21.62	23.88	20.71	22.41	22.58	25.94
KV302_HUMAN	P01620	Ig kappa chain V-III region SIE	4	0.277984	0.100677	0.216172	24.08	23.45	23.25	21.93	21.5	22.3	21.33	21.03	21.19	22.75	21.98	21.65	23.48	18.71	19.84	23.03	22.5	21.62	22.54	21.52	23.61	21.11	21.6	21.3	22.11	20.6	22.4	22.74	21.09	21.16	21.23	22.69	22.85	25.07	24.86	24.22	26.03
KV303_HUMAN	P01621	Ig kappa chain V-III region NG9	2	-0.0335958	0.845772	0.894463	23.15	20.61	17.85	21.91	22.19	22.11	22.05	21.9	22.81	20	20.68	19.32	20.59	23.68	20.36	22.36	20.79	19.47	21.26	21.16	23.15	17.26	21.94	20.66	21.56	20.93	19.05	18.81	21.21	16.98	19.54	18.62	20.26	23.54	23.85	23.53	20.1
KV304_HUMAN	P01622	Ig kappa chain V-III region Ti	3	0.266575	0.116045	0.231157	24.05	23.3	23.32	21.42	20.83	21.89	20.67	20.26	20.18	22.18	21.39	20.92	23.35	16.53	18.25	22.52	21.92	20.69	21.69	20.49	23.32	20	20.65	20.48	20.97	19.43	21.69	22.1	19.74	19.78	20.19	21.65	22	24.93	24.72	24.02	18
KV305_HUMAN	P01623	Ig kappa chain V-III region WOL	4	0.277984	0.100677	0.216172	24.08	23.45	23.25	21.93	21.5	22.3	21.33	21.03	21.19	22.75	21.98	21.65	23.48	18.71	19.84	23.03	22.5	21.62	22.54	21.52	23.61	21.11	21.6	21.3	22.11	20.6	22.4	22.74	21.09	21.16	21.23	22.69	22.85	25.07	24.86	24.22	20.98
KV307_HUMAN	P04206	Ig kappa chain V-III region GOL	3	0.266575	0.116045	0.231157	24.05	23.3	23.32	21.42	20.83	21.89	20.67	20.26	20.18	22.18	21.39	20.92	23.35	16.53	18.25	22.52	21.92	20.69	21.69	20.49	23.32	20	20.65	20.48	20.97	19.43	21.69	22.1	19.74	19.78	20.19	21.65	22	24.93	24.72	24.02	16.74
KV308_HUMAN	P04207	Ig kappa chain V-III region CLL	2	0.307595	0.0680062	0.168655	23.72	22.98	22.36	21.65	22.68	21.5	22.63	22.44	23.64	23.68	23.38	23.37	23.39	24.44	21.4	23.7	23.77	23.74	22.87	22.75	23.93	21.97	23.76	23.02	23.82	23.62	23.45	23.02	22.03	24	21.41	22.03	24.52	24.39	23.85	24.08	20.97
KV309_HUMAN	P04433	Ig kappa chain V-III region VG	3	0.279014	0.0993698	0.215376	23.5	23.22	23.24	20.94	20.46	21.7	20.31	19.84	19.52	23.4	21.1	22.48	22.91	16.22	19.59	21.74	21.19	20.08	22	20.3	23.03	20.12	20.13	20.15	21.01	18.86	20.85	21.54	19.45	21.87	19.51	22.84	24.04	24.24	24.52	23.66	21.18
KV310_HUMAN	P04434	Ig kappa chain V-III region VH	2	0.336986	0.0444553	0.128946	24.07	23.46	23.35	18.74	19.4	19.65	19.49	18.79	18.56	24.18	20.96	22.62	23.46	13.15	15.4	21.43	20.54	19.05	20.09	18.65	23.8	17.36	18.17	19.17	20.28	16.56	20.17	21.07	15.79	21.16	16.37	20.66	24.2	24.49	25.07	23.85	21.09
KV312_HUMAN	P18135	Ig kappa chain V-III region HAH	5	0.219753	0.197817	0.320645	23.55	22.14	20.93	21.54	21.31	21.94	21.17	20.88	21.22	22.45	21.08	21.01	22.21	19.3	20.18	22.42	21.39	20.15	21.67	20.74	23.31	19.03	21.09	20.54	21.37	19.88	20.69	20.86	20.4	20.16	19.93	21.59	22.85	24.19	24.37	23.78	21.16
KV313_HUMAN	P18136	Ig kappa chain V-III region HIC	5	0.219753	0.197817	0.320645	23.55	22.14	20.93	21.54	21.31	21.94	21.17	20.88	21.22	22.45	21.08	21.01	22.21	19.3	20.18	22.42	21.39	20.15	21.67	20.74	23.31	19.03	21.09	20.54	21.37	19.88	20.69	20.86	20.4	20.16	19.93	21.59	22.85	24.19	24.37	23.78	21.99
KV401_HUMAN	P06312	Ig kappa chain V-IV region	4	0.361021	0.0305238	0.105692	22.99	21.39	20.83	19.82	20.03	20.95	18.33	19.54	20.23	23.17	20.93	22.41	22.39	17.93	19.7	21.62	20.78	17.81	19.62	20.24	22.7	19.94	20.27	19.97	20.89	19.16	20.68	21.14	19.89	21.83	19.35	22.09	24.09	23.78	23.43	23.62	22.09
KV402_HUMAN	P01625	Ig kappa chain V-IV region Len	4	0.361021	0.0305238	0.105692	22.99	21.39	20.83	19.82	20.03	20.95	18.33	19.54	20.23	23.17	20.93	22.41	22.39	17.93	19.7	21.62	20.78	17.81	19.62	20.24	22.7	19.94	20.27	19.97	20.89	19.16	20.68	21.14	19.89	21.83	19.35	22.09	24.09	23.78	23.43	23.62	22.57
KV403_HUMAN	P06313	Ig kappa chain V-IV region JI	4	0.361021	0.0305238	0.105692	22.99	21.39	20.83	19.82	20.03	20.95	18.33	19.54	20.23	23.17	20.93	22.41	22.39	17.93	19.7	21.62	20.78	17.81	19.62	20.24	22.7	19.94	20.27	19.97	20.89	19.16	20.68	21.14	19.89	21.83	19.35	22.09	24.09	23.78	23.43	23.62	23.78
KV404_HUMAN	P06314	Ig kappa chain V-IV region B17	4	0.361021	0.0305238	0.105692	22.99	21.39	20.83	19.82	20.03	20.95	18.33	19.54	20.23	23.17	20.93	22.41	22.39	17.93	19.7	21.62	20.78	17.81	19.62	20.24	22.7	19.94	20.27	19.97	20.89	19.16	20.68	21.14	19.89	21.83	19.35	22.09	24.09	23.78	23.43	23.62	23.78
LAC6_HUMAN	P0CF74	Ig lambda-6 chain C region	3	0.137962	0.422317	0.58186	27.75	27.24	26.33	26.77	26.61	26.73	26.09	26.19	27.58	27.49	27	27.44	27.4	26.93	27.94	27.83	27.65	27.61	27.64	27.37	27.64	26.98	28.38	27.11	27.59	28.12	27.68	26.4	27.01	27.41	26.58	27.32	28.67	27.91	27.08	27.78	20.7
LAC7_HUMAN	A0M8Q6	Ig lambda-7 chain C region	3	0.137962	0.422317	0.58186	27.75	27.24	26.33	26.77	26.61	26.73	26.09	26.19	27.58	27.49	27	27.44	27.4	26.93	27.94	27.83	27.65	27.61	27.64	27.37	27.64	26.98	28.38	27.11	27.59	28.12	27.68	26.4	27.01	27.41	26.58	27.32	28.67	27.91	27.08	27.78	20.89
LC1L1_HUMAN	Q5VSP4	Putative lipocalin 1-like protein 1	5	0.0310885	0.857159	0.896943	23.55	22.79	23.23	24.59	24.86	24.7	25.35	24.52	25.71	24.72	25.52	26.18	26	25.08	24.43	22.68	24.55	24.1	22.09	21.81	27.04	27.21	27.04	26.48	24.9	27.01	25.95	24.51	24.21	23.1	25.19	24.98	23.1	25.58	25.14	24.73	21.07
LCN1_HUMAN	P31025	Lipocalin-1	13	0.0412043	0.811414	0.88665	22.15	23.46	22.5	23.44	24.48	23.99	24.61	23.94	24.62	24.92	25.31	25.44	24.94	24.1	24.38	23.04	24.15	24.03	21.87	21.18	26.72	26.28	26.32	26.18	25.39	26.61	24.43	23.32	24.3	22.2	23.59	22.37	22.36	24.65	24.26	24.64	22.97
LDHA_HUMAN	P00338	L-lactate dehydrogenase A chain	10	0.436142	0.00783458	0.0555375	21.32	21.38	21.26	17.66	20.32	19.39	20.3	18.55	19.64	22.03	21.84	19.06	21.99	19.42	22.45	21.06	20.04	23	17.44	16.47	20.71	19.01	17.34	17.67	19.59	20.63	18.75	18.32	20.48	18.64	17.53	18.81	21.06	18.99	21.39	19.4	24.63
LEG3_HUMAN	P17931	Galectin-3	4	0.489085	0.00246995	0.0290628	22.56	21.6	19.76	19.58	21.11	18.53	21.24	18.96	22.48	21.95	22.05	21.5	22.34	20.84	22.25	21.19	22.08	22.3	20.33	19.45	21.87	22.09	20.41	19.01	22.25	21.63	22.02	20.28	22.16	20.13	19.88	22.74	21.7	21.06	22.75	22.13	24.99
LEG7_HUMAN	P47929	Galectin-7	11	-0.0361772	0.834081	0.889686	24.04	23.68	22.6	22.79	23.7	23.59	24.15	23.87	23.83	23.51	24.05	23.43	24.3	23.97	24.69	24.06	24.84	24.36	23.71	24.26	23.81	24.23	23.59	24.23	24.52	24.57	24.29	23.52	24.3	24.4	23.31	24.25	24.17	23.58	23.26	23.62	20.99
LG3BP_HUMAN	Q08380	Galectin-3-binding protein	11	-0.0843002	0.624968	0.738057	22.76	20.22	20	24.09	23.8	23.53	23.66	23.56	22.45	21.49	21.23	22.16	21.16	21.97	22.97	22.97	22.48	23.48	21.74	21.45	22.94	21.85	20.73	20.97	21.18	20.3	22.05	20.31	20.58	21.19	21.56	21.34	23.44	23.22	22.49	21.79	20.99
LKHA4_HUMAN	P09960	Leukotriene A-4 hydrolase	3	0.25671	0.130697	0.246485	22.08	16.91	21.64	15.94	15.14	18.11	17.79	20.74	22.67	22.13	14.76	21.08	14.84	12.98	20.69	15.68	22.57	14.18	15.77	9.33	15.82	14.4	20.79	14.62	16.44	16.44	14.9	17.63	16.75	11.31	16.28	24.08	16.02	13.18	19.01	15.92	17.83
LMNA_HUMAN	P02545	Lamin-A/C	14	0.436121	0.00783795	0.0555375	20.6	18.96	20.31	20.01	20.39	19.64	21.13	18.62	20.98	21.03	21.22	21.86	20.49	19.11	20.96	22.03	22.27	21.7	19.85	19.99	17.37	21.56	20.41	20.63	20.92	20.96	20.73	21.03	19.46	15.99	19.6	20.72	20.15	19.65	22.52	21.32	22.16
LPLC1_HUMAN	Q9H4V6	Long palate, lung and nasal epithelium carcinoma-associated protein 1	20	0.213015	0.212266	0.339626	25.76	16.99	21.1	21.92	22.4	22.06	22.98	21.96	23.42	22.69	22.88	23.28	24.25	19.99	21.17	19.12	22.53	20.29	17.62	17.38	25.35	22.64	22.92	21.55	20.82	21.64	22.04	21.15	22.3	22.53	22.5	19.52	21.47	24.69	25.95	22.97	24.62
LV102_HUMAN	P01700	Ig lambda chain V-I region HA	2	-0.376373	0.0236693	0.0939198	18.65	16.57	16.49	15.85	21.67	20.92	21.25	19.7	19.41	16.45	14.34	20.87	15.27	22.74	22.53	19.58	17.13	22.08	24.39	21.87	21.06	18.41	19.24	20.07	22.7	21.56	19.96	16.11	21.36	25.1	17.99	18.28	23.2	18.92	22.06	17.26	21.82
LV106_HUMAN	P04208	Ig lambda chain V-I region WAH	2	-0.376373	0.0236693	0.0939198	18.65	16.57	16.49	15.85	21.67	20.92	21.25	19.7	19.41	16.45	14.34	20.87	15.27	22.74	22.53	19.58	17.13	22.08	24.39	21.87	21.06	18.41	19.24	20.07	22.7	21.56	19.96	16.11	21.36	25.1	17.99	18.28	23.2	18.92	22.06	17.26	21.56
LYSC_HUMAN	P61626	Lysozyme C	9	0.09675	0.574571	0.700214	26.06	25.13	24.72	24.86	25.02	23.62	26.33	25.72	26.12	26.11	26.55	25.96	26.57	27.95	25.66	25.72	26.44	26.53	26.08	25.89	28.36	26.78	26.29	21.84	26.31	24.34	25.29	23.8	24.18	24.8	20.87	23.89	26.8	24.01	28.47	26.11	20.24
MDHM_HUMAN	P40926	Malate dehydrogenase, mitochondrial	7	0.0855231	0.619937	0.735619	18.84	18.45	20.86	18.89	19.98	19.22	19.21	19.64	19.21	18.63	20.83	19.05	20.24	20.59	22.3	20.55	20.3	21.43	18.17	18.96	18.58	20.3	20.04	21.15	21.87	21.82	20.41	19.27	20.41	18.44	18.21	20.3	19.79	18.98	18.72	19.75	21.72
ML12A_HUMAN	P19105	Myosin regulatory light chain 12A	3	0.454151	0.00539724	0.0424926	22.28	21.23	22.94	20.52	21.41	21.57	21.98	21.78	21.84	21.74	19.93	22.06	22.33	19.02	20.58	21.65	21.69	20.83	19.65	18.66	18.54	19.96	21.62	18.78	19.81	21.28	21.48	21.59	22.73	17.02	21.11	20.22	21.6	21.71	22.84	21.11	18.21
MMP9_HUMAN	P14780	Matrix metalloproteinase-9	4	0.522433	0.00108109	0.0162491	22.92	22.2	22.42	14.02	15.54	17.37	10.38	18.25	16.8	22.94	19.94	17.06	20.9	21.79	21.79	15.36	18.87	20.03	15.59	14.79	5.51	12.3	11.6	17.6	17.85	9.74	13.24	14.21	12.34	12.16	11.43	15.03	16.84	14.21	21.65	16.1	16
MOES_HUMAN	P26038	Moesin	8	0.361138	0.0304657	0.105692	22.26	21.22	20.79	17.01	18.88	16.68	20.5	19.39	16.51	21.25	18.74	21.16	19.83	18.99	21.1	18.64	19.74	19.53	17.44	17.81	20.49	17.67	18.64	17.85	21.3	19.75	18.83	20.04	18.63	18.15	18.42	19.03	20.91	20.69	22.41	19.75	25.85
MUC5B_HUMAN	Q7M4S5	Mucin-5B	25	-0.212136	0.214204	0.341624	25.41	24.34	25.15	24.72	24.67	24.43	24.6	24.46	24.67	24.43	24.35	24.5	24.61	23.95	24.7	24.12	24.45	24.71	24.99	24.67	25.22	24.91	24.36	25.13	24.18	24.6	24.11	25.24	24.48	24.41	24.19	24.44	24.36	23.75	25.59	24.63	21.35
MUC7_HUMAN	Q8TAX7	Mucin-7	8	0.118691	0.490535	0.638597	24.17	22.37	23.31	24.62	22.25	22.84	22.32	23.28	25.49	22.71	24.83	24.22	23.45	25.21	23.25	23.82	22.59	22.15	23.7	24.31	24.06	23.19	23.36	23.78	24.44	23.42	23.63	24.78	23.98	24.5	22.33	22.52	25.67	24.43	24.09	25.18	25.74
MUCB_HUMAN	P04220	Ig mu heavy chain disease protein	5	0.310786	0.0650531	0.164624	23.47	21.18	18.68	21.99	22.15	21.92	21	21.98	22.47	23.22	21.42	22.54	22.9	22.59	18.87	24.36	24.02	22.23	24.3	21.09	22.38	23.92	15.79	16.81	16.57	15.78	18.76	22.01	22.37	23.26	21.74	22.61	24.85	23.81	23.4	23.87	25.64
MYG_HUMAN	P02144	Myoglobin	6	0.472546	0.00361236	0.0338063	19.82	25	25.41	13.77	16.31	17.32	23.15	15.79	24.09	21.44	22.11	21.66	25.86	14.72	19.07	21.33	18.93	21.88	19	12.9	21.64	19.98	18.67	15.49	17.58	16.68	15.2	14.69	13.72	19.08	17.63	20.3	19.76	21.11	24.87	16.04	21.96
MYH10_HUMAN	P35580	Myosin-10	2	0.48365	0.0028044	0.0309108	21.87	21.32	22.24	16.9	19.83	19.52	20.54	18.5	22.17	21.09	15.09	21.67	21.44	19.3	19.61	21.37	21.59	21.79	17.21	15.57	15.39	19.88	19.88	19.31	19.16	19.86	21.85	20.93	17.3	17.18	18.36	20.73	21.58	21.49	22.26	21.21	16.87
MYH11_HUMAN	P35749	Myosin-11	2	0.48824	0.00251956	0.0290628	21.8	21.86	20.33	19.76	20.52	20.45	19.75	19.49	19.17	18.69	22.1	21.59	21.28	21.35	21.05	21.88	21.69	22.89	17.9	18.47	19	20.19	20.16	21.68	21.19	21.31	21.51	20.28	20.66	16.75	17	18.99	21.36	21.4	22.26	19.93	19.67
MYH14_HUMAN	Q9H882	Myosin-14	2	0.48824	0.00251956	0.0290628	21.8	21.86	20.33	19.76	20.52	20.45	19.75	19.49	19.17	18.69	22.1	21.59	21.28	21.35	21.05	21.88	21.69	22.89	17.9	18.47	19	20.19	20.16	21.68	21.19	21.31	21.51	20.28	20.66	16.75	17	18.99	21.36	21.4	22.26	19.93	26.24
MYH9_HUMAN	P35579	Myosin-9	24	0.577166	0.000228517	0.00911802	18.35	19.81	20.05	14.34	16.92	16.05	16.93	15.32	17.75	17.88	16.14	18.4	17.54	16.04	17.85	19.74	19.74	19.07	14.4	13.17	13.11	16.35	16.98	16.89	18.57	18.27	18.14	15.12	16.19	12.49	15.7	16.06	19.66	17.79	21.13	17.1	22.39
MYL6_HUMAN	P60660	Myosin light polypeptide 6	5	0.396993	0.0165144	0.0812406	22.81	23.2	23.88	22.21	22.54	22.29	22.79	22.75	22.66	22.58	22.89	22.72	22.91	22.63	22.85	23.06	22.87	22.52	21.74	22.38	22.32	22.5	22.8	23.02	22.74	22.76	23.18	22.63	22.64	22.16	22.57	22.08	22.61	22.63	23.17	22.71	23.49
NAMPT_HUMAN	P43490	Nicotinamide phosphoribosyltransferase	3	0.472987	0.0035768	0.0338063	20.81	20.49	20.27	18.52	19.28	19.68	18.46	18.84	20.67	20.9	21.07	20.87	21.12	16.65	21.27	21.6	20.13	20.85	16.12	17.72	15.97	19.48	17.52	19.76	20.97	21.92	21.27	18.77	20.49	20.65	17.63	18.09	19.81	18.55	19.88	19.74	15.33
NCRP1_HUMAN	Q6ZVX7	Non-specific cytotoxic cell receptor protein 1 homolog	4	-0.0116725	0.946131	0.962245	19.7	17.43	16.29	17.61	19.2	18.63	20.8	17.95	18.25	19.4	19.52	17.62	20.7	16.1	18.82	19.04	18.51	17.18	18	18.82	17.17	19.05	18.43	19.4	17.33	18.99	19.43	18.88	20.15	18.11	18.85	17.96	19.65	17.11	18.59	20.28	23.75
NDK8_HUMAN	O60361	Putative nucleoside diphosphate kinase	2	0.10797	0.530795	0.66654	22.8	21.54	21.23	21.02	21.73	20.86	21.83	20.17	22.81	22.4	22.45	22.09	20.17	20.82	22.87	21.71	22.41	20.96	19.14	22.89	21.87	21.78	21.84	22.22	21.98	22.3	22.67	20.24	20.88	21.03	20.91	20.95	21.94	20.7	21.8	22.29	18.83
NDKA_HUMAN	P15531	Nucleoside diphosphate kinase A	3	0.220815	0.195605	0.319145	22.63	20.8	19.97	20.79	21.79	21.58	21.83	21.26	22.6	21.58	22.69	22.38	22.69	22.09	22.91	21.91	22.48	22.49	21.56	21.12	22.39	22.54	21.14	22.55	23.18	22.21	23.07	21.59	22.23	20.78	20.66	21.82	22.04	21.2	22.15	22.57	23.43
NDKB_HUMAN	P22392	Nucleoside diphosphate kinase B	5	0.387004	0.0197132	0.0850239	22.38	19.99	19.27	19.95	21.18	20.57	21.12	20.41	22.51	21.38	21.42	21.87	21.45	21.03	22.38	21.43	21.97	21.31	19.96	20.4	20.24	21.54	20.86	19.8	21.19	21.62	22.59	20.5	19.75	19.88	20.38	21.2	21.58	20.81	21.62	21.89	23.59
NDRG1_HUMAN	Q92597	Protein NDRG1	2	0.230791	0.17566	0.295901	18.26	15.96	16.47	14.71	19.71	11.89	18.46	20.6	22.14	17.06	15.12	18	20.86	19.04	17.22	20.64	20.69	21.18	18.76	17.84	19.51	17.27	19.33	17.11	14.53	15.99	21.65	18.32	16.5	15.95	19.06	17.41	19.61	16.51	19.83	20.1	22.98
NGAL_HUMAN	P80188	Neutrophil gelatinase-associated lipocalin	8	0.495246	0.00213346	0.0271333	21.93	23.04	23.66	15	19.04	19.42	16.48	19.16	17.34	22.52	16.98	23.56	20.06	15.34	21.49	19.53	17.03	19.47	18.77	18.13	16.99	13.6	14.55	14.69	15.33	16.57	17.26	18.58	15.01	12.58	19.08	18.11	18.8	21.88	24.03	18.3	21.03
NIBL1_HUMAN	Q96TA1	Niban-like protein 1	6	0.168541	0.325798	0.471125	18.93	19.74	18.34	18.2	21.02	19.48	21.01	18.48	21.76	19.81	21.6	21.04	21.45	20.13	21.26	20.9	20.72	21.77	21.01	21.04	19.2	21.08	21.21	21.48	21.77	21.38	22.13	21.27	20.96	19.35	21.24	21.13	20.97	18.96	20.55	21.03	18.71
NUCB2_HUMAN	P80303	Nucleobindin-2	2	-0.0369335	0.830662	0.889686	22.79	21.17	21.55	23.43	22.57	22.01	22.31	22.64	22.59	22.2	22.48	22.43	22.22	23.3	22.68	23.03	22.83	22.82	22.9	22.25	22.88	22.7	21.7	21.5	20.92	21.52	21.27	22.47	22.47	21.91	22.11	22.32	21.89	22.13	20.62	21.76	15.93
OTUB1_HUMAN	Q96FW1	Ubiquitin thioesterase OTUB1	2	0.162877	0.342554	0.492484	16.56	20.23	17.35	13.04	14.44	18.77	19.36	11.31	18.58	14.1	17.25	20.18	19.98	12.33	14.77	20.66	21.06	20.66	15.49	14.95	14.79	17.54	17.09	16.61	20.81	18	20.55	18.7	19.94	15.93	19.16	16.06	19.97	10.08	13.39	18.46	18.46
PCBP1_HUMAN	Q15365	Poly(rC)-binding protein 1	2	0.419738	0.0108197	0.0654457	21.61	20.66	20.46	17.49	21.62	20.9	21.49	20.65	22.22	20.62	22	21.16	21.97	21.06	21.66	21.26	21.55	22.18	20.03	18.17	20.61	20.66	21.19	21.48	21.73	21.64	21.93	21.14	21.56	16.07	20.08	20.29	21.31	21.22	20.51	21.29	16.81
PDIA1_HUMAN	P07237	Protein disulfide-isomerase	20	0.268122	0.113865	0.228651	22.68	22.44	23.02	21.71	22.11	21.7	22.41	21.95	22.19	21.98	22.36	22.29	22.48	21.71	22.5	22.26	22.21	22.29	21.37	21.66	21.86	22.52	21.84	22.63	22.47	22.82	22.65	22.32	22.39	21.2	21.96	21.96	21.77	21.67	22.23	22.06	24.45
PDIA3_HUMAN	P30101	Protein disulfide-isomerase A3	6	0.305323	0.0701719	0.172093	20.58	21.47	21.45	20.08	20.73	21.19	21.54	20.44	21.46	20.94	20.67	20.73	21.8	21.13	21.91	21.43	21.56	21.69	20.24	20.26	20.77	21.47	21.1	21.32	21.46	21.48	21.86	20.81	20.99	20.11	20.44	20.55	21.27	21.62	21.73	21.31	22.97
PDIA6_HUMAN	Q15084	Protein disulfide-isomerase A6	3	0.135443	0.43092	0.586305	20.08	19	19.46	16.98	19.31	19.39	19.42	19.22	18.35	18.89	17.26	20.02	20.33	18.28	20.74	20.16	19.29	20.86	14.9	18.88	18.71	19.58	19.33	20.94	20.75	20.7	19.97	17.89	18.3	16.79	14.92	19.3	19.44	18.34	19.86	19.45	14.53
PEBP1_HUMAN	P30086	Phosphatidylethanolamine-binding protein 1	2	0.0321115	0.85251	0.896943	22.49	22.2	22.53	17.99	21.86	19.99	21.38	21.3	20.83	22.09	20.5	21.55	21.56	19.41	23.22	18.36	21.37	18.9	21.14	22.17	20.04	21.46	21.18	21.55	22.28	22.68	22.3	21.42	22.02	19.9	22.01	23.13	18.1	20.87	20.48	18.97	21.23
PEPL_HUMAN	O60437	Periplakin	52	0.235311	0.167117	0.290843	20.46	21.48	20.87	20.75	21.21	21	21.54	19.3	21.49	18.74	21.81	21.85	21.35	22.1	20.7	21.65	22	22.48	21.38	21.24	19.21	21.59	21.83	22.03	22.1	21.67	22.19	22.3	22.15	19.11	21.34	21.53	21.7	20.57	21.92	21.72	24.19
PERL_HUMAN	P22079	Lactoperoxidase	16	-0.119536	0.487431	0.636226	21.49	19.98	19.73	24.03	23.26	23.75	23.79	23.38	23.1	22.42	21.87	22.36	21.79	22.38	20.79	22.93	22.56	22.57	21.76	20.69	22.61	22.31	21.49	21.33	19.5	21.86	21.14	22.8	20.4	22.16	22.39	21.21	22.87	22.86	20.76	22.14	21.71
PERM_HUMAN	P05164	Myeloperoxidase	23	0.477766	0.00321033	0.0327263	22.57	22.01	22.12	16.51	19.44	19.51	19.78	20.25	18.61	22.41	19.33	21.94	20.03	18.44	19.92	18.15	16.62	16.79	13.68	15.31	17.32	14.55	13.62	13.08	14.52	12.94	15.1	13.32	16.01	14.6	13.58	14.68	19.42	20.33	23.25	19.35	24.99
PGAM1_HUMAN	P18669	Phosphoglycerate mutase 1	9	0.308965	0.0667254	0.166311	20.99	21.98	22.01	20.97	21.33	20.86	21.95	20.77	20.84	22.17	21.11	22.06	22.01	20.58	22.36	21.83	21.82	22.06	20.47	20.55	20.18	21.6	20.87	22.24	22.29	22.58	21.96	20.41	21.95	20.48	20.28	20.03	21.73	21.47	21.78	21.18	24.12
PGAM2_HUMAN	P15259	Phosphoglycerate mutase 2	4	0.148277	0.38811	0.540738	20.76	22.23	22.1	21.12	21.44	20.53	22.27	20.42	19.86	22.47	20.52	22.25	22.19	20.26	22.77	22.01	22.25	22.81	20.16	21.86	20.44	21.94	20.33	22.5	22.61	23	21.86	20.05	22.06	20.09	19.26	18.62	22.1	21.43	22.1	21.09	24.69
PGAM4_HUMAN	Q8N0Y7	Probable phosphoglycerate mutase 4	6	0.216022	0.205731	0.331306	20.76	22.15	23.02	20.89	21.4	21.46	21.97	20.91	20.73	22.43	20.82	22.18	22.07	20.51	22.41	22.04	21.73	21.97	20.25	20.41	19.78	21.71	21.63	22.53	22.46	22.58	22.01	20.23	22.17	21.29	20.82	19.52	21.81	21.51	21.62	20.89	21.09
PGK1_HUMAN	P00558	Phosphoglycerate kinase 1	14	0.43004	0.00885021	0.0593203	21.27	21.36	20.46	19.27	20.53	20.38	21.2	19.88	22.22	21.07	21.46	21.69	22.09	19.99	22.33	19.73	21.76	21.82	20.27	20.02	20.69	21.27	21.54	21.49	22.48	20.49	21.32	19.56	21.83	19.66	20.06	21.56	21.42	20.56	22.12	20.06	22.86
PGK2_HUMAN	P07205	Phosphoglycerate kinase 2	3	0.0868769	0.614388	0.73254	19.43	22.7	22.99	18.93	19.28	18.78	21.65	17.95	26.82	18.56	22.22	21.71	22.15	22.8	22.76	16.2	22.15	22.46	21.18	19.49	21.84	21.68	23.29	21.37	22.57	22.03	19.68	19.21	22.07	19.02	17.86	19.53	21.97	14.98	23.08	17.06	23.7
PIGR_HUMAN	P01833	Polymeric immunoglobulin receptor	25	0.233514	0.170476	0.293908	25.41	24.5	22.25	23	24.06	25.18	22.91	23.2	24.46	24.62	23.96	23.76	24.13	25.26	24.59	25.17	22.84	23.79	24.54	22.04	24.98	22.28	21.89	22.01	23.63	20.69	21.95	22.31	22.81	24.21	20.54	23.34	26.04	24.38	24.62	24.22	27.78
PIP_HUMAN	P12273	Prolactin-inducible protein	9	-0.0109999	0.949231	0.96282	26.11	25.62	25.98	25.89	25.11	25.24	26.24	26.09	26.02	26	26.84	25.8	26.8	27.01	25.76	25.53	25.69	25.51	26.1	25.88	26.03	25.44	25.35	25.78	26.75	25.93	25.61	25.01	25.91	25.93	24.54	24.22	27.14	24.7	25.26	25.95	27.78
PKP1_HUMAN	Q13835	Plakophilin-1	18	0.391872	0.0180951	0.0829451	22.23	22.56	21.79	21.27	22.25	22.42	22.74	22.13	23.1	21.32	23.01	22.6	23.01	23.1	22.36	22.75	23.21	23.13	22.18	21.02	21.91	22.4	22.49	23.35	23.33	22.69	23.05	22.64	22.94	20.64	22.69	22.84	23.2	22.22	23.09	22.87	24.61
PKP3_HUMAN	Q9Y446	Plakophilin-3	3	0.350034	0.0363668	0.109249	14.67	16.22	16	15.66	18.2	17.24	18.43	16.95	17.87	13.65	21.29	19.5	20.71	20.93	18.69	20.25	20.51	20.82	18.63	18.07	15.29	16.95	16.86	18.72	20.75	16.47	20.78	19.42	21.97	15.18	17.82	15.75	19.99	17.09	20.07	20	22.61
PLAK_HUMAN	P14923	Junction plakoglobin	30	0.260145	0.125447	0.241169	23.03	22.56	22.28	21.93	22.81	22.74	23	22.02	22.93	21.85	22.84	22.79	23.2	23.24	22.44	23.1	23.41	23.62	22.55	22.33	21.96	23	22.86	22.74	23.35	23.05	24.24	22.75	23.01	21.19	22.77	22.81	24.02	22.36	22.98	23.19	21.99
PLIN3_HUMAN	O60664	Perilipin-3	4	0.360433	0.0308153	0.105692	19.17	18.15	15.79	19.16	19.04	18.07	20.5	16.85	21.43	18.93	21.69	21.49	21.36	16.24	17.82	19.07	17.63	20.94	18.18	17.68	17.42	20.52	18.96	20.54	20.18	21.19	21.64	16.5	19.37	17.98	19.26	19.78	19.62	20.63	20.72	21.75	22.42
PLSI_HUMAN	Q14651	Plastin-1	2	0.241228	0.15639	0.276048	16.41	16.52	16.23	18.63	20.02	17.64	19.74	18.91	21.63	17.22	21.73	21.27	22.22	16.97	21.3	20.96	21.98	22.33	18.96	20.09	15.76	20.94	21.43	21.11	22.15	21.74	22.84	21.42	22.07	20.67	21.41	20.74	20.67	18.42	21.22	20.52	19.45
PLSL_HUMAN	P13796	Plastin-2	10	0.313623	0.0625143	0.160659	21.11	21.94	22.84	18.02	20.4	19.71	16.98	20.09	19.02	20.51	16.79	20	20.11	16.01	21.34	15.55	15	13.18	10.39	16.01	15.45	14.31	13.64	15.38	18.07	12.65	15.07	15.7	11.34	13.94	11.96	15.34	17.55	18.88	20.55	17.86	22.97
PLST_HUMAN	P13797	Plastin-3	8	0.295633	0.0800207	0.185408	17.96	15.56	17.31	17.5	17.45	18.05	19.52	18.43	21.34	17.41	22.34	19.59	20.47	16.58	19.45	19.77	20.6	19.77	20.26	16.42	13.87	19.7	17.19	19.83	19.75	19.97	19.44	19.24	20.37	15.91	19.73	18.35	19.47	14.09	19.33	18.42	20.73
PNPH_HUMAN	P00491	Purine nucleoside phosphorylase	4	0.504727	0.00169385	0.0227068	21.83	21.11	21.29	15.81	19.52	18.73	17.16	18.15	20.24	21.67	20.06	18.49	21.79	17.91	21.94	21.27	21.05	20.72	18.6	16.58	17.77	17.94	17.93	19.58	20.68	19.15	20.33	18.06	20.09	17.74	16.66	19.72	21.67	18.04	21.78	21.51	20.73
POF1B_HUMAN	Q8WVV4	Protein POF1B	6	0.363605	0.0292676	0.105692	17.33	18.66	16.15	16.02	16.89	14.75	20.07	15.28	19.63	13.16	21.33	20.62	17.82	17.98	18.29	19.51	20.21	21.58	13.85	18.56	14.08	19.12	19	18	21.71	19.21	21.42	19.75	21.51	16.94	19.07	17.42	21.86	16.22	19.75	21.04	20.05
POTEE_HUMAN	Q6S8J3	POTE ankyrin domain family member E	18	0.476794	0.00328211	0.0327263	25.22	25.09	25.3	22.49	24.11	24.52	23.69	23.05	23.76	24.98	24.36	24.28	24.53	23.6	23.67	23.2	23.15	22.55	21.12	21.1	22.53	21.27	22.08	22.72	21.39	21.74	22.32	21.4	20.61	21.84	21.05	23.3	24	24.32	26.11	24.36	22.2
POTEF_HUMAN	A5A3E0	POTE ankyrin domain family member F	17	0.467177	0.0040707	0.03672	25.27	25.04	25.35	22.28	24.14	23.42	22.96	21.75	23.01	24.76	23.77	24.28	24.36	23.17	23.58	22.51	22.35	22.87	22.06	21.62	22.25	19.96	22.37	22.87	21.46	21.3	21.7	21.05	21.59	21.56	20.96	23.15	23.34	23.54	25.91	23.67	27.02
PPIA_HUMAN	P62937	Peptidyl-prolyl cis-trans isomerase A	9	0.184613	0.281085	0.418674	23.91	23.51	23.64	23.42	23.82	23.51	23.61	23.64	23.49	23.61	22.11	23.52	23.76	24.06	23.86	23.34	23.84	23.61	23.42	22.77	22.76	23.74	23.74	23.28	23.8	22.92	24.15	23.51	23.35	22.17	23.48	23.61	23.51	23.59	24.63	23.49	20.88
PPIB_HUMAN	P23284	Peptidyl-prolyl cis-trans isomerase B	7	0.0844018	0.624549	0.738057	20.45	19.67	19.15	21.38	21.69	21.33	20.83	21.17	21.99	22.07	20.45	22.04	21.73	20.93	21.5	21.63	22.09	21.83	20.49	19.02	21.98	21.94	21.33	21.63	21.41	21.39	21.73	20.3	21.06	21.38	20.37	19.78	21.77	20.84	21.17	22.44	23.55
PRB2_HUMAN	P02812	Basic salivary proline-rich protein 2	12	0.118102	0.492705	0.639743	12.49	24.94	25.74	25.85	24.69	24.22	26.26	25.82	24.94	16.87	21.98	24.74	15.23	21.75	26.2	25.89	26.95	27.01	17.24	12.39	20.16	14.79	24.54	25.67	17.49	16.93	16.72	22.96	16.12	24.98	23.09	17.56	26.25	23.75	22.64	26.33	21.57
PRB3_HUMAN	Q04118	Basic salivary proline-rich protein 3	9	-0.0185063	0.914687	0.939306	19.34	17.95	22.09	24.71	24.08	23.48	25.28	24.64	24.23	12.25	23.07	23.99	15.59	22.51	24.96	25.2	24.41	25.87	20.11	17.18	22.02	22.22	24.12	25.31	22.14	19.34	21.42	25.6	13.59	18.35	22.73	23.36	22.88	23.53	23.15	22.19	17.9
PRB4_HUMAN	P10163	Basic salivary proline-rich protein 4	3	0.39473	0.0171981	0.0812406	25.3	25.45	29.86	16.59	11.67	11.44	10.14	19.81	27.82	15.95	27.3	26.05	23.07	25.26	26.94	26.58	26.3	27.59	21.07	25.22	24.03	25.62	28.03	27.83	27.58	25.44	26.55	23.82	16.77	15.73	27.08	28.72	26.75	25.73	25.29	26.33	18.96
PRDX1_HUMAN	Q06830	Peroxiredoxin-1	12	0.158211	0.356744	0.507107	22.97	22.62	23.2	21.88	22.74	22.55	23.04	22.47	23.09	22.11	23.16	23.32	22.82	22.49	23.15	22.49	23.27	23	22.75	22.19	23.36	23.51	22.82	23.43	23.16	23.5	23.03	22.66	23.29	22.48	22.48	23.04	23.16	22.43	23.55	22.97	23.18
PRDX2_HUMAN	P32119	Peroxiredoxin-2	5	0.249131	0.142852	0.259843	20.36	22.78	22.78	21.18	21.22	21.18	21.33	22.71	21.44	22.33	23.11	22.94	22.59	20.2	22.78	22.51	23.03	23.18	18.68	21.88	22.58	22.36	21.93	22.49	23.44	20.24	20.72	21.63	22.84	25.41	21.09	22.24	22.56	20.36	23.21	21.49	24.9
PRDX5_HUMAN	P30044	Peroxiredoxin-5, mitochondrial	7	0.0923641	0.592115	0.714237	21.64	22.39	22.13	21.27	22.1	21.65	21.87	21.85	21.74	22.15	22.07	22.16	22.11	21.47	22.17	22.2	22.32	22.38	21.4	21.64	22.07	22.14	22.1	22.71	21.9	22.1	22.12	21.93	22.12	21.74	21.5	20.87	21.61	21.18	21.23	21.67	18.85
PRDX6_HUMAN	P30041	Peroxiredoxin-6	6	0.221366	0.194463	0.318329	22.11	21.84	21.77	21.27	21.59	21.43	20.97	21.52	22.19	21.5	21.05	21.97	22.29	22	21.57	21.62	22.14	21.48	21.53	20.99	20.53	22.07	22.41	21.99	21.39	22.37	22.69	22.07	22.2	22.07	21.9	22.08	21.98	21.58	21.13	22.09	22.14
PROF1_HUMAN	P07737	Profilin-1	10	0.0634478	0.713155	0.815034	22.58	23.31	22.03	22.37	23.25	23.14	22.62	23.12	22.05	23.03	21.97	22.58	22.66	22.17	22.98	22.18	22.88	22.13	20.36	21.87	22	22.3	21.42	22.3	22.26	22.65	21.3	20.45	20.25	21.93	20.51	20.88	22.91	21.47	22.91	21.91	25.18
PROL4_HUMAN	Q16378	Proline-rich protein 4	5	0.039949	0.817061	0.88665	19.12	11.65	13.19	23.12	22.04	19.78	20.59	22.59	19.19	17.44	23.56	21.83	19.62	23.43	21.59	20.17	22.95	20.23	16.58	16.53	26.77	23.3	14.26	22.02	14.69	15.54	12.91	21.65	11.19	15.32	13.94	17.83	16.5	18.65	23.73	17.15	26.33
PRP1_HUMAN	P04280	Basic salivary proline-rich protein 1	12	0.127407	0.459002	0.610362	13.86	22.96	25.15	25.95	24.47	22.68	26.55	24.22	24.68	12.25	24.74	23.21	16.48	23.66	25.52	25.05	24.47	27.13	16.77	14.03	18.36	14.56	22.78	23.29	20.03	12.81	13.78	22.87	14.02	23.91	21.18	18.27	23.6	20.48	22.28	23.55	22.55
PRPC_HUMAN	P02810	Salivary acidic proline-rich phosphoprotein 1/2	18	0.133384	0.438025	0.593607	20.04	19.79	23.44	24.58	26.17	22.06	26.2	26.93	25.23	16.61	25.41	23.95	21.52	23.65	25.09	24.85	23.88	24.92	18.81	18.44	22.38	20.58	25.64	25.78	22.45	17.24	21.95	26.75	13.47	22.57	23.64	22.91	23.22	26.53	23.11	22.97	21.82
PRTN3_HUMAN	Q9UQD8	Myeloblastin	4	0.36911	0.0267336	0.103593	21.7	22.74	23.08	18.91	19.37	20.21	20.6	19.82	21.74	23	16.89	21.83	19.12	15.16	21.87	18.6	18.95	17.42	16.43	16.22	18.33	14.51	13.19	14.92	14.6	15.41	14.07	21.18	17.91	19.35	16.46	15.2	21.95	21.36	23.61	17.22	21.67
PSA3_HUMAN	P25788	Proteasome subunit alpha type-3	3	0.194317	0.256115	0.393292	11.76	14.52	14.44	10.22	18.41	11.5	12.38	9.5	17.11	14.18	16.5	16.25	13.56	13.56	20.77	17.21	16.53	17.21	10.32	11.16	15.49	8.84	18.89	17.22	19.27	18.24	17.47	15.34	15.06	13.88	16.86	11.51	15.6	9.5	17.85	16	17.44
PSA_HUMAN	P55786	Puromycin-sensitive aminopeptidase	2	0.316312	0.06018	0.158803	20.95	20.02	20	18.05	20.14	16.11	19.14	12.91	21.77	20.33	21.27	20.26	21.36	16.1	21.14	20.82	20.92	21.58	19.33	19.76	19.27	20.56	20.25	21.02	21.44	21.11	21.53	20.64	21.07	17.51	20.38	23.61	21.08	17.4	21.04	20.74	23.65
PSME2_HUMAN	Q9UL46	Proteasome activator complex subunit 2	3	0.378879	0.0226819	0.092215	19.98	17.67	18.08	16.99	19.98	19.64	20.19	19.97	20.39	17.18	20.31	19.77	20.67	16.6	20.67	20.29	20.04	20.16	16.24	16.9	19.15	18.71	13.98	19.65	18.25	19.76	20.47	18.33	19.7	16.34	17.94	18.59	19.84	19.11	20.28	19.9	21.01
PYGL_HUMAN	P06737	Glycogen phosphorylase, liver form	4	0.183436	0.284218	0.422072	21.6	20.99	22	12.17	10.5	10.92	14.93	14.29	11.59	21.26	13.22	11.35	21.07	9.36	19.34	19.03	2.51	12.47	15.55	9.38	10.45	10.76	12.25	11.91	10.16	13.32	16.38	11.46	11.06	11.9	12.84	14.75	17.55	10.95	20.04	15.33	25.46
PZP_HUMAN	P20742	Pregnancy zone protein	5	0.231514	0.174273	0.295901	20.83	16.31	15.65	16.88	20.86	20.51	21.13	21.38	21.71	23.45	21.47	22.43	22.74	18.42	22.27	13.75	15.05	21.18	16.24	21.1	16.15	10.8	11.26	12.19	15.7	11.19	11.62	17.29	19.33	23.42	21.37	18.73	11.31	16.7	18.45	18	21.61
RAB10_HUMAN	P61026	Ras-related protein Rab-10	4	0.236973	0.164051	0.286513	19.51	21.41	17.27	20.61	18.92	20.88	19.71	20.48	21.97	20.53	21.73	21.63	22.17	22.38	19.94	21.83	17.69	22.31	21.4	21.13	20.22	21.6	18.25	20.91	22.04	20.01	21.04	20.87	21.73	20.08	20.66	19.56	21.41	21.64	19.88	20.96	23.07
RAB1A_HUMAN	P62820	Ras-related protein Rab-1A	2	0.0874781	0.611931	0.731368	20.42	22.11	10.77	19.01	18.15	20.73	21.18	17.47	17.98	18.56	18.89	22.41	19.37	20.55	21.04	22.41	22.65	21.67	20.18	17.82	20.66	16.81	16.21	21.67	21.33	19.03	20.03	20.47	18.71	22.75	19.97	18.69	22.16	21.44	18.12	22.19	21.58
RAB1B_HUMAN	Q9H0U4	Ras-related protein Rab-1B	3	0.210326	0.218229	0.344719	19.51	17.71	11.31	18.64	15.82	19.13	18.43	16.1	18.49	17.57	19.03	19.56	19.14	15.13	20.65	19.66	21.6	21.05	18.09	15.1	18.73	16.72	16.88	20.38	20.44	17.21	17.62	19.78	19.06	18.61	19.17	18.22	18.97	19.13	18.02	20.99	21.5
RAB1C_HUMAN	Q92928	Putative Ras-related protein Rab-1C	3	0.210326	0.218229	0.344719	19.51	17.71	11.31	18.64	15.82	19.13	18.43	16.1	18.49	17.57	19.03	19.56	19.14	15.13	20.65	19.66	21.6	21.05	18.09	15.1	18.73	16.72	16.88	20.38	20.44	17.21	17.62	19.78	19.06	18.61	19.17	18.22	18.97	19.13	18.02	20.99	21.46
RAB7A_HUMAN	P51149	Ras-related protein Rab-7a	3	0.261118	0.123989	0.239295	20.93	19.37	19.22	20.12	18.59	18.74	18.71	14.83	18.18	19.14	15.24	20.53	21.19	17.46	21.37	18.17	21.21	21.01	16.63	17.84	15.88	18.99	17.31	19.65	21.3	20.59	17.04	20.96	20.54	15.44	20.2	18.92	21.08	18.29	21.43	18.87	21.55
RABP2_HUMAN	P29373	Cellular retinoic acid-binding protein 2	2	0.0350293	0.839275	0.891093	21.46	22.13	18.25	19.56	21.32	19.8	21.91	16.82	22.18	21.13	16.05	17.74	21.95	17.32	23.53	20.67	22.42	22.78	16.98	18.8	16.44	19.13	21.2	22.34	22.57	22.06	22.53	20.34	22.34	18.61	21.46	22.79	18.68	18.24	18.88	20.77	20.95
RAC1_HUMAN	P63000	Ras-related C3 botulinum toxin substrate 1	2	0.421706	0.0104171	0.0654457	22.56	22.2	23.15	18.28	19.54	17.92	19.65	19.27	20.94	22.29	20.82	21.18	21.71	18.22	20.08	20.5	14.25	17.24	15.73	16.81	20.25	15.99	16.02	14.02	18.1	16.9	13.74	15.8	18.52	11.76	13.65	15.3	20.72	20.79	22.92	21.28	22.29
RAC2_HUMAN	P15153	Ras-related C3 botulinum toxin substrate 2	3	0.48262	0.00287207	0.0309685	22.41	19.91	20.33	15.63	15.64	18.31	18.3	14.97	21.18	22.01	15.42	21.42	21.52	17.51	15.06	16.9	13.42	14.38	14.99	12.39	16.28	14.57	12.44	12.58	18.39	14.36	14.66	16.3	17.24	13.28	14.47	13.31	18.71	20.85	22.56	20.69	23.74
RADI_HUMAN	P35241	Radixin	4	0.34382	0.040055	0.118258	23.13	21.06	20.13	22.5	20.73	18.87	21.79	21.17	22.91	21.43	22.72	22.23	20.38	21.92	21.89	21.85	23.1	20.81	19.98	19.19	22.8	21	19.53	22.9	23.38	20.94	23.33	22.71	20.58	22.03	22.2	22.38	22.49	22.94	23.33	22.59	24.93
RAN_HUMAN	Q9CWI7	GTP-binding nuclear protein Ran	4	0.374776	0.0243167	0.0949693	21.91	19.48	21.92	17.99	20.14	19.8	20.33	19.09	21.5	21.6	19.79	21.21	21.76	20.59	21.22	20.92	21.26	20.05	19.02	19.88	20.25	21.45	17.95	22.16	22	21.57	21.99	20.04	21.04	21.02	20.46	21.51	19.95	21.45	22.24	20.62	27.13
RINI_HUMAN	P13489	Ribonuclease inhibitor	2	0.192985	0.259452	0.396175	21.14	19.48	20.07	18.19	20.53	20.58	21.07	18.29	21.61	18.42	18.49	20.79	21.56	20.18	21.25	21	18.19	22.02	19.44	17.3	19.99	20.4	21.04	22.81	20.94	20.72	21.88	20.46	19.99	17.89	21.08	21.62	21.52	21.38	21.94	21.35	27.13
RL10_HUMAN	P27635	60S ribosomal protein L10	2	0.120861	0.482585	0.631562	17.71	14.05	14.45	15.88	16.71	19.3	19.22	9.94	19	15.55	18.71	20.51	20.53	20.76	22.41	17.69	20.97	21.36	18.13	17.92	16.15	19.95	15.49	16.1	20.73	20.7	20.57	16.83	20.85	13.07	14.92	16.45	19.83	13.28	18.69	18.85	22.34
RL11_HUMAN	P62913	60S ribosomal protein L11	2	0.329312	0.0498519	0.138913	18.49	19.11	19.89	16.57	20.89	16.6	17.97	20.38	19.72	18.89	18.28	21.23	21.51	16.93	21.72	22.23	22.87	21.89	18.97	19.85	19.4	19.01	20.57	19.6	17.86	22.07	22.69	21.17	21.75	16.36	21.43	21.82	21.73	18.48	21.45	21.3	24.89
RL3_HUMAN	P39023	60S ribosomal protein L3	3	0.325745	0.0525329	0.144757	20.91	18.28	19.36	18.51	20.96	19.94	20.69	19.7	21.81	19.51	21.59	19.25	21.79	21.27	20.92	21.81	21.87	21.35	18.49	20.95	18	19.95	20.49	20.74	19.81	20.77	21.57	20.55	20.95	17.31	18.43	20.87	21.59	18.68	21.53	20.35	23.4
RL7A_HUMAN	P62424	60S ribosomal protein L7a	2	0.421133	0.0105329	0.0654457	17.36	17.97	20.2	18.78	18.8	19.65	20.27	16.99	22.25	18.07	22.08	21.31	22.03	21.05	21.79	21.87	22.27	22.54	14.69	20.39	17.45	21.24	20.79	21.6	22.6	21.43	22.5	20.87	21.99	16.84	19.55	20.41	22.27	20.8	21.1	21.77	23.4
RL7_HUMAN	P18124	60S ribosomal protein L7	3	0.158188	0.356816	0.507107	18.91	13.01	15.21	14.69	18.98	19.06	19.82	15.26	22.05	18.09	21.67	16.42	21.39	21.75	21.46	22.06	19.11	22.79	17.14	20.01	15.78	21.17	20.24	19.76	22.43	21.53	22.21	21.16	21.47	12.5	18.62	16.15	21.46	16.87	20.07	14.53	23.57
RLA0L_HUMAN	Q8NHW5	60S acidic ribosomal protein P0-like	5	0.432366	0.00845057	0.0574176	21.59	20.64	19.58	19.66	20.91	20.17	21.1	19.72	22.1	19.86	21.24	21.58	20.89	20.61	21.68	22.08	21.93	21.95	20.25	20.14	20.3	20.49	20.89	20.63	21.11	21.27	22.46	21.06	20.78	20.11	21.13	21.03	21.66	20.6	21.45	21.5	26.11
RLA0_HUMAN	P05388	60S acidic ribosomal protein P0	5	0.432366	0.00845057	0.0574176	21.59	20.64	19.58	19.66	20.91	20.17	21.1	19.72	22.1	19.86	21.24	21.58	20.89	20.61	21.68	22.08	21.93	21.95	20.25	20.14	20.3	20.49	20.89	20.63	21.11	21.27	22.46	21.06	20.78	20.11	21.13	21.03	21.66	20.6	21.45	21.5	23.24
RLA2_HUMAN	P05387	60S acidic ribosomal protein P2	4	-0.05002	0.772038	0.854757	22.69	21.29	21.3	22.22	22.35	22.19	22.28	22.53	22.23	21.61	22.62	22.3	23.04	23.24	23.46	22.26	22.7	22.06	21.58	22.31	21.91	22.57	22.13	23.09	22.95	23.21	22.99	22.45	22.72	22.24	22.01	22.26	21.59	22.19	21.55	22.62	21.79
ROA1_HUMAN	P09651	Heterogeneous nuclear ribonucleoprotein A1	2	0.168582	0.325681	0.471125	20.51	18.17	20.38	21.39	20.44	20.46	20.54	18.63	21.56	20.22	19.94	19.21	21.48	17.72	19.19	21.91	21.13	20.25	16.08	15.73	16.74	19.55	19.89	20.75	20.87	20.93	21.06	20.38	20.27	17.18	17.42	19.3	21.1	15.09	19.75	18.71	17.87
ROA2_HUMAN	P22626	Heterogeneous nuclear ribonucleoproteins A2/B1	2	0.386398	0.019923	0.0851326	18.3	17.55	18.39	12.96	15.03	12.8	13.65	16.05	18.06	15.46	19.94	15.48	16.3	20.2	19.83	17.86	16.61	20.97	15.49	14.07	18.57	15.38	15.51	13.95	16.66	17.51	17.3	11.39	18.41	16.2	13.48	17.63	18.08	15.29	20.3	13.57	24.13
RPTN_HUMAN	Q6XPR3	Repetin	10	0.290703	0.0854275	0.1926	17.23	17.83	16.04	9.43	14.72	15.57	15.26	10.89	12.39	14.39	15.58	18.4	18.85	13.91	16.45	14.78	15.49	20.33	11.07	14.85	15.86	15.24	16.06	13.31	18.1	19.56	19.3	15.38	19.24	14.18	14.04	13.91	20.44	14.64	18.91	18.49	21.67
RS15A_HUMAN	P62244	40S ribosomal protein S15a	2	0.485479	0.00268775	0.0302983	21.81	21.93	21.69	18.5	20.72	20.85	21.08	20.35	19.32	20.8	21.5	21.39	22.36	18.34	19.11	21.16	22.15	21.51	17	16.85	17.86	20.9	20.85	17.53	18.41	21.14	21.85	17.81	20.93	18.08	21.33	19.11	22.06	19.51	22.52	21.97	23.04
RS18_HUMAN	P62269	40S ribosomal protein S18	2	0.491972	0.0023069	0.0286056	22.41	22.36	22.05	16.46	20.92	19.82	19.28	17.9	22.45	21.09	22.58	22.16	22.74	19.2	22.17	20.48	20.56	23.27	22.35	21.05	20.15	21.92	20.95	21.63	22.6	22.02	23.43	21.4	22.47	19.13	21.57	22.62	22.4	22.12	23.34	22.36	24.41
RS19_HUMAN	P39019	40S ribosomal protein S19	2	0.31404	0.0621478	0.160659	14.39	22.44	16.65	12.35	19.34	8.85	19.52	14.65	13.89	14.27	18.99	17.61	17.37	16.05	21.66	15.19	21.2	15.63	13.4	16.31	13.48	18.29	19.18	17.62	16.58	13.87	20.63	19.68	17.55	19.12	15.43	19.54	12.15	19.41	19.06	20.58	22.19
RS2_HUMAN	P15880	40S ribosomal protein S2	2	0.34885	0.0370471	0.110032	21.16	20.76	18.6	19.02	20.57	19.44	20.93	19.39	21.95	20.57	19.72	21.23	21.73	20	21.19	21.87	22.11	22.45	17.68	20.6	20.41	21.22	20.69	21.98	22.34	21.61	22.53	17.56	21.54	19.19	19.52	21.69	21.14	21.36	22.06	21.19	17.06
RS3_HUMAN	P23396	40S ribosomal protein S3	4	0.0952535	0.58053	0.7023	18.13	20.03	20.61	17.94	20.62	20.21	20.73	19.36	19.96	14.68	19.52	20.6	19.74	18.95	19.68	21.4	21.57	21.86	18.91	19.13	17.88	20.3	20.21	20.65	21.16	21.26	20.25	17.61	20.47	18.28	20.57	17.9	21.34	18.08	21.26	17.87	19.75
RSSA_HUMAN	Q86VC0	40S ribosomal protein SA	3	0.274868	0.104712	0.220073	21.76	21.09	19.07	19.04	19.38	19.16	21.03	19.79	22.4	19.41	20.99	19	19.42	21.43	19.67	19.91	21.34	21.29	19.45	20.77	17.99	18.2	20.17	20.39	21.13	20.97	22.77	18.3	21.55	17.21	21.2	22.18	20.58	21.34	19.29	21.98	18.89
S100P_HUMAN	P25815	Protein S100-P	2	0.38045	0.0220808	0.0912674	23.14	21.42	22.77	21	20.24	16.03	16.67	19.71	21.44	22.82	14.74	22.1	21.54	16.21	20.43	26.49	9.07	15.18	13.84	14.8	12.74	14.11	14.35	15.56	14.07	17.33	14.74	15.53	13.72	16.83	20.15	20.71	20.69	21.67	21.3	22.08	21.79
S10A2_HUMAN	P29034	Protein S100-A2	3	0.382294	0.021392	0.0899189	22.44	22.44	23.18	21.4	22.25	22.04	21.61	20.6	20.78	21.79	21.81	22.93	23.16	21.93	22.4	22.99	22.67	21.43	21.12	19.04	18.02	19.15	21.65	19.8	20.11	21.91	22.73	22.69	19.51	19.91	21.53	19.73	22.73	20.05	22.6	22.73	22.44
S10A6_HUMAN	P06703	Protein S100-A6	2	0.0760704	0.659246	0.766448	21.87	20.27	19.25	19.03	18.97	14.48	16.72	18.37	19.14	20.73	18.56	12.94	17.49	12.94	15.38	17.69	9.99	17.75	11.23	13.49	16.13	16.56	16.18	11.53	11.89	16.22	15.92	17.08	12.03	19.84	15.94	15	11.88	11.82	21.85	20.1	22.35
S10A7_HUMAN	P31151	Protein S100-A7	9	0.00208135	0.990388	0.991907	24.84	21.37	20.71	23.83	24.31	22.75	24.56	23.56	20.44	23.91	22.91	22.7	23.38	20.83	24.88	22.99	23.71	22.93	19.44	21	21.05	21.57	23.18	23.52	24.31	24.78	21.23	21.09	21.44	18.43	18.72	20.89	22.81	20.18	23.05	24.19	22.16
S10A8_HUMAN	P05109	Protein S100-A8	8	0.114788	0.505008	0.650686	23.36	23.71	23.92	21.45	23.24	22.23	24.21	22.75	22.24	24.77	22.42	22.2	22.7	19.52	23.58	19.76	23.59	23.02	19.13	22.37	22.54	22.32	22.93	22.53	23.36	21	24.28	22.11	23.18	22.9	23.21	21.67	23.67	21.16	24.09	21.67	25.92
S10A9_HUMAN	P06702	Protein S100-A9	13	0.121531	0.480142	0.630027	23.5	23.66	22.98	22.3	24.01	23.22	25.39	23.92	21.67	24.93	22.5	23.53	24.36	23.57	23.54	21.51	24.68	24.7	22.16	23.67	22.7	24.59	23.24	23.39	24.83	23.22	25.57	23.1	23.7	23.62	23.76	23.1	24.4	24.34	26.98	24.9	23.22
S10AA_HUMAN	P60903	Protein S100-A10	3	0.30365	0.0718007	0.173349	23.03	23.17	22.93	23.07	23.45	23.36	22.98	22.48	23.6	22.83	23.55	23.41	23.68	22.95	23.35	23.35	23.75	24.11	23.36	20.9	21.02	22.85	23.73	22.94	22.14	23.24	23.36	23.67	23.16	22.03	22.21	22.27	23.12	21.22	23.39	23.34	22.12
S10AB_HUMAN	P31949	Protein S100-A11	4	0.0979209	0.569927	0.696266	21.52	23.85	24.21	23.85	23.79	23.49	23.62	23.69	23.21	21.88	21.39	23.69	23.92	22.19	23.9	22.91	23.56	24.06	21.45	20.65	20.82	23.18	23.3	22.67	22.3	23.1	23.87	23.66	23.2	20.75	23.13	19.77	21.93	21.61	22.4	23.57	20.1
S10AC_HUMAN	P80511	Protein S100-A12	3	0.114106	0.507559	0.6522	20.9	20.21	19.79	17.64	11.52	19.54	21.77	16.03	19.56	21.03	18.47	16.2	16.9	18.52	20.29	13.84	13.49	16.37	12.58	13.44	16.26	18.82	13.92	8.96	14.95	13.28	12.04	16.95	12.12	17.72	18.05	13.52	17.83	16.23	16.04	17.44	24.67
S10AE_HUMAN	Q9HCY8	Protein S100-A14	3	-0.0726048	0.673893	0.77914	22.51	23.05	22.6	22.9	22.97	22.88	23.44	23	23.24	22.2	23.32	23.17	23.19	24.57	22.87	23.23	22.97	23.34	23.04	23.49	22.84	23.03	23.76	23.78	23.52	23.99	23.48	23.61	23.24	22.6	23.61	23.34	22.38	23.17	23.24	22.84	26.55
S10AG_HUMAN	Q96FQ6	Protein S100-A16	9	0.0807534	0.639651	0.751817	21.6	22.58	21.81	21.12	21.9	21.71	22.26	20.6	22.71	21.69	22.57	21.87	22.57	21.73	21.33	21.55	22.28	22.16	22.33	21.66	21.79	21.74	21.74	22.55	22.77	22.34	22.97	22.37	22.18	21.58	20.84	21.75	21.59	20.26	22.61	22.16	22.84
S1A7A_HUMAN	Q86SG5	Protein S100-A7A	2	0.201605	0.238362	0.372957	25.1	21.84	17.51	23.96	24.61	23.53	24.64	23.63	21.68	24	22.44	22.43	24.55	19.67	24.79	23.03	23.83	23.57	15.55	18.37	15.8	21.71	23.83	24	25.11	24.88	24.35	18	19.91	17.9	17.16	19.17	23.11	22.66	23.21	24.62	18.89
SAA_HUMAN	Q6FG67	Serum amyloid A protein	2	-0.0417882	0.808791	0.88665	19.57	18.42	20.44	20.21	18.93	20.05	17.61	19.99	17.98	18.91	17.48	21.07	17.92	23.73	19.39	20.5	20.17	20.11	22.48	19.26	21.8	19.72	19.77	18.6	12.9	14.07	20	19.18	14.4	18.63	18.47	20.3	11.31	20.71	18.61	19.64	22.65
SBSN_HUMAN	Q6UWP8	Suprabasin	9	0.351144	0.0357377	0.109249	21.57	22.31	21.02	21.2	22.8	22.19	21.11	20.69	20.28	21.05	20.08	21.32	21.45	19.63	22.87	22.37	21.83	22.25	18.48	18.78	19.24	20.35	20.47	20.4	18.65	19.02	21.64	18.9	19.54	19.19	20.46	21.13	22.54	21.77	21.21	22.53	25.14
SCEL_HUMAN	O95171	Sciellin	13	0.31957	0.0574449	0.153186	20.57	19.69	20.58	18.38	20.49	19	21.26	19.79	21.59	17.57	20.51	20.82	21.13	21.78	19.74	20.35	21.42	20.94	20.75	19.2	18.12	20.63	20.75	20.99	21.42	20.51	21.25	21.88	21.44	17.37	20.82	21.75	20.53	19.53	21.34	20.95	18.61
SMR3B_HUMAN	P02814	Submaxillary gland androgen-regulated protein 3B	19	0.192472	0.260744	0.396715	20.71	22.53	24.61	26.31	25.23	24.53	26.5	26.85	24.86	21.16	25.25	26.37	24.75	22.26	25.03	25.26	25.75	25.7	21.62	21.77	23.57	22.31	25.07	23.08	23.32	20.47	22.1	26.06	19.55	25.48	24.94	23.06	25.75	26.29	24.75	25.74	21.91
SNAA_HUMAN	P54920	Alpha-soluble NSF attachment protein	2	0.163709	0.34006	0.490319	15.33	18.33	17.16	16.05	10.33	16.66	16.17	16.48	20.75	14.44	20.41	9.26	21.02	13.1	20.34	20.35	20.35	21.21	12.09	16.02	13.63	16.15	19.32	19.89	19.55	20.13	20.86	17.6	17.57	16.17	17.4	18.76	20.72	15.56	18.6	15.93	22.54
SPB13_HUMAN	Q9UIV8	Serpin B13	5	-0.0598815	0.728651	0.8229	21.57	19.72	20.28	21.04	22.35	20.61	22.27	22.03	21.27	20.84	22.01	21.44	21.07	21.7	22.51	21.23	21.99	22.1	19.58	19.72	21.45	21.99	20.63	21.83	22.16	22.33	21.88	19.72	22.6	21.66	20.84	21.13	21.5	18.57	21.07	21.73	20.87
SPB3_HUMAN	Q8IXI3	Serpin B3	15	-0.0227021	0.895441	0.926487	22.91	21.87	21.66	20.65	21.76	21.65	22.29	21.23	21.82	20.95	21.65	21.6	21.89	20.56	23.58	22.22	22.34	22.59	20.32	21.3	21.79	21.93	21.99	23.34	22.09	22.79	22.8	21.76	22.73	21.75	20.56	22.28	22.14	20.46	21.22	22.01	20.87
SPB4_HUMAN	P48594	Serpin B4	10	0.15142	0.378017	0.53266	22.68	21.22	20.88	20.01	21.53	21.3	22.03	20.45	21.77	21.18	21.86	21.4	22.23	19.55	23.57	22.3	22.18	22.53	20.05	20.57	21.27	21.26	21.63	23.24	21.23	22.46	22.29	21.31	22.48	21.81	19.92	21.87	21.86	20.7	21.01	21.71	20.87
SPB5_HUMAN	P36952	Serpin B5	8	0.392705	0.0178299	0.0829451	22.29	22.04	21.73	21.54	22.13	20.64	21.24	21.83	23.04	21.82	22.81	22.86	22.87	19.74	22.63	21.02	22.94	22.56	20.92	20.74	21.67	22.35	22.07	22.67	22.99	22.8	22.98	21.82	22.91	21.79	21.31	22.61	23.33	21.79	21.52	22.95	20.55
SPLC2_HUMAN	Q96DR5	Short palate, lung and nasal epithelium carcinoma-associated protein 2	15	0.150801	0.379994	0.53393	24.17	24.1	23.48	24.05	25.5	25.65	25.04	25.14	25.09	24.15	25.75	25.36	24.45	24.67	24.04	24.34	23.74	23.72	25.62	23.63	24.77	23.1	23.17	23.32	22.13	22.59	23.03	25.09	24.11	25.07	24.22	23.94	24.93	25.46	23.37	24.99	21.73
SPRR3_HUMAN	Q9UBC9	Small proline-rich protein 3	11	0.00698978	0.967727	0.975595	26.42	25.77	26.11	25.02	25.25	24.28	25.2	24.84	26.36	25.4	25.54	26.5	26.4	22.77	24.38	25.08	25.71	25.7	25.64	25.44	25.48	25.79	25.94	24.86	24.63	25.78	25.46	25.9	25.2	25.86	25.8	25.64	25.4	23.56	21.8	26.4	18.7
STAT_HUMAN	P02808	Statherin	9	-0.0887954	0.60656	0.7267	22.37	20.55	19.24	24.07	23.45	22.36	24.56	24.5	24.13	16.77	25.29	23.04	22.47	22.21	18.92	21.23	21.59	20.64	20.72	22.73	22.88	23.43	22.54	22.69	19.47	21.02	20.1	23.37	16.09	24.49	24.21	25.69	22.84	22.49	22.21	24.41	22.58
STOM_HUMAN	P27105	Erythrocyte band 7 integral membrane protein	2	0.306535	0.0690099	0.170293	21.03	18	15.92	13.36	19.88	9.69	12.54	13.24	8.07	21	8.68	14.03	18.5	13.17	20.2	17.44	10.12	11.81	14.08	4.82	9.75	9.18	10.96	5.74	22.97	3.84	11.16	9.56	15.85	18.19	7.79	14.94	13.82	20.1	20.81	18.1	23.55
TAGL2_HUMAN	P37802	Transgelin-2	7	0.396199	0.0167515	0.0812406	21.9	21.01	20.95	20.71	21.35	20.09	19.93	20.92	21.82	21.26	21.13	21.31	22.08	20.66	22.66	21.36	22.15	22.46	19.92	19.82	21.57	21.76	21.72	21.79	21.19	22.18	22.42	19.91	21.93	19.57	21.12	21.92	21.7	21.48	21.61	21.9	26.32
TALDO_HUMAN	P37837	Transaldolase	8	0.368511	0.0270002	0.103815	21.04	21.89	22.17	17.43	18.89	20.32	18.34	19.49	22.23	21.57	20.8	21.43	20.08	16.5	19.8	20.15	17.75	16.05	19.2	17.9	18.83	19.54	17.5	20.33	20.63	19	17.81	16.93	19.75	19.27	17	16.52	20.8	19.93	21.51	18.65	22.76
TBA1A_HUMAN	Q71U36	Tubulin alpha-1A chain	14	0.389196	0.0189704	0.0847687	23.2	22.97	22.96	21.68	22.76	22.54	22.94	22.53	22.84	22.44	22.89	22.98	23.35	21.93	21.93	23.42	23.48	22.91	21.99	22.37	22.48	22.81	22.63	22.92	23.15	23.29	23.2	22.58	22.53	20.81	22.88	21.95	23.28	22.75	23.08	23.27	26.17
TBA1B_HUMAN	P68363	Tubulin alpha-1B chain	15	0.390282	0.0186111	0.0839193	23.14	22.61	22.2	21.72	22.29	22.58	22.35	22.54	22.87	22.46	22.94	22.39	23.39	21.97	22.06	23.47	23.49	23	21.98	22.38	22.4	22.73	22.63	22.88	23.1	23.24	23.15	22.52	22.6	20.95	22.7	21.86	23.29	22.75	22.98	22.34	25.43
TBA1C_HUMAN	Q9BQE3	Tubulin alpha-1C chain	15	0.39146	0.0182279	0.0829451	23.01	22.5	22.13	21.69	22.22	22.47	22.29	22.47	22.74	22.38	22.82	22.31	23.22	21.93	22	23.31	23.3	22.88	21.94	22.3	22.31	22.61	22.53	22.74	22.97	23.1	23.02	22.43	22.5	21	22.58	21.79	23.13	22.64	22.93	22.26	22.62
TBA3C_HUMAN	Q13748	Tubulin alpha-3C/D chain	12	0.425754	0.00962894	0.0636794	23.14	23	23.05	21.53	22.67	22.54	22.87	22.47	22.87	22.44	22.74	23.01	23.36	21.88	22.22	23.42	23.48	23.41	21.93	22.22	22.44	22.86	22.59	23	23.11	23.29	23.12	22.57	23.01	21.41	22.84	21.7	23.4	22.68	23.29	23.3	24.81
TBA3E_HUMAN	Q6PEY2	Tubulin alpha-3E chain	9	0.555685	0.000434237	0.00923913	23.71	23.17	23.13	22.49	23.19	23.15	23.21	22.97	23.28	22.99	23.57	23.55	23.99	22.55	23.5	23.82	23.86	23.76	22.3	22.99	22.45	23.08	23.35	23.43	23.14	23.7	23.89	23.02	23.27	22.03	23.44	23.23	23.84	23.62	23.56	23.65	20.49
TBA4A_HUMAN	P68366	Tubulin alpha-4A chain	13	0.294269	0.0814897	0.185408	22.75	22.3	21.54	21.26	21.9	22.33	22.15	22.19	22.84	22.04	22.72	22.02	23.16	22.18	22.1	23.28	23.28	23.25	21.99	22.27	22.42	22.67	22.43	22.8	23.33	23.1	22.96	22.3	22.97	21.66	22.51	21.61	23.15	22.46	22.72	21.88	20.37
TBA4B_HUMAN	Q9H853	Putative tubulin-like protein alpha-4B	2	0.0858806	0.61847	0.735619	23.43	21.6	19.7	22.93	20.78	23.56	20.41	23.43	23.57	23.41	24.14	20.42	24.3	23.04	23.74	24.22	24.11	24.07	22.77	23.21	23.27	23.21	23.41	23.35	23.7	23.47	23.61	22.99	23.63	23.27	22.61	22.28	23.85	23.57	23.54	18.89	23.1
TBA8_HUMAN	Q9NY65	Tubulin alpha-8 chain	9	0.248783	0.14343	0.259843	22.95	22.46	21.74	21.21	21.99	23.06	22.04	22.97	23.01	22.65	22.68	21.91	23.34	21.94	22.02	23.8	23.78	23.63	22.17	22.31	22.95	22.97	22.66	23.11	23.47	23.3	22.96	22.43	23.18	22.04	22.08	21.54	23.57	23.19	23.32	21.42	25.28
TBB1_HUMAN	Q9H4B7	Tubulin beta-1 chain	4	0.542562	0.000629467	0.0124886	21.17	22.57	22.41	19.95	21.95	21.03	21.49	19.64	23.27	23.66	23.15	22.76	23.33	18.1	20.06	23.16	23.45	21.77	19.94	20.21	19.69	21.88	21.41	22.36	23.14	21.36	23.19	21.9	22.88	20.19	20.73	24.29	23.02	20.67	22.33	22.61	26.11
TBB2A_HUMAN	Q13885	Tubulin beta-2A chain	18	0.612777	7.11e-05	0.00704821	22.31	22.6	22.42	20.62	22.38	21.85	22.07	21.25	22.89	22.65	23.22	22.66	23.34	20.86	21.99	23.21	23.2	22.73	20.59	21.05	21.29	22.16	22.12	22.72	23.12	22.47	22.57	22.04	22.88	20.51	21.17	22.61	23.12	21.84	22.79	22.6	23.59
TBB3_HUMAN	Q13509	Tubulin beta-3 chain	12	0.586459	0.000170689	0.00911802	22.35	22.75	22.71	20.68	22.47	22.12	22.46	21.51	22.5	22.88	23.3	22.85	23.43	21.06	21.57	23.34	23.36	22.65	20.8	21.08	21.61	22.47	22.2	22.77	23.22	22.4	23.14	22.24	22.94	21.37	21.51	23.38	23.14	22.14	22.92	22.78	23.59
TBB5_HUMAN	P07437	Tubulin beta chain	16	0.570806	0.000277633	0.00911802	22.52	22.55	22.5	20.56	22.38	21.94	22.44	21.37	22.63	22.68	23.22	22.24	23.45	21.45	22.03	23.33	23.26	22.74	21.03	21.25	21.57	22.44	22.2	22.71	23.27	22.55	23.15	21.56	22.88	21.37	22.01	23.13	23.15	22.35	22.83	22.63	24.64
TBB8B_HUMAN	A6NNZ2	Tubulin beta-8 chain B	5	0.563136	0.000349279	0.00911802	21.75	22.93	22.82	20.64	22.35	21.65	21.92	20.41	23.38	23.69	23.38	22.97	23.53	19.36	20.77	23.44	23.63	22.17	20.55	20.75	20.54	22.3	21.88	22.67	23.45	21.75	23.33	22.2	23.07	20.9	21.09	24.3	23.27	21.51	22.82	22.95	17.15
TBB8_HUMAN	Q3ZCM7	Tubulin beta-8 chain	6	0.577308	0.00022752	0.00911802	22	22.93	22.86	20.92	22.48	21.81	22.13	20.79	23.28	23.4	23.3	22.91	23.47	20.01	21.13	23.36	23.52	22.27	20.82	20.6	20.86	22.29	21.95	22.64	23.36	21.92	23.24	22.25	22.98	21.41	21.34	24.07	23.14	21.78	22.66	22.89	19.64
TCO1_HUMAN	P20061	Transcobalamin-1	6	0.078741	0.648043	0.758088	22.91	21.5	20.95	22.91	22.23	22.94	21.05	22.43	22.84	22.25	21.53	21.79	21.53	22.75	22.68	22.51	21.63	22.09	21.56	18.99	22.29	21.16	21.04	20.9	20.73	21.7	21.02	21.63	19.48	21.35	20.55	20.15	23.44	22.55	20.5	23.22	24.04
TCPB_HUMAN	P78371	T-complex protein 1 subunit beta	3	0.28715	0.0894946	0.199712	20.47	19.3	16.62	19.69	16.88	16.03	17.94	15.12	16.96	19.37	19.88	18.06	16.86	16.6	19.77	17.28	18.08	18.42	15.24	14.26	15.12	17.68	14.55	18.95	19.33	16.75	18.43	16.43	14.94	13.21	12.94	15.62	15.91	15.85	16.25	16.01	24.79
TCPQ_HUMAN	P50990	T-complex protein 1 subunit theta	2	0.123502	0.472995	0.625615	19.35	19.6	14.24	15.04	19.52	17.72	20.46	16.43	19.09	17.59	20.94	16.88	20.86	17.98	19.49	20.64	21.37	21.28	14.88	19.18	16.65	17.48	19.52	20.43	20.7	19.62	21.21	19.19	20.73	24.19	19.61	17.56	17.21	15.63	20.85	17.9	21.81
TCTP_HUMAN	P13693	Translationally-controlled tumor protein	2	0.234324	0.168956	0.293015	20.8	21.01	20.69	20.49	21.44	20.8	21.29	21.34	21.34	20.22	21.39	21.13	21.37	19.42	21.93	21.57	21.69	21.53	19.79	19.72	20.74	21.14	21.08	21.52	21.53	21.46	21.57	20.96	21.38	19.76	20.51	21.94	21.19	20.12	20.86	21.2	25.11
TERA_HUMAN	P55072	Transitional endoplasmic reticulum ATPase	8	0.529757	0.000891403	0.0142624	20.86	20.28	20.57	18.18	17.48	17.84	19.43	18.4	20.92	20.41	20.14	19.34	21.33	19.06	21.45	21.4	21.33	21.76	17.3	17.9	17.21	20.03	19.38	20.32	20.2	21.26	21.01	18.58	21	18.07	19.17	19.57	20.25	18.73	21.11	19.29	23.62
TGM1_HUMAN	P22735	Protein-glutamine gamma-glutamyltransferase K	16	0.199835	0.242595	0.378387	21.25	20.71	20.54	19.52	21.26	20.9	21.14	18.76	21.72	19.43	22.36	21.91	22.14	20.23	21.37	22.09	21.66	20.93	19.94	20.49	19.22	21.49	21.68	21.37	22.33	22.46	22.31	20.97	21.82	17.37	20.83	18.53	21.94	17.88	21	21.82	21.76
TGM3_HUMAN	Q08188	Protein-glutamine gamma-glutamyltransferase E	45	0.0391034	0.820869	0.88665	23.79	21.92	22.98	22.59	23.77	23.02	23.53	23.5	23.3	22.6	23.05	23.48	23.85	22.62	24.05	23.02	23.68	23.49	22.99	22.76	22.6	23.52	23.58	23.5	22.83	24.12	23.64	23.04	23.25	22.06	22.88	22.24	24.22	22.32	23.52	24.04	22.72
THIO_HUMAN	P10599	Thioredoxin	9	-0.0759328	0.659825	0.766448	24.66	24.43	24.25	24.61	24.44	24.34	24.2	24.64	24.29	23.73	24.01	24.35	24.5	24.32	25.01	23.63	24.89	24.68	23.95	23.27	24.12	24.56	24.99	24.4	23.99	24.91	24.29	24.28	23.57	23.51	24.21	24.18	24.72	23.18	24.52	24.67	20.77
TIMP1_HUMAN	P01033	Metalloproteinase inhibitor 1	2	0.128629	0.454671	0.606228	22.75	18.5	21.3	20.4	19.8	17.19	17.38	20.38	17.78	21.16	16.94	17.39	19.45	17.53	16.67	19.7	18.65	18.48	19.26	16.73	20.72	18.14	18.02	15.94	17.97	18.3	15.42	24.45	19.24	19.89	15.56	17.28	23.05	21.87	22.81	20.88	18.88
TKT_HUMAN	P29401	Transketolase	13	0.465543	0.00421983	0.03672	22.73	21.97	22.19	20.85	21.5	21.49	21.68	21.59	22.15	22.97	21.61	22.53	22.09	21.12	22.3	21.56	21.59	21.68	20.55	21.09	21.26	21.63	21.04	21.93	22.11	22.28	22.14	20.97	21.74	21.42	21.33	22.09	21.37	21.75	21.85	21.53	23.53
TM11B_HUMAN	Q86T26	Transmembrane protease serine 11B	2	0.387477	0.0195511	0.0850239	15.97	13.76	13.55	14.35	19.06	16.63	20.93	17.88	23.23	17.24	21.31	21.93	19.33	21.25	16.14	18.06	15.77	22.27	12.41	14.9	19.63	17.21	12.51	17.44	17.32	21.1	14.8	10.47	21.2	16.71	20.82	21.71	15.76	21.47	21.67	21.02	22.26
TM11D_HUMAN	O60235	Transmembrane protease serine 11D	2	0.225376	0.186297	0.308011	20.51	17.38	17.72	20.11	19.04	18.15	19.02	17.59	21.04	18.97	20.87	20.93	19.23	21.73	22.36	19.51	20.98	21.63	19.86	20.4	18.76	20.83	20.34	21.59	22.18	21.53	22.35	19.14	21.13	13.99	20.44	20.45	21.12	20.97	20.19	21.09	20.47
TMSL3_HUMAN	A8MW06	Thymosin beta-4-like protein 3	2	0.272443	0.107935	0.222828	22.83	22.74	24.82	16.53	21.16	21.64	13.91	21.55	19.83	23.11	13.93	22.93	21.9	14.94	12.97	11.38	15.64	15.47	12.37	6.04	21.22	7.77	9.24	17.84	9.62	12.24	13.08	13.92	19.85	19.78	10.96	13.07	17.52	14.4	22.53	18.88	26.72
TPIS_HUMAN	P60174	Triosephosphate isomerase	9	-0.0692251	0.688292	0.792095	22.87	21.87	22.99	22.78	22.78	22.19	22.85	22.81	22.56	23	22.29	22.92	22.84	21.98	23.28	22.52	22.8	22.99	22.21	22.66	22.57	23.21	22.29	22.83	23.11	23.35	22.99	22.47	22.95	22.14	22.54	23.07	22.32	22.21	22	22.65	24.73
TPM1_HUMAN	Q96IK2	Tropomyosin alpha-1 chain	2	0.109019	0.526786	0.665735	23.04	23.71	23.93	20.55	21.64	21.6	23.17	24.28	19.92	21.1	21.64	22.36	20.37	20.86	21.73	22.21	22.48	22.51	19.01	21.78	22.3	22.54	18.95	21.96	22.05	23.64	21.38	21.12	22.3	20.26	20.08	19.53	20.12	22.26	23.54	21.5	18.97
TPM2_HUMAN	P07951	Tropomyosin beta chain	3	0.315925	0.0605118	0.158803	22.6	22.67	22.87	19.7	20.91	19.21	21.47	21.9	20.74	20.02	20	21.49	20.39	21.34	20.74	21.68	21.99	19.11	19.44	15.53	20.39	21.56	18.96	17.37	17.76	22.03	21.7	20.66	17.07	18.15	20.47	17.05	20.12	21.81	23.1	19.64	22.63
TPM3_HUMAN	P06753	Tropomyosin alpha-3 chain	4	-0.00988597	0.954367	0.966053	21.72	21.99	22.23	16.79	19.79	19.94	22	20.83	17.83	19.56	20.02	18.49	20.47	17.95	20.94	20.72	14.62	21.56	18.45	22.69	18.35	20.39	18.44	20.78	20.96	22.34	19.36	17	21.16	17.93	18.67	19.27	19.98	20.61	22.16	19.56	23.16
TPM4_HUMAN	Q9UCS3	Tropomyosin alpha-4 chain	5	0.18086	0.291153	0.429797	21.72	21.71	21.94	17.04	19.72	18.83	21.22	20.09	18.74	19.21	19.36	18.74	20.47	18.82	20.51	20.7	15.9	19.71	18.81	18.76	17.99	20.23	18.55	18.26	18.6	21.64	19.96	17.55	18.25	17.13	19.19	17.84	20.01	20.66	22.17	18.83	25.28
TRFE_HUMAN	P02787	Serotransferrin	20	0.328483	0.0504647	0.139835	22.89	21.35	20.58	22.21	21.74	20.97	21.02	21.94	22.5	21.93	21.29	21.87	21.01	20.41	22.32	20.71	20.3	20.55	20.1	20.65	18.93	18.12	18.3	18.85	17.63	19.96	19.14	19.39	21.94	23.39	22.78	22.05	20.27	21.91	23.56	22.39	24.46
TRFL_HUMAN	Q8TCD2	Lactotransferrin	34	0.107152	0.533929	0.66654	24.18	23.29	23.17	24.26	23.2	22.99	23.82	23.68	23.11	23.05	23.72	24.05	24.29	23.88	22.83	23.99	23.44	23.1	23.17	22.48	26.4	25.93	22.08	21.71	22.87	22.15	22.43	21.39	22.82	22.65	22.87	22.55	24.14	24.01	25.34	23.74	17.84
TRI29_HUMAN	Q14134	Tripartite motif-containing protein 29	8	0.574745	0.000246211	0.00911802	20.44	22.71	22.3	19.8	19.64	21.11	21.58	20.28	22	20.32	22.56	22.04	22.19	22.49	22.19	22.65	22.52	22.61	21.19	19.84	20.15	21.97	20.56	20.89	22.27	19.92	22.39	21.43	21.22	19.74	21.22	22.16	22.13	21.33	22.5	22.35	22.01
TTHY_HUMAN	P02766	Transthyretin	3	0.230998	0.175262	0.295901	22.19	22.46	21.36	18.4	17.06	18.45	16.94	21.02	15.64	22.97	16.28	22.4	21.48	18.05	18.96	14.63	14.72	20.77	15.32	21.32	15.68	15.14	15.95	14.58	15.25	19.63	20.21	16.34	16.61	23.07	21.45	17.27	17.81	21.65	22.05	20.98	22.93
TYB4_HUMAN	P62328	Thymosin beta-4	2	0.272443	0.107935	0.222828	22.83	22.74	24.82	16.53	21.16	21.64	13.91	21.55	19.83	23.11	13.93	22.93	21.9	14.94	12.97	11.38	15.64	15.47	12.37	6.04	21.22	7.77	9.24	17.84	9.62	12.24	13.08	13.92	19.85	19.78	10.96	13.07	17.52	14.4	22.53	18.88	22.19
TYPH_HUMAN	P19971	Thymidine phosphorylase	2	0.303452	0.0719957	0.173349	19.75	20.43	17.08	20.95	21.69	20.33	21.75	20.84	20.26	18.23	20.12	19.93	20.66	20.33	22.49	21.49	20.81	21.75	15.73	18.06	17.68	13.92	15.18	16.92	18.24	17.38	15.85	16.44	19.05	21.57	15.3	17.87	21.8	22.01	20.71	21.16	24.23
UBA1_HUMAN	P22314	Ubiquitin-like modifier-activating enzyme 1	3	0.466013	0.00417643	0.03672	18.3	21.87	18.21	17.06	19.63	16.78	20.33	16.77	20.83	17.98	19.89	20.2	20.57	18.43	20.3	20.43	20.88	20.75	18.35	18.41	15.21	19.83	18.25	20.48	20.18	20.26	20.86	16.45	19.53	16.62	17.34	20.04	19.87	18.19	20.03	18.82	21.92
VAT1_HUMAN	Q99536	Synaptic vesicle membrane protein VAT-1 homolog	2	-0.0346951	0.840789	0.891093	21.43	21.61	21.7	18.62	20.12	20.36	20.06	20.76	16.05	21.08	15.23	20.97	18.98	10.23	19.2	15.84	18.81	18.95	15.53	16.29	19.08	20.09	18.69	22.57	21.61	21.32	18.85	16.39	19.94	16.17	17.88	18.01	19.68	17.97	20.83	18.88	24.55
VATA_HUMAN	P38606	V-type proton ATPase catalytic subunit A	2	0.313804	0.0623551	0.160659	18.01	22.18	19.22	13.71	17.78	22.27	16.69	22.32	18.46	19.03	19.92	17.99	18.41	14.43	20.24	19.32	19.26	19.95	17.17	15.1	16.31	13.89	14.02	17.52	19.37	17.84	14.78	13.59	19.35	17.72	15.6	15.51	19.34	17.81	19.03	13.92	26.12
VDAC1_HUMAN	P21796	Voltage-dependent anion-selective channel protein 1	2	0.157396	0.359257	0.509118	21.18	19.7	19.56	20.55	21.35	21.35	21.28	20.66	22.23	20.52	21.33	21.68	22	19.31	21.74	21.78	21.57	21.94	22.39	19.99	19.4	21.31	21.72	22.07	21.38	22.14	22.61	21.62	21.7	19.59	19.66	21.2	21.47	20.1	21.99	21.23	20.28
VDAC2_HUMAN	P45880	Voltage-dependent anion-selective channel protein 2	5	0.131404	0.444914	0.596425	19.18	21.1	20.82	21.13	20.11	21.59	21.73	20.71	21.97	20.35	22.77	22.07	22.4	20.9	21.58	22.34	22.43	21.56	20.64	21.5	20.58	22.24	22.08	22.52	22.36	22.55	22.59	22.51	22.55	20.91	21.27	20.71	21.02	19.88	22.69	22.2	25.95
VIME_HUMAN	Q96ML2	Vimentin	13	0.554676	0.000447055	0.00923913	23.68	22.87	23.37	11.37	17.98	18.97	16.2	18.74	18.4	22.09	16.02	22.11	20.91	18.63	15.58	12.7	16.27	15.92	10.29	10.74	11.14	12.85	12.99	11.27	14.22	14.56	12.51	10.43	13.11	11.61	13.53	15.41	16.9	19.69	21.75	18.46	19.56
VTDB_HUMAN	P02774	Vitamin D-binding protein	2	-0.0479662	0.781166	0.861018	20.85	21.59	22.04	19.49	20.78	20.85	21.67	21.56	19.71	21.97	18.25	21.54	20.99	22.18	21.6	17.51	16.94	21.7	20.92	21.89	20.91	17.07	18.17	19.89	17.55	18.01	16.11	14.05	16.34	22.25	19.42	21.04	19.04	19.91	22.44	20.49	21.98
WDR1_HUMAN	O75083	WD repeat-containing protein 1	6	0.580549	0.000205701	0.00911802	22.1	22.02	22.39	19.17	20.42	20.2	20.59	19.33	21.77	21.63	21.46	21.27	20.86	19.68	21.62	21.67	21.53	21.48	20.11	19.75	19.33	21.11	20.66	21.22	21.83	20.5	22.21	20.87	21.21	19.47	20.48	20.36	21.55	20.87	22.05	21.75	26.4
YI016_HUMAN	A6NKZ8	Putative tubulin beta chain-like protein ENSP00000290377	5	0.563136	0.000349279	0.00911802	21.75	22.93	22.82	20.64	22.35	21.65	21.92	20.41	23.38	23.69	23.38	22.97	23.53	19.36	20.77	23.44	23.63	22.17	20.55	20.75	20.54	22.3	21.88	22.67	23.45	21.75	23.33	22.2	23.07	20.9	21.09	24.3	23.27	21.51	22.82	22.95	22.86
ZA2G_HUMAN	P25311	Zinc-alpha-2-glycoprotein	13	-0.0493249	0.775124	0.856262	25.48	24.98	24.97	25.42	25.14	25.32	24.76	25.24	25.38	24.86	24.71	24.88	24.33	25.62	25.32	25.28	25.52	25.26	24.93	23.71	25.52	25.25	24.89	24.83	24.52	24.66	24.64	25.19	24.33	24.76	24.76	24.26	25.46	24.97	23.98	24.81	24.6
ZG16B_HUMAN	Q96DA0	Zymogen granule protein 16 homolog B	15	-0.106858	0.53506	0.66654	25.12	25.36	24.49	26.45	26.13	26.17	25.86	26.22	25.3	26.07	25.91	25.57	25.67	25.31	24.87	24.98	24.9	23.03	25.48	24.69	25.09	25.39	24.59	24.09	23.99	24.08	22.55	23.19	23.72	23.66	21.7	22.89	25.73	24	21.89	24.93	22.66
ZN185_HUMAN	O15231	Zinc finger protein 185	4	0.502802	0.00177603	0.0231819	19.62	19.48	17.62	18.88	18.21	16.44	18.12	14.82	20.37	16.1	20.94	19.8	21.27	19.36	17.11	21.13	20.16	21.51	18.61	18.56	15.31	18.64	18.02	20.03	19.57	20.39	22.09	19.56	20.1	15.58	19.29	20.65	20.18	19.45	19.47	17.49	24.19

## Sheet: HIVnegative
Protein	UniProt	Description	PeptideCount	Corr	Pvalue	AdjPval	N01_35	N01_36	N01_100	N01_102	N03_0	N03_35	N03_36	N03_100	N03_102	N05_0	N05_35	N05_36	N06_0	N06_35	N06_36	N08_0	N08_35	N08_36	N08_100	N08_102	N11_0	N11_35	N11_36	N11_100	N11_102	N12_0	N12_35	N12_36	N12_100	N13_0	N13_35	N13_100	N13_102	N14_0	N14_35	N14_36	N14_100	N14_102	N15_0	N15_35	N15_100	N15_102	N16_0
1433B_HUMAN	P31946	14-3-3 protein beta/alpha	8	0.21131	0.163495	0.848877	22.26	21.96	21.29	21.16	21.87	20.4	19.94	20	19.98	22.51	21.72	20.84	19.69	20.3	21.42	20.95	21.04	20.84	21.09	21.1	21.88	21.76	21.69	21.38	21.47	21.61	20.66	20.86	21.66	21.71	22.5	21.32	21.48	22.18	21.52	21.42	21.35	20.82	22.5	21.86	21.98	21.42	21.06
1433E_HUMAN	P62258	14-3-3 protein epsilon	5	0.171863	0.258952	0.851194	22.34	21.93	19.56	19.78	21.99	20.81	21.09	21.17	20.31	22.4	22.03	21.48	19.95	20.45	20.7	20.14	20.86	21.13	20.38	20.25	21.82	21.96	21.27	21.65	22.08	21.79	20.98	20.32	21.54	22.24	20.99	21.56	21.7	22.29	20.59	19.84	24.01	22.62	21.83	21.4	21.79	21.17	21.27
1433F_HUMAN	Q04917	14-3-3 protein eta	2	0.0268001	0.861274	0.984439	23.98	23.53	22.27	22.56	23.43	23.19	23.47	22.57	22.74	23.65	23.39	22.84	22.97	23.94	23.16	21.74	22.49	22.34	22.26	22.45	23.2	23.39	23.09	22.99	23.22	23.14	22.93	23.52	23.21	23.25	24.44	22.8	23.21	23.88	23.17	23.25	23	22.77	24.54	23.13	22.94	22.85	24.15
1433G_HUMAN	P61981	14-3-3 protein gamma	4	0.0598091	0.696336	0.948464	22.46	15.95	18.74	17.37	21.74	19.23	19.53	18.12	19.55	22.36	21.89	19.65	20.5	19.92	21.52	19.11	18.34	20.82	20.31	16.8	21.62	21.39	21.41	21.49	21.62	15.39	16.61	15.51	19.24	21.63	22.22	21.28	21.92	19.38	20.17	21.23	21.74	21.22	22.65	21.6	22.23	18.14	18.73
1433S_HUMAN	P31947	14-3-3 protein sigma	17	0.206397	0.173738	0.848877	23.37	23	21.35	21.07	22.85	22.46	22.32	21.61	21.93	23.15	22.51	21.72	23.03	22.18	22.56	21.09	20.95	21.88	21.93	22.11	22.35	22.68	22.79	22.38	22.62	22.22	21.42	22.37	21.88	22.12	21.34	22.3	22.31	22.49	22.37	22.19	21.83	22.02	22.75	21.62	21.48	22.04	22.49
1433T_HUMAN	P27348	14-3-3 protein theta	5	0.122118	0.424212	0.870123	22.72	22.29	21.05	21.37	22.04	19.63	21.14	21.46	21.28	22.46	21.98	21.27	21.5	20.4	21.97	22.5	21.09	21.22	20.73	21.04	22.27	22.01	21.65	21.51	21.68	22.12	20.23	20.67	21.58	22.06	22.41	21.7	22.01	22.73	21.95	21.75	21.79	21.22	22.99	22.18	22.21	21.42	24.31
1433Z_HUMAN	Q6NUR9	14-3-3 protein zeta/delta	14	0.0163855	0.914923	0.989513	23.17	22.96	21.55	21.43	22.89	22.29	22.22	21.61	21.33	23.16	22.4	21.99	22.19	21.85	22.62	21.97	21.91	22.07	22.26	22.27	22.88	22.7	22.68	22.15	22.55	22.55	22.5	23.13	22.46	22.62	23.4	22.01	22.12	23.27	22.58	22.28	22.2	21.83	24.24	22.56	22.52	21.98	23.05
6PGD_HUMAN	P52209	6-phosphogluconate dehydrogenase, decarboxylating	17	0.13576	0.373894	0.866501	20.53	20.02	18.96	19.79	21.04	18.82	18.04	20.05	19.16	20.49	19.5	19.06	18.37	17.17	18.85	19.2	20.04	20.12	20.08	19.9	20.82	19.58	18.46	20.68	20.89	21.03	18.92	19.67	21.07	21.01	19.75	19.54	20.41	20.38	18.37	18.11	20.64	17.73	21.66	20.98	22.09	20.2	19.37
A1AG1_HUMAN	P02763	Alpha-1-acid glycoprotein 1	4	0.183552	0.227454	0.851194	21.14	21.01	22.43	22.43	17.37	21.26	21.17	21.46	19.73	21.74	20.31	19.01	19.7	18.67	22.71	22.61	21.71	20.43	19.64	17.64	22.17	18.78	21.54	20.85	20.99	21.46	17.19	18.91	21.23	23.31	18.09	22.29	21.76	15.16	17.64	17.03	21.12	20.06	21.48	18.99	22.2	21.2	16.99
A1AG2_HUMAN	P19652	Alpha-1-acid glycoprotein 2	2	0.221775	0.143154	0.848877	21.47	20.82	21.21	21.13	18.4	17.7	22.89	19.55	15.52	17.84	18.22	16.11	17.88	17.56	15.72	21.11	20.07	18.22	19.9	16.4	19.64	18.15	19.97	19.16	19.77	18.28	17.69	18.75	19.59	22.92	19.56	21.23	21.13	13.31	12.9	17.11	17.79	15.91	11.37	16.63	20.65	17.74	14.67
A1AT_HUMAN	Q86U18	Alpha-1-antitrypsin	14	0.188634	0.21462	0.851194	21.28	21.29	17.36	21.9	10.99	14.62	18.66	15.58	15.07	14.36	18.87	14.79	14.89	15.83	15.53	17.01	14.58	14.3	20.07	20.37	15.45	16.64	19.02	20.25	21.13	16.25	21.57	15.16	20.64	22.86	18.83	22.1	22.19	12.23	19.13	16.61	18.9	18.02	17.65	15.64	18.67	17.8	16.58
A2MG_HUMAN	P01023	Alpha-2-macroglobulin	26	0.0468672	0.759821	0.953071	18.79	19.83	20.4	18.61	11.75	13.9	12.5	10.55	10.13	11.87	14.86	12.06	10.29	12.2	10.87	18.04	20.28	21.27	21.67	19.55	15.01	13.15	11.19	18.21	19.12	15.88	21.99	19.51	19.85	21.32	17.79	17.97	17.52	10.94	13.58	10.96	15.45	12.37	17.2	15.62	17.87	13.95	12.02
A2ML1_HUMAN	A8K2U0	Alpha-2-macroglobulin-like protein 1	29	0.122101	0.424275	0.870123	21.02	20.1	19.97	19.08	22.04	19.74	19.29	21.25	20.91	22.45	21.7	22.11	19.7	18.41	21.34	22.37	20.91	21.46	21.16	21.72	21.1	21.13	21.12	21.27	21.76	21.23	20.71	21.21	22.04	21.43	20.03	21.42	21.75	21.21	20.87	21.07	21.57	21.94	21.81	21.17	21.72	21.68	21.24
AACT_HUMAN	Q6NSC9	Alpha-1-antichymotrypsin	2	0.00423278	0.977985	0.991089	14.85	17.33	16.44	20.59	15.28	15.53	18.32	16.21	13.17	17.72	16.61	15.8	19.78	15.77	13.98	15.74	14.39	16.47	18.23	16.61	17.28	17.78	18.17	15.27	9.61	12.26	19.97	13.63	12.01	22.03	14.15	15	20.49	15.43	15.1	16	19.15	14.58	14.69	17.49	14.42	10.85	14.41
ACTA_HUMAN	P62736	Actin, aortic smooth muscle	28	-0.0463163	0.762562	0.953071	23.85	23.8	24.43	24.63	24.2	25.24	23.24	23.99	24.23	24.66	23.78	24.16	23.57	22.95	23.98	24.01	24.46	24	23.97	24.28	23.68	23.28	22.93	23.99	24.15	24.44	23.22	22.94	25.29	24.1	23.16	23.61	23.87	23.64	23.87	23.78	24.43	23.83	25.32	24.11	24.47	24.23	23.85
ACTBL_HUMAN	Q562R1	Beta-actin-like protein 2	15	0.0469895	0.759213	0.953071	21.25	22.49	23.54	23.95	23.09	23.79	22.81	22.88	22.92	23.6	22.93	23.34	21.13	20.98	23.1	23.31	23.62	23.02	23.39	23.62	22.81	22.41	21.68	21.95	22.68	23.51	22.21	22.97	24.3	23.77	21.34	22.2	23.03	22.93	22.05	22.4	23.26	23.29	23.06	23.19	22.69	22.68	22.98
ACTBM_HUMAN	Q9BYX7	Beta-actin-like protein 3	15	-0.010782	0.943959	0.990093	23.82	23.89	24.41	24.74	23.68	25.17	23.23	24.12	24.02	24.62	23.84	24.27	23.67	23.32	24.57	24.57	24.66	23.9	24.43	23.97	24.14	24.03	23.16	23.89	24.4	24.23	23.02	21.9	25.31	24.23	23.25	23.72	24.04	24.03	23.5	23.59	24.42	23.57	25.16	24.08	24.47	24.74	23.78
ACTB_HUMAN	Q96HG5	Actin, cytoplasmic 1	48	-0.0152896	0.920594	0.989513	23.18	23.2	24.11	24.22	23.47	24.61	22.69	23.26	23.51	24.27	23.14	23.75	22.16	22.14	23.05	23.99	24.22	23.6	23.96	23.81	22.83	22.68	22.38	23.21	23.64	24	23.18	22.5	24.94	23.97	22.86	22.82	23.56	23.15	23.06	22.63	23.44	22.76	24.44	23.64	23.85	23.43	23.3
ACTC_HUMAN	P68032	Actin, alpha cardiac muscle 1	32	-0.0144845	0.924763	0.989513	23.69	23.76	24.46	24.66	24.06	25.05	23.3	24.06	24.26	24.65	23.83	24.18	23.54	23.06	24.05	23.87	24.44	23.98	23.7	24.24	23.79	23.41	23.05	24	24.18	24.43	23.08	23.2	25.27	24.11	23.28	23.68	23.95	23.76	23.85	23.77	24.45	23.77	25.29	24.13	24.53	24.32	23.59
ACTG_HUMAN	P63261	Actin, cytoplasmic 2	48	-0.0152896	0.920594	0.989513	23.18	23.2	24.11	24.22	23.47	24.61	22.69	23.26	23.51	24.27	23.14	23.75	22.16	22.14	23.05	23.99	24.22	23.6	23.96	23.81	22.83	22.68	22.38	23.21	23.64	24	23.18	22.5	24.94	23.97	22.86	22.82	23.56	23.15	23.06	22.63	23.44	22.76	24.44	23.64	23.85	23.43	23.3
ACTH_HUMAN	P63267	Actin, gamma-enteric smooth muscle	28	-0.0463163	0.762562	0.953071	23.85	23.8	24.43	24.63	24.2	25.24	23.24	23.99	24.23	24.66	23.78	24.16	23.57	22.95	23.98	24.01	24.46	24	23.97	24.28	23.68	23.28	22.93	23.99	24.15	24.44	23.22	22.94	25.29	24.1	23.16	23.61	23.87	23.64	23.87	23.78	24.43	23.83	25.32	24.11	24.47	24.23	23.85
ACTN1_HUMAN	P12814	Alpha-actinin-1	10	0.193993	0.201639	0.851194	21.21	20.94	20.11	19.32	21.42	20.37	17.58	19.99	19.63	21.57	20.3	20.59	18.51	18.04	20.79	19.64	20.17	19.28	20.73	20.49	21.3	21.03	20.84	20.75	20.88	21.39	21.25	20.19	21.81	21.62	20.66	19.72	20.59	21.2	18.56	19.14	19.82	18.95	21.46	21.34	21.4	20.98	20.57
ACTN2_HUMAN	P35609	Alpha-actinin-2	4	0.17017	0.263743	0.851194	21.86	20.78	19.48	18.86	21.19	17.88	16.19	20.09	18.3	20.71	20.95	20.52	15.77	15.13	20.35	19.65	20.77	19.41	18.62	20.35	20.8	20.56	20.2	19.64	19.55	21.23	21.15	21.69	21.18	21.47	19.46	20.16	19.98	21.29	18.82	19.1	18.55	15.53	21.56	20.88	20.82	20.87	19.22
ACTN3_HUMAN	Q08043	Alpha-actinin-3	2	0.175935	0.247664	0.851194	20.73	20.42	16.89	16.8	21.03	16.91	16.61	20.15	19.74	21.85	20.91	20.34	15.51	15.54	20.48	16.81	18.64	16.91	19.42	19.06	20.89	20.87	19.48	20.32	20.34	21.35	21.04	16.64	20.97	21.44	20.77	19.57	20.31	21.11	17.76	17.63	17.28	17.89	19.23	20.95	20.6	20.26	21
ACTN4_HUMAN	O43707	Alpha-actinin-4	27	0.0776976	0.611936	0.932653	19.37	19.04	17.2	16.54	19.39	16.77	15.41	18.18	18.56	20.8	20.21	18.31	16.19	15.09	18.51	18.11	18.74	18.13	18.57	19.93	19.59	20.37	19.5	17.47	18.05	19.44	19.58	19.83	18.35	19.92	18.11	19.87	19.6	20.37	18.23	17.33	17.64	15.66	17.63	19.95	20.42	19.96	18.52
ACTS_HUMAN	P68133	Actin, alpha skeletal muscle	30	0.10105	0.508944	0.894088	23.74	23.93	24.61	24.64	24.13	25.08	23.72	24.13	24.25	24.8	24.06	24.23	23.93	23.47	24.12	23.77	24.38	24.03	23.73	24.29	24.35	24.18	23.73	24.34	24.44	24.54	23.05	23.14	25.27	24.14	23.29	23.9	24.09	24.34	24.1	24.17	24.56	24.07	25.31	24.27	24.49	24.36	23.7
ADH7_HUMAN	P40394	Alcohol dehydrogenase class 4 mu/sigma chain	2	-0.0937334	0.540247	0.898202	14.6	16	12.11	14.12	19.09	17.16	14.97	18.06	18.93	20.82	20.4	17.5	17.59	14.71	15.66	17.73	17.39	19.05	16.94	17.48	20.4	20.62	8.27	18.53	16.97	19.79	17.77	17.57	16.58	20.98	17.92	18.46	19.73	20.55	18.72	17.44	18.22	19.24	13.77	20.19	20.81	18.14	14.39
ADT1_HUMAN	P12235	ADP/ATP translocase 1	2	-0.116983	0.444094	0.871703	19.84	14.43	10.19	15.35	16.45	17.31	5.67	10.76	12.29	14.8	20.38	18.19	9.51	8.54	14.7	16.25	14.71	12.17	12.03	18.33	11.96	17.49	15.65	12.96	6.39	12.52	17.5	20.09	13.64	21.04	15.54	16.86	19.91	17.72	14.22	13.38	11.68	7.35	11.73	19.59	20.58	16.38	14.21
ADT2_HUMAN	P05141	ADP/ATP translocase 2	4	-0.109117	0.475525	0.877933	20.02	16.1	12.95	15.62	16.24	18.52	9.35	13.52	14.82	17.59	20.3	14.98	11.7	12.1	13.49	16.63	15.48	15.15	15.05	15.72	13.1	18.35	17.54	13.36	10.54	15.79	18.25	17.82	13.58	21.32	17.93	17.46	20.16	17.48	15.65	13.58	12.73	11.93	13.34	16.03	20.57	17.77	14.49
ADT3_HUMAN	P12236	ADP/ATP translocase 3	4	-0.160025	0.293692	0.866501	19.79	16.08	13.96	15.74	18.25	19.71	10.76	13.39	16.01	17.45	20.3	16.27	13.27	12.84	13.5	17.31	16.69	15.98	15.59	16.14	15.53	19.05	17.51	14.79	11.19	15.99	18.7	17.88	15.51	20.92	19.1	18.14	19.93	18.95	16.41	15.9	14.57	12.41	14.68	19.64	20.42	17.88	14.26
AHNK_HUMAN	Q09666	Neuroblast differentiation-associated protein AHNAK	36	-0.0359225	0.814776	0.972591	18.92	19.14	15.38	15.9	20.2	15.33	17.02	18.36	19.14	20.73	21.28	18.67	18.77	15.11	19.13	20.6	18.35	18.76	17.13	19.53	19.19	20.3	18.76	15.9	16.46	19.71	19.05	19.56	15.83	21.03	18.29	18.99	19.99	19.99	18.65	18.81	16.34	16.42	15.19	20.23	17.72	20.07	19.68
AK1BA_HUMAN	O60218	Aldo-keto reductase family 1 member B10	6	0.283949	0.0587175	0.710482	20.64	17.67	13.8	15.09	18.65	14.72	16.38	18.63	17.95	19.28	18.1	17.95	17.62	13.98	17.68	15.57	17.91	19.79	17.29	18.82	18.61	21.04	20.03	17.3	19.36	14.95	17.7	17.98	16.98	15.38	18.89	19.04	20.63	17.46	18.3	16.93	18.3	15.71	13.24	15.64	17.58	18.13	15.29
AL3A1_HUMAN	P30838	Aldehyde dehydrogenase, dimeric NADP-preferring	11	0.290012	0.0533013	0.692119	21.61	21.3	16.99	17.52	21.53	15.26	16.35	18.22	19.86	20.95	21.7	21.29	16.87	15.97	18.68	17.33	19.07	19.91	17.88	18.64	20.42	20.78	18.71	20.86	21.63	19.24	17.99	19.18	16.9	21.92	18.18	19.77	20.99	21.15	18.49	20.24	21.85	20.69	20.15	21.36	21.12	19.63	18.93
AL9A1_HUMAN	P49189	4-trimethylaminobutyraldehyde dehydrogenase	2	0.142107	0.351751	0.866501	19.04	13.49	16.88	11.17	18.27	13.69	13.53	16.88	15.26	20.28	15.92	15.97	13.93	12.81	14.73	10.93	18.12	18.49	17.07	18.53	19.66	20.16	18.8	19.33	19.58	19.05	14.56	16.96	17.78	20.32	16.14	18.96	20.48	18.95	17.01	18.52	15.16	19.73	20.75	20.07	21.34	19.15	15.04
ALBU_HUMAN	Q9P157	Serum albumin	47	0.295596	0.0486756	0.692119	25.55	25.59	25.98	25.13	24.51	23.99	24.53	24.23	24.91	24.42	25.04	23.84	24.01	24.23	23.08	24.69	24.69	24.94	25.22	24.49	25.67	24.69	25.29	24.95	24.96	25.33	25.96	24.52	24.15	25	24.61	25.69	25.09	23.5	25.04	24.49	24.21	23.9	23.32	24.51	25.1	24.47	23.65
ALDOA_HUMAN	P04075	Fructose-bisphosphate aldolase A	13	0.17015	0.2638	0.851194	21.85	21.45	21.33	21.95	21.37	20.6	20.54	21.51	21.36	22.67	21.38	21.81	20.89	19.82	21.65	21.51	21.63	20.86	21.38	22.06	21.37	20.97	21.47	22.14	22.27	21.86	20.8	20.83	22.91	22.19	20.98	21.64	21.53	22.22	21.29	22.69	22.49	22.65	22.84	21.65	22.74	21.91	21.35
AMY1_HUMAN	P04745	Alpha-amylase 1	60	0.039892	0.794727	0.968887	26.75	26.63	27.78	27.88	26.69	25.6	25.87	26.8	27.17	24.76	24.77	26.08	25.84	25.78	26.39	27.81	28.09	27.64	27.24	27.23	26.74	26.85	26.49	26.56	26.44	25.95	24.98	25.22	26.5	25.19	23.83	24.79	25.32	26.08	26.76	25.3	26.25	25.89	26.77	27.01	27.67	27.39	23.65
AMY2B_HUMAN	P19961	Alpha-amylase 2B	42	0.0662997	0.665223	0.948464	26.88	26.91	27.96	27.94	26.96	25.96	26.32	27.06	27.41	25.6	24.99	26.37	26.42	25.62	26.77	27.82	28.17	27.76	27.33	27.15	27.17	27.18	26.64	26.97	26.77	26.41	25.53	25.59	26.79	25.6	24.34	25.11	25.77	26.89	27.02	26.04	26.61	26.43	27.03	27.34	27.97	27.56	23.9
AMYP_HUMAN	P04746	Pancreatic alpha-amylase	37	0.0798721	0.60198	0.932248	26.77	26.87	27.87	27.79	26.85	25.9	26.24	26.94	27.23	25.71	24.86	26.21	26.35	25.99	26.65	27.64	28.03	27.6	27.13	26.92	27.1	27.15	26.54	26.97	26.78	26.35	25.28	25.46	26.7	25.54	24.1	25.04	25.63	26.8	26.83	25.99	26.58	26.39	26.81	27.29	27.91	27.49	23.59
ANXA1_HUMAN	P04083	Annexin A1	42	-0.0479502	0.754442	0.953071	23.95	24.01	23.54	23.57	24.22	23.76	23.46	23.66	23.84	24.63	23.92	23.79	24.4	23.71	24.24	24.63	24.32	24.01	23.32	22.79	24.4	24.18	23.6	23.33	23.32	24.48	23.05	22.82	24.12	24.32	24.05	23.23	23.29	24.6	24.06	23.93	23.55	23.61	23.93	24.19	23.91	23.97	24.04
ANXA2_HUMAN	P07355	Annexin A2	24	0.06034	0.693772	0.948464	22.92	22.59	21.23	21.1	22.86	20.65	22.26	21.79	21.98	22.89	22.31	21.96	22.57	20.76	22.11	23.27	21.92	22.09	21.63	22.08	22.9	22.97	22.77	20.79	21.54	22.78	22.19	21.91	20.49	23.09	21.92	22.03	21.94	23.06	22.12	21.95	21.34	20.85	20.63	21.93	21.72	22.51	23.33
ANXA3_HUMAN	P12429	Annexin A3	8	0.193979	0.201673	0.851194	20.86	19.98	20.64	21.28	20.53	20.67	17.57	17.62	19.58	20.18	19.38	18.29	18.44	16.19	17.79	20.37	19.97	20.51	20.46	19.96	20.16	19.46	18.91	19.91	21.02	21.38	19.81	19.23	21.75	20.02	17.73	18.27	18.78	19.4	18.46	16.65	20.47	18.5	20.58	19.6	21.05	20.45	17.31
ANXA5_HUMAN	P08758	Annexin A5	4	0.00946153	0.950814	0.990093	13.92	15.71	15.17	16.91	17.14	16.65	13.63	15.67	14.04	14.68	16.45	8.48	13.16	10.98	9.2	20.32	16.27	17.37	16.03	17.15	15.75	17.26	13.1	16.42	16.1	13.96	15.12	12.14	16.67	20.04	14.16	13.23	13.14	15.6	14.58	10.73	16.17	15.45	14.62	13.74	15.43	15.29	14.88
ANXA8_HUMAN	P13928	Annexin A8	4	-0.0995246	0.515394	0.894088	18.9	14.07	12.39	12.74	17.95	15.12	12.36	10.78	12.04	15.41	20.36	16.74	12.66	16.43	13.03	16.59	18.03	17.75	15.57	16.82	18.17	15.5	16.37	12.48	13.19	18.04	16.51	17.77	16.71	18.1	13.58	19.61	19.86	16.37	16.41	13.43	14.98	14.18	15.04	18.1	16.77	19.78	18.33
APOA1_HUMAN	P02647	Apolipoprotein A-I	16	0.156863	0.303458	0.866501	20.32	22.13	22.47	21.82	14.52	17.5	16.78	14.26	14.39	12.04	18.41	15.11	14.71	17.21	16.53	20.07	20.61	21.19	22.88	19.47	19.41	17.28	16.17	20.72	21.29	17.31	20.67	19.56	19.7	22.55	18.7	20.82	20.41	10.72	17.87	12.36	16.15	15.13	16.18	17.53	16.95	17.11	16.39
APOA2_HUMAN	P02652	Apolipoprotein A-II	2	0.0567217	0.711314	0.953071	21	21.08	22.48	21.09	14.35	19.39	19.05	15.42	15.02	15.21	19.44	13.98	17.07	20.07	18.96	18.45	20.23	21.01	20.78	19.11	19.16	17.56	19.42	19.87	20.26	28.46	21.47	18.97	14.85	21.58	18.8	18.89	9.34	14.81	17.85	13.05	13.81	10.21	14.38	20.01	19.78	18.25	13.75
ARF1_HUMAN	P84077	ADP-ribosylation factor 1	3	0.172625	0.256812	0.851194	17.35	19.79	17.12	14.05	21.33	10.28	13.07	16.67	16.93	15.44	20.59	18.05	16.38	14.66	13.57	13.69	16.81	18.12	16.99	17.88	16.32	18.99	17.51	11	16.28	18.51	17.48	15.59	17.65	19.97	16.4	19.35	20.06	17.04	18.35	17.31	17.88	13.43	11.34	16.27	18.08	18.71	18.09
ARF3_HUMAN	P61204	ADP-ribosylation factor 3	3	0.172625	0.256812	0.851194	17.35	19.79	17.12	14.05	21.33	10.28	13.07	16.67	16.93	15.44	20.59	18.05	16.38	14.66	13.57	13.69	16.81	18.12	16.99	17.88	16.32	18.99	17.51	11	16.28	18.51	17.48	15.59	17.65	19.97	16.4	19.35	20.06	17.04	18.35	17.31	17.88	13.43	11.34	16.27	18.08	18.71	18.09
ARP2_HUMAN	P61160	Actin-related protein 2	5	0.0648267	0.672238	0.948464	16.62	18.42	16.56	15.19	19.37	15.2	16.05	15.83	17.67	17.95	18.07	16.01	16.51	16.28	14.7	15.89	14.65	17.22	18	20.04	16.17	17.19	17.33	15.28	18.69	18.34	19.04	20.71	19.8	19.15	19.11	18.68	19.3	15.68	13.37	15.54	15.89	18.73	14.88	18.25	19.23	19.69	16.6
ARP3_HUMAN	P61158	Actin-related protein 3	4	0.234733	0.120638	0.810958	20.04	18.33	17.44	19	19.48	16.14	16.76	15.66	17.45	18.81	18.94	18.88	17.22	19.64	17.26	17.9	19.55	19.84	19.87	19.88	18.95	18.35	20.03	17.88	19.8	19.35	19.75	20.62	18.74	19.88	18.88	16.69	17.85	16.03	16.87	17.43	16.69	14.6	19.37	17.98	20.52	19.12	16.48
ARPC3_HUMAN	O15145	Actin-related protein 2/3 complex subunit 3	2	0.174211	0.252402	0.851194	20.4	17.44	18.19	19.93	20.21	15.06	17.9	17.67	19.25	18.4	20.04	17.6	17.75	15.86	17.29	18.46	16.46	16.46	19.01	16.93	15.08	17.19	18.62	16.83	20.43	20.5	19.88	20.37	20.97	20.83	19.43	18.83	19.63	16.97	15.77	14.34	17.12	16.85	19.43	19.68	20.87	19.12	19.64
ARPC4_HUMAN	P59998	Actin-related protein 2/3 complex subunit 4	2	0.0920697	0.547492	0.898202	20.04	17.27	14.27	17.3	20.03	15.37	13.33	19.34	18.33	20.45	20.54	17.96	13.2	16.15	17.83	11.86	17.78	19.99	20.56	18.87	19.99	19.13	14.7	17.24	19.71	20.1	20.14	21.09	21.1	21.06	14.52	18.54	20.28	18.98	13.52	14.12	17	13.8	17.76	19.64	20.84	19.76	15.66
ATPA_HUMAN	P25705	ATP synthase subunit alpha, mitochondrial	7	0.0548839	0.720282	0.953071	20.7	18.67	15.63	17.84	19.78	16.15	17.38	16.28	19.06	20.68	19.93	16.77	14.69	15.53	18.33	16.99	18.44	19.48	18.86	18.78	17.92	19.8	19.77	17.02	19.11	19.92	19.85	20.63	18.45	21	19.78	19.63	19.65	20.63	17.62	18.51	19.27	14.7	16.21	19.74	20.72	19.17	20.4
ATPB_HUMAN	P06576	ATP synthase subunit beta, mitochondrial	10	0.204755	0.177263	0.848877	21.22	20.74	20.32	20.3	20.35	19.96	18.4	19.87	20.21	21	20.14	20.01	18.48	19.83	20.45	19.49	20.34	20.42	19.84	20.13	20.68	20.46	20.27	20.33	20.54	20.49	20.51	21.13	20.46	21.24	20.15	20.18	20.22	20.93	20.51	20.38	20.84	20.35	19.19	20.68	21.52	20.56	20.55
AXA2L_HUMAN	A6NMY6	Putative annexin A2-like protein	18	0.116318	0.446709	0.871703	23.05	22.66	21.17	21.58	22.98	20.37	22.2	21.94	22.19	22.87	22.5	22.09	22.66	21.23	22.33	23.48	22.31	22.18	21.56	22.15	22.93	23.01	22.8	20.92	21.67	22.87	22.07	21.74	21.02	23.21	21.77	22.17	22.31	23.08	22.26	21.91	21.42	21.49	20.73	21.92	21.7	22.64	23.57
AXA81_HUMAN	Q5T2P8	Annexin A8-like protein 1	4	-0.0995246	0.515394	0.894088	18.9	14.07	12.39	12.74	17.95	15.12	12.36	10.78	12.04	15.41	20.36	16.74	12.66	16.43	13.03	16.59	18.03	17.75	15.57	16.82	18.17	15.5	16.37	12.48	13.19	18.04	16.51	17.77	16.71	18.1	13.58	19.61	19.86	16.37	16.41	13.43	14.98	14.18	15.04	18.1	16.77	19.78	18.33
AXA82_HUMAN	Q5VT79	Annexin A8-like protein 2	4	-0.0995246	0.515394	0.894088	18.9	14.07	12.39	12.74	17.95	15.12	12.36	10.78	12.04	15.41	20.36	16.74	12.66	16.43	13.03	16.59	18.03	17.75	15.57	16.82	18.17	15.5	16.37	12.48	13.19	18.04	16.51	17.77	16.71	18.1	13.58	19.61	19.86	16.37	16.41	13.43	14.98	14.18	15.04	18.1	16.77	19.78	18.33
B2MG_HUMAN	P61769	Beta-2-microglobulin	2	0.112508	0.461834	0.871703	19.85	14.6	21.09	21.19	18.63	18.21	13.32	19.54	15.36	16.23	14.75	21.35	19.78	12.57	12.83	23.06	20.11	21.1	18.45	18.35	8.25	21.24	20.85	18.92	19.77	15.14	17.31	24.62	19.19	23.84	13.66	17.88	13.11	13.2	16.55	19	10.66	19.76	14.44	18.16	16.02	17.82	5.32
BPIL1_HUMAN	Q8N4F0	Bactericidal/permeability-increasing protein-like 1	14	0.223461	0.14006	0.848877	20.63	18.99	20.91	22.04	19.26	19.52	19.73	20.05	18.01	20.43	19.52	19.96	21.46	18.07	19.81	17.66	18.14	20.83	18.63	17.43	22.3	21.59	20.31	21.44	21.34	20.53	15.9	17.62	18.81	22.52	20.23	22.17	22.89	21.06	20.97	20.68	21.87	21.64	22.36	21.37	21.85	20.03	19.35
BPI_HUMAN	Q9H203	Bactericidal permeability-increasing protein	4	0.105382	0.490854	0.886468	21.44	19.63	21.44	21.53	19.61	19.59	12.54	16.08	20.45	17.86	16.23	15.83	16.48	16.69	17.76	20.63	20.12	20.76	20.97	20.72	19.33	17.13	14.01	21.94	19.47	21.5	21.2	22.33	22.31	21.35	18.09	16.12	18.67	16.75	15.93	15.62	19.56	16.05	18.86	16.11	21.01	17.34	12.87
CAH6_HUMAN	P23280	Carbonic anhydrase 6	12	0.214476	0.15713	0.848877	22.39	23.21	24.4	24.69	23.2	23.41	22.91	24.25	23.44	23.58	22.85	23.69	23.43	24.01	24.35	20.04	20.96	20.82	20.72	18.59	25.23	24.99	24.71	24.22	24.74	23.83	20.16	20.47	23.35	24.41	21.47	24.37	24.66	24.45	24.39	23.66	23.61	23.73	24.05	24.77	25.03	24.21	21.88
CALL3_HUMAN	P27482	Calmodulin-like protein 3	4	0.182576	0.229978	0.851194	22.12	22.35	21.16	20.71	22.57	20.91	20.07	21.02	20.35	21.88	21.54	21.64	19.34	19.51	21.47	23.26	21.86	21.23	21.56	21.84	22	21.58	22.28	22.47	22.8	21.83	21.5	21.84	22.41	20.2	20.7	22.12	22.12	22.25	21.66	22	22.56	22.54	22.51	22.38	22.55	22.29	20.55
CALR_HUMAN	P27797	Calreticulin	4	-0.0224968	0.883381	0.989513	18.96	18.32	17.48	16.58	18.81	20.08	14.81	11.44	15.6	20.7	19.53	15.06	15.26	14.68	18.77	17.98	20.64	20.42	19.18	19.14	20.53	20.62	18.77	16.77	16.89	20.71	19.5	17.11	20.24	18.44	18.96	19.63	17.25	15.71	20.51	16.84	16.03	17.65	19.44	20.83	21.16	20.76	17.98
CALX_HUMAN	P27824	Calnexin	5	0.0684687	0.654946	0.948464	17.58	17.23	15.45	17.2	17.03	17.04	12.38	17.3	15.31	16.74	16.9	14.96	15.85	13.13	14.6	20.21	19.45	19.52	19.73	19.55	16.49	19.87	17.48	14.82	14.04	18.57	17.36	16.82	15.54	19.78	14.63	15.49	19.09	12.33	14.52	12.92	14.28	13.45	14.08	14.92	14.73	17.16	14.13
CAMP_HUMAN	P49913	Cathelicidin antimicrobial peptide	2	0.0650415	0.671213	0.948464	21.14	20.44	21.23	16.94	20.04	22.04	16.77	15.78	17.65	21.82	20.04	19.49	17.19	17.5	19.83	23.13	21.71	20.99	21.63	21.52	21.09	17.85	19.64	21.68	21.17	21.72	21.04	22.18	21.35	21.67	20.05	19.18	20.38	17.59	19.41	17.43	20.86	20.93	22.28	20.9	21.1	19.78	19.06
CAN1_HUMAN	P07384	Calpain-1 catalytic subunit	9	0.0347346	0.820798	0.972591	17.09	17.21	16.17	16.25	18.33	15.39	13.9	15.1	14.83	19.66	20.17	14.47	14.16	14.05	17.34	16.01	15.54	16.87	17.46	15.3	17.18	20.1	15.16	16.25	13.21	18.12	17.16	19.8	16.69	20.2	16.29	17.55	17.69	19.17	16.76	15.02	13.95	15.07	14.76	18.86	19.38	18.61	16.32
CAP1_HUMAN	Q01518	Adenylyl cyclase-associated protein 1	5	0.139555	0.360555	0.866501	20.99	20.37	18.43	21.01	20.67	19.04	18.79	19.51	19.12	20.58	19.86	19.74	17.03	17.68	17.67	19.04	17.25	20.22	20.83	20.4	18.62	18.12	19.44	19.36	20.27	19.61	20.96	21.19	20.35	20.46	21.14	19.96	20.38	19.42	19.35	19.03	18.76	19.62	19.5	19.39	20.91	20.43	19.96
CAP7_HUMAN	P20160	Azurocidin	5	-0.0630446	0.680761	0.948464	21.04	20.75	22.08	18.29	20.38	19.75	19.06	19.56	20.08	21.76	19.44	20.2	14.2	15.74	24.31	22.5	22.28	21.56	22.75	22.16	20.13	18.82	18.83	19.84	21.27	22.77	23.16	23.55	23.9	21.7	21.15	20.19	20.63	21.74	15.21	19.17	20.15	17.7	20.45	20.2	20.95	21.18	21.82
CAPG_HUMAN	P40121	Macrophage-capping protein	3	0.136543	0.371117	0.866501	19.74	18.77	16.05	18.27	19.43	17.12	15.18	18.83	16.26	20.45	19.63	18.9	13.28	15.51	19.08	18.53	19.78	19.77	20.22	19.75	17.43	17.82	19.31	19.35	20.23	20.1	19.98	20.73	20.47	20.87	20.74	19.6	19.46	17.7	18.8	17.12	16.63	18.48	18.1	18.82	21.1	19.54	17.31
CAPZB_HUMAN	P47756	F-actin-capping protein subunit beta	3	0.186304	0.220441	0.851194	20.55	20.09	20.24	20.42	18.56	18.18	13.62	18.65	19.61	20.58	19.16	18.44	17.42	14.74	19	21.16	19.63	20.51	20.48	20.65	18.94	17.96	19.33	16.85	19.94	20.32	19.25	18.24	20.78	18.68	18.92	16.24	17.45	18.86	17.82	16.54	17.71	15.92	17.83	18.47	20.6	17.42	17.63
CATA_HUMAN	P04040	Catalase	3	0.313247	0.0361491	0.691001	14.8	18.63	19.98	20.18	12.62	19.26	15	12.71	17.65	17.45	15.18	15.37	13.33	13.46	14.02	11	16.99	20.77	15.97	17.45	20.13	13.05	13.83	20.92	19.47	14.86	17.03	20.77	19.97	19.94	20.77	12.27	15.41	14.26	15.81	15.59	15.72	20.69	13.61	16.45	16.76	18.2	6
CATD_HUMAN	P07339	Cathepsin D	3	0.351226	0.0179955	0.691001	19.74	17.42	15.49	15.24	15.42	16.69	13.26	10.16	15.97	14.79	15.28	23.06	14.04	14.54	14.29	16.86	15.83	14.46	15.53	15.56	15.69	15.99	17.83	17.43	19.38	17.7	16.12	17.09	15.82	19.42	17.01	17.89	17.66	14.76	14.7	17.2	16.94	17.51	16.88	9.27	15.86	15.03	17.22
CATG_HUMAN	P08311	Cathepsin G	10	-0.105871	0.488831	0.886122	21.37	20.88	21.12	21.07	20.66	22.03	17.65	20.53	21.45	20.05	19.88	20.05	18.85	19.45	20.54	21.09	21.85	22.01	21.25	21.43	19.05	19.8	18.71	21.2	21.24	22.21	20.39	21.41	22.35	21.88	20.18	19.32	21.16	21.2	19.75	18.75	20.78	19.31	22.67	21.07	19.57	18.87	20.23
CAZA1_HUMAN	P52907	F-actin-capping protein subunit alpha-1	2	-0.0147592	0.923341	0.989513	21.02	20.83	19.69	19.23	20.45	22.3	19.38	20.48	20.69	21.44	20.98	18.8	18.84	19.05	20.89	18.42	18.35	20.26	20.78	19.97	20.24	21.1	20.42	20.89	21.23	20.96	20.93	21.04	21.17	21.03	21.6	20.44	20.59	21.11	20.79	20.13	20.9	21.17	20.13	20.99	21.49	20.25	20.98
CBR1_HUMAN	P16152	Carbonyl reductase [NADPH] 1	5	-0.0230751	0.880404	0.989513	16.18	18.3	13.44	8.79	16.94	14	10.94	11.27	16.36	19.79	20.11	16.42	13.94	14.23	17.59	12.85	16.55	18.86	15.33	13.08	16.2	18.26	18.78	9.69	10.88	17.8	13.26	21.2	15.45	16.72	13.25	17.74	15.92	18.85	17.3	12.46	9.59	12.35	15.19	18.46	17.7	17.76	16.59
CBR3_HUMAN	O75828	Carbonyl reductase [NADPH] 3	2	-0.00672224	0.965043	0.990093	20.01	19.21	7.2	12.49	19.27	14.13	12.35	13.32	11.87	16.39	19.1	15.62	16.64	15.16	18.94	18.91	14.46	13.74	18.26	16.62	18.08	21.33	14.42	12.57	9.51	19.57	16.35	15.23	16.9	12.62	16.15	13.03	16.76	17.05	14.35	16.83	17.69	15.42	12.35	17.57	15.06	16.79	8.14
CD040_HUMAN	Q6MZM9	Uncharacterized protein C4orf40	3	0.289666	0.0535996	0.692119	22.22	23.21	20.39	23.8	14.87	15.75	21.22	22.28	21.96	19.39	21.63	21.35	22.58	17.88	23.42	12.47	15.55	15.39	15.04	17.24	21.29	22.33	22.38	21.1	21.13	15.31	15.18	17.4	16.77	20.49	20.54	22	22.29	22.41	21.8	17.5	23.4	22.51	21.86	21.3	20.85	20.17	21.93
CDC42_HUMAN	P60953	Cell division control protein 42 homolog	2	-0.201618	0.184139	0.848877	7.98	8.85	7.69	18.4	13.96	12.57	12.35	11.92	16.35	15.73	16.08	10.33	6.95	13.55	12.42	19.31	20.39	14.76	17.25	16.31	15.57	15.31	8.9	20.34	1.92	17.83	14.99	13.38	17.01	21.45	9.28	17.73	18.14	15.38	17.95	18.62	11.23	13.56	11.8	14.62	10.71	12.84	14.97
CEAM5_HUMAN	P06731	Carcinoembryonic antigen-related cell adhesion molecule 5	2	0.0944404	0.537182	0.898202	20.99	20.79	15.71	20.16	18.24	21.16	19.37	19.94	18.97	21.52	20.36	20.26	18.84	16.41	20.68	16.73	18.91	20.27	14.27	19.36	15.02	20.91	18.94	21.34	21.73	20.32	18.3	23.82	19.22	22.37	16.76	19.66	21.27	20.13	23.51	16.6	21.52	21.24	21.18	22.54	21.6	19.19	20.58
CERU_HUMAN	P00450	Ceruloplasmin	5	0.177004	0.244758	0.851194	20.34	20.14	20.75	21.03	15.04	12.53	17.15	14.13	14.69	17.07	17.82	14.23	14.19	14.77	14.8	18.88	20.77	21.07	20.99	19.34	20.15	17.98	14.96	19.61	17.72	20.33	22.06	19.26	20	21.5	20.09	20.16	20.97	12.47	16.7	17.33	17.56	17.27	17.75	18.17	17.98	18.91	15.45
CF058_HUMAN	Q6P5S2	UPF0762 protein C6orf58	8	-0.222607	0.14162	0.848877	21.56	21.59	20.24	18.17	22.03	22.27	21.09	20.43	19.88	22.58	20.75	21.42	22.13	20.34	20.65	22.29	20.67	20.96	20.92	21.54	19.88	18.01	18.18	20.94	20.37	22.52	20.13	20.74	22.32	19.75	18.96	21.82	21.76	23.05	21.47	22.4	22.33	22.57	22.98	21.97	22.35	21.12	19.3
CFAB_HUMAN	Q9BX92	Complement factor B	2	-0.107737	0.48116	0.878799	11.24	14.85	15.94	12.74	10.95	13.77	14.02	3.33	12.35	7.27	8.33	1.23	8.93	9.34	9.5	14.07	17	16.36	17.9	15.15	12.61	15.97	15.07	13.78	15.62	6.3	18.66	12.16	13.62	20.4	14.55	11.32	16.11	7.04	15.08	7.07	16.49	14.22	18.5	14.06	18.64	13.4	6.37
CH60_HUMAN	P10809	60 kDa heat shock protein, mitochondrial	4	0.133119	0.383346	0.866501	14.56	16.96	14.32	16.26	15.94	11.18	14.78	16.81	18.06	18.97	18.12	12	16.83	16.08	18.2	15.52	15.9	15.61	16.16	16.22	18.59	20.07	17.17	15.07	17.15	19.94	13.13	17.51	13.89	20.25	16.26	12.74	17.63	19.27	15.62	15.45	15.81	15.02	15.85	17.88	16.84	16.8	14.79
CKAP4_HUMAN	Q07065	Cytoskeleton-associated protein 4	2	0.0309397	0.840106	0.980951	13.03	13.7	10.86	10.59	18.1	8.27	16.07	10.79	14.93	19.51	18.88	8.42	12.34	12.5	14.5	13.99	14.32	9.76	10.57	17.54	16.32	19.28	13.74	10.3	10.96	17.56	17.14	18	10.82	11.6	10.09	7.05	15.43	19.45	14.81	14.37	14.75	18.81	12.2	19.6	16.61	17.36	14.26
CLCA4_HUMAN	Q14CN2	Calcium-activated chloride channel regulator 4	2	0.248468	0.0998067	0.792107	19.38	11.74	17.91	16.25	15.89	15.61	14.83	13.14	16.88	18.99	20.04	16.41	13.5	15.52	15.62	12.47	13.77	17.47	16.98	14.6	17.93	16.92	11.28	15.49	19.93	18.86	15.01	19.44	19.57	20.56	13.49	13.23	18.74	21.7	14.79	17.85	19.61	17.38	12.09	14.83	20.23	15.57	12.7
CLH1_HUMAN	Q00610	Clathrin heavy chain 1	13	0.179348	0.238464	0.851194	18.06	17.94	13.86	14.19	16.43	12.54	13.97	16.07	14.98	17.63	19.89	15	12.16	11.61	16.97	14.4	17.09	17.42	15.81	15.82	18.57	19.32	17.1	14.04	14.22	19.51	17.43	18.19	12.9	17.26	15.57	15.45	18.95	18.33	16.17	14	14.83	12.86	12.2	18.3	17.79	17.04	16.31
CLH2_HUMAN	P53675	Clathrin heavy chain 2	5	0.214155	0.157767	0.848877	17.55	20.69	12.09	14.15	14.64	11.86	13.28	14.98	14.42	17.1	19.48	14.14	10.3	11.49	15.09	14.47	13.71	16.32	14.41	13.76	17.91	18.09	15.93	12.96	15.52	19.34	18.39	18.03	12.52	15.86	15.79	15.83	19.47	18.48	14.74	12.7	15.16	13.53	11.66	17.33	18.6	17.54	16.59
CLIC1_HUMAN	O00299	Chloride intracellular channel protein 1	3	0.162538	0.286076	0.866501	19.41	18.46	17.44	17.28	19.28	18.7	18.69	16.21	16.84	20.87	20.19	19.16	17.23	15.71	19.31	17.89	18.74	18.26	18.42	18.31	19.44	20.29	19.56	18.25	18.36	19.62	17.39	18.77	17.44	21.52	19.37	17.94	19.7	19.96	17.84	19.11	20.01	18.2	18.44	19.6	20.35	18.84	18.21
CLIC3_HUMAN	O95833	Chloride intracellular channel protein 3	3	-0.0411916	0.788192	0.965784	10.74	16.18	11.07	13.35	18.31	14.29	14.54	17.59	17.55	20.92	19.57	15.49	15.63	10.07	17.14	16.86	18	13.75	15	17.91	19.66	16.93	17.67	15.95	11.82	16.79	15.21	16.23	12.27	11.01	15.09	18.65	19.78	15.31	16.92	16.87	13.4	11.66	14.9	19.97	16.78	19.15	17.52
CLUS_HUMAN	P10909	Clusterin	6	0.360258	0.0150603	0.691001	17.27	18.62	19.83	19.66	17.17	17.14	16.23	17.04	18.5	20.08	21.13	21.83	19.84	20.15	20.8	14.65	15.96	15.24	16.3	16.69	17.23	18.86	21.53	21.99	22.04	14.02	14.36	14.81	16.16	21.62	17.65	20.97	21.76	17.19	15.8	17.46	21.91	21.09	19.3	14.67	17.35	17.11	17.92
CO3_HUMAN	P01024	Complement C3	22	0.320416	0.0318839	0.691001	19.5	20.51	20.37	20.07	14.86	14.59	15.63	14.26	15.38	16.9	17.05	15.78	14.05	16.02	13.85	17.67	18.15	19.57	18.87	16.65	17.3	17.51	16.78	19.73	20.16	18.61	19.84	18.02	18.72	20.66	16.71	20.15	20.4	13.91	14.23	14.92	14.63	16.34	17.38	15.5	19.42	14.89	16.36
CO4A_HUMAN	Q5JQM8	Complement C4-A	4	0.117075	0.443734	0.871703	14.14	17.12	19.85	17.04	10.65	7.53	7.05	11.39	8.54	6.8	13.44	16.41	10.53	12.91	10.53	17.81	17.02	18.8	20.08	18.39	15.11	19.15	16.22	14.3	13.09	15.41	21.15	17.33	18.29	16.15	9.48	12.55	12.51	9.76	13.7	9.79	10.86	7.33	19.49	18.22	20.66	14.04	9.42
CO4B_HUMAN	Q9UIP5	Complement C4-B	4	0.117075	0.443734	0.871703	14.14	17.12	19.85	17.04	10.65	7.53	7.05	11.39	8.54	6.8	13.44	16.41	10.53	12.91	10.53	17.81	17.02	18.8	20.08	18.39	15.11	19.15	16.22	14.3	13.09	15.41	21.15	17.33	18.29	16.15	9.48	12.55	12.51	9.76	13.7	9.79	10.86	7.33	19.49	18.22	20.66	14.04	9.42
COF1_HUMAN	P23528	Cofilin-1	7	0.265328	0.0781515	0.760251	22.07	21.76	21.31	22.28	20.06	21.65	19.35	21.22	21.24	21.6	20.94	19.83	19.47	19.29	20.78	18.65	20.75	20.49	19.78	20.01	22.13	21.95	21.34	21.06	21.62	21.82	21.74	22.04	21.89	20.97	22.76	20.91	21.36	20.39	20.99	20.03	21.47	18.33	22.29	21.37	21.54	21.45	21.78
COF2_HUMAN	Q9Y281	Cofilin-2	4	0.155176	0.308754	0.866501	21.6	21.15	21.08	21.69	18.53	21.5	18.2	20.67	20.71	21.44	20.33	18.62	18.49	18.1	19.69	20.63	20.93	20.4	21.18	20.93	21.53	21.45	20.34	20.13	20.85	21.27	21.45	22.05	21.41	21.34	22.12	20.01	20.9	18.74	20.11	18.36	21.03	16.17	21.78	20.85	20.97	20.74	21.1
COR1A_HUMAN	P31146	Coronin-1A	9	0.178897	0.239667	0.851194	20.58	18.44	21.09	21.67	18.35	20.43	16.05	17.11	19.74	20.92	16.92	15.96	14.49	15.84	15.98	19.55	19.01	18.57	19.7	19.06	18.25	18.73	17.88	20.52	20.89	21.04	20.11	20.74	21.2	21.18	20.29	18.89	18.44	14.98	17.29	17.21	18.01	18.36	20.32	17.32	21.87	17.81	18.23
CRIS3_HUMAN	P54108	Cysteine-rich secretory protein 3	5	0.113656	0.457249	0.871703	16.85	19.38	19.18	21.35	18.15	20.32	22.24	22.55	20.53	23.11	23.04	22.89	23.15	20.76	21.64	17.38	15.75	21.22	15.88	16.58	21.37	20.59	18.74	22.5	20.65	22.19	15.63	16.49	21.4	20.19	15.25	21.93	20.04	22.29	21.43	21.63	22.57	22.31	22.54	21.8	22.88	20.33	14.36
CRNN_HUMAN	Q9UBG3	Cornulin	18	-0.344678	0.0204134	0.691001	23.75	23.75	21.86	21.79	23.8	22.56	22.11	22.61	22.32	23.64	23.21	23.21	23.2	22.72	23.32	24.23	23.68	23.21	22.57	22.92	22.73	21.68	22.08	21.55	21.17	23.13	23.33	23.31	21.8	22.81	22.49	22.63	22.78	23.35	23.17	23.31	22.72	22.77	23.59	23.47	23.2	23.37	22.51
CRYAB_HUMAN	P02511	Alpha-crystallin B chain	5	0.248382	0.099927	0.792107	15.5	15.69	16.52	13.05	18.61	16.44	14.59	18.75	16.48	20.71	19.88	21.25	15.96	15.43	18.64	13.75	18.56	19.39	17.9	18.35	19.87	19.47	18.04	18.94	19.72	18.28	16.43	19.56	17.94	15.27	15.54	18.27	19.04	17.27	17.02	14.81	18.77	17.57	15.85	20.01	20.9	19.28	16.35
CTNB1_HUMAN	P35222	Catenin beta-1	2	0.0966106	0.527827	0.89638	19.89	18.82	15.95	17	16.78	17.38	14.43	16.56	18.47	20.55	21.53	17.33	13.55	16.73	17.2	21.54	20.83	20.67	20.63	21.06	20.71	21.09	19.43	14.67	17.25	17.22	20.7	21.01	13.92	20.76	13.85	18.26	19.46	16	17.54	17.94	18.36	16.67	20.29	13.8	17.57	16.1	13.83
CYC_HUMAN	P99999	Cytochrome c	5	0.0725677	0.635695	0.946697	26.89	25.56	25.47	25.84	25.73	23.12	23.35	25.13	25.73	22.5	23.13	23.7	22.56	25.1	24.36	24.91	26.52	26.06	24.47	25.2	24.76	24.44	25.44	25.17	26.53	25.28	25.8	26.6	25.85	23.83	24.43	25.13	25.24	24.62	24.51	24.8	25.26	25.16	25.24	24.77	24.97	24.75	24.51
CYTA_HUMAN	P01040	Cystatin-A	4	0.0544151	0.722576	0.953071	22.68	22.24	22.02	21.25	23.76	23.64	21.46	21.76	20.94	22.82	22.21	22.82	21.21	17.71	19.16	24.15	23.85	23.02	22.3	23.12	21.26	21.36	21.91	21.28	23.9	20.83	20.04	20.72	23.47	22.22	21.06	22.21	22.38	20.65	19.36	23.77	23.16	22.97	23.12	22.36	23.85	22.72	19.92
CYTB_HUMAN	P04080	Cystatin-B	10	0.0576308	0.706892	0.950377	24.57	23.83	24.47	23.87	25.52	25.83	25.73	24.5	24.9	26.92	25.41	25.64	25.96	24.09	24.66	24.2	24.49	25.39	23.2	23.91	24.89	24.51	23.92	24.98	25.27	25	24.19	24.96	26.33	25.15	24.98	24.49	24.51	24.97	25.17	24.89	25.28	25.93	26.92	25.14	25.63	24.93	25.2
CYTC_HUMAN	P01034	Cystatin-C	7	0.228911	0.130399	0.841506	22.44	23.12	21.94	22.3	21.67	22.78	22.4	19.74	21.82	22.12	22.13	21.83	23.39	19.66	21.97	22.65	20.46	21.3	21.47	21.7	22.24	22.15	22.31	22.2	21.96	21.97	21.71	18.97	21.74	22.04	20.72	22.69	22.48	21.04	21.7	22.41	22.67	22.69	19.91	21.62	20.48	21.3	23.57
CYTD_HUMAN	P28325	Cystatin-D	6	0.124459	0.415315	0.870123	23.79	24.2	23.95	24.34	23.11	24.38	22.59	23.94	24.17	19.18	21.13	21.19	22.01	21.81	23.45	20.1	23.32	22.4	22.06	22.44	24.9	23.65	22.09	23.63	21.65	21.8	23.63	18.91	21.42	22.2	20.06	22.98	23.96	21.99	18.37	21.58	18.52	20.69	21.49	20.59	19.47	19.65	18.87
CYTN_HUMAN	P01037	Cystatin-SN	13	0.053236	0.728355	0.953071	25.34	25.74	24.88	25.19	23.24	25.01	24.54	24.95	24.59	23.08	24.84	25.89	23.06	22.33	23.91	24.97	22.46	24.25	24.03	23.74	25.64	23.73	23.65	24.47	24.52	21.44	22.22	21.08	24.62	24.41	23.68	25.06	25.09	23.23	23.61	21.38	24.66	23.37	25.58	24.18	24.65	24.95	24.84
CYTS_HUMAN	P01036	Cystatin-S	15	0.28719	0.0557699	0.692119	25.27	25.99	25.46	25.47	23.17	25.39	24.26	24.74	24.18	24.1	25.24	26.47	22.94	22.8	23.62	24.73	22.1	23.63	24.29	22.79	26.2	23.96	24.67	24.72	24.67	22.07	24.42	22.39	25.15	24.47	23.3	25.24	25.17	23.6	23.4	22.64	24.52	23.48	25.41	23.51	23.97	24.46	23.44
CYTT_HUMAN	P09228	Cystatin-SA	8	0.203792	0.179354	0.848877	24.77	25.14	23.76	24.06	23.16	24.33	23.79	23.9	23.14	23.46	24.93	25.95	22.94	22.07	22.78	23.37	20.48	22.02	23.19	22.57	24.67	22.58	23.68	23.73	23.53	20.98	22.6	21.87	23.81	23.43	23.35	24.04	23.91	21.99	23.27	20.81	22.85	21.88	25.08	23.42	23.88	24.07	24.44
DESM_HUMAN	Q8TD99	Desmin	2	0.0779191	0.610919	0.932653	13.25	20.1	20.45	21.23	18.99	11.48	12.72	14.32	18.87	14.41	14.35	15.72	13.55	18.65	16.06	20.54	20.47	17.94	20.15	17.42	18.17	14.33	18.2	19.57	20.96	20.53	16.78	14.1	21.15	20.98	17.99	19.11	11.69	12.41	15.31	6.85	20.91	19.32	21.07	14.89	21.03	20.46	9.19
DESP_HUMAN	P15924	Desmoplakin	138	-0.0509538	0.739583	0.953071	19.35	18.88	15.09	15.49	19.18	15.18	17.5	19.22	17.9	20.92	21.83	18.51	16.76	15.68	20.14	19.94	19.8	20.46	18.16	19.38	20.51	21.2	20.62	15.1	16.7	20.1	18.56	18.74	14.3	18.73	18.13	20.35	20.34	20.69	19.33	19.22	15.43	15.62	14.88	20.73	18.8	19.55	17.57
DMBT1_HUMAN	Q9Y4V9	Deleted in malignant brain tumors 1 protein	9	-0.44799	0.0020288	0.327313	23.07	22.95	21.86	22.72	23.52	23.56	23.9	23.67	23.89	21.94	23.37	23.69	24.46	23.27	23.6	23.36	23.34	22.9	22.7	23.97	21.34	21.12	21.83	22.99	22.91	22.14	21.64	23.28	22.56	23.14	22.61	23.2	23.59	23.84	22.47	22.71	23.75	23.21	23.32	22.79	23.31	22.7	22.84
DSC2_HUMAN	Q02487	Desmocollin-2	6	0.317923	0.0333172	0.691001	18.73	18.54	15.46	17.55	17.76	16.18	17.68	18.34	18.75	19.82	21.78	20.99	15.82	16.52	18.23	16.1	17.53	19.27	17.83	19.7	17.68	20.65	18.62	20.06	21.17	19.71	16.38	20.66	19.3	19.69	19.69	20.07	20.54	18.88	16.19	18.01	18.1	19.67	20.11	17.95	19.43	19.13	17.82
DSG1_HUMAN	Q02413	Desmoglein-1	10	0.131613	0.388796	0.866501	12.66	14.13	15.42	13.13	17.91	16.26	15.09	16.33	18.28	18.76	20.79	18.97	15.55	13.17	17.31	14.67	15.15	13.85	13.77	17.23	15.26	17.5	16.59	16.65	17.26	17.38	16.17	19.05	16.24	11.26	12.19	20.19	19.43	19.94	11.64	13.76	18.33	14.59	16.12	17.86	18.96	12.84	15.27
DSG3_HUMAN	P32926	Desmoglein-3	7	0.346057	0.0198827	0.691001	16.59	18.1	19.57	18.69	17.77	20.5	19.6	19.5	19.73	21.48	21.67	20.98	15.7	17.45	19.02	18.01	17.37	19.55	17.85	17.74	20.65	21.39	20.45	22.28	21.87	19.77	17.73	18.22	20.85	17.38	18.3	19.54	19.61	20.67	20.27	19.22	21.34	21.64	19.56	20.42	21.64	19.93	18.08
DYL1_HUMAN	P63167	Dynein light chain 1, cytoplasmic	3	0.067163	0.661125	0.948464	17.98	17.14	15.99	14.86	17.78	13.73	13.22	20.19	18.06	18.51	20.78	19.9	14.67	13.1	19.47	19.07	20.28	20.08	16.08	15.77	20.28	20.36	17.26	13.66	16.29	19.96	16.3	13.15	20.09	20.77	16.99	18.72	18.41	20.74	17.76	18.27	12.9	15.68	14.14	20.14	19.45	18.46	13.03
ECM1_HUMAN	Q8IZ60	Extracellular matrix protein 1	4	-0.17298	0.255821	0.851194	15.09	16.64	15.55	11.68	17.38	9.92	15.62	17.61	18.16	14.25	17.28	13.61	12.14	11.48	17.45	17.16	16.19	15.94	16.49	13.93	13.23	17.39	12.53	15.15	13.29	13.29	17.27	17.65	15.48	19.71	13.83	19.24	19.55	18.16	17.97	17.58	12.44	14.58	9.1	18.24	24.14	19.52	17.37
EF1A1_HUMAN	P68104	Elongation factor 1-alpha 1	16	0.0467289	0.760509	0.953071	23.01	22.37	21.36	21.52	22.53	21.43	21.89	22.24	22.12	22.32	22.78	22.45	20.76	21.87	22.28	22.15	22.5	22.34	22.43	21.34	22.74	22.85	22.26	20.54	21.37	22.56	22.34	22.45	21.57	22.5	22.31	22.21	22.43	22.19	22.16	21.27	21.01	20.37	21	22.43	21.88	21.97	22.18
EF1A2_HUMAN	Q05639	Elongation factor 1-alpha 2	9	-0.185103	0.223482	0.851194	23.54	22.99	21.56	21.08	22.91	22.89	22.35	22.66	22.4	22.86	23.17	22.89	22.41	22.87	22.97	23.07	22.69	22.4	23.55	21.65	23.02	23.1	22.81	22.03	22.06	22.97	22.53	22.65	21.33	22.76	22.79	22.92	22.78	22.71	22.81	22.88	22.02	21.86	22.77	23.13	22.04	22.27	22.89
EF1A3_HUMAN	Q5VTE0	Putative elongation factor 1-alpha-like 3	16	0.0467289	0.760509	0.953071	23.01	22.37	21.36	21.52	22.53	21.43	21.89	22.24	22.12	22.32	22.78	22.45	20.76	21.87	22.28	22.15	22.5	22.34	22.43	21.34	22.74	22.85	22.26	20.54	21.37	22.56	22.34	22.45	21.57	22.5	22.31	22.21	22.43	22.19	22.16	21.27	21.01	20.37	21	22.43	21.88	21.97	22.18
EF1G_HUMAN	P26641	Elongation factor 1-gamma	4	-0.0667755	0.662963	0.948464	20	18.46	16.37	18.92	20.09	16.28	17.1	18.21	18.59	20.57	20.55	18.64	17.35	16.01	19.26	19.44	19.87	19.24	16.49	19.65	19.67	20.71	18.95	13.05	13.48	19.22	19.3	19.88	19.58	20.82	19.96	19.52	20.33	20.53	16.2	20.01	17.52	15.99	16.56	19.17	19.66	18.78	19.77
EF2_HUMAN	P13639	Elongation factor 2	23	0.108965	0.476146	0.877933	20.07	18.37	14.61	14.94	18.74	13.78	15.7	18.58	18.3	19.86	20.41	16.18	15.46	15.09	19.74	16.38	18.82	18.44	15.99	16.45	20.14	20.38	18.54	15.72	17.02	19.36	16.04	18.26	14.71	19.32	16.03	19.09	19.99	19	17.78	16.73	15.2	15.73	15.52	19.06	18.17	18.82	18.38
ELNE_HUMAN	P08246	Neutrophil elastase	9	0.0252893	0.869024	0.984439	21.49	20.13	22.1	21.96	21.48	21.59	15.5	19.9	21.65	20.01	16.78	18.9	18.02	16.32	19.22	23.68	23.47	22.65	22.34	22.41	22	21.22	18.68	20.46	21.01	21.86	20.08	20.5	22.56	22.45	20.39	19.94	21.41	19.14	18.84	17	22.01	17.74	23.02	19.53	22.31	20.9	17.12
ENOA_HUMAN	Q6GMP2	Alpha-enolase	24	0.178002	0.242063	0.851194	22.46	22.31	22.48	22.62	22.62	21.91	21.6	22.1	22.2	22.43	21.9	22.06	20.09	20.39	21.41	21.83	22.31	22.07	22.36	22.11	22.49	22.43	22.53	22.72	22.99	22.59	21.03	21.02	23.38	21.96	22.3	22.49	22.32	22.95	21.89	22.59	22.56	22.52	23.25	22.25	23.24	22.68	20.94
ENPL_HUMAN	P14625	Endoplasmin	2	0.0025292	0.986844	0.991089	15.4	18.09	13.36	12.01	18.11	15.14	15.4	18.96	13.25	16.36	20.82	12.59	18.36	19.59	16.09	17.43	17.02	17.18	17.41	17.7	18.09	21.54	20.01	19.52	20.48	17.58	12.98	19.42	14.48	19.57	20.06	18.4	17.06	17.9	15.74	18.68	13.71	15.11	13.43	20.6	20.28	16.71	16.75
ERO1A_HUMAN	Q96HE7	ERO1-like protein alpha	3	-0.0676991	0.658585	0.948464	19.26	18.12	12.8	15.95	20.7	17.74	14.63	18.24	17.61	18.35	20.49	18.52	19.22	17.54	20.36	18.53	19.18	21.25	18.28	19.69	17.9	18.22	17.84	18.67	17.51	20.37	18.64	21.35	19.96	18.46	15.1	16.71	20.76	20.97	18.71	19.26	18.43	19.1	16.86	17.63	21.35	18.79	20.3
EVPL_HUMAN	Q92817	Envoplakin	31	-0.11021	0.471091	0.876954	17.4	16.85	13.14	11.36	17.43	11.48	13.97	16.08	16.36	19.19	18.86	14.58	12.24	12.11	19.07	16.31	16.59	18.53	16.92	17.93	18.69	19.28	17.87	11.74	12.2	18.14	17.69	18.81	10.8	19.05	15.7	16.85	17.22	18.06	17.24	16.82	12.87	10.39	11.81	18.98	16.2	18.13	18.15
EZRI_HUMAN	P15311	Ezrin	13	0.104437	0.494771	0.888623	19.72	17.28	16.1	16.8	18.91	14.87	16.17	17.56	17.88	19.43	20.15	17.45	15.02	13.06	18.72	16.08	19.11	19.15	19.7	18.52	18.03	19.02	19.11	19.25	18.27	19.14	18.5	19.57	18.67	19.65	18.25	18.89	19.24	18.9	19.14	18.58	19.88	19.81	19.02	19.62	19.92	19.02	19.1
FABP5_HUMAN	Q01469	Fatty acid-binding protein, epidermal	4	0.139276	0.361527	0.866501	19.78	20.04	20.39	21.33	19.83	22.92	22.52	22.5	22.17	23.57	23.58	23.13	21.96	22.46	22	18.6	21.72	21.7	20.32	19.05	22.09	22.2	21.75	23.44	23.51	22.08	26.14	20.29	22.78	20.95	21.15	22.66	22.82	22.96	21.78	21.75	23.69	23.45	23.82	22.18	23.42	21.42	18.96
FAM25_HUMAN	Q5VTM1	Protein FAM25	3	0.174246	0.252305	0.851194	16.42	20.88	19.04	19.5	19.89	20.16	18.98	19.37	17.94	21.21	21.09	17.49	18.21	15.02	19.75	15.21	19.2	19.42	15.71	14.82	18.38	18.7	18.73	21.74	21.53	16.18	12.47	16.97	19.39	19.01	16.79	19.17	18.43	19.92	18.68	18.65	21.25	21.43	20.62	20.09	20.8	19.26	12.75
FAS_HUMAN	Q96IT0	Fatty acid synthase	3	-0.165529	0.277182	0.866501	14.74	13.7	15.68	13.15	13.38	8.88	7.1	17.58	17.11	16.33	16.29	12.27	14.34	13.92	10.09	13.36	10.84	19.07	14.98	14.22	12.15	12.68	13.12	9.87	13.94	18.37	16.47	14.55	10.14	13	13.83	17.91	17.55	11.2	14.58	14.93	11.82	12.14	20.17	15.84	19.07	16.72	11.63
FIBA_HUMAN	P02671	Fibrinogen alpha chain	2	0.0185569	0.903698	0.989513	21.92	22.16	21.64	22.14	18.48	18.96	18.99	15.61	17.46	13.71	18.63	14.4	16.86	18.39	20.55	22.85	22.13	22.26	22.72	21.88	22.05	20.42	18.91	20.77	21.1	21.41	23.69	21.67	18.44	23.23	19.14	20.8	20.67	9.61	18.48	17.08	17.95	17.71	20.97	19.87	21.16	21.15	19.25
FIBB_HUMAN	P02675	Fibrinogen beta chain	10	0.0434336	0.77695	0.959254	20.49	20.28	20.57	21.54	11.14	18.27	17.06	14.83	15.48	15.79	17.78	13	12.21	12.44	17.82	20.68	21.27	21.55	21.05	20.31	19.86	18.55	17.35	19.2	19.84	19.59	21.63	20.61	20.19	22.2	18.9	19.94	19.28	14.97	16.95	17	14.18	11.83	19.1	17.68	19.43	19.83	16.73
FIBG_HUMAN	Q9UC63	Fibrinogen gamma chain	7	0.0432883	0.777677	0.959254	21.91	22.06	21.87	21.82	16.63	20.3	20.42	18.32	14.95	20.12	20.58	16.96	18.8	18.94	18.16	22.35	18.31	22.3	22.92	21.86	21.8	19.61	16.42	21.05	21.18	21.03	23.41	20.5	19.96	23.08	17.47	19.84	20.94	18.25	17.03	18.43	13.03	15.35	20.8	20.18	21.99	19.9	17.61
FILA_HUMAN	P20930	Filaggrin	13	-0.0874724	0.567751	0.898202	14.42	11.23	10.6	11.51	16.11	10.36	14.42	17.88	18.24	17.24	17.67	17.75	14.97	11.78	18.62	18.55	16.73	16.5	13.46	15.31	16.27	15.09	17.09	11.93	15.26	19.6	16.86	16.87	10.21	16.16	14.38	19.17	17.95	20.29	13.77	19.68	18.25	17.94	10.83	15.02	12.75	15.9	11.6
FLNA_HUMAN	P21333	Filamin-A	4	-0.162588	0.285925	0.866501	12.59	12.22	12.6	15.42	11.9	14.71	14.13	10.04	14.96	10.86	15.64	9.18	8.56	13.54	14.66	15.68	13.52	18.84	15.65	16.68	13.78	12.27	12.66	15.69	13.27	19.08	18.7	20.35	19.61	15.4	15.99	13.62	13.24	16.05	10.82	16.79	19.12	10.32	13.77	12.5	16.92	14.52	13.88
G3P_HUMAN	P04406	Glyceraldehyde-3-phosphate dehydrogenase	33	0.261058	0.0832506	0.760251	22.86	22.26	22.8	23.03	22.53	22.45	21.26	22.23	22.12	22.39	22.26	22.44	21.13	21.28	21.91	21.03	22.38	22.15	21.34	21.15	22.69	22.19	22.27	22.23	22.64	22.77	21.02	21.53	23.38	22	20.67	22.44	22.83	22.75	21.19	20.7	22.98	22.29	22.71	22.41	23.39	22.7	19.96
G6PD_HUMAN	P11413	Glucose-6-phosphate 1-dehydrogenase	4	0.231634	0.125762	0.833823	16.14	11.62	16.41	15.36	16.9	12.92	8.76	10.62	16.99	19.16	19.63	17.8	12.27	15.84	13.62	17.24	18.15	17.71	18.47	17.34	13.92	17.61	10.43	14.46	14.43	16.7	15.15	18.91	19.86	20.57	16.48	10.55	17.84	14.35	9.78	14.06	13.86	15.5	9.66	13.35	13.7	14.3	13.38
G6PI_HUMAN	P06744	Glucose-6-phosphate isomerase	14	0.200823	0.185911	0.848877	20.82	20.53	21.05	21.55	21.32	19.55	18.24	20.74	20.08	20.84	20.07	20.59	17.81	16.99	18.95	21.32	21.18	20.92	20.59	20.65	21.04	20.6	20.33	20.89	21.2	20.93	20.11	20.32	21.7	20.83	21.34	20.85	20.92	19.63	19.5	19.95	20.61	19.03	21.94	20.44	22.02	21.34	18.55
GBLP_HUMAN	P63244	Guanine nucleotide-binding protein subunit beta-2-like 1	4	0.158093	0.299634	0.866501	20.51	20.06	15.97	15.52	15.86	16.69	13.79	17.81	18.97	16.48	18.04	18.22	11.48	15.54	19.22	13.01	17.49	15.57	15.27	15.07	18.24	21.11	16.95	17.6	13.35	19.44	17.47	17.77	13.73	16.68	15.41	17.66	22.86	15.45	14.51	16.58	8.72	15.07	12.65	19.28	19.37	15.99	17.4
GBP6_HUMAN	Q6ZN66	Guanylate-binding protein 6	19	0.140563	0.357064	0.866501	20.82	20.4	17.74	17.5	20.7	14.79	17.54	18.94	17.75	20.24	20.55	18.86	19.12	15.17	20.55	17.13	17.39	19.66	17.03	17.64	20.06	20.15	18.76	17.24	17.34	20.78	19.92	20.59	16.56	17.58	18.45	18.98	19.32	20.41	20.19	18.35	14.92	16.11	16.13	20.84	20.81	20.31	19.18
GDIA_HUMAN	P31150	Rab GDP dissociation inhibitor alpha	4	0.308621	0.0391425	0.691001	19.55	19.18	19.45	18.85	19.25	17.96	16.05	18.94	19.05	19.94	19.1	19.18	14.36	14.6	16.63	16.78	17.49	19.18	19.2	16.41	19.86	19.83	18.71	18.87	19.43	18.56	15.73	19.9	19.55	20.21	17.44	18.64	19.66	20.15	15.9	17.25	18.15	19.02	19.1	17.64	21	18.93	17.07
GDIB_HUMAN	P50395	Rab GDP dissociation inhibitor beta	7	0.28724	0.0557256	0.692119	19.78	19.38	19.73	18.75	19.75	18.13	17.11	19.36	19.05	20.18	19.62	18.97	15.45	15.7	17.36	17.31	16.73	19.39	19.56	17.74	20.09	20.13	19.17	18.93	19.14	19.27	17.16	20.25	20.07	20.42	18.59	19.09	18.7	18.84	17	18.39	18.8	19.38	19.84	17.88	21.12	19.37	17.98
GDIR1_HUMAN	P52565	Rho GDP-dissociation inhibitor 1	2	0.112712	0.461016	0.871703	19.97	19.78	19.85	19.37	19.64	18.79	16.89	17.13	19.46	20.46	18.72	19.51	22.3	16.14	19.3	20.75	20.52	19.7	19.87	19.46	19.86	18.6	17.45	18.06	19.68	17.87	19.71	18.03	20.4	17.15	20.29	19.04	17.15	20.56	18.62	19.34	20.48	19.79	17.3	19.44	20.53	19.69	20.89
GDIR2_HUMAN	P52566	Rho GDP-dissociation inhibitor 2	4	0.121084	0.428172	0.871703	19.91	20.19	21.79	21.89	19.02	20.56	18.18	15.6	20.17	21.03	15.25	19.05	18.03	18.37	17.97	18.88	20.16	20.31	18.86	18.18	20.62	20.22	19.85	21.32	20.64	21.93	19.33	19.74	22.28	21.63	21.16	19.65	19.87	21.49	20.05	18.7	21.37	20.28	21.99	19.53	22.07	20.61	18.63
GELS_HUMAN	P06396	Gelsolin	11	0.237174	0.116714	0.810958	20.26	19.23	21.4	21.34	19.96	19.5	17.24	18.95	19.54	20.94	20.37	20.66	17.49	15.4	18.23	17.88	19.09	20.85	19.85	19.5	20.52	19.2	16.75	21.08	20.49	21.35	20	20.56	21.78	21.09	19.8	20.53	20.67	18.41	18.28	17.6	20.93	19.93	21.26	19.6	21.92	20.94	18.97
GFAP_HUMAN	Q96P18	Glial fibrillary acidic protein	3	-0.183921	0.226505	0.851194	20.83	20.85	22.63	22.65	20.17	20.87	21.67	22	21.85	23.71	21.79	22.53	19.26	17.62	21.07	23.51	23	22.91	20.25	21.43	22.56	21.38	15.88	19.07	17.61	22.61	17.84	19.32	19.9	22.73	22.2	21.12	21.81	21.27	21.34	21.25	18.64	19.51	21.49	22.64	22.66	22.54	20.03
GLNA_HUMAN	P15104	Glutamine synthetase	3	0.122618	0.422301	0.870123	20.52	20.25	16.35	17.71	16.51	18.58	14.38	17.28	15.59	18.19	16.69	16.92	14.62	15.38	17.7	15.67	18.48	20.37	18.07	20.34	18.67	17.75	19.72	15.33	19.49	19.29	15.6	20.74	15.45	15.39	17.87	19.89	18.48	17.05	18.08	15.68	15	15.5	14.6	16.02	19.64	17.71	20.17
GRP78_HUMAN	P11021	78 kDa glucose-regulated protein	13	0.235074	0.120083	0.810958	20.79	19.57	17.56	17.1	18.97	17.35	17.62	19.15	18.23	20.76	20.78	19.69	17.63	15.8	19.02	17.86	19.06	19.13	17.81	18.81	19.92	19.78	18.72	19.25	18.27	18.17	17.3	20.52	19.28	18.07	18.07	18.03	20.6	18.56	18.15	16.75	18.15	18.7	19.93	20.43	21.74	20.16	19.99
GSTP1_HUMAN	P09211	Glutathione S-transferase P	12	0.307386	0.0399752	0.691001	22.92	22.44	21.97	22.3	22.97	22.45	20.37	21.86	22.08	23.1	22.48	22.72	21.18	20.75	21.96	20.34	22.24	21.66	21.73	21.09	22.95	22.45	21.83	23.07	23.33	22.58	22.52	22.64	23.63	22.74	23.66	22.3	22.41	22.16	20.78	20.81	23.11	22.74	23.88	22.53	23.84	22.75	21.92
H11_HUMAN	Q02539	Histone H1.1	3	0.0884229	0.563534	0.898202	17.43	18.98	17.27	16.63	13.79	18.22	22.82	17.17	15.92	13.07	19.93	16.2	15.2	14.58	18.36	16.73	15.4	19.87	17.62	19.27	18.99	19.74	18.87	19.82	19.17	16.25	17.46	15.47	18.61	20.16	14.73	18.6	13.64	16.75	16.53	15.54	15.75	12.68	14.86	19.58	16.58	18.22	16.08
H12_HUMAN	P16403	Histone H1.2	6	0.00250049	0.986994	0.991089	16.96	19.5	17.94	11.83	12.85	19.58	15.49	15.05	12.7	12.7	16.64	15.95	15.35	15.11	16.09	12.64	15.31	16.77	15.98	17.88	16.26	17.91	13.78	20.41	19.92	17.39	18.02	17.73	15.67	16.89	13.74	17.36	13.55	18.42	18.07	16.94	15.82	16.21	18.34	17.54	18.61	16.96	16.1
H13_HUMAN	P16402	Histone H1.3	6	0.00250049	0.986994	0.991089	16.96	19.5	17.94	11.83	12.85	19.58	15.49	15.05	12.7	12.7	16.64	15.95	15.35	15.11	16.09	12.64	15.31	16.77	15.98	17.88	16.26	17.91	13.78	20.41	19.92	17.39	18.02	17.73	15.67	16.89	13.74	17.36	13.55	18.42	18.07	16.94	15.82	16.21	18.34	17.54	18.61	16.96	16.1
H14_HUMAN	P10412	Histone H1.4	6	0.00250049	0.986994	0.991089	16.96	19.5	17.94	11.83	12.85	19.58	15.49	15.05	12.7	12.7	16.64	15.95	15.35	15.11	16.09	12.64	15.31	16.77	15.98	17.88	16.26	17.91	13.78	20.41	19.92	17.39	18.02	17.73	15.67	16.89	13.74	17.36	13.55	18.42	18.07	16.94	15.82	16.21	18.34	17.54	18.61	16.96	16.1
H15_HUMAN	P16401	Histone H1.5	6	0.193744	0.20223	0.851194	18.27	15.35	17.1	17.85	13.07	16.66	18.44	15.25	17	13.96	17.19	16.09	15.4	12.83	18.63	16.18	17.43	15.7	17.01	16.32	15.09	18.03	17.76	19.7	19.31	16.94	18.59	18.11	19.51	19.92	15.51	17.13	15.7	17.09	17.26	15.89	16.78	15.58	17.58	15.24	17.77	18.18	17
H1T_HUMAN	P22492	Histone H1t	2	0.153734	0.313325	0.866501	16.67	22.41	17.39	17.91	14.39	17.51	27.12	16.73	14.62	16.69	20.32	15.22	16.54	14.85	17.93	15.48	14.01	20.62	17.3	19.46	19.45	20.2	18.82	20.24	19.58	14.31	16.91	14.87	20.97	21.17	17.04	18.3	11.18	15.78	15.75	14.03	14.01	12.11	15.39	19.94	16.14	18.17	15.29
H2A1A_HUMAN	Q96QV6	Histone H2A type 1-A	2	-0.179744	0.237412	0.851194	22.79	21.94	17.78	15.97	22.57	20.57	22.14	22.15	21.67	23.74	23.11	20.22	23.23	23.09	22.71	21.09	18.22	19.69	20.43	20.8	20.55	22.06	22	23.21	22.63	21.6	19.79	18.83	18.77	20.15	18.59	22.3	21.89	23.61	23.26	23.35	22.5	23.27	24.07	22.49	23.6	21.87	23.4
H2A1B_HUMAN	P04908	Histone H2A type 1-B/E	14	-0.16037	0.292638	0.866501	22.07	21.26	20.48	20.7	21.81	21.73	20.73	21.42	21.65	22.54	20.83	20.84	20.1	20.75	21.27	21.26	20.67	21.38	20.72	21.44	21.05	21.29	20.8	21.67	21.53	21.37	20.6	20.71	21.38	20.98	19.96	20.58	21.31	22.05	21.45	20.57	21.35	21.38	22.91	21.84	22.75	21.56	22.05
H2A1C_HUMAN	Q93077	Histone H2A type 1-C	15	-0.0385753	0.801364	0.96965	21.79	21.13	20.82	20.86	20.42	21.99	19.69	20.44	19.9	21.24	20.73	19.13	18.93	19.63	20.59	21.63	20.91	21.44	20.59	21.2	21.16	21.36	20.7	21.41	21.36	21.45	19.77	20.01	21.56	21.28	19.58	20.45	21.06	21.04	21.13	19.05	20.07	20.78	22.45	21.7	22.57	21.38	20.18
H2A1D_HUMAN	P20671	Histone H2A type 1-D	14	-0.112477	0.461957	0.871703	20.38	20.48	19.74	21.55	19.78	22.23	21.17	22.53	21.94	22.87	20.91	19.03	20.73	18.53	21.63	21.81	20.67	20.85	20.43	21.34	20.97	21.25	21.12	22.04	21.92	21.96	17.78	19.53	22.14	22.02	20.62	20.93	20.42	21.56	21.69	20.72	21.73	20.27	23.01	22.14	22.3	21.97	20.07
H2A1H_HUMAN	Q96KK5	Histone H2A type 1-H	15	-0.0583276	0.70351	0.948464	20.33	20.46	20.06	21.59	18.95	22.38	20.37	21.72	20.63	21.9	20.83	17.95	19.83	17.92	21.1	22.03	20.85	20.93	20.36	21.17	21.05	21.31	21.02	21.81	21.76	21.97	17.43	19.12	22.2	22.15	20.29	20.8	20.32	20.87	21.44	19.6	20.77	19.94	22.66	22.01	22.21	21.81	18.89
H2A1J_HUMAN	Q99878	Histone H2A type 1-J	15	-0.0583276	0.70351	0.948464	20.33	20.46	20.06	21.59	18.95	22.38	20.37	21.72	20.63	21.9	20.83	17.95	19.83	17.92	21.1	22.03	20.85	20.93	20.36	21.17	21.05	21.31	21.02	21.81	21.76	21.97	17.43	19.12	22.2	22.15	20.29	20.8	20.32	20.87	21.44	19.6	20.77	19.94	22.66	22.01	22.21	21.81	18.89
H2A1_HUMAN	P0C0S8	Histone H2A type 1	15	-0.0583276	0.70351	0.948464	20.33	20.46	20.06	21.59	18.95	22.38	20.37	21.72	20.63	21.9	20.83	17.95	19.83	17.92	21.1	22.03	20.85	20.93	20.36	21.17	21.05	21.31	21.02	21.81	21.76	21.97	17.43	19.12	22.2	22.15	20.29	20.8	20.32	20.87	21.44	19.6	20.77	19.94	22.66	22.01	22.21	21.81	18.89
H2A2A_HUMAN	Q6FI13	Histone H2A type 2-A	16	-0.087896	0.565869	0.898202	20.13	20.11	18.94	19.83	18.82	21.19	18.74	20.76	20.33	21.68	19.14	16.59	17.98	16.91	19.92	20.11	19.47	19.91	17.83	19.81	20	20.12	19.49	20.77	20.95	21.67	17.12	18.64	21.77	20.88	20.03	19.82	18.54	20.76	21.02	19.43	20.36	19.54	22.16	21.65	22.04	20.86	18.89
H2A2B_HUMAN	Q8IUE6	Histone H2A type 2-B	12	-0.0385753	0.801364	0.96965	21.79	21.13	20.82	20.86	20.42	21.99	19.69	20.44	19.9	21.24	20.73	19.13	18.93	19.63	20.59	21.63	20.91	21.44	20.59	21.2	21.16	21.36	20.7	21.41	21.36	21.45	19.77	20.01	21.56	21.28	19.58	20.45	21.06	21.04	21.13	19.05	20.07	20.78	22.45	21.7	22.57	21.38	20.18
H2A2C_HUMAN	Q16777	Histone H2A type 2-C	16	-0.087896	0.565869	0.898202	20.13	20.11	18.94	19.83	18.82	21.19	18.74	20.76	20.33	21.68	19.14	16.59	17.98	16.91	19.92	20.11	19.47	19.91	17.83	19.81	20	20.12	19.49	20.77	20.95	21.67	17.12	18.64	21.77	20.88	20.03	19.82	18.54	20.76	21.02	19.43	20.36	19.54	22.16	21.65	22.04	20.86	18.89
H2A3_HUMAN	Q7L7L0	Histone H2A type 3	14	-0.16037	0.292638	0.866501	22.07	21.26	20.48	20.7	21.81	21.73	20.73	21.42	21.65	22.54	20.83	20.84	20.1	20.75	21.27	21.26	20.67	21.38	20.72	21.44	21.05	21.29	20.8	21.67	21.53	21.37	20.6	20.71	21.38	20.98	19.96	20.58	21.31	22.05	21.45	20.57	21.35	21.38	22.91	21.84	22.75	21.56	22.05
H2AJ_HUMAN	Q9BTM1	Histone H2A.J	15	-0.0583276	0.70351	0.948464	20.33	20.46	20.06	21.59	18.95	22.38	20.37	21.72	20.63	21.9	20.83	17.95	19.83	17.92	21.1	22.03	20.85	20.93	20.36	21.17	21.05	21.31	21.02	21.81	21.76	21.97	17.43	19.12	22.2	22.15	20.29	20.8	20.32	20.87	21.44	19.6	20.77	19.94	22.66	22.01	22.21	21.81	18.89
H2AV_HUMAN	Q71UI9	Histone H2A.V	3	-0.0214571	0.888736	0.989513	17.3	20.13	18.35	18.96	17.07	21	14.24	22.53	17.06	15.94	14.44	16.02	16.87	17.23	19.18	17.87	15.99	19.87	18.66	18.74	18.5	15.97	19.16	20.3	20.82	19.57	19.77	21.03	21.04	20.91	19.83	17.55	18.27	18.03	18.54	16.35	20.62	19.84	20.37	16.33	21.96	12.3	20.44
H2AX_HUMAN	P16104	Histone H2A.x	11	-0.16037	0.292638	0.866501	22.07	21.26	20.48	20.7	21.81	21.73	20.73	21.42	21.65	22.54	20.83	20.84	20.1	20.75	21.27	21.26	20.67	21.38	20.72	21.44	21.05	21.29	20.8	21.67	21.53	21.37	20.6	20.71	21.38	20.98	19.96	20.58	21.31	22.05	21.45	20.57	21.35	21.38	22.91	21.84	22.75	21.56	22.05
H2AY_HUMAN	O75367	Core histone macro-H2A.1	9	-0.0996285	0.514953	0.894088	21.2	20.31	21.11	22.15	20.79	21.89	19.36	20.73	21.08	21.77	19.22	20.55	18.38	19.46	20.34	20.3	20.45	21.07	19.83	20.63	20.94	20.4	19.04	19.25	19.7	21.11	20.8	19.98	22.09	21.5	20.3	19.74	20.6	21.14	20.28	19.22	20.06	19.71	21.61	21.27	22.03	19.82	21.19
H2B1A_HUMAN	Q96A08	Histone H2B type 1-A	7	-0.153021	0.315602	0.866501	24.29	23.93	25.15	24.79	24.66	26.38	24.85	24.74	25.21	25.58	23.91	24.25	25.33	24.13	25.42	25.77	25.02	24.18	25.41	25.08	24.78	24.48	24.5	24.07	24.34	25.25	24.23	24.38	25.82	24.73	23.38	24.49	24.12	24.93	24.85	24.98	25.28	25.01	25.37	24.84	24.82	25.15	23.96
H2B1B_HUMAN	P33778	Histone H2B type 1-B	11	-0.125513	0.411345	0.866501	24.18	23.81	24.59	24.87	24.55	26.05	24.48	24.47	25.18	25.07	23.43	23.79	25.17	23.94	25.06	24.72	24.52	24.07	24.92	24.76	24.5	24.32	24.46	23.93	24.11	25	24.37	24.54	25.83	24.52	23.77	24.2	23.52	24.83	24.37	24.87	24.76	24.73	24.89	24.34	24.48	25.08	23.98
H2B1C_HUMAN	P62807	Histone H2B type 1-C/E/F/G/I	11	-0.125513	0.411345	0.866501	24.18	23.81	24.59	24.87	24.55	26.05	24.48	24.47	25.18	25.07	23.43	23.79	25.17	23.94	25.06	24.72	24.52	24.07	24.92	24.76	24.5	24.32	24.46	23.93	24.11	25	24.37	24.54	25.83	24.52	23.77	24.2	23.52	24.83	24.37	24.87	24.76	24.73	24.89	24.34	24.48	25.08	23.98
H2B1D_HUMAN	P58876	Histone H2B type 1-D	11	-0.125513	0.411345	0.866501	24.18	23.81	24.59	24.87	24.55	26.05	24.48	24.47	25.18	25.07	23.43	23.79	25.17	23.94	25.06	24.72	24.52	24.07	24.92	24.76	24.5	24.32	24.46	23.93	24.11	25	24.37	24.54	25.83	24.52	23.77	24.2	23.52	24.83	24.37	24.87	24.76	24.73	24.89	24.34	24.48	25.08	23.98
H2B1H_HUMAN	Q93079	Histone H2B type 1-H	11	-0.125513	0.411345	0.866501	24.18	23.81	24.59	24.87	24.55	26.05	24.48	24.47	25.18	25.07	23.43	23.79	25.17	23.94	25.06	24.72	24.52	24.07	24.92	24.76	24.5	24.32	24.46	23.93	24.11	25	24.37	24.54	25.83	24.52	23.77	24.2	23.52	24.83	24.37	24.87	24.76	24.73	24.89	24.34	24.48	25.08	23.98
H2B1J_HUMAN	P06899	Histone H2B type 1-J	10	-0.125513	0.411345	0.866501	24.18	23.81	24.59	24.87	24.55	26.05	24.48	24.47	25.18	25.07	23.43	23.79	25.17	23.94	25.06	24.72	24.52	24.07	24.92	24.76	24.5	24.32	24.46	23.93	24.11	25	24.37	24.54	25.83	24.52	23.77	24.2	23.52	24.83	24.37	24.87	24.76	24.73	24.89	24.34	24.48	25.08	23.98
H2B1K_HUMAN	O60814	Histone H2B type 1-K	10	-0.125513	0.411345	0.866501	24.18	23.81	24.59	24.87	24.55	26.05	24.48	24.47	25.18	25.07	23.43	23.79	25.17	23.94	25.06	24.72	24.52	24.07	24.92	24.76	24.5	24.32	24.46	23.93	24.11	25	24.37	24.54	25.83	24.52	23.77	24.2	23.52	24.83	24.37	24.87	24.76	24.73	24.89	24.34	24.48	25.08	23.98
H2B1L_HUMAN	Q99880	Histone H2B type 1-L	11	-0.125513	0.411345	0.866501	24.18	23.81	24.59	24.87	24.55	26.05	24.48	24.47	25.18	25.07	23.43	23.79	25.17	23.94	25.06	24.72	24.52	24.07	24.92	24.76	24.5	24.32	24.46	23.93	24.11	25	24.37	24.54	25.83	24.52	23.77	24.2	23.52	24.83	24.37	24.87	24.76	24.73	24.89	24.34	24.48	25.08	23.98
H2B1M_HUMAN	Q99879	Histone H2B type 1-M	11	-0.125513	0.411345	0.866501	24.18	23.81	24.59	24.87	24.55	26.05	24.48	24.47	25.18	25.07	23.43	23.79	25.17	23.94	25.06	24.72	24.52	24.07	24.92	24.76	24.5	24.32	24.46	23.93	24.11	25	24.37	24.54	25.83	24.52	23.77	24.2	23.52	24.83	24.37	24.87	24.76	24.73	24.89	24.34	24.48	25.08	23.98
H2B1N_HUMAN	Q99877	Histone H2B type 1-N	11	-0.125513	0.411345	0.866501	24.18	23.81	24.59	24.87	24.55	26.05	24.48	24.47	25.18	25.07	23.43	23.79	25.17	23.94	25.06	24.72	24.52	24.07	24.92	24.76	24.5	24.32	24.46	23.93	24.11	25	24.37	24.54	25.83	24.52	23.77	24.2	23.52	24.83	24.37	24.87	24.76	24.73	24.89	24.34	24.48	25.08	23.98
H2B1O_HUMAN	P23527	Histone H2B type 1-O	11	-0.125513	0.411345	0.866501	24.18	23.81	24.59	24.87	24.55	26.05	24.48	24.47	25.18	25.07	23.43	23.79	25.17	23.94	25.06	24.72	24.52	24.07	24.92	24.76	24.5	24.32	24.46	23.93	24.11	25	24.37	24.54	25.83	24.52	23.77	24.2	23.52	24.83	24.37	24.87	24.76	24.73	24.89	24.34	24.48	25.08	23.98
H2B2E_HUMAN	Q16778	Histone H2B type 2-E	11	-0.125513	0.411345	0.866501	24.18	23.81	24.59	24.87	24.55	26.05	24.48	24.47	25.18	25.07	23.43	23.79	25.17	23.94	25.06	24.72	24.52	24.07	24.92	24.76	24.5	24.32	24.46	23.93	24.11	25	24.37	24.54	25.83	24.52	23.77	24.2	23.52	24.83	24.37	24.87	24.76	24.73	24.89	24.34	24.48	25.08	23.98
H2B2F_HUMAN	Q5QNW6	Histone H2B type 2-F	11	-0.125513	0.411345	0.866501	24.18	23.81	24.59	24.87	24.55	26.05	24.48	24.47	25.18	25.07	23.43	23.79	25.17	23.94	25.06	24.72	24.52	24.07	24.92	24.76	24.5	24.32	24.46	23.93	24.11	25	24.37	24.54	25.83	24.52	23.77	24.2	23.52	24.83	24.37	24.87	24.76	24.73	24.89	24.34	24.48	25.08	23.98
H2B3B_HUMAN	Q8N257	Histone H2B type 3-B	11	-0.125513	0.411345	0.866501	24.18	23.81	24.59	24.87	24.55	26.05	24.48	24.47	25.18	25.07	23.43	23.79	25.17	23.94	25.06	24.72	24.52	24.07	24.92	24.76	24.5	24.32	24.46	23.93	24.11	25	24.37	24.54	25.83	24.52	23.77	24.2	23.52	24.83	24.37	24.87	24.76	24.73	24.89	24.34	24.48	25.08	23.98
H2BFS_HUMAN	P57053	Histone H2B type F-S	10	-0.125513	0.411345	0.866501	24.18	23.81	24.59	24.87	24.55	26.05	24.48	24.47	25.18	25.07	23.43	23.79	25.17	23.94	25.06	24.72	24.52	24.07	24.92	24.76	24.5	24.32	24.46	23.93	24.11	25	24.37	24.54	25.83	24.52	23.77	24.2	23.52	24.83	24.37	24.87	24.76	24.73	24.89	24.34	24.48	25.08	23.98
H33_HUMAN	P84243	Histone H3.3	2	0.0968879	0.526638	0.89638	17.17	19.88	16.97	12.86	14.39	21.44	19.03	19.47	20.79	22.49	20.77	19.94	19.65	17.75	18.82	19.58	16.13	21.66	15.58	14.8	15.49	20	19.19	20.91	20.66	22.02	17.72	27.13	21.79	22.19	18.63	19.85	19.19	21.6	21.11	18.74	21.47	18.28	13.61	21.49	18.89	18.06	17.76
H4_HUMAN	P62805	Histone H4	12	0.0252949	0.868995	0.984439	22.85	22.35	20.53	21.3	22.31	24.06	20.1	21.88	21.92	22.59	21.88	21.28	20.98	21.53	22.44	18.9	18.84	21.11	19.5	20.55	22.28	22.47	21.89	22.45	22.19	23.36	20.87	21.97	21.98	22.21	20.43	21.94	21.84	22.6	22.11	21.14	22.69	21.26	24.17	22.63	23.35	22.6	21.96
H90B2_HUMAN	Q58FF8	Putative heat shock protein HSP 90-beta 2	6	0.148108	0.331573	0.866501	21.77	21.34	17.17	16.6	20.65	17.88	18.67	21.03	17.02	21.4	21.17	18.2	20	20.53	21.05	18.93	20.62	19.27	16.94	18.18	20.61	20.31	20.88	20.54	20.82	20.93	18.43	20.66	18.42	20.41	20.75	20.65	21.47	21.6	20.66	20.25	18.37	19.18	16.65	20.37	20.94	19	20.55
H90B3_HUMAN	Q58FF7	Putative heat shock protein HSP 90-beta-3	6	0.0695294	0.649943	0.948464	20.07	20.22	13.31	10.93	18.14	15.52	12.78	17.51	16.96	19.74	18.9	16.42	18.12	13.78	18.5	16.15	19.31	17	15.18	17.93	19.66	18.53	19.74	15.86	18.52	17.57	15.62	17.86	17.98	20.51	19.4	19.6	20.36	19.66	16.89	16.28	16.18	15.29	15.46	19.88	17.39	17.42	15.26
H90B4_HUMAN	Q58FF6	Putative heat shock protein HSP 90-beta 4	3	0.131725	0.388392	0.866501	20.74	20.07	15.64	9.86	19.09	16.95	15.48	17.63	14.36	20.8	20.57	11.5	17.26	15.49	20.05	13.69	19.34	12.88	12.63	14.67	20.64	21.52	19.73	16.06	17.44	20.18	14.04	15.17	16.41	19.56	18.88	19.76	20.5	20.79	19.36	18.55	13.84	18.23	16.68	20.28	15.67	14.66	11.73
HBAZ_HUMAN	P02008	Hemoglobin subunit zeta	2	0.277788	0.0646644	0.72785	22.31	23.42	25.16	21.61	12.98	13.39	13.63	13.01	20.2	17.44	19.42	12.82	12.79	12.46	16.13	9.82	23.26	24.22	24.94	22.84	27.71	21.61	13.97	27.31	24.56	16.31	24.92	21.75	20.5	16.17	11.36	19.67	13.83	10.36	23.31	10.48	20.92	19.49	23.35	23.71	14.12	21.27	6.71
HBA_HUMAN	P69905	Hemoglobin subunit alpha	14	0.197222	0.194089	0.851194	21.87	23.39	25.95	22.77	14.78	16.09	15.75	11.25	18.86	14.94	20.22	11.9	9.29	11.81	11.72	21.03	24.92	25.2	25.45	24.62	27.7	18.82	19.12	27.13	23.09	18.51	22.57	20.03	20.99	22.69	16.61	20.67	18.02	10.73	22.95	20.74	19.82	18.73	21.75	23.34	15.64	22.66	11.33
HBB_HUMAN	Q549N7	Hemoglobin subunit beta	12	0.290757	0.0526641	0.692119	21.88	23.47	26.16	23.08	16.19	20.38	19.65	16.4	21.2	18.08	20.68	16.47	16.54	12.2	18.01	22.92	24.14	23.88	22.11	23.77	26.83	23.29	21.99	26.2	24.98	21.81	21.48	22.76	22.1	22.43	18.67	22.3	21.77	14.36	23.65	23.18	22.46	20.89	23.52	24.38	15.03	23.62	16.65
HBD_HUMAN	P02042	Hemoglobin subunit delta	7	0.355631	0.0165088	0.691001	20.64	22.42	25.88	22.8	15.39	20.29	17.95	13.34	19.96	19.7	19.38	15.57	17.89	9.82	15.03	22.48	23.09	22.08	18.99	22.22	25.24	22.85	21.44	24.63	24.62	21.23	18.22	21.88	21.6	21.03	17.31	21.67	20.92	13.51	21.91	22.3	21.93	20.13	23.07	23.95	12.54	22.84	17.28
HEMO_HUMAN	P02790	Hemopexin	3	0.0274863	0.857758	0.984439	17.63	21.35	22.43	21.87	12.59	22.11	19.16	10.65	9.37	16.62	9.31	15.43	15.96	13.21	12.12	26.94	21.44	21.91	18.33	19.12	19.58	14.85	16.19	20.21	20.93	20.75	22.02	18.39	20.39	21.39	19.68	20.15	17.91	15.42	9.82	13.32	11.41	14.11	19.49	13.72	19.37	16.13	19.94
HIS1_HUMAN	P15515	Histatin-1	7	0.0955622	0.532337	0.898202	22.21	24.51	18.15	22.93	16.77	18.8	23.49	23.88	19.46	16.61	16.91	18.36	22.93	21.55	23.82	18.43	16.46	19.78	14.76	14.64	21.21	23.4	21.92	22.3	21.25	21.44	24.03	19.67	20.51	20.01	19.22	22.95	21.48	23.14	22.95	22.66	24.24	24.16	17.79	18.55	14.54	20.11	24.72
HPTR_HUMAN	P00739	Haptoglobin-related protein	4	-0.0634886	0.678634	0.948464	21.67	21.07	21.98	22.12	15.99	19.5	18.52	20.28	15.28	16	17.95	12.74	18.08	16.91	16.11	23.15	22.04	21.98	21.28	21.38	19.74	19	20.88	18.34	21.13	21.9	22.37	20.39	20.94	22.45	19.55	21.57	21.86	15.52	18.26	16.02	20.25	18.4	21.02	20.36	21.85	20.95	19.44
HPT_HUMAN	P00738	Haptoglobin	10	-0.00288403	0.984999	0.991089	21.69	20.66	22.04	21.62	17.69	17.94	17.68	17.39	16.04	17.13	17.36	14.6	16.97	17.35	17.7	22.93	21.12	21.75	22.51	22.09	19.83	18.16	21.18	19.97	21.16	20.24	22.67	20.57	20.61	21.93	20.02	21.45	21.36	16.06	18.07	17.03	20.08	18.51	21.06	20	19.87	20.23	18.32
HS71L_HUMAN	P34931	Heat shock 70 kDa protein 1-like	9	0.208566	0.169161	0.848877	22.76	22.1	21.09	19.31	20.16	22.41	20.16	21.85	24.04	22.9	22.69	22.66	21.85	20.5	22.17	20.67	20.33	20.55	22.3	22.36	22.31	20.75	22.3	22.08	20.38	22.33	18.5	22.47	22.94	20.06	22.25	20	22.02	20.08	19.06	19.48	22.34	22.2	21.18	19.92	20.84	19.98	24.53
HS902_HUMAN	Q14568	Putative heat shock protein HSP 90-alpha A2	6	0.1771	0.244496	0.851194	21.83	21.56	16.72	18.94	19.83	18.23	16.46	20.51	19.96	20.47	21.11	19.84	17.9	17.49	20.87	20.62	20.91	19.43	19.2	20.34	20.68	20.56	21.21	20.44	19.46	21.04	19.99	21.55	20.53	21.65	21.38	20.75	21.15	21.44	20.93	20.7	19.83	19.45	17.11	20.74	21.48	18.29	20.88
HS904_HUMAN	Q58FG1	Putative heat shock protein HSP 90-alpha A4	2	0.202301	0.182626	0.848877	21.23	21.17	15.96	18.77	18	16.73	14.77	19.95	19.35	19.32	20.71	19.79	15.56	14.75	20.21	20.03	20.41	16.97	19.94	20.6	20.88	21.47	20.74	19.75	17.85	20.7	20.19	21.07	19.88	21.58	21.21	20.27	20.74	21.12	20.65	20.32	18.71	18.6	14.68	21.59	21.56	17.69	20.08
HS90A_HUMAN	P07900	Heat shock protein HSP 90-alpha	13	0.128491	0.400243	0.866501	20.1	20.41	15.86	17.05	19.81	16.73	16.24	18.39	19.46	18.82	20.75	16.24	17.11	16.41	18.19	17.33	19.18	17.73	17.77	18.33	19.66	20	20.43	18.29	17.36	20.38	18.68	19.43	19.9	19.76	19.61	19.35	20.26	20.86	18.52	18.65	17.72	18.08	17.84	19.64	19.01	17.61	18.4
HS90B_HUMAN	P08238	Heat shock protein HSP 90-beta	15	0.068709	0.653811	0.948464	20.5	20.49	14.63	15.24	19.18	15.63	14.07	19.5	18.43	20.52	20.25	17.08	18.26	15.92	19.62	17.61	19.56	19.66	15.83	18.7	19.31	20.01	20.31	18.1	17.31	18.9	17.04	19.27	16.6	20.18	20.06	20.09	20.03	19.13	18.81	17.55	15.8	15.99	16.7	20.07	19.39	18.47	18.15
HSP71_HUMAN	P08107	Heat shock 70 kDa protein 1A/1B	20	0.292413	0.0512706	0.692119	20.21	19.23	19.6	18.68	19.34	19.24	15.89	18.08	18.5	20.31	20.43	18.95	16.9	15.35	19.02	17.43	19.73	19.13	18.29	18.85	19.26	20.9	19.58	18.07	19.93	19.85	18.15	19.16	20.73	18.81	19.48	18.58	20.3	18.97	16.71	16.9	17.43	18.12	19.6	19.59	21.5	18.33	19
HSP72_HUMAN	P54652	Heat shock-related 70 kDa protein 2	11	0.312836	0.036407	0.691001	21.18	20.91	18.8	17.34	19.73	19.65	18.28	19.3	19.38	21.28	21.37	20.56	17.24	17.63	20.5	20.16	19.63	19.75	19.69	19.57	21.34	19.66	20.72	20.88	20.02	20.7	17.94	20.04	21.03	19.82	18.3	19.97	21	18.23	19.39	18.28	18.91	19.83	19.87	20.08	20.9	19.74	21.18
HSP76_HUMAN	P17066	Heat shock 70 kDa protein 6	7	0.165989	0.27583	0.866501	20.39	20.62	19.05	18.03	20.64	20.7	20.06	21.01	19.25	21.94	21.05	21.43	17.7	15.95	21.02	19.48	19.96	18.22	18	18.95	21.54	22.07	20.97	20.4	20.95	21.56	20.03	19.94	21.25	20.42	19.46	20.72	21.08	21.97	22.06	20.15	20.15	20.4	21.17	21.72	22.23	20.58	20.42
HSP7C_HUMAN	P11142	Heat shock cognate 71 kDa protein	24	0.324003	0.0299113	0.691001	20.14	19.91	18	17.5	18.81	18.68	17.15	18.03	19.16	20.98	21.05	19.28	16.66	16.67	20.15	19.19	19.11	19.8	18.45	18.89	20.19	20.26	19.87	19.53	19.78	20.19	17.74	19.74	19.72	19.66	18.2	19.73	20.63	17.98	18.71	18.49	18.93	19.5	19.78	19.96	20.43	19.73	19.78
HSPB1_HUMAN	Q9UC36	Heat shock protein beta-1	23	0.239163	0.113588	0.810958	23.23	23.26	22.67	21.12	23.3	23.14	23	22.63	22.73	24.36	23.6	23.2	22.52	22.22	23.46	23.3	23.12	23.16	22.31	22.59	23.73	24.01	23.58	23.48	23.74	23.5	22.54	22.74	22.64	23.48	23.19	23.31	23.42	22.71	23.3	22.87	23.23	23.62	23.21	23.53	23.57	23.44	22.86
HV305_HUMAN	P01766	Ig heavy chain V-III region BRO	2	0.0531349	0.728851	0.953071	22.79	22.18	22.41	22.6	19.65	22.11	19.1	22.04	22.47	23.85	23.52	23.98	23.48	21.18	22.6	22.86	22.43	22.54	22.23	22.11	19.49	20.88	22.84	23.23	23.32	20.63	22.73	21.44	22.03	23.15	22.79	22.7	22.83	22.17	23.23	21.35	23.13	22.79	23.57	23.11	24.05	22.82	20.79
HV316_HUMAN	P01777	Ig heavy chain V-III region TEI	2	0.0531349	0.728851	0.953071	22.79	22.18	22.41	22.6	19.65	22.11	19.1	22.04	22.47	23.85	23.52	23.98	23.48	21.18	22.6	22.86	22.43	22.54	22.23	22.11	19.49	20.88	22.84	23.23	23.32	20.63	22.73	21.44	22.03	23.15	22.79	22.7	22.83	22.17	23.23	21.35	23.13	22.79	23.57	23.11	24.05	22.82	20.79
HV320_HUMAN	P01781	Ig heavy chain V-III region GAL	2	0.246588	0.102482	0.792107	21.88	21.27	21.14	21.94	21.44	17.23	17.02	20.97	19.56	20.79	22.6	23.08	21.81	21.93	21.55	21.13	18.87	20.66	21.38	21.46	20.53	19.96	21.26	21.66	22.15	20.18	21.32	20.87	21.11	22.15	20.66	21.74	22.19	20.61	20.55	20.47	21.98	19.27	21.88	21.67	22.4	21.94	21.25
IDHP_HUMAN	P48735	Isocitrate dehydrogenase [NADP], mitochondrial	2	-0.128486	0.400262	0.866501	13.7	13.54	12.42	13.84	15.3	11.99	10.9	15.58	10.99	20.09	19.55	8.78	14.3	13.59	14.07	15.11	9.37	12.77	20.43	17.76	14.02	16.04	10.58	9.65	13.44	11.8	19.58	19.98	20.1	20.76	15.23	15.55	19.53	16.84	11.73	14.97	16.62	15.4	16.83	17.13	20.48	18.45	13.62
IF4A1_HUMAN	P60842	Eukaryotic initiation factor 4A-I	7	-0.0126416	0.934313	0.989513	20.66	19.53	15.39	13.62	19.42	13.95	15.76	17.62	17.86	18.64	20.4	14.06	16.04	17.85	16.17	17.31	18.51	18.55	20.19	19.47	20.06	20.51	18.6	13.01	12.73	19.35	15.4	19.91	16.79	19.75	14.95	18.49	20.45	16.69	15.87	14.43	15.68	13.62	12.29	19.33	14.91	19.13	16.68
IF4A2_HUMAN	Q14240	Eukaryotic initiation factor 4A-II	4	-0.0365954	0.811368	0.972591	21.46	20.41	16.16	14.68	19.81	13.92	16.06	18	17.48	20.98	20.92	14.41	15.82	22.47	17.47	15.93	17.93	17.65	22.3	19.56	20.62	21.18	19.79	14.48	13.99	19.46	15.05	20.25	15.25	19.27	18.21	19.66	20.78	18.03	16.12	13.93	16.71	15.52	14.77	20.21	16.3	19.48	19.98
IGHA1_HUMAN	P01876	Ig alpha-1 chain C region	16	0.135586	0.374511	0.866501	26.83	26.08	26.43	27.37	27.15	26.81	26.49	26.75	27	26.94	26.62	27.86	26.85	26.29	26.5	27.32	26.92	26.79	26.52	26.86	26.03	26.21	26.82	27.34	27	25.85	25.08	25.68	26.48	25.11	25.64	26.16	26.76	25.88	26.19	25.81	26.92	26.22	27.39	26.26	27.23	26.55	26.33
IGHA2_HUMAN	P01877	Ig alpha-2 chain C region	13	0.163457	0.283325	0.866501	26.49	25.7	26.05	27.06	26.93	26.54	26.13	26.45	26.68	26.6	26.35	27.72	26.52	25.99	26.22	26.81	26.49	26.36	26.02	26.39	25.79	25.92	26.53	27.13	26.78	25.39	24.6	25.26	26.07	24.35	25.46	25.79	26.43	25.47	25.75	25.36	26.59	25.8	27.24	25.88	26.99	26.21	25.84
IGHG1_HUMAN	P01857	Ig gamma-1 chain C region	16	-0.00848913	0.955863	0.990093	24.12	24.51	24.91	24.8	23.99	23.89	23.7	23.08	24.53	24.42	24.08	23.62	22.95	23.07	23.03	25.94	24.75	24.91	24.27	23.85	24.87	24.3	24.28	24.71	24.87	23.78	24.02	24.6	23.53	23.62	23.05	25.02	24.42	25.31	24.6	24.39	24.54	24.13	24.41	25.01	25.47	25.32	22.36
IGHG2_HUMAN	P01859	Ig gamma-2 chain C region	12	0.0916745	0.54922	0.898202	22.3	21.12	23.48	23.28	21.88	22.25	19.31	19.16	22.74	22.09	22.66	22.32	21.22	21.4	22.03	23.64	23.48	23.67	23.47	23.53	23.39	22.64	22.5	23.41	23.52	22.83	22.27	21.45	22.78	23.58	21.28	23.52	23.1	20.72	23.17	18.11	20.45	20.99	24.47	23.71	22.51	23.45	22.49
IGHG3_HUMAN	P01860	Ig gamma-3 chain C region	13	0.134583	0.378089	0.866501	23.33	23.73	24.21	24.22	22.92	22.74	19.88	21.62	23.07	22.61	23.26	22.76	21.31	21.79	22.15	25.75	23.89	24.26	23.17	22.78	23.85	23.14	23.24	23.88	24.16	23.19	22.77	23.73	23.04	22.65	21.76	24.22	23.88	22.29	23.27	21.91	21.31	21.92	24.52	24	22.98	24.22	22.77
IGHG4_HUMAN	P01861	Ig gamma-4 chain C region	14	0.00356954	0.981434	0.991089	23.4	23.83	24.38	24.4	23.04	23.21	22.75	21.84	23.95	21.84	23.03	22.06	21.37	21.95	21.83	25.67	24.22	24.64	23.18	22.73	24.14	23.51	23.46	24.05	24.18	22.92	23.12	24.02	22.95	22.48	21.71	24.03	23.47	23.95	23.56	21.94	20.52	22.37	23.75	24.14	24.75	24.42	20.88
IGHM_HUMAN	P01871	Ig mu chain C region	7	-0.0418355	0.784959	0.964264	21.54	22.02	22.15	18.87	19.28	16.22	18.1	19.97	19	19.07	21.78	21.71	19.06	21.43	21.39	19.3	20.12	21.33	20.23	18.39	14.24	17.53	16.03	19.9	20.93	22.42	23.55	23.04	22.41	21.55	19.95	21.06	21.57	18.78	20.08	18.13	20.59	17.86	20.87	21.91	23.03	21.52	21.66
IGKC_HUMAN	P01834	Ig kappa chain C region	6	0.237047	0.116916	0.810958	26.31	26.14	26.04	26.2	26.42	25.2	25.77	26.11	26.3	26.33	25.94	26.67	26.42	25.83	25.98	26.62	26.45	26.39	25.48	25.57	25.87	25.57	26.74	26.37	26.53	25.65	25.55	24.93	25.64	26.07	24.92	26.17	25.94	25.98	25.78	25.75	26.08	25.58	26.48	25.62	26.63	24.06	26.45
IL1F6_HUMAN	Q9UHA7	Interleukin-1 family member 6	3	0.030058	0.844606	0.980951	20.87	20.84	19.41	13.75	20.54	13.95	18.77	20.21	19.54	17.59	19.98	17.6	16.4	20.51	21.56	19.77	21.05	20.87	20.29	20.85	20.37	19.97	18.72	20.89	21.03	20.92	19.81	21.14	20.83	20.75	21.35	20.91	21.39	20.72	21.27	20.43	20.8	20.67	15.69	20.08	20.31	18.26	20.25
IL1RA_HUMAN	P18510	Interleukin-1 receptor antagonist protein	5	0.106626	0.48572	0.883791	19.64	20.19	18.25	17.95	20.23	20.64	21.1	17.93	16.38	23.95	21.39	21.35	17.73	19.34	19.78	19.83	18.92	21.7	19.63	20.74	19.9	18.71	20.26	21.09	20.02	19.89	19.57	20.17	21.67	21.02	19.08	19.91	21.26	19.64	17.94	19.42	19.91	19.56	21.5	21.66	22.63	20.03	18.62
ILEU_HUMAN	P30740	Leukocyte elastase inhibitor	17	0.0211247	0.890449	0.989513	20.09	19.75	19.69	21.11	20.22	20.5	17.57	20.05	20.03	21.87	20.97	20.72	19.32	17.94	19.47	19.47	20.26	20.27	21.62	21.38	20.41	19.76	20.04	19.78	20.17	21.43	21.51	21.13	21.54	21.69	20.56	19.43	20.26	21.68	20.13	20.29	21.31	21.03	21.48	20.25	21.99	21.53	21.75
INVO_HUMAN	P07476	Involucrin	17	-0.186759	0.219294	0.851194	21.11	21.38	17.81	17.66	21.02	17.49	18.88	20.08	20.04	20.91	21.81	21.2	19.46	17.41	21.45	21.84	20.9	20.13	20.51	20.7	19.31	19.97	20.69	16.84	18.17	20.78	20.43	20.94	18.31	20.77	20.96	21.09	20.99	21.17	20.82	19.95	20.51	20.34	19.6	21.12	20.05	20.49	20.63
IQGA1_HUMAN	P46940	Ras GTPase-activating-like protein IQGAP1	9	-0.0392381	0.798021	0.96965	14.37	15.35	11.15	13.2	15.3	13.97	14.94	14.61	13.42	18.07	17.56	12.35	15.06	12.12	13.51	16.86	17.25	18.12	14.62	15.32	19.42	16.68	14.69	12.97	12.37	16.98	14.91	17.95	13.68	15.93	14.9	13.59	14.44	15.21	14.84	13.93	10.87	13.52	12.8	17	15.61	17.17	15.67
ISK5_HUMAN	Q9NQ38	Serine protease inhibitor Kazal-type 5	4	0.201234	0.184994	0.848877	13.16	11.67	10.89	13.82	13.96	8.18	11.22	14.74	17.37	14.31	19.45	13.81	13.42	13.32	14.75	13.28	19.42	15.09	13.7	12.83	16.36	17.12	16.38	19.34	14.59	13.1	10.74	15.07	11.18	14.93	11.31	12.13	17.86	13.89	18.87	17.59	17.14	17.85	18.4	16.13	17.3	12.25	10.35
K1C10_HUMAN	P13645	Keratin, type I cytoskeletal 10	27	0.00764108	0.960269	0.990093	23.27	23.29	21.8	21.75	23.12	22.33	22.96	23.98	23.07	23.64	24.68	24.81	22.65	24.01	22.6	25.04	23.77	23.55	22.96	23.13	23.65	23.25	23.92	22.88	23.05	23.64	23.73	22.42	20.08	23.35	23.06	24.08	24.64	24	22.79	23.31	22.35	22.05	20.99	22.98	21.65	22.08	22.27
K1C12_HUMAN	Q99456	Keratin, type I cytoskeletal 12	5	0.138698	0.363544	0.866501	25.18	25.5	25.07	25.25	25.1	24.54	25.31	24.58	24.68	25.02	25.08	25.22	25.26	24.84	24.63	25.45	26.09	26.01	24.54	24.89	25.86	25.42	25.69	24.52	24.67	25.25	25.79	23.19	24.06	23.91	22.34	24.89	24.79	25.64	23.72	25.25	24.53	24.12	24.31	23.99	23.29	24.85	25.22
K1C13_HUMAN	P13646	Keratin, type I cytoskeletal 13	59	-0.0139096	0.927741	0.989513	26.46	26.46	26.06	25.97	26.51	25.5	26.14	25.6	25.61	26.36	26.47	26.3	26.48	26.23	26.09	27.38	26.76	26.81	25.98	25.78	26.54	26.31	26.38	25.36	25.41	26.49	25.95	25.86	24.86	26.3	25.58	25.8	25.74	26.54	25.76	26.17	25.24	25.03	25.06	25.87	25.22	25.99	26.11
K1C14_HUMAN	P02533	Keratin, type I cytoskeletal 14	45	0.0632214	0.679914	0.948464	24.58	24.93	23.44	23.46	23.48	23.5	24.84	24.47	23.58	24.01	24.29	24.6	23.85	24.59	24.2	25.51	25.4	25.22	23.55	23.63	25.01	25.71	25.64	24.32	24.07	24.77	23.79	23.07	21.6	24.11	23.72	25.03	25.08	25.07	24.15	25.19	23.87	22.82	21.71	24.35	23.15	23.23	23.58
K1C15_HUMAN	P19012	Keratin, type I cytoskeletal 15	19	0.0360068	0.814348	0.972591	24.56	24.91	23.95	23.97	25.04	23.23	24.24	24.21	24.49	25.11	25.56	25.61	24.25	23.59	24.17	25.23	25.79	25.18	24.77	25.13	24.99	25.45	24.48	23.73	24.13	24.75	25.2	24.14	22.73	25.14	24.27	24.6	25.89	25.74	24.13	25.36	24.07	23.53	23.3	24.9	24.21	24.39	24.49
K1C16_HUMAN	P08779	Keratin, type I cytoskeletal 16	50	0.0266033	0.862283	0.984439	24.85	25.41	24.3	23.98	24.32	23.98	25.51	25.18	24.31	24.29	24.9	25.55	25.21	25.37	24.88	26.08	25.81	25.31	24.11	24.28	25.36	25.55	24.85	24.34	23.91	25.45	23.6	23.46	22.06	24.5	24.05	25.08	25.57	25.27	24.73	24.96	24.21	23.5	21.72	24.76	23.71	23.57	23.64
K1C17_HUMAN	Q8N1P6	Keratin, type I cytoskeletal 17	30	-0.108741	0.477059	0.877933	23.48	24.12	19.63	20.14	22.68	21.82	23.5	22.68	21.57	22.24	23.01	22.3	21.1	21.18	22.75	23.82	24.36	23.8	22.47	23.24	23.72	24.39	24.1	21.77	22.67	23.26	22.08	21.56	18.53	22.57	22.76	24.04	24.09	23.97	21.65	23.43	21.39	20.4	20.13	23.23	21.86	21.79	21.33
K1C18_HUMAN	P05783	Keratin, type I cytoskeletal 18	2	0.133434	0.382211	0.866501	16.29	12.57	10.28	17.8	19.32	11.22	15.49	18.01	16.39	15.95	19.64	13.83	19.02	9.2	14.85	20.56	16.05	19.54	18.58	19.22	16.94	19.37	16.14	18.09	18.44	24.35	19.65	20.27	11.04	21.52	12.64	15.15	19.16	16.9	18.58	15.69	18.92	18.64	6.58	19.16	16.25	18.91	15.82
K1C19_HUMAN	Q9P1Y4	Keratin, type I cytoskeletal 19	16	-0.150687	0.323128	0.866501	22.25	20.15	19.23	19.03	21.83	19.7	19.92	20.87	21.23	23	22.79	21	20.37	19.88	21.9	23.7	23.08	21.77	19.47	21.46	20.89	21.94	21.97	20.82	19.93	21.85	22.2	21.46	18.3	23.81	21.17	21.2	22.37	23.1	22.41	21	20.31	21.1	19.52	21.92	21.17	21.81	21.63
K1C20_HUMAN	P35900	Keratin, type I cytoskeletal 20	5	0.0320534	0.83443	0.977879	25.59	26.22	26.31	26.23	25.48	25.88	27	26.52	26.49	27.01	27	27.11	27.17	27.06	26.51	27.82	27.39	27.42	24.73	24.64	27.49	27.71	27.27	26.16	26.08	27.2	25.97	23.42	25.2	26.79	26.68	26.84	26.66	27.16	27.19	27.09	26.22	26	25.43	27.15	26.16	26.02	24.3
K1C24_HUMAN	Q2M2I5	Keratin, type I cytoskeletal 24	2	-0.14786	0.332392	0.866501	22.01	21.68	14.6	19.79	22.4	21.63	11.41	20.62	19.92	12.19	18.96	14.15	25.44	22.63	17.94	21.63	16.12	18.06	18.62	21.17	19.05	15.29	18.83	19.91	22.36	17.66	22.29	21.7	23.47	22.39	16.54	20.19	22.06	20.88	15.29	14.4	5.11	19.91	22.49	20.14	19.58	18.55	15.2
K1C25_HUMAN	Q7Z3Z0	Keratin, type I cytoskeletal 25	2	0.0515282	0.736752	0.953071	24.64	24.65	23.48	23.32	24.16	25.04	25.13	25.31	24.51	25.36	25.83	26.25	25.28	25.83	24.36	25.97	25.02	24.8	24.5	24.32	24.93	24.95	25.15	24.57	24.16	25.25	24.91	24.46	22	24.68	24.47	25.05	25.33	24.9	24.23	24.38	24	23.62	21.77	24.3	22.89	23.35	24.37
K1C27_HUMAN	Q7Z3Y8	Keratin, type I cytoskeletal 27	3	0.00623409	0.96758	0.990093	24.72	24.62	23.59	23.59	24.4	24.21	24.26	24.87	24.54	24.55	25.35	25.64	24.87	25.52	24.54	25.57	24.71	24.73	24.57	24.34	25.03	24.92	24.85	24.25	23.94	25.23	25.66	25.18	22.49	24.65	24.88	24.56	24.73	24.93	24.56	24.42	23.83	23.09	22.44	24.46	23.17	23.58	25.15
K1C28_HUMAN	Q7Z3Y7	Keratin, type I cytoskeletal 28	2	0.0515282	0.736752	0.953071	24.64	24.65	23.48	23.32	24.16	25.04	25.13	25.31	24.51	25.36	25.83	26.25	25.28	25.83	24.36	25.97	25.02	24.8	24.5	24.32	24.93	24.95	25.15	24.57	24.16	25.25	24.91	24.46	22	24.68	24.47	25.05	25.33	24.9	24.23	24.38	24	23.62	21.77	24.3	22.89	23.35	24.37
K22E_HUMAN	P35908	Keratin, type II cytoskeletal 2 epidermal	30	-0.0127662	0.933667	0.989513	23.77	23.18	22.02	22.96	23.56	23.85	24.08	23.93	23.76	24.93	24.96	24.79	23.87	23.74	23.58	25.05	24.75	24.76	23.32	23.06	24.63	24.79	24.29	22.54	22.9	24.02	23.55	23.52	21.09	24.32	22.82	24.02	24.26	24.57	23.61	24.06	22.09	21.74	21.34	24.13	23.05	21.95	23.02
K22O_HUMAN	Q01546	Keratin, type II cytoskeletal 2 oral	34	0.0602562	0.694176	0.948464	20.9	22.19	20.96	19.59	21.01	20.44	21.2	22.27	20.91	23.21	24.09	24.14	21.73	19.05	21.97	24.53	23.24	23.23	22.63	22.87	23.29	22.99	22.41	19.96	20.63	22.97	22.76	23.18	19.03	21.18	21.11	21.88	23.07	22.85	21.94	21.6	18.8	18.93	19.29	23.11	21.37	20.22	21.66
K2C1B_HUMAN	Q7Z794	Keratin, type II cytoskeletal 1b	5	-0.0810471	0.59663	0.931512	22.97	23	21.29	21.21	23.18	21.57	22.25	22.31	21.94	23.3	24.13	23.99	23.74	23.48	22.87	24.06	23.44	23.83	22.83	22.17	23.3	23.38	23.31	21.83	21.69	23.3	24.07	23.89	20.1	23.04	22.77	23.21	23.39	23.4	23.08	23.12	20.22	19.04	21.92	23.39	22.48	22.39	23.13
K2C1_HUMAN	P04264	Keratin, type II cytoskeletal 1	58	-0.0503482	0.742571	0.953071	23.02	23.16	20.05	20.93	23.07	22.47	24.08	23.59	22.71	24.39	24.55	24.73	23.78	23.33	23.48	24.49	23.41	23.57	22.39	22.49	23.86	23.76	24.02	21.31	22.32	23.4	23.2	22.02	18.71	23.18	22.46	24.16	24.5	23.72	21.72	22.81	22.21	20.82	19.34	23	21.4	21.83	22.39
K2C3_HUMAN	P12035	Keratin, type II cytoskeletal 3	23	0.0901591	0.555869	0.898202	23.33	22.99	22.73	21.89	22.78	23.77	23.44	22.44	22.85	25.38	25.28	25.07	23.79	22.93	24.38	25.32	24.23	24.36	23.89	23.72	25.18	25.07	24.53	22.07	22.61	23.8	24.05	24.08	22.23	24.27	23.24	23.34	24.12	24.55	23.47	23.45	22.27	22.52	21.83	24.41	23.65	21.67	22.74
K2C4_HUMAN	P19013	Keratin, type II cytoskeletal 4	75	-0.0207397	0.892433	0.989513	24.92	24.9	25.12	25.03	25.66	24.41	25.34	24.84	24.97	25.72	26.02	25.79	25.18	24.64	24.88	26.36	25.74	25.85	24.75	24.83	26.04	25.5	24.75	23.83	24.19	25.82	24.09	24.13	24.15	25.5	24.22	24.52	24.51	25.57	25.6	24.95	24.57	24.37	24.22	25.89	25.01	25.55	23.95
K2C5_HUMAN	P13647	Keratin, type II cytoskeletal 5	71	0.0946098	0.536449	0.898202	24.29	24.06	23.54	23.59	23.89	23.05	24.14	23.5	23.22	24.1	24.31	24.27	23.77	23.6	24.14	24.8	24.46	24.54	23.2	23.2	24.41	24.67	24.43	22.89	22.95	24.1	22.99	22.93	22.37	24.08	22.95	23.94	23.98	24.36	23.81	23.92	22.85	22.41	21.98	23.95	23.22	22.63	22.75
K2C6A_HUMAN	P02538	Keratin, type II cytoskeletal 6A	77	0.000261866	0.998638	0.998638	25.29	25.22	24.69	24.61	24.7	24.6	25.16	24.82	24.1	24.82	25.13	25.11	24.84	24.63	25.21	26.07	26	26.06	24.58	24.4	25.66	25.88	25.39	24.08	24.25	24.98	23.76	24	22.88	25.11	24.31	25.06	25.15	25.33	25.01	25.22	23.69	23.56	23.12	25.11	24.3	23.72	24.21
K2C6B_HUMAN	P04259	Keratin, type II cytoskeletal 6B	73	0.0506602	0.741031	0.953071	24.92	24.88	24.15	24.19	24.37	24	24.8	24.52	23.74	24.61	24.92	25.02	24.47	24.24	24.88	25.76	25.69	25.79	24.26	24.04	25.36	25.62	25.09	23.72	23.92	24.71	23.52	23.83	22.56	24.72	23.94	24.8	24.87	25.06	24.4	24.91	23.32	23.29	22.21	24.72	23.97	23.3	23.88
K2C6C_HUMAN	P48668	Keratin, type II cytoskeletal 6C	75	0.00873447	0.954589	0.990093	25.01	24.85	24.15	24.18	24.32	23.96	24.73	24.46	24.17	24.54	24.75	24.54	24.4	24	24.75	25.72	25.52	25.79	24.34	24.19	25.05	25.63	24.93	23.65	23.72	24.29	23.31	23.38	22.58	24.92	23.82	24.44	24.89	24.85	24.27	24.74	23.25	23.28	22.34	24.63	24.01	23.1	23.75
K2C71_HUMAN	Q3SY84	Keratin, type II cytoskeletal 71	5	-0.0910304	0.552042	0.898202	24.92	25.03	24.95	23.95	25.15	25.56	26.41	25.13	25.13	26.5	25.63	25.89	26.63	26.01	25.77	25.89	25.91	25.86	25.25	25.06	26.16	25.72	25.24	24.61	24.27	25.57	23.44	23.1	22.62	26.3	23.74	24.77	24.7	25.66	25.63	25.31	24.86	24.51	23.28	25.78	24.99	25.17	23.81
K2C72_HUMAN	Q14CN4	Keratin, type II cytoskeletal 72	7	0.154287	0.311567	0.866501	24.74	24.75	24.79	24.69	24.91	23.87	24.82	24.71	23.93	24.53	24.95	25.53	23.84	23.56	24.85	26.69	25.98	25.64	24.43	22.89	25.64	25.22	24.72	22.67	23.86	24.76	21.36	21.29	23.15	24.89	20.55	24.58	24.82	24.57	24.34	24.32	24.16	23.69	21.19	24.83	24.03	22.19	23.76
K2C73_HUMAN	Q86Y46	Keratin, type II cytoskeletal 73	7	-0.0430443	0.778899	0.959254	24.89	24.94	25.21	24.7	25.5	25.26	26.07	25.24	25.39	26.33	25.64	26.01	26.14	24.92	25.67	25.98	26.1	25.9	25.3	25.17	26.12	25.65	24.99	24.37	24.1	25.46	24.01	23.84	23.42	26.03	23.8	24.43	24.76	25.52	25.42	24.96	24.9	24.48	23.88	25.74	25.09	25.09	24.29
K2C74_HUMAN	Q7RTS7	Keratin, type II cytoskeletal 74	4	-0.0910304	0.552042	0.898202	24.92	25.03	24.95	23.95	25.15	25.56	26.41	25.13	25.13	26.5	25.63	25.89	26.63	26.01	25.77	25.89	25.91	25.86	25.25	25.06	26.16	25.72	25.24	24.61	24.27	25.57	23.44	23.1	22.62	26.3	23.74	24.77	24.7	25.66	25.63	25.31	24.86	24.51	23.28	25.78	24.99	25.17	23.81
K2C75_HUMAN	O95678	Keratin, type II cytoskeletal 75	22	0.0998778	0.513897	0.894088	24.72	24.15	24.14	24.39	24.24	24.64	25.22	24.21	23.86	25.15	24.99	25.15	24.74	24.21	24.67	25.74	25.18	25.43	24.07	24.29	25.38	25.53	25.02	23.42	23.59	24.77	23.19	23.31	23.24	25.06	23.1	24.32	24.46	24.85	24.34	24.52	23.15	23.04	22.43	24.59	23.91	22.42	22.93
K2C78_HUMAN	Q8N1N4	Keratin, type II cytoskeletal 78	31	-0.12564	0.410868	0.866501	20.89	21.53	19.33	18.47	22.55	19.33	20.75	21.08	20.84	23.06	22.99	22.36	22	18.78	22.14	23.41	22.95	22.97	22.06	21.81	22.04	21.65	21.05	19.52	20.25	22.26	21.66	21.17	19.42	22.93	21.19	21.4	21.81	22.84	21.79	21.81	19.94	19.23	17.93	22.81	22.09	22.37	21.29
K2C79_HUMAN	Q5XKE5	Keratin, type II cytoskeletal 79	12	0.11591	0.448314	0.871703	24.7	23.78	25.03	25.06	24.31	24.61	25.75	25.12	25.11	25.88	25.47	25.7	24.98	23.08	25.15	26.48	26.29	26.05	24.5	24.76	26.01	25.93	24.95	23.44	23.76	25.2	23.36	23.48	23.38	25.49	22.55	24.4	24.71	25.28	24.68	24.72	23.34	23.84	22.38	25.22	24.63	22.81	22.38
K2C7_HUMAN	P08729	Keratin, type II cytoskeletal 7	7	-0.0297999	0.845924	0.980951	22.54	21.36	23.35	23.58	21.66	23.01	25.11	23.98	23.96	25.9	25.1	24.59	23.84	21.08	24.38	25.2	24.69	24.74	22.03	22.77	24.92	25.13	21.31	22.14	20.53	24.34	19.84	20.03	21.12	24.92	21.15	22.96	22.93	24.56	24.15	23.64	20.16	21.79	21.37	24.51	23.87	21.57	20.76
K2C80_HUMAN	Q6KB66	Keratin, type II cytoskeletal 80	6	-0.138093	0.365659	0.866501	17.3	14.97	18.4	16.3	18.4	16.18	16.67	19.13	18.22	19.18	21.64	17.46	14.6	15.09	17.93	21.01	21.61	20.07	18.65	19.87	20.51	20.43	16.62	15.48	17.04	20.87	17.28	18.19	16.28	21.55	19.82	19.05	21.12	21.09	18.32	17.35	15.71	17.43	16.34	21.16	18.87	19.04	17.42
K2C8_HUMAN	Q6P4C7	Keratin, type II cytoskeletal 8	9	0.0042204	0.978049	0.991089	22.65	21.95	22.42	22.28	21.82	21.97	23.51	22.72	22.61	24.57	24.51	24.07	22.68	22.51	23.48	24.59	24.13	24.34	21.89	22.13	24.09	24.42	21.99	21.97	20.91	23.65	21.13	21.31	20.45	23.7	21.87	22.94	22.98	23.74	23.63	23.46	20.03	20.65	20	23.78	23.24	21.25	21.07
KCY_HUMAN	P30085	UMP-CMP kinase	2	0.318864	0.0327698	0.691001	18.58	17.15	15.14	10.02	16.88	11.32	13.88	9.77	15.14	17.03	16.41	13.89	12.48	5.69	14.52	14.65	13.51	17.19	15.7	16.71	16.65	18.82	12.12	14.93	18.5	11.66	15.88	18.47	14.96	15.04	9.65	14.6	16.43	12.55	14.74	14.84	16.86	15.11	17.13	12.54	9.67	10.94	18.44
KLK10_HUMAN	O43240	Kallikrein-10	4	0.309075	0.0388401	0.691001	14.26	17.58	18.7	16.88	16.91	18.39	14.71	14.69	18.62	16.73	20.15	17.84	11.79	14.14	19.5	14.13	16.59	16.44	15.95	16.96	20.11	18.93	18.22	21.4	21.67	20.91	13.99	13.35	17.6	19.14	17.24	19.71	20.28	18.93	15.42	18.69	21.64	21.58	18.27	13.19	20.94	15.31	16.97
KLK1_HUMAN	P06870	Kallikrein-1	2	0.192855	0.204349	0.851194	23.79	23.82	23	23.85	22.64	22.39	23.42	22.67	23.3	23.54	23.09	23.58	23.21	20.23	18.93	23.45	22.01	21.56	20.05	24.01	22.95	23.5	23.61	24.78	24.62	19.91	22.35	21.77	23.12	21.08	21.51	24.05	22.97	24.28	25.67	24.73	24.6	24.39	23.83	24.92	23.38	22.7	24.65
KPYM_HUMAN	Q9BWB5	Pyruvate kinase isozymes M1/M2	22	0.229564	0.129276	0.841506	21.38	20.26	20.63	20.92	19.42	20.21	19.01	20.84	20.85	21.27	19.61	18.6	17.55	16.84	19.67	18.41	19.14	20.19	17.97	19.04	20.95	21.31	20.11	20.83	20.57	21.18	18.98	19.21	21.16	20.8	19.46	20.7	20.67	21.25	19.99	20.33	19.77	19.77	20.64	20.34	20.81	20.44	19.01
KPYR_HUMAN	P30613	Pyruvate kinase isozymes R/L	2	0.266186	0.0771571	0.760251	21.63	21.15	20.16	20.91	20.59	21.16	20.38	20.73	21.01	21.55	20.84	20.25	20.25	15.97	20.84	18.31	17.4	20.05	21.17	20.63	21.08	21.32	20.7	21.34	21.71	21.01	21.05	21.56	21.27	18.44	20.83	20.17	21.24	21.48	20.57	18.51	22.82	20.34	21.59	20.93	21.08	20.52	20.88
KRT36_HUMAN	O76013	Keratin, type I cuticular Ha6	2	-0.265381	0.0780897	0.760251	13.93	15.68	14.62	14.27	22.3	13.74	11.9	23.05	22	12.43	15.59	16.5	20.12	17.29	20.88	15.89	20.31	19.37	16.19	18.14	23.24	16.7	17.43	14.2	12.7	21.94	21.37	16.8	13.84	15.46	12.54	16.15	19.8	21.06	20.04	19.79	10.65	12.09	14.07	21.7	16.24	21.03	21.03
KRT84_HUMAN	Q9NSB2	Keratin, type II cuticular Hb4	5	-0.0353648	0.817602	0.972591	19.51	18.55	18.89	19.99	21.4	18.4	23.56	23.46	22.08	24.53	23.59	21.91	23.14	17.42	21.44	24.04	24.09	23.36	22.55	22.77	24.27	23.65	20.93	18.82	19.84	23.45	20.73	20.19	16.64	23.43	17.22	21.77	21.86	23.53	22.97	21.98	19	19.75	17.81	23.29	20.83	19.7	18.3
KTDAP_HUMAN	P60985	Keratinocyte differentiation-associated protein	2	0.347725	0.0192562	0.691001	14.15	12.45	13.69	13.27	25.15	12.52	6.63	13.09	20.07	13.3	15.01	11.11	15.62	12.76	5.94	20.95	14.09	9.29	16.18	14.58	16.53	19.98	13.16	19.36	20.3	11.6	8.86	16.37	19.32	12.54	6.52	18.68	19.99	12.7	8.94	8.45	18.24	11.84	7.87	2.83	2.2	12.46	17.26
KV106_HUMAN	P01598	Ig kappa chain V-I region EU	2	0.170182	0.263709	0.851194	21.22	19.21	19.1	19.1	20.56	17.36	17.02	19.2	19.04	25.89	19.71	22.25	21.46	16.94	20.84	21.96	19.77	18.83	21.12	21.3	17.66	20.54	21.48	17.73	21.77	20.69	20.73	20.65	20.84	19.14	20.99	21.87	19.28	19.76	20.28	20.86	21.63	21.2	19.1	19.76	20.24	21	19.75
KV110_HUMAN	P01602	Ig kappa chain V-I region HK102	2	0.170182	0.263709	0.851194	21.22	19.21	19.1	19.1	20.56	17.36	17.02	19.2	19.04	25.89	19.71	22.25	21.46	16.94	20.84	21.96	19.77	18.83	21.12	21.3	17.66	20.54	21.48	17.73	21.77	20.69	20.73	20.65	20.84	19.14	20.99	21.87	19.28	19.76	20.28	20.86	21.63	21.2	19.1	19.76	20.24	21	19.75
KV201_HUMAN	P01614	Ig kappa chain V-II region Cum	2	0.114645	0.453317	0.871703	19.25	20.46	22.93	22.91	20.79	23.95	22.04	22.6	22.93	23.89	23.84	24.4	23.55	22.76	22.39	23.03	22.81	23	20.1	21.88	22.78	22.79	23.21	24	23.54	22.33	20.85	21.6	22.76	23.66	21.01	23.17	22.45	22.46	23.14	22.35	23.38	23.24	23.71	23.11	23.82	23.09	21.26
KV204_HUMAN	P01617	Ig kappa chain V-II region TEW	2	0.114645	0.453317	0.871703	19.25	20.46	22.93	22.91	20.79	23.95	22.04	22.6	22.93	23.89	23.84	24.4	23.55	22.76	22.39	23.03	22.81	23	20.1	21.88	22.78	22.79	23.21	24	23.54	22.33	20.85	21.6	22.76	23.66	21.01	23.17	22.45	22.46	23.14	22.35	23.38	23.24	23.71	23.11	23.82	23.09	21.26
KV205_HUMAN	P06309	Ig kappa chain V-II region GM607	2	0.114645	0.453317	0.871703	19.25	20.46	22.93	22.91	20.79	23.95	22.04	22.6	22.93	23.89	23.84	24.4	23.55	22.76	22.39	23.03	22.81	23	20.1	21.88	22.78	22.79	23.21	24	23.54	22.33	20.85	21.6	22.76	23.66	21.01	23.17	22.45	22.46	23.14	22.35	23.38	23.24	23.71	23.11	23.82	23.09	21.26
KV206_HUMAN	P06310	Ig kappa chain V-II region RPMI 6410	2	0.152089	0.318594	0.866501	20.65	16.76	21.82	21.92	21.06	20.03	20.39	21.5	21.68	22.16	22.66	23.21	22.38	19.29	21.16	18.86	19.6	19.2	19.32	21.25	21.18	21.34	18.45	22.92	22.42	21.16	20.99	20.38	21.51	22.61	19.64	22.14	21.81	21.26	22	19.55	22.42	21.97	22.98	22.06	23.27	22.01	21.08
KV302_HUMAN	P01620	Ig kappa chain V-III region SIE	4	0.177287	0.243992	0.851194	22.89	22.66	22.28	22.84	22.87	21.84	22.09	22.76	22.63	23.51	23.7	24.44	23.36	22.93	23.02	21.73	21.37	22.85	21.71	21.73	21.91	21.95	23.04	22.65	23.02	22.24	22.41	22.23	22.56	22.78	22.54	23.55	23.29	22.44	22.88	21.48	22.94	22.31	22.71	22.71	23.53	23.21	22.91
KV305_HUMAN	P01623	Ig kappa chain V-III region WOL	4	0.177287	0.243992	0.851194	22.89	22.66	22.28	22.84	22.87	21.84	22.09	22.76	22.63	23.51	23.7	24.44	23.36	22.93	23.02	21.73	21.37	22.85	21.71	21.73	21.91	21.95	23.04	22.65	23.02	22.24	22.41	22.23	22.56	22.78	22.54	23.55	23.29	22.44	22.88	21.48	22.94	22.31	22.71	22.71	23.53	23.21	22.91
KV308_HUMAN	P04207	Ig kappa chain V-III region CLL	2	0.320249	0.0319784	0.691001	22.13	21.86	22.15	22.27	19.56	19.68	22.32	18.53	22.69	23.32	23.1	23.48	22.32	18.06	21.63	21.14	22.24	22.32	21.63	18.89	22.16	21.98	17.71	22.79	22.93	21.56	21.67	21.25	21.62	22.61	23.46	19.65	22.94	24.51	22.51	21.02	19.35	18.88	17.97	18.79	23.44	20.74	22.02
KV309_HUMAN	P04433	Ig kappa chain V-III region VG	3	-0.0128257	0.933359	0.989513	22.42	22.12	22.54	22.76	23.01	22.21	22.69	22.28	22.79	23.26	22.44	23.42	23.69	22.55	22.62	22.19	22.1	22.28	22.29	21.24	22.28	21.44	22.43	22.53	22.52	22.02	22.66	22.12	21.91	22.51	21.64	22.92	22.77	22.76	22.94	23.29	23.08	22.61	22.67	22.59	23.07	23.28	22.11
KV312_HUMAN	P18135	Ig kappa chain V-III region HAH	5	0.268563	0.0744547	0.760251	21.09	21.25	21.42	21.8	19.38	17.01	20.04	18.54	16.92	22.63	22.7	22.61	22.16	16.03	21.22	19.01	18.34	19.32	19.29	19.03	22.51	18.79	20.4	15.12	21.92	17.26	20.71	18.59	21.49	17.94	18.49	22.31	22.08	19.07	18.78	19.69	21.84	19.74	21.95	20.76	22.5	19.2	20
KV313_HUMAN	P18136	Ig kappa chain V-III region HIC	5	0.268563	0.0744547	0.760251	21.09	21.25	21.42	21.8	19.38	17.01	20.04	18.54	16.92	22.63	22.7	22.61	22.16	16.03	21.22	19.01	18.34	19.32	19.29	19.03	22.51	18.79	20.4	15.12	21.92	17.26	20.71	18.59	21.49	17.94	18.49	22.31	22.08	19.07	18.78	19.69	21.84	19.74	21.95	20.76	22.5	19.2	20
KV401_HUMAN	P06312	Ig kappa chain V-IV region	4	0.133885	0.380589	0.866501	21.68	21.2	21.51	21.45	21.5	18.86	16.48	20.94	21.17	20.92	22.17	22.52	19.63	21.15	20.72	19.98	20.26	19.69	19.29	20.38	19.7	16.68	21.42	21.88	21.59	20.96	20.71	19.46	20.98	19.85	20.19	21.99	21.96	19.89	21.26	19.59	21.25	21.08	21.19	21.52	22.32	21.75	18.2
KV402_HUMAN	P01625	Ig kappa chain V-IV region Len	4	0.133885	0.380589	0.866501	21.68	21.2	21.51	21.45	21.5	18.86	16.48	20.94	21.17	20.92	22.17	22.52	19.63	21.15	20.72	19.98	20.26	19.69	19.29	20.38	19.7	16.68	21.42	21.88	21.59	20.96	20.71	19.46	20.98	19.85	20.19	21.99	21.96	19.89	21.26	19.59	21.25	21.08	21.19	21.52	22.32	21.75	18.2
KV403_HUMAN	P06313	Ig kappa chain V-IV region JI	4	0.133885	0.380589	0.866501	21.68	21.2	21.51	21.45	21.5	18.86	16.48	20.94	21.17	20.92	22.17	22.52	19.63	21.15	20.72	19.98	20.26	19.69	19.29	20.38	19.7	16.68	21.42	21.88	21.59	20.96	20.71	19.46	20.98	19.85	20.19	21.99	21.96	19.89	21.26	19.59	21.25	21.08	21.19	21.52	22.32	21.75	18.2
KV404_HUMAN	P06314	Ig kappa chain V-IV region B17	4	0.133885	0.380589	0.866501	21.68	21.2	21.51	21.45	21.5	18.86	16.48	20.94	21.17	20.92	22.17	22.52	19.63	21.15	20.72	19.98	20.26	19.69	19.29	20.38	19.7	16.68	21.42	21.88	21.59	20.96	20.71	19.46	20.98	19.85	20.19	21.99	21.96	19.89	21.26	19.59	21.25	21.08	21.19	21.52	22.32	21.75	18.2
LAC6_HUMAN	P0CF74	Ig lambda-6 chain C region	3	0.153124	0.315273	0.866501	27.04	26.62	26.75	27.48	26.87	25	26.15	26.65	26.95	26.21	26.83	27.25	27.36	27.09	26.72	27.07	27.17	27.32	26.88	27.15	26.66	26.6	27.72	27.54	27.54	25.97	26.45	25.77	26.58	25.89	26.44	26.68	26.48	26.76	27.21	26.66	27.27	26.6	27.36	27.08	27.96	27.22	26.58
LAC7_HUMAN	A0M8Q6	Ig lambda-7 chain C region	3	0.153124	0.315273	0.866501	27.04	26.62	26.75	27.48	26.87	25	26.15	26.65	26.95	26.21	26.83	27.25	27.36	27.09	26.72	27.07	27.17	27.32	26.88	27.15	26.66	26.6	27.72	27.54	27.54	25.97	26.45	25.77	26.58	25.89	26.44	26.68	26.48	26.76	27.21	26.66	27.27	26.6	27.36	27.08	27.96	27.22	26.58
LC1L1_HUMAN	Q5VSP4	Putative lipocalin 1-like protein 1	5	0.131986	0.387441	0.866501	24.89	23.38	23.62	24.11	23.69	24.56	24.58	23.35	23.65	24.12	23.07	22.28	25.59	23.85	23.04	26.04	24.78	24.7	24.58	24.21	26.01	24.7	23.81	25.29	25.18	25.25	24.38	24.12	25.58	24.94	26.23	25.97	27.05	22.67	22.32	24.28	24.65	24.55	23.19	22.55	23.55	22.72	24.78
LCN1_HUMAN	P31025	Lipocalin-1	13	0.266377	0.076937	0.760251	23.05	20.67	23.13	23.51	22.25	22.37	23.5	22.39	21.4	24.12	22.86	22.25	24.83	23.18	22.15	25.67	24.3	24.48	23.33	21.85	25.17	23.26	22.37	24.66	24.36	24.44	20.46	20.02	25.14	24.11	23.23	24.99	25.92	19.81	20.02	23.28	22.89	23.79	22.37	19.45	20.1	21	21.36
LDHA_HUMAN	P00338	L-lactate dehydrogenase A chain	10	0.184227	0.225721	0.851194	16.02	15.68	17.19	20.39	17.2	15.62	13.25	15.03	13.2	17.18	18.58	19.51	13.39	14.01	16	15.89	17.16	16.51	17.95	17.11	16.26	17.89	17.11	14.67	17.12	15.1	17.96	17.89	19.1	18.69	16.45	16.84	19.72	19.53	13.09	17.16	17.26	16.32	17.6	17.12	19.46	16.94	15.56
LEG3_HUMAN	P17931	Galectin-3	4	0.302245	0.0435984	0.692119	17.18	17.43	17.95	17.16	17.55	18.04	14.59	19.92	17.04	19.07	20.79	21.14	16.28	17.96	17.57	15.65	18.76	19.54	15.48	20.16	19.95	20.27	18.2	18.29	20.67	17.66	18.67	20.66	20.84	21.22	17.25	17.71	20	18.62	15.73	17.07	20.57	20.07	17.51	20.22	20.77	19.57	17.31
LEG7_HUMAN	P47929	Galectin-7	11	-0.0737275	0.630291	0.944461	21.53	21.74	19.26	19.71	21.67	19.56	22.4	21.97	21.68	22.99	22.67	22.45	19.78	21.67	23.08	20.84	22.06	22.13	20.34	21.9	22	21.8	22.27	21.69	20.7	22.81	21.34	22.05	20.2	21.62	21.36	22.31	22.8	22.07	22.17	21.7	22.05	21.76	22.92	22.7	22.62	22.04	22.68
LG3BP_HUMAN	Q08380	Galectin-3-binding protein	11	0.34021	0.0222158	0.691001	20.86	21.17	20.71	21.19	21.1	21.01	20.57	21.02	21.24	21.22	21.45	21.93	21.1	19.5	20.36	21.05	21.1	21	20.09	19.88	20.17	22.04	22.76	21.08	20.9	21.22	20.74	21.51	21.11	21.2	20.99	21.17	21.24	20.76	20.76	20.69	21.53	21.13	21.31	20.9	21.85	21.11	20.94
LKHA4_HUMAN	P09960	Leukotriene A-4 hydrolase	3	0.209468	0.167282	0.848877	18.85	17.41	20.04	17.29	17.43	14.57	8.68	13.75	17.95	17.88	19.83	18.12	14.61	14.05	16.27	19.74	14.65	17.81	17.27	19.03	14.86	15.83	13.98	18.18	18.78	17.91	19.33	20.7	20.71	20.75	17.25	14.49	17.75	17.27	11.69	15.14	19.06	14.61	14.33	20.09	21.39	18.27	15.44
LMNA_HUMAN	P02545	Lamin-A/C	14	0.145901	0.338911	0.866501	18.46	18.63	14.94	13.22	18.98	15.39	15.27	16.23	16.04	19.01	19.99	18.78	13.26	13.87	19.22	18.5	18.52	18.24	17.37	18.44	19.31	19.55	20.13	16.16	18.56	19.23	17.27	18.39	15.45	18.83	14.7	18.88	19.46	19.48	17.66	17.51	16.42	16.34	14.07	19.93	18.7	19.28	18.42
LPLC1_HUMAN	Q9H4V6	Long palate, lung and nasal epithelium carcinoma-associated protein 1	20	0.130458	0.39301	0.866501	19.39	18.14	19.48	19.58	21.49	19.87	21.85	22.42	21.26	19.37	19.59	19.69	19.64	20.03	19.99	21.35	21.78	22.28	19.68	21.91	19.9	19.77	20.36	22.15	22.18	21.6	18.47	17.72	22.7	24	21.59	22.7	24.23	17.65	13.74	20.88	22.89	21.53	18.21	16.71	18.9	17.8	17.44
LV102_HUMAN	P01700	Ig lambda chain V-I region HA	2	0.214836	0.15642	0.848877	19.36	20.05	17.72	13.75	13.12	15.38	18.39	13.52	19.33	17.46	21.79	11.81	17.97	17.77	16.49	16.75	14.74	16.7	16.05	17.76	18.92	21.68	15.27	21.52	21.59	17.18	17.02	17.18	21.9	17.71	18.37	21.03	11.53	17.54	15.22	17.53	17.05	16.63	13.5	18.26	18.13	20.21	19.52
LV106_HUMAN	P04208	Ig lambda chain V-I region WAH	2	0.214836	0.15642	0.848877	19.36	20.05	17.72	13.75	13.12	15.38	18.39	13.52	19.33	17.46	21.79	11.81	17.97	17.77	16.49	16.75	14.74	16.7	16.05	17.76	18.92	21.68	15.27	21.52	21.59	17.18	17.02	17.18	21.9	17.71	18.37	21.03	11.53	17.54	15.22	17.53	17.05	16.63	13.5	18.26	18.13	20.21	19.52
LYSC_HUMAN	P61626	Lysozyme C	9	-0.201457	0.184495	0.848877	24.03	23.99	23.14	23.54	25.49	25.75	24.72	25.22	24.5	22.51	25.54	26.1	26.5	24.85	24.68	24.76	24.11	24	23.45	23.76	24.23	24.43	24.26	24.04	23.66	24.71	21.95	22.62	24.3	25.84	23.42	25.83	25.47	25.56	22.22	22.91	25.22	23.75	25.65	24.52	23.92	23.91	23.21
MDHM_HUMAN	P40926	Malate dehydrogenase, mitochondrial	7	0.262508	0.0814907	0.760251	19.19	15.3	14.26	16.42	16.07	14.57	14.79	14.05	14.43	17.82	19.4	14.9	12.58	12.3	18.54	16.15	13.11	16.96	15.01	15.83	19.38	18.06	14.4	19.84	19.08	17.02	17.04	18.37	13.7	19.59	16.72	15.09	18.47	18.74	14.5	11.47	16.33	17.46	14.61	18.88	18.48	16.98	19.11
ML12A_HUMAN	P19105	Myosin regulatory light chain 12A	3	0.195708	0.197604	0.851194	21.34	20.52	19.56	20.08	20.93	21.65	18.3	19.14	18.72	21.53	19.85	20.05	18.75	14.6	19.9	21.36	20.57	20.2	21.04	21.11	20.54	20.75	20.54	20.18	20.95	19.75	20.88	21.59	20.71	21.05	19.79	19.96	19.28	20.63	18.26	18.64	21.41	19.11	19.8	19.11	19.56	19.38	20.68
MMP9_HUMAN	P14780	Matrix metalloproteinase-9	4	0.0145036	0.924664	0.989513	18.94	16.14	21.56	21.62	14	17.72	8.94	13.11	18.05	19.04	15.02	14.45	16.9	14.5	10.03	21.28	17.7	18	17.19	15.17	17.54	14.01	14.26	14.63	11.62	15.86	17.2	14.18	20.98	20.26	20.66	17.95	18.77	12.53	10.03	12.71	13.61	16.39	19.54	14.17	20.85	15.18	13.91
MOES_HUMAN	P26038	Moesin	8	0.278144	0.0643083	0.72785	19.69	17	18.18	18.47	18.22	17.66	14.59	15.92	17.3	19.3	16.86	18.39	16.05	13.37	18.04	16.75	19.37	19.32	19.16	18.1	17.41	18.41	18.05	20.11	18.07	20.4	19.65	18.49	20.75	19.65	17.62	18.86	18.75	17.34	17	16.33	16.42	19.38	17.32	19.31	19.45	17.37	16.28
MUC5B_HUMAN	Q7M4S5	Mucin-5B	25	0.114941	0.452143	0.871703	24.87	24.19	24.26	23.69	23.8	23.56	23.54	23.33	22.88	24.35	23.89	24.07	23.86	24.21	23.47	24.71	24	23.6	24.08	23.79	23.96	24.3	23.28	24.13	24.26	24.21	22.86	23.24	23.41	24.7	23.34	24.18	24.02	24.35	24.5	23.86	24.11	24.16	24.34	24.49	23.91	23.9	23.76
MUC7_HUMAN	Q8TAX7	Mucin-7	8	-0.0520187	0.734337	0.953071	22.45	22.83	22.25	22.32	22.19	20.71	22.34	22.65	23.71	22.37	23.75	22.92	23.38	23.77	23.25	20.64	19.67	20.39	21.01	22.31	22.1	19.21	20.29	22.27	22.31	23.24	22.72	21.33	22.37	21.19	22.89	23.22	23.07	23.73	23.3	22.93	23.9	23.37	24.33	23.07	22.53	23.15	18.21
MUCB_HUMAN	P04220	Ig mu heavy chain disease protein	5	-0.0513298	0.737729	0.953071	21.45	22.45	22.53	17.75	20.6	15.97	18.06	20.95	19.8	19.93	21.85	21.69	18.23	21.49	21.4	19.66	20.43	21.66	20.96	18.81	13.47	17.82	16.56	19.7	21.22	22.62	23.77	23.22	22.79	21.6	20.1	21.13	21.87	18.59	19.67	18.66	20.77	18.5	20.41	21.92	22.96	21.57	21.76
MYG_HUMAN	P02144	Myoglobin	6	-0.190944	0.208954	0.851194	24.53	22.19	24.11	24.22	23.55	20.5	20.6	23.97	24.76	19.52	19.88	24	19.45	19.51	23.81	24.51	24.77	24.18	24.26	24.2	22.51	15.91	18.48	17.24	22.78	20.93	21.4	23.46	23.25	23.43	21.95	20.37	23.76	22.56	22.72	20.69	23.47	19.72	24.59	22.49	23.16	22.48	19.99
MYH10_HUMAN	P35580	Myosin-10	2	0.0976007	0.523586	0.89638	20.49	19.76	17.79	17.32	19.63	18.46	15.61	16.05	14.7	17.13	15.86	16.66	15.53	11.64	17.46	20.88	19.91	20.03	20.63	20.54	14.91	20.63	18.22	17.44	19.29	17.92	20.96	21.64	17.13	20.85	20.25	15.11	19.87	13.48	17.98	17.75	16.22	15.39	18.19	17.71	17.36	14.23	18.91
MYH11_HUMAN	P35749	Myosin-11	2	0.177374	0.243757	0.851194	20.2	16.05	20.3	20.72	19.81	19.86	16.37	17.11	20.37	21.18	16.76	19.79	15.34	17.05	20.15	19.77	20.7	20.58	18.1	14.12	20.82	21.47	22.65	18.74	20.03	18.85	20.81	19.8	21.22	19.09	20.98	19.74	20.7	20.73	18.74	19.17	19.87	15.62	17.84	20.3	21.01	16.06	16.34
MYH14_HUMAN	Q9H882	Myosin-14	2	0.177374	0.243757	0.851194	20.2	16.05	20.3	20.72	19.81	19.86	16.37	17.11	20.37	21.18	16.76	19.79	15.34	17.05	20.15	19.77	20.7	20.58	18.1	14.12	20.82	21.47	22.65	18.74	20.03	18.85	20.81	19.8	21.22	19.09	20.98	19.74	20.7	20.73	18.74	19.17	19.87	15.62	17.84	20.3	21.01	16.06	16.34
MYH9_HUMAN	P35579	Myosin-9	24	0.198724	0.190649	0.851194	17.76	16.74	16.04	17.46	16.5	15.72	15.98	14.71	16.67	17.47	16.57	15.13	12.54	11.5	15.41	17.11	16.71	17.48	15.78	15.83	16.22	19.07	16.17	15.54	16.79	17.91	17.17	17.06	16.79	17.97	17.27	15.54	15.81	17.22	15.8	14.27	14.08	14.26	13.62	16.25	18.71	17.16	16.31
MYL6_HUMAN	P60660	Myosin light polypeptide 6	5	-0.0345217	0.821879	0.972591	21.97	21.85	21.53	21.93	21.95	22.13	21.69	21.52	21.45	22.31	21.24	20.77	21.35	21	21.92	21.46	21.24	20.99	21.84	21.57	21.83	21.99	21.6	21.56	21.37	21.99	21.46	21.7	22.17	22.01	21.79	21.51	21.34	21.94	21.09	21.66	21.55	21.37	22.3	21.62	21.4	21.8	21.75
NAMPT_HUMAN	P43490	Nicotinamide phosphoribosyltransferase	3	-0.122184	0.423958	0.870123	20.4	17.72	17.26	17.64	17.79	17.08	15.09	15.64	18.32	18.6	19.16	17.63	14.41	15.42	16.29	15.11	16.77	18.36	17.36	18.51	15.61	16.21	17.89	16.42	16.9	18.99	18.17	16.13	17.24	20.03	18.97	19.35	16.95	19.42	17.71	17.16	18.86	21.53	20.24	16.32	20.75	19.58	19.67
NCRP1_HUMAN	Q6ZVX7	Non-specific cytotoxic cell receptor protein 1 homolog	4	-0.128084	0.401751	0.866501	18.56	18.62	15.82	17.6	17.99	13.39	13.09	16.58	18.31	18.07	17.56	15.76	12.56	14.34	18.57	13.63	17.6	18.38	16.02	17.07	16.32	17.93	17.89	13.56	14.8	18.4	19.24	18.5	17.18	15.92	18.48	17.58	17.25	19.45	15.84	14.28	18.68	16.89	19.8	19.52	20.29	18.83	18.53
NDK8_HUMAN	O60361	Putative nucleoside diphosphate kinase	2	0.191583	0.207406	0.851194	20.92	19.81	19.49	16.29	20.54	16.47	20.73	20.57	19.52	21.54	20.78	20.85	16.76	16.46	20.39	19.72	19.82	20.3	19.9	21.48	20.04	20.66	17.11	20.41	20.86	18.81	19.7	20.91	20.98	19.74	20.11	20.28	21.22	20.73	18.54	19.66	21.12	20.79	17.29	18.22	21.79	19.99	17.8
NDKA_HUMAN	P15531	Nucleoside diphosphate kinase A	3	0.0783836	0.608787	0.932653	20.28	17.45	17.19	18.42	20.33	17.37	15.3	19.91	19.5	21.91	20.9	19.99	17.79	16.1	17.9	17.33	18.1	18.03	18.74	17.84	17.37	20.27	18.93	16.37	18	20.11	18.1	18.04	18.85	19.41	14.18	20.05	20.83	20.79	16.97	17.58	21.31	21.25	20.32	17.73	21.5	18.88	19.98
NDKB_HUMAN	P22392	Nucleoside diphosphate kinase B	5	0.151959	0.319011	0.866501	19.97	21.07	16.02	12.49	19.87	14.82	16.56	18.26	17.79	21.28	20.06	19.34	16.58	12.85	16.29	16.21	16.46	18.17	18.56	18.87	17.24	16.76	13.97	13.61	18.66	18.18	18.56	19.05	17.02	16.73	16.26	14.21	20.42	17.91	14.96	17.28	18.52	17.32	17.79	14.12	20.23	17.95	18.74
NDRG1_HUMAN	Q92597	Protein NDRG1	2	0.0337212	0.825944	0.972645	20.06	16.42	12.43	14.51	18.47	14.2	12.6	15.75	15.25	20.73	18.79	4.98	14.76	14.08	10.75	15.31	17.99	14.99	16.83	17.48	18.42	19.46	18.29	9.66	17.67	14.17	18.54	19.84	10.18	13.48	13.49	16.95	19.92	15.67	11.24	14.92	10.38	11.34	13.91	15.56	17.86	14.98	16.04
NGAL_HUMAN	P80188	Neutrophil gelatinase-associated lipocalin	8	0.0400512	0.793926	0.968887	19.28	19.04	17.69	21.66	16.79	17.35	15.81	16.51	15.86	17.73	15.78	16.5	17.09	14.6	14.69	21.57	21.9	18.7	21.5	20.95	17.56	14.93	18.96	20.42	21.63	17.4	20.17	17.66	19.33	20.8	21.91	19.03	20.66	16.78	17.68	15.61	17.15	16.78	18.34	18.52	20.38	21.24	18.29
NIBL1_HUMAN	Q96TA1	Niban-like protein 1	6	0.103327	0.499391	0.888623	20.04	18.99	17.15	15.57	20.12	16.39	18.41	17.89	19.64	20.71	20.35	18.09	16.66	15.43	18.98	17.69	17.45	15.47	15.53	16.87	19.48	20.17	18.92	16.04	17.53	19.66	18.72	20.43	16.29	18.7	18.61	18.93	19.77	20.66	19.56	18.68	17.82	17.07	14.32	20.4	20.38	19.99	20.06
NUCB2_HUMAN	P80303	Nucleobindin-2	2	-0.144373	0.344045	0.866501	21.07	21.93	21.2	20.79	21.97	22.56	22	22.09	21.84	21.38	21.25	21.16	21.26	21.52	21.63	19.71	19.52	20.37	21.15	20.38	21.81	21.47	21.52	21.03	20.85	21.35	21.39	21.47	20.93	21.81	23.03	21.39	21.09	22.41	21.75	22.34	21.97	22.03	21.9	21.53	22.39	21.83	22.56
OTUB1_HUMAN	Q96FW1	Ubiquitin thioesterase OTUB1	2	0.294852	0.0492724	0.692119	11.38	18.56	14.37	11.62	9.84	5.18	14.92	6.19	10.15	15.67	11.59	9.87	13.23	8.76	4.9	12.23	16.57	20.7	14.67	12.22	21.27	19.81	11.74	12.58	15.5	13.95	10.96	14.97	11.82	19.33	8.3	10.57	18.97	17.37	8.65	15.69	10.04	11.52	12.73	13.74	9.82	14.2	12.65
PCBP1_HUMAN	Q15365	Poly(rC)-binding protein 1	2	0.090415	0.554744	0.898202	20.36	17.76	17.45	17.99	20.46	16.69	18.71	19.86	20.17	20.89	21.09	19.78	14.11	14.59	19.74	16.45	19.44	20	15.65	17.36	20.21	20.76	19.01	17.58	19.12	19.48	18.53	19.98	16.14	21.29	18.94	19.59	20.62	20.95	19.65	19.16	19.43	16.64	15.28	20.53	20.44	19.64	16.53
PDIA1_HUMAN	P07237	Protein disulfide-isomerase	20	0.101469	0.507178	0.894088	21.41	20.89	19.99	19.41	21.26	19.39	19.67	20.39	20.32	21.4	20.81	20.86	19.96	17.93	20.14	21.26	21.2	20.96	20.84	21.1	21.3	21.17	20.95	20.42	20.91	21.03	20.43	20.66	21.72	21.08	20.47	20.74	20.75	21.43	20.9	20.26	20.35	19.77	22.37	21.3	22	21.26	20.9
PDIA3_HUMAN	P30101	Protein disulfide-isomerase A3	6	0.213583	0.158907	0.848877	20.31	19.12	16.45	18.12	19.95	17.31	17.52	18.1	18.95	19.94	20.31	17.01	18.29	15.73	19.8	15.9	18.51	19.37	18.5	18.36	20.32	20.6	19.44	18.98	18.78	20.08	19.46	22.34	19.24	18.38	17.65	18.91	19.93	20.46	19.49	17.81	17.37	16.94	18.71	20.49	18.6	20.27	18.42
PDIA6_HUMAN	Q15084	Protein disulfide-isomerase A6	3	0.332535	0.0256228	0.691001	15.35	17.33	18.03	16.07	18.63	15.21	15.03	17	16.04	20.26	17.07	17.5	19.86	13.73	17.96	15.13	19.73	19.87	15.85	17.43	20.51	20.15	19.19	16.6	18.02	19.61	18.58	17.65	19.59	20.15	13.1	18.55	18.2	14.53	19.11	16.86	17.18	16.75	15.38	17.89	20.73	19.41	15.41
PEBP1_HUMAN	P30086	Phosphatidylethanolamine-binding protein 1	2	0.0140788	0.926865	0.989513	20.44	15.27	19.92	15.31	20.35	17.32	17.2	14.76	17.44	21.47	20.25	21.13	13.25	18	20.69	21.62	21.03	18.07	20.76	21.15	20.77	16.41	17.82	21.29	21.27	20.9	18.92	20.99	21.53	19.02	19.58	26.79	20.28	18.9	20	20.08	21.44	22.19	21.15	20.76	21.82	20.94	15.37
PEPL_HUMAN	O60437	Periplakin	52	-0.120245	0.431404	0.871703	19.35	19.3	14.67	15.63	19.45	14.39	16.52	18.21	17.31	20.36	21.08	18.22	17.77	14.64	20.17	20.4	19.22	19.75	18.01	18.66	18.63	20.05	18.93	14.97	15.37	19.82	19.33	19.54	15.1	20.37	18.48	19.16	19.62	19.75	18.77	18.71	16.41	15.27	15.25	20.62	18.89	20.06	20.64
PERL_HUMAN	P22079	Lactoperoxidase	16	0.0146995	0.92365	0.989513	20.95	20.84	21.21	22.41	22.02	22.06	21.28	22.06	22.36	20.98	20.47	21.77	21.8	20.2	21.36	20.79	21.76	21.11	21.31	20.28	22.49	22.31	22.29	20.83	20.81	22.14	21.19	21.27	21.75	21.68	20.25	21.67	22.15	22.25	21.12	20.75	21.36	21.01	21.78	21.27	22.1	21.26	22.05
PERM_HUMAN	P05164	Myeloperoxidase	23	0.0539247	0.724977	0.953071	22.04	21.47	22.69	22.35	20.88	21.83	18.08	20.7	21.81	22.71	19.7	20.34	19.73	19.43	20.8	23.62	23.13	22.39	22.63	22.3	21.78	21.45	21.59	21.39	21.8	22.73	20.58	21.6	23.16	21.73	20.75	20.33	20.89	22	20.77	19.39	21.36	21	22.82	21.58	22.77	21.83	19.93
PGAM1_HUMAN	P18669	Phosphoglycerate mutase 1	9	0.0246088	0.872519	0.984439	18.5	20.37	19.34	19.8	19.65	21.1	18.08	19.54	18.78	20.42	20.77	17.58	17.12	16.5	18.71	18.19	20.4	20.41	21.21	19.19	21.2	21.2	18.3	19.15	20.52	20.69	19.91	20.22	20.98	18.93	18.62	20.52	20.4	21.09	20.56	20.48	20.78	20.09	20.84	21.18	20.59	20.54	19.82
PGAM2_HUMAN	P15259	Phosphoglycerate mutase 2	4	-0.0699951	0.647751	0.948464	15.97	20.55	18.9	21.55	18.8	21.51	18.52	21.7	18.98	19.17	21.62	16.66	16.44	15.32	21.32	20.75	20.74	21.08	22.87	18.31	21.65	21.82	18.44	21.8	21.48	21.11	18.55	18.91	21.8	21.51	19.38	21.06	20.87	21.86	21.07	21.09	21.63	20.81	22.91	21.76	22.3	21.14	18.92
PGAM4_HUMAN	Q8N0Y7	Probable phosphoglycerate mutase 4	6	-0.0179243	0.906967	0.989513	17.74	20.22	19.38	20.99	19.27	20.97	18.44	20.82	19.3	19.98	20.86	17.81	17.57	15.26	19.46	18.62	20.41	20.43	21.31	18.72	21.38	21.13	18.98	20.47	20.43	20.8	19.39	19.61	21.07	20.72	19.96	20.65	20.71	21.41	20.61	20.5	20.88	20.04	22.12	21.46	21.86	20.58	19.39
PGK1_HUMAN	P00558	Phosphoglycerate kinase 1	14	0.0949499	0.534979	0.898202	21.19	20.53	20.88	21.28	21.09	20.82	20.26	20.36	21	20.82	20.25	20.75	18.4	18.28	20.78	20.45	20.52	19.98	21.12	21.31	20.68	20.92	20.09	21.28	21.36	21.2	21.04	21.45	22.28	20.85	21.29	20.78	20.66	21.59	20.62	20.34	20.9	20.41	21.37	21.13	21.96	20.98	20.11
PIGR_HUMAN	P01833	Polymeric immunoglobulin receptor	25	0.111976	0.463967	0.871703	22.85	22.49	22.59	23.62	23.6	23.92	23.79	24.02	24.31	23.87	24	24.64	22.19	23.27	22.69	22.04	22.25	23.45	20.99	22.04	22.4	22.45	23.53	24.06	23.87	21.91	20.77	20.94	23.6	23.17	22.84	23.5	23.8	21.6	22.53	21.01	23.81	22.36	24.05	23.34	23.73	23.09	22.13
PIP_HUMAN	P12273	Prolactin-inducible protein	9	-0.0595629	0.697526	0.948464	25.26	25.8	25.31	24.73	25.35	25.88	25.41	25.87	25.82	25.59	25.37	25.43	25.78	25.35	25.91	25.42	24.79	24.75	25.31	24.95	25.77	25.08	24.87	25.25	24.84	24.81	25.66	25.8	25.99	25.6	25.22	24.94	24.97	25.48	24.86	24.96	25.25	25.46	25.99	24.87	25.06	24.76	25.91
PKP1_HUMAN	Q13835	Plakophilin-1	18	0.0245988	0.872571	0.984439	20.61	20.37	17.12	16.01	20.52	14.86	17.89	19.73	19.42	21.43	21.39	19.96	18.58	16.53	20.58	20.43	20.04	20.07	19.76	20.22	20.23	21.06	20.73	16.71	17.78	19.83	19.99	20.49	15.38	18.19	18.88	20.76	20.45	20.79	19.17	20.43	16.55	15.31	14.2	20.84	18.99	19.43	20.18
PKP3_HUMAN	Q9Y446	Plakophilin-3	3	0.0923279	0.546365	0.898202	10.67	14.22	12.16	12.75	17.78	9.93	15.19	16.32	16.4	18.93	19.36	12.63	11.77	12.57	14.3	13.13	10.19	12.95	8.25	14.28	18.27	19.91	12.48	15.84	10.74	15.53	21.93	10.32	12.78	12.06	16.11	16.19	19.68	17.12	14.1	15.48	13.66	11.69	11.23	18.18	12.44	16.03	8.12
PLAK_HUMAN	P14923	Junction plakoglobin	30	0.0438013	0.77511	0.959254	21.2	21.77	16.45	17.48	20.34	17.66	19.61	20.16	19.37	22.01	22.26	20.28	19.51	17.98	21.26	19.59	20.87	20.55	19.39	20.39	21.69	22.06	21.29	18	19.06	21.2	20.36	20.54	15.21	19.99	20.36	20.73	20.94	21.25	20.18	20.6	17.66	18.03	16.34	20.89	20.65	20.38	19.66
PLIN3_HUMAN	O60664	Perilipin-3	4	0.0465877	0.761211	0.953071	20.75	20	14.48	17.66	15.38	12.1	13.84	13.77	16.06	16.81	17.55	15.38	14.26	16.65	18.53	16.44	14.33	17.11	15.3	19.14	14.39	16.4	19.39	14.27	13.96	15.64	16.76	20.29	13.23	15.51	17.56	19.66	20.47	17.18	17.23	12.73	13.62	13.65	15.94	15.6	14.45	17.99	18.19
PLSI_HUMAN	Q14651	Plastin-1	2	-0.00933527	0.951469	0.990093	19.31	15.72	12.69	13.95	19.26	14.85	12.35	11.98	12.36	20.59	20.51	19.25	18.03	11.72	19.79	18.55	17.26	19.01	18.24	19.54	19.55	19.65	16.08	13.94	13.97	17.54	19.83	20.19	15.36	15.98	14.97	19.32	20	20.27	17.18	17.56	14.8	11.08	15.96	19.63	20.48	19.15	19.08
PLSL_HUMAN	P13796	Plastin-2	10	0.0769171	0.615526	0.933206	18.64	19.49	20.36	21.38	19.14	19.52	15.01	19.04	19.27	18.29	18.21	17.96	16.21	17.07	18.83	18.9	19.47	19.89	19.65	18.26	19.19	18.14	18.06	19.95	19.41	21.04	19.17	20.24	21.54	19.1	20.06	18.65	19.34	18.05	18.89	17.19	19.57	18.71	20.42	19.52	20.95	19.8	18.48
PLST_HUMAN	P13797	Plastin-3	8	0.0255886	0.867488	0.984439	15.75	13.63	11.91	13.01	18.32	11.49	14.46	11.86	13.91	16.86	18.5	16.68	13.32	12.22	16.78	15.7	15.47	13.65	13.36	16.21	14.96	18.83	14.94	13.56	13.19	17.31	17.99	17.24	14.64	15.01	17.35	17.51	16.65	19.16	15.93	13.21	14.74	12.95	14.12	16.21	15.65	17.1	16.26
PNPH_HUMAN	P00491	Purine nucleoside phosphorylase	4	-0.045698	0.765641	0.953071	14.84	15.65	15.11	14.85	15.05	16.03	13.99	16.1	12.43	16.68	17.82	11.51	14.02	16.37	17.21	18.61	17.78	19.75	17.95	18.46	14.86	15.62	14.77	16.02	19.37	19.44	16.81	16.86	20.26	16.94	17.08	18.95	19.11	16.53	14.72	13.6	16.6	17.79	15.04	16.65	20.9	9.8	13.89
POF1B_HUMAN	Q8WVV4	Protein POF1B	6	0.142043	0.351971	0.866501	16.65	16.33	10.16	12.08	12.75	10.41	9.63	14.17	15.73	19.08	20.35	15.4	11.18	12.39	12.53	18.32	19.49	17.76	17.02	17.64	14.86	17.57	16.57	10.03	12.62	15.49	15.91	17.4	12.48	15.26	9.47	15.52	18.77	13.77	12.53	12	10.56	8.97	10.14	16.43	11.05	8.99	15.15
POTEE_HUMAN	Q6S8J3	POTE ankyrin domain family member E	18	-0.00719338	0.962595	0.990093	22.49	22.93	23.92	24.13	23.2	24.22	23.61	23.27	23.14	24.12	23.42	23.76	21.46	22.24	23.3	23.93	24.34	23.45	24.02	23.73	23.39	22.94	22.43	22.41	23.37	23.67	22.75	22.18	24.78	23.97	22.75	22.88	23.47	23.68	22.48	22.52	23.52	22.96	23.79	23.44	23.28	23.47	23.21
POTEF_HUMAN	A5A3E0	POTE ankyrin domain family member F	17	0.1254	0.411767	0.866501	22.8	23.1	23.94	24.03	23.16	24.26	22.75	22.55	23.03	24.26	23.45	23.71	22.01	22.11	23.25	23.7	24.18	23.52	24.1	23.72	23.43	22.78	22.44	22.8	23.65	23.63	22.71	22.07	24.76	23.8	22.94	22.8	23.74	22.84	22.42	22.6	22.74	23	23.75	23.48	23.26	23.12	23.12
PPIA_HUMAN	P62937	Peptidyl-prolyl cis-trans isomerase A	9	-0.00920121	0.952165	0.990093	22.66	22.24	22.11	21.86	22.55	22.31	22.52	22.1	22.08	22.66	22.52	22.24	21.71	21.95	22.39	22.54	22.17	22.22	22.48	22.49	22.32	22.45	21.87	22.18	22.72	22.36	20.59	21.33	22.96	21.95	22.63	22.11	21.73	22.7	22.38	22.27	22.25	21.96	23.29	22.39	22.42	22.14	20.67
PPIB_HUMAN	P23284	Peptidyl-prolyl cis-trans isomerase B	7	0.22009	0.146296	0.848877	19.48	20.59	15.03	18.49	19.97	17.58	16.89	20.06	19.65	18.28	20.68	20.88	18.45	16.3	20.89	15.87	14.49	16.92	18.14	15.41	16.99	19.69	18.15	19.51	20.4	19.36	16.69	17.91	20.31	17.17	14.66	20.47	20.76	17.39	17.48	19.03	20.51	16.47	18.44	18.21	21.24	20.41	15.51
PRB2_HUMAN	P02812	Basic salivary proline-rich protein 2	12	0.492845	0.000582888	0.141059	25.57	25.99	24.78	25.35	19.91	17.32	22.03	25.35	25.36	20.79	19.18	24.79	25.5	15.81	18.8	12.86	22.97	15.04	20.93	14.84	22.88	25.66	23.47	24.46	24.93	26.49	24.34	22.62	26.82	15.06	16.03	25.07	23.39	23.62	20.98	25.43	26.15	25.3	10.52	15.8	13.84	16.94	22.83
PRB3_HUMAN	Q04118	Basic salivary proline-rich protein 3	9	0.239134	0.113633	0.810958	24.84	24.62	23.66	20.47	21.16	24.92	22.04	23.25	25.06	24.41	24.88	23.94	23.14	19.63	22.58	13.41	23.45	14.85	21.31	16.59	22.58	22.15	19.43	21.62	21.82	24.47	19.84	20.02	24.42	22.74	21.7	24.25	23.2	24.76	23.57	23.91	24.35	24.66	17.07	21.97	11.57	19.16	22.85
PRB4_HUMAN	P10163	Basic salivary proline-rich protein 4	3	-0.0267171	0.861699	0.984439	27.35	26.7	28.4	26.04	25.81	28.62	27.74	28.11	28.41	22.76	23.81	24.72	26.11	22.18	22.51	23.8	26.15	22.1	26.6	23.22	26.58	24.89	22.06	24.24	24.19	25.75	23.96	24.09	26.33	25.88	26.06	22.21	25.95	27.97	25.23	25.79	26.58	27.13	22.52	24.28	22.99	23.25	26.68
PRDX1_HUMAN	Q06830	Peroxiredoxin-1	12	0.254039	0.0921923	0.792107	20.77	20.65	20.66	20.42	19.52	19.88	20.93	21.3	20.83	22.22	22.11	22	20.82	18.94	21.73	21.63	21.39	20.93	19.83	18.98	21.91	21.94	21.03	21.17	21.08	21.57	19.71	19.52	20.99	22.82	20.29	21.08	21.59	22.07	20.41	21.42	21.79	21.75	20.7	21.67	21.85	21.13	21.04
PRDX2_HUMAN	P32119	Peroxiredoxin-2	5	0.385878	0.00884568	0.691001	19.77	19.39	21.06	16.87	19.23	14.95	16.6	20.3	17.39	18.93	16.74	18.59	15.24	15.89	18.12	20.09	16.79	17.92	19.32	19	21.91	19.63	18.49	21.29	19.76	18.72	19.19	19.19	19.08	18.09	17.65	17.75	19.76	17.85	19.07	15.75	19.18	17.31	17.08	18.94	19.59	17.84	20.03
PRDX5_HUMAN	P30044	Peroxiredoxin-5, mitochondrial	7	0.247076	0.101782	0.792107	18.34	19.6	18.65	20.82	19.54	17.91	17.81	18.5	20.07	19.9	20.85	18.3	17.09	13.73	19.43	18.6	17.45	19.3	15.68	17.35	20.42	20.36	19.02	20.43	20.73	18.68	17.29	17.14	20.78	19.75	19.01	20.19	19.91	19.83	19.14	18.72	21.05	18.58	20.18	20.39	21.61	20.56	16.96
PRDX6_HUMAN	P30041	Peroxiredoxin-6	6	-0.0775147	0.612776	0.932653	20.79	20.44	17.38	17.74	20.94	18.06	19.28	19.44	20.1	21.53	20.91	20.75	17.83	18.41	19.85	19.18	19.69	19.14	19.95	20.42	20.36	20.1	19.61	18.63	20.09	20.31	20.35	20.54	20.72	20.81	20.78	20.23	20.31	21.05	20.1	20.02	19.91	17.16	21.82	20.77	20.9	20.87	20.47
PROF1_HUMAN	P07737	Profilin-1	10	0.251941	0.0950059	0.792107	22.11	21.64	21.2	22.2	22.09	22.23	20.68	20.36	21.01	21.9	21.39	21.15	19.84	19.21	22.01	19.89	21.19	19.81	21.69	21.9	21.57	21.78	22.25	22.14	22.54	22.11	22.01	21.97	22.78	21.66	22.62	21.13	21.91	20.39	21.05	22.08	21.96	21.04	22.73	21.54	22.73	22.1	21.34
PROL4_HUMAN	Q16378	Proline-rich protein 4	5	0.175369	0.249213	0.851194	8.23	12.06	16.27	15.2	10.48	9.87	21.23	20.86	10.13	12.63	17.26	4.45	22.11	8.46	21.3	12.12	14.86	11.62	8.41	6.04	16.92	17.6	18.22	17.94	17.7	11.01	13.69	13.81	9.65	23.23	15.47	21.66	23.33	15.56	18.79	18.86	23.03	21.61	12.45	6.13	8.82	9.89	11.01
PRP1_HUMAN	P04280	Basic salivary proline-rich protein 1	12	0.35176	0.0178094	0.691001	23.03	23.61	24.11	20.68	21.12	22.96	24.13	25.61	25.8	23.64	20.91	26.51	25.74	20.01	20.88	14.27	21.65	11.81	21.55	16.82	23.39	24.47	18.63	21	23.23	26.42	18.17	19.07	24.17	15.44	15.38	24.64	23.25	21.69	17.79	24.88	22.21	25.01	12.17	15.29	10.14	14.14	21.57
PRPC_HUMAN	P02810	Salivary acidic proline-rich phosphoprotein 1/2	18	0.215195	0.15571	0.848877	23.83	24.4	25.48	24	22.65	22.4	22.64	25.56	25.56	21.97	19.81	23.02	24	18.37	24.16	17.92	22.8	12.57	24.48	19.26	23.6	22.12	22.05	20.93	21.25	25.59	24.97	23.48	25.39	22.96	18.67	24	24.26	25.74	22.37	23.98	24.67	25.56	17.05	20.01	14.27	19.58	24.79
PRTN3_HUMAN	Q9UQD8	Myeloblastin	4	-0.202735	0.181668	0.848877	22.56	22.02	23.36	22.99	23.11	22.48	24.5	22.56	23.3	23.27	20.92	22.54	22.46	19.5	22.7	23.66	23.63	22.63	22.86	22.88	21.42	19.13	21.28	20.87	21.24	24.04	23.82	23.93	24.83	21.75	22.02	21.68	22.17	21.98	22.29	20.72	22.25	22.09	24.3	22.38	23.44	22.88	22.03
PSA3_HUMAN	P25788	Proteasome subunit alpha type-3	3	0.114334	0.454551	0.871703	-6.49	4.98	14.16	1.91	14.05	3.54	5.88	6.77	-9.97	-9.52	18.4	4.62	4.48	4.58	2.12	7.17	-2.08	1.15	1.82	-11.57	-6.22	7.99	2.53	7.26	2.93	26.59	-10.09	6.31	4.94	0.33	-3.42	4.59	13.62	6.71	11.51	-4.12	2.11	2.37	2.75	6.83	19.35	-5.89	3.36
PSA_HUMAN	P55786	Puromycin-sensitive aminopeptidase	2	0.0761338	0.619138	0.933529	18.27	17.6	14.32	15.59	19.02	8.96	13.17	18.29	16.74	19.56	20.27	14.58	16.34	7.77	17.84	18.5	17.92	18.87	16.86	16.35	15.57	19.77	16.81	12.94	14.27	19.35	18.28	19.55	19.05	17.4	17.61	18.36	20.1	20.29	13.79	15.86	17.13	15.65	13.16	17.68	21.29	18.9	18.34
PSME2_HUMAN	Q9UL46	Proteasome activator complex subunit 2	3	0.111756	0.464851	0.871703	15.6	15.56	15.63	13.42	9.97	14.3	14.12	15.34	14.64	15.69	18.62	15.41	11.58	14.13	16.97	12.66	16.64	18.07	17.38	16.04	16.55	15.3	16.77	14.53	17.03	16.75	17.99	18.85	18.07	19.72	15.02	12.31	16.46	17.67	13	15.15	15.7	16.32	18.3	15.83	19.67	16.25	16.54
PYGL_HUMAN	P06737	Glycogen phosphorylase, liver form	4	0.148573	0.33004	0.866501	15.55	16.16	19.55	16.69	17.01	17.43	13.39	12.82	17.43	19.74	16.72	16.54	14.1	12.85	12.69	15.73	13.57	20.92	17.7	18.15	15.99	14.32	15.1	19.34	19.38	19.15	18.25	19.43	20.36	18.68	16.43	15.75	15.46	15.57	13.66	14.89	14.83	13.26	17.61	17.3	21.31	17.97	14.91
PZP_HUMAN	P20742	Pregnancy zone protein	5	0.111354	0.466469	0.871703	19.99	20.12	20.51	20.2	10.62	8.11	10.36	12.47	11.12	11.43	14.54	10.44	11	11.06	11.01	14.85	21.34	21.88	21.53	18.93	15.37	14.86	11.1	19.93	20.05	18.13	21.92	20.4	20.14	22.19	17.66	19.72	20.38	12.79	15.35	9.66	19.38	15.07	19.52	19.78	21.11	9.86	10.11
RAB10_HUMAN	P61026	Ras-related protein Rab-10	4	0.0737322	0.630269	0.944461	17.66	14.21	23.19	17.72	16.01	17.32	17.15	16.75	16.18	16.79	22.57	13.03	18.74	17.34	21	14.71	18.66	18.14	19.48	17.9	18.52	20.68	19.94	17.6	19.13	15.29	14.76	20.68	18.56	18.45	19.61	18.73	15.48	18.89	20.66	18.05	17.13	15.12	19.41	20.08	15.83	19.26	13.54
RAB1A_HUMAN	P62820	Ras-related protein Rab-1A	2	0.10391	0.496961	0.888623	21.33	14.88	17.29	14.78	19.9	15.56	17.14	17.13	13.57	13.85	23.43	16.83	17.37	14.46	19.75	16.99	21.34	18.86	19.78	17.25	20.72	17.15	20.15	18.62	20.54	13.13	14.91	21.85	20	17.01	20.09	20.45	17.92	17.42	17.98	17.43	19.28	13.92	18.56	19.68	13.88	20.47	16.75
RAB1B_HUMAN	Q9H0U4	Ras-related protein Rab-1B	3	0.0130405	0.932245	0.989513	18.96	12.51	11.78	12.74	16.34	8.17	13.95	14.22	10.36	13.56	20.1	8.56	15.26	14.18	14.79	8.19	17.44	15.12	17.68	13.07	17.74	17.35	12.25	16.5	14.53	10.59	11.25	17.08	13.23	17.41	16.54	19.64	11.42	20.51	12.76	12.71	18.58	14.17	16.98	8.03	15.26	14.08	16.98
RAB1C_HUMAN	Q92928	Putative Ras-related protein Rab-1C	3	0.0130405	0.932245	0.989513	18.96	12.51	11.78	12.74	16.34	8.17	13.95	14.22	10.36	13.56	20.1	8.56	15.26	14.18	14.79	8.19	17.44	15.12	17.68	13.07	17.74	17.35	12.25	16.5	14.53	10.59	11.25	17.08	13.23	17.41	16.54	19.64	11.42	20.51	12.76	12.71	18.58	14.17	16.98	8.03	15.26	14.08	16.98
RAB7A_HUMAN	P51149	Ras-related protein Rab-7a	3	0.190091	0.211034	0.851194	17.4	15.88	17.97	17.45	18.4	14.25	14.82	15.51	15.14	20.41	18.36	17.04	13.73	14.85	17.74	13.77	16.51	18.68	16.45	18.56	17.01	17.98	12.85	18.01	16.99	19.42	17.93	19.95	19.75	17.45	15.34	18.27	17.96	17.06	14.19	16.26	13.65	14.46	17.26	17.54	18.62	17.93	18.8
RABP2_HUMAN	P29373	Cellular retinoic acid-binding protein 2	2	0.178378	0.241054	0.851194	16.22	18.45	18.09	14.82	17.41	17.9	17.4	16.63	16.05	17.32	16.06	17.36	13.47	16.04	17.89	18.42	14.26	16.9	15.18	17.76	18.23	20.53	15.07	21.07	21.39	17.27	21.45	19.65	18.21	18.11	14.51	16.28	16.1	19.79	17.16	17.33	20.21	19.87	17.63	20.3	18.33	17.95	18.3
RAC1_HUMAN	P63000	Ras-related C3 botulinum toxin substrate 1	2	0.0701581	0.646984	0.948464	20.33	19.66	20.42	21.2	17.42	16.88	13.59	16.86	17.49	17.17	19.59	18.17	17.99	12.95	13.79	21.78	21.5	21	21.05	20.95	17.57	19.38	15.14	16.48	17.24	20.06	17.96	17.22	20.44	21.54	19.52	18.36	20.53	13.95	13.9	14.93	18.03	15.68	20.76	19.61	20.71	20.12	16.25
RAC2_HUMAN	P15153	Ras-related C3 botulinum toxin substrate 2	3	0.0351554	0.818664	0.972591	17.4	18.82	18.11	19.06	17.64	17.76	13.91	15.72	18	17.86	19.31	16.28	15.14	13.09	14.06	20.24	17.98	17.44	17.83	20.01	16.35	17.39	15.41	15.47	16.32	19.7	14.99	17.77	20.12	19.3	19.44	16.56	19.41	13.78	14.76	15.28	17.42	14.71	18.93	18.05	19.47	18.58	16.69
RADI_HUMAN	P35241	Radixin	4	0.1827	0.229658	0.851194	20.37	16.98	16.3	18.09	19.16	15.78	14.71	18.21	19.16	19.65	20.26	17.98	15.36	12.39	20.5	15.15	19.02	19.06	19.72	17.77	16.8	19.58	18.73	20.42	18.54	20.77	19.25	19.68	21.43	18.82	18.43	20.12	18.88	18.45	19.07	19.03	19.4	21.55	17.52	20.64	18.9	18.27	19.25
RAN_HUMAN	Q9CWI7	GTP-binding nuclear protein Ran	4	-0.0922269	0.546806	0.898202	19.99	18.31	12.69	14.24	17.6	15.73	15.83	18.96	17	17.21	17.63	16.61	15.22	15.81	15.87	20.78	17.83	18.93	19.68	18.7	16.99	17.32	16.3	16.8	17.46	17.48	17.36	17.57	19.54	20.33	17	15.18	17.5	17.48	17.19	12.08	15.29	13.27	18	17.68	19.38	14.4	17.28
RINI_HUMAN	P13489	Ribonuclease inhibitor	2	0.202089	0.183094	0.848877	20.38	19.85	17.06	18.21	19.77	12.69	18.03	18.27	17.99	20.55	20.33	17.64	14.22	16.62	19.83	18.25	17.41	17.16	18.82	19.78	17.9	20.71	19.09	18.25	19.53	14.86	19.47	20.68	16.67	16.54	15.03	19.67	20.37	20.33	12.64	18.72	14.74	15.84	18	19.98	16.47	19.47	19.96
RL10_HUMAN	P27635	60S ribosomal protein L10	2	-0.0872526	0.568728	0.898202	15.35	5.22	9.93	4.42	14.13	12.3	9.34	12.08	13.01	19.41	19.37	9.45	12.79	11.86	13.58	11.62	13.64	12.94	13.58	11.24	17.89	14.42	18.51	5.43	12.2	11.95	11.97	10.86	14.51	4.22	15.64	12.74	19.19	17.27	9.04	15.48	12.66	12.08	13.29	19.49	6.43	16.4	10.45
RL11_HUMAN	P62913	60S ribosomal protein L11	2	0.331741	0.0259988	0.691001	20.17	16.79	15.59	19.21	15.88	11.16	18.5	15.21	15.43	17.74	20.91	16.78	12.02	12.79	12.25	12.61	11.14	12.96	14.64	7.96	16.66	20.82	17.8	16.16	13.52	19.62	19.4	20.47	8.82	17.09	14.18	6.05	20.07	18.72	16.52	14.75	10.26	15.16	14.43	16.77	19.8	19.02	15.69
RL3_HUMAN	P39023	60S ribosomal protein L3	3	-0.112581	0.461543	0.871703	17.04	19.66	15.74	18.01	16.8	14.88	16.26	17.1	14.99	20.34	20.13	7.1	15.87	16.89	18.72	18.19	17.57	16.24	16.66	17.23	10.24	20.55	16.42	13.43	11.89	15.88	21.86	15.87	18	19.09	15.42	15.33	19.1	18.84	12.54	17.74	14.58	9.4	13.27	18.02	12.09	15.85	17.66
RL7A_HUMAN	P62424	60S ribosomal protein L7a	2	0.223603	0.139801	0.848877	12.25	25.33	18.36	19.85	19.08	9.19	20.32	10.23	14.35	18.19	20.83	23.77	17.55	14.41	18.48	17.69	13.74	18.12	17.1	17.41	16.73	20.58	16.41	10.01	12.66	10.7	18.44	18.8	18.77	16.5	14.1	19.48	18.93	14.31	17.51	14.84	14.78	14.85	13.59	20.03	17.01	17.79	16.79
RL7_HUMAN	P18124	60S ribosomal protein L7	3	0.0161019	0.91639	0.989513	14.98	13.14	15.14	7.92	13.45	15.76	7.35	13.13	9.53	18.17	20.73	11.91	11.77	20.83	10.4	17.56	15.16	10.08	16.26	17.54	18.51	18.56	17.78	10.54	11.87	13.99	13.78	9.98	15.24	17.99	14	16.47	15.09	13.69	14.09	14.36	15.85	12.31	13.72	12.3	14.6	17.1	14.86
RLA0L_HUMAN	Q8NHW5	60S acidic ribosomal protein P0-like	5	0.0978198	0.52265	0.89638	20.41	18.25	15.6	16.21	20.08	13.88	13.04	14.85	17.96	18.54	19.93	18.34	16.77	14.78	18.27	18.06	18.14	18.34	16.52	18.71	19.45	19.33	18.78	16.84	13.56	17.64	19.63	19.1	17.59	20.51	18.47	19.51	20.45	19.8	17.86	17.66	14.12	15.46	14.65	18.59	15.58	18.31	18.17
RLA0_HUMAN	P05388	60S acidic ribosomal protein P0	5	0.0978198	0.52265	0.89638	20.41	18.25	15.6	16.21	20.08	13.88	13.04	14.85	17.96	18.54	19.93	18.34	16.77	14.78	18.27	18.06	18.14	18.34	16.52	18.71	19.45	19.33	18.78	16.84	13.56	17.64	19.63	19.1	17.59	20.51	18.47	19.51	20.45	19.8	17.86	17.66	14.12	15.46	14.65	18.59	15.58	18.31	18.17
RLA2_HUMAN	P05387	60S acidic ribosomal protein P2	4	0.241636	0.109792	0.810958	21.56	21.39	17.98	19.39	21.13	18.31	18.68	20.84	20.43	17.68	21.33	20.07	19.78	19.26	21.13	19.02	19.34	18.57	19.77	18.23	21.27	21.12	20.7	21.33	21.9	21.1	20.38	20.78	19.4	19.11	20.07	21.11	21.15	21.64	18.57	20.26	21.39	21.17	16.51	20.69	21.4	20.97	20.6
ROA1_HUMAN	P09651	Heterogeneous nuclear ribonucleoprotein A1	2	0.116734	0.445071	0.871703	17.94	19.19	13.64	14.51	18.74	12.82	14.98	12.13	13.68	16.54	20.31	12.88	14.35	11.97	16.58	17.12	17.04	19.3	16.47	23.18	19.85	20.05	18.46	16.48	17.93	18.6	16.44	17.82	16.09	20.67	16.83	18.46	20.14	19.79	21.25	12.76	12.25	16.1	9.93	19.62	20.68	17.95	14.9
ROA2_HUMAN	P22626	Heterogeneous nuclear ribonucleoproteins A2/B1	2	0.103614	0.498196	0.888623	11.63	7.12	12.24	10.18	12.33	12.82	7.15	13.34	11.09	15.96	18.73	8.83	13.99	7.58	11.29	14.1	14.3	12.7	10.71	10.2	14.2	11.13	18.32	14.42	16.34	15	11.68	12.83	6.13	14.26	15.99	12.91	18.8	14.21	12.99	8.09	8.8	13.06	9.44	19.12	13.9	15.36	14.89
RPTN_HUMAN	Q6XPR3	Repetin	10	-0.218921	0.148504	0.848877	6.26	8.49	6.56	3	11.64	9.58	6.86	10.51	5.87	7.77	15.01	10.18	6.04	11.61	9.44	15.27	13.32	18.19	14.07	16.37	14.75	10.93	14.8	7.21	7.4	10.29	12.7	12.92	8.57	5.61	10.23	15.37	14.4	13.37	7.43	9.06	8.52	9.2	7.44	12.04	9.16	9.62	9.8
RS15A_HUMAN	P62244	40S ribosomal protein S15a	2	0.087937	0.565688	0.898202	20.67	20.03	11.56	17.74	20.3	14.77	15.58	19.93	14.88	12.41	20.35	17.63	16.41	12.01	12	20.46	20.36	17.92	19.31	20.42	20.53	21	19.68	15.55	18.56	20.06	20.03	20.88	15.47	20.47	18.95	19.89	20.45	16.97	14.78	17.17	15.88	15.18	14.37	19.59	18.01	19.41	18.24
RS18_HUMAN	P62269	40S ribosomal protein S18	2	0.150017	0.325308	0.866501	20.41	12.75	17.92	16.62	18.99	15.82	15.47	15.58	11.33	18.44	19.88	13.89	11.38	20.07	15.79	17.42	18.65	16.89	15.46	18.88	20.41	20.85	18.59	13.83	20.53	19.25	14.77	20.76	17.14	20.83	15.4	19.94	21.03	13.25	15.96	10.65	12.69	8.56	17.54	14.82	20.54	16.63	18.2
RS19_HUMAN	P39019	40S ribosomal protein S19	2	0.139082	0.362203	0.866501	13.35	17.86	11.27	4.36	17.27	13.98	17.34	14.43	10.84	15.19	18.21	14.98	10.85	11.21	11.91	18.54	15.04	13.85	16.3	15.58	15.14	17.75	18.73	15.66	18.54	13.98	16.8	16.47	13.84	15.72	12.13	17.68	15.43	15.62	17.29	12.4	12.53	9.65	12	9.6	16.36	12.66	16.56
RS2_HUMAN	P15880	40S ribosomal protein S2	2	-0.129496	0.396541	0.866501	20.39	19.8	15.22	13.44	19.34	13.79	8.95	15.86	15.52	17.7	18.77	13.63	11.49	19.64	16.39	11.58	17.41	16.31	18.2	18.75	16.16	21.15	17.93	13	10.01	19.99	16.85	20.16	13.59	18.92	18.02	19.58	19.87	18.27	18.63	18.87	15.33	14.54	12.93	19.95	19.39	17.76	20.26
RS3_HUMAN	P23396	40S ribosomal protein S3	4	0.0545184	0.72207	0.953071	18.68	17.43	14.35	12.59	18.18	14.51	15.95	16.95	15.36	20.24	20.37	13.65	12.72	10.85	17.35	16	19.59	19.27	15.8	15.74	18.58	20.57	17.58	12.98	14.86	16.3	19.11	18.81	13.33	17.78	15.8	17.06	18.76	18.6	16.04	13.79	15.11	14.12	17.02	17.37	19.84	16.93	17.59
RSSA_HUMAN	Q86VC0	40S ribosomal protein SA	3	0.315827	0.034563	0.691001	20.49	17.06	16.79	13.92	16.31	14.34	18.29	15.26	17.02	16.45	18.22	18.08	18.17	10.8	17.86	14.45	17.96	13.06	13.88	15.41	19.15	23.38	16.8	15.58	18.3	16.9	17.51	20.4	15.56	17.76	18.42	16.73	19.4	19.21	17.3	16.87	18.86	14.78	12.57	18.58	17.87	16.4	19.23
S100P_HUMAN	P25815	Protein S100-P	2	0.254849	0.0911248	0.792107	21.73	20.97	20.6	20.37	20.9	15.64	13.44	16.19	10.78	22.36	18.44	19.49	16.53	11.54	13.75	21.61	21.28	20.85	21.39	21.28	16.74	15.72	17.9	20.81	22.02	19.9	21.7	22.4	21.71	20.59	21.19	20.22	20.71	18.53	14.02	14.92	18.02	17.75	20.77	16.88	20.77	12.84	20.49
S10A2_HUMAN	P29034	Protein S100-A2	3	0.207646	0.171092	0.848877	21.46	21.21	18.07	19.51	21.45	14.99	19.51	19.94	17.9	18.3	20.8	20.96	24.06	16.53	19.86	21.49	20.84	19.93	20.69	20.65	19.26	18.79	19.17	16.63	20.16	19.3	17.82	18.08	21.24	19.87	17.52	19.92	21.09	19.59	16.16	17.24	19.02	15.51	15.33	16.01	19.86	19.93	18.61
S10A6_HUMAN	P06703	Protein S100-A6	2	-0.087028	0.569727	0.898202	17.39	15.83	21.66	21.21	14.12	20.6	12.62	14.64	11.18	17.42	7.55	7.67	11.75	18.99	14.18	14.5	16.39	12.39	12.16	17.03	21.21	17.37	17.47	16.76	16.65	12.06	15.93	5.52	21.28	19.82	18.92	19.68	20.49	12.36	18.87	13.33	18.81	17.4	20.24	20.44	21.71	19.49	17.81
S10A7_HUMAN	P31151	Protein S100-A7	9	0.140694	0.356612	0.866501	23.6	23.36	22.31	18.36	20.7	16.84	18.24	20.66	20.39	19.32	20.98	20.29	18.48	20.64	19.71	23.26	23.54	23.28	22.38	21.46	23	23.17	22.84	23.15	23.7	21.1	19.34	21.27	21.69	21.71	20.59	23.48	23.93	23.07	20.78	22.71	23.14	22.98	22.91	21.94	23.6	21	21.76
S10A8_HUMAN	P05109	Protein S100-A8	8	0.0798903	0.601897	0.932248	19.65	20.84	21.84	20.38	18.37	21.99	15.72	19.56	18.57	20.77	20.24	20.23	16.22	14.95	17.7	22	20.66	20.53	21.48	22.02	22.89	23.05	20.13	21.74	21.53	21.43	18.49	20.06	22.6	22.72	23.67	19.18	20.26	21.34	22.35	20.71	22.48	22.9	23.92	22.45	24.13	21.78	19.54
S10A9_HUMAN	P06702	Protein S100-A9	13	0.249321	0.0986108	0.792107	19.93	23.41	23.4	22.32	21.01	23.21	20.96	21.58	19.36	23.29	21.73	22.76	19.81	18.76	21.57	21.35	24.18	22.75	19.73	20.58	23.82	24.14	21.41	23.61	23.75	23.97	22.96	23.23	23.84	23.26	21.23	22.37	22.85	23.81	23.52	23.89	24.95	25.59	25.12	23.19	23.49	22.42	23.26
S10AA_HUMAN	P60903	Protein S100-A10	3	0.0610596	0.690302	0.948464	21.64	21.34	19.11	19.51	22.15	17.29	19.66	21.15	20.36	22.17	22.36	21.55	21.38	19.55	21.77	22.69	21.66	21.83	20.71	21.04	21.43	21.65	21.37	19.54	21.16	21.28	20.9	20.53	18.5	22.35	20.26	21.15	21.26	21.88	19.85	20.19	20.3	19.62	18.99	22.02	20.59	22.49	20.36
S10AB_HUMAN	P31949	Protein S100-A11	4	0.0654962	0.669046	0.948464	21.37	21.2	21.93	21.04	21.28	20.91	19.98	20.89	20.08	21.55	22.9	20.58	22.25	19.3	21.63	23.4	22.63	21.61	21.04	21.84	22.49	22.09	22.45	22.88	21.11	20.17	20.72	19.38	23.19	22.46	18.96	21.79	21.24	22.42	22.15	23.22	22.73	23.34	22.07	22.76	23.46	22.22	21.65
S10AC_HUMAN	P80511	Protein S100-A12	3	0.079675	0.602879	0.932248	22.21	21.72	21.42	22.08	22.39	21	19.61	21.95	18.72	21.75	18.73	21.61	20.01	21.83	14.36	18.26	16.32	15.69	21.53	21	22.57	20.97	20.8	19.8	19.38	22.37	22.25	22.91	22.81	19.77	22.34	22.3	21.64	22.28	22.27	21.78	20.56	19.45	23.06	22.35	22.78	14.46	22.57
S10AE_HUMAN	Q9HCY8	Protein S100-A14	3	-0.130168	0.394071	0.866501	21.63	21.7	19.79	20.82	22.02	19.78	21.88	21.18	21.25	23.05	21.87	21.4	22.11	20.33	22.04	23.05	22.29	21.61	20.92	21.02	22.25	21.45	21.61	20.96	19.81	22.37	20.99	20.24	17.58	23.02	20.72	21.45	21.59	22.92	21.69	22.19	21.32	21.43	19.86	21.88	21.83	22.02	20.81
S10AG_HUMAN	Q96FQ6	Protein S100-A16	9	0.0300609	0.844591	0.980951	20.93	20.4	19.12	18.49	21.12	17.09	18.38	19.47	19.87	22.07	22.11	20.88	17.76	19.15	20.82	21.02	19.33	20.38	19.62	20.46	20.99	20.77	20.09	17.59	18.22	19.78	20.2	19.65	17.07	21.22	19.18	20.27	20.57	20.14	19.56	20.63	19.17	18.87	17.68	21.33	19.24	20.68	20.75
S1A7A_HUMAN	Q86SG5	Protein S100-A7A	2	0.136639	0.370779	0.866501	23.79	23.42	22.37	20.48	21.75	15.88	16.41	20.74	20.83	19.67	21.58	20.18	16.25	21.15	20.7	23.27	23.64	23.49	22.73	23.52	23.2	23.28	22.48	23.58	24.05	21.47	21.12	22.41	22.34	21.88	22.35	24.43	24.03	23.23	21.61	23.64	23.37	23.55	22.59	22.12	23.78	21.81	22.14
SAA_HUMAN	Q6FG67	Serum amyloid A protein	2	0.113233	0.458935	0.871703	20.11	16.74	11.58	17.85	10.47	18.15	15.01	13.02	15.36	14.8	8.21	5.92	17.16	10.6	17.9	7.78	10.31	14.8	14.09	12.36	11.99	15.07	21.58	14.97	18.59	14.13	14.33	10.84	5.87	15.87	19.58	12.64	18.8	7.21	4.68	11.69	19.46	18.28	13.14	9.28	10.17	12.23	19.34
SBSN_HUMAN	Q6UWP8	Suprabasin	9	0.587145	2.24e-05	0.0108366	18.73	18.91	17.34	18.07	18.08	13.66	16.48	15.19	13.01	15.92	22.55	18.25	13.49	13.58	17.65	16.2	11.1	12.85	16.09	16.41	15.03	18.72	19.37	21.25	21.99	16.27	20.15	15.57	17.06	15.55	13.75	19.22	17.42	14.84	13.98	16.78	18.77	17.31	13.67	15.54	13.27	13.97	16.74
SCEL_HUMAN	O95171	Sciellin	13	-0.0765982	0.616996	0.933206	19.7	19.07	13.85	14.4	18.89	15.06	16.58	16.6	17.18	19.8	19.92	15.97	17.37	13.53	20.3	18.34	17.45	18.48	18.26	19.55	19.17	19.38	17.72	16.56	15.86	18.64	20.17	20.47	15.25	18.99	18.49	19.33	19.72	20.14	18.34	18.73	15.57	15.05	14.64	18.66	17.58	18.92	18.6
SMR3B_HUMAN	P02814	Submaxillary gland androgen-regulated protein 3B	19	0.0877167	0.566666	0.898202	26.53	26.96	26.64	24.09	23.94	25.84	25.8	26.46	26.09	24.3	25	25.83	25.36	24.66	26.35	22.47	26.95	20.12	26.62	23.97	26.68	24.35	23.97	25.19	25.15	25.92	25.98	24.6	26.47	23.58	25.53	25.75	25.65	26.62	26.21	25.58	26.39	26.37	24.91	25.51	22.5	24.15	26.71
SNAA_HUMAN	P54920	Alpha-soluble NSF attachment protein	2	0.0180158	0.906494	0.989513	12.8	9.02	15.41	11.7	18.74	12.87	15.12	15.7	16.36	19.65	19.81	14.81	13.13	17.36	8.23	15.66	18.88	17.06	14.37	13.8	14.43	17.74	15.22	14.48	16.73	17.42	14.63	19.42	9.98	16.77	18.69	18.88	19.57	10.66	16.23	15.02	18.14	14.59	13.16	19.62	20.22	18.94	17.3
SPB13_HUMAN	Q9UIV8	Serpin B13	5	0.196554	0.195634	0.851194	19.46	18.59	17.69	15.73	18.52	17.99	16.12	20.29	19.89	21.05	20.61	20.77	19.02	17.07	19.61	18.77	20.07	19.49	17.08	18.12	20.87	20.65	19.47	20.92	20.71	20.35	18.72	18.99	17.55	19.65	15.63	20.6	19.3	21.08	19.49	19.04	20.65	20.94	19.76	20.77	21.54	20.07	18.64
SPB3_HUMAN	Q8IXI3	Serpin B3	15	0.242133	0.10904	0.810958	20.77	19.72	20.39	20.29	21.83	20.22	18.3	21.07	21.18	21.6	21.85	22.74	19.47	15.7	20.73	20.07	20.32	20.68	20.22	21.18	20.17	19.39	19.76	21.19	21.7	20.52	19.19	18.42	21.36	20.03	18.15	20.5	21.51	19.46	20.21	19.68	21.78	21.21	22.9	20.88	21.97	19.36	19.48
SPB4_HUMAN	P48594	Serpin B4	10	0.255299	0.090535	0.792107	20.77	20.02	20.5	20.49	21.65	19.18	16.4	21.1	21.22	20.97	21.64	22.69	18.5	14.75	20.64	19.61	19.92	20.68	19.75	21.02	19.41	18.73	19.35	20.79	21.48	20.63	19.21	17.24	21.43	19.43	17.37	20.3	21.67	18.11	19.86	18.73	21.53	20.36	22.97	20.88	22.11	18.45	19.65
SPB5_HUMAN	P36952	Serpin B5	8	-0.125853	0.410068	0.866501	17.91	18	17.94	16.27	20.83	17.95	17.45	18.01	19.16	18.71	22.22	20.23	19.16	19.56	19.89	19.14	17.66	19.04	18.92	18.95	19.95	21.26	19	18.46	17.32	21.46	18.71	20.34	21.74	18.48	19.3	18.86	18.73	22.07	18.44	20.39	20.94	20.48	20.6	21.83	21.85	20.72	19.13
SPLC2_HUMAN	Q96DR5	Short palate, lung and nasal epithelium carcinoma-associated protein 2	15	0.155823	0.306715	0.866501	23.63	24.61	24.35	24.94	24.47	23.97	23.51	24.68	24.26	22.75	23.09	24.36	23.86	21.74	24.15	22.03	23.04	22.41	23.88	23.34	24.86	24.24	24.06	24.26	24.2	24.86	25.66	24.88	24.8	25.19	23.4	24.66	24.33	23.49	24.21	23.95	23.85	24.05	25.1	24.38	24.65	24.29	25.62
SPRR3_HUMAN	Q9UBC9	Small proline-rich protein 3	11	0.125679	0.410722	0.866501	24.7	24.84	23.1	23.15	24.53	21.2	22.05	23.3	22.7	22.99	23.75	24.42	23.51	23.81	24.18	25.3	24.36	24.17	22.36	24.55	24.12	23.7	23.91	23.26	24.04	23.77	23.63	23.8	25.59	24.59	22.65	23.84	24.22	24.43	23.5	23.97	24.76	24.82	24.22	24.5	23.59	23.92	22.64
STAT_HUMAN	P02808	Statherin	9	-0.0466507	0.760898	0.953071	24.8	25	24.44	22.33	20.63	25.06	24.89	24.92	24.42	18.62	21.23	22.13	23.87	23.28	24.4	19.46	22.24	18.06	22.35	19	23.23	24.38	20.37	22.62	23.09	23.55	24.69	20.77	22.01	22.13	24.86	24.75	24.79	24.61	24.16	24.13	25.22	25.1	20.93	23.71	13.96	23.45	25.51
STOM_HUMAN	P27105	Erythrocyte band 7 integral membrane protein	2	0.0786532	0.607552	0.932653	15.98	19.17	20.22	20.65	10.7	20.04	11.57	12.87	8.11	10.9	15.08	13.25	10.58	10.24	11.59	6.48	19.86	16.94	19.45	18.51	10.17	12.14	13.84	20.08	20.43	10.99	19.16	20.71	19.54	19.43	14.11	15.4	3.42	14.11	15.25	8.19	19.98	18.21	20.8	17.34	21.64	13.23	12.77
TAGL2_HUMAN	P37802	Transgelin-2	7	0.246155	0.103105	0.792107	18.9	19.5	17.27	18.41	20.26	18.58	16.82	20.02	18.55	18.7	19.48	19.42	15.21	16.79	20.55	18.38	19.15	17.83	19.15	18.98	19.84	20.22	19.69	20.54	21.05	19.81	17.87	20.91	20.98	19.56	20.24	20.43	19.7	18.66	18.69	18.43	20.93	20.37	17.81	19.53	19.06	18.85	18.51
TALDO_HUMAN	P37837	Transaldolase	8	-0.0822666	0.591099	0.925864	18.76	18.62	19.28	20.67	18.28	19.6	14.85	18.41	18.21	20.06	17.08	18.95	16.97	14.85	17.08	18.67	17.22	19.86	20.37	20.25	16.9	16.2	14.65	18.82	19.16	18.64	18.9	17.46	20.94	20.27	18.26	19.73	17.55	17.21	18.39	17.27	21.08	19.66	21.09	20.04	21.46	19.89	15.9
TBA1A_HUMAN	Q71U36	Tubulin alpha-1A chain	14	0.0590022	0.70024	0.948464	21.84	21.61	18.71	20.25	21.39	18.59	20.25	21.42	21.07	21.35	21.32	20.65	18.12	19.99	21.37	20.37	21.6	20.72	19.46	19.86	21.75	22.14	21.47	18.78	20.47	21.7	20.67	20.19	19.8	22.09	20.47	21.36	21.76	21.92	20.84	20.73	19.59	18.4	18.25	21.62	20.56	20.91	20.2
TBA1B_HUMAN	P68363	Tubulin alpha-1B chain	15	0.0320851	0.834268	0.977879	21.85	21.63	18.9	20.35	21.39	18.57	20.2	21.4	20.71	20.85	21.28	20.16	18.39	20.01	21.35	19.81	21.57	19.62	19.45	19.74	21.05	21.43	21.5	19.01	20.04	21.28	19.87	20.09	19.66	21.58	20.47	21.32	21.76	21.92	20.85	20.68	19.7	18.53	18.5	21.65	20.55	20.51	20.17
TBA1C_HUMAN	Q9BQE3	Tubulin alpha-1C chain	15	0.034758	0.82068	0.972591	21.82	21.61	19.11	20.46	21.37	18.84	20.31	21.39	20.77	20.91	21.3	20.27	18.67	20.14	21.37	19.98	21.55	19.8	19.62	19.87	21.06	21.44	21.53	19.21	20.17	21.3	20	20.21	19.82	21.56	20.55	21.32	21.74	21.83	20.9	20.77	19.82	18.81	18.77	21.63	20.61	20.6	20.31
TBA3C_HUMAN	Q13748	Tubulin alpha-3C/D chain	12	0.0456258	0.766001	0.953071	21.76	21.52	18.06	20.6	21.28	17.98	19.86	21.47	20.97	21.24	21.35	20.55	17.87	20.03	21.42	20.29	21.45	20.53	18.99	19.47	21.73	22.23	21.24	18.22	20.39	21.67	20.21	19.68	19.3	22.18	20.55	21.39	21.78	21.86	20.88	20.59	19.33	18.58	18.01	21.69	21.23	20.89	19.78
TBA3E_HUMAN	Q6PEY2	Tubulin alpha-3E chain	9	-0.0710122	0.642973	0.948464	22.5	21.94	18.99	20.7	22.01	18.87	21.03	21.53	21.24	21.24	21.26	20.47	18.27	21.52	21.57	20.43	21.88	21.35	20.12	20.35	22.07	22.4	21.64	18.25	20.78	21.89	21.71	21.94	19.03	22.42	21.81	21.64	22.01	22.12	21.18	20.92	19.8	19.52	19.05	21.9	21.4	21.21	21.44
TBA4A_HUMAN	P68366	Tubulin alpha-4A chain	13	0.161935	0.287893	0.866501	21.48	21.32	18.19	20.1	21.07	17.22	20.02	21.29	20.43	21.16	21.62	19.67	18.73	17.63	21.41	18.16	20.56	17.84	18.68	18.79	20.69	21.17	20.99	19.19	19.76	21.09	19.09	19.4	19.08	20.7	19.69	21.16	21.59	21.57	20.62	20.48	19.05	17.42	18.08	21.49	21.03	20.31	19.84
TBA4B_HUMAN	Q9H853	Putative tubulin-like protein alpha-4B	2	-0.0716643	0.639918	0.948464	22.39	22.17	21.59	21.88	22.02	20.52	21.23	21.82	19.71	19.43	21.69	19.16	21.69	20.91	21.93	18.84	21.86	15.77	20.97	20.46	18.77	18.93	21.95	21.3	18.93	20.11	17.53	20.72	20.47	19.88	21.43	21.57	22.18	22.07	21.42	20.84	21.1	20.64	21.54	22.04	20.91	19.5	20.88
TBA8_HUMAN	Q9NY65	Tubulin alpha-8 chain	9	0.162635	0.285784	0.866501	21.58	21.69	19.27	21.41	21.1	18.84	19.87	21.71	20.47	20.85	21.79	20.38	19.86	19.29	21.66	19.64	21.45	18.05	19.12	19.44	20.47	21.01	21.48	20.22	19.8	21.09	18.16	18.47	20.55	21.11	20.18	21.51	21.88	21.57	21.13	20.87	19.88	19.18	18.32	21.75	21.21	20.35	19.13
TBB1_HUMAN	Q9H4B7	Tubulin beta-1 chain	4	-0.0177771	0.907727	0.989513	21.43	21.25	16.73	17.2	19.94	17.69	15.04	19.14	18.52	20.81	18.79	15.2	16.95	15.6	19.77	17.55	19.95	20.16	18.24	20.38	19.86	21.91	20.65	16.81	17.28	18.63	19.49	20.78	16.23	19.8	19.08	20.63	21.36	19.43	17.8	18.3	18.01	16.98	15.58	19.28	20.59	18.41	19.37
TBB2A_HUMAN	Q13885	Tubulin beta-2A chain	18	-0.0585785	0.702293	0.948464	20.83	20.46	19.07	18.64	20.25	20.18	19.38	20.69	20.38	21.58	20.79	19.12	19.82	17.95	20.9	19.44	21.09	21	19	20.09	21.12	22.15	21.25	18.38	18.47	20.59	19.55	20.34	18.51	21.26	19.66	21.18	21.51	21.04	19.9	20.4	19.84	19.14	18.05	20.44	21.01	20.22	19.48
TBB3_HUMAN	Q13509	Tubulin beta-3 chain	12	-0.024911	0.870967	0.984439	21.17	21.47	19.16	18.91	20.52	19.19	19.1	20.68	20.34	21.47	20.47	18.88	19.47	17.93	21.18	19.02	20.98	20.92	19.39	20.44	21.08	22.07	21.15	17.75	18.56	20.41	20.29	20.78	18.07	21.18	20.06	21.11	21.57	21.08	19.79	20.01	20.09	18.83	17.68	20.23	21.07	19.97	19.8
TBB5_HUMAN	P07437	Tubulin beta chain	16	-0.00623208	0.967591	0.990093	21.34	21.02	18.92	18.71	20.71	19.29	19.09	20.39	19.9	21.54	20.78	18.38	19.36	18.35	20.61	18.75	21.02	20.72	19.19	20.21	21	22.01	20.85	17.57	18.61	20.56	20.12	20.73	18.39	21.14	20.15	20.91	21.6	21.02	19.75	20.04	19.11	18.63	17.38	20.55	20.58	20.09	19.45
TBB8B_HUMAN	A6NNZ2	Tubulin beta-8 chain B	5	-0.0171836	0.910795	0.989513	21.63	21.39	17.42	18.23	20.42	18.73	16.51	19.72	19.12	21.03	19.46	16.53	18.02	16.96	20.15	18.45	20.4	20.38	18.17	20.46	20.14	21.99	20.82	17.62	18.06	19.22	19.34	20.75	17.3	20.3	19.52	20.7	21.57	19.91	18.38	19.31	18.58	17.75	16.75	19.7	20.74	19.09	19.7
TBB8_HUMAN	Q3ZCM7	Tubulin beta-8 chain	6	-0.00889556	0.953753	0.990093	21.73	21.45	18.01	18.52	20.45	19.22	17.34	19.96	19.45	21.14	19.83	17.25	18.6	17.56	20.43	18.77	20.52	20.54	18.53	20.46	20.44	22.01	21	18.16	18.55	19.67	19.67	20.9	17.65	20.58	19.83	20.78	21.64	20.19	18.98	19.66	18.97	18.19	17.32	20.03	20.83	19.34	20.02
TCO1_HUMAN	P20061	Transcobalamin-1	6	0.0885364	0.563031	0.898202	20.52	20.55	20.25	20.92	21.68	19.12	20.07	21.48	20.64	21.24	21.39	22.49	21.59	18.28	19.5	20	18.78	20.43	19.35	18.81	19.41	17.13	20.34	21.34	21.08	19.79	19.39	18.09	21.17	20.48	19.3	22.17	21.92	20.48	20.82	21.54	21.93	21.52	22.14	21.08	22.05	21.39	18.49
TCPB_HUMAN	P78371	T-complex protein 1 subunit beta	3	0.262017	0.0820834	0.760251	16.48	13.16	15.25	14.41	15.8	15.03	12.16	15.36	11.52	17.37	17.23	13.78	13.03	10.3	11.76	13.66	15.87	18.1	12.43	14.62	18.48	19.08	15.42	14.14	16.34	16.26	12.77	17.03	15.3	19.2	12.79	15.74	12.74	17.77	16.24	13.01	12.62	14.04	11.22	17.06	14.87	14.89	18.51
TCPQ_HUMAN	P50990	T-complex protein 1 subunit theta	2	0.0553186	0.718158	0.953071	17.61	18.89	15.01	11.96	18.67	13.43	13.52	17.18	13.5	20.17	19.36	13.44	15.58	14.52	15.02	14.5	13.51	18.22	16.82	15.72	16.41	19.79	14.96	16.76	14.61	15.53	17.83	20	13.69	12.06	14.26	14.3	18.05	18.11	7.94	16.87	11.35	16.18	17.31	17.98	18.22	17.12	14.37
TCTP_HUMAN	P13693	Translationally-controlled tumor protein	2	0.424825	0.00362828	0.351217	20.01	20.26	17.09	15.66	17.59	14.76	16.5	17.34	17.12	19.93	20.47	19.46	16.57	14.02	19.44	18.56	18.98	19.24	17.8	17.85	19.46	20.07	19.68	19.6	19.59	19.41	18.71	18.57	19.97	19.28	16.58	19.47	19.6	19.64	19.04	18.85	19.09	17.67	15.27	19.23	19.67	16.56	16.44
TERA_HUMAN	P55072	Transitional endoplasmic reticulum ATPase	8	0.150121	0.32497	0.866501	19.28	18.09	13.58	14.39	16.89	13.31	16.13	16.61	15.85	20.3	19.61	16.06	14.95	16.94	15.78	14.92	17.47	16.16	18.02	17.73	17.15	16.87	15.99	14.63	18.14	18.11	18.93	19.83	14.28	17.44	16.26	16.07	18.87	16.72	14.76	14.71	15.28	13.64	14.3	17.76	17.4	16.65	18.41
TGM1_HUMAN	P22735	Protein-glutamine gamma-glutamyltransferase K	16	-0.126883	0.406215	0.866501	19.68	18.65	16.83	14.61	19.86	14.84	16.15	19.02	17.77	18.6	19.9	14.63	14.63	14.36	17.44	19.22	18.98	19.58	17.79	17.62	19.52	20.02	18.95	14.9	14.48	18.35	16.77	18.69	15.28	19.59	16.72	18.87	20.7	18.51	18.6	17.85	16.08	14.21	15.46	19.61	20.22	19.67	17.22
TGM3_HUMAN	Q08188	Protein-glutamine gamma-glutamyltransferase E	45	0.169046	0.266956	0.855674	23.51	23.47	22.23	21.53	23.26	22.56	21.55	22.5	21.75	23.26	23.05	22.59	22.68	21.55	22.8	22.83	22.71	23.25	22.09	22.54	22.97	22.76	22.87	23.32	23.58	22.88	21.94	22.54	22.79	22.53	22.34	22.95	22.93	23.41	22.13	22.92	23.14	23.64	24.24	22.74	23.37	22.5	22.92
THIO_HUMAN	P10599	Thioredoxin	9	0.213158	0.159758	0.848877	21.65	21.56	21.96	20.3	21.65	22.04	21.82	22.23	21.63	22.69	22.93	23.12	20.71	20.9	22.99	22.7	22.58	22.62	20.06	21.75	22.74	22.44	22.68	23.87	23.53	22.79	22.24	22.35	23.83	21.77	21.76	22.41	21.92	22.88	22.45	22.89	23.57	23.73	23.97	22.51	23.13	21.46	21.54
TIMP1_HUMAN	P01033	Metalloproteinase inhibitor 1	2	0.0728765	0.634255	0.946697	19.66	14.84	17.74	15.38	17.87	15.94	13.07	17.72	17.42	18.04	19.66	20.94	16.43	15.96	17.9	17.76	18.03	20.39	19.14	17.07	15.12	13.29	16.42	17.66	20.76	17.61	13.19	20.67	19.57	22	20.14	16.64	21.01	17.73	17.3	15.06	17.4	16.54	19.2	16.66	15.63	18.73	17.92
TKT_HUMAN	P29401	Transketolase	13	0.279827	0.062646	0.72785	21.22	20.89	20.74	21.48	21.25	21.68	19.23	21.24	20.34	21.7	20.8	21.33	19.62	18.22	20.88	21.02	20.87	21.14	20.2	19.9	21.19	21.29	20.62	21.24	21.49	21.72	20.98	21.35	22.1	20.53	21.11	20.62	20.39	20.71	20.45	20.57	21.42	20.61	21.73	20.56	21.81	20.77	20.44
TM11B_HUMAN	Q86T26	Transmembrane protease serine 11B	2	0.2927	0.0510327	0.692119	12.54	3.83	8.74	12.56	15.58	-8.16	3.49	9.6	-8.45	21.32	21.4	4.27	18.25	10.96	9.7	13.18	10.29	17.44	10.42	17.05	19.3	23.83	15.63	17.4	19.07	15.84	19.73	20.64	11.58	20.56	19.05	19.24	10.42	9.21	12.81	7.18	14.68	-2.78	5.09	15.77	7.04	20.31	0.17
TM11D_HUMAN	O60235	Transmembrane protease serine 11D	2	0.21327	0.159534	0.848877	17.9	18.75	15.52	12.99	18.91	14.15	15.09	16	13.61	20.45	20.16	12.63	14.85	11.87	17.26	10.75	15.35	16.49	12.2	15.66	16.27	19.34	18.42	20.2	20.29	18.26	17.53	15.38	11.61	16.15	14.8	19.19	19.8	17.67	15.49	16.78	14.86	15	14.03	19.26	21.32	17.37	14.96
TMSL3_HUMAN	A8MW06	Thymosin beta-4-like protein 3	2	0.060385	0.693555	0.948464	23.46	20.88	21.8	22.13	19.46	22.85	19.02	14.42	15.47	17.63	14.18	20.15	15.3	18.78	17.77	23.72	22.33	19.34	17.66	16.78	19.2	18.84	20.25	21.49	22.34	21.65	12.6	9.19	22.05	20.61	19.65	20.97	18.1	15.58	19.11	18.14	21.56	17.75	22.01	17.19	21.89	20.83	15.88
TPIS_HUMAN	P60174	Triosephosphate isomerase	9	0.263421	0.0803979	0.760251	21.78	21.25	21.19	20.72	21.66	20.41	19.54	20.95	20.74	21.64	21.36	21.42	20.34	19.53	21.29	21.48	21.12	21.1	20.69	21.07	21.41	21.04	21.28	22.14	22.47	21.46	20.94	21.8	22.37	21.51	21.8	21.48	21.21	21.79	21.08	21.87	22.05	21.5	22.59	21.27	22.42	21.05	20.88
TPM1_HUMAN	Q96IK2	Tropomyosin alpha-1 chain	2	0.00813493	0.957703	0.990093	18.08	20.61	21.37	20.7	19.54	21.67	19.39	20.01	21	19.7	19.04	17.97	15.87	19.21	21.03	21.41	19.76	20.53	19.39	18.13	21.43	21.33	21.18	19.11	20.82	21.47	18.05	21.1	21.48	21.77	19.63	19.64	20.12	21.35	18.76	18.32	17.49	18.95	23.51	20.13	18.54	20.05	20.1
TPM2_HUMAN	P07951	Tropomyosin beta chain	3	-0.0285044	0.852547	0.984439	18.58	20	17.05	19.32	19.48	20.78	19.09	18.41	17.74	20.27	18.76	17.19	16.62	18.03	18.97	16.2	17.84	19.09	16.02	18.06	19.46	17.38	20.33	17.92	16.34	20.08	18.56	20.92	18.81	15.02	19.53	18.89	19.6	18.46	14.22	17.48	15.27	17.02	19.52	20.01	17.08	19.94	19.94
TPM3_HUMAN	P06753	Tropomyosin alpha-3 chain	4	-0.0543591	0.72285	0.953071	13.21	16.28	17.56	17.7	18.33	16.53	18.08	12.31	13.26	13.14	13.02	16.09	21.27	11.39	19.79	18.73	14.94	16.12	11.86	17.44	17.61	18.84	19.79	16.35	14.89	16.58	17.65	17.92	18.07	17.48	18.14	18.8	18.83	20.3	16.33	16.29	16.64	12.82	15.57	19.43	17	18.83	18.36
TPM4_HUMAN	Q9UCS3	Tropomyosin alpha-4 chain	5	-0.0614962	0.688199	0.948464	14.48	16.78	15.73	17.47	18.54	17.03	18.16	12.89	12.85	14.79	14.05	16	20.64	12.25	18.8	16.14	14.75	16.14	11.34	17.54	17.19	16.97	19.56	16.19	13.39	16.73	18.03	18.45	17.15	14.29	18.38	18.51	18.77	18.78	14.09	16.2	15.48	12.89	14.76	19.5	16.44	19.01	18.61
TRFE_HUMAN	P02787	Serotransferrin	20	0.295879	0.0484505	0.692119	21.95	21.53	21.64	20.81	20.43	17.83	19.87	17.02	18.63	18.66	21.39	20.35	15.44	17.59	18.42	20.13	21.29	22.23	21.62	20.89	20.11	20.08	21.31	20.66	21.5	20.55	21.87	20.29	20.62	20.68	20.11	21.07	22.43	15.26	20.57	17.09	19.39	19.57	19.32	20.39	20.82	20.26	19.04
TRFL_HUMAN	Q8TCD2	Lactotransferrin	34	0.0295531	0.847185	0.980951	23.04	22.88	22.36	23.56	23.3	22.92	23.84	23.4	23.39	22.82	21.56	22.67	23.45	22.37	23.64	22.32	22.49	21.92	22.64	22.92	21.94	22.84	24.55	23.03	23.1	23.45	22.64	22.6	23.64	22.65	24.17	23.91	25.09	22.55	22.7	22.86	23.47	23.14	22.58	21.91	22.95	23.23	23.44
TRI29_HUMAN	Q14134	Tripartite motif-containing protein 29	8	0.14341	0.347307	0.866501	20.15	17.34	15.82	15.57	16.39	16	14.96	16.91	17.2	20.81	19.52	17.26	15.01	15.38	20.1	16.91	18.26	18.48	16.03	17.63	18.78	21.31	18.76	18.29	16.78	19.23	17.37	19.3	14.87	16.18	16.15	19.19	19.72	17.43	18.68	17.52	14.55	15.39	16.64	19.79	18.43	19.6	17.75
TTHY_HUMAN	P02766	Transthyretin	3	0.352821	0.0174445	0.691001	21.19	21.42	20.21	21.33	18.96	17.81	14.58	13.98	19.27	19.23	20.97	19.59	11.93	13.84	13.95	18.46	19.07	20.75	22.33	19.33	17.22	18.69	16.82	21.88	22.04	18.03	20.9	14.56	19.32	21.26	19.03	18.69	20.32	13.95	16.17	15.59	18.6	17.76	17.6	16.74	13.25	12.94	16.09
TYB4_HUMAN	P62328	Thymosin beta-4	2	0.060385	0.693555	0.948464	23.46	20.88	21.8	22.13	19.46	22.85	19.02	14.42	15.47	17.63	14.18	20.15	15.3	18.78	17.77	23.72	22.33	19.34	17.66	16.78	19.2	18.84	20.25	21.49	22.34	21.65	12.6	9.19	22.05	20.61	19.65	20.97	18.1	15.58	19.11	18.14	21.56	17.75	22.01	17.19	21.89	20.83	15.88
TYPH_HUMAN	P19971	Thymidine phosphorylase	2	0.122592	0.4224	0.870123	18.44	16.01	12.92	14.42	8.77	13.83	9.65	9.66	12.5	14.52	14.28	10.79	14.88	15.82	16.52	10.97	8.82	13.63	11.89	12.16	16.7	15.72	16.19	17.15	18.06	16.36	14.52	15.33	5.23	15.94	15.09	16.23	12.03	20.03	13.34	9.33	12.55	13.86	13.41	17.87	19.17	13.57	16.29
UBA1_HUMAN	P22314	Ubiquitin-like modifier-activating enzyme 1	3	0.0340054	0.824501	0.972645	16.95	16.27	15.01	12.27	17.03	18.04	15.33	16.61	19.06	20.06	19.45	16.44	14.77	14.7	17.02	15.66	15.18	17.75	14.7	15.1	18.3	20.02	18.69	16.2	16.3	19.41	18.67	19.81	17.68	17.3	17.64	20.06	19.8	18.07	17.63	14.44	16.21	13.07	15.61	15.73	20.09	18.71	18.91
VAT1_HUMAN	Q99536	Synaptic vesicle membrane protein VAT-1 homolog	2	0.220938	0.144708	0.848877	12.15	18.63	19.88	19.95	19.03	18.16	16.39	17.12	14.28	19.5	20.56	15.14	12.56	16.21	18.31	17.25	19.46	19.57	17.49	17.5	18.82	19.51	17.31	16.01	19.46	18.38	18.31	18.43	20.32	20.48	11.88	14.92	19.8	16.04	17.95	18.15	18.51	19.52	17.51	17.16	18.45	18.74	18.16
VATA_HUMAN	P38606	V-type proton ATPase catalytic subunit A	2	0.235957	0.118657	0.810958	11.05	13.33	11.1	7.2	5.67	10.18	9.3	11.59	11.17	12.99	13.31	10.3	12.83	11.42	13.31	12.61	10.16	10.92	13.51	12.31	15.75	18.89	11.4	17.2	15.56	16.28	10.66	12.53	17.52	14.39	9.96	12.41	16.32	11.17	15.14	12.73	15.63	15.87	12.36	11.11	19.07	17.44	13.53
VDAC1_HUMAN	P21796	Voltage-dependent anion-selective channel protein 1	2	-0.011826	0.938543	0.990093	20.63	20.05	16.26	16.79	20.08	16.38	18.91	19.55	19.61	20.5	20.94	19.6	15.92	16.65	19.11	19.36	19.88	20.41	20.02	20.17	20.15	20.85	20.31	16.84	19.5	19.5	20.09	19.6	16.45	18.09	19.02	19.58	20.56	20.94	19.73	19.91	17.6	16.61	16.33	20.57	20.05	20.76	20.33
VDAC2_HUMAN	P45880	Voltage-dependent anion-selective channel protein 2	5	-0.00156243	0.991873	0.993926	16.5	19.09	12.79	16.04	18.84	17.48	16.5	20.7	17.95	21.11	21.56	17.33	17.27	15.14	20.27	17.37	19.79	18.1	17.81	20.34	20.34	21.15	19.37	17.17	17.48	20.3	19.11	18.27	16.56	19.01	15.31	18.96	20.32	20.03	19.66	18.14	14.77	15.53	16.05	19.65	18.78	19.11	15.85
VIME_HUMAN	Q96ML2	Vimentin	13	0.0856013	0.576093	0.90529	19.11	17.66	19.73	20.62	18.87	17.35	14.81	16.82	18.09	17.45	16.69	17.58	16.59	16.34	16.78	20.09	19.94	18.81	20.34	19.18	18.02	16.69	17.54	19.98	21.1	19.85	18.79	16.87	20.38	20.31	18.07	19.05	16.03	16.51	16.47	14.32	20.13	17.94	19.68	16.13	21.33	20.82	16.49
VTDB_HUMAN	P02774	Vitamin D-binding protein	2	-0.0381424	0.803549	0.969869	20.38	20.46	22.01	21.76	17.07	20.54	19.92	18.52	13.45	14.92	19.34	19.11	18.79	16.43	12.17	19.47	20.67	21.4	20.01	18.14	18.03	10.79	17.36	20.72	16.4	19.55	17.78	11.54	19.35	22.19	19.39	19.84	20.73	13.5	16.68	19.04	20.63	20.03	17.46	18.72	20.03	19.72	16.54
WDR1_HUMAN	O75083	WD repeat-containing protein 1	6	0.224601	0.137996	0.848877	18.63	19.96	18.61	18.63	18.3	14.36	16.17	16.6	16.43	19.65	20.38	15.34	15.12	16.84	19.6	15.4	15.48	17.19	18.19	16.95	19.31	19.89	12.43	17.04	19.08	19.12	17.34	20.03	16.82	21.02	18.07	18.75	19.64	19.25	16.68	15.54	18.91	17.23	14.35	19.28	16.28	17.48	16.92
YI016_HUMAN	A6NKZ8	Putative tubulin beta chain-like protein ENSP00000290377	5	-0.0171836	0.910795	0.989513	21.63	21.39	17.42	18.23	20.42	18.73	16.51	19.72	19.12	21.03	19.46	16.53	18.02	16.96	20.15	18.45	20.4	20.38	18.17	20.46	20.14	21.99	20.82	17.62	18.06	19.22	19.34	20.75	17.3	20.3	19.52	20.7	21.57	19.91	18.38	19.31	18.58	17.75	16.75	19.7	20.74	19.09	19.7
ZA2G_HUMAN	P25311	Zinc-alpha-2-glycoprotein	13	0.011079	0.942418	0.990093	23.92	24.16	24.16	24.59	24.43	24.37	24.09	25	25.07	24.89	24.82	25.06	24.55	23.62	23.67	24.89	24.44	24.18	24.36	24.24	24.49	24.36	23.96	24.13	24.14	24.94	24.03	23.29	24.73	24.15	25.01	24.85	24.97	24.57	24.37	24.3	24.21	24.37	24.13	23.82	24.68	24.36	25.2
ZG16B_HUMAN	Q96DA0	Zymogen granule protein 16 homolog B	15	-0.108173	0.479376	0.878799	23.56	24.34	23.95	24.74	25.65	24.68	23.54	25.67	24.74	24.79	23.36	25.72	25.3	22.68	25.23	26.3	25.26	24.31	24.92	25.35	24.54	24.22	24.59	23.21	23.2	24.5	24	23.62	25.09	23.6	22.98	24.61	24.82	24.35	23.52	24.95	25.3	24.83	25.87	22.97	24.07	23.82	24.52
ZN185_HUMAN	O15231	Zinc finger protein 185	4	-0.0966825	0.527519	0.89638	20.1	13.86	14.42	15.72	18.25	15.41	15.19	10.71	12.15	12.46	18.88	14.62	11.58	16.14	17.38	15.59	17.13	13.01	16.76	17.84	16.14	18.32	18.08	11.31	5.17	15.01	13.33	16.4	13.99	16.31	15.25	14.76	16.33	15.64	11.22	15.74	12.57	13.58	8.78	15.38	15.63	17.33	14.66
[truncated: 2 more columns]

## Sheet: DRC
Protein	UniProt	Description	Corr	Pvalue	AdjPval	C03_0	C03_15	C04_0	C04_15	C05_0	C05_15	C06_15	C07_0	C07_15	C09_0	C09_15	C12_0	C12_15	C14_0	C14_15	C17_0	C17_15	C18_0	C18_15	C19_0	C19_15
1433B_HUMAN	P31946	14-3-3 protein beta/alpha	-0.0673953	0.771615	0.904532	22.41	18.71	22.55	21.62	21.7	20.82	21.84	23.05	21.23	20.63	21.86	22.82	22.68	23.56	21.97	22.91	22.73	23.24	21.91	22.94	21.84
1433E_HUMAN	P62258	14-3-3 protein epsilon	-0.187733	0.415126	0.663191	23.18	20.22	23.42	22.96	23.23	22.44	21.48	23.35	22.43	24.29	22.47	23.65	23.29	22.87	22.58	21.76	22.58	23.24	22.68	22.79	22.33
1433F_HUMAN	Q04917	14-3-3 protein eta	-0.00628369	0.978434	0.988398	24.56	23.61	24.94	24.89	25.17	24.45	23.86	25.02	24.66	24.34	24.72	25.2	24.86	24.12	23.73	24.5	24.46	24.96	24.22	24.65	24.82
1433G_HUMAN	P61981	14-3-3 protein gamma	-0.0663551	0.775052	0.904532	21.59	20.5	21.96	22.76	22.21	20.96	20.48	22.84	21.08	21.5	21.55	21.79	22.64	23.95	21.57	21.27	22.65	23.12	21.57	22.94	21.95
1433S_HUMAN	P31947	14-3-3 protein sigma	0.0736233	0.751125	0.899899	23.93	22.05	24.45	23.83	24.19	23.63	22.49	24.27	24.06	23.36	24.11	24.28	23.88	23.33	23.5	24.44	23.72	24.39	23.47	23.9	24.21
1433T_HUMAN	P27348	14-3-3 protein theta	0.197998	0.389598	0.663191	22.56	21.5	22.93	23.31	23.33	22.76	22.07	23.08	22.37	21.03	21.42	23.25	23.09	20.68	22.3	23.35	22.93	23.31	22.74	23.21	23.1
1433Z_HUMAN	Q6NUR9	14-3-3 protein zeta/delta	0.154171	0.504615	0.742697	23.18	22.12	24.09	23.28	23.14	22.18	21.97	23.59	23.36	23.35	23.15	24	23.74	22.34	23.24	23.54	23.58	24.25	23.5	23.91	23.53
6PGD_HUMAN	P52209	6-phosphogluconate dehydrogenase, decarboxylating	-0.189996	0.409423	0.663191	21.6	20.11	21.76	20.67	21.25	20.12	19.69	22.3	19.25	20.8	20.71	21.87	20.97	21.31	21.85	21.05	20.56	20.22	21.63	20.92	20.4
A1AG1_HUMAN	P02763	Alpha-1-acid glycoprotein 1	0.361678	0.107177	0.500985	20.35	23.27	17.61	20.68	19.58	20.74	19.49	23.38	18.45	19.98	16.84	22.92	21.14	21.28	22.31	23.34	22.14	22.49	21.8	23	22.7
A1AG2_HUMAN	P19652	Alpha-1-acid glycoprotein 2	0.252268	0.269934	0.604588	18.27	16.29	17.95	19.54	21.82	21.07	16.74	20.51	18.77	20.79	15.01	19.24	19.11	19.13	20.77	20.64	19.88	22.38	20.91	18.8	21.7
A1AT_HUMAN	Q86U18	Alpha-1-antitrypsin	0.212572	0.354908	0.663191	15.92	17.37	14.39	19.92	17.81	19.12	14.76	18.28	21.12	16.39	15.13	18.97	16.43	16.74	19.11	17.79	19.53	18.47	17	21.27	24.76
A2MG_HUMAN	P01023	Alpha-2-macroglobulin	0.331006	0.142739	0.540446	18.62	19.14	13.99	18.05	15.45	18.36	15.91	19.45	17.55	13.73	13.13	14.77	12.67	11.61	13.53	16.62	17.39	18.34	15.43	15.53	23.45
A2ML1_HUMAN	A8K2U0	Alpha-2-macroglobulin-like protein 1	0.0221834	0.923963	0.971163	21.68	19.96	22.33	21.77	23.2	22.17	21.02	23.79	22.37	22.34	22.38	23.49	23.08	22.39	22.6	22.41	21.6	23.57	22.5	23.14	22.55
AACT_HUMAN	Q6NSC9	Alpha-1-antichymotrypsin	0.0693751	0.765085	0.903529	11.07	9.43	11.97	14.03	9.76	18.92	8.27	14.59	15.72	13.6	18.14	13.58	4.48	18.01	21.91	19.6	22.97	8.76	19.69	16.52	23.76
ACTA_HUMAN	P62736	Actin, aortic smooth muscle	0.140852	0.542532	0.770297	25.88	25.38	25.58	24.65	25.27	25.06	24.59	25.69	24.04	24.59	25.46	25.58	25.24	25.71	25.22	26.15	25.27	25.65	25.69	25.21	24.74
ACTB_HUMAN	Q96HG5	Actin, cytoplasmic 1	-0.103697	0.654652	0.854493	25.41	25.56	25.05	23.66	24.09	23.11	24.11	24.67	22.27	24.3	24.69	24.95	24.18	25.29	24.93	25.32	23.7	24.54	24.89	24.37	23.99
ACTBL_HUMAN	Q562R1	Beta-actin-like protein 2	-0.0937255	0.686142	0.870924	25.08	26.63	24.79	22.78	22.54	23.22	23.73	24.77	21.66	23.19	24.14	24.7	24.33	25.2	24.64	24.69	23.44	23.89	24	23.69	23.18
ACTBM_HUMAN	Q9BYX7	Beta-actin-like protein 3	0.0693896	0.765037	0.903529	26.01	25.13	25.43	24.52	25.6	24.49	24.3	24.92	23.35	24.6	25.2	25.43	25.29	25.4	25.1	25.93	25.12	25.35	25.53	24.78	24.66
ACTC_HUMAN	P68032	Actin, alpha cardiac muscle 1	0.0990164	0.669366	0.860119	25.78	25.32	25.52	24.77	25.22	24.8	24.59	25.36	24.21	24.6	25.51	25.56	25.2	25.62	25.17	26	25.22	25.31	25.64	25.2	24.76
ACTG_HUMAN	P63261	Actin, cytoplasmic 2	-0.103697	0.654652	0.854493	25.41	25.56	25.05	23.66	24.09	23.11	24.11	24.67	22.27	24.3	24.69	24.95	24.18	25.29	24.93	25.32	23.7	24.54	24.89	24.37	23.99
ACTH_HUMAN	P63267	Actin, gamma-enteric smooth muscle	0.140852	0.542532	0.770297	25.88	25.38	25.58	24.65	25.27	25.06	24.59	25.69	24.04	24.59	25.46	25.58	25.24	25.71	25.22	26.15	25.27	25.65	25.69	25.21	24.74
ACTN1_HUMAN	P12814	Alpha-actinin-1	-0.188515	0.41315	0.663191	22.12	20.76	22.61	21.79	22.26	20.97	20.56	22.51	20.63	22.1	21.69	22.43	22.05	21.38	22.06	21.56	20.49	22.04	22.13	21.99	20.71
ACTN2_HUMAN	P35609	Alpha-actinin-2	-0.270715	0.235255	0.601477	22.45	19.57	22.29	21.09	21.89	20.63	19.52	22.39	20.39	21.7	22	22.14	21.93	20.7	21.89	20.07	18.13	22.23	21.67	21.38	20.29
ACTN3_HUMAN	Q08043	Alpha-actinin-3	-0.276474	0.225051	0.590381	22.62	19.76	22.45	22.15	21.8	20.69	19.33	22.54	19.87	20.95	22.11	22.12	22.3	20.78	21.99	20.84	18.76	20.37	22.11	21.13	19.24
ACTN4_HUMAN	O43707	Alpha-actinin-4	-0.348555	0.121502	0.506579	21.38	18.58	21.61	20.77	21.14	17.35	17.92	20.79	16.63	19.56	20.34	21.01	20.68	19.84	21.3	18.54	18.53	21.02	19.62	19.93	18.1
ACTS_HUMAN	P68133	Actin, alpha skeletal muscle	0.0932615	0.68762	0.870924	25.86	25.44	25.67	24.97	25.2	24.98	24.81	25.49	24.58	24.98	25.91	25.58	25.2	25.66	25.32	26.03	25.36	25.47	25.66	25.43	24.96
ADH7_HUMAN	P40394	Alcohol dehydrogenase class 4 mu/sigma chain	-0.504715	0.0196253	0.446032	19.25	18.93	20.93	20.56	17.32	14.92	20.38	20.7	15.34	17.5	19.64	21.49	20.65	20.99	20.21	16.79	19.33	17.43	20.27	20.4	19.65
ADT1_HUMAN	P12235	ADP/ATP translocase 1	-0.209191	0.36279	0.663191	13.82	20.87	14.29	16.07	12.12	13.34	14.14	15.02	17.39	17.27	25.4	22.29	21.37	19.63	17.23	16.22	12.43	18.33	13.9	17.84	19.11
ADT2_HUMAN	P05141	ADP/ATP translocase 2	-0.318219	0.159775	0.546714	17.97	19	17.49	18.63	16.62	15.98	16	16.68	18.43	18.05	23.05	22.32	19.92	20.36	19.27	17.98	17.02	19.53	17.09	17.56	18.74
ADT3_HUMAN	P12236	ADP/ATP translocase 3	-0.274144	0.229144	0.595056	17.38	19.63	17.55	18.2	16.19	16.18	17.08	17.86	18.95	18.05	22.76	21.65	21.19	20.17	18.98	17.6	16.54	19.27	16.86	18.97	18.99
AHNK_HUMAN	Q09666	Neuroblast differentiation-associated protein AHNAK	-0.359859	0.109086	0.500985	21.48	18.28	22.33	21.34	21.4	19.28	18.36	21.17	18.61	19.04	19.95	22.38	22.17	21.09	21.75	19.1	20.55	21.02	19.94	20.35	18.19
AK1BA_HUMAN	O60218	Aldo-keto reductase family 1 member B10	-0.251309	0.271821	0.604588	16.58	15.01	16.7	16.26	18.88	14.41	15.27	16.92	14.92	16.77	14.89	17.03	17.06	18.23	17.55	13.76	14.65	19.66	17.44	16.2	17.14
AL3A1_HUMAN	P30838	Aldehyde dehydrogenase, dimeric NADP-preferring	-0.374938	0.0939911	0.500985	19.31	17.17	19.68	19.45	19.6	18.77	20.23	21.64	18.72	21.32	22.93	20.59	19.82	20.59	22.11	18.05	19.49	21.9	21	18.23	21.49
AL9A1_HUMAN	P49189	4-trimethylaminobutyraldehyde dehydrogenase	-0.0176789	0.939372	0.974746	18.79	17.56	20	19.18	19.32	18.59	18.62	18.87	20.01	17.1	18.82	21.56	21.1	13.73	20.56	17.52	18.74	21.5	19.69	20.91	19.5
ALBU_HUMAN	Q9P157	Serum albumin	0.107262	0.643525	0.846653	25.63	26.46	25.02	26.17	24.85	25.99	25.86	25.82	25.87	26.03	25.18	26.31	25.15	24.57	25.68	25.62	25.88	25.9	25.5	26.37	27.83
ALDOA_HUMAN	P04075	Fructose-bisphosphate aldolase A	-0.523352	0.0149055	0.442966	22.82	21.33	23.28	22.65	22.04	23.56	22.51	23.58	21.41	21.78	24.1	22.76	22.2	22.3	22.67	20.5	21.77	22.61	22.77	22.94	22.29
AMY1_HUMAN	P04745	Alpha-amylase 1	-0.338076	0.133891	0.522912	28.17	28.05	27.52	27.56	27.17	26.79	28.63	26.11	25.49	27.07	26.95	27.06	27.42	28.23	28.37	27.11	28.19	26.8	26.73	27.81	27.69
AMY2B_HUMAN	P19961	Alpha-amylase 2B	-0.253859	0.266823	0.604588	28.37	28.51	27.67	27.72	27.33	26.79	28.97	26.17	26.07	27.48	27.14	27.27	27.64	28.63	28.61	27.39	28.71	26.93	27.25	28.19	27.94
AMYP_HUMAN	P04746	Pancreatic alpha-amylase	-0.236106	0.302831	0.62585	28.22	28.26	27.48	27.56	27.18	26.58	28.78	25.86	25.98	27.31	26.89	27.18	27.48	28.42	28.44	27.24	28.59	26.85	27.21	28.1	27.75
ANXA1_HUMAN	P04083	Annexin A1	0.0538313	0.816734	0.931264	25.71	25.04	25.73	25.81	25.51	24.77	25.08	26.07	24.23	26	24.72	25.86	25.16	25.65	24.97	26.19	25.73	25.56	24.31	26.11	24.8
ANXA2_HUMAN	P07355	Annexin A2	0.130431	0.573076	0.800692	23.1	23.4	22.32	23.74	23.94	22.6	22.35	23.47	21.87	23.48	21.13	24.27	23.17	23.31	23.35	23.03	23.29	23.74	23.08	24.54	21.86
ANXA3_HUMAN	P12429	Annexin A3	-0.0788163	0.734162	0.890329	21.86	18.4	20.29	17.27	20.06	15.9	18.21	22.01	15.2	16.28	15.62	21.99	19.99	20.21	20.78	18.66	17.65	21.21	21.67	18.67	17.14
ANXA5_HUMAN	P08758	Annexin A5	-0.180016	0.4349	0.671995	19.74	15.66	16.08	15.71	19.97	15.96	15.52	16	16.71	14.25	11.49	19.21	18.22	19.51	19.29	15.96	12.06	18.57	16.19	13.6	13.87
ANXA8_HUMAN	P13928	Annexin A8	-0.457809	0.0368977	0.446032	18.36	15.72	20.06	19.7	20.64	16.81	18.97	20.82	14.91	18.29	18.24	21.84	21.31	20.2	18.67	15.05	19.38	17.17	16.2	19.12	15.44
APOA1_HUMAN	P02647	Apolipoprotein A-I	0.277131	0.223907	0.590381	22.81	23.73	18.5	22.39	16.97	22.7	20.54	22.29	22.1	19.39	16.4	20.66	18.38	18.85	20.35	22.49	21.28	21.13	21.71	19.32	25.44
APOA2_HUMAN	P02652	Apolipoprotein A-II	0.321327	0.155511	0.546714	21.68	23.21	15.85	21.61	14.5	12.46	21.4	16.16	16.69	21.08	14.78	13.42	13.29	15.65	14.58	23.27	29.56	16.59	15.74	13.53	24.03
ARF1_HUMAN	P84077	ADP-ribosylation factor 1	-0.52165	0.0152943	0.442966	19.8	19.89	21.88	20.12	16.76	17.04	16.97	19.96	14.14	19.9	17.69	21.81	19.61	19.23	20.97	15.84	15.92	18.36	18.64	18.03	15.01
ARF3_HUMAN	P61204	ADP-ribosylation factor 3	-0.52165	0.0152943	0.442966	19.8	19.89	21.88	20.12	16.76	17.04	16.97	19.96	14.14	19.9	17.69	21.81	19.61	19.23	20.97	15.84	15.92	18.36	18.64	18.03	15.01
ARP2_HUMAN	P61160	Actin-related protein 2	-0.205972	0.370389	0.663191	18.28	15.62	17.2	16.23	19.43	14.82	16.61	18.92	15.91	16.81	16.25	20.56	20.78	18.45	17.98	16.16	14.07	18.85	18.15	15.97	16.22
ARP3_HUMAN	P61158	Actin-related protein 3	-0.283309	0.213325	0.588268	19.95	17.78	19.9	18.26	19.47	16.48	16.52	20.4	16.4	17.17	17.44	19.81	19.64	20.01	20.01	17.06	16.57	19.35	20.49	16.52	17.85
ARPC3_HUMAN	O15145	Actin-related protein 2/3 complex subunit 3	0.0462188	0.842311	0.947647	20.66	16.49	19.47	18.52	19.35	19.29	18.52	22	20.4	17.53	18.83	21.86	19.81	19.61	20.91	19.01	17.72	21.52	21.74	22.39	11.76
ARPC4_HUMAN	P59998	Actin-related protein 2/3 complex subunit 4	-0.197091	0.391817	0.663191	21.46	16.59	21.18	17.76	20.39	16.85	18.29	22.13	16.96	18.98	18.09	22.09	21.78	21.33	21.25	18.3	18.49	21.22	21.04	18.09	16.54
ATPA_HUMAN	P25705	ATP synthase subunit alpha, mitochondrial	-0.263924	0.247666	0.604588	21.43	18.99	21.42	20.07	20.93	16.84	18.91	21.18	17.57	18.46	19.56	20.83	18.96	19.39	19.18	17.93	19.23	20.73	18.77	18.58	17.08
ATPB_HUMAN	P06576	ATP synthase subunit beta, mitochondrial	-0.225332	0.326061	0.640329	21.84	19.69	21.31	21.31	21.74	19.4	21.36	21.27	22	20.77	21.91	21.02	20.64	21.58	21.18	18.72	21.19	21.44	20.92	21.09	18.41
AXA2L_HUMAN	A6NMY6	Putative annexin A2-like protein	0.12853	0.578729	0.80406	23.16	23.28	22.51	23.77	23.94	22.65	22.56	23.35	22.13	23.33	20.96	24.33	23.24	23.35	23.42	23.2	23.42	23.76	23.13	24.61	21.85
AXA81_HUMAN	Q5T2P8	Annexin A8-like protein 1	-0.457809	0.0368977	0.446032	18.36	15.72	20.06	19.7	20.64	16.81	18.97	20.82	14.91	18.29	18.24	21.84	21.31	20.2	18.67	15.05	19.38	17.17	16.2	19.12	15.44
AXA82_HUMAN	Q5VT79	Annexin A8-like protein 2	-0.457809	0.0368977	0.446032	18.36	15.72	20.06	19.7	20.64	16.81	18.97	20.82	14.91	18.29	18.24	21.84	21.31	20.2	18.67	15.05	19.38	17.17	16.2	19.12	15.44
B2MG_HUMAN	P61769	Beta-2-microglobulin	-0.438624	0.0466941	0.446032	21.69	21.73	21.96	21.16	18.24	21.03	28.75	19.26	20.81	19.39	18.82	17.87	21.95	23.29	23.95	19.97	17.12	19.13	18.61	20.33	19.96
BPI_HUMAN	Q9H203	Bactericidal permeability-increasing protein	-0.0257583	0.911752	0.969405	22.88	16.8	21.13	15.86	20.09	16.59	18.96	21.32	16.49	13.79	15.94	19.74	15.9	21.16	19	16.64	21.49	19.85	22.16	18.61	16.71
BPIL1_HUMAN	Q8N4F0	Bactericidal/permeability-increasing protein-like 1	-0.192258	0.403764	0.663191	22.34	21.96	22.59	22.91	21.63	23.38	22.85	21.94	22.2	22.01	23.79	20.84	20.66	20.72	22.4	20.63	23.08	21.12	22.37	22.44	22.09
CAH6_HUMAN	P23280	Carbonic anhydrase 6	-0.430951	0.0511319	0.446032	23.75	24.77	25	26.36	24.2	24.8	24.87	23.02	22.92	25.86	26.1	24.59	24.92	24.78	25.36	24.38	23.72	25.77	26.24	24.7	24.72
CALL3_HUMAN	P27482	Calmodulin-like protein 3	-0.256367	0.261965	0.604588	20.56	20.11	22.97	21.71	22.17	21.39	19.7	21.78	21.26	20.07	20.75	23.02	22.82	19.47	22.27	20.75	17.95	23.54	22.52	20.72	22.11
CALR_HUMAN	P27797	Calreticulin	0.0531027	0.819174	0.931905	20.61	18.97	20.53	17.25	19.98	17.01	18.33	17.92	18.52	17.62	16.27	20.39	18.4	16.57	20.43	19.01	18.07	20.76	18.82	19.53	18.37
CALX_HUMAN	P27824	Calnexin	-0.369952	0.0988009	0.500985	21.34	16.9	19.21	17.74	18.85	13.82	16.97	19.26	15.36	18.15	17.18	19.71	20.64	19.86	20.5	15.81	14.85	19.14	15.9	15.33	15.75
CAMP_HUMAN	P49913	Cathelicidin antimicrobial peptide	0.134073	0.562315	0.790109	22.55	19.49	20.04	16.44	12.77	12.69	18.78	23.33	12.34	17.56	15.92	22.69	21.56	21.94	21	23.63	22.4	22.44	22.53	20.21	12.63
CAN1_HUMAN	P07384	Calpain-1 catalytic subunit	-0.189689	0.410194	0.663191	16.2	13.53	19.56	18	17.04	16.03	16.55	19.3	18.33	16.26	15.06	21.68	21	17.51	15.36	17.82	15.89	18	17.01	16.39	16.9
CAP1_HUMAN	Q01518	Adenylyl cyclase-associated protein 1	-0.212235	0.355688	0.663191	20.44	16.84	19.94	17.82	19.41	15.5	15.48	20.88	16.07	17.26	17.39	20.53	18.72	19.46	18.44	16.48	14.35	21.63	19.95	17.22	17.63
CAP7_HUMAN	P20160	Azurocidin	-0.196747	0.392661	0.663191	23.11	22.87	22.68	17.4	18.97	18.32	22.41	20.41	16.1	19.93	17.65	22.63	20.96	23.22	20.99	21.81	18.91	21.57	19.79	19.07	18.67
CAPG_HUMAN	P40121	Macrophage-capping protein	-0.188294	0.413708	0.663191	21.05	16.11	21.56	19.67	19.27	19.58	19.78	21.54	17.48	20.61	18.71	20.82	21.05	18.44	21.05	18.49	19.67	21.16	20.73	21.93	19.08
CAPZB_HUMAN	P47756	F-actin-capping protein subunit beta	-0.264081	0.247375	0.604588	19.76	16.61	21.68	18.18	18.39	17.48	16.12	19.91	17.69	19.06	19.05	20.41	19.43	19.06	20.31	19.36	16.56	19.18	18.68	19.43	17.52
CATA_HUMAN	P04040	Catalase	0.0863737	0.709689	0.873463	21.29	15.86	17.7	16.59	17.36	15.55	20.01	20.75	15.36	17.44	16.31	17.25	18.65	18.25	19.09	18.76	17.22	20.1	20.99	17.43	19.42
CATD_HUMAN	P07339	Cathepsin D	-0.2577	0.259405	0.604588	14.24	12.6	14.53	14.14	17.17	11.65	14.29	20.87	16.49	14.65	19.28	12.1	15.77	14.86	21.01	8.38	11.77	15.23	13.72	12.83	15.07
CATG_HUMAN	P08311	Cathepsin G	-0.0875605	0.70587	0.870924	23.84	22.71	22.87	16.64	17.89	16.76	21.88	23.44	15.56	19.72	15.85	23.84	22.93	23.79	23.1	22.42	18.88	21.42	23.13	19.18	19.92
CAZA1_HUMAN	P52907	F-actin-capping protein subunit alpha-1	-0.438148	0.0469606	0.446032	21.36	17.87	21.52	21.52	21.61	20.26	20.38	22.23	19.99	21.21	21.19	21.9	21.29	21.92	21.67	20.09	19.56	20.89	21.52	20.77	20.19
CBR1_HUMAN	P16152	Carbonyl reductase [NADPH] 1	-0.248176	0.278042	0.610216	17.73	16.72	19.42	18.38	20.44	15.78	20.46	20.45	17.83	20.26	18.89	21.64	21.27	18.9	21.11	17.78	18.9	20.24	19.49	19.62	17.43
CBR3_HUMAN	O75828	Carbonyl reductase [NADPH] 3	0.0556461	0.810661	0.928581	13.35	17.64	18.43	19.79	20.5	15.71	12.99	18.47	14.9	14.88	18.29	14.37	15.88	11.93	13.94	15.54	13.31	18.89	19	15.65	15
CD040_HUMAN	Q6MZM9	Uncharacterized protein C4orf40	-0.414042	0.0620488	0.446032	17.98	23.33	22.15	24.4	22.84	22.32	18.77	21.22	21.22	23.5	23.36	22.46	22.66	23.03	22.81	17.97	20.59	19.94	21.58	22.72	23.1
CDC42_HUMAN	P60953	Cell division control protein 42 homolog	-0.0158155	0.945752	0.976851	20.77	19.4	20.67	17.51	15.41	15.5	15.67	15.29	21.65	18.67	16.82	20.62	20.75	19.34	18.75	18.17	16.62	19.98	17.84	18.94	15.98
CEAM5_HUMAN	P06731	Carcinoembryonic antigen-related cell adhesion molecule 5	0.0211831	0.927382	0.971163	21.92	18.83	20.41	21.93	22.48	21.48	19.77	22	19.68	20.18	20.65	21.65	21.55	22.35	22.25	22.59	22.43	22.4	21.25	19.67	21.81
CERU_HUMAN	P00450	Ceruloplasmin	-0.0567243	0.807059	0.928533	18.17	16.01	17.44	15.49	15.7	11.24	17.21	18.45	17.69	13.21	14.35	16.53	15.24	13.85	19.32	15.34	12.07	17.78	17.27	19.59	22.39
CF058_HUMAN	Q6P5S2	UPF0762 protein C6orf58	0.401916	0.0709078	0.468937	22.01	21.47	21.86	21.84	23.4	23.68	20.38	23.02	23.2	20.65	19.66	22.71	22.56	20.81	21.49	22.98	23.01	23.64	23.17	20.56	19.48
CFAB_HUMAN	Q9BX92	Complement factor B	-0.228239	0.31969	0.640329	16.89	19.05	9.65	14.45	15.49	16.19	17.12	10.99	1.56	6.05	13.12	15.45	9.52	18.44	18.02	14.15	17.35	12.87	12.02	14.29	20.65
CH60_HUMAN	P10809	60 kDa heat shock protein, mitochondrial	0.0580468	0.802645	0.925841	16.65	18.11	16.78	17.28	18.49	16.24	15.46	16.7	16.21	16.02	14.1	19.18	20.35	17.63	19.06	15.91	18.07	20.5	16.43	19.7	14.97
CKAP4_HUMAN	Q07065	Cytoskeleton-associated protein 4	-0.161397	0.484597	0.719641	17.1	11.67	17.11	16.94	17.56	15.23	8.28	19.76	17.71	13.86	16.38	20.29	20.27	17.1	19.63	13.71	12.72	18.84	16.77	14.48	15.82
CLCA4_HUMAN	Q14CN2	Calcium-activated chloride channel regulator 4	-0.215705	0.347692	0.660748	19.28	13.8	20.98	8.75	11.81	10.78	18.78	14.51	16.15	12.79	16.46	14.1	12.93	10	20.02	10.91	19.96	7.68	10.9	8.94	18.18
CLH1_HUMAN	Q00610	Clathrin heavy chain 1	-0.286107	0.208642	0.58799	17.9	15.03	19.23	16.88	18.21	15.48	15.92	19.35	14.39	13.84	14.99	20.74	19.26	17.03	17.39	15.23	16.07	18.84	16.93	17.62	15.43
CLH2_HUMAN	P53675	Clathrin heavy chain 2	-0.0646508	0.780692	0.908975	17.69	15.67	19.38	14.29	18.1	15.81	14.63	18.99	15.08	13.8	12.78	20.1	19.39	15.72	15.09	14.65	14.7	16.78	17.34	17.27	15.57
CLIC1_HUMAN	O00299	Chloride intracellular channel protein 1	0.0330523	0.8869	0.962587	18.18	16.99	20.89	17.67	18.69	17.09	18.89	21.52	18.66	19.7	17.84	21.57	19.59	20.38	18.15	19.84	20.7	20.93	18.73	20.37	19.76
CLIC3_HUMAN	O95833	Chloride intracellular channel protein 3	-0.254862	0.264874	0.604588	18	18.74	19.85	20.66	17.53	14.66	15.97	19.26	12.79	16.89	16.79	21.1	20.84	15.44	16.44	15.4	18.03	18.46	16.81	16.66	14.77
CLUS_HUMAN	P10909	Clusterin	-0.0487782	0.833694	0.944091	18.05	19.71	15.95	20.45	20.28	21.03	21.92	20.18	19.74	18.58	17.27	18.65	19.49	20.97	22.03	19.32	19.2	20.25	21.63	17.01	22.84
CO3_HUMAN	P01024	Complement C3	0.0350453	0.880126	0.959434	19.79	19.99	15.59	16.82	15.73	15.71	17.51	18.98	18.31	14.13	14.06	21.04	18.83	17.2	20.33	17.1	16.69	18.95	18.53	18.35	23.48
CO4A_HUMAN	Q5JQM8	Complement C4-A	0.0255359	0.912511	0.969405	17.16	15.76	11.27	8.81	8.77	9.89	13.58	12.56	8.43	11.06	10.64	16.96	13	17.16	16.25	13.27	14.49	18.79	19.88	14.13	20.23
CO4B_HUMAN	Q9UIP5	Complement C4-B	0.0255359	0.912511	0.969405	17.16	15.76	11.27	8.81	8.77	9.89	13.58	12.56	8.43	11.06	10.64	16.96	13	17.16	16.25	13.27	14.49	18.79	19.88	14.13	20.23
COF1_HUMAN	P23528	Cofilin-1	-0.322963	0.153298	0.546714	22.43	22.7	23.17	22.62	23.03	22.3	21.33	22.89	21.55	22.33	22.19	22.69	22.22	22.09	22.37	21.61	20.65	22.22	23.08	21.88	22.19
COF2_HUMAN	Q9Y281	Cofilin-2	-0.378231	0.0909109	0.499732	22.76	22.56	22.88	22.43	22.53	22.12	21.88	22.84	21.41	22.63	22.15	22.56	22.07	22.45	22.34	21.4	20.16	21.63	22.84	22.72	21.81
Contaminant_TRYP_PIG			0.238148	0.298545	0.62522	28.44	27.94	27.97	27.17	26.05	26.59	26.02	28.01	27.44	26.29	26.52	26.67	27.13	26.01	27.8	27.72	26.46	27.56	28.28	26.56	27.2
COR1A_HUMAN	P31146	Coronin-1A	-0.167719	0.467414	0.709107	21.3	17.21	19.81	16.97	17.46	14.52	18.1	22.17	12.32	14.95	13.59	20.77	20.08	20.37	20.84	17.55	16.62	19.83	21.55	17.63	16.68
CRIS3_HUMAN	P54108	Cysteine-rich secretory protein 3	0.00879214	0.969828	0.985727	22.3	23.09	23.26	22.63	17.65	21.07	22.67	19.6	20.42	21.56	21.83	23.24	22.75	22.94	23.12	25.64	25.12	22.62	23.52	22.28	22.57
CRNN_HUMAN	Q9UBG3	Cornulin	-0.0719983	0.756457	0.903529	24.27	23.28	23.95	23.1	24.13	23.59	23.2	23.87	23.11	22.6	22.79	24.56	24.03	24.06	23.64	24.22	23.38	23.01	22.71	24.01	24.07
CRYAB_HUMAN	P02511	Alpha-crystallin B chain	0.0665036	0.774561	0.904532	17.44	17.17	18.06	19.45	19.76	14.64	15.64	19.61	17.79	16.33	18.74	21.64	22.13	16.97	20.81	19.59	18.9	20.4	21.05	16.91	15.11
CTNB1_HUMAN	P35222	Catenin beta-1	-0.488346	0.024696	0.446032	22.46	15.39	23.07	19.47	19.27	18.67	18.57	18.64	17.53	20.99	19.52	22.17	22.23	22.35	22.36	17.94	20.35	18.39	19.42	20.58	19.72
CYC_HUMAN	P99999	Cytochrome c	0.0236631	0.918906	0.971163	25.45	26.19	22.27	25.46	24.27	24.84	25.49	24.4	24.77	25.19	22.29	24.82	25.09	25.61	25.04	22.49	24.3	25.08	26.18	24.8	24.67
CYTA_HUMAN	P01040	Cystatin-A	-0.0613737	0.791567	0.91733	21.14	17.49	19.31	20.71	21.58	20.93	18.14	23.03	22.14	22.93	19.66	22.89	23.46	23.03	16.49	16.74	18.13	21.18	19.92	18.28	16.1
CYTB_HUMAN	P04080	Cystatin-B	0.0178225	0.93888	0.974746	26.08	24.6	26.6	25.68	25.67	25.48	25.08	26.27	25.65	26.01	26.12	26.62	25.75	26.97	25.9	27.11	26.84	26.28	25.66	25.98	26.14
CYTC_HUMAN	P01034	Cystatin-C	-0.192524	0.4031	0.663191	22.46	24.56	22.9	23.49	19.82	22.34	23.39	21.52	21.67	23.8	24.47	23.86	23.77	22.43	23.58	23.39	23.39	21.33	23.74	22.69	22.34
CYTD_HUMAN	P28325	Cystatin-D	-0.662369	0.00106989	0.33523	21.84	22.51	25.27	26.36	25.71	25.95	26.05	20.99	21.48	26	26.89	24.67	26.13	24.24	25.45	22.03	22.33	20.75	23.78	23.14	25.31
CYTN_HUMAN	P01037	Cystatin-SN	-0.248953	0.276491	0.610082	26.66	27.08	26.44	26.14	25.41	25.35	25.79	24.88	23.31	27.29	27.58	24.47	26.2	23.82	27.14	24.57	24.01	23.38	24.84	27.25	25.48
CYTS_HUMAN	P01036	Cystatin-S	-0.275843	0.226154	0.590381	26.41	26.86	25.86	25.62	23.5	24.26	24.65	24.06	22.59	27.87	28	24.97	25.36	23.77	27.04	24	24.48	23.51	23.5	25.86	23.75
CYTT_HUMAN	P09228	Cystatin-SA	-0.277364	0.2235	0.590381	25.63	25.9	25.31	24.37	23.48	23.75	23.7	24.43	22.53	26.3	26.68	21.83	23.21	22.93	26.01	20.88	21.94	21.27	22.6	26.04	23.23
DESM_HUMAN	Q8TD99	Desmin	-0.354109	0.11528	0.50157	22.41	21.07	20.86	16.98	20.53	20.51	18.53	22.09	15.87	17.79	18.17	20.88	19.47	22.26	22.18	16.16	14.3	19.59	22.02	18.5	20.28
DESP_HUMAN	P15924	Desmoplakin	-0.465182	0.0335924	0.446032	22.14	18.18	22.6	20.78	20.68	17.88	20.34	20.68	16.56	20.2	20.83	22.41	22.18	20.27	21.84	18.75	19.7	21.55	20.63	20.67	19.24
DMBT1_HUMAN	Q9Y4V9	Deleted in malignant brain tumors 1 protein	0.327154	0.14773	0.544294	25.25	23.26	24.15	23.5	24.63	24.49	25.06	24.71	25.42	23.59	23.53	24.09	25.29	24.03	24.44	25.34	25.01	23.49	24.6	23.39	24.63
DSC2_HUMAN	Q02487	Desmocollin-2	-0.428475	0.0526304	0.446032	20.51	17.26	20.85	21.7	21.02	17.31	18.46	20.85	19.53	19.97	19.42	21.35	20.4	20.86	21.04	17.14	17.56	21.97	20.3	18.71	17.98
DSC3_HUMAN	Q14574	Desmocollin-3	-0.288483	0.204721	0.583573	21.42	20.23	18.91	21.57	21.23	17.02	17.68	19.62	20.38	20.22	19.57	19.5	17.37	20.35	20.9	13.48	18.23	22.04	19.02	18.43	19.52
DSG1_HUMAN	Q02413	Desmoglein-1	-0.46041	0.0357041	0.446032	16.25	15.01	20.21	17.61	16.18	15.35	14.67	17.29	15.08	15.3	16.85	21.8	22.21	19.69	20.76	16.45	16.03	18.25	17.1	16.26	14.96
DSG3_HUMAN	P32926	Desmoglein-3	0.0196399	0.93266	0.971848	19.48	20.62	20.28	21.29	19.57	19.21	19.71	22.3	19.58	19.71	19.71	22.27	21.65	21	21.3	20.9	21.44	20.6	21.82	21.59	21
DYL1_HUMAN	P63167	Dynein light chain 1, cytoplasmic	-0.252056	0.27035	0.604588	21.65	18.66	21.25	17.46	19.68	16.08	14.59	20.12	16.68	18.2	20.88	22.46	22.17	19.33	21.26	16.96	15.96	16.31	19.66	19.79	17.19
ECM1_HUMAN	Q8IZ60	Extracellular matrix protein 1	-0.633982	0.0020276	0.33523	16.44	18.47	21.92	20.02	19.76	17.67	18.98	21.47	15.91	19.43	19.75	22.73	21.64	20.41	21.41	15.91	17.02	20.26	19.15	18.46	17.72
EF1A1_HUMAN	P68104	Elongation factor 1-alpha 1	-0.346745	0.123581	0.506579	24.13	22.6	23.86	23.52	23.62	22.98	23.24	23.84	22.14	23.35	23.77	23.66	23.37	23.18	23.3	23.31	22.9	23.52	22.74	23.42	24.05
EF1A2_HUMAN	Q05639	Elongation factor 1-alpha 2	-0.208413	0.36462	0.663191	24.36	22.75	23.75	23.81	23.75	23.8	23.5	24.16	23.06	23.57	24.15	23.88	23.43	23.08	23.45	23.14	23.7	23.97	23.09	23.7	24.47
EF1A3_HUMAN	Q5VTE0	Putative elongation factor 1-alpha-like 3	-0.346745	0.123581	0.506579	24.13	22.6	23.86	23.52	23.62	22.98	23.24	23.84	22.14	23.35	23.77	23.66	23.37	23.18	23.3	23.31	22.9	23.52	22.74	23.42	24.05
EF1G_HUMAN	P26641	Elongation factor 1-gamma	-0.355047	0.114253	0.5015	21.85	19.01	21.69	20.4	20.78	20.06	19.57	21.35	20.75	20.19	20.18	21.35	21.26	21.36	21.15	19.4	19.21	21.32	19.9	19.98	19.26
EF2_HUMAN	P13639	Elongation factor 2	-0.442578	0.0445268	0.446032	20.01	17.75	20.68	20.37	20.09	16.54	19.57	20.71	16.09	19.22	18.86	21.54	21.36	18.68	20.7	17.6	18.28	20.38	18.85	19.02	18.28
ELNE_HUMAN	P08246	Neutrophil elastase	-0.049444	0.831455	0.943711	23.62	22.27	19.97	16.74	20.23	15.44	20.24	21.57	14.2	17.95	15.57	21.79	22.73	23.22	21.89	20.89	17.97	21.24	19.19	18.33	18.21
ENOA_HUMAN	Q6GMP2	Alpha-enolase	-0.402659	0.070339	0.468937	23.43	22.72	23.92	23.06	23.22	22.26	22.7	22.91	22.36	22.6	23.39	23.05	22.88	23.41	23.32	22.67	22.64	23.78	23.36	23.13	23.17
ENPL_HUMAN	P14625	Endoplasmin	-0.104461	0.652261	0.854493	21.46	17.9	20.68	21.29	19.59	19.71	17.14	20.78	18.02	18.1	19.37	16.61	18.58	20.94	20.68	18.94	19.91	21.9	19.36	18.22	20.91
ERO1A_HUMAN	Q96HE7	ERO1-like protein alpha	-0.248822	0.276751	0.610082	20.77	19.39	21.65	21.37	21.38	18.84	19.41	22.37	18.83	18.93	20.29	22.95	22.12	20.69	21.14	20.04	19.57	21.48	21.36	20.89	18.42
EVPL_HUMAN	Q92817	Envoplakin	-0.251641	0.271166	0.604588	20.69	17.27	20.83	20.21	20	16.77	17.98	20.82	15.08	19.35	18.55	21.53	20.76	19.84	20.63	19.04	19.86	20.19	18.8	19.07	16.13
EZRI_HUMAN	P15311	Ezrin	-0.213578	0.35258	0.663191	21.12	19.18	21.35	19.49	20.1	19.73	18.28	21.64	17.77	18.46	19.14	20.95	21	19.89	20.7	18.64	19.14	20.88	20.98	19.23	18.46
FABP5_HUMAN	Q01469	Fatty acid-binding protein, epidermal	-0.416209	0.0605585	0.446032	23.57	21.38	24.2	23.46	23.1	23.62	22.56	21.69	22.72	22.55	24.21	23.54	23.5	23.78	23.41	23.42	23.01	23.48	23.59	21.59	25.22
FAM25_HUMAN	Q5VTM1	Protein FAM25	-0.100217	0.665581	0.857476	18.27	19.5	22.01	18.8	18.68	17.53	17.95	17.42	19.73	18.63	20.09	21.84	21.79	19.56	21	20.05	21.17	21.56	22.39	18.19	19.32
FAS_HUMAN	Q96IT0	Fatty acid synthase	-0.283214	0.213484	0.588268	11.04	12.75	19.12	15.95	18.84	8.68	12.38	16.52	6.14	11.99	10.91	19.95	15.93	9.6	13.18	12.66	11.89	12.85	13.16	16.53	15.15
FIBA_HUMAN	P02671	Fibrinogen alpha chain	0.200265	0.384082	0.663191	22.16	22.31	15.61	20.46	16.29	16.56	21.59	21.45	20.6	19.31	14.73	21.97	15.01	18.37	21.55	19.84	20.02	22.45	21.42	21.91	23.07
FIBB_HUMAN	P02675	Fibrinogen beta chain	0.252146	0.270175	0.604588	21.63	21.47	17.6	17.07	17.39	17.64	20.06	19.92	18.95	17.4	16.4	20.74	17.99	19.5	21.51	20.22	21.3	21.3	20.75	20.12	23.23
FIBG_HUMAN	Q9UC63	Fibrinogen gamma chain	0.306233	0.176981	0.552935	20.95	19.93	18.66	19.44	17.19	18.66	17.8	19.57	21.15	16.75	16.78	20.9	19.14	19.76	20.91	20.89	23.15	22.59	20.57	20.77	23.64
FILA_HUMAN	P20930	Filaggrin	-0.54529	0.0105719	0.442966	15.72	14.39	18.88	16.31	14.03	13.59	15.53	14.71	14.54	17.08	18.67	19.74	18.51	18.08	19.93	14.88	15.29	18.5	18.82	14.89	16.85
FLNA_HUMAN	P21333	Filamin-A	-0.368165	0.100568	0.500985	21.11	13.53	17.51	15.35	13.66	16.5	17.63	16.3	14.6	14.93	17.38	20.86	18.18	18.05	16.04	16.45	14.75	17.25	15.91	16.54	16.32
G3P_HUMAN	P04406	Glyceraldehyde-3-phosphate dehydrogenase	-0.225119	0.326531	0.640329	22.99	22.78	23.28	22.87	22.63	21.53	21.34	23.44	21.91	22.52	22.35	23.53	23.41	23.2	23.5	21.92	21.83	23.57	23.86	22.24	22.58
G6PD_HUMAN	P11413	Glucose-6-phosphate 1-dehydrogenase	-0.405933	0.0678734	0.467572	20.81	16.08	20.12	14.47	16.06	15.9	17.61	20.26	14.59	13.76	17.15	21.64	17.74	19.97	19.67	15.73	16.24	18.25	18.06	12.83	15.96
G6PI_HUMAN	P06744	Glucose-6-phosphate isomerase	-0.217499	0.343597	0.655478	21.63	18.86	21.58	18.98	21.07	17.33	18.33	20.93	18.45	18.49	17.57	21.26	20.76	21.73	21	19.06	17.27	21.42	21.36	18.97	19.2
GBLP_HUMAN	P63244	Guanine nucleotide-binding protein subunit beta-2-like 1	-0.371959	0.096844	0.500985	17.58	17.85	15.55	18.66	19.94	15.4	17.76	17.95	17.02	15.24	17.36	21.53	20.12	18.61	19.33	15.04	15.06	18.81	16.31	16.77	16.89
GBP6_HUMAN	Q6ZN66	Guanylate-binding protein 6	-0.284684	0.211015	0.588268	21.22	19.87	21.8	21.25	21.24	19.01	21.29	22.02	18.69	19.39	20.34	22.47	21.7	19.75	22.19	20.37	20.57	21.69	20.71	21.83	19.76
GDIA_HUMAN	P31150	Rab GDP dissociation inhibitor alpha	-0.316454	0.162233	0.546714	20.7	18.22	19.45	19.64	20.45	16.63	16.66	19.01	16.66	18.23	16.81	20.48	20.27	20.75	20.29	16.74	16.18	20.35	19.57	18.55	17.5
GDIB_HUMAN	P50395	Rab GDP dissociation inhibitor beta	-0.265571	0.244619	0.604588	20.65	18.93	20	19.83	20.63	17.26	17.44	19.99	17.94	18.8	17.65	20.94	20.59	21.23	20.79	18.14	17.35	20.95	19.94	19.06	18.31
GDIR1_HUMAN	P52565	Rho GDP-dissociation inhibitor 1	0.0680581	0.769428	0.904532	21.18	20.68	21.48	15.4	17.59	18.05	17.91	16.49	17.95	17.52	18.03	18.62	20.17	20.45	20.58	21.57	16.67	21.25	20.02	19.46	18.01
GDIR2_HUMAN	P52566	Rho GDP-dissociation inhibitor 2	0.030837	0.894438	0.968649	21.56	21.04	21.6	12.96	17.23	15.04	18.33	23.42	16.56	18.37	13.8	19.88	19.24	21.04	22.08	17.39	16.6	18.99	22.4	19.67	17.46
GELS_HUMAN	P06396	Gelsolin	-0.18128	0.431629	0.671122	21.59	18.81	20.89	18.14	20.77	19.28	20.67	22.16	19.75	18.07	18.24	20.3	20.89	21.54	21.67	17.88	19.5	22.05	21.86	17.68	21.03
GFAP_HUMAN	Q96P18	Glial fibrillary acidic protein	-0.426119	0.054088	0.446032	25.6	24.65	24.73	22.17	23.95	23.73	24.14	23.89	18.74	21.88	23.31	24.93	24.47	25.29	25.09	22.16	21.65	24.83	24.55	22.85	24.67
GLNA_HUMAN	P15104	Glutamine synthetase	0.0562261	0.808723	0.928533	20.45	16.66	20.77	15.47	17.57	13.44	20.38	17.76	17.26	15.39	14.58	15.16	17.79	12.91	17.48	15.47	19.49	15.45	19.89	14.82	18.96
GRP78_HUMAN	P11021	78 kDa glucose-regulated protein	-0.226962	0.32248	0.640329	19.69	17.36	20.87	20.04	20.66	18.26	18.34	20.55	18.56	18.58	17.86	21.59	20.69	19.13	20.81	19.45	19.42	20.11	19.36	19.35	18.35
GSTP1_HUMAN	P09211	Glutathione S-transferase P	-0.333467	0.139613	0.537299	23.18	22.38	23.52	23.06	22.35	22.19	22.35	22.16	22.48	21.28	22.75	23.3	23.11	22.78	23.19	22.48	22.82	22.85	23.57	22.77	23.48
H11_HUMAN	Q02539	Histone H1.1	0.08778	0.705164	0.870924	19.3	18.3	14.43	14.89	17.45	6.4	15.86	18.43	15.39	14.05	15.06	22.59	21.1	19.77	20.55	15.86	19.85	14.74	21.09	20.6	15.68
H12_HUMAN	P16403	Histone H1.2	-0.00165323	0.994325	0.994325	19.37	17.06	18.01	15.14	15.46	12.68	17.59	20.43	15.38	15.42	15.69	18.9	19.24	19.78	19.81	15.23	19.66	18.61	21.37	18.42	16.4
H13_HUMAN	P16402	Histone H1.3	-0.00165323	0.994325	0.994325	19.37	17.06	18.01	15.14	15.46	12.68	17.59	20.43	15.38	15.42	15.69	18.9	19.24	19.78	19.81	15.23	19.66	18.61	21.37	18.42	16.4
H14_HUMAN	P10412	Histone H1.4	-0.00165323	0.994325	0.994325	19.37	17.06	18.01	15.14	15.46	12.68	17.59	20.43	15.38	15.42	15.69	18.9	19.24	19.78	19.81	15.23	19.66	18.61	21.37	18.42	16.4
H15_HUMAN	P16401	Histone H1.5	0.0208152	0.92864	0.971163	18.11	16.72	12.91	13.86	13.11	12.72	17.45	20.22	15.89	12.82	14.56	22.78	20.15	20.46	19.51	17.06	15.86	15.94	21.17	18.26	14.54
H1T_HUMAN	P22492	Histone H1t	-0.0367427	0.874363	0.95736	19.57	16.97	11.95	13.83	17.29	10.13	17.11	17.39	14.97	15.48	20.47	22.76	21.59	20.22	20.55	12.74	19.18	14.89	21.37	20.84	16.97
H2A1_HUMAN	P0C0S8	Histone H2A type 1	-0.309651	0.17195	0.546714	22.81	21.99	22.65	21.54	19.25	19.89	22.54	21.31	18.77	20.8	20.92	22.79	21.43	23.23	23.19	22.9	21.58	21.7	21.59	21.83	20.15
H2A1A_HUMAN	Q96QV6	Histone H2A type 1-A	0.267021	0.241955	0.604588	21.75	22.9	20.61	22.65	23.36	23.89	23.22	25.03	22.79	23.49	21.46	23.49	22.22	21.24	23.46	20.95	24.05	24.44	24.53	24.18	23.51
H2A1B_HUMAN	P04908	Histone H2A type 1-B/E	-0.297459	0.190351	0.565355	21.97	21.13	21.9	21.42	20.5	19.5	20.3	19.49	17.87	19.52	19.39	22.02	20.67	22.44	22.53	21.97	20.38	19.93	21.98	21.12	19.28
H2A1C_HUMAN	Q93077	Histone H2A type 1-C	-0.261809	0.251617	0.604588	22.18	21.34	21.81	21	19.65	19.13	20.34	19.36	18	19.59	19.13	22.17	20.73	22.53	22.56	22.12	20.39	19.97	20.98	21.08	18.5
H2A1D_HUMAN	P20671	Histone H2A type 1-D	-0.364911	0.103845	0.500985	22.68	21.84	22.83	22.01	20.06	20.33	22.72	21.64	18.71	20.85	21.36	22.69	21.43	23.2	23.23	22.83	21.69	21.84	22.65	21.94	21.1
H2A1H_HUMAN	Q96KK5	Histone H2A type 1-H	-0.309651	0.17195	0.546714	22.81	21.99	22.65	21.54	19.25	19.89	22.54	21.31	18.77	20.8	20.92	22.79	21.43	23.23	23.19	22.9	21.58	21.7	21.59	21.83	20.15
H2A1J_HUMAN	Q99878	Histone H2A type 1-J	-0.309651	0.17195	0.546714	22.81	21.99	22.65	21.54	19.25	19.89	22.54	21.31	18.77	20.8	20.92	22.79	21.43	23.23	23.19	22.9	21.58	21.7	21.59	21.83	20.15
H2A2A_HUMAN	Q6FI13	Histone H2A type 2-A	-0.280236	0.218546	0.590381	21.68	20.68	22.02	20.66	18.36	19.2	21.24	20.83	17.88	19.9	19.91	21.92	21.12	22.22	22.03	21.71	20.51	21.45	21.3	21.52	19.2
H2A2B_HUMAN	Q8IUE6	Histone H2A type 2-B	-0.226816	0.322799	0.640329	22.18	21.11	22.14	21.04	21.14	20.57	22.36	22.25	18.8	21.02	21.12	22.18	21.57	22.58	22.84	22.71	20.99	21.91	20.73	22.49	19.61
H2A2C_HUMAN	Q16777	Histone H2A type 2-C	-0.280236	0.218546	0.590381	21.68	20.68	22.02	20.66	18.36	19.2	21.24	20.83	17.88	19.9	19.91	21.92	21.12	22.22	22.03	21.71	20.51	21.45	21.3	21.52	19.2
H2A3_HUMAN	Q7L7L0	Histone H2A type 3	-0.297459	0.190351	0.565355	21.97	21.13	21.9	21.42	20.5	19.5	20.3	19.49	17.87	19.52	19.39	22.02	20.67	22.44	22.53	21.97	20.38	19.93	21.98	21.12	19.28
H2AJ_HUMAN	Q9BTM1	Histone H2A.J	-0.309651	0.17195	0.546714	22.81	21.99	22.65	21.54	19.25	19.89	22.54	21.31	18.77	20.8	20.92	22.79	21.43	23.23	23.19	22.9	21.58	21.7	21.59	21.83	20.15
H2AV_HUMAN	Q71UI9	Histone H2A.V	0.151012	0.513489	0.7513	20.95	17.64	14.3	19.07	19.58	15.31	19.7	21.55	15.27	17.4	15.04	18.73	18.83	19.21	18.75	17.28	17.96	21.35	19.56	18.16	14.36
H2AX_HUMAN	P16104	Histone H2A.x	-0.260276	0.254504	0.604588	21.89	20.77	22.32	21.64	22.58	21.3	22.59	22.85	18.73	21.12	21.78	21.96	21.6	22.45	22.84	22.58	21.06	22.14	22.11	22.74	20.89
H2AY_HUMAN	O75367	Core histone macro-H2A.1	-0.233188	0.309021	0.628174	21.13	18.6	21.89	20.51	21.13	19.72	20.95	20.86	16.17	19.36	20.46	20.16	20.94	22.25	21.72	22.56	19.74	20.82	20.68	21.66	18.82
H2AZ_HUMAN	P0C0S5	Histone H2A.Z	0.151012	0.513489	0.7513	20.95	17.64	14.3	19.07	19.58	15.31	19.7	21.55	15.27	17.4	15.04	18.73	18.83	19.21	18.75	17.28	17.96	21.35	19.56	18.16	14.36
H2B1A_HUMAN	Q96A08	Histone H2B type 1-A	0.219882	0.338205	0.647682	26.79	26.51	26.21	24.86	25.65	24.67	25	26.01	24.48	26.13	25.26	25.36	25.07	26.96	26.04	27.2	26.09	25.57	25.45	25.68	23.99
H2B1B_HUMAN	P33778	Histone H2B type 1-B	0.18535	0.42118	0.663191	25.98	25.97	25.86	24.61	25.53	24.14	24.71	25.71	23.91	25.64	24.85	25	24.81	26.39	25.63	26.82	25.36	25.23	25.08	25.52	23.39
H2B1C_HUMAN	P62807	Histone H2B type 1-C/E/F/G/I	0.18535	0.42118	0.663191	25.98	25.97	25.86	24.61	25.53	24.14	24.71	25.71	23.91	25.64	24.85	25	24.81	26.39	25.63	26.82	25.36	25.23	25.08	25.52	23.39
H2B1D_HUMAN	P58876	Histone H2B type 1-D	0.18535	0.42118	0.663191	25.98	25.97	25.86	24.61	25.53	24.14	24.71	25.71	23.91	25.64	24.85	25	24.81	26.39	25.63	26.82	25.36	25.23	25.08	25.52	23.39
H2B1H_HUMAN	Q93079	Histone H2B type 1-H	0.18535	0.42118	0.663191	25.98	25.97	25.86	24.61	25.53	24.14	24.71	25.71	23.91	25.64	24.85	25	24.81	26.39	25.63	26.82	25.36	25.23	25.08	25.52	23.39
H2B1J_HUMAN	P06899	Histone H2B type 1-J	0.18535	0.42118	0.663191	25.98	25.97	25.86	24.61	25.53	24.14	24.71	25.71	23.91	25.64	24.85	25	24.81	26.39	25.63	26.82	25.36	25.23	25.08	25.52	23.39
H2B1K_HUMAN	O60814	Histone H2B type 1-K	0.18535	0.42118	0.663191	25.98	25.97	25.86	24.61	25.53	24.14	24.71	25.71	23.91	25.64	24.85	25	24.81	26.39	25.63	26.82	25.36	25.23	25.08	25.52	23.39
H2B1L_HUMAN	Q99880	Histone H2B type 1-L	0.18535	0.42118	0.663191	25.98	25.97	25.86	24.61	25.53	24.14	24.71	25.71	23.91	25.64	24.85	25	24.81	26.39	25.63	26.82	25.36	25.23	25.08	25.52	23.39
H2B1M_HUMAN	Q99879	Histone H2B type 1-M	0.18535	0.42118	0.663191	25.98	25.97	25.86	24.61	25.53	24.14	24.71	25.71	23.91	25.64	24.85	25	24.81	26.39	25.63	26.82	25.36	25.23	25.08	25.52	23.39
H2B1N_HUMAN	Q99877	Histone H2B type 1-N	0.18535	0.42118	0.663191	25.98	25.97	25.86	24.61	25.53	24.14	24.71	25.71	23.91	25.64	24.85	25	24.81	26.39	25.63	26.82	25.36	25.23	25.08	25.52	23.39
H2B1O_HUMAN	P23527	Histone H2B type 1-O	0.18535	0.42118	0.663191	25.98	25.97	25.86	24.61	25.53	24.14	24.71	25.71	23.91	25.64	24.85	25	24.81	26.39	25.63	26.82	25.36	25.23	25.08	25.52	23.39
H2B2E_HUMAN	Q16778	Histone H2B type 2-E	0.18535	0.42118	0.663191	25.98	25.97	25.86	24.61	25.53	24.14	24.71	25.71	23.91	25.64	24.85	25	24.81	26.39	25.63	26.82	25.36	25.23	25.08	25.52	23.39
H2B2F_HUMAN	Q5QNW6	Histone H2B type 2-F	0.18535	0.42118	0.663191	25.98	25.97	25.86	24.61	25.53	24.14	24.71	25.71	23.91	25.64	24.85	25	24.81	26.39	25.63	26.82	25.36	25.23	25.08	25.52	23.39
H2B3B_HUMAN	Q8N257	Histone H2B type 3-B	0.18535	0.42118	0.663191	25.98	25.97	25.86	24.61	25.53	24.14	24.71	25.71	23.91	25.64	24.85	25	24.81	26.39	25.63	26.82	25.36	25.23	25.08	25.52	23.39
H2BFS_HUMAN	P57053	Histone H2B type F-S	0.18535	0.42118	0.663191	25.98	25.97	25.86	24.61	25.53	24.14	24.71	25.71	23.91	25.64	24.85	25	24.81	26.39	25.63	26.82	25.36	25.23	25.08	25.52	23.39
H33_HUMAN	P84243	Histone H3.3	-0.193763	0.400023	0.663191	22.54	22.23	22.81	19.45	19.19	19.45	21.35	12.79	22.7	21.41	19.88	22.19	21.88	23.4	21.58	18.45	26.39	17.81	13.19	21.3	20.59
H4_HUMAN	P62805	Histone H4	0.511208	0.0178615	0.442966	22.66	24	23.88	22.65	23.24	23.46	23.16	24.19	23.33	23.24	22.75	22.97	23.6	21.91	23.89	24.31	24.42	24.65	24.11	23.83	22.05
H90B2_HUMAN	Q58FF8	Putative heat shock protein HSP 90-beta 2	-0.0767187	0.741	0.894248	21.83	19.08	21.52	20.11	21.28	19.62	20.28	21.93	19.02	20.36	20.35	20.33	21.97	21.52	21.63	19.15	21.82	21.79	20.21	22.64	20.06
H90B3_HUMAN	Q58FF7	Putative heat shock protein HSP 90-beta-3	0.025473	0.912726	0.969405	20.98	19.67	20.93	18.92	20.68	15.02	18.17	20.04	16.99	18.44	19.26	20.54	21.3	19.29	19.42	18.93	20.86	20.57	20.1	17.79	15.46
H90B4_HUMAN	Q58FF6	Putative heat shock protein HSP 90-beta 4	-0.13557	0.55792	0.786159	21.52	20.9	21.23	20.84	20.97	11.64	18.29	20.75	16.98	18.32	22.01	19.58	21.21	21.02	20.94	15.91	22.59	21.88	20.5	16.75	16.35
HBA_HUMAN	P69905	Hemoglobin subunit alpha	-0.00502231	0.982762	0.990752	22.6	19.41	17.78	19.03	14.2	20.36	25.28	13.54	16.92	16.98	16.2	19.5	16.17	13.4	14.14	20.04	22.73	13.07	21.81	12.95	25.86
HBAZ_HUMAN	P02008	Hemoglobin subunit zeta	0.0390157	0.866656	0.95537	23.95	23.41	23.81	19.19	15.54	21.86	28.14	16.45	21.56	14.57	16.36	14.7	7.19	15.81	13.38	23.17	26.64	17.67	23.03	5.53	27.54
HBB_HUMAN	Q549N7	Hemoglobin subunit beta	0.0755986	0.744659	0.896483	25.9	24.55	19.25	20.96	15.57	23.08	28.32	12.68	22.65	15.06	18	23.43	19.88	15.66	15.94	23.74	26.32	15.31	24.17	16.23	27.31
HBD_HUMAN	P02042	Hemoglobin subunit delta	0.11913	0.607019	0.820386	25.66	24.29	16.62	19.04	16.08	22.45	27.89	10.41	21.86	12.02	17.63	23.11	18.4	15.7	16.48	23.4	27.09	14.56	24	17.9	26.87
HEMO_HUMAN	P02790	Hemopexin	-0.119745	0.605151	0.820386	21.37	19.22	18.46	18.1	11.96	14.04	19.95	12.9	16.79	15.07	14.46	21.88	18.09	19.8	20.69	19.35	21.77	17.42	21.07	19	24.5
HIS1_HUMAN	P15515	Histatin-1	0.22333	0.330492	0.640329	19.73	25.97	13.62	25.9	24.38	24.03	16.8	15.03	21.22	23.93	20.88	19.72	20.57	18.84	25.41	20.8	21.54	19.86	24.55	25.08	21.39
HPT_HUMAN	P00738	Haptoglobin	0.517069	0.0163812	0.442966	21.71	22.24	18.57	17.01	16.87	18.92	19.08	22.17	22.36	20.05	17.46	19.31	18.02	17.83	20.91	21.68	21.73	18.58	18.58	20.98	22.92
HPTR_HUMAN	P00739	Haptoglobin-related protein	0.449563	0.0408895	0.446032	22.17	22.71	18.54	16.82	18.15	18.69	19.41	21.96	22	20.38	19.38	20.84	17.09	18.16	22.54	21.83	22.33	21.84	19.81	20.94	23.84
HS71L_HUMAN	P34931	Heat shock 70 kDa protein 1-like	-0.210411	0.359934	0.663191	21.49	21.4	24.72	21.91	23.58	23.11	22.39	21.71	23.93	22.74	21.63	23.65	23.47	21.8	21.17	23.34	21.33	20.97	20.06	20.51	22.96
HS902_HUMAN	Q14568	Putative heat shock protein HSP 90-alpha A2	-0.363564	0.105224	0.500985	21.63	19.38	22.53	20.77	22.34	20.06	21.23	22.13	20.58	20.42	20.62	22.08	22.15	20.2	21.51	18.74	19.56	21.29	21.14	22.03	20.27
HS904_HUMAN	Q58FG1	Putative heat shock protein HSP 90-alpha A4	-0.306051	0.177251	0.552935	21.14	19.6	21.82	20.58	22.16	19.6	20.5	21.37	20.62	20.01	18.83	21.71	21.78	19.13	20.92	17.8	17.05	19.74	20.4	21.57	18.5
HS90A_HUMAN	P07900	Heat shock protein HSP 90-alpha	-0.352944	0.116566	0.502753	20.53	18.84	21.66	20.94	20.86	17.46	18.59	20.94	18.73	18.92	20.15	21.1	21.77	19.56	20.34	17.92	18.71	21.1	19.36	19.56	18.1
HS90B_HUMAN	P08238	Heat shock protein HSP 90-beta	0.0123383	0.957667	0.977373	21.25	19.56	20.79	18.18	20.38	16.2	18.46	19.64	18.37	18.05	17.56	20.73	21.2	19.09	20.03	18.58	19.82	20.26	18.14	19.69	17.36
HSP71_HUMAN	P08107	Heat shock 70 kDa protein 1A/1B	-0.339859	0.131722	0.52061	20.76	18.99	23.23	20.6	21.51	19.98	18.37	21.66	19.95	19.69	19.77	22.22	22.43	19.79	20.46	20.31	18.26	20.11	18.23	18.12	19.86
HSP72_HUMAN	P54652	Heat shock-related 70 kDa protein 2	-0.189623	0.410358	0.663191	21.6	19.41	22.67	20.39	21.3	20.46	20.65	21.16	21.39	21.14	21.56	22.06	21.53	20.72	21.17	21.78	20.68	21.48	20.84	20.49	21.98
HSP76_HUMAN	P17066	Heat shock 70 kDa protein 6	-0.254651	0.265283	0.604588	22.73	18.41	22.69	22.21	21.24	20.75	20.56	21.95	22.39	21.31	22.21	22.98	22.43	20.69	21.98	21.71	18.83	21.99	21.5	22	20.37
HSP7C_HUMAN	P11142	Heat shock cognate 71 kDa protein	-0.25597	0.26273	0.604588	20.32	18.82	21.96	20.41	21.15	20.09	19.06	21.37	20.34	20.64	21.36	21.79	21.38	20.08	21.12	20.33	19.9	21.84	20.76	19.76	20.98
HSPB1_HUMAN	Q9UC36	Heat shock protein beta-1	0.332509	0.140824	0.537299	23.71	22.53	24.12	22.83	23.44	21.91	22.97	23.66	24.16	22.77	23.73	23.91	23.65	23.44	23.52	24.86	24.57	23.83	23.62	23.9	22.25
HV303_HUMAN	P01764	Ig heavy chain V-III region VH26	-0.240108	0.294467	0.62522	23.03	21.8	21.54	21.94	22.04	21.04	21.5	19.73	19.97	21.68	21.06	21.04	21.61	22.85	22.3	20.34	23.25	17.44	22.53	19.07	23.4
HV320_HUMAN	P01781	Ig heavy chain V-III region GAL	-0.0678614	0.770077	0.904532	22.67	21.44	21.62	21.45	23.8	23.04	21.51	23.16	23.33	20.05	20.52	23.29	23.65	23	22.37	20.66	21.45	22.96	22.7	20.35	23.51
IDHP_HUMAN	P48735	Isocitrate dehydrogenase [NADP], mitochondrial	-0.115283	0.61876	0.832618	18.45	14.1	18.34	18.73	16.44	17.44	15.92	21.23	21.54	17.34	15.39	21.55	21.02	16.36	18.83	16.3	15.76	17.85	14.72	18.38	17.1
IF4A1_HUMAN	P60842	Eukaryotic initiation factor 4A-I	-0.370455	0.0983081	0.500985	21.25	17.58	20.65	19.04	20.69	17.7	18.22	20	17.67	18.56	17.93	21.54	21.13	19.95	19.98	16.91	17.66	19.81	18.81	18.01	16.63
IF4A2_HUMAN	Q14240	Eukaryotic initiation factor 4A-II	-0.364816	0.103942	0.500985	21.34	19.17	20.44	19.97	21.26	19.93	20.13	19.65	19.24	18.89	19.32	21.67	21.05	19.33	20.23	18.1	18.23	20.5	19.43	19.73	17.48
IGHA1_HUMAN	P01876	Ig alpha-1 chain C region	0.0334058	0.885698	0.962587	28.41	27.86	27.87	26.85	28.47	27.54	28.37	26.71	27.32	27.96	26.6	26.8	28.17	28.49	28.6	28.43	27.86	26.95	27.43	27.1	28.27
IGHA2_HUMAN	P01877	Ig alpha-2 chain C region	0.00732405	0.974864	0.988398	28.23	27.7	27.69	26.55	28.22	27.21	27.96	26.25	26.87	27.56	26.15	26.42	28.01	28.3	28.42	28.23	27.54	26.55	27	26.56	27.89
IGHG1_HUMAN	P01857	Ig gamma-1 chain C region	-0.205607	0.371257	0.663191	24.57	25.15	25.75	25.55	25.1	24.9	24.91	24.74	24.57	24.51	24	26.13	25.34	23.43	24.87	24.29	24.71	25.04	24.83	25.95	26.99
IGHG2_HUMAN	P01859	Ig gamma-2 chain C region	-0.163017	0.480163	0.716593	22.19	24.58	24.84	25.11	23	24.89	23	22.66	23.79	22.11	21.56	24.45	23.65	21.53	23.79	23.07	23.57	23.4	24.49	23.51	26.38
IGHG3_HUMAN	P01860	Ig gamma-3 chain C region	-0.182503	0.428474	0.67042	22.23	24.7	25.3	25.16	24.32	24.1	23.14	24.47	23.88	23.49	22.7	25.08	24.41	22.49	24.17	22.49	24.61	23.01	24.36	25.04	27.04
IGHG4_HUMAN	P01861	Ig gamma-4 chain C region	0.0880845	0.704186	0.870924	23.11	24.12	23.78	23.46	21.86	21.24	23.26	24.17	23.43	19.92	21.04	23.05	23.76	22.08	21.49	23.05	22.63	23.72	23.7	22.49	26.18
IGHM_HUMAN	P01871	Ig mu chain C region	-0.444612	0.0434431	0.446032	22.22	20.97	24.55	23.58	22.6	23.3	23.29	23.29	21.64	18.17	20.5	23.92	23.94	20.97	23.28	20.61	19.67	23.75	23.28	22.09	24.34
IGKC_HUMAN	P01834	Ig kappa chain C region	-0.0904874	0.69648	0.870924	26.81	26.08	26.57	25.44	27.42	26.31	25.75	25.73	25.26	25.36	24.63	26.3	26.56	26.3	26.09	25.35	25.86	25.95	26.47	26.14	27.2
IL1F6_HUMAN	Q9UHA7	Interleukin-1 family member 6	-0.276308	0.225342	0.590381	22.71	21.46	22.75	22.75	21.2	18.36	17.64	20.85	20.21	18.55	17.93	22.37	22.12	21.21	22.09	19.22	17.74	22.42	21.7	18.84	21.46
IL1RA_HUMAN	P18510	Interleukin-1 receptor antagonist protein	-0.23987	0.29496	0.62522	21.86	20.54	23.07	22.15	19.25	21.45	17.24	20.64	21.2	16.1	16.58	22.58	22.54	21.41	22.04	18.52	21.59	22.46	17.87	19.23	22.28
ILEU_HUMAN	P30740	Leukocyte elastase inhibitor	-0.0387633	0.867511	0.95537	22.8	21.67	22.62	21.67	21.51	20.53	20.37	22.46	19.96	21.59	21.67	22.9	21.31	22.17	21.25	22.12	21	23.04	22.18	22.51	20.81
INVO_HUMAN	P07476	Involucrin	-0.463663	0.0342538	0.446032	21.08	17.91	22.2	21.33	21.51	21.07	20.66	22.15	19.95	19.27	20.64	22.78	22.42	19.94	22.21	18.49	18.86	22.87	21.75	19.29	19.7
IQGA1_HUMAN	P46940	Ras GTPase-activating-like protein IQGAP1	-0.406488	0.0674619	0.467572	17.36	15.6	19.95	17.47	17.58	12.55	14.59	17.69	14.58	15.54	14.94	19.72	20.33	19.27	19.2	13.43	15.81	18.1	17.96	16.7	15.54
ISK5_HUMAN	Q9NQ38	Serine protease inhibitor Kazal-type 5	-0.0879369	0.70466	0.870924	14.75	15.84	16.7	16.14	16.91	17.72	15.71	15.38	13.21	17.55	15.16	20.47	18.37	15.05	17.47	16.02	18.94	19.89	17.08	17.46	17.14
K1C10_HUMAN	P13645	Keratin, type I cytoskeletal 10	-0.448314	0.0415225	0.446032	23.58	22.82	24.91	22.67	25.21	24.54	23.33	23.42	22.78	24.54	24.6	23.32	23.53	25.08	25.1	21.66	22.74	24.05	24.24	24.33	25.56
K1C12_HUMAN	Q99456	Keratin, type I cytoskeletal 12	0.0386196	0.867998	0.95537	26.72	26.75	26.57	26.07	26.73	26.38	25.72	25.79	25.56	26.44	26.31	26.72	26.19	26.57	26.5	26.84	26.12	26.81	26.42	26.88	26.78
K1C13_HUMAN	P13646	Keratin, type I cytoskeletal 13	-0.139197	0.547331	0.773436	27.76	27.31	27.53	27.31	27.57	27.13	27.02	27.45	26.21	27.47	27.13	27.82	26.49	27.36	27.22	27.29	27.34	27.46	27	28.07	27.84
K1C14_HUMAN	P02533	Keratin, type I cytoskeletal 14	-0.14384	0.533913	0.767913	25.46	25.05	25.44	24.47	25.55	24.89	24.67	24	23.4	25.3	24.75	25.43	25.39	25.47	25.06	25.34	24.91	25.46	25.1	25.24	25.69
K1C15_HUMAN	P19012	Keratin, type I cytoskeletal 15	-0.111316	0.630961	0.839111	25.96	25.66	26.66	25.48	26.39	25.93	25.16	26.1	24.71	26.18	24.92	26.53	25.98	26.11	26.39	25.39	26.15	26.94	26.04	26.77	26.11
K1C16_HUMAN	P08779	Keratin, type I cytoskeletal 16	-0.360755	0.108142	0.500985	26.41	25.92	26.61	25.71	26.13	25.6	25.92	24.8	24.52	26.66	25.7	26.17	26.12	26.35	25.93	25.92	25.23	26.6	25.81	25.6	27
K1C17_HUMAN	Q8N1P6	Keratin, type I cytoskeletal 17	-0.350297	0.119526	0.506579	22.89	20.43	22.63	21.3	23.22	22.27	20.67	20.99	19.76	22.06	22.81	23.91	24.38	23.14	23.37	20.79	21.57	23.44	23.42	21.47	22.53
K1C18_HUMAN	P05783	Keratin, type I cytoskeletal 18	-0.486139	0.0254525	0.446032	19.08	17.45	19.76	22.88	21.1	19.45	19.04	20.58	16	18.67	19.94	20.06	20.03	20.61	20.21	19.7	17.08	20.43	19.38	17.65	17.99
K1C19_HUMAN	Q9P1Y4	Keratin, type I cytoskeletal 19	-0.537377	0.0119972	0.442966	22.1	21.36	23.17	22.59	22.61	22.18	23.8	22.48	20.76	22.87	22.03	23.96	23.3	23.17	23.48	23.09	22.33	23.1	21.93	21.7	23.22
K1C20_HUMAN	P35900	Keratin, type I cytoskeletal 20	-0.29399	0.195822	0.57134	27.67	26.92	27.53	27.35	27.69	26.96	27.37	24.81	24.71	27.75	27.24	28.22	27.55	27.74	26.97	26.79	27.43	28.22	27.43	28.52	28.01
K1C24_HUMAN	Q2M2I5	Keratin, type I cytoskeletal 24	-0.22168	0.334171	0.642437	19.61	27.3	22.08	21.92	20.82	16.32	16.95	19.74	21.98	23.21	24.8	23.33	22.91	20.77	22.29	18.3	16.43	21.89	22.09	14.32	23.2
K1C25_HUMAN	Q7Z3Z0	Keratin, type I cytoskeletal 25	-0.309767	0.171782	0.546714	25.57	24.9	26.58	25.45	26.23	26.36	25.95	24.97	24.79	26.87	26.49	24.64	24.88	26.38	26.51	26.11	25.19	26.19	25.33	25.51	27.49
K1C27_HUMAN	Q7Z3Y8	Keratin, type I cytoskeletal 27	-0.419764	0.0581734	0.446032	25.73	25.78	26.46	25.63	26.32	26.31	26.14	25.55	24.6	27.18	26.52	25.17	25.03	26.48	26.23	25.5	24.89	25.93	25.28	25.84	27.09
K1C28_HUMAN	Q7Z3Y7	Keratin, type I cytoskeletal 28	-0.309767	0.171782	0.546714	25.57	24.9	26.58	25.45	26.23	26.36	25.95	24.97	24.79	26.87	26.49	24.64	24.88	26.38	26.51	26.11	25.19	26.19	25.33	25.51	27.49
K22E_HUMAN	P35908	Keratin, type II cytoskeletal 2 epidermal	-0.458926	0.036381	0.446032	24.51	22.25	25.5	22.92	25.11	24.22	24.27	23.71	21.09	25.12	24.41	24.75	24.55	24.93	25.52	23.53	23.85	24.7	23.15	24.52	24.91
K22O_HUMAN	Q01546	Keratin, type II cytoskeletal 2 oral	-0.276771	0.224533	0.590381	23.07	20.12	24.82	21.09	23.57	21.68	21.94	23.52	20.53	23.3	22.7	25.3	25.14	22.65	23.95	22.54	22.11	23.58	22.61	23.13	22.33
K2C1_HUMAN	P04264	Keratin, type II cytoskeletal 1	-0.396439	0.0752073	0.478241	24.29	22.23	24.66	22.88	24.23	24.11	23.74	22.98	21.9	24.64	24.58	24.04	24.19	25.09	25.24	23.31	23.53	25.06	24.58	24.17	24.96
K2C1B_HUMAN	Q7Z794	Keratin, type II cytoskeletal 1b	0.123566	0.593599	0.817848	24.5	23.28	25.42	20.5	24.52	23.61	23.21	24.15	22.79	22.67	22.19	24.68	24.52	22.44	24.58	24.52	22.47	24.64	23.41	24.61	22.14
K2C3_HUMAN	P12035	Keratin, type II cytoskeletal 3	-0.111706	0.629757	0.839111	25.9	25.01	26.34	23.29	24.83	23.92	25.37	25.24	21.94	26.15	24.97	26.24	25.82	24.85	25.83	25.4	25.77	25.65	25.37	25.12	25.15
K2C4_HUMAN	P19013	Keratin, type II cytoskeletal 4	-0.271308	0.234191	0.601477	27.01	26.35	27.06	26.54	26.51	25.97	26.72	26.46	25.31	26.75	26.61	27.58	26.69	27.08	26.85	27.38	26.63	26.38	26.16	27.29	27.63
K2C5_HUMAN	P13647	Keratin, type II cytoskeletal 5	0.276222	0.225491	0.590381	25.39	24.31	25.3	23.43	25.68	24.72	24.08	24.7	23.46	24.66	24.08	25.31	24.93	24.3	25.02	25.56	25.38	24.95	24.8	25.72	24.42
K2C6A_HUMAN	P02538	Keratin, type II cytoskeletal 6A	0.130952	0.571532	0.800692	26.82	25.96	26.64	24.79	26.8	25.41	25.47	25.62	24.47	26.5	25.6	26.26	26.28	26.32	26.17	26.81	26.05	26.29	26.09	26.46	26.37
K2C6B_HUMAN	P04259	Keratin, type II cytoskeletal 6B	0.1255	0.587784	0.812092	26.45	25.47	26.24	24.52	26.61	25.24	25.47	25.43	24.31	26.26	25.53	26.11	26.12	26.04	26.02	26.52	25.95	26.3	25.94	26.19	26.2
K2C6C_HUMAN	P48668	Keratin, type II cytoskeletal 6C	0.144492	0.532042	0.767913	26.38	25.61	26.31	24.51	26.56	25.16	25.1	25.53	24.22	26.22	25.35	26.09	26.12	26.22	25.95	26.67	25.87	26.03	25.8	26.1	26.01
K2C7_HUMAN	P08729	Keratin, type II cytoskeletal 7	-0.442367	0.0446407	0.446032	28.09	26.92	27.93	27.97	27.22	26.69	27.28	26.06	23.33	27.78	27.78	27.5	27.13	28.11	27.4	27.14	27.21	27.44	26.45	27.56	28.44
K2C71_HUMAN	Q3SY84	Keratin, type II cytoskeletal 71	-0.264201	0.247153	0.604588	27.25	26.78	27.53	27.07	26.39	25.99	27.32	26.25	23.2	28.01	27.39	26.98	26.43	27.42	26.81	27.78	27.31	26.99	25.72	27.23	27.66
K2C72_HUMAN	Q14CN4	Keratin, type II cytoskeletal 72	-0.114767	0.620341	0.832618	26.55	25.67	26.42	22.88	26.18	23.86	25.17	23.95	21.21	25.38	25.74	26.15	25.83	26.37	26.19	26.19	25.79	24.57	25.52	26.27	25.78
K2C73_HUMAN	Q86Y46	Keratin, type II cytoskeletal 73	-0.342837	0.128155	0.52061	27.24	26.84	27.64	26.92	26.75	25.66	27.21	26.21	22.87	27.91	27.37	27.08	26.39	27.58	27.04	27.85	26.24	26.45	25.72	27.13	27.6
K2C74_HUMAN	Q7RTS7	Keratin, type II cytoskeletal 74	-0.264201	0.247153	0.604588	27.25	26.78	27.53	27.07	26.39	25.99	27.32	26.25	23.2	28.01	27.39	26.98	26.43	27.42	26.81	27.78	27.31	26.99	25.72	27.23	27.66
K2C75_HUMAN	O95678	Keratin, type II cytoskeletal 75	0.109722	0.63589	0.839111	26.45	25.52	26.6	23.57	26.49	24.85	25.11	25.34	23.1	25.36	24.79	26.1	25.82	25.29	26.04	26.67	25.82	25.54	25.48	26.29	25.43
K2C78_HUMAN	Q8N1N4	Keratin, type II cytoskeletal 78	-0.306497	0.17659	0.552935	24.15	22.66	24.18	22.79	22.95	21.26	22.99	23.47	20.81	22.64	23.25	24.37	23.69	22.53	23.91	22.4	23.14	23.45	23.06	23.72	22.82
K2C79_HUMAN	Q5XKE5	Keratin, type II cytoskeletal 79	-0.254461	0.265653	0.604588	26.63	25.63	26.92	24.49	26.63	24.81	25.75	25.05	21.91	26.83	26.07	26.45	26.09	26.56	26.54	25.9	25.86	25.62	25.68	26.65	26.37
K2C8_HUMAN	Q6P4C7	Keratin, type II cytoskeletal 8	0.0816445	0.724973	0.883505	25.8	23.96	26.2	22.93	26	25.24	24.83	24.87	23.08	25.15	24.16	26.05	25.84	24.25	25.51	25.42	25.67	26.22	25.22	25.96	24.78
K2C80_HUMAN	Q6KB66	Keratin, type II cytoskeletal 80	-0.555751	0.00890258	0.442966	22.17	22.25	22.3	20.63	19.69	18.34	21.6	18.09	16.83	20.02	19.39	22.09	22.51	21.2	21.34	17.8	19.46	18.72	17.79	19.98	19.5
KCY_HUMAN	P30085	UMP-CMP kinase	-0.425328	0.0545839	0.446032	10.9	15.57	23.06	17.2	19.46	15.26	14.96	19.83	15.3	15.69	17.59	14.81	19.66	15.48	18.48	11.03	12.94	18.66	14.98	16.31	20.49
KLK1_HUMAN	P06870	Kallikrein-1	0.209466	0.362147	0.663191	24.21	24.92	24.48	22.39	25.41	25.91	23.94	23.46	23.41	24.28	21.72	25.7	25.88	24.67	25	25.3	25.33	24.02	24.68	24.97	23.16
KLK10_HUMAN	O43240	Kallikrein-10	-0.0264136	0.909515	0.969405	17.95	14.73	16.09	15.08	16.53	17.46	17.51	20.59	18.03	17.76	19.23	21.14	21.92	19.42	20.54	15.97	18.89	22.04	21.84	15.44	17.24
KPYM_HUMAN	Q9BWB5	Pyruvate kinase isozymes M1/M2	-0.562594	0.00793232	0.442966	21.49	20.49	22.11	21.32	21.15	20.47	20.89	21.46	19.19	20.83	21.26	22.05	21.72	21.68	21.74	20.05	20.16	21.72	21.74	20.9	20.2
KPYR_HUMAN	P30613	Pyruvate kinase isozymes R/L	-0.37913	0.0900829	0.499732	21.63	22.24	22.34	22.16	22.15	22.18	22.59	22.48	19.5	22.1	23.09	22.27	21.9	20.42	22.67	22.31	19.86	22.09	21.65	20.97	21.95
KRT36_HUMAN	O76013	Keratin, type I cuticular Ha6	-0.417771	0.0595014	0.446032	16.79	15.87	23.1	21.48	21.93	16.93	23.68	21.93	17.93	22.75	24.05	22	22.77	22.11	22.59	21.13	19.73	22.11	18.33	23.31	25.37
KRT84_HUMAN	Q9NSB2	Keratin, type II cuticular Hb4	-0.555984	0.00886791	0.442966	25.69	21.51	25.63	24.57	24.5	22.76	24.98	24.42	19.72	25.68	26	25.05	25.41	25.22	25.1	21.77	22.24	25.11	23.62	25.35	26.36
KTDAP_HUMAN	P60985	Keratinocyte differentiation-associated protein	-0.223704	0.329662	0.640329	18.43	19.21	17.44	13.23	16.85	18.27	15.47	14.91	14.76	13.16	12.63	19.54	18.85	17.16	13.75	13.81	11.3	15.24	14.63	13.93	15.1
KV104_HUMAN	P01596	Ig kappa chain V-I region CAR	-0.241748	0.29108	0.62522	23	21.49	22.42	19.81	20.82	17.21	21.19	20.53	20.4	18.71	14.07	21.58	21.78	22.74	22.77	18.59	19.7	17.92	17.02	20.55	22.61
KV106_HUMAN	P01598	Ig kappa chain V-I region EU	0.339421	0.132252	0.52061	21.86	21.29	20.44	18.84	22.17	19.77	17.97	20.84	21.68	20.13	18.19	21.7	21.59	21.35	21.01	21.47	21.41	21.82	22.7	18.33	23.4
KV108_HUMAN	P01600	Ig kappa chain V-I region Hau	-0.23685	0.301265	0.62522	23.45	21.9	22.93	20.45	21.44	18.2	22.04	21.69	21.3	20.12	15.43	22.54	22.89	23.36	23.36	19.26	21.45	18.57	17.35	20.66	23.48
KV109_HUMAN	P01601	Ig kappa chain V-I region HK101	-0.23685	0.301265	0.62522	23.45	21.9	22.93	20.45	21.44	18.2	22.04	21.69	21.3	20.12	15.43	22.54	22.89	23.36	23.36	19.26	21.45	18.57	17.35	20.66	23.48
KV110_HUMAN	P01602	Ig kappa chain V-I region HK102	0.339421	0.132252	0.52061	21.86	21.29	20.44	18.84	22.17	19.77	17.97	20.84	21.68	20.13	18.19	21.7	21.59	21.35	21.01	21.47	21.41	21.82	22.7	18.33	23.4
KV117_HUMAN	P01609	Ig kappa chain V-I region Scw	-0.23685	0.301265	0.62522	23.45	21.9	22.93	20.45	21.44	18.2	22.04	21.69	21.3	20.12	15.43	22.54	22.89	23.36	23.36	19.26	21.45	18.57	17.35	20.66	23.48
KV123_HUMAN	P04431	Ig kappa chain V-I region Walker	-0.23685	0.301265	0.62522	23.45	21.9	22.93	20.45	21.44	18.2	22.04	21.69	21.3	20.12	15.43	22.54	22.89	23.36	23.36	19.26	21.45	18.57	17.35	20.66	23.48
KV201_HUMAN	P01614	Ig kappa chain V-II region Cum	-0.29815	0.189275	0.565355	24.35	23.63	23.48	23.15	22.18	23.47	24.13	21.56	19.03	23.17	21.49	23.6	23.23	24.01	23.82	23.37	24.13	21.72	23.91	21.73	24.58
KV204_HUMAN	P01617	Ig kappa chain V-II region TEW	-0.29815	0.189275	0.565355	24.35	23.63	23.48	23.15	22.18	23.47	24.13	21.56	19.03	23.17	21.49	23.6	23.23	24.01	23.82	23.37	24.13	21.72	23.91	21.73	24.58
KV205_HUMAN	P06309	Ig kappa chain V-II region GM607	-0.29815	0.189275	0.565355	24.35	23.63	23.48	23.15	22.18	23.47	24.13	21.56	19.03	23.17	21.49	23.6	23.23	24.01	23.82	23.37	24.13	21.72	23.91	21.73	24.58
KV206_HUMAN	P06310	Ig kappa chain V-II region RPMI 6410	0.0384146	0.868693	0.95537	22.53	22.12	19.41	22.32	21.86	21.4	22.63	20.66	20.89	21.88	21.83	19.34	20.47	23.55	23.15	21.72	22.23	22.54	23.7	20.11	23.9
KV302_HUMAN	P01620	Ig kappa chain V-III region SIE	-0.167768	0.46728	0.709107	24	22.59	23.26	21.83	22.88	21.01	23.28	21.9	22.63	22.05	19.57	23.37	23.53	23.57	23.55	22.08	22.81	21.54	21.18	22.49	24.53
KV303_HUMAN	P01621	Ig kappa chain V-III region NG9	0.0272622	0.90662	0.969405	13.73	20.84	20.88	19.11	19.68	16.51	20.27	28.55	20.65	18.63	16.11	21.27	19.91	19.16	16.35	17.11	17.68	29.91	22.39	13.6	24
KV304_HUMAN	P01622	Ig kappa chain V-III region Ti	-0.234045	0.307195	0.627031	23.94	22.48	23.33	21.3	22.46	20.13	22.72	21.35	22.19	21.18	18.2	23.31	23.42	23.51	23.6	21	22.02	20.73	20.06	22.15	24.25
KV305_HUMAN	P01623	Ig kappa chain V-III region WOL	-0.167768	0.46728	0.709107	24	22.59	23.26	21.83	22.88	21.01	23.28	21.9	22.63	22.05	19.57	23.37	23.53	23.57	23.55	22.08	22.81	21.54	21.18	22.49	24.53
KV307_HUMAN	P04206	Ig kappa chain V-III region GOL	-0.234045	0.307195	0.627031	23.94	22.48	23.33	21.3	22.46	20.13	22.72	21.35	22.19	21.18	18.2	23.31	23.42	23.51	23.6	21	22.02	20.73	20.06	22.15	24.25
KV308_HUMAN	P04207	Ig kappa chain V-III region CLL	-0.109654	0.6361	0.839111	23.19	22.95	22.42	22.8	23.39	22.9	23.92	22.69	21.31	23.32	22.37	23.24	23.3	23.43	23.14	22.88	23.56	22.99	23.3	23.33	24.56
KV309_HUMAN	P04433	Ig kappa chain V-III region VG	-0.198047	0.389478	0.663191	23.49	21.88	23.3	21.48	21.85	19.39	22.81	21.78	21.72	21.87	17.92	22.81	22.97	23.4	23.52	21.45	22.72	20.23	19.17	22.06	23.88
KV310_HUMAN	P04434	Ig kappa chain V-III region VH	-0.286837	0.207432	0.587921	23.98	22.11	22.99	20.92	21.09	17.98	22.78	21.96	19.63	20.82	15.97	23.14	23.28	24.2	24.14	19.37	22.55	19.19	17.86	21.37	23.74
KV312_HUMAN	P18135	Ig kappa chain V-III region HAH	-0.0695705	0.764442	0.903529	19.79	21.47	22.19	20.45	21.32	18.56	21.74	24.78	21.62	20.24	17.46	22.34	21.94	21.65	20.54	19.43	20.38	24.32	20.91	18.54	24.12
KV313_HUMAN	P18136	Ig kappa chain V-III region HIC	-0.0695705	0.764442	0.903529	19.79	21.47	22.19	20.45	21.32	18.56	21.74	24.78	21.62	20.24	17.46	22.34	21.94	21.65	20.54	19.43	20.38	24.32	20.91	18.54	24.12
KV401_HUMAN	P06312	Ig kappa chain V-IV region	-0.162827	0.480681	0.716593	22.66	21.7	22.51	21.16	22.05	20.25	20.69	22.1	21.45	21.12	17.09	22.64	22.65	22.38	22.39	20.26	21.16	19.99	19.83	20.66	23.05
KV402_HUMAN	P01625	Ig kappa chain V-IV region Len	-0.162827	0.480681	0.716593	22.66	21.7	22.51	21.16	22.05	20.25	20.69	22.1	21.45	21.12	17.09	22.64	22.65	22.38	22.39	20.26	21.16	19.99	19.83	20.66	23.05
KV403_HUMAN	P06313	Ig kappa chain V-IV region JI	-0.162827	0.480681	0.716593	22.66	21.7	22.51	21.16	22.05	20.25	20.69	22.1	21.45	21.12	17.09	22.64	22.65	22.38	22.39	20.26	21.16	19.99	19.83	20.66	23.05
KV404_HUMAN	P06314	Ig kappa chain V-IV region B17	-0.162827	0.480681	0.716593	22.66	21.7	22.51	21.16	22.05	20.25	20.69	22.1	21.45	21.12	17.09	22.64	22.65	22.38	22.39	20.26	21.16	19.99	19.83	20.66	23.05
LAC_HUMAN	P01842	Ig lambda chain C regions	0.0590192	0.799403	0.924251	22.56	24.94	23.09	18.66	19.48	16.77	24.67	21.64	21.45	21.87	20.56	24.62	23.32	24.49	23.8	25.02	22.76	22.93	21.88	24.78	24.42
LAC6_HUMAN	P0CF74	Ig lambda-6 chain C region	-0.167688	0.467496	0.709107	27.5	27.14	27.2	26.45	28.56	27.7	26.89	27.4	28.42	26.54	26.43	27.89	27.96	27.6	27.6	25.72	26.15	26.96	27.26	26.89	27.98
LAC7_HUMAN	A0M8Q6	Ig lambda-7 chain C region	-0.167688	0.467496	0.709107	27.5	27.14	27.2	26.45	28.56	27.7	26.89	27.4	28.42	26.54	26.43	27.89	27.96	27.6	27.6	25.72	26.15	26.96	27.26	26.89	27.98
LC1L1_HUMAN	Q5VSP4	Putative lipocalin 1-like protein 1	-0.145688	0.528615	0.767913	20.76	23.51	23.63	25.34	21.64	22.92	24.48	24.07	24.94	22.25	22.77	23.31	23.17	22.41	24.09	22.91	23.12	25.17	24.6	23.61	25.42
LCN1_HUMAN	P31025	Lipocalin-1	-0.0454684	0.844842	0.947647	19.64	21.18	21.64	23.92	17.18	19.07	23.31	22.15	23.78	19.74	19.79	19.3	19.74	19.78	21.65	19.32	22.15	24.28	23.72	20.98	25.29
LDHA_HUMAN	P00338	L-lactate dehydrogenase A chain	-0.0224702	0.922982	0.971163	17.45	14.61	17.08	16.09	16.77	13.37	13.38	16.39	14.63	14.62	18	17.39	19.29	18.17	18.46	17.38	17.82	18.45	17.27	16.44	18.19
LEG3_HUMAN	P17931	Galectin-3	-0.255096	0.264419	0.604588	22.06	19.56	21.91	21.1	19.84	20.86	20.71	22.94	20.53	21.63	19.3	22.43	22.08	21.92	21.71	20.67	20.19	22.33	21.6	19.11	21.38
LEG7_HUMAN	P47929	Galectin-7	-0.451132	0.040105	0.446032	22.24	22.01	23.94	22.92	22.64	20.32	24.04	21.83	21.12	22.82	23.79	23.64	23.36	23.08	23.14	23	22.92	21.8	21.32	23.41	22.06
LG3BP_HUMAN	Q08380	Galectin-3-binding protein	0.037284	0.872527	0.95736	20.81	21.03	19.69	20.02	20.86	22.05	20.98	21.12	21.28	21.27	21.36	20.72	21.47	21.11	22.03	19.94	20.3	20.91	21.47	21.28	20.57
LKHA4_HUMAN	P09960	Leukotriene A-4 hydrolase	-0.0293013	0.899669	0.969405	21	17.25	20.28	16.64	16.67	17.28	16.68	21.27	16.01	18.32	15.45	15.49	18.33	19.44	17.05	15.82	13.46	20.73	20.56	18.14	16.95
LMNA_HUMAN	P02545	Lamin-A/C	-0.263776	0.247943	0.604588	18.96	14.46	21.35	17.88	19.45	19.55	17.33	21.04	17.34	17.14	19.1	20.06	20.45	18.35	21.41	18.51	19.19	19.87	18.75	16.21	16.11
LPLC1_HUMAN	Q9H4V6	Long palate, lung and nasal epithelium carcinoma-associated protein 1	-0.323555	0.152503	0.546714	18.76	15.89	19.7	20.29	14.85	19.47	20.52	20.01	19.45	15.08	16.18	15.65	15.57	16.82	22.59	15.39	17.26	20.99	20.07	14.43	21.24
LYSC_HUMAN	P61626	Lysozyme C	0.465212	0.0335796	0.446032	25.86	25.76	25.55	25.07	26.21	25.43	24.67	26.68	26.07	25.85	25.34	27.46	26.37	25.02	26.47	28.92	27.99	26.55	26.82	25.22	22.43
MDHM_HUMAN	P40926	Malate dehydrogenase, mitochondrial	-0.180406	0.433887	0.671995	19.67	17.76	19.69	18.26	18.31	16.3	17.37	18.79	17.24	16.35	18.32	18.21	17.98	17.62	19	16.77	18.52	18.44	19.71	13.66	14.4
ML12A_HUMAN	P19105	Myosin regulatory light chain 12A	0.120119	0.604018	0.820386	21.94	22.93	21.79	18.48	21.66	18.08	18.7	21.83	19.07	18.72	18.9	20.14	21.15	20.62	21.16	19.64	19.19	22	21.3	19.14	17.41
ML12B_HUMAN	O14950	Myosin regulatory light chain 12B	0.120119	0.604018	0.820386	21.94	22.93	21.79	18.48	21.66	18.08	18.7	21.83	19.07	18.72	18.9	20.14	21.15	20.62	21.16	19.64	19.19	22	21.3	19.14	17.41
MMP9_HUMAN	P14780	Matrix metalloproteinase-9	0.0827374	0.721432	0.883505	22.29	22.3	19	19.85	14.73	16.76	16.56	18.25	15.93	19.61	16.36	19.52	17.5	20.52	19.82	22.02	18.63	17.58	21.6	16.2	15.95
MOES_HUMAN	P26038	Moesin	-0.0695496	0.764511	0.903529	21.19	18.19	20.49	17.35	18.32	19.43	18.04	21.36	17.15	16.21	16.32	18.47	19.14	20.04	20.23	17.97	18.09	18.62	20.77	18.85	17.72
MUC5B_HUMAN	Q7M4S5	Mucin-5B	0.0204327	0.929949	0.971163	24.48	24.82	24.29	24.92	24.04	25.1	24.83	24.29	24.84	24.42	25.21	23.71	24.46	24.28	24.68	24.22	25.1	24.36	24.4	24.42	24.55
MUC7_HUMAN	Q8TAX7	Mucin-7	0.234385	0.306471	0.627031	24.51	25.33	24.06	24.37	24.71	25.24	23.13	23.93	22.22	24.63	24.45	24.58	25.06	25.08	25.21	26.67	25.85	24.51	25.11	23.82	24.59
MUCB_HUMAN	P04220	Ig mu heavy chain disease protein	-0.469565	0.0317408	0.446032	22.6	20.49	24.74	23.9	23.61	22.77	23.24	23.45	22.49	18.86	21.3	24.13	24.1	22.36	23.3	20.97	19.63	23.84	23.04	23.51	24.39
MYG_HUMAN	P02144	Myoglobin	-0.0159491	0.945295	0.976851	26.03	24.33	18.82	21.87	24.07	18.59	23.22	24.05	21.29	22.96	25.47	21.69	22.63	26.06	23.18	19.06	22.88	23.4	25.1	19.62	25.05
MYH10_HUMAN	P35580	Myosin-10	0.0355622	0.878371	0.959434	21.56	17.8	21.14	18.97	20.63	18.08	18.79	21.02	16.54	20.2	19.75	21.29	21.12	19.31	20.65	22.74	19.14	20.7	19.57	19.76	17.69
MYH11_HUMAN	P35749	Myosin-11	-0.0134386	0.953896	0.977373	22.11	19.6	20.06	20.15	19.83	17.09	18.81	21.12	17.41	21.5	21.21	21.49	21.2	22.04	21.51	22.46	19.72	20.63	20.33	20.41	19.87
MYH14_HUMAN	Q9H882	Myosin-14	-0.0134386	0.953896	0.977373	22.11	19.6	20.06	20.15	19.83	17.09	18.81	21.12	17.41	21.5	21.21	21.49	21.2	22.04	21.51	22.46	19.72	20.63	20.33	20.41	19.87
MYH9_HUMAN	P35579	Myosin-9	0.0962853	0.678008	0.868971	18.28	19.19	19.57	16.21	17.35	14.86	15.09	18.14	15.77	16.31	15.33	18.71	18.47	17.29	17.5	18.05	17.02	17.19	18.28	16.69	14.26
MYL6_HUMAN	P60660	Myosin light polypeptide 6	0.15794	0.494123	0.731597	22.94	22.39	23.47	22.48	23.06	21.85	22.33	23.1	21.72	22.61	22.59	22.69	22.47	22.75	22.34	23.56	22.91	22.93	22.26	23.46	21.5
NAMPT_HUMAN	P43490	Nicotinamide phosphoribosyltransferase	-0.380278	0.0890341	0.499732	16.54	16.45	18.65	17.23	19.44	16.61	16.77	16.54	14.43	13.85	16.14	14.67	14.08	19.6	19.38	15.29	14.96	16.21	17.02	18.84	14.94
NCRP1_HUMAN	Q6ZVX7	Non-specific cytotoxic cell receptor protein 1 homolog	-0.258554	0.257774	0.604588	19.82	15.62	20.28	18.41	19.37	16.1	13.31	19.79	15.76	18.71	16.77	20.98	20.09	17.72	19.57	14.47	16.03	17.33	18.35	17.09	13.01
NDK8_HUMAN	O60361	Putative nucleoside diphosphate kinase	0.313204	0.166826	0.546714	21.99	18.86	21.73	19.15	21.3	19.8	19.38	21.94	20.72	19.85	19.19	21.27	21.56	19.64	20.8	20.55	22.46	22.26	20.92	20.85	20.66
NDKA_HUMAN	P15531	Nucleoside diphosphate kinase A	-0.0141275	0.951535	0.977373	18.78	18.95	21.5	20.32	20.07	20.59	19.66	21.15	20.86	20.32	20.26	21.73	21.44	19.47	21.23	20.5	21.98	22.32	20.57	20.24	20.57
NDKB_HUMAN	P22392	Nucleoside diphosphate kinase B	0.190854	0.407271	0.663191	18.8	18.43	20.06	18.29	20.03	19.27	18.11	21.08	19.75	18.87	18.82	20.57	21.08	18.37	20.23	19.59	20.3	21.96	18.91	19.7	21.22
NDRG1_HUMAN	Q92597	Protein NDRG1	0.0455728	0.84449	0.947647	15.37	11.24	19.79	3.39	20.04	19.56	15.76	20.15	12.15	15.08	9.78	20.49	20.86	17.14	14.97	19.79	13.09	20.43	15.05	7	13.16
NGAL_HUMAN	P80188	Neutrophil gelatinase-associated lipocalin	0.147554	0.523289	0.763386	21.93	19.21	14.34	17.04	16.16	12.55	15.37	19.29	17	15.94	14.38	20.71	20.18	14.79	20.94	17.3	15.24	19.14	18.03	14.63	13.82
NIBL1_HUMAN	Q96TA1	Niban-like protein 1	-0.328569	0.145883	0.544046	19.1	17.74	20.91	20.51	20.09	15.78	18.25	21.08	17.08	19.4	19.28	21.82	21.24	18.28	20.58	15.87	18.56	21.09	20.12	20	16.78
NUCB2_HUMAN	P80303	Nucleobindin-2	-0.0940898	0.684982	0.870924	21.5	22.58	22.35	23.29	21.14	22.37	21.86	22.6	22.01	21.63	22.81	20.36	20.81	22.26	22.79	20.99	22.53	22.86	23.11	22.65	21.64
OTUB1_HUMAN	Q96FW1	Ubiquitin thioesterase OTUB1	0.143912	0.533707	0.767913	16.89	15.77	15.56	13.35	17.58	12.45	16.79	13.21	15.21	12.97	8.87	17.63	20.27	16.15	13.77	14.95	15.56	19.69	14.9	16.09	11.2
PCBP1_HUMAN	Q15365	Poly(rC)-binding protein 1	-0.324811	0.150825	0.546714	20.89	20.61	21.13	20.46	20.82	17.9	20.27	21.04	15.89	18.9	20.17	21.61	21.4	19.85	20.53	16.25	21.29	20.81	19.94	20.72	17.34
PDIA1_HUMAN	P07237	Protein disulfide-isomerase	-0.299409	0.187322	0.565355	22.56	20.71	22.59	21.87	21.55	20.47	21.05	22.41	20.48	20.53	21.97	22.2	21.8	22.07	21.97	21.15	21.68	22.49	21.92	21.95	21.92
PDIA3_HUMAN	P30101	Protein disulfide-isomerase A3	-0.243483	0.287524	0.62522	21.25	17.82	20.99	19.91	19.26	18.02	18.78	20.35	17.04	17.54	18.72	21.09	20.66	19.68	21.03	20.84	18.17	21.18	19.6	18.91	18.16
PDIA6_HUMAN	Q15084	Protein disulfide-isomerase A6	-0.221687	0.334154	0.642437	20.4	18.14	20.21	18.27	17.69	17.1	17.1	18.74	16.83	15.68	16.1	20.36	19.75	18.67	19.37	18.79	17.47	17.84	16.33	19.43	18.12
PEBP1_HUMAN	P30086	Phosphatidylethanolamine-binding protein 1	-0.167728	0.46739	0.709107	18.87	16.57	21.87	20.9	20.75	20.92	20.75	22.09	17.66	19.4	20.89	19.52	19.65	18.42	21.52	20.28	20.25	22.07	21.38	22.81	21.92
PEPL_HUMAN	O60437	Periplakin	-0.224753	0.327338	0.640329	21.91	19.31	22.02	21.37	20.44	17.98	20.11	20.83	17.88	20.12	19.5	22.4	21.45	21.13	21.46	21.05	21.52	21.32	20.3	20.89	18.94
PERL_HUMAN	P22079	Lactoperoxidase	-0.259905	0.255207	0.604588	21.7	22.53	22.44	23.48	23.03	22.54	23.57	22.1	21.63	22.97	22.74	21.43	21.11	22.83	22.84	22.38	22.71	22.23	22.41	23.19	22.68
PERM_HUMAN	P05164	Myeloperoxidase	-0.201702	0.380607	0.663191	22.83	21.91	21.67	18.34	19.59	17.88	20.71	21.9	16.24	18.65	17.08	22.38	21.19	21.74	21.45	20.44	16.91	19.93	20.93	19.33	17.51
PGAM1_HUMAN	P18669	Phosphoglycerate mutase 1	-0.431743	0.0506593	0.446032	19.82	19.8	20.81	20.23	20.66	19.42	20.52	20.64	18.78	19.25	19.79	21.68	21.23	19.96	20.17	18.82	19.42	21.39	20.85	19.83	20.11
PGAM2_HUMAN	P15259	Phosphoglycerate mutase 2	-0.313307	0.16668	0.546714	21.64	19.07	21.69	19.93	20.24	18.87	21.69	20.24	19.95	21.59	22.33	22.43	21.84	20.46	19.69	20.36	19.85	21.32	21.49	19.11	21.4
PGAM4_HUMAN	Q8N0Y7	Probable phosphoglycerate mutase 4	-0.555682	0.0089128	0.442966	20.77	19.65	20.87	21.31	20.48	20.66	20.36	20.28	18.47	19.38	19.89	21.69	21.3	20.99	21.01	19.72	19.52	21.34	21.11	20.36	21.11
PGK1_HUMAN	P00558	Phosphoglycerate kinase 1	-0.329545	0.144618	0.543412	22.28	21.23	22.61	22.39	21.66	22.12	21	22.16	21.06	21.76	22.68	21.72	21.48	22.13	21.31	21.33	21.52	22.44	22.41	21.3	22.24
PIGR_HUMAN	P01833	Polymeric immunoglobulin receptor	-0.209815	0.361329	0.663191	25.98	24.55	25.52	25.28	25.51	25.36	25.69	24.78	24.78	24.13	24.64	24.93	25.74	25.6	25.57	25.25	25.91	24.94	25.49	23.32	25.68
PIP_HUMAN	P12273	Prolactin-inducible protein	-0.39165	0.0791238	0.485449	25.89	26	26.99	26.45	26.65	26.84	26.09	26.88	25.75	26.56	26.35	25.88	26.32	26.88	27.16	25.39	26.22	26.51	26.89	26	25.41
PKP1_HUMAN	Q13835	Plakophilin-1	-0.288926	0.203994	0.583573	22.01	21.12	22.35	21.4	21.75	19.62	21.57	22.15	18.26	20.93	21.32	22.89	22.7	21.02	21.68	20.53	22.04	22.18	20.95	21.39	20.88
PKP3_HUMAN	Q9Y446	Plakophilin-3	-0.379111	0.0901002	0.499732	15.66	20.81	18.4	17.22	16.44	14.07	15.72	11.92	11.66	15.43	11.85	20.8	20.54	19.26	16.42	11.53	17.72	14.08	15.81	11.56	11.27
PLAK_HUMAN	P14923	Junction plakoglobin	-0.313818	0.165952	0.546714	22.69	20.76	23.22	22.31	22.09	20.55	21.61	22.58	19.9	21.96	21.96	23.25	22.83	21.59	22.48	21.77	21.95	22.48	21.86	22.68	21.75
PLIN3_HUMAN	O60664	Perilipin-3	0.162674	0.481099	0.716593	15.39	16.12	17.41	16.36	14.81	16.54	15.52	15.69	15.06	15.13	15.23	19.59	18.65	16.01	11.99	19.1	18.05	15.95	16.13	16.7	14.17
PLSI_HUMAN	Q14651	Plastin-1	-0.321159	0.155739	0.546714	20.01	16.69	21.89	21.99	19.96	17.36	13.8	20.85	17.34	17.03	18.31	21.76	21.5	15.67	20.81	13.04	17.98	21.56	18.06	18.11	17.36
PLSL_HUMAN	P13796	Plastin-2	-0.311395	0.169422	0.546714	20.28	20.19	22.17	15.46	17.18	16.28	18.13	20.91	14.99	14.96	16.35	21.39	18.99	21.32	20.87	17.99	14.04	19.48	21.47	17.77	17.99
PLST_HUMAN	P13797	Plastin-3	-0.489188	0.0244121	0.446032	16.72	14.29	20.87	18.74	15.25	14.82	13.56	17.45	14.92	14.72	18.03	21.61	19.43	15.88	18.67	13.61	16.57	18.54	17.69	15	14.47
PNPH_HUMAN	P00491	Purine nucleoside phosphorylase	-0.18602	0.419474	0.663191	19.04	16.15	19.89	16.55	17.47	16.59	14.96	20.68	16.16	17.69	16.11	20.93	19.89	20.77	21.38	18.17	16.45	19.58	20.8	16.71	17.33
POF1B_HUMAN	Q8WVV4	Protein POF1B	-0.362044	0.106796	0.500985	18.88	15.14	20.29	15.37	16.83	13.56	13.59	16.87	13.06	13.31	13.9	19.21	21.22	15.9	20.7	15	12.83	16.62	14.23	15.07	15.24
POTEE_HUMAN	Q6S8J3	POTE ankyrin domain family member E	-0.0436658	0.850925	0.948447	25.64	26.28	25.12	23.44	23.93	23.08	23.82	24.4	22.31	24.08	24.78	24.88	24.78	25.22	24.93	25.24	24	24.52	24.57	23.91	23.87
POTEF_HUMAN	A5A3E0	POTE ankyrin domain family member F	-0.0262412	0.910104	0.969405	25.58	26.36	25.15	23.44	23.66	23.33	24.09	24.56	22.59	24.08	24.83	24.73	24.35	25.06	24.84	25.21	23.9	24.8	24.54	24.19	23.9
PPIA_HUMAN	P62937	Peptidyl-prolyl cis-trans isomerase A	0.119804	0.604972	0.820386	23.34	22.66	23.93	23.24	23.8	23.19	22.64	23.92	22.32	23.42	23.15	23.28	23.22	23.14	22.91	24.34	22.87	23.72	23.21	23.41	23.61
PPIB_HUMAN	P23284	Peptidyl-prolyl cis-trans isomerase B	-0.548725	0.00999769	0.442966	20.42	19.94	21.48	21.57	21.44	21.3	20.18	21.8	17.27	18.88	21.39	21.45	21.63	21.8	21.13	18.74	19.54	21.63	21.11	20.63	20.75
PRB2_HUMAN	P02812	Basic salivary proline-rich protein 2	0.126102	0.585981	0.811862	27.26	27.68	19	27.46	26.26	26.82	24.35	19.48	24.9	27.46	27.04	20.6	25.79	27.34	25.38	25.9	23.21	20.8	27.26	23.33	25.25
PRB3_HUMAN	Q04118	Basic salivary proline-rich protein 3	0.22334	0.330469	0.640329	24.91	23.98	21.42	24.25	24.93	25.8	24.5	20.53	23.87	27.38	24.58	19.24	20.95	25.24	23.74	24.38	25.31	21.74	25.23	24.36	23.34
PRB4_HUMAN	P10163	Basic salivary proline-rich protein 4	-0.0267252	0.908452	0.969405	28.63	27.75	26.26	28.98	29.1	28.79	29.68	25.92	26.75	30.75	30.46	24.85	33.84	27.21	25.82	26.69	27.89	23.69	27.65	24.69	28.78
PRDX1_HUMAN	Q06830	Peroxiredoxin-1	-0.467869	0.0324473	0.446032	23.11	21.19	23.29	22.49	22.19	20.87	22.15	20.95	20.51	23.23	23.34	22.89	22.14	22.95	22.87	22.24	22.08	22.46	22.27	22.35	22.08
PRDX2_HUMAN	P32119	Peroxiredoxin-2	-0.260491	0.254099	0.604588	21.63	17.79	21.03	20.5	21.47	20.46	21.39	21.79	19.21	20.98	21.14	21.24	20.93	21.11	19.68	19.83	21.57	20.94	20.21	18.98	22.7
PRDX5_HUMAN	P30044	Peroxiredoxin-5, mitochondrial	-0.581237	0.00572042	0.442966	20.99	20.28	21.94	21.83	21.29	19.53	19.14	21.06	17.73	20.39	20.75	21.81	21.56	21.37	21.2	18.92	18.18	19.12	21.47	19.06	20.23
PRDX6_HUMAN	P30041	Peroxiredoxin-6	-0.498206	0.0215308	0.446032	21.56	20.22	22.53	22.02	21.66	20.63	20.92	22.28	20.6	22.21	21.82	22.17	22.02	21.75	21.5	20.63	20.68	22.07	21.48	20.74	21.8
PROF1_HUMAN	P07737	Profilin-1	-0.181541	0.430954	0.671122	23.16	22.16	22.98	20.91	22.33	20	20.1	22.83	19.05	20.26	20.35	23.58	23.08	22.76	22.18	21.74	19.33	22.56	23.04	21.01	21.55
PROL4_HUMAN	Q16378	Proline-rich protein 4	0.0881576	0.703951	0.870924	7.38	21.57	12.07	15.16	16.72	18.05	11.88	7.6	13.1	17.4	7.71	10.65	11.33	10.38	23.18	15.64	11.66	11.89	13.59	21.82	12.49
PRP1_HUMAN	P04280	Basic salivary proline-rich protein 1	0.448238	0.0415613	0.446032	26.03	25.86	14.79	22.28	19.31	20.66	18.85	17.85	23.8	22.5	23.36	17.15	20.06	27.1	25.31	27.41	26.48	19.25	23.69	24.87	19.89
PRPC_HUMAN	P02810	Salivary acidic proline-rich phosphoprotein 1/2	0.0207989	0.928696	0.971163	26.95	27.27	22.23	27.26	26.09	26.3	23.48	21.34	23.3	27	26.7	25.12	26.61	26.38	25.5	25.04	25.71	21.52	27.26	25.67	25.48
PRPE_HUMAN	P02811	Basic proline-rich peptide P-E	0.199221	0.386617	0.663191	27.76	28.24	16.49	28.13	24.19	25.01	25.45	19.42	22.89	27.31	26.48	15.09	26.08	29.63	26.24	27.34	21.45	22.75	28.33	25.78	25.1
PRTN3_HUMAN	Q9UQD8	Myeloblastin	-0.291103	0.200454	0.581434	20.33	14.41	19.75	19.29	18.06	15.15	19.26	16.97	14.46	20.72	17.46	22.01	22.29	20.81	21.48	20	16.95	18.01	22.97	20.01	18.85
PSA_HUMAN	P55786	Puromycin-sensitive aminopeptidase	-0.424262	0.0552584	0.446032	16.97	12.79	19.45	18.12	18.62	16.52	16.75	20.73	13.44	15.95	19.62	21.21	20.32	16.12	20.43	15.43	15.38	20.67	17.3	18.4	16.9
PSA3_HUMAN	P25788	Proteasome subunit alpha type-3	-0.200755	0.382894	0.663191	16.88	17.84	10.66	16.01	13.4	15.35	17.84	16.7	13.37	17.6	16.17	19.14	19.79	13.61	18.58	9.8	15.93	15.71	18.57	8.59	17.26
PSME2_HUMAN	Q9UL46	Proteasome activator complex subunit 2	-0.414963	0.0614119	0.446032	15.53	9.7	19.7	17.21	17.28	14.26	13.86	14.87	12.8	10.71	12.89	19.37	19.46	17.92	17.18	14.3	13.84	12.87	18.14	15.82	10.57
PYGL_HUMAN	P06737	Glycogen phosphorylase, liver form	0.00417156	0.985682	0.99168	18.68	16.83	17.45	16.84	16.27	18.36	14.91	17.38	15.48	14.62	16.73	18.52	19.3	17.53	14.31	16.42	16.31	19.25	19.6	13.54	14.54
PZP_HUMAN	P20742	Pregnancy zone protein	0.0926635	0.689527	0.870924	20.71	17.21	16.18	16.71	16.03	17.81	18.29	18.28	19.16	15.4	14.17	20.43	12.13	9.99	11.25	14.46	14.35	20.56	14.31	18.73	23.46
RA1L3_HUMAN	P0C7M2	Putative heterogeneous nuclear ribonucleoprotein A1-like 3	-0.294874	0.194417	0.570598	19.6	13.67	19.62	15.51	19.14	15.65	17.43	15.92	18.15	13.78	15.3	20.54	19.78	18.35	18.69	14.4	18.12	19.37	16.02	16.52	15.75
RAB10_HUMAN	P61026	Ras-related protein Rab-10	-0.371339	0.0974459	0.500985	22.84	18.33	22.59	21.69	20.7	21.63	21.41	22.53	16.3	22.19	21.26	21.73	18.35	22.14	21.64	21.17	21.04	22.22	21.71	20.78	21.63
RAB1A_HUMAN	P62820	Ras-related protein Rab-1A	-0.276451	0.225091	0.590381	19.38	14.78	21.64	20.4	20.18	17.93	17.11	18.03	8.23	17.76	16.02	21.78	18.57	15.81	17.54	18.13	19.29	17.07	20.95	18.67	16.83
RAB1B_HUMAN	Q9H0U4	Ras-related protein Rab-1B	-0.223757	0.329544	0.640329	16	14.26	20.21	18.85	16.96	16.51	16.07	17.44	11.28	16.78	16.35	20.3	19.1	14.47	13.31	17.72	16.87	15.04	18.56	17.32	16.5
RAB1C_HUMAN	Q92928	Putative Ras-related protein Rab-1C	-0.223757	0.329544	0.640329	16	14.26	20.21	18.85	16.96	16.51	16.07	17.44	11.28	16.78	16.35	20.3	19.1	14.47	13.31	17.72	16.87	15.04	18.56	17.32	16.5
RAB7A_HUMAN	P51149	Ras-related protein Rab-7a	-0.303834	0.180571	0.556294	18.91	17.2	19.34	18.15	17.95	16.13	16.94	20.91	17.47	20.24	17.35	21	20.51	17.86	19.09	14.75	17.81	16.5	17.3	16.72	16.32
RABP2_HUMAN	P29373	Cellular retinoic acid-binding protein 2	-0.543695	0.0108475	0.442966	20.14	16.91	20.79	21.6	19.67	21.48	18.76	19.54	17.46	20.47	22.32	20.5	20.03	20.12	23.32	19.37	19.18	21.64	18.97	19.26	22.04
RAC1_HUMAN	P63000	Ras-related C3 botulinum toxin substrate 1	-0.283735	0.212607	0.588268	22.02	18.86	22.03	20.55	18.07	18.71	12.24	21.1	14.06	15.04	16.33	21.72	21.53	21.64	21.8	17.87	17.66	20.07	17.93	17.46	19.13
RAC2_HUMAN	P15153	Ras-related C3 botulinum toxin substrate 2	0.0204043	0.930046	0.971163	21.4	19.2	21.47	17.25	18.67	17.28	13.25	21.09	15.82	16.01	14.04	21.74	21.14	18.72	19.05	19.2	16.77	18.66	19.03	18.16	18.84
RADI_HUMAN	P35241	Radixin	-0.0931452	0.687991	0.870924	21.45	18.9	20.86	19.2	21.8	19.79	20.16	22.85	18.33	19.7	19.92	20.79	21.37	20.91	20.76	18.84	20.68	21.52	21.91	18.31	19.08
RAN_HUMAN	Q9CWI7	GTP-binding nuclear protein Ran	-0.403954	0.0693554	0.468937	21.13	19.22	19.96	19.17	17.65	18.93	19.4	19.5	16.74	18.42	17.75	19.44	19.26	19.2	20.36	18.38	15.95	20.66	18.95	18.16	18.35
RINI_HUMAN	P13489	Ribonuclease inhibitor	-0.0628123	0.786788	0.913928	18.53	17.28	20.87	19.53	20.53	18.81	18.23	20.78	19.19	20.18	18.31	21.83	21.91	15.25	21.01	18.63	20.18	19.77	20.4	16.01	17.95
RL10_HUMAN	P27635	60S ribosomal protein L10	-0.266215	0.243434	0.604588	18.96	18.6	16.1	16.41	15.27	9.53	14.52	14.64	11.74	15.38	18.21	20.69	20.31	16.74	20.09	16.47	11.27	16.58	15.51	17.51	14.96
RL11_HUMAN	P62913	60S ribosomal protein L11	-0.310448	0.170792	0.546714	19.46	17.17	18.28	20.58	20.34	18.62	15.98	21.19	16.64	14.84	18.3	21.45	18.56	18.02	18.75	15.54	18.06	19.46	15.37	18.08	17.28
RL3_HUMAN	P39023	60S ribosomal protein L3	-0.272135	0.232712	0.601173	20.81	16.55	19.69	16.41	18.45	16.54	17.55	16.46	16.33	17.11	18.62	21.12	19.31	15.16	19.31	14.98	18.3	20.41	16.78	16.18	15.23
RL7_HUMAN	P18124	60S ribosomal protein L7	0.203804	0.375557	0.663191	17.79	19.3	17.74	15.63	16.1	16.93	17.29	18.56	18.3	16.17	17.02	19.34	20.47	17.36	14.87	17.48	17.38	19.41	17.44	15.23	16.01
RL7A_HUMAN	P62424	60S ribosomal protein L7a	-0.207532	0.366696	0.663191	17.54	16.74	20.18	17.26	18.13	17.81	9.75	16.87	15.27	14.48	14.62	21.69	21.62	17.23	16.16	14.01	15.28	19.51	13.91	16.86	18.6
RLA0_HUMAN	P05388	60S acidic ribosomal protein P0	-0.242154	0.290246	0.62522	18.74	16.53	20.56	19.05	19.53	16.99	18.87	21.22	17.34	18.23	17.35	21.3	21.23	17.98	17.87	17.28	17.04	21.17	18.61	19.32	18.52
RLA0L_HUMAN	Q8NHW5	60S acidic ribosomal protein P0-like	-0.242154	0.290246	0.62522	18.74	16.53	20.56	19.05	19.53	16.99	18.87	21.22	17.34	18.23	17.35	21.3	21.23	17.98	17.87	17.28	17.04	21.17	18.61	19.32	18.52
RLA2_HUMAN	P05387	60S acidic ribosomal protein P2	-0.397683	0.0742139	0.478241	22.55	20.14	22.84	22.4	19.34	18.36	19.3	22.38	19.95	20.62	22.02	21.64	21.67	20.89	21.7	17.23	19.06	22.7	21.89	18.72	17.9
ROA1_HUMAN	P09651	Heterogeneous nuclear ribonucleoprotein A1	-0.294874	0.194417	0.570598	19.6	13.67	19.62	15.51	19.14	15.65	17.43	15.92	18.15	13.78	15.3	20.54	19.78	18.35	18.69	14.4	18.12	19.37	16.02	16.52	15.75
ROA2_HUMAN	P22626	Heterogeneous nuclear ribonucleoproteins A2/B1	-0.0437157	0.850757	0.948447	16.94	18.29	17.65	16.34	15.7	16.45	14.28	15.8	17.43	17.62	19.05	18.44	19.85	15.38	15.72	16.57	12.02	17.11	19.06	17.83	19.57
RPTN_HUMAN	Q6XPR3	Repetin	-0.326838	0.148145	0.544294	15.55	13.13	16.87	12.11	8.15	8.97	12.48	10.59	14.08	13.33	10.55	20.1	20.23	11.68	15.83	10.61	9.86	14.11	13.67	11.23	15.88
RS15A_HUMAN	P62244	40S ribosomal protein S15a	-0.128867	0.577725	0.80406	21.4	13.01	21.47	19	21.32	16.26	13.72	20.82	18.04	11.7	14.83	16.7	21.42	16.18	20.97	14.34	16.23	20.43	18.75	14.6	16.36
RS18_HUMAN	P62269	40S ribosomal protein S18	-0.257627	0.259546	0.604588	21.15	19.74	21.14	19.96	18.47	18.17	21.79	21.62	20.05	18.9	20.97	22.41	21.95	21.15	21.79	20.01	20.96	22.1	20.97	19.11	18.46
RS19_HUMAN	P39019	40S ribosomal protein S19	0.322268	0.154236	0.546714	18.46	16.23	18.02	18.51	20.01	17.76	13.36	18.64	18.15	17.54	17.8	16.82	17.55	18.68	15.28	18.23	18.58	17.09	18.09	16.97	15.18
RS2_HUMAN	P15880	40S ribosomal protein S2	-0.316751	0.161818	0.546714	20.72	16.58	18.78	20.67	20.51	16.93	19.47	20.37	15.87	18.47	19.06	21.83	21.47	17.04	14.86	16.46	15.55	17.31	13.53	16.78	16.05
RS3_HUMAN	P23396	40S ribosomal protein S3	0.0910192	0.694779	0.870924	16.75	18.27	19.79	14.67	19.23	15.72	16.44	17.77	18.79	16.73	12.47	21.17	19.38	17.77	19.08	17.78	18.97	18.52	16.49	18.03	16.32
RSSA_HUMAN	Q86VC0	40S ribosomal protein SA	-0.0450105	0.846386	0.947647	20.11	18.13	18.41	20.86	19.6	17.81	18.17	20.51	19.76	19.08	19.33	21.2	20.43	18.24	18.98	18.03	19.7	19.79	19.08	18.05	18.66
S100P_HUMAN	P25815	Protein S100-P	0.238545	0.297717	0.62522	20.99	12.13	12.74	11.31	19.8	12.42	13.34	22.57	18.88	14.38	12.87	21.65	20.45	18.8	16.93	16.21	13.59	21.18	15.25	17.58	11.15
S10A2_HUMAN	P29034	Protein S100-A2	-0.0806424	0.728225	0.885293	22.69	20.92	21.85	20.64	21.57	20.94	20.44	22.26	21.71	19.15	18.3	22.25	21.89	22.38	21.77	20.92	20.66	21.69	20.96	19.43	21.54
S10A6_HUMAN	P06703	Protein S100-A6	0.371788	0.0970092	0.500985	17.28	15.87	13.98	14.23	18.05	11.25	11.93	20.05	15.85	17.86	12.95	16.95	22.58	19.85	16.1	17.28	15.1	17.46	19.37	18.64	17.26
S10A7_HUMAN	P31151	Protein S100-A7	-0.193682	0.400224	0.663191	24.19	19.79	21.05	17.05	22.39	21.22	18.6	18.08	19.34	16.29	16.59	16.3	16.98	22.42	20.51	14.32	15.76	21.07	21.43	16.49	18.34
S10A8_HUMAN	P05109	Protein S100-A8	-0.428546	0.0525868	0.446032	24.45	21.08	24.07	20.43	23.43	21.43	22.16	21.71	18.44	23.02	23	21.93	23.43	25.48	24.56	19.66	19.82	22.67	23.66	23.68	22.3
S10A9_HUMAN	P06702	Protein S100-A9	-0.140498	0.543557	0.770297	25	23.24	24.32	21.25	24.13	20.13	21.87	22.34	21.87	23.15	22.26	22.79	24.51	26.51	25.23	22.42	20.51	23.93	23.81	24.92	21.89
S10AA_HUMAN	P60903	Protein S100-A10	-0.411369	0.0639251	0.452955	23.55	20.29	23.94	23.2	23.14	21.94	21.94	23.35	21.88	19.56	22.19	23.75	23.34	22.12	23.16	18.72	22.94	23.26	22.54	22.92	21.65
S10AB_HUMAN	P31949	Protein S100-A11	0.201247	0.381706	0.663191	22.71	22.99	22.53	21.27	24.37	19.82	17.69	22.37	20.69	19.59	19.79	24.24	23.2	20.23	22.46	22.92	22.02	21.76	22.15	20.13	18.02
S10AC_HUMAN	P80511	Protein S100-A12	0.304889	0.178986	0.554857	24.15	20.1	13.57	12.58	16.9	17.87	19.57	17.77	15.81	20.17	15.2	18.37	15.09	22.78	21.59	18.8	21.45	21.91	22.52	22.09	20.49
S10AE_HUMAN	Q9HCY8	Protein S100-A14	-0.252772	0.268946	0.604588	23.21	23.47	23.4	23.13	22.46	21.89	22.38	22.31	18.8	22.94	22.74	23.03	22.47	23.12	23.1	22.45	23.17	22.97	22.41	23.71	21.51
S10AG_HUMAN	Q96FQ6	Protein S100-A16	-0.514254	0.0170794	0.442966	22.66	20.4	22.45	22.58	21.76	20.58	22.23	22.7	19.41	20.23	22.16	22.74	22.31	21.95	22.18	20.08	21.46	22.49	21.58	21.94	20.86
S1A7A_HUMAN	Q86SG5	Protein S100-A7A	-0.0479294	0.83655	0.945168	24.17	21.84	21.34	13.72	22.99	22.27	16.78	15.22	21.72	13.92	17.5	15.38	16.52	22.5	17.77	14.38	12.58	22.82	21.43	14.49	16.12
SAA_HUMAN	Q6FG67	Serum amyloid A protein	0.0767684	0.740838	0.894248	19.95	18.13	9.22	9.68	1.71	7.6	2.45	8	15.93	5.35	7.39	5.51	12.85	22.76	18.1	7.17	8.52	15.03	19.35	10.77	10.81
SBSN_HUMAN	Q6UWP8	Suprabasin	0.0397054	0.864319	0.95537	16.93	13.91	16.27	18.87	17.26	17.7	15.54	18.25	18.5	13.19	16.68	16.44	19.71	13.89	18.1	16.82	15.3	21.3	20.61	13.8	21.16
SCEL_HUMAN	O95171	Sciellin	-0.339869	0.13171	0.52061	21.8	18.21	20.56	20.19	18.77	16.66	18.21	19.36	16.28	19.22	17.34	21.5	21.2	19.89	20.7	17.95	18.84	19.14	18.68	19.26	17.18
SMR3B_HUMAN	P02814	Submaxillary gland androgen-regulated protein 3B	-0.189205	0.411412	0.663191	27.18	28.06	25.01	27.54	26.26	26.57	26.39	25.13	25.39	28.12	28.47	25.29	26	26	28.01	24.38	25.52	24.66	26.68	27.95	26.61
SNAA_HUMAN	P54920	Alpha-soluble NSF attachment protein	0.0916508	0.69276	0.870924	17.78	12.22	16.73	15.02	18.3	13.7	15.61	15.63	14.05	17.29	12.57	20.79	20.56	14.78	14.08	17.32	17.47	16.05	18.5	14.5	15.28
SPB13_HUMAN	Q9UIV8	Serpin B13	-0.364663	0.104097	0.500985	20.09	17.75	20.96	19.7	19.96	18.51	17.74	20.5	19.78	18.72	20.62	21.5	21.19	21.09	21.16	18.1	17.93	20.95	20.61	20.82	19.31
SPB3_HUMAN	Q8IXI3	Serpin B3	-0.425726	0.0543339	0.446032	21.08	18.67	21.76	21.84	21	20.23	19.71	21.82	20.51	21.6	22.39	21.24	20.99	22.41	22.11	18.5	18.97	22.63	22.97	21.65	21.21
SPB4_HUMAN	P48594	Serpin B4	-0.532703	0.0129102	0.442966	20.66	18.68	21.29	21.67	20.28	20.07	20.02	21.12	20.21	21.05	22.17	20.82	20.44	22.04	21.91	17.31	17.89	21.96	22.63	21.34	20.67
SPB5_HUMAN	P36952	Serpin B5	-0.356048	0.113163	0.501152	22.01	19.16	22.09	22.38	21.43	19.85	19.77	22.96	19.98	19.74	21.36	21.33	21.19	22.13	22.28	20.37	20.22	22.48	21.43	20.61	21.85
SPLC2_HUMAN	Q96DR5	Short palate, lung and nasal epithelium carcinoma-associated protein 2	-0.0895531	0.699473	0.870924	23.38	24.68	23	23.24	26.19	26.95	24.15	24.46	23.85	23.52	25.85	25.09	25.08	26.42	25.73	24.28	23.43	25.03	25.74	24.96	23.78
SPRR3_HUMAN	Q9UBC9	Small proline-rich protein 3	-0.383482	0.0861541	0.499732	25.38	23.95	26.04	25.68	26.06	26.46	23.48	25.65	25.53	24.52	25.07	26.52	25.79	25.24	25.39	23.43	23.53	25.94	25.56	24.97	25.24
STAT_HUMAN	P02808	Statherin	0.110307	0.634079	0.839111	23.49	25.46	22.49	25.64	25.31	21.59	22.77	20.32	23.34	25.65	23.55	22.49	23.89	24.1	26.19	24.09	24.51	22.24	25.65	26.08	22.84
STOM_HUMAN	P27105	Erythrocyte band 7 integral membrane protein	0.269132	0.238111	0.604588	20.83	20.06	14.64	9.01	6.39	12.05	9.87	18.22	10.05	15.35	13.6	18.64	13.59	11.96	13.24	17.36	14.56	12.48	12.98	16.2	9.21
TAGL2_HUMAN	P37802	Transgelin-2	-0.142078	0.538987	0.770297	20.31	18.57	21.76	20.47	20.13	18.91	18.09	20.19	19.61	17.56	19.04	21.38	21.46	19.75	19.7	20.22	19.2	21.72	21.25	18.24	19.82
TALDO_HUMAN	P37837	Transaldolase	-0.214556	0.350328	0.663191	21.74	20.19	21.53	17.9	19.45	19.39	19.61	21.17	17.28	19.44	19.77	20.97	19.91	22.34	21.84	19.8	19.94	21.79	21.74	18.27	19.05
TBA1A_HUMAN	Q71U36	Tubulin alpha-1A chain	-0.289914	0.202383	0.583573	22.56	20.97	22.61	21.9	22.45	20.75	21.48	22.36	20.58	22.12	22.57	22.61	22.49	22.11	22.22	21.47	21.99	22.62	21.59	22.16	21.67
TBA1B_HUMAN	P68363	Tubulin alpha-1B chain	-0.346854	0.123454	0.506579	22.56	21.05	22.66	21.92	22.22	20.86	21.55	22.37	20.63	22.06	22.55	22.63	22.44	22.04	22.08	21.31	21.93	22.55	21.47	22.16	21.8
TBA1C_HUMAN	Q9BQE3	Tubulin alpha-1C chain	-0.350992	0.118743	0.506579	22.47	21.07	22.56	21.9	22.16	20.9	21.54	22.25	20.71	22.01	22.45	22.52	22.35	21.97	22.03	21.33	21.88	22.45	21.47	22.07	21.74
TBA3C_HUMAN	Q13748	Tubulin alpha-3C/D chain	-0.356768	0.112385	0.501152	22.65	21.31	22.53	21.96	22.36	20.44	21.52	22.32	20.4	22.08	22.55	22.76	22.54	22.21	22.32	21.02	21.95	22.64	21.51	22.15	22.07
TBA3E_HUMAN	Q6PEY2	Tubulin alpha-3E chain	-0.211293	0.357879	0.663191	23.28	22.19	23.29	22.83	23.36	22.41	22.99	23.25	21.23	23.28	23.19	23.23	22.9	22.99	22.59	23.18	22.86	23.18	22.2	23.18	23.04
TBA4A_HUMAN	P68366	Tubulin alpha-4A chain	-0.361862	0.106985	0.500985	22.2	20.77	22.22	21.78	21.83	20.16	21.43	22.01	19.66	21.34	22.14	22.53	22.24	21.52	21.74	20.97	21.63	22.32	21.14	21.77	21.65
TBA4B_HUMAN	Q9H853	Putative tubulin-like protein alpha-4B	-0.476812	0.0288559	0.446032	23.22	22.09	23.4	22.72	21.96	22.25	22.85	23.05	20.52	22.93	22.9	23.08	22.49	22.62	22.14	21.73	22.41	22.68	21.44	23	23.26
TBA8_HUMAN	Q9NY65	Tubulin alpha-8 chain	-0.459538	0.0361007	0.446032	22.69	21.89	22.63	22.3	22.25	21.08	21.1	22.33	20.26	22.24	22.57	22.73	22.51	22.21	22.07	20.3	21.47	22.48	21.32	22.16	22.43
TBB1_HUMAN	Q9H4B7	Tubulin beta-1 chain	-0.396616	0.0750653	0.478241	19.5	18.18	20.92	20.17	19.75	17.43	16.97	19.51	17.36	17.85	20.71	20.54	22.37	18.34	20.23	16.34	18.09	21.29	17.05	18.94	18.9
TBB2A_HUMAN	Q13885	Tubulin beta-2A chain	-0.391467	0.079277	0.485449	21.34	20.21	22.07	21.12	21.29	19.15	20.22	20.79	18.21	20.82	21.28	21.83	22.24	20.4	21.02	19.67	20.43	21.42	19.79	21.43	20.65
TBB2B_HUMAN	Q9BVA1	Tubulin beta-2B chain	-0.391467	0.079277	0.485449	21.34	20.21	22.07	21.12	21.29	19.15	20.22	20.79	18.21	20.82	21.28	21.83	22.24	20.4	21.02	19.67	20.43	21.42	19.79	21.43	20.65
TBB2C_HUMAN	P68371	Tubulin beta-2C chain	-0.421954	0.0567397	0.446032	21.47	20.27	22.08	21.55	21.59	19.55	20.52	21.4	18.52	20.81	21.29	21.89	22.06	21.04	21.26	20.15	20.42	21.87	20.15	21.24	20.37
TBB3_HUMAN	Q13509	Tubulin beta-3 chain	-0.429343	0.0521015	0.446032	21.66	20.37	22.1	21.65	22.04	19.2	20.36	20.97	17.81	20.11	21.57	21.72	22.29	20.92	21.15	19.49	20.47	21.37	20.25	20.92	19.86
TBB4_HUMAN	P04350	Tubulin beta-4 chain	-0.418787	0.0588216	0.446032	21.72	20.57	22.16	22.05	22.37	19.87	20.74	21.86	18.68	20.48	21.69	21.92	22.17	21.62	21.49	20.2	20.48	22.14	20.48	21.16	19.85
TBB4Q_HUMAN	Q99867	Putative tubulin beta-4q chain	-0.377396	0.0916847	0.499732	20.01	18.9	21.2	20.37	20.28	18.14	17.97	19.92	17.73	18.41	20.8	20.84	22.27	19.05	20.41	17.72	18.92	21.46	17.91	19.62	19.4
TBB5_HUMAN	P07437	Tubulin beta chain	-0.414772	0.0615437	0.446032	21.32	19.86	21.88	20.53	21.61	19.57	20.41	21.09	18.3	20.06	20.59	21.87	22.22	20.65	21	19.56	20.06	21.47	20.03	20.79	20.72
TBB6_HUMAN	Q9BUF5	Tubulin beta-6 chain	-0.333054	0.140134	0.537299	21.4	20.56	21.79	22.02	22.08	19.28	19.5	21.38	18.46	19.87	21.92	21.23	22.63	21.13	20.88	19.41	19.93	21.91	19.29	20.97	19.3
TBB8_HUMAN	Q3ZCM7	Tubulin beta-8 chain	-0.356987	0.112148	0.501152	20.57	19.54	21.58	20.76	20.78	18.93	18.82	20.51	18.61	19.1	21.21	21.18	22.33	19.8	20.82	18.91	19.7	21.75	18.56	20.26	20.09
TBB8B_HUMAN	A6NNZ2	Tubulin beta-8 chain B	-0.377981	0.0911418	0.499732	20.27	19.1	21.44	20.68	20.46	18.52	18.19	20.31	18.49	18.79	21.21	21.01	22.42	19.38	20.75	18.04	19.19	21.67	18	19.85	19.83
TCO1_HUMAN	P20061	Transcobalamin-1	0.119657	0.605418	0.820386	21.06	21.32	21.79	22.11	22.12	22.12	19.91	22.44	22.68	19.65	21.05	21.36	21.48	22.4	22.09	21.29	22.52	21.91	22.2	21.65	21.93
TCPB_HUMAN	P78371	T-complex protein 1 subunit beta	-0.604769	0.00368106	0.442966	18.88	15.17	17.58	17.93	14.82	16.76	16.31	16.07	13.69	14.79	16.72	18.68	17.1	17.74	17.55	14.2	16.64	16.57	17.28	16.51	16.34
TCPQ_HUMAN	P50990	T-complex protein 1 subunit theta	0.0817903	0.7245	0.883505	20.68	16.25	18.45	16.48	17.08	17.46	18.22	19.35	15.28	18.86	10.43	21.06	18.44	18.34	13.76	21.19	12.42	19.44	18.19	18.2	18.18
TCTP_HUMAN	P13693	Translationally-controlled tumor protein	-0.209111	0.362979	0.663191	19.62	18.19	20.73	19.74	19.36	17.28	16.91	19.91	19.14	17.25	18.8	20.34	20.7	20.29	19.21	18.77	16.75	21.05	20.58	17.83	17.9
TERA_HUMAN	P55072	Transitional endoplasmic reticulum ATPase	-0.357585	0.111506	0.501152	19.7	16.65	19.19	18.15	18.43	15.34	16.54	18.39	16.99	16.17	16.32	20.56	19.4	17.81	17.68	15.97	15.7	19.33	17.11	14.68	17.42
TGM1_HUMAN	P22735	Protein-glutamine gamma-glutamyltransferase K	-0.143673	0.534394	0.767913	19.68	16.76	20.88	17.82	18.95	17.93	16.77	20.21	15.13	17.63	16.55	21.61	20.83	16.6	19.96	17.62	18.4	19.5	18.37	19.6	14.92
TGM3_HUMAN	Q08188	Protein-glutamine gamma-glutamyltransferase E	0.0550938	0.812508	0.928581	23.8	21.72	24.29	23.59	23.83	22.59	21.92	24.06	24.29	22.42	23.09	23.6	23.52	23.33	23.36	23.36	23.4	24.45	23.89	23.02	23.84
THIO_HUMAN	P10599	Thioredoxin	-0.649856	0.00142935	0.33523	23.87	21.86	23.81	24.39	22.12	23.38	23.67	23.03	22.7	21.76	23.2	24.72	24.19	23.67	23.96	21.8	22.29	22.64	24.29	22.69	24.69
TIMP1_HUMAN	P01033	Metalloproteinase inhibitor 1	-0.228526	0.319066	0.640329	20.53	20.23	20.34	20.02	17.09	19.9	17.21	19.57	20.31	15.14	14.64	18.3	19	21.31	21.61	19.45	13.75	18.62	18.75	17.12	19.47
TKT_HUMAN	P29401	Transketolase	-0.0880668	0.704243	0.870924	22.15	21.22	22.13	20.37	21.47	19.91	21.67	22.34	20.14	21.4	21.2	21.87	20.93	21.37	21.61	21.69	19.52	22.25	22.27	21.66	20.43
TM11B_HUMAN	Q86T26	Transmembrane protease serine 11B	-0.237252	0.300421	0.62522	18.86	14.93	22.29	21.9	20.23	16.43	18.46	17.88	16.28	20.19	18.92	23.02	20.08	18.7	21.29	19.3	20.66	26.74	19.31	20.08	14.87
TM11D_HUMAN	O60235	Transmembrane protease serine 11D	0.207136	0.367632	0.663191	14.87	17.25	15.26	16.51	20.75	16.72	16.65	20.86	19.12	13	15.34	18.53	19.6	14.62	14.91	14.94	14.12	21.3	20.13	16.35	13.8
TMSL1_HUMAN	Q08EQ4	Putative thymosin beta-4-like protein 1	0.100412	0.664966	0.857476	22.79	14.37	21.74	16.05	17.23	21.71	17.53	17.39	14.76	17.14	14.12	9.48	13.87	25.52	22.09	23.34	20.28	20.91	22.89	19.32	19.86
TMSL3_HUMAN	A8MW06	Thymosin beta-4-like protein 3	0.100412	0.664966	0.857476	22.79	14.37	21.74	16.05	17.23	21.71	17.53	17.39	14.76	17.14	14.12	9.48	13.87	25.52	22.09	23.34	20.28	20.91	22.89	19.32	19.86
TMSL6_HUMAN	A9Z1Y9	Putative thymosin beta-4-like protein 6	0.100412	0.664966	0.857476	22.79	14.37	21.74	16.05	17.23	21.71	17.53	17.39	14.76	17.14	14.12	9.48	13.87	25.52	22.09	23.34	20.28	20.91	22.89	19.32	19.86
TPIS_HUMAN	P60174	Triosephosphate isomerase	-0.459891	0.0359396	0.446032	22.23	21.08	22.89	22.15	22.28	21.83	21.96	22.49	21.94	22.12	22.78	22.46	22.16	22.11	22.1	21.38	20.81	23.08	22.6	21.73	22.44
TPM1_HUMAN	Q96IK2	Tropomyosin alpha-1 chain	-0.313759	0.166036	0.546714	23.08	22.42	22.44	22.6	21.21	25.18	23.35	17.39	17.12	20.66	24.94	19.51	20.91	21.01	22.17	23.11	20.01	18.18	21.76	20.93	21.1
TPM2_HUMAN	P07951	Tropomyosin beta chain	-0.0747339	0.747488	0.897709	21.03	20.11	19.4	21.75	20.26	24.08	19.67	18.56	14.79	17.32	24.13	16.72	17.82	19.4	18.17	22.71	20.53	19.45	16.51	19.1	23.5
TPM3_HUMAN	P06753	Tropomyosin alpha-3 chain	-0.366896	0.101837	0.500985	17.76	19.12	20.97	19.3	17.31	21.02	18.39	15.4	17.35	19.17	20.88	19.93	20.34	19.54	20.82	19.79	20.31	18.22	20.47	17.71	18.21
TPM4_HUMAN	Q9UCS3	Tropomyosin alpha-4 chain	-0.190865	0.407243	0.663191	17.59	18.4	19.44	19.45	17.52	21.19	17.17	16.5	15.91	17.46	21.2	18.17	18.6	18.87	18.69	20.21	20.56	18.97	17.58	17.26	20.23
TRFE_HUMAN	P02787	Serotransferrin	0.0153612	0.947309	0.976851	21.71	22.14	21.66	22.14	20.6	21.73	21.12	22.43	22.08	19.42	18.59	23.39	22.3	19.95	21.89	21.08	21.83	23.02	21.51	21.13	24.39
TRFL_HUMAN	Q8TCD2	Lactotransferrin	0.0127329	0.956315	0.977373	23.46	23.18	22.89	21.6	24.04	23.3	23.65	23.8	23.25	22.55	19.83	23.94	23.93	23.69	24.6	22.48	22.02	23.93	24.22	22.66	22.44
TRI29_HUMAN	Q14134	Tripartite motif-containing protein 29	-0.384325	0.0854076	0.499732	21.38	20.02	22.02	20.67	21.06	18.63	19.06	20.18	17.05	18.41	20.4	22.23	21.96	22.77	20	18.98	20.86	19.68	19.69	19.33	17.22
TTHY_HUMAN	P02766	Transthyretin	0.4516	0.0398734	0.446032	16.6	22.4	15.21	13.54	17.57	21.35	14.6	19.41	16.29	15.68	14.24	17.2	10.72	14.45	14.78	22.24	15.51	21.61	21.22	19.77	23.17
TYB4_HUMAN	P62328	Thymosin beta-4	0.100412	0.664966	0.857476	22.79	14.37	21.74	16.05	17.23	21.71	17.53	17.39	14.76	17.14	14.12	9.48	13.87	25.52	22.09	23.34	20.28	20.91	22.89	19.32	19.86
TYPH_HUMAN	P19971	Thymidine phosphorylase	0.44329	0.0441452	0.446032	13.21	11.95	3.65	11.91	13.7	6.2	11.95	14.99	13.49	10.32	6.87	14.88	17.02	11.01	13.54	12.62	16.44	8.4	16.31	13.37	9.58
UBA1_HUMAN	P22314	Ubiquitin-like modifier-activating enzyme 1	0.0066931	0.977029	0.988398	18.45	10.83	18.44	14.13	20.05	15.88	14.31	18.95	16.93	14.17	14.37	20.53	20.15	14.86	15.68	15.77	14.35	19.87	15.6	17.9	16.1
UBIQ_HUMAN	Q91887	Ubiquitin	0.114518	0.621106	0.832618	21.35	19	20.98	17.86	19.45	21.86	18.78	20.78	18.78	17.34	18.45	21.53	21.12	20.46	20.53	21.33	21.22	20.05	20.31	20.28	19.54
VAT1_HUMAN	Q99536	Synaptic vesicle membrane protein VAT-1 homolog	-0.448162	0.0416001	0.446032	17.97	12.55	21.45	17.65	13.96	16.42	19.51	17.3	14.63	12.91	13.22	21.55	16.24	21.93	20.52	18.51	15.17	15.84	20.69	19.22	13.58
VATA_HUMAN	P38606	V-type proton ATPase catalytic subunit A	-0.183272	0.426498	0.66944	19.21	11.2	18.3	13.28	18.59	12.45	16.05	14.78	16.09	13.17	14.36	20.55	14.7	15.37	13.03	16.24	13.96	12.46	13.87	15.63	16.56
VDAC1_HUMAN	P21796	Voltage-dependent anion-selective channel protein 1	-0.0106706	0.963386	0.981189	21.22	16.24	19.59	20.3	21.62	17.99	17.37	21.59	18.46	17.91	16.69	21.39	20.87	16.76	20.42	16.74	20.03	20.92	19.48	19.46	17.51
VDAC2_HUMAN	P45880	Voltage-dependent anion-selective channel protein 2	-0.436171	0.0480795	0.446032	21.85	19.08	21.13	21.42	21.53	20.46	19.08	21.9	17.94	20.74	21.4	22.41	21.2	20.01	21.51	16.32	20.27	20.19	19.86	21.79	19.41
VIME_HUMAN	Q96ML2	Vimentin	-0.155355	0.501308	0.740027	21.77	18.68	20.2	16.56	17.41	16.55	17.44	20.07	16.09	17.22	15.6	19.28	19.17	21.25	21.54	17.82	17.68	19.52	20.66	16.15	16.55
VTDB_HUMAN	P02774	Vitamin D-binding protein	0.384159	0.0855536	0.499732	17.38	21.89	12.89	17.9	18.3	20.87	17.55	20.59	20.6	21.91	14.17	21.01	16.53	18	20.47	22.38	18.74	19.62	16.43	18.7	22.92
WDR1_HUMAN	O75083	WD repeat-containing protein 1	-0.143225	0.535681	0.767913	18.99	18.88	19.88	18.48	19.77	17.86	18.83	21.31	16.4	17.81	17.7	20.75	19.19	18.12	20.42	18.76	18.99	21.03	19.38	18.22	19.04
YI016_HUMAN	A6NKZ8	Putative tubulin beta chain-like protein ENSP00000290377	-0.377981	0.0911418	0.499732	20.27	19.1	21.44	20.68	20.46	18.52	18.19	20.31	18.49	18.79	21.21	21.01	22.42	19.38	20.75	18.04	19.19	21.67	18	19.85	19.83
ZA2G_HUMAN	P25311	Zinc-alpha-2-glycoprotein	0.0406151	0.86124	0.95537	25.2	25.18	24.74	25.86	25.27	25.44	25.36	24.74	24.59	25.9	25.58	24.42	24.52	25.15	24.88	25.64	25.46	24.88	25.13	24.46	24.97
ZG16B_HUMAN	Q96DA0	Zymogen granule protein 16 homolog B	-0.0842915	0.716405	0.879547	26.5	25.69	26.54	25.95	26.44	26.11	24.65	26.77	25.2	24.19	25.22	26.57	27.32	26.78	27.2	26.38	25.86	26.1	26.67	25.52	25.63
ZN185_HUMAN	O15231	Zinc finger protein 185	0.122113	0.597981	0.820386	18.69	22.26	20.26	15.43	18.71	14.43	16.55	16.71	16.71	15.52	13.21	20.75	20.95	14.46	19.66	18.31	18.01	16.39	17.7	18.28	15.86
