# Supplementary material
Source: publisher figshare collection journal article supplement (https://plos.figshare.com/articles/dataset/_/992947)
Supplement: Supplementary file 1 [file 1 › Table_S4.pdf]

| Table S4. Salivary proteins from Table 2 that overlap with proteins that are modulated in brain tissues by drugs of abuse (adapted from Wang et al. 2011) <sup>1</sup> |                                                              |             |                               |                                                                                                         |
|------------------------------------------------------------------------------------------------------------------------------------------------------------------------|--------------------------------------------------------------|-------------|-------------------------------|---------------------------------------------------------------------------------------------------------|
| UniProt                                                                                                                                                                | Protein name                                                 | Gene symbol | Drugs                         | Brain tissues (ref)                                                                                     |
| Q13509                                                                                                                                                                 | Tubulin, beta 3 class III                                    | TUBB3       | Marijuana/<br>Morphine        | Rat hippocampus <sup>2</sup> /rat primary striatal neuronal cell cultures <sup>3</sup>                  |
| O75083                                                                                                                                                                 | WD repeat domain 1                                           | WDR1        | Morphine                      | Rat cerebral cortex, hippocampus, and striatum <sup>4</sup>                                             |
| Q96ML2                                                                                                                                                                 | Vimentin                                                     | VIM         | Morphine                      | African Green Monkey CSF <sup>5</sup>                                                                   |
| P15104                                                                                                                                                                 | Glutamate-ammonia ligase                                     | GLUL        | MA/Cocaine/<br>Morphine       | Rat amygdala <sup>6</sup> /rhesus monkey nucleus accumbens <sup>7</sup> /mouse hippocampus <sup>8</sup> |
| P26641                                                                                                                                                                 | Eukaryotic translation elongation factor 1 gamma             | EEF1G       | MA/Cocaine                    | Rat cortex <sup>9</sup> /human astrocyte cultures <sup>10</sup>                                         |
| P02042                                                                                                                                                                 | Hemoglobin, delta                                            | HBD         | Morphine                      | African Green Monkey CSF <sup>5</sup>                                                                   |
| P29401                                                                                                                                                                 | Transketolase                                                | TKT         | Cocaine/Morphine/<br>Nicotine | Rat nucleus accumbens <sup>11</sup> /rat brains <sup>12</sup> /rat brains <sup>13</sup>                 |
| P08238                                                                                                                                                                 | Heat shock protein 90kDa alpha (cytosolic), class B member 1 | HSP90AB1    | MA/Morphine                   | Rat cortex <sup>9</sup> /rat primary striatal neuronal cell cultures <sup>3</sup>                       |
| Q549N7                                                                                                                                                                 | Hemoglobin subunit beta                                      | HBB         | Morphine                      | African Green Monkey CSF <sup>5</sup>                                                                   |
| Abbreviations: MA = methamphetamine/amphetamine, CSF = cerebrospinal fluid                                                                                             |                                                              |             |                               |                                                                                                         |

1. Wang, J., Yuan, W. & Li, M.D. Genes and pathways co-associated with the exposure to multiple drugs of abuse, including alcohol, amphetamine/methamphetamine, cocaine, marijuana, morphine, and/or nicotine: a review of proteomics analyses. *Molecular neurobiology* **44**, 269-286 (2011).
2. Quinn, H.R., et al. Adolescent rats find repeated Delta(9)-THC less aversive than adult rats but display greater residual cognitive deficits and changes in hippocampal protein expression following exposure. *Neuropsychopharmacology : official publication of the American College of Neuropsychopharmacology* **33**, 1113-1126 (2008).
3. Bodzon-Kulakowska, A., et al. Proteomic analysis of striatal neuronal cell cultures after morphine administration. *Journal of separation science* **32**, 1200-1210 (2009).
4. Bierzynska-Krzysik, A., et al. Proteomic analysis of rat cerebral cortex, hippocampus and striatum after exposure to morphine. *International journal of molecular medicine* **18**, 775-784 (2006).
5. Brown, J.N., et al. Morphine produces immunosuppressive effects in nonhuman primates at the proteomic and cellular levels. *Molecular & cellular proteomics : MCP* **11**, 605-618 (2012).
6. Iwazaki, T., McGregor, I.S. & Matsumoto, I. Protein expression profile in the amygdala of rats with methamphetamine-induced behavioral sensitization. *Neuroscience letters* **435**, 113-119 (2008).

7. Tannu, N.S., Howell, L.L. & Hemby, S.E. Integrative proteomic analysis of the nucleus accumbens in rhesus monkeys following cocaine self-administration. *Molecular psychiatry* **15**, 185-203 (2010).
8. Moron, J.A., et al. Morphine administration alters the profile of hippocampal postsynaptic density-associated proteins: a proteomics study focusing on endocytic proteins. *Molecular & cellular proteomics : MCP* **6**, 29-42 (2007).
9. Kobeissy, F.H., et al. Psychoproteomic analysis of rat cortex following acute methamphetamine exposure. *Journal of proteome research* **7**, 1971-1983 (2008).
10. Reynolds, J.L., et al. Proteomic analysis of the effects of cocaine on the enhancement of HIV-1 replication in normal human astrocytes (NHA). *Brain research* **1123**, 226-236 (2006).
11. del Castillo, C., et al. Proteomic analysis of the nucleus accumbens of rats with different vulnerability to cocaine addiction. *Neuropharmacology* **57**, 41-48 (2009).
12. Kim, S.Y., et al. Proteomic analysis of phosphotyrosyl proteins in morphine-dependent rat brains. *Brain research. Molecular brain research* **133**, 58-70 (2005).
13. Hwang, Y.Y. & Li, M.D. Proteins differentially expressed in response to nicotine in five rat brain regions: identification using a 2-DE/MS-based proteomics approach. *Proteomics* **6**, 3138-3153 (2006).
