# Supplementary material
Source: publisher figshare collection journal article supplement (https://plos.figshare.com/articles/dataset/_/992947)
Supplement: Supplementary file 1 [file 1 › Table_S5.pdf]

Table S5. Overlap of salivary proteins from Table 2 and brain proteins identified in HIV-1 infected subjects by proteomic analysis.

| UniProt | Protein name                                | Gene symbol | Brain tissue                           | Study description (ref)                                                              |
|---------|---------------------------------------------|-------------|----------------------------------------|--------------------------------------------------------------------------------------|
| P16152  | Carbonyl reductase 1                        | CBR1        | Frontal cortex (Human)                 | Increased 2 fold in HAD vs. HIV+ without dementia (Zhou 2010)                        |
| P08107  | Heat shock 70kDa protein 1A                 | HSPA1A      | Frontal neocortex synaptosomes (Human) | Increased 2.00 fold in HIV+ synaptosomes with high immunoproteosomes (Gelman 2010)   |
| P21333  | Filamin A, alpha                            | FLNA        | CSF (Human)                            | Identified in CSF of HIV-infected subjects (Angel 2012)                              |
| Q96ML2  | Vimentin                                    | VIM         | CSF (Human)                            | High confidence identification in CSF of HIV-infected subjects (Rozek 2007)          |
| P15104  | Glutamate-ammonia ligase                    | GLUL        | Frontal cortex (Human)                 | Increased 1.85 fold in HAD vs. HIV+ without dementia (Zhou 2010)                     |
| P02511  | Crystallin, alpha B                         | CRYAB       | Frontal neocortex synaptosomes (Human) | Decreased - 2.11 fold in HIV+ synaptosomes with high immunoproteosomes (Gelman 2010) |
| P22314  | Ubiquitin-like modifier activating enzyme 1 | UBA1        | Frontal neocortex synaptosomes (Human) | Increased 2.02 fold in HIV+ synaptosomes with high immunoproteosomes (Gelman 2010)   |
| Q549N7  | Hemoglobin subunit beta                     | HBB         | CSF (Human)                            | Identified in CSF of HIV-infected subjects (Angel 2012)                              |
|         | ? beta tubulin                              |             |                                        | (Gelman 2010)                                                                        |
|         | ? alpha tubulin                             |             |                                        | (Gelman 2010)                                                                        |
|         |                                             |             |                                        |                                                                                      |
|         |                                             |             |                                        |                                                                                      |
|         |                                             |             |                                        |                                                                                      |
