# Supplementary material
Source: publisher figshare collection journal article supplement (https://plos.figshare.com/articles/dataset/_/992947)
Supplement: Supplementary file 1 [file 1 › Table_S6.xlsx]

## Sheet: 91_HIV+
Protein	UniProt	Description	PeptideCount	35/36day pval
CRNN_HUMAN	Q9UBG3	Cornulin	58	3.74e-09
SPRR3_HUMAN	Q9UBC9	Small proline-rich protein 3	44	1.64e-08
HBD_HUMAN	P02042	Hemoglobin subunit delta	28	1.11e-05
TCO1_HUMAN	P20061	Transcobalamin-1	12	3.56e-05
TBB2A_HUMAN	Q13885	Tubulin beta-2A chain	26	4.04e-05
DSG3_HUMAN	P32926	Desmoglein-3	25	4.04e-05
CF058_HUMAN	Q6P5S2	UPF0762 protein C6orf58	27	4.09e-05
CYTT_HUMAN	P09228	Cystatin-SA	24	7.32e-05
THIO_HUMAN	P10599	Thioredoxin	12	7.52e-05
FILA_HUMAN	P20930	Filaggrin	87	9.82e-05
ZA2G_HUMAN	P25311	Zinc-alpha-2-glycoprotein	38	0.000254072
1433Z_HUMAN	Q6NUR9	14-3-3 protein zeta/delta	38	0.000257049
S10A9_HUMAN	P06702	Protein S100-A9	51	0.00026416
NUCB2_HUMAN	P80303	Nucleobindin-2	28	0.000547016
IGKC_HUMAN	P01834	Ig kappa chain C region	26	0.000563106
H2A3_HUMAN	Q7L7L0	Histone H2A type 3	24	0.000577418
H2A1C_HUMAN	Q93077	Histone H2A type 1-C	25	0.000577418
TBB3_HUMAN	Q13509	Tubulin beta-3 chain	16	0.00068214
CYTS_HUMAN	P01036	Cystatin-S	36	0.000734543
K1C15_HUMAN	P19012	Keratin, type I cytoskeletal 15	39	0.00097705
VATA_HUMAN	P38606	V-type proton ATPase catalytic subunit A	7	0.00113807
TBA1A_HUMAN	Q71U36	Tubulin alpha-1A chain	26	0.00113807
AXA2L_HUMAN	A6NMY6	Putative annexin A2-like protein	41	0.00129026
TBB5_HUMAN	P07437	Tubulin beta chain	28	0.00160083
ENOA_HUMAN	Q6GMP2	Alpha-enolase	56	0.00175799
PRDX2_HUMAN	P32119	Peroxiredoxin-2	11	0.00186335
K2C79_HUMAN	Q5XKE5	Keratin, type II cytoskeletal 79	37	0.00206093
AHNK_HUMAN	Q09666	Neuroblast differentiation-associated protein AHNAK	128	0.0030341
TALDO_HUMAN	P37837	Transaldolase	16	0.00354939
A2MG_HUMAN	P01023	Alpha-2-macroglobulin	66	0.00394183
GDIB_HUMAN	P50395	Rab GDP dissociation inhibitor beta	16	0.00394569
TERA_HUMAN	P55072	Transitional endoplasmic reticulum ATPase	29	0.00405478
PZP_HUMAN	P20742	Pregnancy zone protein	5	0.00448035
CALL3_HUMAN	P27482	Calmodulin-like protein 3	11	0.0048745
TBA3C_HUMAN	Q13748	Tubulin alpha-3C/D chain	21	0.0049266
K1C13_HUMAN	P13646	Keratin, type I cytoskeletal 13	215	0.00494648
STAT_HUMAN	P02808	Statherin	44	0.00531831
VDAC2_HUMAN	P45880	Voltage-dependent anion-selective channel protein 2	9	0.0054074
PERL_HUMAN	P22079	Lactoperoxidase	41	0.0054074
ANXA2_HUMAN	P07355	Annexin A2	55	0.00556242
PRB4_HUMAN	P10163	Basic salivary proline-rich protein 4	46	0.00671195
H2B1A_HUMAN	Q96A08	Histone H2B type 1-A	19	0.00731907
KLK1_HUMAN	P06870	Kallikrein-1	4	0.00743897
ALDOA_HUMAN	P04075	Fructose-bisphosphate aldolase A	24	0.00800588
MYH9_HUMAN	P35579	Myosin-9	93	0.00803546
ACTBL_HUMAN	Q562R1	Beta-actin-like protein 2	30	0.00832078
CAN1_HUMAN	P07384	Calpain-1 catalytic subunit	15	0.00843168
NAMPT_HUMAN	P43490	Nicotinamide phosphoribosyltransferase	15	0.0090966
IGHG4_HUMAN	P01861	Ig gamma-4 chain C region	47	0.0097034
PRB3_HUMAN	Q04118	Basic salivary proline-rich protein 3	23	0.0097034
CH60_HUMAN	P10809	60 kDa heat shock protein, mitochondrial	13	0.01
GDIA_HUMAN	P31150	Rab GDP dissociation inhibitor alpha	6	0.01
PGAM2_HUMAN	P15259	Phosphoglycerate mutase 2	8	0.01
RS2_HUMAN	P15880	40S ribosomal protein S2	6	0.01
CLCA4_HUMAN	Q14CN2	Calcium-activated chloride channel regulator 4	10	0.01
PGAM1_HUMAN	P18669	Phosphoglycerate mutase 1	20	0.01
ELNE_HUMAN	P08246	Neutrophil elastase	18	0.01
RAN_HUMAN	Q9CWI7	GTP-binding nuclear protein Ran	5	0.01
PDIA3_HUMAN	P30101	Protein disulfide-isomerase A3	16	0.01
ZG16B_HUMAN	Q96DA0	Zymogen granule protein 16 homolog B	78	0.01
PRDX6_HUMAN	P30041	Peroxiredoxin-6	11	0.01
PGAM4_HUMAN	Q8N0Y7	Probable phosphoglycerate mutase 4	10	0.01
S10A8_HUMAN	P05109	Protein S100-A8	31	0.01
H2B1C_HUMAN	P62807	Histone H2B type 1-C/E/F/G/I	32	0.01
CYTN_HUMAN	P01037	Cystatin-SN	42	0.01
PSME2_HUMAN	Q9UL46	Proteasome activator complex subunit 2	5	0.01
TKT_HUMAN	P29401	Transketolase	31	0.01
TRI29_HUMAN	Q14134	Tripartite motif-containing protein 29	21	0.01
SPB13_HUMAN	Q9UIV8	Serpin B13	20	0.02
TPM1_HUMAN	Q96IK2	Tropomyosin alpha-1 chain	13	0.02
CALX_HUMAN	P27824	Calnexin	11	0.02
HS902_HUMAN	Q14568	Putative heat shock protein HSP 90-alpha A2	8	0.02
K2C72_HUMAN	Q14CN4	Keratin, type II cytoskeletal 72	19	0.02
PRDX1_HUMAN	Q06830	Peroxiredoxin-1	16	0.02
1433F_HUMAN	Q04917	14-3-3 protein eta	5	0.02
TBA3E_HUMAN	Q6PEY2	Tubulin alpha-3E chain	15	0.02
HBB_HUMAN	Q549N7	Hemoglobin subunit beta	55	0.02
HV320_HUMAN	P01781	Ig heavy chain V-III region GAL	5	0.02
PDIA6_HUMAN	Q15084	Protein disulfide-isomerase A6	8	0.02
FAS_HUMAN	Q96IT0	Fatty acid synthase	31	0.02
HSPB1_HUMAN	Q9UC36	Heat shock protein beta-1	40	0.02
PGK1_HUMAN	P00558	Phosphoglycerate kinase 1	29	0.02
S10AA_HUMAN	P60903	Protein S100-A10	8	0.03
CYTA_HUMAN	P01040	Cystatin-A	13	0.03
CAPZB_HUMAN	P47756	F-actin-capping protein subunit beta	7	0.03
ATPA_HUMAN	P25705	ATP synthase subunit alpha, mitochondrial	19	0.04
KTDAP_HUMAN	P60985	Keratinocyte differentiation-associated protein	7	0.04
LDHA_HUMAN	P00338	L-lactate dehydrogenase A chain	25	0.04
CAH6_HUMAN	P23280	Carbonic anhydrase 6	77	0.04
HBA_HUMAN	P69905	Hemoglobin subunit alpha	78	0.04
K2C4_HUMAN	P19013	Keratin, type II cytoskeletal 4	266	0.04

## Sheet: 69_HIV-
Protein	UniProt	Description	PeptideCount	35/36day pval
ZG16B_HUMAN	Q96DA0	Zymogen granule protein 16 homolog B	78	1.23055e-08
TGM3_HUMAN	Q08188	Protein-glutamine gamma-glutamyltransferase E	102	3.06167e-08
A2ML1_HUMAN	A8K2U0	Alpha-2-macroglobulin-like protein 1	69	5.04582e-08
CYTB_HUMAN	P04080	Cystatin-B	31	2.42191e-07
ANXA1_HUMAN	P04083	Annexin A1	105	4.55899e-07
PDIA1_HUMAN	P07237	Protein disulfide-isomerase	41	1.2509e-06
A1AT_HUMAN	Q86U18	Alpha-1-antitrypsin	48	1.58271e-06
1433Z_HUMAN	Q6NUR9	14-3-3 protein zeta/delta	38	6.76307e-06
ELNE_HUMAN	P08246	Neutrophil elastase	18	1.51705e-05
ZA2G_HUMAN	P25311	Zinc-alpha-2-glycoprotein	38	2.38056e-05
MUC5B_HUMAN	Q7M4S5	Mucin-5B	68	2.89173e-05
LCN1_HUMAN	P31025	Lipocalin-1	31	4.90551e-05
ACTBM_HUMAN	Q9BYX7	Beta-actin-like protein 3	30	6.88825e-05
H2B1C_HUMAN	P62807	Histone H2B type 1-C/E/F/G/I	34	0.000113762
STAT_HUMAN	P02808	Statherin	44	0.000149538
PERM_HUMAN	P05164	Myeloperoxidase	44	0.00022892
APOA1_HUMAN	P02647	Apolipoprotein A-I	51	0.000332095
H2B1A_HUMAN	Q96A08	Histone H2B type 1-A	19	0.000387651
POTEE_HUMAN	Q6S8J3	POTE ankyrin domain family member E	37	0.000442085
HBB_HUMAN	Q549N7	Hemoglobin subunit beta	55	0.000472947
ANXA2_HUMAN	P07355	Annexin A2	55	0.000594278
POTEF_HUMAN	A5A3E0	POTE ankyrin domain family member F	33	0.00100716
ALDOA_HUMAN	P04075	Fructose-bisphosphate aldolase A	24	0.00122212
K1C16_HUMAN	P08779	Keratin, type I cytoskeletal 16	124	0.00134155
HBAZ_HUMAN	P02008	Hemoglobin subunit zeta	3	0.00227253
HBA_HUMAN	P69905	Hemoglobin subunit alpha	78	0.00265194
SMR3B_HUMAN	P02814	Submaxillary gland androgen-regulated protein 3B	45	0.00314565
CYC_HUMAN	P99999	Cytochrome c	13	0.00482313
A2MG_HUMAN	P01023	Alpha-2-macroglobulin	66	0.00490062
CRNN_HUMAN	Q9UBG3	Cornulin	58	0.00499241
AXA2L_HUMAN	A6NMY6	Putative annexin A2-like protein	41	0.00525233
6PGD_HUMAN	P52209	6-phosphogluconate dehydrogenase, decarboxylating	43	0.00533154
SPB3_HUMAN	Q8IXI3	Serpin B3	40	0.00565931
ILEU_HUMAN	P30740	Leukocyte elastase inhibitor	30	0.00593805
LYSC_HUMAN	P61626	Lysozyme C	22	0.00648058
ALBU_HUMAN	Q9P157	Serum albumin	162	0.00688311
ACTA_HUMAN	P62736	Actin, aortic smooth muscle	57	0.00689531
ACTS_HUMAN	P68133	Actin, alpha skeletal muscle	62	0.00689531
ACTC_HUMAN	P68032	Actin, alpha cardiac muscle 1	67	0.00689531
ACTBL_HUMAN	Q562R1	Beta-actin-like protein 2	30	0.0083497
TRFE_HUMAN	P02787	Serotransferrin	53	0.00921669
TCO1_HUMAN	P20061	Transcobalamin-1	12	0.00951439
TRI29_HUMAN	Q14134	Tripartite motif-containing protein 29	21	0.01
ENOA_HUMAN	Q6GMP2	Alpha-enolase	56	0.01
SBSN_HUMAN	Q6UWP8	Suprabasin	26	0.01
PIP_HUMAN	P12273	Prolactin-inducible protein	22	0.01
PLAK_HUMAN	P14923	Junction plakoglobin	44	0.01
HIS1_HUMAN	P15515	Histatin-1	33	0.01
FIBB_HUMAN	P02675	Fibrinogen beta chain	30	0.01
GDIR1_HUMAN	P52565	Rho GDP-dissociation inhibitor 1	3	0.01
SPB13_HUMAN	Q9UIV8	Serpin B13	20	0.01
LC1L1_HUMAN	Q5VSP4	Putative lipocalin 1-like protein 1	9	0.01
CF058_HUMAN	Q6P5S2	UPF0762 protein C6orf58	27	0.01
VIME_HUMAN	Q96ML2	Vimentin	41	0.02
ACTN1_HUMAN	P12814	Alpha-actinin-1	34	0.02
AK1BA_HUMAN	O60218	Aldo-keto reductase family 1 member B10	14	0.02
SPLC2_HUMAN	Q96DR5	Short palate, lung and nasal epithelium carcinoma-associated protein 2	70	0.02
NDKA_HUMAN	P15531	Nucleoside diphosphate kinase A	4	0.02
PRDX1_HUMAN	Q06830	Peroxiredoxin-1	16	0.02
IGKC_HUMAN	P01834	Ig kappa chain C region	26	0.02
PRB2_HUMAN	P02812	Basic salivary proline-rich protein 2	118	0.03
MMP9_HUMAN	P14780	Matrix metalloproteinase-9	11	0.03
MYL6_HUMAN	P60660	Myosin light polypeptide 6	9	0.03
APOA2_HUMAN	P02652	Apolipoprotein A-II	12	0.03
TPM1_HUMAN	Q96IK2	Tropomyosin alpha-1 chain	13	0.03
TBA3E_HUMAN	Q6PEY2	Tubulin alpha-3E chain	15	0.03
G6PI_HUMAN	P06744	Glucose-6-phosphate isomerase	32	0.04
K2C73_HUMAN	Q86Y46	Keratin, type II cytoskeletal 73	25	0.04
EF1G_HUMAN	P26641	Elongation factor 1-gamma	10	0.04
